# Supplementary material for: An atlas of alternative splicing profiles and functional associations reveals new regulatory programs and genes that simultaneously express multiple major isoforms
Source: HighWire-hosted journal article supplement (doi:10.1101/gr.220962.117), 2017-08-30
Supplement: Supplemental_Fig_S7.pdf [file Supplemental_Fig_S7.pdf]

**A**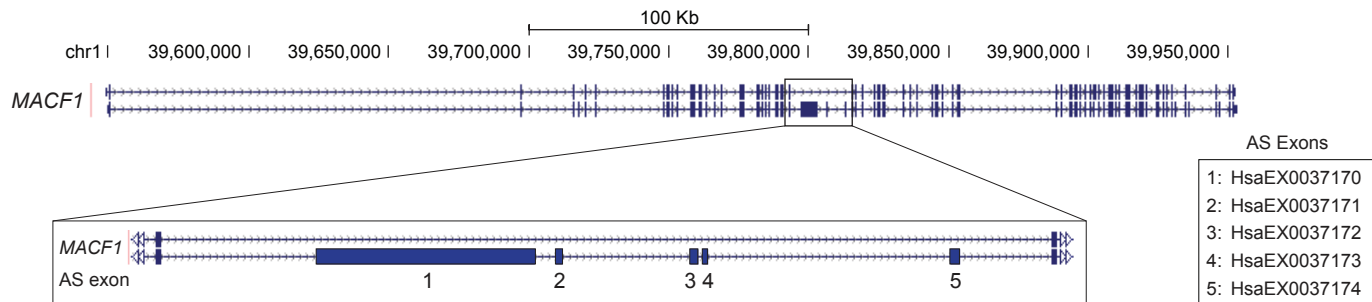**B**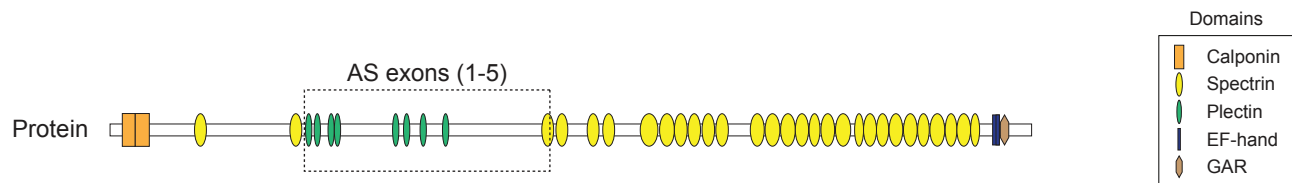**C**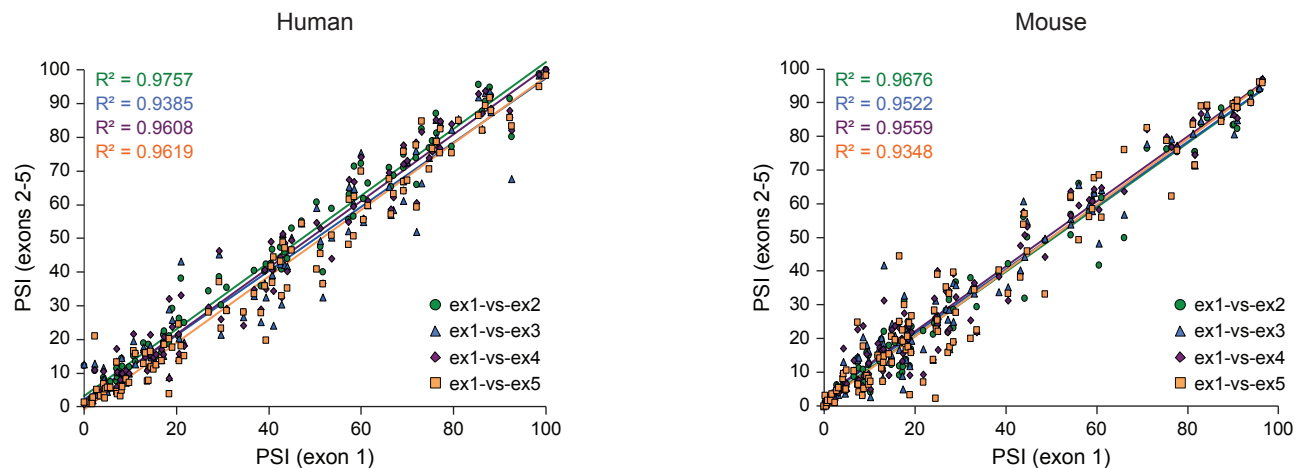

**Supplemental Figure S7 – *MACF1*: example of highly correlated intragenic alternative exons**

A) Genome organization of the human *microtubule-actin crosslinking factor 1* (*MACF1*) gene, highlighting a M-AltEx event consisting of five exons. B) Domain organization of the MACF1 protein, and region overlapped by the alternative exons in (A), consisting of eight plectin domains (green). C) High pairwise correlation coefficients ( $R^2 > 0.93$ ) between the PSIs of pairs of exons from the AltEx event of *MACF1* in human and mouse.
