# Supplementary material for: An atlas of alternative splicing profiles and functional associations reveals new regulatory programs and genes that simultaneously express multiple major isoforms
Source: HighWire-hosted journal article supplement (doi:10.1101/gr.220962.117), 2017-08-30
Supplement: Supplemental_Fig_S14.pdf [file Supplemental_Fig_S14.pdf]

**A**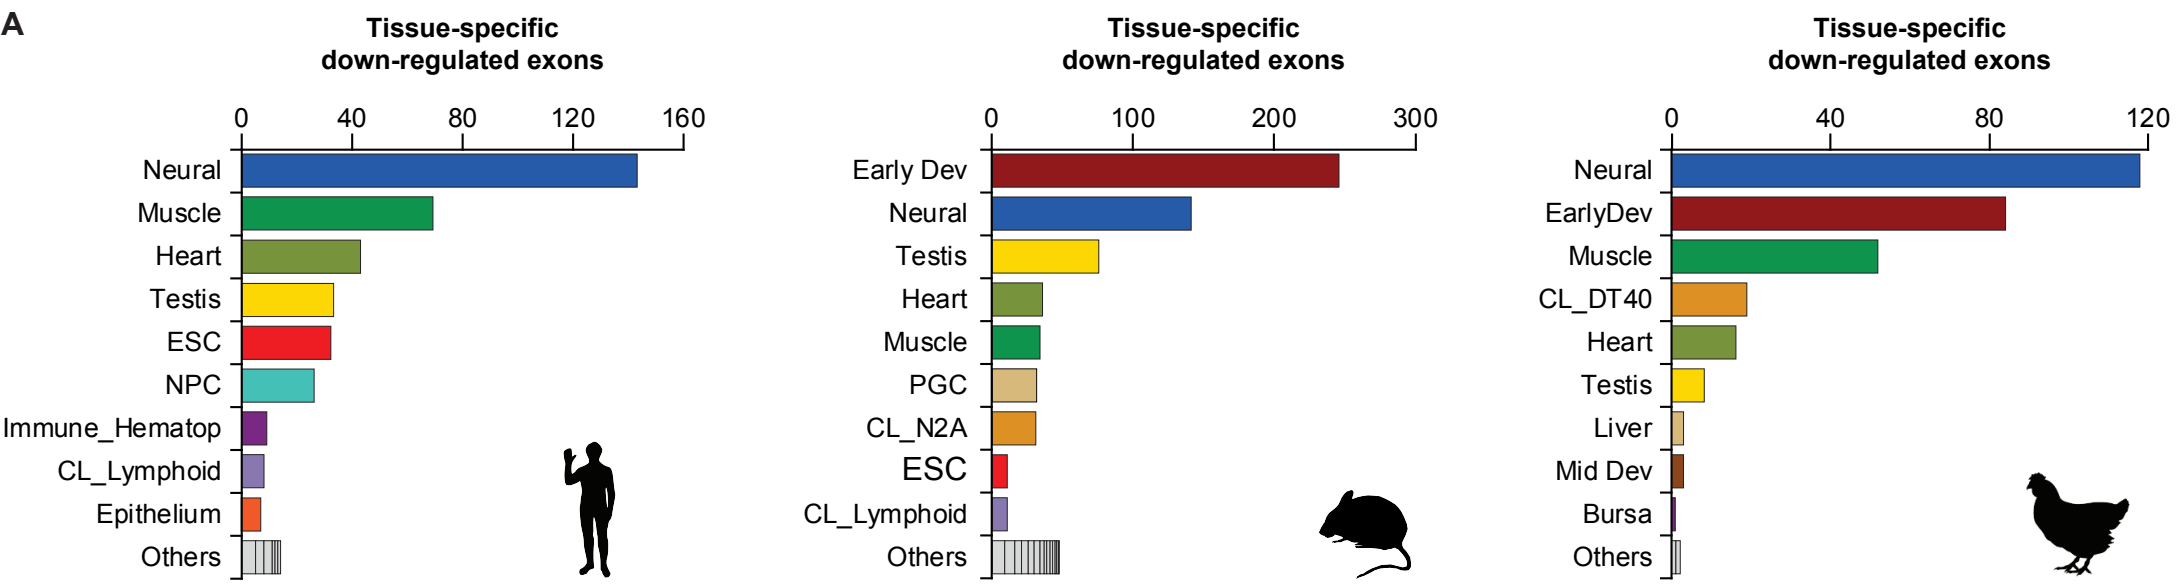**B**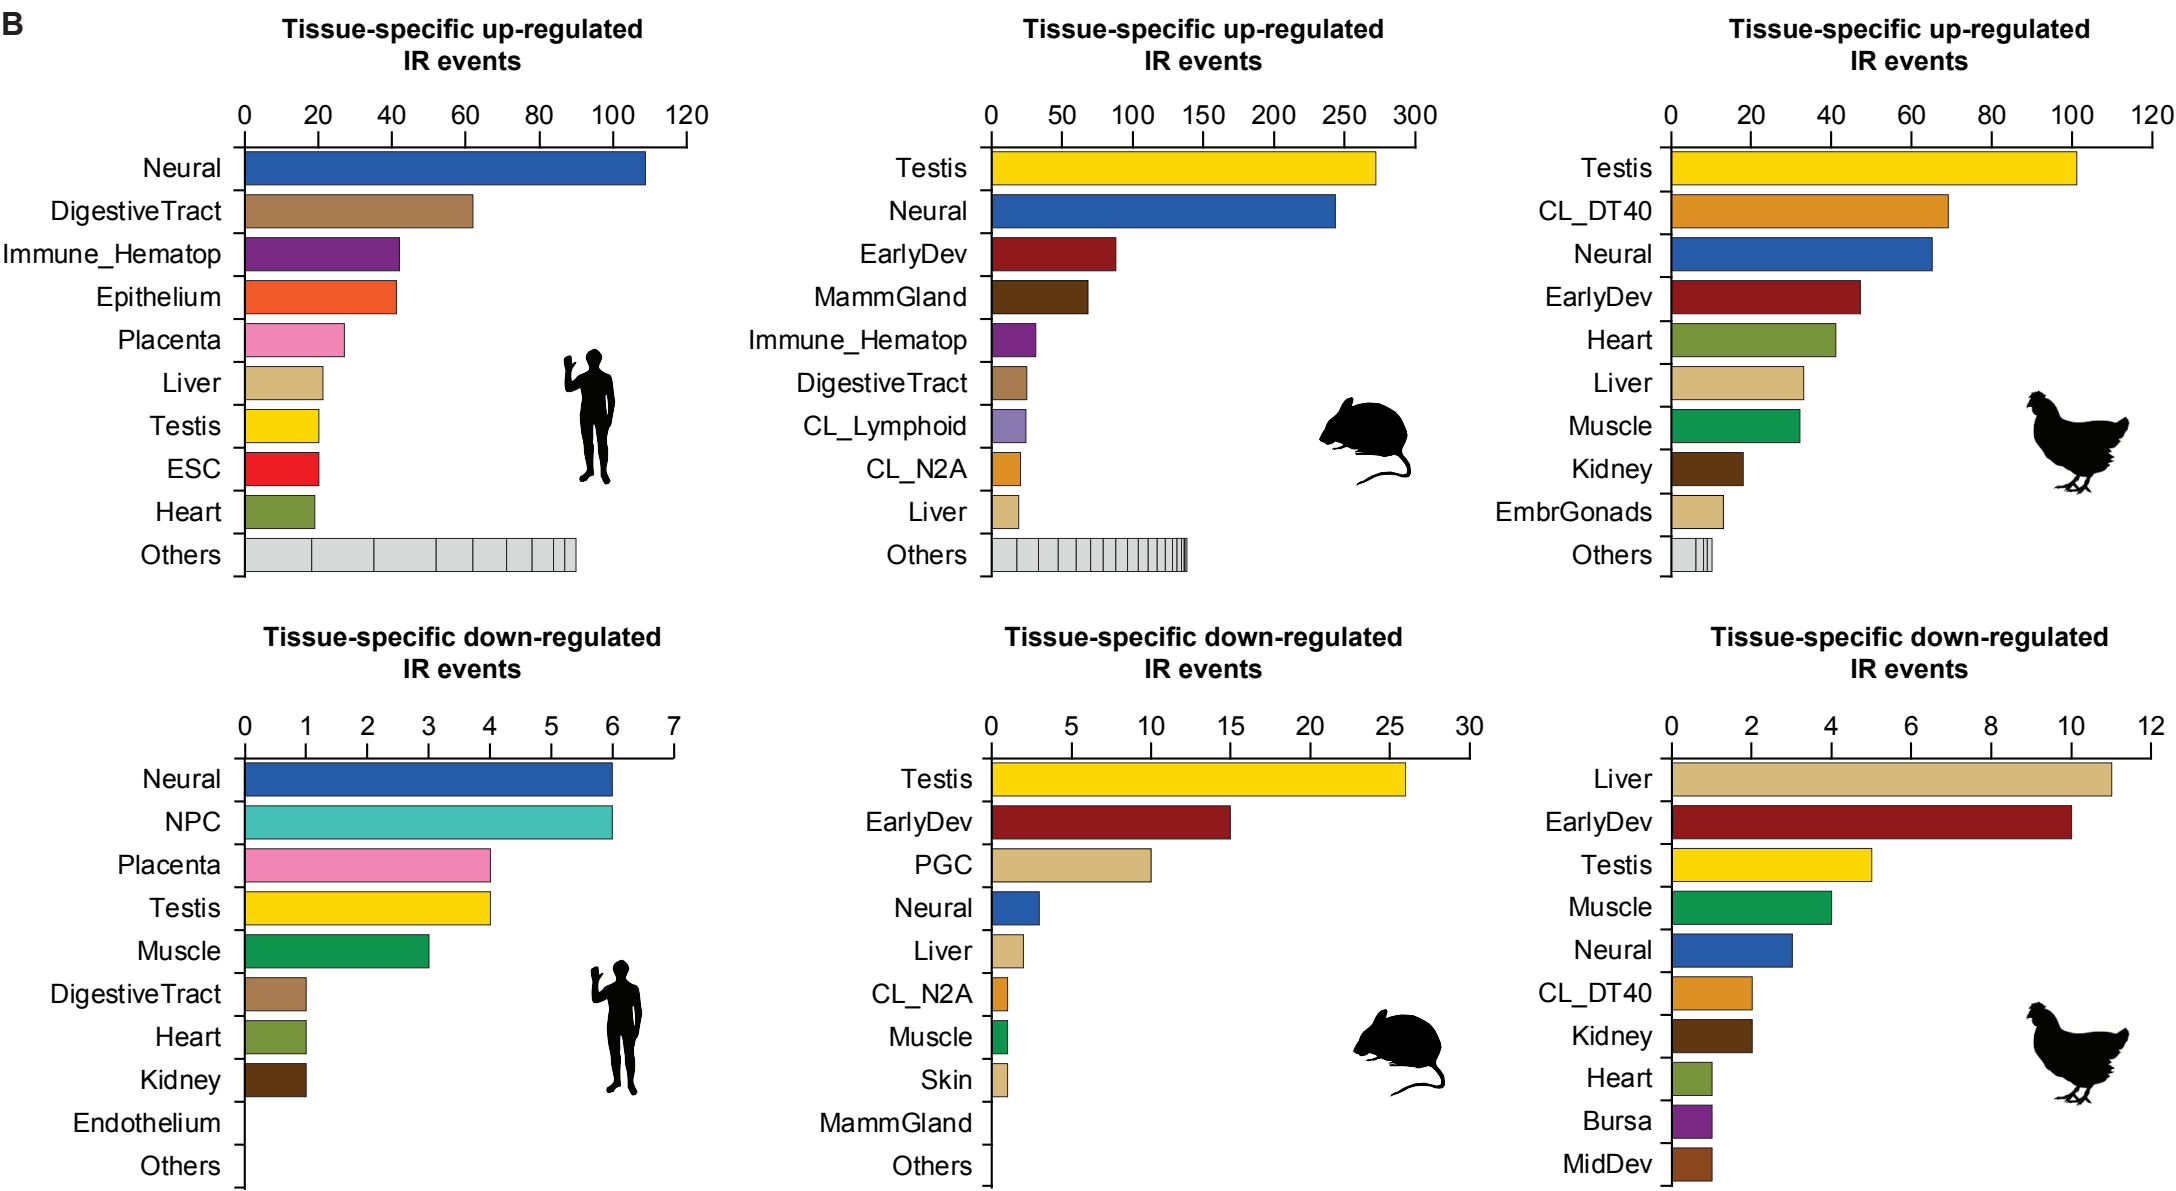

### **Supplemental Figure S14 – Tissue-specific exon skipping and intron retention in vertebrates**

Bar plots showing the number of exons with decreased PSI (A) and the number of introns with increased (B) and decreased (C) PSI in a specific tissue compared to all other tissue types. “Early Dev” refers to early embryonic stages in mouse (from oocyte to 8-cell stage) and chicken (from Stage X to HH6); “Mid Dev” refers to intermediate stages of embryo development in chicken (from HH11 to HH38).
