# Supplementary material for: An atlas of alternative splicing profiles and functional associations reveals new regulatory programs and genes that simultaneously express multiple major isoforms
Source: HighWire-hosted journal article supplement (doi:10.1101/gr.220962.117), 2017-08-30
Supplement: Supplemental_Fig_S17.pdf [file Supplemental_Fig_S17.pdf]

A

| Tissue | ESC | iPS | Brain | Cerebellum | Heart | Muscle | Testis | Ovary |
|--------|-----|-----|-------|------------|-------|--------|--------|-------|
| Human  | 4   | 2   | 5     | 2          | 3     | 3      | 3      | 2     |
| Mouse  | 6   | 2   | 5     | 3          | 4     | 3      | 3      | 2     |

| Tissue | Placenta | Epithelial | Stomach | Colon | Adipose | Adrenal | Kidney | Liver |
|--------|----------|------------|---------|-------|---------|---------|--------|-------|
| Human  | 3        | 2          | 2       | 3     | 3       | 2       | 3      | 3     |
| Mouse  | 3        | 3          | 3       | 3     | 3       | 3       | 3      | 3     |

| Tissue | Lung | Prostate | Spleen | Thymus | Lymph_Node | CL_Immune | Thyroid | Total |
|--------|------|----------|--------|--------|------------|-----------|---------|-------|
| Human  | 3    | 3        | 2      | 2      | 2          | 2         | 3       | 62    |
| Mouse  | 3    | 2        | 3      | 3      | 2          | 2         | 2       | 69    |

B

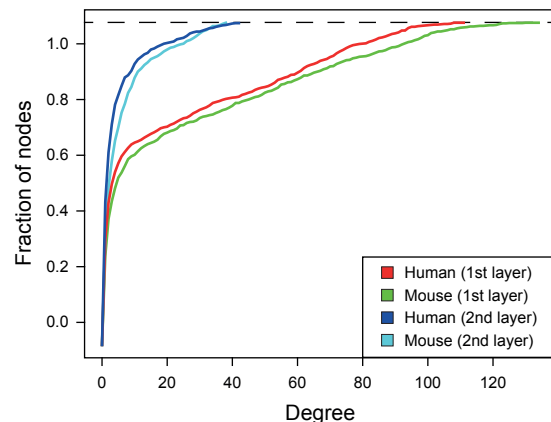

C

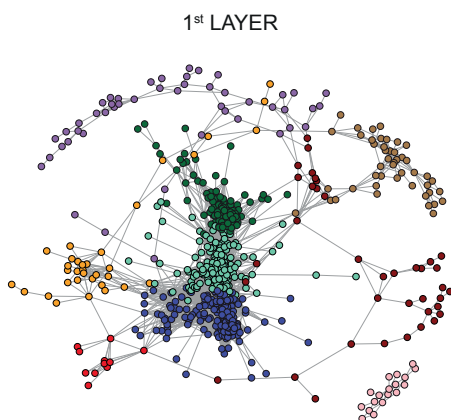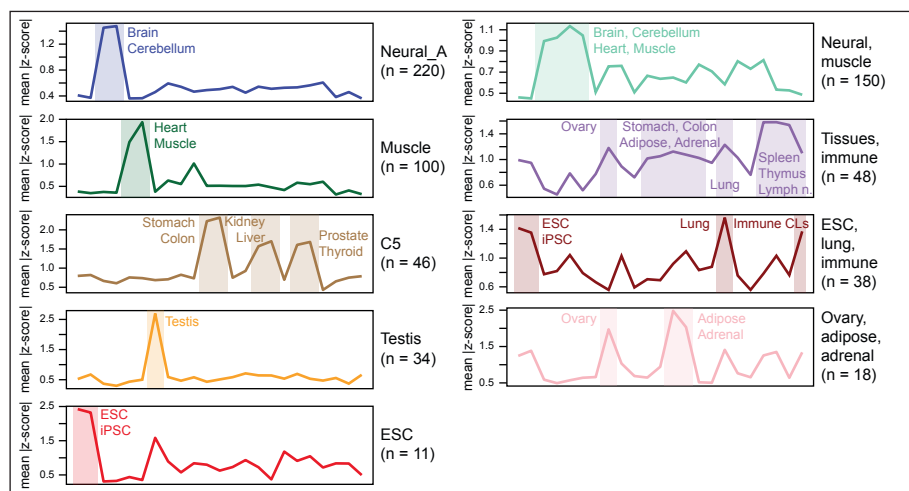

D

Without  
Neural/Muscle

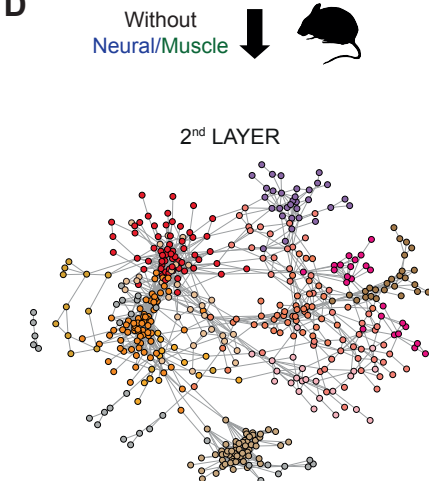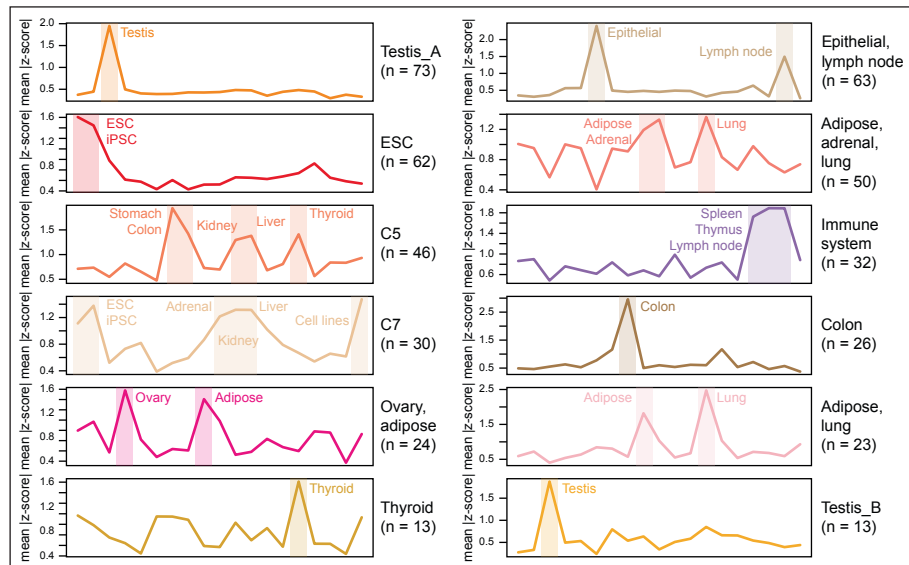

### **Supplemental Figure S17 – Mouse co-regulated splicing network analysis**

A) Matched tissue and cell types in human and mouse and corresponding number of replicates in each species used in the network analysis. B) Cumulative plot of the degree for the resulting splicing network for 1,033 conserved and highly alternatively spliced exons in human (red, dark blue) and mouse (green, light blue) including (1<sup>st</sup> layer) or excluding (2<sup>nd</sup> layer) neural and muscle tissues. C-D) Left: Graphical representation of the mouse splicing networks, highlighting the different exon communities for the 1<sup>st</sup> (C) and 2<sup>nd</sup> (D) layer networks. Right: Plot of the mean absolute Z-score across tissues for each community of the 1<sup>st</sup> (A) and 2<sup>nd</sup> (B) layer mouse networks. Dominant tissues are highlighted. Communities were named based on dominant tissues, when possible. For simplicity, only communities with 10 or more AS events are displayed.
