# Supplementary material for: An atlas of alternative splicing profiles and functional associations reveals new regulatory programs and genes that simultaneously express multiple major isoforms
Source: HighWire-hosted journal article supplement (doi:10.1101/gr.220962.117), 2017-08-30
Supplement: Supplemental_Fig_S23.pdf [file Supplemental_Fig_S23.pdf]

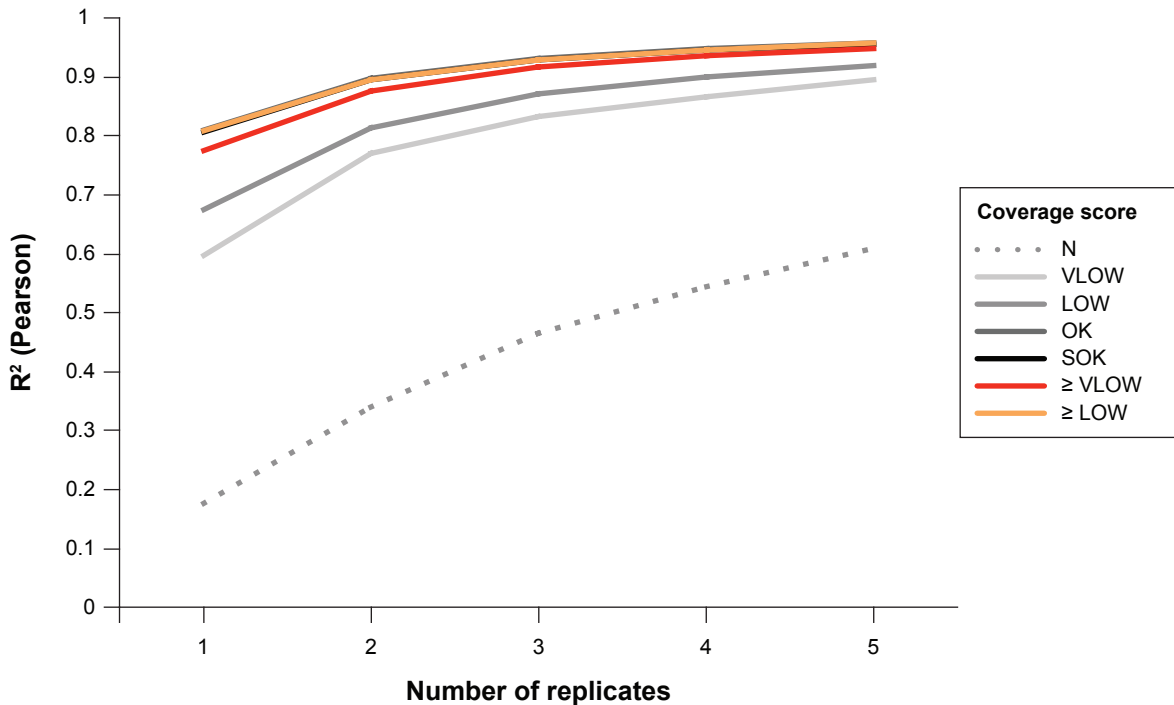

### **Supplemental Figure S23 – Impact of replicate number and read coverage on PSI quantification**

$R^2$  of Pearson correlations between pairs of PSIs obtained from averaging an increasing number of replicates from samples of the same tissue type from the GTEx dataset, using different read coverage cutoffs. ‘N’, ‘VLOW’, ‘LOW’, ‘OK’ and ‘SOK’: all PSI values used to obtain the averages have exactly that associated coverage score. ‘ $\geq$ VLOW’ and ‘ $\geq$ LOW’ correspond to PSI values whose associated coverage score is VLOW or higher (i.e. VLOW, LOW, OK and SOK), or LOW or higher, respectively, as used throughout the manuscript.
