# Supplementary material for: An atlas of alternative splicing profiles and functional associations reveals new regulatory programs and genes that simultaneously express multiple major isoforms
Source: HighWire-hosted journal article supplement (doi:10.1101/gr.220962.117), 2017-08-30
Supplement: Supplemental_Figure_Legends.docx [file Supplemental_Figure_Legends.docx]

**SUPPLEMENTAL FIGURE LEGENDS**

**Supplemental Figure S1 – Overview of the *vast-tools* pipeline workflow**

*vast-tools* consists of various modules to quantify and then analyze AltEx, IR, Alt3 and Alt5 events, as well as gene expression levels. *vast-tools* uses raw FASTQ reads (single or paired end, top-left), which are first trimmed to 50-nt reads using 25-nt sliding windows to increase effective exon-exon junction coverage. These sub-reads are mapped to the genomic sequence, and the non-mapping reads will then be mapped to multiple exon-exon junction (EEJ) libraries. To quantify AltEx events (purple), *vast-tools align* uses three complementary modules: (i) the ‘Transcript-based module’ (gray), which relies on EEJs for single and multiple exon skipping events defined using full transcript information from ESTs, cDNAs, genome annotation and RNA-seq-based transcript annotations (e.g. cufflinks) [Ref 2 in figure: (Irimia et al. 2014)]; (ii) the ‘Microexon module’ (blue), which uses EEJs and exon-microexon-exon junctions to specifically quantify short exons (3-15 nucleotides) [Ref 2: (Irimia et al. 2014)]; and (iii) the ‘splice site-based module’ (red), whose EEJ library contains all possible forward combinations of exons for each gene [Ref 3: (Han et al. 2013)]. The outputs from the three modules are then merged to obtain a non-redundant PSI estimate for each alternative exon (purple box). In addition, the output of the splice site-based module is used to quantify the use of alternative 5’ and 3’ splice site choices (Alt3 and Alt5 events; green)[Ref 2: (Irimia et al. 2014)]. Finally, an independent module defines and quantifies percent of intron retention (orange), by mapping raw sub-reads to: (i) a library of EEJ and exon-intron junctions (EIJs), which are used to quantify retention levels; and (ii) a library of intron body fragments (200-nt in the middle of the intron) which are taken into account for the binomial test for read imbalance between the two EIJs [Ref 4: (Braunschweig et al. 2014)]. In parallel, the first 50 nucleotides of the reads (only the forward end, when paired) are mapped to a library of one representative isoform per gene to derive gene expression quantifications using the cRPKM metric [Ref 1: (Labbe et al. 2012)]. The PSIs for all types of AS events are then combined (together with any other RNA-seq samples analyzed using *vast-tools align*) into a unique table using *vast-tools combine*. This table can then be used to run *vast-tools compare* or *vast-tools diff* to identify differentially spliced AS events, and *vast-tools plot* to create figures displaying the PSIs across samples (further details and availability in <https://github.com/vastgroup/vast-tools>).

**Supplemental Figure S2 – Benchmarking of *vast-tools*: performance and sensitivity on AS identification**

A) User time and maximal memory usage for each tool required to process 50 [light] or 150 [dark] million paired-end reads. B) Number of differentially included (ΔPSI > 15 [light], ΔPSI < -15 [dark]) alternative exons by size category (3-9 nt, 10-15 nt, 16-27 nt and > 27 nt) identified by each tool when comparing RNA-seq data from ESC (DIV -8) and differentiated neurons (DIV 28) from (Hubbard et al. 2013). C) Number of AS events by type identified by each tool in our simulated dataset, as well as the total number of events (TOTAL) and those identified by all tools (COM). AS events are separated into complex (light) or simple (dark), depending on whether multiple competing splice sites are present or not.

**Supplemental Figure S3 – Benchmarking of *vast-tools*: accuracy on AS quantification using simulated reads**

Test of accuracy for each tool for PSI and ΔPSI estimations for each type of AS event using simulated RNA-seq data. Each estimate was binned depending on its deviation from the ground truth (ΔPSI <1% [dark green], ΔPSI between 1-5% [light green], 5-10% [yellow], 10-25% [orange] or ΔPSI > 25% [red]). For AltEx events, exons were split based on whether the corresponding gene had a ratio of reads per nucleotide higher (high coverage) or lower (low coverage) than one in the simulated dataset. V: *vast-tools*, Q: MAJIQ, I: MISO, R: rMATS.

**Supplemental Figure S4 – Benchmarking of *vast-tools*: accuracy on AS quantification using real RT-PCR data**

A-D) Correspondence between PSI (A,C) or ΔPSI (B,D) estimates from RT-PCRs and RNA-seq using four different software: *vast-tools* (VT, blue), MAJIQ (magenta), MISO (green) and rMATS (purple) for two different sets of samples obtained from the original MAJIQ (A,B; (Vaquero-Garcia et al. 2016)) and MATS (C,D; (Shen et al. 2012)) papers. Adjusted R2 are provided for each tool and test on the right panel.

**Supplemental Figure S5 – Annotation and quantification of AS events in human, mouse and chicken**

A) Left: number of AS events of each type, including intron retention (IR, orange), cassette exons (AltEx, purple) and alternative splice site donor (Alt5, dark green) and acceptors (Alt3, light green) in human (top), mouse (middle) and chicken (bottom). Center: number of AltEx events by number of contiguous alternative exons; most events consist of a single exon. Right: number of alternative exons, by length class. B) Percent of AS events in VastDB by type that are annotated in current Ensembl releases (black) or identified *de novo* (grey) by *vast-tools* for each species. IR is not shown, as all introns profiled by *vast-tools* are annotated by definition. C) Example of a tissue-regulated alternative exon of 34 nt in *Ptbp2*. RT-PCR and RNA-seq data show that the exon has the highest inclusion in ESCs and neural samples and the lowest in spleen. Bottom: Mapping of the alternative (A) and neighboring (C1 and C2) exons with respect to protein domains and disordered regions (grey), as well as in the protein structure. D) High correlation for human (red), mouse (green) and chicken (blue) PSI estimates from RT-PCR and VastDB RNA-seq data using independent RNA samples.

**Supplemental Figure S6 – Multiexonic AltEx and IR events show high intragenic co-regulation**

A,B) Distributions of Spearman correlation coefficients for pairs of human (A) and mouse (B) AS events in the same/different genes (dark/light colors). SE-AltEx: pairs of single exon skipping events, separated by at least one constitutive exon; ME-AltEx: exon pairs from multi-exon skipping events; IR: pairs of IR events; Alt3 vs Alt5: a pair of Alt3 and Alt5 events in the same gene, but not affecting the same exons; AltEx vs IR: a cassette exon and an IR events; AltEx vs Alt3: a cassette exon and an alternative 3′ss choice. P-values correspond to a Wilcoxon Sum Rank test. C,D) Density of ranks of intragenic pairs within 100 random intergenic pairs of the same types of AS event for human (C) and mouse (D). Most intragenic pairs for M-AltEx and IR have high ranks (i.e. highly positively co-regulated), although a fraction of M-AltEx also shows very low ranks (i.e. mutually exclusive exons; blue arrows).

**Supplemental Figure S7 – *MACF1*: example of highly correlated intragenic alternative exons**

A) Genome organization of the human *microtubule-actin crosslinking factor 1* (*MACF1*) gene, highlighting a M-AltEx event consisting of five exons. B) Domain organization of the MACF1 protein, and region overlapped by the alternative exons in (A), consisting of eight plectin domains (green). C) High pairwise correlation coefficients (R2 > 0.93) between the PSIs of pairs of exons from the AltEx event of *MACF1* in human and mouse.

**Supplemental Figure S8 – Multi-IR genes are enriched for adenyl-nucleotide binding functions**

A,B) Example of a gene with multiple coordinated IR events (*hairy and enhancer of split-1*, *HES1*): exon-intron organization and annotated IR events (A) and inclusion levels for the three IR events across multiple tissues (B). C) Enriched Gene Ontology categories using DAVID scores for human (top) and mouse (bottom) genes containing more than five highly alternatively spliced IR events.

**Supplemental Figure S9 – RT-PCR validation of representative PanAS events**

A) Example of a PanAS exon overlapping a Zn finger domain in the Methyl-CpG Binding Domain Protein 1 (*Mbd1*) gene and its PSIs as estimated by RT-PCR and RNA-seq data in VastDB. B) RT-PCR validations across a wide range of tissues for a subset of representative PanAS events in mouse genes related to transcriptional regulation and chromatin modification: *Axin1*, *Cnot4*, *Foxj3*, *Hdac7*, *Kat5*, *Kdm1a*, *Ncor1*, *Pcgf5*, *Stag2*, and *Zmynd11*.

**Supplemental Figure S10 – Functional and proteomic features of PanAS events**

A) Distribution of PSIs across 400 samples from 16 tissues from GTEx for low-frequency AS (LFAS, yellow), SwitchAS (blue) and PanAS (red) events. B-D) Distribution of PSIs for groups of Alt3 (B), Alt5 (C) and IR (D) that are alternatively spliced (10%<PSI<90%) in an increasing fraction of samples. Red dots, median PSI of the bin. E) Total number of AS events in each of the bins in the violin plots of B-D. F) Enriched Gene Ontology categories using DAVID scores for human genes harboring Alt3, Alt5 and IR events that are alternatively spliced in >80% of the samples. (*) Complete GO term: Positive regulation of nucleobase, nucleoside, nucleotide and nucleic acid metabolic process. G) Enriched Gene Ontology categories using DAVID scores for mouse genes harboring AltEx, Alt3, Alt5 and IR events that are alternatively spliced in >80% of the samples. H) Mean disorder rate of residues encoded by alternative (A) and neighboring (C1, C2) exons for each regulatory category: LFAS (yellow), SwitchAS (blue) and PanAS (red). I) Fractions of residues from alternative (A) and neighboring (C1, C2) exons that overlap structured domains for each regulatory category: LFAS, SwitchAS and PanAS.

**Supplemental Figure S11 – Co-expression of PanAS isoforms in single cells**

For each regulatory category (low-frequency AS [LFAS], SwitchAS and PanAS), PSI distributions across individual cells from different human and mouse cell types. Human: ESCs (hESCs) and lung cancer cells; Mouse: 2-cell and 8-cell stage embryo, ESCs cultured in 2i (mESCs 2i) or serum (mESCs serum) conditions, bone marrow derived dendritic cells (BMDCs), and two populations of neurons (Cux2+ and Nr5a1+). The number of tested exons for each category is provided in parenthesis. P-values correspond to two-sided Fisher’s exact tests between the numbers of events with PSI values corresponding to alternative (10%<PSI<90%) versus non-alternative in each regulatory group.

**Supplemental Figure S12 – Principal component analyses show stronger signal for neural, muscle and pluripotent samples in AS measurements compared to gene expression**

Plot of principal components 1 and 2 from PCA provide a clear separation of neural (blue), muscle (green) and pluripotent (red) samples in human (A), mouse (B) and chicken (C) when using AS measurements for all AS types than gene expression measurements in the same species (D-F). Samples names starting with CL indicate cell lines. Labels for most tissue samples are not shown for clarity. For AS, only AS events with read coverage of VLOW or higher for at least 40 samples and a standard deviation of PSIs higher than 20 were used; Samples for which more than 50% of AS events had null PSI values (due to lack of read coverage) were excluded. For gene expression, only genes with a cRPKM ≥ 5 and a total of 50 raw reads in at least one sample, and a CV ≥ 3 were considered.

**Supplemental Figure S13 – Hierarchical clustering of AS events included in VastDB for mouse and chicken**

A,B) Heatmap and hierarchical clustering of AS events included in VastDB in widely expressed mouse (A) and chicken (B) genes. Sample names starting with CL indicate cell lines. Only AS events with read coverage of VLOW or higher for at least 40 samples and a standard deviation of PSIs higher than 20 were used; Samples for which more than 80% of AS events had null PSI values (due to lack of read coverage) were excluded.

**Supplemental Figure S14 – Tissue-specific exon skipping and intron retention in vertebrates**

Bar plots showing the number of exons with decreased PSI (A) and the number of introns with increased (B) and decreased (C) PSI in a specific tissue compared to all other tissue types. “Early Dev” refers to early embryonic stages in mouse (from oocyte to 8-cell stage) and chicken (from Stage X to HH6); “Mid Dev” refers to intermediate stages of embryo development in chicken (from HH11 to HH38).

**Supplemental Figure S15 – RT-PCR validations for tissue-regulated AS events**

RT-PCR validations and corresponding VastDB RNA-seq PSI estimates for several tissue-regulated mouse exons: *Aifm3* (neural, increased PSI), *Arhgap10* (heart, decreased PSI), *1110002L01Rik* (testis, increased PSI), *Acss2* (muscle and heart, increased PSI), *Fkbp14* (liver/kidney/stomach, increased PSI), *Slc9a7* (neural, decreased PSI).

**Supplemental Figure S16 – Comparison of tissue differences in PSIs between GTEx and VastDB**

For each tissue type (query tissue), for exons with strong PSI differences (ΔPSI > 25) in VastDB between the query and another (target) tissue, boxplots represent distributions of absolute ΔPSIs for: (i) GTEx samples within the query tissue (INTRA); (ii) GTEx samples from the query tissue versus VastDB samples from the query tissue (INTRA_VAST); (iii) GTEx samples from the query tissue versus GTEx samples from the target tissue (INTER); (iv) GTEx samples from the query tissue versus VastDB samples from the target tissue (INTER_VAST); and (v) VastDB samples from the query tissue versus VastDB samples from the target tissue (VASTDB).

**Supplemental Figure S17 – Mouse co-regulated splicing network analysis**

A) Matched tissue and cell types in human and mouse and corresponding number of replicates in each species used in the network analysis. B) Cumulative plot of the degree for the resulting splicing network for 1,033 conserved and highly alternatively spliced exons in human (red, dark blue) and mouse (green, light blue) including (1st layer) or excluding (2nd layer) neural and muscle tissues. C-D) Left: Graphical representation of the mouse splicing networks, highlighting the different exon communities for the 1st (C) and 2nd (D) layer networks. Right: Plot of the mean absolute Z-score across tissues for each community of the 1st (A) and 2nd (B) layer mouse networks. Dominant tissues are highlighted. Communities were named based on dominant tissues, when possible. For simplicity, only communities with 10 or more AS events are displayed.

**Supplemental Figure S18 – Chicken co-regulated splicing network analysis**

A,B) Left: Graphical representation of the chicken splicing networks, highlighting the different exon communities for the 1st (A) and 2nd (B) layer networks. Right: Plot of the mean absolute Z-score across tissues for each community of the 1st (A) and 2nd (B) layer chicken networks. Dominant tissues are highlighted. Communities were named based on dominant tissues, when possible. For simplicity, only communities with 10 or more AS events are displayed. C) Heatmap showing the percent of node (exon) overlap between chicken (Y-axes) and human (X-axes) communities for the 1st (left) and 2nd (right) layer networks. P-values correspond to Bonferroni corrected one-sided Fisher’s exact tests. E) Percent of edge conservation for each main chicken community in the human network, for the 1st (left) and 2nd (right) layer networks, and expected percent of conservation based on randomized networks of the same size of the tested community. Error bars in controls represent first and third quartiles of the distribution. P-values correspond to permutation tests with 1,000 random networks: *** P-value ≤ 10-3, ** 10-3 < P-value < 0.01, * 0.01 ≤ P-value < 0.05.

**Supplemental Figure S19 – Clustering of human, mouse and chicken orthologous exons**

Unsupervised hierarchical clustering of 455 orthologous exons that are highly alternatively spliced in human (red), mouse (green) and chicken (blue) using scaled averaged PSIs for 14 matched tissues in the three species. Heatmap depicts the Spearman correlation between tissues.

**Supplemental Figure S20 – Example of a gene view entry from VastDB**

Adapted screenshot of the Gene view from VastDB (http://vastdb.crg.eu) for a representative human gene (Ensembl ID: ENSG00000004487, gene symbol: *KDM1A*). Each gene view displays: general gene information, screenshot with hyperlink to the UCSC Genome Browser indicating the AS events that are annotated in VastDB, interactive plot with gene expression values across 63 human cell and tissue types from averaging 118 samples, plots of expression levels for other datasets of special interest, list of annotated AS events, and list of orthologous genes for species available in VastDB.

**Supplemental Figure S21 – Example of an AS event view entry in VastDB**

Adapted screenshot of the Event view from VastDB (http://vastdb.crg.eu) for a human AltEx event (based on HsaEX0033219 and HsaEX0033220). Event view includes, from top to bottom, general information, sequence information, protein impact of the alternative sequence, evolutionary conservation (currently with mouse and chicken), suggested primers for RT-PCR validation, genomic context (linking to UCSC Genome Browser), interactive plot of PSI across 63 human cell and tissue types from averaging 118 samples, plots of PSIs for other datasets of special interest, links to other AS databases, and mapping to protein structures (when available). General information, sequence data, domain mappings, conservation, PCR primers and genomic context correspond to HsaEX0033220. Associated events, inclusion levels and protein structure correspond to HsaEX0033219.

**Supplemental Figure S22 – Structural analysis of AS events in VastDB**

A) Examples of two proteins structures with alternative (A, red) and neighboring (C1 [orange] and C2 [beige]) exons mapped: HsaEX0017384, in the *CRYL1* gene, in an experimentally determined structure (PDB ID: 3F3S), and HsaEX0034475, in the *KIF1B* gene, in a modeled structure. B) Schematic representation of the pipeline used to map exons to PDB protein structures or to models done with Phyre2. C) Pie charts displaying the number of AltEx events covered in PDB or modeled protein structures for human (top), mouse (center) and chicken (bottom).

**Supplemental Figure S23 – Impact of replicate number and read coverage on PSI quantification**

R2 of Pearson correlations between pairs of PSIs obtained from averaging an increasing number of replicates from samples of the same tissue type from the GTEx dataset, using different read coverage cutoffs. ‘N’, ‘VLOW’, ‘LOW’, ‘OK’ and ‘SOK’: all PSI values used to obtain the averages have exactly that associated coverage score. ‘≥VLOW’ and ‘≥LOW’ correspond to PSI values whose associated coverage score is VLOW or higher (i.e. VLOW, LOW, OK and SOK), or LOW or higher, respectively, as used throughout the manuscript.

**Supplemental Table S1 – RNA-seq samples included in VastDB and in the present study**

The first three sheets contain, for each of the species (human, mouse, and chicken), the name of the sample in VastDB, the SRA identifiers that comprise each individual sample, the tissue type to which they are averaged (if more than one of the kind) in the VastDB PSI/cRPKM plots, the tissue super-type to which they belong (which provides the color code), the read length and whether it is single (SE) or paired-end (PE), the total number of reads, the source (PubMed ID and/or GEO entry) and other relevant information. The remaining sheets provide information on additional samples used in the study (e.g. those used for benchmarking and in single cell analysis), and the subsets of samples used for the tissue-specific and network analyses.

**Supplemental Table S2 – Raw data from the benchmarking analysis**

Raw values from the benchmarking analysis in Supplemental Fig. S3 comparing *vast-tools*, rMATS, MAJIQ, and MISO. “FRACTION” shows the fraction of AS events for each type in which the PSI or ΔPSI (“MEASUREMENT_TYPE”) deviates from the ground truth < 1%, 1-5%, 5-10%, 10-25% or > 25% (“DEVIATION_FROM_TRUE_VALUE”).

**Supplemental Table S3 – PSI values from RNA-seq and RT-PCRs for all events used for validation**

Information about all the AS events used for validations from human, mouse and chicken, and corresponding PSIs from RNA-seq (as estimated in VastDB) and RT-PCR data (from the original sources). For each entry, the following information is provided: official gene symbol, VastDB event identifier, length of the alternative exon, PSI as estimated by RT-PCR and RNA-seq, associated *vast-tools* quality score, name of the VastDB sample, name of the RT-PCR (based on the original sources), PubMed ID and figure of the RT-PCR source, and species key (Hsa, human; Mmu, mouse; Gga, chicken). See <https://github.com/vastgroup/vast-tools> for further details.

**Supplemental Table S4 – PanAS events for human, mouse and chicken**

For each species, all PanAS, SwitchAS and low-frequency AS (LFAS) exons are provided. For each entry, the tables contain: official gene symbol, VastDB event identifier, coordinate of the exon, length of the exon, full set of coordinates of the event as provided by *vast-tools*, type of AltEx event as provided by *vast-tools*, number of samples in which the exon has enough read coverage (LOW or higher), percent of those samples in which the exon is alternatively spliced (10<PSI<90), average, minimum, maximum and range of PSIs. See <https://github.com/vastgroup/vast-tools> for further details.

**Supplemental Table S5 – Primer sequences used in this study**

For each event, the primer sequences as well as general information (annealing temperature, expected amplicon sizes) are provided.
