# Supplementary material for: An atlas of alternative splicing profiles and functional associations reveals new regulatory programs and genes that simultaneously express multiple major isoforms
Source: HighWire-hosted journal article supplement (doi:10.1101/gr.220962.117), 2017-08-30
Supplement: Supplemental_Table_S1.xlsx [file Supplemental_Table_S1.xlsx]

## Sheet: Human samples
Supplemental Table S1 – RNA-seq samples included in VastDB and in the present study. The first three sheets contain, for each of the species (human, mouse, and chicken), the name of the sample in VastDB, the SRA identifiers that comprise each individual sample, the tissue type to which they are averaged (if more than one of the kind) in the VastDB PSI/cRPKM plots, the tissue super-type to which t…
VastDB_sample	SRA_ID	VastDB_subgroup	VastDB_group	Length	Read_number	Source	Info
Frontal_Gyrus_old	SRR090441	Frontal_Gyrus_old	Neural	76PE	15945463	PMID: 23340839	hs, 76nt, s4, ctx
Frontal_Gyrus_old	SRR090442	Frontal_Gyrus_old	Neural	76PE	17832318	PMID: 23340839	hs, 76nt, s7, ctx
Frontal_Gyrus_old	SRR111901	Frontal_Gyrus_old	Neural	100SE	17759057	PMID: 23340839	hs, 100nt, s8 ctx
Frontal_Gyrus_old	SRR112672	Frontal_Gyrus_old	Neural	76PE	20578452	PMID: 23340839	hs, 76nt, s17, ctx
Frontal_Gyrus_old	SRR112674	Frontal_Gyrus_old	Neural	76PE	22649255	PMID: 23340839	hs, 76nt, s19, ctx
Frontal_Gyrus_young	SRR090440	Frontal_Gyrus_young	Neural	76PE	16098293	PMID: 23340839	hs, 76nt, s1, ctx
Frontal_Gyrus_young	SRR107727	Frontal_Gyrus_young	Neural	100SE	21277649	PMID: 23340839	hs, 100nt, s1, ctx
Frontal_Gyrus_young	SRR112600	Frontal_Gyrus_young	Neural	76PE	21728563	PMID: 23340839	hs, 76nt, s15, ctx
Frontal_Gyrus_young	SRR111895	Frontal_Gyrus_young	Neural	100SE	21284713	PMID: 23340839	hs, 100nt, s2 ctx
Frontal_Gyrus_young	SRR111896	Frontal_Gyrus_young	Neural	100SE	20754409	PMID: 23340839	hs, 100nt, s3 ctx
Frontal_Gyrus_young	SRR111897	Frontal_Gyrus_young	Neural	100SE	23722421	PMID: 23340839	hs, 100nt, s4, ctx
Frontal_Gyrus_young	SRR111898	Frontal_Gyrus_young	Neural	100SE	23416250	PMID: 23340839	hs, 100nt, s5 ctx
Frontal_Gyrus_young	SRR111899	Frontal_Gyrus_young	Neural	100SE	22698303	PMID: 23340839	hs, 100nt, s6, ctx
Frontal_Gyrus_young	SRR111900	Frontal_Gyrus_young	Neural	100SE	23934412	PMID: 23340839	hs, 100nt, s7, ctx
Whole_Brain_b	SRR5171092	Whole_Brain	Neural	101PE	28523713	GEO: GSM2453438	ENCODE biosample ENCBS534KWT, brain, female, 66 year, donor ENCDO691SXZ
Whole_Brain_b	SRR5171093	Whole_Brain	Neural	101PE	15674315	GEO: GSM2453439	ENCODE biosample ENCBS534KWT, brain, female, 66 year, donor ENCDO691SXZ
Whole_Brain_b	SRR3151756	Whole_Brain	Neural	101PE	45497333	GEO: GSM2055785	Brain_rep2
Whole_Brain_b	SRR3151750	Whole_Brain	Neural	101PE	25114024	GEO: GSM2055779	Brain_rep1
Sup_Temporal_Gyrus	ERR103421	Superior_Temporal_Gyrus	Neural	76SE	34762558	PMID:22558445	Non-diseased, 50 year, male, C01
Sup_Temporal_Gyrus	ERR103425	Superior_Temporal_Gyrus	Neural	76SE	13593635	PMID:22558445	Non-diseased, 38 year, male C06
Sup_Temporal_Gyrus	ERR103426	Superior_Temporal_Gyrus	Neural	76SE	34946328	PMID:22558445	Non-diseased, 73 year, male C10
Sup_Temporal_Gyrus	ERR103427	Superior_Temporal_Gyrus	Neural	75SE	33654971	PMID: 22558445	Non-diseased, 28 year, male C23
Sup_Temporal_Gyrus	ERR103428	Superior_Temporal_Gyrus	Neural	76SE	35210065	PMID: 22558445	Non-diseased, 19 year, male C25
Sup_Temporal_Gyrus	ERR103429	Superior_Temporal_Gyrus	Neural	75SE	34071888	PMID: 22558445	Non-diseased, 39 year, male C26
Cerebellum_a	SRR306844	Cerebellum	Neural	76SE	32698558	PMID: 22012392	CerebellumP, hsa cb F 1
Cerebellum_a	SRR306845	Cerebellum	Neural	76SE	23214752	PMID: 22012392	CerebellumP, hsa cb M 1
Cerebellum_a	SRR306846	Cerebellum	Neural	76SE	23540469	PMID: 22012392	CerebellumP, hsa cb M 1
Cerebellum_a	SRR111935	Cerebellum	Neural	76PE	18155186	PMID: 23340839	Cerebellum_b, hs, 76nt, s8, ctx
Cerebellum_a	SRR111936	Cerebellum	Neural	76PE	18003419	PMID: 23340839	Cerebellum_b, hs, 76nt, s11, ctx
Cerebellum_a	SRR111937	Cerebellum	Neural	76PE	16292494	PMID: 23340839	Cerebellum_b, hs, 76nt, s14, ctx
Cerebellum_a	SRR112601	Cerebellum	Neural	76PE	20161380	PMID: 23340839	Cerebellum_b, hs, 76nt, s16, ctx
Cerebellum_a	SRR112673	Cerebellum	Neural	76PE	19599926	PMID: 23340839	Cerebellum_b, hs, 76nt, s18, ctx
Cerebellum_a	SRR112675	Cerebellum	Neural	76PE	21961040	PMID: 23340839	Cerebellum_b, hs, 76nt, s20, ctx
Cerebellum_c	SRR2070736	Cerebellum	Neural	50PE	44045302	PRJNA273171	RNAseq_Cerebellum, age 29, male, isolate R1234040-10
Cerebellum_c	SRR1957125	Cerebellum	Neural	100PE	35434049	PMID: 25970244	Brain, Cerebellum RNA, pooled male and female, Clontech
Cerebellum_c	SRR1222586	Cerebellum	Neural	103PE	134837626	PRJNA244070	cerebellum, adult, Colotech
Cortex	SRR306838	Cortex	Neural	76SE	24513415	PMID: 22012392	Female 1, 42 years, frontal cortex
Cortex	SRR306839	Cortex	Neural	76SE	18850030	PMID: 22012392	Male 3, 63 years, frontal cortex
Cortex	SRR306840	Cortex	Neural	101PE	22576705	PMID: 22012392	Male 1, 68 years, prefrontal cortex
Cortex	SRR306841	Cortex	Neural	76SE	24325223	PMID: 22012392	Male 2, 48 years, prefrontal cortex
Cortex	SRR306842	Cortex	Neural	101PE	17422994	PMID: 22012392	Male 4, 56 years, prefrontal cortex
Cortex	SRR306843	Cortex	Neural	76SE	7913181	PMID: 22012392	Male 5, 24 years, temporal lobe
Cortex	NA	Cortex	Neural	49SE	45259866	http://vastdb.crg.eu/samples/Cortex_BA9_a-49.fq.gz	Endoc cortex individual 1
Cortex	NA	Cortex	Neural	49SE	99060416	http://vastdb.crg.eu/samples/Cortex_BA9_b-49.fq.gz	Endoc cortex individual 2
Cortex	NA	Cortex	Neural	49SE	92272535	http://vastdb.crg.eu/samples/Cortex_EC_a-49.fq.gz	Endoc cortex individual 3
Cortex	NA	Cortex	Neural	49SE	46995057	http://vastdb.crg.eu/samples/Cortex_EC_b-49.fq.gz	BA9 area individual 1
Cortex	NA	Cortex	Neural	49SE	99345379	http://vastdb.crg.eu/samples/Cortex_EC_c-49.fq.gz	BA9 area individual 2
Heart_a	ERR030886	Heart	Muscle	50PE	82918784	PRJEB2445	Male, 77 years, caucasian
Heart_a	ERR030894	Heart	Muscle	75SE	76766862	PRJEB2445	Male, 77 years, caucasian
Heart_a	SRR306847	Heart	Muscle	76SE	24128204	PMID: 22012392	Female 1, 57 years
Heart_a	SRR306848	Heart	Muscle	76SE	12451849	PMID: 22012392	Male 1, 29 years
Heart_a	SRR306849	Heart	Muscle	76SE	18444502	PMID: 22012392	Male 1, 29 years
Heart_a	SRR306850	Heart	Muscle	76SE	25197713	PMID: 22012392	Male 2, 73 years
Heart_b	SRR5171106	Heart	Muscle	100/102PE	50084789	GEO: GSM2453454	ENCODE biosample ENCBS227BAN, female, 30 year, donor ENCDO449QPH
Heart_b	SRR5171105	Heart	Muscle	101PE	33438516	GEO: GSM2453453	ENCODE biosample ENCBS227BAN, female, 30 year, donor ENCDO449QPH
Heart_b	SRR4421689	Heart	Muscle	101PE	156515668	GEO: GSM2343070	ENCODE biosample ENCBS044RNA, male, 34 year, healthy with polysubstance abuse, donor ENCDO058AAA
Heart_c	SRR2087326	Heart	Muscle	101PE	27646089	PMID: 26856248, GEO: GSM1808017	Heart (Left Ventricle) #1
Heart_c	SRR2087327	Heart	Muscle	101PE	26536325	PMID: 26856248, GEO: GSM1808018	Heart (Left Ventricle) #2
Heart_c	SRR2087328	Heart	Muscle	101PE	19838289	PMID: 26856248, GEO: GSM1808019	Heart (Left Ventricle) #3
Heart_c	SRR2087329	Heart	Muscle	101PE	16658218	PMID: 26856248, GEO: GSM1808020	Heart (Left Ventricle) #4
Heart_c	SRR2087330	Heart	Muscle	101PE	26042831	PMID: 26856248, GEO: GSM1808021	Heart (Left Ventricle) #5
Heart_c	SRR2087331	Heart	Muscle	101PE	46505805	PMID: 26856248, GEO: GSM1808022	Heart (Left Ventricle) #6
Heart_c	SRR2087332	Heart	Muscle	101PE	26767584	PMID: 26856248, GEO: GSM1808023	Heart (Left Ventricle) #7
Heart_c	SRR2087333	Heart	Muscle	101PE	24040256	PMID: 26856248, GEO: GSM1808024	Heart (Left Ventricle) #8
Heart_c	SRR2087334	Heart	Muscle	101PE	22161713	PMID: 26856248, GEO: GSM1808025	Heart (Left Ventricle) #9
Heart_c	SRR2087335	Heart	Muscle	101PE	28011705	PMID: 26856248, GEO: GSM1808026	Heart (Left Ventricle) #10
Muscle_b	SRR087770	Muscle	Muscle	58SE	27291626	PMID: 21317363, GEO: GSM641422	Human Skeletal Muscle Total RNA (Ambion). Sample: Muscle 1
Muscle_b	SRR087771	Muscle	Muscle	58SE	26813281	PMID: 21317363, GEO: GSM641422	Human Skeletal Muscle Total RNA (Ambion). Sample: Muscle 1
Muscle_b	SRR087772	Muscle	Muscle	58SE	28648523	PMID: 21317363, GEO: GSM641422	Human Skeletal Muscle Total RNA (Ambion). Sample: Muscle 1
Muscle_b	SRR087773	Muscle	Muscle	58SE	10137345	PMID: 21317363, GEO: GSM641423	Human Skeletal Muscle Total RNA (Ambion). Sample: Muscle 2
Muscle_b	SRR087774	Muscle	Muscle	58SE	18726750	PMID: 21317363, GEO: GSM641423	Human Skeletal Muscle Total RNA (Ambion). Sample: Muscle 2
Muscle_b	SRR087775	Muscle	Muscle	58SE	18597830	PMID: 21317363, GEO: GSM641423	Human Skeletal Muscle Total RNA (Ambion). Sample: Muscle 2
Muscle_b	SRR087776	Muscle	Muscle	58SE	19272755	PMID: 21317363, GEO: GSM641423	Human Skeletal Muscle Total RNA (Ambion). Sample: Muscle 2
Muscle_b	SRR087777	Muscle	Muscle	60SE	19254134	PMID: 21317363, GEO: GSM641424	Human Skeletal Muscle Total RNA (Ambion). Sample: Muscle 3
Muscle_b	SRR087778	Muscle	Muscle	60SE	19398795	PMID: 21317363, GEO: GSM641424	Human Skeletal Muscle Total RNA (Ambion). Sample: Muscle 3
Muscle_b	SRR087779	Muscle	Muscle	60SE	19244633	PMID: 21317363, GEO: GSM641424	Human Skeletal Muscle Total RNA (Ambion). Sample: Muscle 3
Muscle_b	SRR087780	Muscle	Muscle	60SE	19656803	PMID: 21317363, GEO: GSM641425	Human Skeletal Muscle Total RNA (Ambion). Sample: Muscle 4
Muscle_b	SRR087781	Muscle	Muscle	60SE	19400998	PMID: 21317363, GEO: GSM641425	Human Skeletal Muscle Total RNA (Ambion). Sample: Muscle 4
Muscle_b	SRR094946	Muscle	Muscle	60SE	19612251	PMID: 21317363, GEO: GSM641425	Human Skeletal Muscle Total RNA (Ambion). Sample: Muscle 4
Muscle_b	SRR094947	Muscle	Muscle	60SE	19259841	PMID: 21317363, GEO: GSM641425	Human Skeletal Muscle Total RNA (Ambion). Sample: Muscle 4
Muscle_d	ERR579149	Muscle	Muscle	101PE	19063730	PRJEB6971	skeletalmuscle_e, male, adult
Muscle_d	ERR579152	Muscle	Muscle	101PE	14977661	PRJEB6971	skeletalmuscle_b, female, adult
Muscle_d	ERR579141	Muscle	Muscle	101PE	16529934	PRJEB6971	skeletalmuscle_c, female, adult
Muscle_d	ERR579130	Muscle	Muscle	101PE	16978025	PRJEB6971	skeletalmuscle_d, female, adult
Muscle_d	ERR579142	Muscle	Muscle	101PE	28345321	PRJEB6971	skeletalmuscle_a, male, adult
Muscle_d	ERR579143	Muscle	Muscle	101PE	13105535	PRJEB6971	skeletalmuscle_a, male, adult
Muscle_d	SRR1957201	Muscle	Muscle	100PE	37803093	PMID: 25970244	Skeletal Muscle, Clontech, adult, pooled male and female
Muscle_e	SRR1398540	Muscle	Muscle	99SE	130650512	PMID: 24861551, GEO: GSM1412706	Female Control biopsy C9
Muscle_e	SRR1398539	Muscle	Muscle	99SE	130944255	PMID: 24861551, GEO: GSM1412705	Female Control biopsy C8
ESC_H1_a	SRR065492	ESC_H1	ESC	76SE	13812321	GEO: GSM572173	Myers_H1-hESC_cell_1x75D_ilNA_1, Male
ESC_H1_a	SRR065493	ESC_H1	ESC	76SE	11345402	GEO: GSM572173	Myers_H1-hESC_cell_1x75D_ilNA_1, Male
ESC_H1_a	SRR065526	ESC_H1	ESC	76SE	38819103	GEO: GSM591680	Myers_H1-hESC_cell_1x75D_ilNA_2, Male
ESC_H1_a	SRR065504	ESC_H1	ESC	75PE	24277670	GEO: GSM591658	Myers_H1-hESC_cell_2x75_200_1, Male
ESC_H1_a	SRR066678	ESC_H1	ESC	75PE	24250248	GEO: GSM591658	Myers_H1-hESC_cell_2x75_200_1, Male
ESC_H1_b	SRR031628	ESC_H1	ESC	51PE	18022135	PMID: 20944595	Non-tumor RNA sample from Embryo ICM of a human male
ESC_H1_b	SRR031629	ESC_H1	ESC	51PE	28554736	PMID: 20944595	Non-tumor RNA sample from Embryo ICM of a human male
ESC_H1_b	SRR031630	ESC_H1	ESC	51PE	28737437	PMID: 20944595	Non-tumor RNA sample from Embryo ICM of a human male
ESC_H1_b	SRR031631	ESC_H1	ESC	51PE	28800236	PMID: 20944595	Non-tumor RNA sample from Embryo ICM of a human male
ESC_H1_b	SRR031632	ESC_H1	ESC	51PE	28568772	PMID: 20944595	Non-tumor RNA sample from Embryo ICM of a human male
ESC_H1_b	SRR031633	ESC_H1	ESC	51PE	28600629	PMID: 20944595	Non-tumor RNA sample from Embryo ICM of a human male
ESC_H1_b	SRR031634	ESC_H1	ESC	51PE	28596071	PMID: 20944595	Non-tumor RNA sample from Embryo ICM of a human male
ESC_H1_b	SRR307911	ESC_H1	ESC	76PE	41419823	PMID: 25409824	CshlLong_RnaSeq_H1-hESC_cell_longPolyA
ESC_H1_b	SRR307912	ESC_H1	ESC	76PE	36877536	PMID: 25409824	CshlLong_RnaSeq_H1-hESC_cell_longPolyA
ESC_H1_b	SRR4050230	ESC_H1	ESC	101PE	118326158
ESC_H1_c	SRR488684	ESC_H1	ESC	101PE	202255240	GEO: GSM915328	H1_RNA_r1
ESC_H1_d	SRR488685	ESC_H1	ESC	101PE	211806326	GEO: GSM915329	H1_RNA_r2
ESC_H9_a	SRR345211	ESC_H9	ESC	50SE	25758784	PMID: 21924763, GEO: GSM767949	H9 hESCs, ESC_H9a
ESC_H9_a	SRR345212	ESC_H9	ESC	50SE	26738691	PMID: 21924763, GEO: GSM767949	H9 hESCs, ESC_H9a
ESC_H9_a	SRR345213	ESC_H9	ESC	50SE	26728496	PMID: 21924763, GEO: GSM767949	H9 hESCs, ESC_H9a
ESC_H9_a	SRR067388	ESC_H9	ESC	75SE	9999011	PMID: 21324177, GEO: GSM601406	H9 hESCs, ESC_H9c, GSM601406: h9_pAplus_1
ESC_H9_a	SRR067389	ESC_H9	ESC	75SE	17773975	PMID: 21324177, GEO: GSM601407	H9 hESCs, ESC_H9c, GSM601407: h9_pAplus_2
ESC_H9_a	SRR067390	ESC_H9	ESC	75SE	11573515	PMID: 21324177, GEO: GSM601408	H9 hESCs, ESC_H9c, GSM601408: h9_pAplus_3
ESC_H9_b	SRR529646	ESC_H9	ESC	100PE	73466186	PMID: 23334669. GEO: GSM978784	H9 XIST+, ESC_H9d_p
ESC_H9_b	SRR529647	ESC_H9	ESC	100PE	104925043	PMID: 23334669. GEO: GSM978785	H9 XIST-, ESC_H9d_n
iPS_a	SRR350717	iPS	iPS	104PE	134836243	PMID: 21915259, GEO: GSM808734	iPSa, iPS1-C3 day 0
iPS_a	SRR597912	iPS	iPS	100PE	221190869	PMID: 23160490 GEO: GSM1023087	RNA H1, i; Homo sapiens; RNA-Seq
iPS_b	SRR597895	iPS	iPS	99PE	223517149	PMID: 23160490, GEO: GSM1023070	RNA 03-03, i4; Homo sapiens; RNA-Seq
Placenta_Epith	SRR545685	Placenta_Epithelium	Epithelial	101PE	144785197	GEO: GSM984604	CSHL_RnaSeq_HPIEpC_cell_total (superseded by GSE78617)
Placenta_Epith	SRR545686	Placenta_Epithelium	Epithelial	101PE	169980513	GEO: GSM984604	CSHL_RnaSeq_HPIEpC_cell_total (superseded by GSE78617)
EpithelialCells	SRR545723	Epithelial_Cells	Epithelial	101PE	146844047	GEO: GSM984621	CSHL_RnaSeq_HMEpC_cell_total (superseded by GSE78616)
Skin	SRR4422571	Skin	Epithelial	101PE	52323847	GEO: GSM2344419	ENCODE biosample ENCBS432ZSQ, skin of leg, female, 53 year, donor ENCDO793LXB
Skin	SRR4421946	Skin	Epithelial	101PE	52810086	GEO: GSM2343841	ENCODE biosample ENCBS836VES, skin of leg, female, 51 year, donor ENCDO271OUW
Skin	SRR4421826	Skin	Epithelial	101PE	51908409	GEO: GSM2343729	ENCODE biosample ENCBS302SIZ, skin of leg, male, 54 year, donor ENCDO451RUA
Skin	SRR4421640	Skin	Epithelial	101PE	55790860	GEO: GSM2343564	ENCODE biosample ENCBS155WKB, skin of leg, male, 37 year, donor ENCDO845WKR
HFDPC	SRR534326	HFDPC	Precursors	101PE	163854307	GEO: GSM981258	CSHL_RnaSeq_HFDPC_cell_total (superseded by GSE78606)
HFDPC	SRR534327	HFDPC	Precursors	101PE	118574894	GEO: GSM981258	CSHL_RnaSeq_HFDPC_cell_total (superseded by GSE78606)
CL_K562	SRR521457	CL_K562	CLines	76PE	23691383	GEO: GSM958729	Caltech_RnaSeq_K562_2x75_200
CL_K562	SRR521458	CL_K562	CLines	76PE	6100265	GEO: GSM958729	Caltech_RnaSeq_K562_2x75_200
CL_K562	SRR521459	CL_K562	CLines	76PE	6422823	GEO: GSM958729	Caltech_RnaSeq_K562_2x75_200
CL_K562	SRR521460	CL_K562	CLines	76PE	43754863	GEO: GSM958729	Caltech_RnaSeq_K562_2x75_200
CL_K562	SRR521461	CL_K562	CLines	76PE	34881646	GEO: GSM958729	Caltech_RnaSeq_K562_2x75_200
CL_K562	SRR521462	CL_K562	CLines	76PE	41791045	GEO: GSM958729	Caltech_RnaSeq_K562_2x75_200
CL_K562	SRR521463	CL_K562	CLines	76PE	37394354	GEO: GSM958729	Caltech_RnaSeq_K562_2x75_200
CL_K562	SRR521464	CL_K562	CLines	76PE	12798941	GEO: GSM958729	Caltech_RnaSeq_K562_2x75_200
CL_K562	SRR521465	CL_K562	CLines	76PE	12998190	GEO: GSM958729	Caltech_RnaSeq_K562_2x75_200
CL_HeLa	SRR797056	CL_HeLa	CLines	75PE	85935538	PMID: 23739326, GEO: GSM1105745	HeLa nt_control
CL_293T	SRR797054	CL_293T	CLines	75PE	67568978	PMID: 23739326, GEO: GSM1105743	293T nt_control
CL_MB231	SRR436886	CL_MB231	CLines	76SE	120901583	PMID: 22354987	RNA-Seq, ESRP knockdown and overexpression data. Control sample
Neuroblastoma	SRR315315	Neuroblastoma	CLines	76PE	40386822	GEO: GSM765395	CshlLong_RnaSeq_SK-N-SH_RA_cell_longPolyA
Neuroblastoma	SRR315316	Neuroblastoma	CLines	76PE	38607054	GEO: GSM765395	CshlLong_RnaSeq_SK-N-SH_RA_cell_longPolyA
Melanocytes	SRR545714	Melanocytes	Tissues	101PE	145680982	GEO: GSM984616	Epidermal Melanocytes from two individuals, NHEM
Fibroblasts	SRR309267	Fibroblasts	Cells	76-64PE	44702551	PMID: 21890647, GEO: GSM759890	RNA-Seq Lung Fibroblasts batch1, sample 1
Fibroblasts	SRR309268	Fibroblasts	Cells	76-64PE	44370631	PMID: 21890647, GEO: GSM759891	RNA-Seq Lung Fibroblasts batch1, sample 2
Fibroblasts	SRR309269	Fibroblasts	Cells	76PE	24363552	PMID: 21890647, GEO: GSM759891	RNA-Seq Foreskin Fibroblasts
Fibroblasts	SRR309270	Fibroblasts	Cells	76PE	32483927	PMID: 21890647, GEO: GSM759893	RNA-Seq Lung Fibroblasts batch 3
Fibroblasts	NA	Fibroblasts	Cells	50SE	74425865	http://vastdb.crg.eu/samples/Fibr2a-50.fq.gz	Fibroblasts
Fibroblasts	NA	Fibroblasts	Cells	50SE	37044259	http://vastdb.crg.eu/samples/Fibr2b-50.fq.gz	Fibroblasts
Breast_a	ERR030883	Breast	Tissues	50PE	75862215	PRJEB2445	Caucasian, 29 years, female, HCT20161
Breast_a	ERR030891	Breast	Tissues	75SE	77195260	PRJEB2445	Caucasian, 29 years, female, HCT20161
Breast_a	SRR787272	Breast	Tissues	101PE	37094134	GEO: GSM1101968	Breast (Biochain:R-1234086-P)
Adipose_b	SRR5171082	Adipose	Tissues	101PE	34014252	GEO: GSM2453430	ENCODE biosample ENCBS116JOH, adipose tissue, female, 63 year, donor ENCDO828UYN
Adipose_b	SRR5171083	Adipose	Tissues	100/102PE?	21851075	GEO: GSM2453431	ENCODE biosample ENCBS116JOH, adipose tissue, female, 63 year, donor ENCDO828UYN
Adipose_b	SRR4422184	Adipose	Tissues	101PE	45818006	GEO: GSM2344057	ENCODE biosample ENCBS171DKK, subcutaneous adipose tissue, male, 37 year, donor ENCDO845WKR
Adipose_b	SRR4422144	Adipose	Tissues	101PE	52002764	GEO: GSM2344003	ENCODE biosample ENCBS183IBX, subcutaneous adipose tissue, male, 54 year, donor ENCDO451RUA
Adipose_b	SRR4421875	Adipose	Tissues	101PE	54739738	GEO: GSM2343775	ENCODE biosample ENCBS280PMM, subcutaneous adipose tissue, female, 53 year, donor ENCDO793LXB
Adipose_b	SRR4421395	Adipose	Tissues	101PE	47283476	GEO: GSM2343284	ENCODE biosample ENCBS606FXX, subcutaneous adipose tissue, female, 51 year, donor ENCDO271OUW
Adipose_c	SRR2087351	Adipose	Tissues	101PE	27976603	GEO: GSM1808042, PMID: 26856248	Adipose (subcutaneous), Adipose_1
Adipose_c	SRR2087352	Adipose	Tissues	101PE	28342618	GEO: GSM1808043 ,PMID: 26856248	Adipose (subcutaneous), Adipose_2
Adipose_c	SRR2087353	Adipose	Tissues	101PE	16418818	GEO: GSM1808044, PMID: 26856248	Adipose (subcutaneous), Adipose_3
Adipose_c	SRR2087354	Adipose	Tissues	101PE	25902178	GEO: GSM1808045, PMID: 26856248	Adipose (subcutaneous), Adipose_4
Adipose_c	SRR2087355	Adipose	Tissues	101PE	30101618	GEO: GSM1808046, PMID: 26856248	Adipose (subcutaneous), Adipose_5
Adipose_c	SRR2087356	Adipose	Tissues	101PE	30530207	GEO: GSM1808047, PMID: 26856248	Adipose (subcutaneous), Adipose_6
Adipose_c	SRR2087357	Adipose	Tissues	101PE	26461800	GEO: GSM1808048, PMID: 26856248	Adipose (subcutaneous), Adipose_7
Adipose_c	SRR2087358	Adipose	Tissues	101PE	18758296	GEO: GSM1808049, PMID: 26856248	Adipose (subcutaneous), Adipose_8
Adipose_c	SRR2087359	Adipose	Tissues	101PE	21440633	GEO: GSM1808050, PMID: 26856248	Adipose (subcutaneous), Adipose_9
Adipose_c	SRR2087360	Adipose	Tissues	101PE	22176958	GEO: GSM1808051, PMID: 26856248	Adipose (subcutaneous), Adipose_10
Adipose_d	ERR579146	Adipose	Tissues	101PE	46627373	PRJEB6971	fat_8a, female
Adipose_d	ERR579122	Adipose	Tissues	101PE	37368054	PRJEB6971	fat_8b, female
Breast_Epith_a	SRR4422692	Breast_Epithelium	Epithelial	101PE	75942940	GEO: GSM2343212	ENCODE biosample ENCBS453ISE, breast epithelium, male, 37 year, donor ENCDO845WKR
Breast_Epith_a	SRR4421790	Breast_Epithelium	Epithelial	101PE	75872530	GEO: GSM2343705	ENCODE biosample ENCBS160KYO, breast epithelium, female, 51 year, donor ENCDO271OUW
Breast_Epith_a	SRR4421786	Breast_Epithelium	Epithelial	101PE	72409714	GEO: GSM2343701	ENCODE biosample ENCBS490RBH, breast epithelium, female, 53 year, donor ENCDO793LXB
HMEpC_a	SRR3192543	Breast_Epithelium	Epithelial	101PE	146844047	GEO: GSM2072478	Mammary Epithelial Cells (HMEpC): ENCODE biosample ENCBS456ENC, mammary epithelial cells, female, 23 year, donor ENCDO131AAA, passage 2
HMEpC_a	SRR3192494	Breast_Epithelium	Epithelial	76PE	101735501	GEO: GSM2072441	ENCODE biosample ENCBS456ENC, mammary epithelial cells, female, unknown age, donor ENCDO131AAA
HMEpC_a	SRR3192473	Breast_Epithelium	Epithelial	76PE	127102436	GEO: GSM2072420	ENCODE biosample ENCBS552ENC, mammary epithelial cells, female, unknown age, donor ENCDO131AAA
Adrenal_b	SRR4421552	Adrenal	Tissues	101SE?	44433888	GEO: GSM2343489	ENCODE biosample ENCBS006KAW; 53 year, female
Adrenal_b	SRR4422204	Adrenal	Tissues	101PE	58274466	GEO: GSM2344105	ENCODE biosample ENCBS006KAW; 53 year, female
Adrenal_b	SRR1182119	Adrenal	Tissues	97PE	13937518	PRJNA237340	Around 25 years, male
Adrenal_c	SRR1957124	Adrenal	Tissues	101PE	37921663	PRJNA280600	Mixture of adult RNA from male and female (Clontech)
Adrenal_c	ERR315392	Adrenal	Tissues	101PE	8998315	PRJEB4337 (PMID: 24309898)	Homo sapiens; adrenal_4c, individual V121
Adrenal_c	ERR315452	Adrenal	Tissues	101PE	10241792	PRJEB4337 (PMID: 24309898)	Homo sapiens; adrenal_4a, individual V119
Adrenal_c	ERR315450	Adrenal	Tissues	101PE	9087841	PRJEB4337 (PMID: 24309898)	Homo sapiens; adrenal_4c, individual V121
Adrenal_c	ERR315335	Adrenal	Tissues	101PE	10145563	PRJEB4337 (PMID: 24309898)	Homo sapiens; adrenal_4a, individual V119
Adrenal_c	ERR315385	Adrenal	Tissues	101PE	10929920	PRJEB4337 (PMID: 24309898)	Homo sapiens; adrenal_4d, individual V122
Adrenal_c	ERR315417	Adrenal	Tissues	101PE	11003477	PRJEB4337 (PMID: 24309898)	Homo sapiens; adrenal_4d, individual V122
Amnion	SRR635193	Amnion	Placental	54PE	27265881	PMID: 22448651	pooled amnion from 5 pooled placentas with term (≥ 37 weeks of gestation) deliveries with spontaneous onset of labor
Amnion	SRR638932	Amnion	Placental	72PE	23328863	PMID: 22448651	pooled amnion from 5 pooled placentas with term (≥ 37 weeks of gestation) deliveries with spontaneous onset of labor
Chorion	SRR638936	Chorion	Placental	72PE	29852422	PMID: 22448651	pooled chorion from 5 pooled placentas with term (≥ 37 weeks of gestation) deliveries with spontaneous onset of labor
Chorion	SRR638941	Chorion	Placental	54PE	30572627	PMID: 22448651	pooled chorion from 5 pooled placentas with term (≥ 37 weeks of gestation) deliveries with spontaneous onset of labor
Colon_sigmoid	SRR5171091	Colon	Digestive_tract	101PE	29918829	GEO: GSM2453437	ENCODE biosample ENCBS511JYL, sigmoid colon, donor ENCDO637AUB, 21 year male, polyA
Colon_sigmoid	SRR5171090	Colon	Digestive_tract	101PE	41887084	GEO: GSM2453436	ENCODE biosample ENCBS511JYL, sigmoid colon, donor ENCDO637AUB, 21 year male, polyA
Colon_sigmoid	SRR4422147	Colon	Digestive_tract	101PE	61623646	GEO: GSM2343980	ENCODE biosample ENCBS767MGS, sigmoid colon, donor ENCDO845WKR, 37 year male
Colon_sigmoid	SRR4422379	Colon	Digestive_tract	101PE	42197599	GEO: GSM2344258	ENCODE biosample ENCBS516KIQ, sigmoid colon, donor ENCDO845WKR, 37 year male
Colon_sigmoid	SRR4422344	Colon	Digestive_tract	101PE	40803725	GEO: GSM2344212	ENCODE biosample ENCBS214FDP, sigmoid colon, donor ENCDO271OUW, 51 year female
Colon_sigmoid	SRR4421313	Colon	Digestive_tract	101PE	44372752	GEO: GSM2343211	ENCODE biosample ENCBS581JIS, sigmoid colon, donor ENCDO793LXB, 53 year female
Colon_transverse	SRR4422293	Colon	Digestive_tract	101PE	78489699	GEO: GSM2344169	ENCODE biosample ENCBS974EYF, transverse colon, donor ENCDO793LXB, 53 year female
Colon_transverse	SRR4421756	Colon	Digestive_tract	101PE	74822941	GEO: GSM2343672	ENCODE biosample ENCBS999VTF, transverse colon, donor ENCDO271OUW, 51 year female
Colon_transverse	SRR4422057	Colon	Digestive_tract	101PE	74308778	GEO: GSM2343949	ENCODE biosample ENCBS668MJW, transverse colon, donor ENCDO451RUA, 54 year male
Colon_b	SRR3405458	Colon	Digestive_tract	100PE	17817650	GEO: GSM2127806, PMID: 27681425	Intestine and colon, normal, pool#3 (n=5 donors)
Colon_b	SRR3405457	Colon	Digestive_tract	100PE	20389325	GEO: GSM2127805, PMID: 27681425	Intestine and colon, normal, pool#2 (n=5 donors)
Colon_b	SRR3405456	Colon	Digestive_tract	100PE	9011954	GEO: GSM2127804, PMID: 27681425	Intestine and colon, normal, pool#1 (n=5 donors)
Colon_b	SRR3151751	Colon	Digestive_tract	101PE	26986757	GEO: GSM2055780, PMID: 27050392	Colon_rep1
Colon_b	SRR3151757	Colon	Digestive_tract	101PE	24383371	GEO: GSM2055786, PMID: 27050392	Colon_rep2
Decidua	SRR638937	Decidua	Placental	72PE	25393875	PMID: 22448651	decidua from 5 pooled placentas with term (≥ 37 weeks of gestation) deliveries with spontaneous onset of labor
Decidua	SRR638939	Decidua	Placental	54PE	32668147	PMID: 22448651	decidua from 5 pooled placentas with term (≥ 37 weeks of gestation) deliveries with spontaneous onset of labor
EndothCells	SRR309129	Endothelium	Tissues	74SE	32424387	PMID:25640180, 21946353, GEO: GSM761685	Endometrial stromal cells (ESC)
EndothCells	SRR309128	Endothelium	Tissues	74SE	33329086	PMID:25640180, 21946353, GEO: GSM761684	Endometrial stromal cells (ESC)
EndomStromCells	SRR309129	Endometrium	Tissues	74SE	32424387	PMID:25640180, 21946353, GEO: GSM761685	Endometrial stromal cells (ESC)
EndomStromCells	SRR309128	Endometrium	Tissues	74SE	33329086	PMID:25640180, 21946353, GEO: GSM761684	Endometrial stromal cells (ESC)
EndothCells	SRR545718	Endothelium	Tissues	101PE	177823848	GEO: GSM984618	CSHL_RnaSeq_HAoEC_cell_total
EndothCells	SRR545707	Endothelium	Tissues	101PE	132793805	GEO: GSM984613	CSHL_RnaSeq_HSaVEC_cell_total
GLS_Cells	SRR577579	GLS_Cells	Cells	100PE	28646397	PMID: 21289626, GEO: GSM1010946	Lung_cells, STL002, Caucasian, female, 30 years, iron deficiency, bipolar disease
GLS_Cells	SRR577580	GLS_Cells	Cells	100PE	28692937	PMID: 21289626, GEO: GSM1010946	Lung_cells, STL002, Caucasian, female, 30 years, iron deficiency, bipolar disease
GLS_Cells	SRR577581	GLS_Cells	Cells	100PE	25913247	PMID: 21289626, GEO: GSM1010946	Lung_cells, STL002, Caucasian, female, 30 years, iron deficiency, bipolar disease
GLS_Cells	SRR577582	GLS_Cells	Cells	100PE	23823451	PMID: 21289626, GEO: GSM1010946	Lung_cells, STL002, Caucasian, female, 30 years, iron deficiency, bipolar disease
GLS_Cells	SRR577583	GLS_Cells	Cells	100PE	27635071	PMID: 21289626, GEO: GSM1010960	Gastric_cells, STL003, Caucasian, male, 34 years, polysubstance abuse
GLS_Cells	SRR577584	GLS_Cells	Cells	100PE	27729360	PMID: 21289626, GEO: GSM1010960	Gastric_cells, STL003, Caucasian, male, 34 years, polysubstance abuse
GLS_Cells	SRR577585	GLS_Cells	Cells	100PE	26062675	PMID: 21289626, GEO: GSM1010960	Gastric_cells, STL003, Caucasian, male, 34 years, polysubstance abuse
GLS_Cells	SRR577586	GLS_Cells	Cells	100PE	24681157	PMID: 21289626, GEO: GSM1010960	Gastric_cells, STL003, Caucasian, male, 34 years, polysubstance abuse
GLS_Cells	SRR577599	GLS_Cells	Cells	100PE	29636056	PMID: 21289626, GEO: GSM1010976	Spleen_cells, STL003, Caucasian, male, 34 years, polysubstance abuse
GLS_Cells	SRR577600	GLS_Cells	Cells	100PE	29631975	PMID: 21289626, GEO: GSM1010976	Spleen_cells, STL003, Caucasian, male, 34 years, polysubstance abuse
GLS_Cells	SRR577601	GLS_Cells	Cells	100PE	26788444	PMID: 21289626, GEO: GSM1010976	Spleen_cells, STL003, Caucasian, male, 34 years, polysubstance abuse
GLS_Cells	SRR577602	GLS_Cells	Cells	100PE	24615625	PMID: 21289626, GEO: GSM1010976	Spleen_cells, STL003, Caucasian, male, 34 years, polysubstance abuse
Kidney_b	SRR306851	Kidney	Tissues	76SE	22493518	PMID: 22012392, GEO: GSM752702	hsa kd F 1
Kidney_b	SRR306852	Kidney	Tissues	76SE	20684752	PMID: 22012392, GEO: GSM752703	hsa kd M 1
Kidney_b	SRR306853	Kidney	Tissues	76SE	31386619	PMID: 22012392, GEO: GSM752704	hsa kd M 2
Kidney_b	SRR3405452	Kidney	Tissues	100PE	14638224	PMID: 27681425, GEO: GSM2127800	Kidney, normal, pool#3 (n=3 donors), pooled male and female
Kidney_b	SRR3405451	Kidney	Tissues	100PE	29820507	PMID: 27681425, GEO: GSM2127799	Kidney, normal, pool#2 (n=3 donors), pooled male and female
Kidney_b	SRR3405450	Kidney	Tissues	100PE	8702725	PMID: 27681425, GEO: GSM2127798	Kidney, normal, pool#1 (n=3 donors), pooled male and female
Kidney_b	SRR2919508	Kidney	Tissues	101PE	45053148	PMID: 27816064, GEO: GSE75061	Kidney, 3 years, male, Control-Kidney-RNA
Kidney_b	SRR2064425	Kidney	Tissues	51SE	15506913	PMID: 26878238, GEO: GSM1712826	Kidney normal tissue 2 RNAseq
Kidney_b	SRR2064424	Kidney	Tissues	51SE	19254252	PMID: 26878238, GEO: GSM1712825	Kidney normal tissue 1 RNAseq
Kidney_c	SRR2087306	Kidney	Tissues	101PE	21827896	PMID: 26856248, GEO: GSM1807997	Kidney (Cortex), #1
Kidney_c	SRR2087307	Kidney	Tissues	101PE	22050113	PMID: 26856248, GEO: GSM1807998	Kidney (Cortex), #3
Kidney_c	SRR2087308	Kidney	Tissues	101PE	10318824	PMID: 26856248, GEO: GSM1807999	Kidney (Cortex), #5
Kidney_c	SRR2087309	Kidney	Tissues	101PE	18669716	PMID: 26856248, GEO: GSM1808000	Kidney (Cortex), #6
Kidney_c	SRR2087310	Kidney	Tissues	101PE	12801292	PMID: 26856248, GEO: GSM1808001	Kidney (Cortex), #7
Kidney_c	SRR2087311	Kidney	Tissues	101PE	12120129	PMID: 26856248, GEO: GSM1808002	Kidney (Cortex), #9
Kidney_c	SRR2087312	Kidney	Tissues	101PE	25207008	PMID: 26856248, GEO: GSM1808003	Kidney (Cortex), #10
Kidney_c	SRR2087313	Kidney	Tissues	101PE	30890481	PMID: 26856248, GEO: GSM1808004	Kidney (Cortex), #11
Kidney_c	SRR2087314	Kidney	Tissues	101PE	20883522	PMID: 26856248, GEO: GSM1808005	Kidney (Cortex), #13
Kidney_c	SRR2087315	Kidney	Tissues	101PE	19529102	PMID: 26856248, GEO: GSM1808006	Kidney (Cortex), #17
Kidney_d	SRR2014240	Kidney	Tissues	76PE	80053022	PRJNA283012	Biochain_Adult_Kidney, 26 years, male
Kidney_d	SRR2014239	Kidney	Tissues	76PE	92807528	PRJNA283012	Agilent_Adult_Kidney, 76 years, female
Liver_a	SRR306854	Liver	Tissues	76SE	16391552	PMID: 22012392, GEO: GSM752705	hsa lv M 1
Liver_a	SRR306855	Liver	Tissues	76SE	26755509	PMID: 22012392, GEO: GSM752705	hsa lv M 1
Liver_a	SRR306856	Liver	Tissues	76SE	23866499	PMID: 22012392, GEO: GSM752706	hsa lv M 2
Liver_a	SRR087756	Liver	Tissues	58SE	25814455	PMID: 21317363, GEO: GSM641418	Liver1, Human Liver Total RNA (Ambion)
Liver_a	SRR087757	Liver	Tissues	58SE	25534868	PMID: 21317363, GEO: GSM641418	Liver1, Human Liver Total RNA (Ambion)
Liver_a	SRR087758	Liver	Tissues	58SE	23661941	PMID: 21317363, GEO: GSM641418	Liver1, Human Liver Total RNA (Ambion)
Liver_a	SRR087763	Liver	Tissues	58SE	13224622	PMID: 21317363, GEO: GSM641420	liver3, Human Liver Total RNA (Ambion)
Liver_a	SRR087764	Liver	Tissues	58SE	19486468	PMID: 21317363, GEO: GSM641420	liver3, Human Liver Total RNA (Ambion)
Liver_a	SRR087765	Liver	Tissues	58SE	19154017	PMID: 21317363, GEO: GSM641420	liver3, Human Liver Total RNA (Ambion)
Liver_a	SRR087766	Liver	Tissues	58SE	20794323	PMID: 21317363, GEO: GSM641421	liver4, Human Liver Total RNA (Ambion)
Liver_a	SRR087767	Liver	Tissues	58SE	20372877	PMID: 21317363, GEO: GSM641421	liver4, Human Liver Total RNA (Ambion)
Liver_a	SRR087768	Liver	Tissues	58SE	20631095	PMID: 21317363, GEO: GSM641421	liver4, Human Liver Total RNA (Ambion)
Liver_a	SRR087769	Liver	Tissues	58SE	20539505	PMID: 21317363, GEO: GSM641421	liver4, Human Liver Total RNA (Ambion)
Liver_b	SRR3192419	Liver	Tissues	101PE	171397834	GEO: GSM2072373	ENCODE biosample ENCBS045RNA, female, 6 years, donor ENCDO059AAA, healthy
Liver_b	SRR4421737	Liver	Tissues	100SE	23840741	GEO: GSM2343657	ENCODE biosample ENCBS046RNA, male, 32 years, donor ENCDO060AAA, healthy with non-obstructive coronary artery disease
Liver_b	SRR4421738	Liver	Tissues	100SE	23415911	GEO: GSM2343657	ENCODE biosample ENCBS046RNA, male, 32 years, donor ENCDO060AAA, healthy with non-obstructive coronary artery disease
Liver_b	SRR4421735	Liver	Tissues	100SE	28864378	GEO: GSM2343656	ENCODE biosample ENCBS401URL, female 4 years, donor ENCDO882MMZ, healthy
Liver_b	SRR4421736	Liver	Tissues	100SE	29225060	GEO: GSM2343656	ENCODE biosample ENCBS401URL, female 4 years, donor ENCDO882MMZ, healthy
Liver_c	SRR3405449	Liver	Tissues	100PE	24652314	PMID: 27681425, GEO: GSM2127797	Liver, normal, pool#3 (n=3 donors), pooled male and female
Liver_c	SRR3405448	Liver	Tissues	100PE	17307545	PMID: 27681425, GEO: GSM2127796	Liver, normal, pool#2 (n=3 donors), pooled male and female
Liver_c	SRR3405447	Liver	Tissues	100PE	24314927	PMID: 27681425, GEO: GSM2127795	Liver, normal, pool#1 (n=3 donors), pooled male and female
Liver_c	SRR5138444	Liver	Tissues	101PE	36103159	PRJNA354977	Non-tumor liver Replicate 2
Liver_c	SRR5138443	Liver	Tissues	101PE	37747121	PRJNA354977	Non-tumor liver tissue
Lung_b	SRR5171075	Lung	Tissues	100/102PE?	18971601	GEO: GSM2453423	ENCODE biosample ENCBS973FZI, Homo sapiens lung tissue female adult, donor ENCDO449QPH, female 30 year, polyA
Lung_b	SRR5171074	Lung	Tissues	101PE	24893990	GEO: GSM2453422	ENCODE biosample ENCBS973FZI, Homo sapiens lung tissue female adult, donor ENCDO449QPH, female 30 year, polyA
Lung_b	SRR4422346	Lung	Tissues	101PE	44911983	GEO: GSM2344225	ENCODE biosample ENCBS271JIM, Homo sapiens upper lobe of left lung tissue male adult, donor ENCDO451RUA, male 54 year
Lung_b	SRR3151760	Lung	Tissues	101PE	31223684	GEO: GSM2055789	Lung_rep2
Lung_b	SRR3151754	Lung	Tissues	101PE	30325936	GEO: GSM2055783	Lung_rep1
Lung_e	SRR5120922	Lung	Tissues	101PE	27489377	PMID: 28230051,GEO: GSM2433118	s_191307
Lung_e	SRR5120923	Lung	Tissues	101PE	53334716	PMID: 28230051,GEO: GSM2433119	s_269070
Lung_e	SRR5120924	Lung	Tissues	101PE	52403585	PMID: 28230051,GEO: GSM2433120	s_164046
Lung_e	SRR5120925	Lung	Tissues	101PE	47636923	PMID: 28230051,GEO: GSM2433121	s_046027
Lung_e	SRR5120926	Lung	Tissues	101PE	68336031	PMID: 28230051,GEO: GSM2433122	s_058471
Lung_e	SRR5120927	Lung	Tissues	101PE	41633285	PMID: 28230051,GEO: GSM2433123	s_138327
Lung_f	SRR3588666	Lung	Tissues	150PE	40704412	PRJNA323394	Control 1
Lung_f	SRR3588667	Lung	Tissues	150PE	40597026	PRJNA323394	Control 2
Lung_f	SRR3588668	Lung	Tissues	150PE	38645596	PRJNA323394	Control 3
Lung_f	SRR3588669	Lung	Tissues	150PE	25744823	PRJNA323394	Control 4
Lung_f	SRR3588705	Lung	Tissues	150PE	25343003	PRJNA323394	Control 5
Lung_f	SRR3588706	Lung	Tissues	150PE	27083561	PRJNA323394	Control 6
Lymph_node_b	SRR5273609	Lymph_Node	Immune_hematopoiesis	101PE	33525046	PMID: 27835906	Jong-il Kim, F1_RNAseq, age 54, female
Lymph_node_b	SRR5273607	Lymph_Node	Immune_hematopoiesis	101PE	33481951	PMID: 27835906	Jong-il Kim, F5_RNAseq, age 50, female
Lymph_node_b	SRR5273605	Lymph_Node	Immune_hematopoiesis	101PE	29439011	PMID: 27835906	Jong-il Kim, S1_RNAseq, age 42, female
Lymph_node_b	SRR5273599	Lymph_Node	Immune_hematopoiesis	101PE	39950849	PMID: 27835906	Jong-il Kim, S7_RNAseq, age 58, male
Lymph_node_b	SRR5273600	Lymph_Node	Immune_hematopoiesis	101PE	37039919	PMID: 27835906	Jong-il Kim, S6_RNAseq, age 39, male
Lymph_node_b	SRR1057524	Lymph_Node	Immune_hematopoiesis	50SE	33434672	PMID: 24627810, GEO: GSM1296624	Lymph node
Lymph_node_c	SRR5273601	Lymph_Node	Immune_hematopoiesis	101PE	33909822	PMID: 27835906	Jong-il Kim, S5_RNAseq, age 53, male
Lymph_node_c	SRR5273602	Lymph_Node	Immune_hematopoiesis	101PE	37291356	PMID: 27835906	Jong-il Kim, S4_RNAseq, age 63, male
Lymph_node_c	SRR5273603	Lymph_Node	Immune_hematopoiesis	101PE	34938110	PMID: 27835906	Jong-il Kim, S3_RNAseq, age 66, male
Lymph_node_c	SRR5273604	Lymph_Node	Immune_hematopoiesis	101PE	33007769	PMID: 27835906	Jong-il Kim, S2_RNAseq, age 71, male
Lymph_node_c	SRR5273606	Lymph_Node	Immune_hematopoiesis	101PE	18220056	PMID: 27835906	Jong-il Kim, F6_RNAseq, age 53, male
Lymph_node_c	SRR5273608	Lymph_Node	Immune_hematopoiesis	101PE	49665522	PMID: 27835906	Jong-il Kim, F2_RNAseq, age 40, male
Ovary_a	ERR030874	Ovary	Tissue	50PE	80946260	PRJEB2445	Caucasian, 47 years, female, HCT20150
Ovary_a	ERR030901	Ovary	Tissue	75SE	81,003,052	PRJEB2445	Caucasian, 47 years, female, HCT20150
Ovary_b	SRR1258865	Ovary	Ovary	58SE	35312270	PRJNA244452	Caucasian, 47 years, female (Ambion)
Ovary_b	SRR943341	Ovary	Ovary	101SE	31197675	PMID: 24463510, GEO: GSM1196045	Female, pool of individuals, hsa ov F 3
Ovary_b	SRR649364	Ovary	Ovary	101SE	39001717	PMID: 24463510, GEO: GSM1064829	Female, 47 years, hsa ov F1
Ovary_b	SRR787279	Ovary	Ovary	101PE	48061990	PMID: 24344320, GEO: GSM1101975	Biochain:R-1234183-P
Ovary_b	ERR315482	Ovary	Ovary	101PE	15110219	PMID: 24309898	Homo sapiens; ovary_6a, individual V233
Ovary_b	ERR315380	Ovary	Ovary	101PE	15403247	PMID: 24309898	Homo sapiens; ovary_6a, individual V233
Ovary_b	ERR315458	Ovary	Ovary	101PE	16068834	PMID: 24309898	Homo sapiens; ovary_6b, individual V234
Ovary_b	ERR315402	Ovary	Ovary	101PE	15764627	PMID: 24309898	Homo sapiens; ovary_6b, individual V234
Placenta_a	SRR309266	Placenta	Placental	76PE	30024380	PMID: 21890647, GEO: GSM759889	Placental tissue purchased from Ambion
Placenta_a	SRR5217261	Placenta	Placental	100SE	27750985	PRJNA326064	Female, isolate 14, 39 weeks
Placenta_a	SRR5217260	Placenta	Placental	100SE	20537685	PRJNA326064	Female, isolate 12, 37 weeks
Placenta_a	SRR5217259	Placenta	Placental	100SE	26493951	PRJNA326064	Female, isolate 9, 36 weeks
Placenta_a	SRR5217258	Placenta	Placental	100SE	44777519	PRJNA326064	Male, isolate 3, 41 weeks
Placenta_b	SRR5138013	Placenta	Placental	50SE	30936805	PRJNA358255	Male, isolate 22027, Marsit, term placenta
Placenta_b	SRR5138012	Placenta	Placental	50SE	34098292	PRJNA358255	Female, isolate 21043, Marsit, term placenta
Placenta_b	SRR5138011	Placenta	Placental	50SE	31536304	PRJNA358255	Male, isolate 21341, Marsit, term placenta
Placenta_b	SRR5138010	Placenta	Placental	50SE	45217624	PRJNA358255	Female, isolate 21146, Marsit, term placenta
Placenta_b	SRR5138009	Placenta	Placental	50SE	39649744	PRJNA358255	Female, isolate 21814, Marsit, term placenta
Placenta_b	SRR5138008	Placenta	Placental	50SE	42631543	PRJNA358255	Female, isolate 21783, Marsit, term placenta
Placenta_b	SRR5138007	Placenta	Placental	50SE	33347256	PRJNA358255	Female, isolate 21536, Marsit, term placenta
Placenta_c	SRR3096661	Placenta	Placental	125PE	39529024	PRJNA308450	CJM_RICHS_placenta-CJM19, Term placenta, male
Placenta_c	SRR3096660	Placenta	Placental	125PE	35827217	PRJNA308450	CJM_RICHS_placenta-CJM18, Term placenta, female
Placenta_c	SRR3096659	Placenta	Placental	125PE	40128814	PRJNA308450	CJM_RICHS_placenta-CJM17, Term placenta, male
Placenta_c	SRR3096657	Placenta	Placental	125PE	40940073	PRJNA308450	CJM_RICHS_placenta-CJM16, Term placenta, female
Placenta_c	SRR3096656	Placenta	Placental	125PE	39304452	PRJNA308450	CJM_RICHS_placenta-CJM15, Term placenta, male
Placenta_c	SRR3096655	Placenta	Placental	125PE	37895806	PRJNA308450	CJM_RICHS_placenta-CJM14, Term placenta, female
Placenta_c	SRR3096654	Placenta	Placental	125PE	40117973	PRJNA308450	CJM_RICHS_placenta-CJM13, Term placenta, male
Placenta_c	SRR3096653	Placenta	Placental	125PE	41983229	PRJNA308450	CJM_RICHS_placenta-CJM12, Term placenta, female
Prostate_b	SRR4422158	Prostate	Tissues	101PE	66053422	GEO: GSM2344053	ENCODE biosample ENCBS291PVP, 54 year, donor ENCDO451RUA
Prostate_b	SRR4421868	Prostate	Tissues	101PE	38589731	GEO: GSM2343767	ENCODE biosample ENCBS656EUB, 37 year, donor ENCDO845WKR
Prostate_b	SRR1957198	Prostate	Tissues	101PE	34383909	PMID: 25970244	mixture, Clontech, adult
Prostate_c	SRR1576182	Prostate	Tissues	101PE	31616019	PMID: 25751143, GEO: GSM1505607	Prostate RUN2 L007
Prostate_c	SRR1576157	Prostate	Tissues	101PE	33968428	PMID: 25751143, GEO: GSM1505582	Prostate RUN1 L008
Prostate_c	ERR315359	Prostate	Tissues	101PE	10889038	PMID: 24309898	Homo sapiens; prostate_4a, individual V127
Prostate_c	ERR315330	Prostate	Tissues	101PE	10838240	PMID: 24309898	Homo sapiens; prostate_4a, individual V127
Prostate_c	ERR315365	Prostate	Tissues	101PE	8893985	PMID: 24309898	Homo sapiens; prostate_4c, individual V129
Prostate_c	ERR315354	Prostate	Tissues	101PE	8841120	PMID: 24309898	Homo sapiens; prostate_4c, individual V129
Prostate_c	ERR315410	Prostate	Tissues	101PE	16837081	PMID: 24309898	Homo sapiens; prostate_a, individual V12
Prostate_c	ERR315407	Prostate	Tissues	101PE	10873741	PMID: 24309898	Homo sapiens; prostate_4b, individual V128
Prostate_c	ERR315340	Prostate	Tissues	101PE	10783008	PMID: 24309898	Homo sapiens; prostate_4b, individual V128
Prostate_d	SRR1054292	Prostate	Tissues	50PE	17726303	PMID: 24593312, GEO: GSM1293750	428
Prostate_d	SRR1054291	Prostate	Tissues	50PE	54107585	PMID: 24593312, GEO: GSM1293749	330
Prostate_d	SRR1054290	Prostate	Tissues	50PE	75448879	PMID: 24593312, GEO: GSM1293748	321
Prostate_d	SRR1054289	Prostate	Tissues	50PE	14118423	PMID: 24593312, GEO: GSM1293747	306
Prostate_d	SRR1054288	Prostate	Tissues	50PE	31246071	PMID: 24593312, GEO: GSM1293746	197
Prostate_d	SRR1054287	Prostate	Tissues	50PE	60601969	PMID: 24593312, GEO: GSM1293745	145
Prostate_d	SRR1054286	Prostate	Tissues	50PE	36472720	PMID: 24593312, GEO: GSM1293744	1107
Prostate_d	SRR1054285	Prostate	Tissues	50PE	29776097	PMID: 24593312, GEO: GSM1293743	1073
Prostate_d	SRR1054284	Prostate	Tissues	50PE	19908514	PMID: 24593312, GEO: GSM1293742	1067
Prostate_d	SRR1054283	Prostate	Tissues	50PE	39276443	PMID: 24593312, GEO: GSM1293741	1014
Testis_a	ERR030873	Testis	Testis	50PE	81836199	PRJEB2445	Caucasian, male, 19 years, HCT20151
Testis_a	ERR030902	Testis	Testis	75SE	82044319	PRJEB2445	Caucasian, male, 19 years, HCT20151
Testis_a	SRR306857	Testis	Testis	76PE	9224054	PMID: 22012392, GEO: GSM752707	hsa ts M 1
Testis_a	SRR306858	Testis	Testis	76PE	32444809	PMID: 22012392,GEO: GSM752708	hsa ts M 2
Testis_a	SRR649362	Testis	Testis	75SE	40098100	PMID: 24463510, GEO: GSM1064826	hsa ts M3
Testis_b	SRR4421667	Testis	Testis	101PE	26708995	GEO: GSM2343589	ENCODE biosample ENCBS255MJZ, 54 year, male, donor ENCDO451RUA
Testis_b	SRR4421668	Testis	Testis	101PE	57055746	GEO: GSM2343589	ENCODE biosample ENCBS255MJZ, 54 year, male, donor ENCDO451RUA
Testis_b	SRR4422587	Testis	Testis	101PE	25536699	GEO: GSM2343115	ENCODE biosample ENCBS315DHM, 37 year, male, donor ENCDO845WKR
Testis_b	SRR4422588	Testis	Testis	101PE	65954194	GEO: GSM2343115	ENCODE biosample ENCBS315DHM, 37 year, male, donor ENCDO845WKR
Testis_c	ERR315456	Testis	Testis	101PE	32054218	PMID: 24309898	Homo sapiens; testis_7b, individual V256
Testis_c	ERR315415	Testis	Testis	101PE	44085084	PMID: 24309898	Homo sapiens; testis_7e, individual V259
Testis_c	ERR315352	Testis	Testis	101PE	35915919	PMID: 24309898	Homo sapiens; testis_7a, individual V255
Testis_c	ERR315351	Testis	Testis	101PE	8808454	PMID: 24309898	Homo sapiens; testis_4a, individual V134
Testis_c	ERR315446	Testis	Testis	101PE	33605790	PMID: 24309898	Homo sapiens; testis_7d, individual V258
Testis_c	ERR315350	Testis	Testis	101PE	8881861	PMID: 24309898	Homo sapiens; testis_4a, individual V134
Testis_c	ERR315492	Testis	Testis	101PE	44436072	PMID: 24309898	Homo sapiens; testis_7f, individual V260
Testis_c	ERR315391	Testis	Testis	101PE	39007238	PMID: 24309898	Homo sapiens; testis_7c, individual V257
Thyroid_b	SRR4422614	Thyroid	Tissues	101PE	44900997	GEO: GSM2343108	ENCODE biosample ENCBS624WYQ, 54 year, male, donor ENCDO451RUA
Thyroid_b	SRR4422152	Thyroid	Tissues	101PE	22256426	GEO: GSM2344026	ENCODE biosample ENCBS123ACX, 51 year, female, donor ENCDO271OUW
Thyroid_b	SRR4422153	Thyroid	Tissues	101PE	59700881	GEO: GSM2344026	ENCODE biosample ENCBS123ACX, 51 year, female, donor ENCDO271OUW
Thyroid_b	SRR4421528	Thyroid	Tissues	101PE	21184600	GEO: GSM2343466	ENCODE biosample ENCBS207DLU, 53 year, female, donor ENCDO793LXB
Thyroid_b	SRR4421529	Thyroid	Tissues	101PE	52288120	GEO: GSM2343466	ENCODE biosample ENCBS207DLU, 53 year, female, donor ENCDO793LXB
Thyroid_c	SRR1957207	Thyroid	Tissues	100PE	37897351	PMID: 25970244	Thyroid RNA, pooled male and female (Clontech)
Thyroid_c	ERR315358	Thyroid	Tissues	101PE	15797139	PMID: 24309898	Homo sapiens; thyroid_5a, individual V196
Thyroid_c	ERR315422	Thyroid	Tissues	101PE	15631970	PMID: 24309898	Homo sapiens; thyroid_5a, individual V196
Thyroid_c	ERR315412	Thyroid	Tissues	101PE	22366610	PMID: 24309898	Homo sapiens; thyroid_5b, individual V197
Thyroid_c	ERR315337	Thyroid	Tissues	101PE	22150193	PMID: 24309898	Homo sapiens; thyroid_5b, individual V197
Thyroid_c	ERR315428	Thyroid	Tissues	101PE	11830469	PMID: 24309898	Homo sapiens; thyroid_5c, individual V198
Thyroid_c	ERR315363	Thyroid	Tissues	101PE	11921978	PMID: 24309898	Homo sapiens; thyroid_5c, individual V198
Thyroid_c	ERR315491	Thyroid	Tissues	101PE	8978003	PMID: 24309898	Homo sapiens; thyroid_5d, individual V199
Thyroid_c	ERR315397	Thyroid	Tissues	101PE	12544599	PMID: 24309898	Homo sapiens; thyroid_5d, individual V199
Thyroid_c	ERR315483	Thyroid	Tissues	101PE	9052163	PMID: 24309898	Homo sapiens; thyroid_5d, individual V199
Thyroid_d	ERR1518873	Thyroid	Tissues	101PE	37537628	PMID: 27494611	Normal thyroid tissue
Thyroid_d	ERR1518862	Thyroid	Tissues	101PE	34078890	PMID: 27494611	Normal thyroid tissue
Thyroid_d	ERR1518868	Thyroid	Tissues	101PE	37537628	PMID: 27494611	Normal thyroid tissue
Thyroid_d	ERR1518858	Thyroid	Tissues	101PE	35391491	PMID: 27494611	Normal thyroid tissue
Thyroid_d	ERR1518860	Thyroid	Tissues	101PE	39968405	PMID: 27494611	Normal thyroid tissue
MNC	SRR5048189	WBC_MNC	Immune_hematopoiesis	101PE	209023113	GEO: GSM2400246	ENCODE biosample ENCBS539ENC: Peripherial Blood Mononuclear Cells (hMNC-PB) from a 52 year old caucasian female
WBC_MNC_b	SRR629608	WBC_MNC	Immune_hematopoiesis	100PE	71668807	PRJNA182351	Human white blood cells no treatment, female, 33 year
WBC_MNC_b	SRR629598	WBC_MNC	Immune_hematopoiesis	100PE	37028065	PRJNA182351	Human white blood cells no treatment, male 30 year
WBC_MNC_b	SRR629590	WBC_MNC	Immune_hematopoiesis	100PE	38623285	PRJNA182351	Human white blood cells no treatment, male, 36 year
WBC_MNC_b	SRR629586	WBC_MNC	Immune_hematopoiesis	100PE	87405914	PRJNA182351	Human white blood cells no treatment, male, 47 year
WBC_MNC_c	SRR629588	WBC_MNC	Immune_hematopoiesis	100PE	51310786	PRJNA182351	Human white blood cells no treatment, female, 30 year
WBC_MNC_c	SRR629584	WBC_MNC	Immune_hematopoiesis	100PE	90043105	PRJNA182351	Human white blood cells no treatment, male, 39 year
WBC_MNC_c	SRR629575	WBC_MNC	Immune_hematopoiesis	100PE	66152307	PRJNA182351	Human white blood cells no treatment, female, 35 year
WBC_MNC_c	SRR629560	WBC_MNC	Immune_hematopoiesis	100PE	52499823	PRJNA182351	Human white blood cells no treatment, female, 27 year
MSC	SRR534335	MSC	Precursors	101PE	157580617	GEO: GSM981260	CSHL_RnaSeq_hMSC-AT_cell_total
MSC	SRR545691	MSC	Precursors	101PE	126487708	GEO: GSM984607	CSHL_RnaSeq_hMSC-UC_cell_total
CL_PNT2	SRR436884	CL_PNT2	CLines	76SE	59124618	PMID: 22354987	ESRP KD and OE
CL_Gm12878	SRR521447	CL_Gm12878	CLines	76PE	23863096	GEO: GSM958728	Caltech_RnaSeq_GM12878_2x75_200
CL_Gm12878	SRR521448	CL_Gm12878	CLines	76PE	27531230	GEO: GSM958728	Caltech_RnaSeq_GM12878_2x75_200
CL_Gm12878	SRR521449	CL_Gm12878	CLines	76PE	11908811	GEO: GSM958728	Caltech_RnaSeq_GM12878_2x75_200
CL_Gm12878	SRR521450	CL_Gm12878	CLines	76PE	12768316	GEO: GSM958728	Caltech_RnaSeq_GM12878_2x75_200
CL_Gm12878	SRR521451	CL_Gm12878	CLines	76PE	25357127	GEO: GSM958728	Caltech_RnaSeq_GM12878_2x75_200
CL_Gm12878	SRR521452	CL_Gm12878	CLines	76PE	29999244	GEO: GSM958728	Caltech_RnaSeq_GM12878_2x75_200
CL_Gm12878	SRR521453	CL_Gm12878	CLines	76PE	8360927	GEO: GSM958728	Caltech_RnaSeq_GM12878_2x75_200
CL_Gm12878	SRR521454	CL_Gm12878	CLines	76PE	8365032	GEO: GSM958728	Caltech_RnaSeq_GM12878_2x75_200
CL_Gm12878	SRR521455	CL_Gm12878	CLines	76PE	36833272	GEO: GSM958728	Caltech_RnaSeq_GM12878_2x75_200
CL_Gm12878	SRR521456	CL_Gm12878	CLines	76PE	27238727	GEO: GSM958728	Caltech_RnaSeq_GM12878_2x75_200
NPC_a	SRR447172	NPC	NPC	75SE	25940838	PMID: 22730494, GEO: GSM899454	primary neural progenitors,17 week lentiviral-mediated knockdown of GFP (control)
NPC_a	SRR447173	NPC	NPC	75SE	26910911	PMID: 22730494, GEO: GSM899454	primary neural progenitors,17 week lentiviral-mediated knockdown of GFP (control)
NPC_a	SRR447174	NPC	NPC	75SE	25732136	PMID: 22730494, GEO: GSM899454	primary neural progenitors,17 week lentiviral-mediated knockdown of GFP (control)
NPC_a	SRR447175	NPC	NPC	75SE	28563165	PMID: 22730494, GEO: GSM899454	primary neural progenitors,17 week lentiviral-mediated knockdown of GFP (control)
NPC_a	SRR447176	NPC	NPC	75SE	22438533	PMID: 22730494, GEO: GSM899454	primary neural progenitors,17 week lentiviral-mediated knockdown of GFP (control)
NPC_b	SRR447182	NPC	NPC	75SE	26053995	PMID: 22730494, GEO: GSM899456	primary neural progenitors, 17 week, non-transduced
NPC_b	SRR447183	NPC	NPC	75SE	26189072	PMID: 22730494, GEO: GSM899456	primary neural progenitors, 17 week, non-transduced
NPC_b	SRR447184	NPC	NPC	75SE	26495337	PMID: 22730494, GEO: GSM899456	primary neural progenitors, 17 week, non-transduced
NPC_b	SRR447185	NPC	NPC	75SE	25613456	PMID: 22730494, GEO: GSM899456	primary neural progenitors, 17 week, non-transduced
NPC_b	SRR447186	NPC	NPC	75SE	26884312	PMID: 22730494, GEO: GSM899456	primary neural progenitors, 17 week, non-transduced
Neurons	SRR2557113	Neurons	Neural	150PE	5785510	PMID: 22730494, GEO: GSM1901333	25yo ctx neuron
Astrocytes	SRR2557089	Astrocytes	Glia	150PE	16059476	PMID: 266878308, GEO: GSM1901309	8yo ctx astro
Astrocytes	SRR2557090	Astrocytes	Glia	75PE	25600120	PMID: 266878308, GEO: GSM1901310	13yo ctx astro
Astrocytes	SRR2557091	Astrocytes	Glia	150PE	16990835	PMID: 266878308, GEO: GSM1901311	16yo ctx astro
Astrocytes	SRR2557092	Astrocytes	Glia	150PE	25356608	PMID: 266878308, GEO: GSM1901312	21yo ctx astro
Astrocytes	SRR2557093	Astrocytes	Glia	150PE	4334592	PMID: 266878308, GEO: GSM1901313	22yo ctx astro
Astrocytes	SRR2557094	Astrocytes	Glia	150PE	19294850	PMID: 266878308, GEO: GSM1901314	35yo ctx astro
Astrocytes	SRR2557095	Astrocytes	Glia	150PE	19268507	PMID: 266878308, GEO: GSM1901315	47yo ctx astro
Astrocytes	SRR2557096	Astrocytes	Glia	150PE	21859084	PMID: 266878308, GEO: GSM1901316	51yo ctx astro
Astrocytes	SRR2557097	Astrocytes	Glia	150PE	17355740	PMID: 266878308, GEO: GSM1901317	53yo ctx astro
Astrocytes	SRR2557098	Astrocytes	Glia	150PE	13315800	PMID: 266878308, GEO: GSM1901318	60yo ctx astro
Astrocytes	SRR2557099	Astrocytes	Glia	150PE	19791939	PMID: 266878308, GEO: GSM1901319	63yo ctx 1 astro
Astrocytes	SRR2557100	Astrocytes	Glia	150PE	23651377	PMID: 266878308, GEO: GSM1901320	63yo ctx 2 astro
Microglia	SRR2557119	Microglia	Glia	150PE	6195003	PMID: 266878308, GEO: GSM1901339	45yo ctx myeloid
Microglia	SRR2557120	Microglia	Glia	150PE	23259402	PMID: 266878308, GEO: GSM1901340	51yo_ctx_myeloid
Microglia	SRR2557121	Microglia	Glia	150PE	20995851	PMID: 266878308, GEO: GSM1901341	63_yo_ctx_myeloid
Oligodendrocytes	SRR2557114	Oligodentdrocytes	Glia	150PE	5584825	PMID: 266878308, GEO: GSM1901334	22yo ctx oligo
Oligodendrocytes	SRR2557115	Oligodentdrocytes	Glia	150PE	19477246	PMID: 266878308, GEO: GSM1901335	63yo ctx A oligo
Oligodendrocytes	SRR2557116	Oligodentdrocytes	Glia	150PE	21085336	PMID: 266878308, GEO: GSM1901336	63yo ctx B oligo
Oligodendrocytes	SRR2557117	Oligodentdrocytes	Glia	150PE	7434502	PMID: 266878308, GEO: GSM1901337	47yo ctx oligo
Oligodendrocytes	SRR2557118	Oligodentdrocytes	Glia	150PE	24903040	PMID: 266878308, GEO: GSM1901338	63yo ctx 3 oligo
Brain_Endoth	SRR2557122	Endothelium	Tissues	150PE	18276004	PMID: 266878308, GEO: GSM1901342	47 yo ctx endo
Brain_Endoth	SRR2557123	Endothelium	Tissues	75PE	32674809	PMID: 266878308, GEO: GSM1901343	13yo ctx endo
Bladder_a	SRR1576176	Bladder	Tissues	101PE	29354293	PMID: 25751143, GEO: GSM1505601	Bladder RUN2 L005
Bladder_a	SRR1576151	Bladder	Tissues	101PE	37028008	PMID: 25751143, GEO: GSM1505576	Bladder RUN1 L007
Bladder_a	ERR315453	Bladder	Tissues	101PE	6265687	PMID: 24309898	Homo sapiens; urinarybladder_5c, individual V177
Bladder_a	ERR315334	Bladder	Tissues	101PE	6335992	PMID: 24309898	Homo sapiens; urinarybladder_5c, individual V177
Bladder_a	ERR315447	Bladder	Tissues	101PE	14409428	PMID: 24309898	Homo sapiens; urinarybladder_5c, individual V177
Bladder_a	ERR315370	Bladder	Tissues	101PE	5633845	PMID: 24309898	Homo sapiens; urinarybladder_5b, individual V176
Bladder_a	ERR315421	Bladder	Tissues	101PE	5557608	PMID: 24309898	Homo sapiens; urinarybladder_5b, individual V176
Bladder_a	ERR315355	Bladder	Tissues	101PE	15939817	PMID: 24309898	Homo sapiens; urinarybladder_5b, individual V176
Bladder_a	SRR787270	Bladder	Tissues	101PE	26971711	PMID: 24344320	Biochain:R-1234010-P
Bladder_a	SRR400342	Bladder	Tissues	115PE	37079293	GEO: GSM863055	bladder tissue from human s1, normal
Small_intestine	SRR1957202	Small_intestine	Digestive_tract	100PE	36246145	PMID: 25970244	Small Intestine RNA, adult, pooled male and female, Clontech
Small_intestine	SRR1576184	Small_intestine	Digestive_tract	101PE	26033487	PMID: 25751143, GEO: GSM1505609	Intestine RUN2 L007
Small_intestine	SRR1576159	Small_intestine	Digestive_tract	101PE	27202465	PMID: 25751143, GEO: GSM1505584	Intestine RUN1 L008
Small_intestine	ERR315408	Small_intestine	Digestive_tract	101PE	10699216	PMID: 24309898	Homo sapiens; smallintestine_4b, individual V152
Small_intestine	ERR315388	Small_intestine	Digestive_tract	101PE	11862929	PMID: 24309898	Homo sapiens; smallintestine_4c, individual V153
Small_intestine	ERR315419	Small_intestine	Digestive_tract	101PE	9258742	PMID: 24309898	Homo sapiens; smallintestine_4a, individual V151
Small_intestine	ERR315381	Small_intestine	Digestive_tract	101PE	11946771	PMID: 24309898	Homo sapiens; smallintestine_4c, individual V153
Small_intestine	ERR315364	Small_intestine	Digestive_tract	101PE	10640327	PMID: 24309898	Homo sapiens; smallintestine_4b, individual V152
Small_intestine	ERR315344	Small_intestine	Digestive_tract	101PE	9334748	PMID: 24309898	Homo sapiens; smallintestine_4a, individual V151
Small_intestine	ERR315409	Small_intestine	Digestive_tract	101PE	9794787	PMID: 24309898	Homo sapiens; smallintestine_4d, individual V156
Small_intestine	ERR315423	Small_intestine	Digestive_tract	101PE	9710257	PMID: 24309898	Homo sapiens; smallintestine_4d, individual V156
Retina_macular	SRR5225791	Retina	Neural	101PE	47669599	GEO: GSM2475315	Macular Retina, 70 year, male, 11-2043
Retina_macular	SRR5225787	Retina	Neural	101PE	32961560	GEO: GSM2475311	Macular Retina, 72 year, male, 11-1875
Retina_macular	SRR5225783	Retina	Neural	101PE	52011769	GEO: GSM2475307	Macular Retina, 95 year, female, 11-1833
Retina_macular	SRR5225779	Retina	Neural	101PE	57150027	GEO: GSM2475303	Macular Retina, 88 year, female, 11-1648
Retina_macular	SRR5225775	Retina	Neural	101PE	51197577	GEO: GSM2475299	Macular Retina, 62 year, male, 11-1624
Retina_macular	SRR5225771	Retina	Neural	101PE	54692254	GEO: GSM2475295	Macular Retina, 63 year, male, 11-1614
Retina_macular	SRR5225767	Retina	Neural	101PE	49666950	GEO: GSM2475291	Macular Retina, 62 year, female, 11-1556
Retina_macular	SRR5225763	Retina	Neural	101PE	57312036	GEO: GSM2475287	Macular Retina, 79 year, male, 11-1516
Retina_peripheral	SRR5225789	Retina	Neural	101PE	54175782	GEO: GSM2475313	Peripheral Retina, 70 year, male, 11-2043
Retina_peripheral	SRR5225785	Retina	Neural	101PE	51122073	GEO: GSM2475309	Peripheral Retina, 72 year, male, 11-1875
Retina_peripheral	SRR5225781	Retina	Neural	101PE	49598463	GEO: GSM2475305	Peripheral Retina, 95 year, female, 11-1833
Retina_peripheral	SRR5225777	Retina	Neural	101PE	48062619	GEO: GSM2475301	Peripheral Retina, 88 year, female, 11-1648
Retina_peripheral	SRR5225773	Retina	Neural	101PE	52174887	GEO: GSM2475297	Peripheral Retina, 62 year, male, 11-1624
Retina_peripheral	SRR5225769	Retina	Neural	101PE	52948997	GEO: GSM2475293	Peripheral Retina, 63 year, male, 11-1614
Retina_peripheral	SRR5225765	Retina	Neural	101PE	54663605	GEO: GSM2475289	Peripheral Retina, 62 year, female, 11-1556
Retina_peripheral	SRR5225761	Retina	Neural	101PE	60580268	GEO: GSM2475285	Peripheral Retina, 79 year, male, 11-1516
Retina_a	SRR3957253	Retina	Neural	100SE	60351769	PMID: 27875314/27506984, GEO: GSM2254342	Human_Retina 1
Retina_a	SRR3957254	Retina	Neural	100SE	59226421	PMID: 27875314/27506984, GEO: GSM2254343	Human_Retina 2
Spleen_a	SRR4422445	Spleen	Immune_hematopoiesis	101PE	46867284	GEO: GSM2344317	ENCODE biosample ENCBS213OJV, spleen, 53 year, female, donor ENCDO793LXB
Spleen_a	SRR4421642	Spleen	Immune_hematopoiesis	101PE	45609759	GEO: GSM2343570	ENCODE biosample ENCBS297IUS, spleen, 37 year, male, donor ENCDO845WKR
Spleen_a	SRR4421468	Spleen	Immune_hematopoiesis	101PE	40361760	GEO: GSM2343387	ENCODE biosample ENCBS253SDK, spleen, 51 year, female, donor ENCDO271OUW
Spleen_a	SRR4421334	Spleen	Immune_hematopoiesis	101PE	28676440	GEO: GSM2343230	ENCODE biosample ENCBS379XNT, spleen, 54 year, male, donor ENCDO451RUA
Spleen_a	SRR1957203	Spleen	Immune_hematopoiesis	100PE	41337897	PMID: 25970244	Spleen RNA pooled male and female (Clontech)
Spleen_a	SRR1576185	Spleen	Immune_hematopoiesis	101PE	22320845	PMID: 25751143, GEO: GSM1505610	Spleen RUN2 L008
Spleen_b	SRR1576160	Spleen	Immune_hematopoiesis	101PE	19333215	PMID: 25751143, GEO: GSM1505585	Spleen RUN1 L002
Spleen_b	ERR315405	Spleen	Immune_hematopoiesis	101PE	12170875	PMID: 24309898	Homo sapiens; spleen_3b, individual V83
Spleen_b	ERR315416	Spleen	Immune_hematopoiesis	101PE	11937216	PMID: 24309898	Homo sapiens; spleen_3b, individual V83
Spleen_b	ERR315448	Spleen	Immune_hematopoiesis	101PE	27044102	PMID: 24309898	Homo sapiens; spleen_3d, individual V85
Spleen_b	ERR315338	Spleen	Immune_hematopoiesis	101PE	26648704	PMID: 24309898	Homo sapiens; spleen_3a, individual V82
Spleen_b	ERR315473	Spleen	Immune_hematopoiesis	101PE	24473462	PMID: 24309898	Homo sapiens; spleen_3c, individual V84
Spleen_b	SRR1186056	Spleen	Immune_hematopoiesis	101PE	27214885	PMID: 25057852, GEO: GSM1342288	normal tissue_Spleen
Stomach_a	SRR4422373	Stomach	Digestive_tract	101PE	60371020	GEO: GSM2344250	ENCODE biosample ENCBS038PAI, 51 year, female, donor ENCDO271OUW
Stomach_a	SRR4422210	Stomach	Digestive_tract	101PE	57673169	GEO: GSM2344102	ENCODE biosample ENCBS607DWD, 53 year, female, donor ENCDO793LXB
Stomach_a	SRR4421836	Stomach	Digestive_tract	101PE	53973090	GEO: GSM2343737	ENCODE biosample ENCBS085LTC, 37 year, male, donor ENCDO845WKR
Stomach_a	SRR4421597	Stomach	Digestive_tract	101PE	63616853	GEO: GSM2343530	ENCODE biosample ENCBS141UOA, 54 year, male, donor ENCDO451RUA
Stomach_b	SRR3151761	Stomach	Digestive_tract	101PE	41537339	GEO: GSM2055790	Stomach_rep2
Stomach_b	SRR3151755	Stomach	Digestive_tract	101PE	23080723	GEO: GSM2055784	Stomach_rep1
Stomach_b	SRR1957205	Stomach	Digestive_tract	100PE	36509330	PMID: 25970244	Stomach RNA, pooled male and female (Clontech)
Stomach_b	ERR315379	Stomach	Digestive_tract	101PE	22610772	PMID: 24309898	Homo sapiens; stomach_3a, individual V90
Stomach_b	ERR315467	Stomach	Digestive_tract	101PE	20097530	PMID: 24309898	Homo sapiens; stomach_a, individual V18
Stomach_b	ERR315485	Stomach	Digestive_tract	101PE	15684423	PMID: 24309898	Homo sapiens; stomach_3b, individual V91
Stomach_b	ERR315369	Stomach	Digestive_tract	101PE	16004990	PMID: 24309898	Homo sapiens; stomach_3b, individual V91
Thymus_a	SRR1957206	Thymus	Immune_hematopoiesis	100PE	36347876	PMID: 25970244	Thymus pooled male and female (Clontech)
Thymus_a	SRR1576187	Thymus	Immune_hematopoiesis	101PE	22405565	PMID: 25751143, GEO: GSM1505612	Thymus RUN2 L008
Thymus_a	SRR1576162	Thymus	Immune_hematopoiesis	101PE	19028567	PMID: 25751143, GEO: GSM1505587	Thymus RUN1 L002
Thymus_b	SRR1299438	Thymus	Immune_hematopoiesis	50PE	36252734	PMID: 25083870, GEO: GSM1399180	Human whole thymus extract_1
Thymus_b	SRR1299520	Thymus	Immune_hematopoiesis	50PE	36391950	PMID: 25083870, GEO: GSM1399180	Human whole thymus extract_1
Thymus_b	SRR1299521	Thymus	Immune_hematopoiesis	50PE	32636576	PMID: 25083870, GEO: GSM1399180	Human whole thymus extract_1
Thymus_b	SRR1299439	Thymus	Immune_hematopoiesis	50PE	34776351	PMID: 25083870, GEO: GSM1399181	Human whole thymus extract_2
Thymus_b	SRR1299440	Thymus	Immune_hematopoiesis	50PE	34930991	PMID: 25083870, GEO: GSM1399181	Human whole thymus extract_2
Thymus_b	SRR1299441	Thymus	Immune_hematopoiesis	50PE	31238820	PMID: 25083870, GEO: GSM1399181	Human whole thymus extract_2
Bone_marrow_a	SRR1812318	Bone_marrow	Immune_hematopoiesis	150PE	35602654	PMID: 25728669	24 year, male, normal human bone marrow purchased from AllCells, LLC
Bone_marrow_a	SRR1812320	Bone_marrow	Immune_hematopoiesis	150PE	37817563	PMID: 25728669	24 year, male, normal human bone marrow purchased from AllCells, LLC
Bone_marrow_a	SRR1812321	Bone_marrow	Immune_hematopoiesis	150PE	43366419	PMID: 25728669	24 year, male, normal human bone marrow purchased from AllCells, LLC
Bone_marrow_b	SRR1691645	Bone_marrow	Immune_hematopoiesis	100PE	68253150	PMID: 25586593, GEO: GSM1558068	Normal bone marrow 1, 62 year, male
Bone_marrow_b	SRR1691646	Bone_marrow	Immune_hematopoiesis	100PE	64709278	PMID: 25586593, GEO: GSM1558069	Normal bone marrow 2, 51 year, male
Bone_marrow_b	SRR1691647	Bone_marrow	Immune_hematopoiesis	99PE	68883377	PMID: 25586593, GEO: GSM1558070	Normal bone marrow 3, 38 year, male
Bone_marrow_b	SRR1691648	Bone_marrow	Immune_hematopoiesis	99PE	69400439	PMID: 25586593, GEO: GSM1558071	Normal bone marrow 4, 75 year, male
Bone_marrow_c	ERR315333	Bone_marrow	Immune_hematopoiesis	101PE	17182987	PMID: 24309898	Homo sapiens; bonemarrow_6c, individual V250
Bone_marrow_c	ERR315395	Bone_marrow	Immune_hematopoiesis	101PE	16953167	PMID: 24309898	Homo sapiens; bonemarrow_6c, individual V250
Bone_marrow_c	ERR315486	Bone_marrow	Immune_hematopoiesis	101PE	16306820	PMID: 24309898	Homo sapiens; bonemarrow_6a, individual V248
Bone_marrow_c	ERR315396	Bone_marrow	Immune_hematopoiesis	101PE	16506110	PMID: 24309898	Homo sapiens; bonemarrow_6a, individual V248
Bone_marrow_c	ERR315425	Bone_marrow	Immune_hematopoiesis	101PE	14755708	PMID: 24309898	Homo sapiens; bonemarrow_5a, individual V230
Bone_marrow_c	ERR315469	Bone_marrow	Immune_hematopoiesis	101PE	14932588	PMID: 24309898	Homo sapiens; bonemarrow_5a, individual V230
Bone_marrow_c	ERR315404	Bone_marrow	Immune_hematopoiesis	101PE	17223283	PMID: 24309898	Homo sapiens; bonemarrow_6b, individual V249
Bone_marrow_c	ERR315406	Bone_marrow	Immune_hematopoiesis	101PE	17421796	PMID: 24309898	Homo sapiens; bonemarrow_6b, individual V249
CL_MCF7	SRR5221953	CL_MCF7	CLines	125PE	69211834	GEO: GSM2474227	siCTL_N1, MCF7_siRNA control
CL_MCF7	SRR5221954	CL_MCF7	CLines	125PE	70672742	GEO: GSM2474228	siCTL_N2, MCF7_siRNA control
CL_MCF7	SRR4239822	CL_MCF7	CLines	101PE	87815004	GEO: GSM2309313	wild-type MCF-7 cells
CL_LP1	SRR1723074	CL_LP1	CLines	50PE	15572501	PMID: 26731516, GEO: GSM1568496	LP1_DMSO_6h_R1 (SL62425)
CL_LP1	SRR1723075	CL_LP1	CLines	50PE	15748897	PMID: 26731516, GEO: GSM1568496	LP1_DMSO_6h_R1 (SL62425)
CL_LP1	SRR1723076	CL_LP1	CLines	50PE	15932260	PMID: 26731516, GEO: GSM1568496	LP1_DMSO_6h_R1 (SL62425)
CL_LP1	SRR1723077	CL_LP1	CLines	50PE	15439267	PMID: 26731516, GEO: GSM1568497	LP1_DMSO_6h_R2 (SL62426)
CL_LP1	SRR1723078	CL_LP1	CLines	50PE	15647964	PMID: 26731516, GEO: GSM1568497	LP1_DMSO_6h_R2 (SL62426)
CL_LP1	SRR1723079	CL_LP1	CLines	50PE	15839702	PMID: 26731516, GEO: GSM1568497	LP1_DMSO_6h_R2 (SL62426)
CL_LP1	SRR1723086	CL_LP1	CLines	50PE	9654060	PMID: 26731516, GEO: GSM1568500	LP1_DMSO_6h_R1 (CM38049001)
CL_LP1	SRR1723087	CL_LP1	CLines	50PE	9730381	PMID: 26731516, GEO: GSM1568500	LP1_DMSO_6h_R1 (CM38049001)
CL_LP1	SRR1723088	CL_LP1	CLines	50PE	9890903	PMID: 26731516, GEO: GSM1568500	LP1_DMSO_6h_R1 (CM38049001)
CL_LP1	SRR1723089	CL_LP1	CLines	50PE	9875008	PMID: 26731516, GEO: GSM1568500	LP1_DMSO_6h_R1 (CM38049001)
CL_LP1	SRR1723090	CL_LP1	CLines	50PE	8587747	PMID: 26731516, GEO: GSM1568501	LP1_DMSO_6h_R2 (CM38049002)
CL_LP1	SRR1723091	CL_LP1	CLines	50PE	8651203	PMID: 26731516, GEO: GSM1568501	LP1_DMSO_6h_R2 (CM38049002)
CL_LP1	SRR1723092	CL_LP1	CLines	50PE	8884080	PMID: 26731516, GEO: GSM1568501	LP1_DMSO_6h_R2 (CM38049002)
CL_LP1	SRR1723093	CL_LP1	CLines	50PE	8883288	PMID: 26731516, GEO: GSM1568501	LP1_DMSO_6h_R2 (CM38049002)
Embr_Forebrain_St13_14	ERR1473334	Forebrain_St13_14	Embr_Forebrain_St13_14	200PE	42050815	PRJEB14594	HDBR401
Embr_Forebrain_St13_14	ERR1473332	Forebrain_St13_14	Embr_Forebrain_St13_14	201PE	38312986	PRJEB14594	HDBR396
Embr_Forebrain_St13_14	ERR1473333	Forebrain_St13_14	Embr_Forebrain_St13_14	200PE	44949219	PRJEB14594	HDBR399
Embr_Forebrain_St17_20	ERR1473331	Forebrain_St13_14	Embr_Forebrain_St17_20	200PE	44421105	PRJEB14594	HDBR392
Embr_Forebrain_St17_20	ERR1473330	Forebrain_St17_20	Embr_Forebrain_St17_20	199PE	45206889	PRJEB14594	HDBR387
Embr_Forebrain_St17_20	ERR1473345	Forebrain_St17_20	Embr_Forebrain_St17_20	199PE	47243369	PRJEB14594	HDBR758
Embr_Forebrain_St22_23	ERR1473329	Forebrain_St22_23	Embr_Forebrain_St22_23	200PE	60017671	PRJEB14594	HDBR325
Embr_Forebrain_St22_23	ERR1473326	Forebrain_St22_23	Embr_Forebrain_St22_23	200PE	71412904	PRJEB14594	HDBR295
Embr_Forebrain_St22_23	ERR1473327	Forebrain_St22_23	Embr_Forebrain_St22_23	200PE	23967646	PRJEB14594	HDBR298
Embr_Forebrain_St22_23	ERR1473328	Forebrain_St22_23	Embr_Forebrain_St22_23	200PE	23967646	PRJEB14594	HDBR298
Embr_Forebrain_9_12wpc	ERR1473335	Forebrain_13_17wpc	Embr_Forebrain_9_10wpc	200PE	41555830	PRJEB14594	HDBR402
Embr_Forebrain_9_12wpc	ERR1473336	Forebrain_13_17wpc	Embr_Forebrain_9_10wpc	201PE	49265980	PRJEB14594	HDBR458
Embr_Forebrain_9_12wpc	ERR1473337	Forebrain_13_17wpc	Embr_Forebrain_9_10wpc	201PE	57272349	PRJEB14594	HDBR459
Embr_Forebrain_9_12wpc	ERR1473343	Forebrain_13_17wpc	Embr_Forebrain_9_10wpc	200PE	38936518	PRJEB14594	HDBR663
Embr_Forebrain_9_12wpc	ERR1473344	Forebrain_13_17wpc	Embr_Forebrain_9_10wpc	200PE	47404918	PRJEB14594	HDBR664
Embr_Forebrain_9_12wpc	ERR1473341	Forebrain_13_17wpc	Embr_Forebrain_11_12wpc	200PE	89604240	PRJEB14594	HDBR615
Embr_Forebrain_9_12wpc	ERR1473342	Forebrain_13_17wpc	Embr_Forebrain_11_12wpc	199PE	37159433	PRJEB14594	HDBR616
Embr_Forebrain_9_12wpc	ERR1473338	Forebrain_13_17wpc	Embr_Forebrain_11_12wpc	200PE	44034041	PRJEB14594	HDBR594
Embr_Forebrain_9_12wpc	ERR1473339	Forebrain_13_17wpc	Embr_Forebrain_11_12wpc	200PE	44474693	PRJEB14594	HDBR596
Embr_Forebrain_9_12wpc	ERR1473340	Forebrain_13_17wpc	Embr_Forebrain_11_12wpc	200PE	44396561	PRJEB14594	HDBR597
Embr_Cortex_13_17wpc	ERR1473174	Cortex_13_17wpc	Embr_Cortex_13wpc	199PE	46718847	PRJEB14594	HDBR569
Embr_Cortex_13_17wpc	ERR1473180	Cortex_13_17wpc	Embr_Cortex_13wpc	199PE	39097804	PRJEB14594	HDBR563
Embr_Cortex_13_17wpc	ERR1473181	Cortex_13_17wpc	Embr_Cortex_13wpc	201PE	43772795	PRJEB14594	HDBR558
Embr_Cortex_13_17wpc	ERR1473204	Cortex_13_17wpc	Embr_Cortex_13wpc	201PE	51337906	PRJEB14594	HDBR568
Embr_Cortex_13_17wpc	ERR1473205	Cortex_13_17wpc	Embr_Cortex_13wpc	200PE	55625026	PRJEB14594	HDBR561
Embr_Cortex_13_17wpc	ERR1473220	Cortex_13_17wpc	Embr_Cortex_13wpc	200PE	51054599	PRJEB14594	HDBR562
Embr_Cortex_13_17wpc	ERR1473191	Cortex_13_17wpc	Embr_Cortex_14wpc	200PE	40582998	PRJEB14594	HDBR556
Embr_Cortex_13_17wpc	ERR1473209	Cortex_13_17wpc	Embr_Cortex_14wpc	200PE	46000594	PRJEB14594	HDBR555
Embr_Cortex_13_17wpc	ERR1473243	Cortex_13_17wpc	Embr_Cortex_14wpc	200PE	43477458	PRJEB14594	HDBR554
Embr_Cortex_13_17wpc	ERR1473257	Cortex_13_17wpc	Embr_Cortex_14wpc	201PE	42776622	PRJEB14594	HDBR553
Embr_Cortex_13_17wpc	ERR1473179	Cortex_13_17wpc	Embr_Cortex_15wpc	200PE	59065257	PRJEB14594	HDBR538
Embr_Cortex_13_17wpc	ERR1473203	Cortex_13_17wpc	Embr_Cortex_15wpc	199PE	36135072	PRJEB14594	HDBR539
Embr_Cortex_13_17wpc	ERR1473219	Cortex_13_17wpc	Embr_Cortex_15wpc	199PE	33237634	PRJEB14594	HDBR541
Embr_Cortex_13_17wpc	ERR1473236	Cortex_13_17wpc	Embr_Cortex_15wpc	201PE	32287720	PRJEB14594	HDBR542
Embr_Cortex_13_17wpc	ERR1473251	Cortex_13_17wpc	Embr_Cortex_15wpc	200PE	40935989	PRJEB14594	HDBR543
Embr_Cortex_13_17wpc	ERR1473271	Cortex_13_17wpc	Embr_Cortex_15wpc	201PE	45295022	PRJEB14594	HDBR544
Embr_Cortex_13_17wpc	ERR1473274	Cortex_13_17wpc	Embr_Cortex_15wpc	199PE	34677876	PRJEB14594	HDBR546
Embr_Cortex_13_17wpc	ERR1473272	Cortex_13_17wpc	Embr_Cortex_15wpc	201PE	44842099	PRJEB14594	HDBR545
Embr_Cortex_13_17wpc	ERR1473178	Cortex_13_17wpc	Embr_Cortex_16wpc	200PE	58052747	PRJEB14594	HDBR504
Embr_Cortex_13_17wpc	ERR1473190	Cortex_13_17wpc	Embr_Cortex_16wpc	200PE	44935642	PRJEB14594	HDBR532
Embr_Cortex_13_17wpc	ERR1473208	Cortex_13_17wpc	Embr_Cortex_16wpc	201PE	35784027	PRJEB14594	HDBR533
Embr_Cortex_13_17wpc	ERR1473218	Cortex_13_17wpc	Embr_Cortex_16wpc	201PE	50869726	PRJEB14594	HDBR517
Embr_Cortex_13_17wpc	ERR1473227	Cortex_13_17wpc	Embr_Cortex_16wpc	200PE	43103464	PRJEB14594	HDBR534
Embr_Cortex_13_17wpc	ERR1473234	Cortex_13_17wpc	Embr_Cortex_16wpc	201PE	43767621	PRJEB14594	HDBR507
Embr_Cortex_13_17wpc	ERR1473235	Cortex_13_17wpc	Embr_Cortex_16wpc	200PE	38976888	PRJEB14594	HDBR518
Embr_Cortex_13_17wpc	ERR1473242	Cortex_13_17wpc	Embr_Cortex_16wpc	199PE	43225982	PRJEB14594	HDBR535
Embr_Cortex_13_17wpc	ERR1473256	Cortex_13_17wpc	Embr_Cortex_16wpc	201PE	31859304	PRJEB14594	HDBR536
Embr_Cortex_13_17wpc	ERR1473273	Cortex_13_17wpc	Embr_Cortex_16wpc	199PE	58664040	PRJEB14594	HDBR515
Embr_Cortex_13_17wpc	ERR1473199	Cortex_13_17wpc	Embr_Cortex_17wpc	199PE	45128105	PRJEB14594	HDBR696
Embr_Cortex_13_17wpc	ERR1473213	Cortex_13_17wpc	Embr_Cortex_17wpc	200PE	44106283	PRJEB14594	HDBR700
Embr_Cortex_13_17wpc	ERR1473265	Cortex_13_17wpc	Embr_Cortex_17wpc	204PE	8802076	PRJEB14594	HDBR697
Embr_Cortex_13_17wpc	ERR1473266	Cortex_13_17wpc	Embr_Cortex_17wpc	204PE	8802076	PRJEB14594	HDBR697

## Sheet: Mouse samples
VastDB_sample	SRA_ID	VastDB_subgroup	VastDB_group	Length	Read_number	Source	Info
Oocyte_a	SRR385625	Oocyte	EarlyDev	85SE	35407434	PMID: 22722858, GEO: GSM838743	Oocyte litter 1
Oocyte_a	SRR385626	Oocyte	EarlyDev	85SE	33791380	PMID: 22722858, GEO: GSM838744	Oocyte litter 2
Oocyte_a	SRR385627	Oocyte	EarlyDev	85SE	31324557	PMID: 22722858, GEO: GSM838745	Oocyte litter 3
Oocyte_b	ERR632216	Oocyte	EarlyDev	76PE	43269123	PMID:25896510	Mus musculus; s_MII.WE, C57BL6/J
Oocyte_b	DRR021567	Oocyte	EarlyDev	50SE	21321876	PMID: 25633350	MII_1 oocyte, C57BL/6 X ICR
Oocyte_b	DRR021568	Oocyte	EarlyDev	50SE	21060667	PMID: 25633350	MII_2, oocyte, C57BL/6 X ICR
Oocyte_b	DRR021569	Oocyte	EarlyDev	50SE	24411510	PMID: 25633350	MII_3, oocyte, C57BL/6 X ICR
Oocyte_b	DRR021570	Oocyte	EarlyDev	50SE	23522999	PMID: 25633350	MII_4, oocyte, C57BL/6 X ICR
Embr_2C_a	SRR385622	Embr_2C	EarlyDev	100PE	45315966	PMID: 22722858, GEO: GSM838740	2C litter 1
Embr_2C_a	SRR385623	Embr_2C	EarlyDev	100PE	42758512	PMID: 22722858, GEO: GSM838741	2C litter 2
Embr_2C_a	SRR385624	Embr_2C	EarlyDev	100PE	52173941	PMID: 22722858, GEO: GSM838742	2C litter 3
Embr_2C_c	SRR805337	Embr_2C	EarlyDev	59SE	102560296	PMID: 24408435, GEO: GSM1112654	Late 2-cell stage blastomere (46-48h post-fertilization), CAST/EiJ(mother) x C57BL/6J(father)
Embr_2C_c	SRR805338	Embr_2C	EarlyDev	52SE	124946227	PMID: 24408435, GEO: GSM1112655	Late 2-cell stage blastomere (46-48h post-fertilization), CAST/EiJ(mother) x C57BL/6J(father)
Embr_2C_c	SRR805339	Embr_2C	EarlyDev	59SE	134169143	PMID: 24408435, GEO: GSM1112656	Late 2-cell stage blastomere (46-48h post-fertilization), CAST/EiJ(mother) x C57BL/6J(father)
Embr_2C_c	SRR805340	Embr_2C	EarlyDev	59SE	121345710	PMID: 24408435, GEO: GSM1112657	Late 2-cell stage blastomere (46-48h post-fertilization), CAST/EiJ(mother) x C57BL/6J(father)
Embr_4C_a	SRR805226	Embr_4C	EarlyDev	53SE	14388610	PMID: 24408435, GEO: GSM1112543	4-cell stage blastomere, CAST/EiJ(mother) x C57BL/6J(father)
Embr_4C_a	SRR805227	Embr_4C	EarlyDev	53SE	14147208	PMID: 24408435, GEO: GSM1112544	4-cell stage blastomere, CAST/EiJ(mother) x C57BL/6J(father)
Embr_4C_a	SRR805228	Embr_4C	EarlyDev	53SE	17791075	PMID: 24408435, GEO: GSM1112545	4-cell stage blastomere, CAST/EiJ(mother) x C57BL/6J(father)
Embr_4C_a	SRR805229	Embr_4C	EarlyDev	53SE	25352397	PMID: 24408435, GEO: GSM1112546	4-cell stage blastomere, CAST/EiJ(mother) x C57BL/6J(father)
Embr_4C_a	SRR805230	Embr_4C	EarlyDev	53SE	19943313	PMID: 24408435, GEO: GSM1112547	4-cell stage blastomere, CAST/EiJ(mother) x C57BL/6J(father)
Embr_4C_a	SRR805231	Embr_4C	EarlyDev	53SE	18601327	PMID: 24408435, GEO: GSM1112548	4-cell stage blastomere, CAST/EiJ(mother) x C57BL/6J(father)
Embr_4C_a	SRR805232	Embr_4C	EarlyDev	53SE	23901064	PMID: 24408435, GEO: GSM1112549	4-cell stage blastomere, CAST/EiJ(mother) x C57BL/6J(father)
Embr_4C_b	SRR805223	Embr_4C	EarlyDev	53SE	27133961	PMID: 24408435, GEO: GSM1112540	4-cell stage blastomere, CAST/EiJ(mother) x C57BL/6J(father)
Embr_4C_b	SRR805224	Embr_4C	EarlyDev	53SE	26636804	PMID: 24408435, GEO: GSM1112541	4-cell stage blastomere, CAST/EiJ(mother) x C57BL/6J(father)
Embr_4C_b	SRR805225	Embr_4C	EarlyDev	53SE	15439924	PMID: 24408435, GEO: GSM1112542	4-cell stage blastomere, CAST/EiJ(mother) x C57BL/6J(father)
Embr_4C_b	SRR805233	Embr_4C	EarlyDev	53SE	21795957	PMID: 24408435, GEO: GSM1112550	4-cell stage blastomere, CAST/EiJ(mother) x C57BL/6J(father)
Embr_4C_b	SRR805234	Embr_4C	EarlyDev	53SE	11012202	PMID: 24408435, GEO: GSM1112551	4-cell stage blastomere, CAST/EiJ(mother) x C57BL/6J(father)
Embr_4C_b	SRR805235	Embr_4C	EarlyDev	53SE	18128587	PMID: 24408435, GEO: GSM1112552	4-cell stage blastomere, CAST/EiJ(mother) x C57BL/6J(father)
Embr_4C_b	SRR805236	Embr_4C	EarlyDev	53SE	20573099	PMID: 24408435, GEO: GSM1112553	4-cell stage blastomere, CAST/EiJ(mother) x C57BL/6J(father)
Embr_8C_a	SRR805237	Embr_8C	EarlyDev	53SE	21768233	PMID: 24408435, GEO: GSM1112554	8-cell stage blastomere, CAST/EiJ(mother) x C57BL/6J(father)
Embr_8C_a	SRR805238	Embr_8C	EarlyDev	53SE	18511017	PMID: 24408435, GEO: GSM1112555	8-cell stage blastomere, CAST/EiJ(mother) x C57BL/6J(father)
Embr_8C_a	SRR805239	Embr_8C	EarlyDev	53SE	14225462	PMID: 24408435, GEO: GSM1112556	8-cell stage blastomere, CAST/EiJ(mother) x C57BL/6J(father)
Embr_8C_a	SRR805240	Embr_8C	EarlyDev	53SE	14755036	PMID: 24408435, GEO: GSM1112557	8-cell stage blastomere, CAST/EiJ(mother) x C57BL/6J(father)
Embr_8C_a	SRR805241	Embr_8C	EarlyDev	53SE	21578159	PMID: 24408435, GEO: GSM1112558	8-cell stage blastomere, CAST/EiJ(mother) x C57BL/6J(father)
Embr_8C_a	SRR805242	Embr_8C	EarlyDev	53SE	22229782	PMID: 24408435, GEO: GSM1112559	8-cell stage blastomere, CAST/EiJ(mother) x C57BL/6J(father)
Embr_8C_a	SRR805243	Embr_8C	EarlyDev	53SE	20533150	PMID: 24408435, GEO: GSM1112560	8-cell stage blastomere, CAST/EiJ(mother) x C57BL/6J(father)
Embr_8C_b	SRR805255	Embr_8C	EarlyDev	53SE	21028384	PMID: 24408435, GEO: GSM1112572	8-cell stage blastomere, CAST/EiJ(mother) x C57BL/6J(father)
Embr_8C_b	SRR805256	Embr_8C	EarlyDev	53SE	8777737	PMID: 24408435, GEO: GSM1112573	8-cell stage blastomere, CAST/EiJ(mother) x C57BL/6J(father)
Embr_8C_b	SRR805257	Embr_8C	EarlyDev	53SE	18533010	PMID: 24408435, GEO: GSM1112574	8-cell stage blastomere, CAST/EiJ(mother) x C57BL/6J(father)
Embr_8C_b	SRR805258	Embr_8C	EarlyDev	53SE	20864480	PMID: 24408435, GEO: GSM1112575	8-cell stage blastomere, CAST/EiJ(mother) x C57BL/6J(father)
Embr_8C_b	SRR805259	Embr_8C	EarlyDev	53SE	20043172	PMID: 24408435, GEO: GSM1112576	8-cell stage blastomere, CAST/EiJ(mother) x C57BL/6J(father)
Embr_8C_b	SRR805261	Embr_8C	EarlyDev	53SE	18399960	PMID: 24408435, GEO: GSM1112578	8-cell stage blastomere, CAST/EiJ(mother) x C57BL/6J(father)
Embr_8C_b	SRR805262	Embr_8C	EarlyDev	53SE	14784686	PMID: 24408435, GEO: GSM1112579	8-cell stage blastomere, CAST/EiJ(mother) x C57BL/6J(father)
Embr_8C_b	SRR805263	Embr_8C	EarlyDev	53SE	18720561	PMID: 24408435, GEO: GSM1112580	8-cell stage blastomere, CAST/EiJ(mother) x C57BL/6J(father)
Embr_8C_b	SRR805264	Embr_8C	EarlyDev	53SE	18148223	PMID: 24408435, GEO: GSM1112581	8-cell stage blastomere, CAST/EiJ(mother) x C57BL/6J(father)
ESC_CGR8	SRR797058	ESC	ESC	101PE	234225906	PMID: 23739326, GEO: GSM1105747	CGR8 embryonic stem cell line
ESC_D3	SRR331051	ESC	ESC	76PE	30192850	PMID: 21884934, GEO: GSM774968	Embryonic stem cells, TAF3 control, rep 1
ESC_D3	SRR331053	ESC	ESC	76PE	32153052	PMID: 21884934, GEO: GSM774968	Embryonic stem cells, TAF3 control, rep 2
ESC_E14	SRR185887	ESC	ESC	76SE	27137688	PMID: 21514197, GEO: GSM706680	mES_RNA_Seq_control1
ESC_E14	SRR315594	ESC	ESC	50SE	83891817	PMID: 22056041 GEO: GSM765288	ES cell 36 hours in low-adhesion dishes w/o LIF 60 s CYH (100 ug/ml) mrna_mesc_nolif
ESC_E14	SRR414942	ESC	ESC	100SE	42201326	PMID: 22682255 GEO: GSM881355	E14_d0_RNA-seq
ESC_E14	SRR414943	ESC	ESC	100SE	27771151	PMID: 22682255 GEO: GSM881355	E14_d0_RNA-seq
ESC_E14	SRR530639	ESC	ESC	101PE	118849271	GEO: GSM973235	Stanford_RnaSeq_ES-E14
ESC_E14	SRR530640	ESC	ESC	101PE	164745054	GEO: GSM973235	Stanford_RnaSeq_ES-E14
ESC_J1	SRR599648	ESC	ESC	76PE+7	43040267	PMID: 21624812, GEO: GSM727427	J1_WT_mRNA-seq
ESC_OS25_TT2	SRR391029	ESC	ESC	75SE	26880152	PMID: 22305566, GEO: GSM850476	OS25 cells mRNA-Seq
ESC_OS25_TT2	SRR391030	ESC	ESC	75SE	26685714	PMID: 22305566, GEO: GSM850476	OS25 cells mRNA-Seq
ESC_OS25_TT2	SRR391031	ESC	ESC	75SE	26418877	PMID: 22305566, GEO: GSM850476	OS25 cells mRNA-Seq
ESC_OS25_TT2	SRR210855	ESC	ESC	51PE	15517740	PMID: 21624812 GEO: GSM727423	TT2_WT_mRNA-seq
ESC_OS25_TT2	SRR449479	ESC	ESC	101PE	24212677	PMID: 22722858, GEO: GSM905088	WT
ESC_v65	SRR039999	ESC	ESC	76PE	19147701	PMID: 20436462, GEO: GSM521650	ESC_RNASeq
ESC_v65	SRR040000	ESC	ESC	76PE	19756540	PMID: 20436462, GEO: GSM521650	ESC_RNASeq
ESC_v65	SRR040001	ESC	ESC	76PE	19161154	PMID: 20436462, GEO: GSM521650	ESC_RNASeq
iPS_a	SRR611665	iPSC	iPSC	101PE	19262401	PMID: 23217423, GEO: GSM1032506	SC1-iPS
iPS_a	SRR611683	iPSC	iPSC	101PE	32081467	PMID: 23217423, GEO: GSM1032524	SC4-iPS
iPS_b	SRR611677	iPSC	iPSC	101PE	47314841	PMID: 23217423, GEO: GSM1032518	SC3-iPS
PGC_E13_5	SRR609722	PGC_E13_5	PGC	101SE	9310299	PMID: 23151479, 23399596, GEO: GSM1027242	WT rep1
PGC_E13_5	SRR609723	PGC_E13_5	PGC	101SE	9588351	PMID: 23151479, 23399596, GEO: GSM1027242	WT rep1
PGC_E13_5	SRR609724	PGC_E13_5	PGC	101SE	8255278	PMID: 23151479, 23399596, GEO: GSM1027242	WT rep1
PGC_E13_5	SRR609725	PGC_E13_5	PGC	101SE	6250000	PMID: 23151479, 23399596, GEO: GSM1027243	WT rep2
PGC_E13_5	SRR609726	PGC_E13_5	PGC	101SE	16078520	PMID: 23151479, 23399596, GEO: GSM1027243	WT rep2
PGC_E13_5	SRR609727	PGC_E13_5	PGC	101SE	13916803	PMID: 23151479, 23399596, GEO: GSM1027243	WT rep2
PGC_E13_5	SRR609728	PGC_E13_5	PGC	101SE	17157528	PMID: 23151479, 23399596, GEO: GSM1027244	WT rep3
PGC_E13_5	SRR609729	PGC_E13_5	PGC	101SE	17659275	PMID: 23151479, 23399596, GEO: GSM1027244	WT rep3
PGC_E13_5	SRR609730	PGC_E13_5	PGC	101SE	15384327	PMID: 23151479, 23399596, GEO: GSM1027244	WT rep3
PGC_E13_5	SRR649335	PGC_E13_5	PGC	101SE	11266408	PMID: 23151479, 23399596, GEO: GSM1064457	E13.5_m_1
PGC_E13_5	SRR649336	PGC_E13_5	PGC	101SE	11609403	PMID: 23151479, 23399596, GEO: GSM1064457	E13.5_m_1
PGC_E13_5	SRR649337	PGC_E13_5	PGC	101SE	10127168	PMID: 23151479, 23399596, GEO: GSM1064457	E13.5_m_1
PGC_E13_5	SRR649338	PGC_E13_5	PGC	101SE	16863897	PMID: 23151479, 23399596, GEO: GSM1064458	E13.5_m_2
PGC_E13_5	SRR649339	PGC_E13_5	PGC	101SE	17361174	PMID: 23151479, 23399596, GEO: GSM1064458	E13.5_m_2
PGC_E13_5	SRR649340	PGC_E13_5	PGC	101SE	15237291	PMID: 23151479, 23399596, GEO: GSM1064458	E13.5_m_2
PGC_E13_5	SRR649341	PGC_E13_5	PGC	101SE	12588998	PMID: 23151479, 23399596, GEO: GSM1064459	E13.5_m_3
PGC_E13_5	SRR649342	PGC_E13_5	PGC	101SE	12967532	PMID: 23151479, 23399596, GEO: GSM1064459	E13.5_m_3
PGC_E13_5	SRR649343	PGC_E13_5	PGC	101SE	11353650	PMID: 23151479, 23399596, GEO: GSM1064459	E13.5_m_3
PGC_E9_5_11_5	SRR648686	PGC_E9_5_11_5	PGC	101SE	10659160	PMID: 23151479, 23399596, GEO: GSM1064148	E9.5_1 2
PGC_E9_5_11_5	SRR648687	PGC_E9_5_11_5	PGC	101SE	11000360	PMID: 23151479, 23399596, GEO: GSM1064148	E9.5_1 2
PGC_E9_5_11_5	SRR648688	PGC_E9_5_11_5	PGC	101SE	9535853	PMID: 23151479, 23399596, GEO: GSM1064148	E9.5_1 2
PGC_E9_5_11_5	SRR648689	PGC_E9_5_11_5	PGC	101SE	12978554	PMID: 23151479, 23399596, GEO: GSM1064149	E9.5_2
PGC_E9_5_11_5	SRR648690	PGC_E9_5_11_5	PGC	101SE	13363443	PMID: 23151479, 23399596, GEO: GSM1064149	E9.5_2
PGC_E9_5_11_5	SRR648691	PGC_E9_5_11_5	PGC	101SE	11561435	PMID: 23151479, 23399596, GEO: GSM1064149	E9.5_2
PGC_E9_5_11_5	SRR648692	PGC_E9_5_11_5	PGC	101SE	11284521	PMID: 23151479, 23399596, GEO: GSM1064150	E11.5_1
PGC_E9_5_11_5	SRR648693	PGC_E9_5_11_5	PGC	101SE	11571073	PMID: 23151479, 23399596, GEO: GSM1064150	E11.5_1
PGC_E9_5_11_5	SRR648694	PGC_E9_5_11_5	PGC	101SE	10043334	PMID: 23151479, 23399596, GEO: GSM1064150	E11.5_1
PGC_E9_5_11_5	SRR648695	PGC_E9_5_11_5	PGC	101SE	14217677	PMID: 23151479, 23399596, GEO: GSM1064151	E11.5_2
PGC_E9_5_11_5	SRR648696	PGC_E9_5_11_5	PGC	101SE	14657420	PMID: 23151479, 23399596, GEO: GSM1064151	E11.5_2
PGC_E9_5_11_5	SRR648697	PGC_E9_5_11_5	PGC	101SE	12819417	PMID: 23151479, 23399596, GEO: GSM1064151	E11.5_2
Testis_b	SRR306775	Testis	Testis	76SE	19973708	PMID: 22012392 GEO: GSM752629	mmu ts M 1
Testis_b	SRR306776	Testis	Testis	76SE	29762970	PMID: 22012392 GEO: GSM752630	mmu ts M 2
Testis_b	SRR453140	Testis	Testis	76PE	37696007	GEO: GSM900193	CSHL_RnaSeq_Testis_adult-8wks
Testis_b	SRR453141	Testis	Testis	76PE	35861103	GEO: GSM900193	CSHL_RnaSeq_Testis_adult-8wks
Testis_b	SRR453142	Testis	Testis	76PE	41120376	GEO: GSM900193	CSHL_RnaSeq_Testis_adult-8wks
Testis_b	SRR453143	Testis	Testis	76PE	36086152	GEO: GSM900193	CSHL_RnaSeq_Testis_adult-8wks
Testis_a	SRR594401	Testis	Testis	50PE	109,199,938	PMID: 23258891 GEO: GSM1020648	mouse_a_testes
Testis_a	SRR594409	Testis	Testis	80PE	116,525,147	PMID: 23258891 GEO: GSM1020656	mouse_b_testes
Testis_c	SRR5171085	Testis	Testis	101PE	30611590	GEO: GSM2453435	ENCODE biosample ENCBS928FOT, testis, 10 week, strain C57BL/6J, donor ENCDO072AAA; polyA mRNA
Testis_c	SRR5171084	Testis	Testis	100/102PE	52230061	GEO: GSM2453434	ENCODE biosample ENCBS928FOT, testis, 10 week, strain C57BL/6J, donor ENCDO072AAA; polyA mRNA
Testis_c	SRR5128065	Testis	Testis	100PE	41478349	GEO: GSM2439067	Testis, 25 days, strain C57BL/6J, WT; mirVana RNA isolation kit
Testis_c	SRR5128064	Testis	Testis	100PE	32681336	GEO: GSM2439066	Testis, 25 days, strain C57BL/6J, WT; mirVana RNA isolation kit
Testis_c	SRR5128063	Testis	Testis	100PE	32556779	GEO: GSM2439065	Testis, 25 days, strain C57BL/6J, WT; mirVana RNA isolation kit
Testis_c	SRR5128062	Testis	Testis	100PE	34254459	GEO: GSM2439064	Testis, 25 days, strain C57BL/6J, WT; mirVana RNA isolation kit
Testis_c	SRR5128061	Testis	Testis	100PE	35669488	GEO: GSM2439063	Testis, 25 days, strain C57BL/6J, WT; mirVana RNA isolation kit
Testis_c	SRR5128060	Testis	Testis	100PE	36895595	GEO: GSM2439062	Testis, 25 days, strain C57BL/6J, WT; mirVana RNA isolation kit
Embr_Limb_E14_5	SRR567490	Limb_E14_5	EmbrTissues	101PE	170903264	GEO: GSM1000568	CSHL_RnaSeq_Limb_E14.5
Embr_Liver_E14_5	SRR567496	Liver_E14_5	EmbrTissues	101PE	156381988	GEO: GSM1000571	CSHL_RnaSeq_Liver_E14.5
NPC_a	SRR040004	NPC	NPC	76PE	31866618	PMID: 20436462, GEO: GSM521652	NPC_RNASeq
NPC_a	SRR040005	NPC	NPC	76PE	28161376	PMID: 20436462, GEO: GSM521652	NPC_RNASeq
NPC_a	SRR972723	NPC	NPC	99PE	25341699	PRJNA207664	primary NPC culture from brain, female, 3 month, strain C57BL/6
NPC_a	SRR972721	NPC	NPC	99PE	21744303	PRJNA207664	primary NPC culture from brain, female, 3 month, strain C57BL/6
NPC_a	SRR972720	NPC	NPC	99PE	21185705	PRJNA207664	primary NPC culture from brain, female, 3 month, strain C57BL/6
NPC_a	SRR972459	NPC	NPC	99PE	22340761	PRJNA207664	primary NPC culture from brain, female, 3 month, strain C57BL/6
NPC_c	SRR5027804	NPC	NPC	50SE	38899392	GEO: GSM2393932	NPC derived from J1 ESC, WT
NPC_c	SRR5027805	NPC	NPC	50SE	39984549	GEO: GSM2393933	NPC derived from J1 ESC, WT
NPC_c	SRR5032657	NPC	NPC	51SE	21625375	GEO: GSM2395772	NPC, strain B6x129SvJ, WT
NPC_c	SRR5032656	NPC	NPC	51SE	16742942	GEO: GSM2395771	NPC, strain B6x129SvJ, WT
NPC_c	SRR5032655	NPC	NPC	51SE	19568813	GEO: GSM2395770	NPC, strain B6x129SvJ, WT
NPC_c	SRR4994220	NPC	NPC	51PE	34865622	GEO: GSM2384803	NPC_control_siRNA, V6.5, ESC-derived
NPC_c	SRR4994219	NPC	NPC	51PE	34057587	GEO: GSM2384802	NPC_control_siRNA, V6.5, ESC-derived
NPC_d	SRR4270483	NPC	NPC	75PE	31167236	GEO: GSM2322611	neuronal progenitor cells (NPCs), strain 129S1/CASTEiJ
NPC_d	SRR4270482	NPC	NPC	75PE	26609673	GEO: GSM2322610	neuronal progenitor cells (NPCs), strain 129S1/CASTEiJ
NPC_d	SRR4270481	NPC	NPC	75PE	139381000	GEO: GSM2322609	neuronal progenitor cells (NPCs), strain 129S1/CASTEiJ
Ventricular_Zone	SRR314802	NPC	NPC	74SE	25406840	PMID: 21873192, GEO: GSM763480	VZ-1-1
Ventricular_Zone	SRR314803	NPC	NPC	74SE	24553842	PMID: 21873192, GEO: GSM763481	VZ-1-2
Ventricular_Zone	SRR314808	NPC	NPC	74SE	28480020	PMID: 21873192, GEO: GSM763486	VZ-2-1
Ventricular_Zone	SRR314809	NPC	NPC	74SE	27308456	PMID: 21873192, GEO: GSM763487	VZ-2-2
Embr_Brain_E11_5	SRR567500	Brain_E11_5	EmbrBrain	101PE	204144434	GEO: GSM1000573	CSHL_RnaSeq_CNS_E11.5
Embr_Brain_E14_5	SRR567493	Brain_E14_5	EmbrBrain	101PE	221581975	GEO: GSM1000569	CSHL_RnaSeq_CNS_E14
Embr_Cortex_E17_5	SRR531311	Cortex_E17_5	EmbrBrain	80SE	45645335	PMID: 23416452, GEO: GSM980532	Embryonic1
Embr_Cortex_E17_5	SRR531312	Cortex_E17_5	EmbrBrain	80SE	48670742	PMID: 23416452, GEO: GSM980533	Embryonic2
Embr_Cortex_E17_5	SRR531313	Cortex_E17_5	EmbrBrain	80SE	49766117	PMID: 23416452, GEO: GSM980534	Embryonic3
Embr_Cortex_E17_5	SRR531314	Cortex_E17_5	EmbrBrain	80SE	48553967	PMID: 23416452, GEO: GSM980535	Embryonic4
Whole_Brain_a	SRR579545	Whole_Brain	Neural	72PE	80356932	PMID: 23258890, GEO: GSM1015150	Mouse brain rep1
Whole_Brain_a	SRR579546	Whole_Brain	Neural	72PE	60754549	PMID: 23258890, GEO: GSM1015151	Mouse brain rep2
Whole_Brain_a	SRR306757	Whole_Brain	Neural	76SE	25094445	PMID: 22012392, GEO: GSM752614	mmu br F 1
Whole_Brain_a	SRR306758	Whole_Brain	Neural	76SE	18882745	PMID: 22012392, GEO: GSM752615	mmu br M 1
Whole_Brain_a	SRR306759	Whole_Brain	Neural	76SE	20757817	PMID: 22012392, GEO: GSM752615	mmu br M 1
Whole_Brain_a	SRR306760	Whole_Brain	Neural	76SE	17770683	PMID: 22012392, GEO: GSM752615	mmu br M 1
Whole_Brain_a	SRR306761	Whole_Brain	Neural	76SE	18759557	PMID: 22012392, GEO: GSM752615	mmu br M 1
Whole_Brain_a	SRR306762	Whole_Brain	Neural	76SE	19726026	PMID: 22012392, GEO: GSM752616	mmu br M 2
Whole_Brain_a	SRR533617	Whole_Brain	Neural	50SE	13934032	PMID: 22901804, GEO: GSM981185	brainWT1
Whole_Brain_a	SRR533618	Whole_Brain	Neural	50SE	13981344	PMID: 22901804, GEO: GSM981186	brainWT2
Whole_Brain_a	SRR533619	Whole_Brain	Neural	50SE	16466452	PMID: 22901804, GEO: GSM981187	brainWT3
Whole_Brain_a	SRR533620	Whole_Brain	Neural	50SE	12459003	PMID: 22901804, GEO: GSM981188	brainWT4
Whole_Brain_a	SRR533621	Whole_Brain	Neural	50SE	15259755	PMID: 22901804, GEO: GSM981189	brainWT5
Whole_Brain_b	SRR594393	Whole_Brain	Neural	50PE	87264604	PMID: 23258891, GEO: GSM1020640	mouse_a_brain
Whole_Brain_b	SRR594402	Whole_Brain	Neural	80PE	118824353	PMID: 23258891, GEO: GSM1020649	mouse_b_brain
Cortex_a	SRR531315	Cortex	Neural	80SE	38114212	PMID: 23416452, GEO: GSM980536	Adult1
Cortex_a	SRR531316	Cortex	Neural	80SE	38714208	PMID: 23416452, GEO: GSM980537	Adult2
Cortex_a	SRR531317	Cortex	Neural	80SE	45935261	PMID: 23416452, GEO: GSM980538	Adult3
Cortex_b	ERR1709720	Cortex	Neural	100SE	34223481	PRJEB16747	Cortex-m2_s, ERS1422708, 3 months, male
Cortex_b	ERR1709719	Cortex	Neural	100SE	41627944	PRJEB16747	Cortex-m1_s, ERS1422707, 3 months, male
Cortex_b	ERR1709718	Cortex	Neural	100SE	61215499	PRJEB16747	Cortex-f2_s, ERS1422706. 3 months, female
Cortex_b	ERR1709717	Cortex	Neural	100SE	52354227	PRJEB16747	Cortex-f1_s, ERS1422705, 3 months, female
Frontal_Lobe	SRR567478	Frontal_Lobe	Neural	101PE	185745131	GEO: GSM1000562	CSHL_RnaSeq_FrontalLobe_adult-8wks
Cerebellum_a	SRR306763	Cerebellum	Neural	76SE	41340785	PMID: 22012392, GEO: GSM752617	mmu cb F 1
Cerebellum_a	SRR306764	Cerebellum	Neural	76SE	20947739	PMID: 22012392, GEO: GSM752618	mmu cb M 1
Cerebellum_a	SRR306765	Cerebellum	Neural	76SE	28710250	PMID: 22012392, GEO: GSM752619	mmu cb M 2
Cerebellum_a	SRR567488	Cerebellum	Neural	101PE	150974801	GEO: GSM1000567	CSHL_RnaSeq_Cerebellum_adult-8wks
Cerebellum_b	ERR1709716	Cerebellum	Neural	100SE	32939954	PRJEB16747	Cerebellum-m2_s, ERS1422704, 3 months, male
Cerebellum_b	ERR1709715	Cerebellum	Neural	100SE	31525033	PRJEB16747	Cerebellum-m1_s, ERS1422703, 3 months, male
Cerebellum_b	ERR1709714	Cerebellum	Neural	100SE	59992036	PRJEB16747	Cerebellum-f2_s, ERS1422702, 3 months, female
Cerebellum_b	ERR1709713	Cerebellum	Neural	100SE	46473861	PRJEB16747	Cerebellum-f1_s, ERS1422701, 3 months, female
Cerebellum_c	SRR5048026	Cerebellum	Neural	101PE	144705041	GEO: GSM2400103	ENCODE biosample ENCBS249ENC, pooled male and female, 8 week, donor ENCDO072AAA, strain C57BL/6J
Cerebellum_c	SRR5048025	Cerebellum	Neural	101PE	150974801	GEO: GSM2400102	ENCODE biosample ENCBS248ENC, pooled male and female, 8 week, donor ENCDO072AAA, strain C57BL/6J
Retina_a	SRR327045	Retina	Neural	120PE	26552894	PMID: 21775302, GEO: GSM663550	retina_2 months_lane_1
Retina_a	SRR327047	Retina	Neural	120PE	25595642	PMID: 21775302, GEO: GSM663553	retina_2 months_lane_4
Retina_a	SRR342457	Retina	Neural	120PE	25473434	PMID: 21775302, GEO: GSM663551	retina_2 months_lane_2
Retina_a	SRR342458	Retina	Neural	120PE	26546886	PMID: 21775302, GEO: GSM663552	retina_2 months_lane_3
Retina_b	SRR3957215	Retina	Neural	53SE	51869964	PMID: 27506984, GEO: GSM2254318	Retina tissue-WT3, strain C57BL6/J, biological replicate 3, tech replicate 2
Retina_b	SRR3957214	Retina	Neural	53SE	41834348	PMID: 27506984, GEO: GSM2254317	Retina tissue-WT2, strain C57BL6/J, biological replicate 3, tech replicate 1
Retina_b	SRR3957213	Retina	Neural	53SE	67304114	PMID: 27506984, GEO: GSM2254316	Retina tissue-WT1, strain C57BL6/J, biological replicate 2, tech replicate 2
Retina_b	SRR3957212	Retina	Neural	53SE	54796885	PMID: 27506984, GEO: GSM2254315	Retina tissue-WT3, strain C57BL6/J, biological replicate 2, tech replicate 1
Retina_b	SRR3957211	Retina	Neural	53SE	54578534	PMID: 27506984, GEO: GSM2254314	Retina tissue-WT2, strain C57BL6/J, biological replicate 1, tech replicate 2
Retina_b	SRR3957210	Retina	Neural	53SE	46818050	PMID: 27506984, GEO: GSM2254313	Retina tissue-WT1, strain C57BL6/J, biological replicate 1, tech replicate 1
Retina_c	SRR3129959	Retina	Neural	110PE	22281847	PRJNA310040	WT, Retina, female, 50 days, strain C57BL/6J
Retina_c	SRR3129957	Retina	Neural	110PE	22211734	PRJNA310040	WT, Retina, female, 50 days, strain C57BL/6J
Retina_c	SRR3129956	Retina	Neural	110PE	20766401	PRJNA310040	WT, Retina, female, 50 days, strain C57BL/6J
Retina_c	SRR3129955	Retina	Neural	110PE	20688888	PRJNA310040	WT, Retina, female, 50 days, strain C57BL/6J
Retina_c	SRR3129954	Retina	Neural	110PE	22414205	PRJNA310040	WT, Retina, female, 50 days, strain C57BL/6J
Retina_c	SRR3129946	Retina	Neural	110PE	22394642	PRJNA310040	WT, Retina, female, 50 days, strain C57BL/6J
Retina_c	SRR3129944	Retina	Neural	110PE	23487845	PRJNA310040	WT, Retina, female, 50 days, strain C57BL/6J
Retina_c	SRR3129945	Retina	Neural	110PE	23534503	PRJNA310040	WT, Retina, female, 50 days, strain C57BL/6J
Eye_a	SRR504764	Eye	Tissues	54SE	19882953	PMID: 27506984, 22797304, GEO: GSM945628	debarshi_AJ1
Eye_a	SRR504765	Eye	Tissues	54SE	22481582	PMID: 27506984, 22797304, GEO: GSM945629	debarshi_AJ2
Eye_a	SRR504766	Eye	Tissues	54SE	21670712	PMID: 27506984, 22797304, GEO: GSM945630	debarshi_AJ3
Eye_a	SRR504767	Eye	Tissues	79SE	52287242	PMID: 27506984, 22797304, GEO: GSM945631	debarshi_Balb-C-1
Eye_a	SRR504768	Eye	Tissues	79SE	51933681	PMID: 27506984, 22797304, GEO: GSM945632	debarshi_Balb-C-2
Eye_a	SRR504769	Eye	Tissues	79SE	37553705	PMID: 27506984, 22797304, GEO: GSM945633	debarshi_Balb-C-3
Eye_b	SRR2005805	Eye	Tissues	50SE	47602663	PMID: 26626567, GEO: GSM1673351	Eye, subjective day, strain C3H
Eye_b	SRR2005806	Eye	Tissues	50SE	46972433	PMID: 26626567, GEO: GSM1673352	Eye, subjective day, strain C3H
Eye_b	SRR2005807	Eye	Tissues	50SE	50260133	PMID: 26626567, GEO: GSM1673353	Eye, objective day, strain C3H
Eye_b	SRR2005808	Eye	Tissues	50SE	48854725	PMID: 26626567, GEO: GSM1673354	Eye, objective day, strain C3H
Eye_c	SRR1691203	Eye	Tissues	101SE	23641820	PMID: 25616964, GEO: GSM1557916	Eye, post natal day 21, strain C57BL/6, WT
Eye_c	SRR1691202	Eye	Tissues	101SE	25554790	PMID: 25616964, GEO: GSM1557915	Eye, post natal day 21, strain C57BL/6, WT
Eye_c	SRR1691201	Eye	Tissues	101SE	34934887	PMID: 25616964, GEO: GSM1557914	Eye, post natal day 21, strain C57BL/6, WT
Eye_c	SRR940247	Eye	Tissues	79SE	37064866	PMID: 27875314, 27506984, 23913857, GEO: GSM1190974	Whole Eye, strain C57BL/6J, 9.0 hours after light onset
Eye_c	SRR940246	Eye	Tissues	79SE	48171083	PMID: 27875314, 27506984, 23913857, GEO: GSM1190973	Whole Eye, strain C57BL/6J, 9.0 hours after light onset
Eye_c	SRR940245	Eye	Tissues	79SE	54069069	PMID: 27875314, 27506984, 23913857, GEO: GSM1190972	Whole Eye, strain C57BL/6J, 9.0 hours after light onset
Eye_c	SRR940244	Eye	Tissues	54SE	17706628	PMID: 27875314, 27506984, 22797304, GEO: GSM1190971	Whole Eye, strain C57BL/6J, 1.5 hours after light onset
Eye_c	SRR940243	Eye	Tissues	54SE	16751165	PMID: 27875314, 27506984, 23913857, GEO: GSM1190970	Whole Eye, strain C57BL/6J, 1.5 hours after light onset
Neurons_a	SRR359852	Neurons	Neural	52SE	19791890	PMID: 22272348, GEO: GSM824791	DRG1
Neurons_a	SRR359853	Neurons	Neural	52SE	20177648	PMID: 22272348, GEO: GSM824791	DRG1
Neurons_a	SRR359854	Neurons	Neural	52SE	17678640	PMID: 22272348, GEO: GSM824792	DRG2
Neurons_a	SRR359855	Neurons	Neural	52SE	18536960	PMID: 22272348, GEO: GSM824792	DRG2
Neurons_a	SRR359856	Neurons	Neural	52SE	18648591	PMID: 22272348, GEO: GSM824793	DRG3
Neurons_a	SRR359857	Neurons	Neural	52SE	19332386	PMID: 22272348, GEO: GSM824793	DRG3
Neurons_a	SRR359858	Neurons	Neural	52SE	19852267	PMID: 22272348, GEO: GSM824794	CGN1
Neurons_a	SRR359859	Neurons	Neural	52SE	21505676	PMID: 22272348, GEO: GSM824794	CGN1
Neurons_a	SRR359860	Neurons	Neural	52SE	22375948	PMID: 22272348, GEO: GSM824795	CGN2
Neurons_a	SRR359861	Neurons	Neural	52SE	22376135	PMID: 22272348, GEO: GSM824795	CGN2
Neurons_b	SRR1033785	Neurons	Neural	101PE	37893137	PMID: 25186741 GEO: GSM1269905	Neuron1
Neurons_b	SRR1033786	Neurons	Neural	101PE	33941791	PMID: 25186741 GEO: GSM1269906	Neuron2
Neurons_KCl_0h	SRR5031511	Neurons_KCL_0h	Neural	101PE	236372615	PMID: 27984743	Neurons 0h KCl
Neurons_KCl_0h	SRR5031512	Neurons_KCL_0h	Neural	101PE	201939690	PMID: 27984743	Neurons 0h KCl
Neurons_KCl_3h	SRR5031515	Neurons_KCL_3h	Neural	101PE	218708158	PMID: 27984743	Neurons 3h KCl
Neurons_KCl_3h	SRR5031516	Neurons_KCL_3h	Neural	101PE	238493392	PMID: 27984743	Neurons 3h KCl
Astrocytes	SRR1033783	Astrocytes	Glia	101PE	29622912	PMID: 25186741 GEO: GSM1269903	Astrocyte1
Astrocytes	SRR1033784	Astrocytes	Glia	101PE	32018822	PMID: 25186741 GEO: GSM1269904	Astrocyte2
Microglia	SRR1033793	Microglia	Glia	101PE	29172869	PMID: 25186741 GEO: GSM1269913	Microglia1
Microglia	SRR1033794	Microglia	Glia	101PE	30007340	PMID: 25186741 GEO: GSM1269914	Microglia2
OligodPC	SRR1033787	Oligod_PC	Glia	101PE	32231738	PMID: 25186741 GEO: GSM1269907	OPC1
OligodPC	SRR1033788	Oligod_PC	Glia	101PE	32487764	PMID: 25186741 GEO: GSM1269908	OPC2
New_Oligod	SRR1033789	New_Oligod	Glia	101PE	32132363	PMID: 25186741 GEO: GSM1269909	NFO1
New_Oligod	SRR1033790	New_Oligod	Glia	101PE	30547495	PMID: 25186741 GEO: GSM1269910	NFO2
Myelinated_Oligod	SRR1033791	Myelinated_Oligod	Glia	101PE	33438809	PMID: 25186741 GEO: GSM1269911	MO1
Myelinated_Oligod	SRR1033792	Myelinated_Oligod	Glia	101PE	29732990	PMID: 25186741 GEO: GSM1269912	MO2
Myoblast_0h	SRR037945	Myoblast_0h	MyobDif	76PE	22205089	PMID: 20436464, GEO: GSM521256	-24 hours
Myoblast_0h	SRR037946	Myoblast_0h	MyobDif	76PE	19979450	PMID: 20436464, GEO: GSM521256	-24 hours
Myoblast_60h	SRR037947	Myoblast_60h	MyobDif	76PE	24336126	PMID: 20436464 GEO: GSM521257	60 hours
Myoblast_60h	SRR037948	Myoblast_60h	MyobDif	76PE	22868507	PMID: 20436464 GEO: GSM521257	60 hours
Myoblast_60h	SRR037949	Myoblast_60h	MyobDif	76PE	22987398	PMID: 20436464 GEO: GSM521257	60 hours
Myoblast_120h	SRR037950	Myoblast_120h	MyobDif	76PE	19115416	PMID: 20436464 GEO: GSM521258	120 hours
Myoblast_120h	SRR037951	Myoblast_120h	MyobDif	76PE	21953690	PMID: 20436464 GEO: GSM521258	120 hours
Myoblast_168h	SRR037952	Myoblast_168h	MyobDif	76PE	18567994	PMID: 20436464 GEO: GSM521259	168 hours
Myoblast_168h	SRR037953	Myoblast_168h	MyobDif	76PE	20159779	PMID: 20436464 GEO: GSM521259	168 hours
Myoblast_168h	SRR037954	Myoblast_168h	MyobDif	76PE	23060060	PMID: 20436464 GEO: GSM521259	168 hours
CL_C2C12_a	SRR2318663	CL_C2C12	CLines	75SE	18606536	GEO: GSM1873363	C2C12 cells
CL_C2C12_a	SRR2318665	CL_C2C12	CLines	75SE	18044937	GEO: GSM1873363	C2C12 cells
CL_C2C12_a	SRR2226232	CL_C2C12	CLines	100PE	26299166	PMID: 28091529, GEO: GSM1865851	differentiating C2C12 myoblasts - control, C2C12
CL_C2C12_a	DRR022419	CL_C2C12	CLines	101PE	51619906	PRJDB3075	C2C12 WT
CL_C2C12_b	SRR2071839	CL_C2C12	CLines	51PE	127373754	GEO: GSM1716677	C2C12, Ctl
CL_C2C12_b	SRR2071838	CL_C2C12	CLines	51PE	72083499	GEO: GSM1716676	C2C12, Ctl
CL_C2C12_b	SRR2071837	CL_C2C12	CLines	51PE	53921461	GEO: GSM1716675	C2C12, Ctl
Muscle_a	SRR579550	Muscle	Muscle	75PE	79026285	PMID: 23258890 GEO: GSM1015155	Mouse skeletal muscle
Muscle_a	SRR533639	Muscle	Muscle	50PE	10982672	PMID: 22901804 GEO: GSM981205	muscleWT1
Muscle_a	SRR533640	Muscle	Muscle	50PE	10753425	PMID: 22901804 GEO: GSM981206	muscleWT2
Muscle_a	SRR533641	Muscle	Muscle	50PE	9635391	PMID: 22901804 GEO: GSM981207	muscleWT3
Muscle_a	SRR533642	Muscle	Muscle	50PE	10314063	PMID: 22901804 GEO: GSM981208	muscleWT4
Muscle_a	SRR533643	Muscle	Muscle	50PE	10121091	PMID: 22901804 GEO: GSM981209	muscleWT5
Muscle_b	SRR594399	Muscle	Muscle	50PE	113111277	PMID: 23258891 GEO: GSM1020646	mouse_a_skm
Muscle_b	SRR594407	Muscle	Muscle	80PE	117171737	PMID: 23258891 GEO: GSM1020654	mouse_b_skm
Muscle_c	SRR3705528	Muscle	Muscle	51SE	51759718	PMID: 27624101, GEO: GSM2208783	Biceps femoris skeletal muscle, WT, male, 5 weeks, strain C57BL/6J, Wild type sample 956
Muscle_c	SRR3705527	Muscle	Muscle	51SE	43238503	PMID: 27624101, GEO: GSM2208782	Biceps femoris skeletal muscle, WT, male, 5 weeks, strain C57BL/6J, Wild type sample 955
Muscle_c	SRR3705524	Muscle	Muscle	51SE	46607224	PMID: 27624101, GEO: GSM2208779	Biceps femoris skeletal muscle, WT, male, 5 weeks, strain C57BL/6J, Wild type sample 927
Muscle_c	SRR3705520	Muscle	Muscle	51SE	42539250	PMID: 27624101, GEO: GSM2208775	Biceps femoris skeletal muscle, WT, male, 5 weeks, strain C57BL/6J, Wild type sample 912
Muscle_c	SRR3705519	Muscle	Muscle	51SE	32620433	PMID: 27624101, GEO: GSM2208774	Biceps femoris skeletal muscle, WT, male, 5 weeks, strain C57BL/6J, Wild type sample 911
Heart_a	SRR579549	Heart	Muscle	76PE	38701291	PMID: 23258890 GEO: GSM1015154	Mouse heart
Heart_a	SRR306766	Heart	Muscle	76SE	44668984	PMID: 22012392 GEO: GSM752620	mmu ht F 1
Heart_a	SRR306767	Heart	Muscle	76SE	24493681	PMID: 22012392 GEO: GSM752621	mmu ht M 1
Heart_a	SRR306768	Heart	Muscle	76SE	25903961	PMID: 22012392 GEO: GSM752622	mmu ht M 2
Heart_a	SRR533627	Heart	Muscle	50SE	13107864	PMID: 22901804 GEO: GSM981195	heartWT1
Heart_a	SRR533628	Heart	Muscle	50SE	15545243	PMID: 22901804 GEO: GSM981196	heartWT2
Heart_a	SRR533629	Heart	Muscle	50SE	13955243	PMID: 22901804 GEO: GSM981196	heartWT2
Heart_a	SRR533630	Heart	Muscle	50SE	15629927	PMID: 22901804 GEO: GSM981197	heartWT3
Heart_a	SRR533631	Heart	Muscle	50SE	12351921	PMID: 22901804 GEO: GSM981197	heartWT3
Heart_a	SRR533632	Heart	Muscle	50SE	13563047	PMID: 22901804 GEO: GSM981198	heartWT4
Heart_a	SRR533633	Heart	Muscle	50SE	9681738	PMID: 22901804 GEO: GSM981199	heartWT5
Heart_b	SRR453172	Heart	Muscle	76PE	39038956	GEO: GSM900199	CSHL_RnaSeq_Heart_adult-8wks
Heart_b	SRR453173	Heart	Muscle	76PE	35570309	GEO: GSM900199	CSHL_RnaSeq_Heart_adult-8wks
Heart_b	SRR453174	Heart	Muscle	76PE	41443334	GEO: GSM900199	CSHL_RnaSeq_Heart_adult-8wks
Heart_b	SRR453175	Heart	Muscle	76PE	39528591	GEO: GSM900199	CSHL_RnaSeq_Heart_adult-8wks
Heart_c	SRR5171077	Heart	Muscle	101PE	29892315	GEO: GSM2453425	ENCODE biosample ENCBS183QIH, heart, 10 week, female, donor ENCDO072AAA
Heart_c	SRR5171076	Heart	Muscle	101PE	25489392	GEO: GSM2453424	ENCODE biosample ENCBS183QIH, heart, 10 week, female, donor ENCDO072AAA
Heart_c	SRR5047923	Heart	Muscle	76PE	41443334	GEO: GSM2400059	ENCODE biosample ENCBS268ENC, heart, pooled male and female, 8 week, donor ENCDO072AAA
Heart_c	SRR5047924	Heart	Muscle	76PE	39528591	GEO: GSM2400059	ENCODE biosample ENCBS268ENC, heart, pooled male and female, 8 week, donor ENCDO072AAA
Heart_c	SRR5047921	Heart	Muscle	76PE	39038956	GEO: GSM2400058	ENCODE biosample ENCBS268ENC, heart, pooled male and female, 8 week, donor ENCDO072AAA
Heart_c	SRR5047922	Heart	Muscle	76PE	35570309	GEO: GSM2400058	ENCODE biosample ENCBS268ENC, heart, pooled male and female, 8 week, donor ENCDO072AAA
Heart_d	SRR4427423	Heart	Muscle	76/0PE?	121736838	PRJNA348637	Heart, male, 4 month, strain C57BL/6, WT, kept in normoxia for 2 week
Heart_d	SRR4427422	Heart	Muscle	76/0PE?	129156762	PRJNA348637	Heart, male, 4 month, strain C57BL/6, WT, kept in normoxia for 2 week
Placenta_a	SRR567485	Placenta	Placental	101PE	237925260	GEO: GSM1000565	CSHL_RnaSeq_Placenta_adult-8wks
Placenta_c	SRR5048034	Placenta	Placental	101PE	233233461	GEO: GSM2400109	ENCODE biosample ENCBS352ENC, placenta, 8 week, strain C57BL/6J, donor ENCDO072AAA
Placenta_d	SRR3304964	Placenta	Placental	75PE	113181391	GEO: GSM2100280	WT E10.5
Placenta_d	SRR2895337	Placenta	Placental	59SE	20505066	PMID: 26584622	Placenta wt E10.5, strain ICR
Placenta_d	SRR2895338	Placenta	Placental	61SE	23246890	PMID: 26584622	Placenta wt E10.5, strain ICR
Placenta_d	SRR2895336	Placenta	Placental	50SE	18860707	PMID: 26584622	Placenta wt E10.5, strain ICR
Stomach_a	SRR453093	Stomach	Digestive_tract	76PE	26247173	GEO: GSM900185	CSHL_RnaSeq_Stomach_adult-8wks
Stomach_a	SRR453094	Stomach	Digestive_tract	76PE	27117124	GEO: GSM900185	CSHL_RnaSeq_Stomach_adult-8wks
Stomach_a	SRR453095	Stomach	Digestive_tract	76PE	24350661	GEO: GSM900185	CSHL_RnaSeq_Stomach_adult-8wks
Stomach_a	SRR453096	Stomach	Digestive_tract	76PE	29667455	GEO: GSM900185	CSHL_RnaSeq_Stomach_adult-8wks
Stomach_a	SRR453097	Stomach	Digestive_tract	76PE	33861022	GEO: GSM900185	CSHL_RnaSeq_Stomach_adult-8wks
Stomach_a	SRR453098	Stomach	Digestive_tract	76PE	27307130	GEO: GSM900185	CSHL_RnaSeq_Stomach_adult-8wks
Stomach_b	SRR3737441	Stomach	Digestive_tract	51SE	34290573	PMID: 27498859, GEO: GSM2224572	stomach, 8 weeks, strain C57BL/6 x 129 mixed, WT
Stomach_b	SRR3737440	Stomach	Digestive_tract	51SE	37506755	PMID: 27498859, GEO: GSM2224571	stomach, 8 weeks, strain C57BL/6 x 129 mixed, WT
Stomach_b	SRR3737439	Stomach	Digestive_tract	51SE	29614137	PMID: 27498859, GEO: GSM2224570	stomach, 8 weeks, strain C57BL/6 x 129 mixed, WT
Stomach_b	SRR2485273	Stomach	Digestive_tract	50SE	26780660	GEO: GSM1891196	Intact stomach tissue, 2-3 months, strain C57BL/6
Stomach_b	SRR2485272	Stomach	Digestive_tract	50SE	15764220	GEO: GSM1891195	Uninjured stomach tissue, 2-3 months, strain C57BL/6
Stomach_b	SRR2485271	Stomach	Digestive_tract	75SE	23560296	GEO: GSM1891194	Uninjured stomach tissue, 2-3 months, strain C57BL/6
Stomach_b	SRR2485270	Stomach	Digestive_tract	75SE	21073140	GEO: GSM1891193	Uninjured stomach tissue, 2-3 months, strain C57BL/6
Stomach_b	SRR2485269	Stomach	Digestive_tract	75SE	21912454	GEO: GSM1891192	Uninjured stomach tissue, 2-3 months, strain C57BL/6
Stomach_c	SRR2073161	Stomach	Digestive_tract	100PE	28122210	PMID: 26888865, GEO: GSM1717425	Normal glandular stomach, 40-50 weeks, strain C57BL/6, WT
Stomach_c	SRR2073160	Stomach	Digestive_tract	100PE	26506019	PMID: 26888865, GEO: GSM1717424	Normal glandular stomach, 40-50 weeks, strain C57BL/6, WT
Stomach_c	SRR2073159	Stomach	Digestive_tract	100PE	25563604	PMID: 26888865, GEO: GSM1717423	Normal glandular stomach, 40-50 weeks, strain C57BL/6, WT
Stomach_c	SRR1181778	Stomach	Digestive_tract	101PE	15228887	PRJNA237340	Stomach, male, 6 month, strain 129S1/SvImJ, WT
Colon_a	SRR453166	Colon	Digestive_tract	76PE	27991390	ENCODE project, GEO: GSM900198	CSHL_RnaSeq_Colon_adult-8wks
Colon_a	SRR453167	Colon	Digestive_tract	76PE	24235072	ENCODE project, GEO: GSM900198	CSHL_RnaSeq_Colon_adult-8wks
Colon_a	SRR453168	Colon	Digestive_tract	76PE	12613067	ENCODE project, GEO: GSM900198	CSHL_RnaSeq_Colon_adult-8wks
Colon_a	SRR453169	Colon	Digestive_tract	76PE	22147682	ENCODE project, GEO: GSM900198	CSHL_RnaSeq_Colon_adult-8wks
Colon_a	SRR453170	Colon	Digestive_tract	76PE	22341444	ENCODE project, GEO: GSM900198	CSHL_RnaSeq_Colon_adult-8wks
Colon_a	SRR453171	Colon	Digestive_tract	76PE	21677098	ENCODE project, GEO: GSM900198	CSHL_RnaSeq_Colon_adult-8wks
Colon_a	SRR594394	Colon	Digestive_tract	50PE	101816491	PMID: 23258891 GEO: GSM1020641	mouse_a_colon
Colon_a	SRR594403	Colon	Digestive_tract	80PE	87447334	PMID: 23258891 GEO: GSM1020650	mouse_b_colon
Colon_b	SRR5017139	Colon	Digestive_tract	101SE	49305659	PRJNA353374	Colon, male, adult, strain C58BL/6, Regular Diet Control 1
Colon_b	SRR5017136	Colon	Digestive_tract	101SE	52854775	PRJNA353374	Colon, male, adult, strain C58BL/6, Regular Diet Control 3
Colon_b	SRR5017129	Colon	Digestive_tract	101SE	50929596	PRJNA353374	Colon, male, adult, strain C58BL/6, Regular Diet Control 2
Colon_b	SRR1777614	Colon	Digestive_tract	50PE	19827530	PMID: 26072395, GEO: GSM1595698	Distal colon, 8 weeks, strain C57BL/6, male
Colon_b	SRR1777613	Colon	Digestive_tract	50PE	28249151	PMID: 26072395, GEO: GSM1595697	Distal colon, 8 weeks, strain C57BL/6, male
Colon_b	SRR1777612	Colon	Digestive_tract	50PE	27062589	PMID: 26072395, GEO: GSM1595696	Distal colon, 8 weeks, strain C57BL/6, male
Colon_c	SRR5047916	Colon	Digestive_tract	76PE	27991390	GEO: GSM2400057	ENCODE biosample ENCBS256ENC, colon, pooled male and female, 8 week, donor ENCDO072AAA, strain C57BL/6J
Colon_c	SRR5047917	Colon	Digestive_tract	76PE	24235072	GEO: GSM2400057	ENCODE biosample ENCBS256ENC, colon, pooled male and female, 8 week, donor ENCDO072AAA, strain C57BL/6J
Colon_c	SRR5047918	Colon	Digestive_tract	76PE	12613067	GEO: GSM2400057	ENCODE biosample ENCBS256ENC, colon, pooled male and female, 8 week, donor ENCDO072AAA, strain C57BL/6J
Colon_c	SRR5047913	Colon	Digestive_tract	76PE	22147682	GEO: GSM2400056	ENCODE biosample ENCBS257ENC, colon, pooled male and female, 8 week, donor ENCDO072AAA, strain C57BL/6J
Colon_c	SRR5047914	Colon	Digestive_tract	76PE	22341444	GEO: GSM2400056	ENCODE biosample ENCBS257ENC, colon, pooled male and female, 8 week, donor ENCDO072AAA, strain C57BL/6J
Colon_c	SRR5047915	Colon	Digestive_tract	76PE	21677098	GEO: GSM2400056	ENCODE biosample ENCBS257ENC, colon, pooled male and female, 8 week, donor ENCDO072AAA, strain C57BL/6J
Colon_c	SRR3322956	Colon	Digestive_tract	50PE	43965490	PMID: 27048750, GEO: GSM2107240	Large intestine, strain C57BL/6, 2-3 months, male (M27Col)
Colon_c	SRR3322955	Colon	Digestive_tract	50PE	56317533	PMID: 27048750, GEO: GSM2107239	Large intestine, strain C57BL/6, 2-3 months, male (M25Col)
Colon_c	SRR3322954	Colon	Digestive_tract	50PE	58777535	PMID: 27048750, GEO: GSM2107238	Large intestine, strain C57BL/6, 2-3 months, male (M24Coll)
Intestine_small_a	SRR453109	Intestine	Digestive_tract	76PE	26175550	ENCODE project, GEO: GSM900187	CSHL_RnaSeq_Duodenum_adult-8wks
Intestine_small_a	SRR453110	Intestine	Digestive_tract	76PE	27587328	ENCODE project, GEO: GSM900187	CSHL_RnaSeq_Duodenum_adult-8wks
Intestine_small_a	SRR453111	Intestine	Digestive_tract	76PE	23122310	ENCODE project, GEO: GSM900187	CSHL_RnaSeq_Duodenum_adult-8wks
Intestine_small_a	SRR453112	Intestine	Digestive_tract	76PE	15183301	ENCODE project, GEO: GSM900187	CSHL_RnaSeq_Duodenum_adult-8wks
Intestine_small_a	SRR453113	Intestine	Digestive_tract	76PE	23888198	ENCODE project, GEO: GSM900187	CSHL_RnaSeq_Duodenum_adult-8wks
Intestine_small_a	SRR453114	Intestine	Digestive_tract	76PE	17258686	ENCODE project, GEO: GSM900187	CSHL_RnaSeq_Duodenum_adult-8wks
Intestine_small_a	SRR453115	Intestine	Digestive_tract	76PE	22692382	ENCODE project, GEO: GSM900187	CSHL_RnaSeq_Duodenum_adult-8wks
Intestine_small_a	SRR453099	Intestine	Digestive_tract	76PE	19631252	ENCODE project, GEO: GSM900186	CSHL_RnaSeq_SmIntestine_adult-8wks. Small intestine
Intestine_small_a	SRR453100	Intestine	Digestive_tract	76PE	17959351	ENCODE project, GEO: GSM900186	CSHL_RnaSeq_SmIntestine_adult-8wks. Small intestine
Intestine_small_a	SRR453101	Intestine	Digestive_tract	76PE	6919337	ENCODE project, GEO: GSM900186	CSHL_RnaSeq_SmIntestine_adult-8wks. Small intestine
Intestine_small_a	SRR453102	Intestine	Digestive_tract	76PE	12967048	ENCODE project, GEO: GSM900186	CSHL_RnaSeq_SmIntestine_adult-8wks. Small intestine
Intestine_small_a	SRR453103	Intestine	Digestive_tract	76PE	12809643	ENCODE project, GEO: GSM900186	CSHL_RnaSeq_SmIntestine_adult-8wks. Small intestine
Intestine_small_a	SRR453104	Intestine	Digestive_tract	76PE	18211911	ENCODE project, GEO: GSM900186	CSHL_RnaSeq_SmIntestine_adult-8wks. Small intestine
Intestine_small_a	SRR453105	Intestine	Digestive_tract	76PE	16967223	ENCODE project, GEO: GSM900186	CSHL_RnaSeq_SmIntestine_adult-8wks. Small intestine
Intestine_small_a	SRR453106	Intestine	Digestive_tract	76PE	5741962	ENCODE project, GEO: GSM900186	CSHL_RnaSeq_SmIntestine_adult-8wks. Small intestine
Intestine_small_a	SRR453107	Intestine	Digestive_tract	76PE	13074061	ENCODE project, GEO: GSM900186	CSHL_RnaSeq_SmIntestine_adult-8wks. Small intestine
Intestine_small_a	SRR453108	Intestine	Digestive_tract	76PE	13775140	ENCODE project, GEO: GSM900186	CSHL_RnaSeq_SmIntestine_adult-8wks. Small intestine
Intestine_small_b	SRR5171081	Intestine	Digestive_tract	100/102PE	38286584	GEO: GSM2453427	ENCODE biosample ENCBS443BDC, small intestine, 10 week, female, strain C57BL/6J, donor ENCDO072AAA
Intestine_small_b	SRR5171080	Intestine	Digestive_tract	101PE	32803922	GEO: GSM2453426	ENCODE biosample ENCBS443BDC, small intestine, 10 week, female, strain C57BL/6J, donor ENCDO072AAA
Intestine_small_b	SRR3083809	Intestine	Digestive_tract	51SE	16749575	GEO: GSM2027190	Small intestine, strain C57BL/6, untreated, wt, rep1
Intestine_small_b	SRR3083810	Intestine	Digestive_tract	51SE	16674875	GEO: GSM2027190	Small intestine, strain C57BL/6, untreated, wt, rep1
Intestine_small_b	SRR3083811	Intestine	Digestive_tract	51SE	14663794	GEO: GSM2027191	Small intestine, strain C57BL/6, untreated, wt, rep2
Intestine_small_b	SRR3083812	Intestine	Digestive_tract	51SE	14582637	GEO: GSM2027191	Small intestine, strain C57BL/6, untreated, wt, rep2
Intestine_small_b	SRR3083813	Intestine	Digestive_tract	51SE	22102095	GEO: GSM2027192	Small intestine, strain C57BL/6, untreated, wt, rep3
Intestine_small_b	SRR3083814	Intestine	Digestive_tract	51SE	21972865	GEO: GSM2027192	Small intestine, strain C57BL/6, untreated, wt, rep3
Intestine_small_b	SRR3083815	Intestine	Digestive_tract	51SE	18475760	GEO: GSM2027193	Small intestine, strain C57BL/6, untreated, wt, rep4
Intestine_small_b	SRR3083816	Intestine	Digestive_tract	51SE	18395232	GEO: GSM2027193	Small intestine, strain C57BL/6, untreated, wt, rep4
Intestine_small_b	SRR3083817	Intestine	Digestive_tract	51SE	12820661	GEO: GSM2027194	Small intestine, strain C57BL/6, untreated, wt, rep5
Intestine_small_b	SRR3083818	Intestine	Digestive_tract	51SE	12751825	GEO: GSM2027194	Small intestine, strain C57BL/6, untreated, wt, rep5
Kidney_a	SRR453144	Kidney	Tissues	76PE	38866777	ENCODE project, GEO: GSM900194	CSHL_RnaSeq_Kidney_adult-8wks
Kidney_a	SRR453145	Kidney	Tissues	76PE	35536674	ENCODE project, GEO: GSM900194	CSHL_RnaSeq_Kidney_adult-8wks
Kidney_a	SRR453146	Kidney	Tissues	76PE	18788286	ENCODE project, GEO: GSM900194	CSHL_RnaSeq_Kidney_adult-8wks
Kidney_a	SRR453147	Kidney	Tissues	76PE	40542680	ENCODE project, GEO: GSM900194	CSHL_RnaSeq_Kidney_adult-8wks
Kidney_a	SRR453148	Kidney	Tissues	76PE	37408520	ENCODE project, GEO: GSM900194	CSHL_RnaSeq_Kidney_adult-8wks
Kidney_a	SRR453149	Kidney	Tissues	76PE	39936163	ENCODE project, GEO: GSM900194	CSHL_RnaSeq_Kidney_adult-8wks
Kidney_a	SRR579548	Kidney	Tissues	75PE	42182481	PMID: 23258890 GEO: GSM1015153	Mouse kidney
Kidney_a	SRR306769	Kidney	Tissues	76SE	45613332	PMID: 22012392 GEO: GSM752623	mmu kd F 1
Kidney_a	SRR306770	Kidney	Tissues	76SE	23639764	PMID: 22012392 GEO: GSM752624	mmu kd M 1
Kidney_a	SRR306771	Kidney	Tissues	76SE	29158234	PMID: 22012392 GEO: GSM752625	mmu kd M 2
Kidney_b	SRR594396	Kidney	Tissues	50PE	119274786	PMID: 23258891 GEO: GSM1020643	mouse_a_kidney
Kidney_b	SRR594404	Kidney	Tissues	80/75PE	118885190	PMID: 23258891 GEO: GSM1020651	mouse_b_kidney
Kidney_c	SRR5171095	Kidney	Tissues	100/102PE	37729075	GEO: GSM2453443	ENCODE biosample ENCBS618GAD, kidney, 10 week, female, donor ENCDO072AAA, strain C57BL/6J
Kidney_c	SRR5171094	Kidney	Tissues	101PE	27023549	GEO: GSM2453442	ENCODE biosample ENCBS618GAD, kidney, 10 week, female, donor ENCDO072AAA, strain C57BL/6J
Kidney_c	SRR2927737	Kidney	Tissues	100PE	79854356	PMID: 26768488, GEO: GSM1931644	kidney, male, 8 week, strain C57BL/6
Kidney_c	SRR2033438	Kidney	Tissues	50SE	35951985	PRJNA280546	Kidney, male, 45 days, strain C57BL/6N
Kidney_c	SRR2033437	Kidney	Tissues	50SE	33767463	PRJNA280546	Kidney, male, 45 days, strain C57BL/6N
Kidney_c	SRR2033436	Kidney	Tissues	50SE	31777935	PRJNA280546
Liver_a	SRR453150	Liver	Tissues	76PE	30461949	ENCODE project, GEO: GSM900195	CSHL_RnaSeq_Liver_adult-8wks
Liver_a	SRR453151	Liver	Tissues	76PE	17894796	ENCODE project, GEO: GSM900195	CSHL_RnaSeq_Liver_adult-8wks
Liver_a	SRR453152	Liver	Tissues	76PE	31913472	ENCODE project, GEO: GSM900195	CSHL_RnaSeq_Liver_adult-8wks
Liver_a	SRR453153	Liver	Tissues	76PE	27549415	ENCODE project, GEO: GSM900195	CSHL_RnaSeq_Liver_adult-8wks
Liver_a	SRR453154	Liver	Tissues	76PE	24234923	ENCODE project, GEO: GSM900195	CSHL_RnaSeq_Liver_adult-8wks
Liver_a	SRR453155	Liver	Tissues	76PE	30633616	ENCODE project, GEO: GSM900195	CSHL_RnaSeq_Liver_adult-8wks
Liver_a	SRR579547	Liver	Tissues	76PE	68224409	PMID: 23258890 GEO: GSM1015152	Mouse liver
Liver_a	SRR306772	Liver	Tissues	76SE	48306727	PMID: 22012392 GEO: GSM752626	mmu lv F 1
Liver_a	SRR306773	Liver	Tissues	76SE	18444416	PMID: 22012392 GEO: GSM752627	mmu lv M 1
Liver_a	SRR306774	Liver	Tissues	76SE	34010208	PMID: 22012392 GEO: GSM752628	mmu lv M 2
Liver_b	SRR594397	Liver	Tissues	50PE	116292478	PMID: 23258891 GEO: GSM1020644	mouse_a_liver
Liver_b	SRR594405	Liver	Tissues	80PE	134045721	PMID: 23258891 GEO: GSM1020652	mouse_b_liver
Liver_c	SRR5379132	Liver	Tissues	101PE	15339261	GEO: GSM2550663	Liver, male, WT, ID 12434
Liver_c	SRR5379131	Liver	Tissues	101PE	23989793	GEO: GSM2550662	Liver, female, WT, ID 12431
Liver_c	SRR5379130	Liver	Tissues	101PE	15760955	GEO: GSM2550661	Liver, female, WT, ID 12430
Liver_c	SRR5379129	Liver	Tissues	101PE	24271598	GEO: GSM2550660	Liver, female, WT, ID 12425
Liver_c	SRR5379128	Liver	Tissues	101PE	23964718	GEO: GSM2550659	Liver, female, WT, ID 12421
Liver_c	SRR5171079	Liver	Tissues	100PE	32182775	GEO: GSM2453429	ENCODE biosample ENCBS391ULH, liver, 10 week, female, strain C57BL/6J, donor ENCDO072AAA
Liver_c	SRR5171078	Liver	Tissues	100PE	26185733	GEO: GSM2453428	ENCODE biosample ENCBS391ULH, liver, 10 week, female, strain C57BL/6J, donor ENCDO072AAA
Adrenal_a	SRR453116	Adrenal	Tissues	76PE	24290092	ENCODE project, GEO: GSM900188	CSHL_RnaSeq_Adrenal_adult-8wks
Adrenal_a	SRR453117	Adrenal	Tissues	76PE	24312747	ENCODE project, GEO: GSM900188	CSHL_RnaSeq_Adrenal_adult-8wks
Adrenal_a	SRR453118	Adrenal	Tissues	76PE	24008508	ENCODE project, GEO: GSM900188	CSHL_RnaSeq_Adrenal_adult-8wks
Adrenal_a	SRR453119	Adrenal	Tissues	76PE	25918689	ENCODE project, GEO: GSM900188	CSHL_RnaSeq_Adrenal_adult-8wks
Adrenal_a	SRR453120	Adrenal	Tissues	76PE	26737304	ENCODE project, GEO: GSM900188	CSHL_RnaSeq_Adrenal_adult-8wks
Adrenal_a	SRR453121	Adrenal	Tissues	76PE	23024785	ENCODE project, GEO: GSM900188	CSHL_RnaSeq_Adrenal_adult-8wks
Adrenal_b	SRR5171111	Adrenal	Tissues	101PE	36616875	PRJNA66167	ENCODE biosample ENCBS816ZVY
Adrenal_b	SRR5171112	Adrenal	Tissues	101PE	22398475	PRJNA66167	ENCODE biosample ENCBS816ZVY
Adrenal_c	SRR1158513	Adrenal	Tissues	101PE	28565131	PMID: 25349387, GEO: GSM1321278	Adr_CT22
Adrenal_c	SRR1158514	Adrenal	Tissues	101PE	51239383	PMID: 25349387, GEO: GSM1321279	Adr_CT28
Adrenal_c	SRR1158515	Adrenal	Tissues	101PE	66395119	PMID: 25349387, GEO: GSM1321280	Adr_CT34
Adrenal_c	SRR1158516	Adrenal	Tissues	101PE	20215680	PMID: 25349387, GEO: GSM1321281	Adr_CT40
Adrenal_c	SRR1158517	Adrenal	Tissues	101PE	24550445	PMID: 25349387, GEO: GSM1321282	Adr_CT46
Adrenal_c	SRR1158518	Adrenal	Tissues	101PE	26657404	PMID: 25349387, GEO: GSM1321283	Adr_CT52
Adrenal_c	SRR1158519	Adrenal	Tissues	101PE	25762470	PMID: 25349387, GEO: GSM1321284	Adr_CT58
Adrenal_c	SRR1158520	Adrenal	Tissues	101PE	25028553	PMID: 25349387, GEO: GSM1321285	Adr_CT64
Bladder_a	SRR567482	Bladder	Tissues	101PE	161644204	ENCODE project, GEO: GSM1000564	CSHL_RnaSeq_Bladder_adult-8wks
Bladder_b	SRR5048036	Bladder	Tissues	101PE	161479423	PRJNA66167, GEO: GSM2400111	ENCODE biosample ENCBS247ENC
Bladder_c	SRR3192509	Bladder	Tissues	100SE	30781622	GEO: GSM2071566	ENCODE biosample ENCBS809DPZ
Bladder_c	SRR3192510	Bladder	Tissues	100SE	30735813	GEO: GSM2071566	ENCODE biosample ENCBS809DPZ
Bladder_c	SRR3192507	Bladder	Tissues	100SE	22861358	GEO: GSM2071565	ENCODE biosample ENCBS437LDX
Bladder_c	SRR3192508	Bladder	Tissues	100SE	22768447	GEO: GSM2071565	ENCODE biosample ENCBS437LDX
FatPad_a	SRR453130	FatPad	Tissues	76PE	40067281	ENCODE project, GEO: GSM900191	CSHL_RnaSeq_SubcFatPad_adult-8wks
FatPad_a	SRR453131	FatPad	Tissues	76PE	38254999	ENCODE project, GEO: GSM900191	CSHL_RnaSeq_SubcFatPad_adult-8wks
FatPad_a	SRR453132	FatPad	Tissues	76PE	38677923	ENCODE project, GEO: GSM900191	CSHL_RnaSeq_SubcFatPad_adult-8wks
FatPad_a	SRR453133	FatPad	Tissues	76PE	40166941	ENCODE project, GEO: GSM900191	CSHL_RnaSeq_SubcFatPad_adult-8wks
FatPad_a	SRR453126	FatPad	Tissues	76PE	38631103	ENCODE project, GEO: GSM900190	CSHL_RnaSeq_GenitalFatPad_adult-8wks
FatPad_a	SRR453127	FatPad	Tissues	76PE	30743993	ENCODE project, GEO: GSM900190	CSHL_RnaSeq_GenitalFatPad_adult-8wks
FatPad_a	SRR453128	FatPad	Tissues	76PE	39388225	ENCODE project, GEO: GSM900190	CSHL_RnaSeq_GenitalFatPad_adult-8wks
FatPad_a	SRR453129	FatPad	Tissues	76PE	39203401	ENCODE project, GEO: GSM900190	CSHL_RnaSeq_GenitalFatPad_adult-8wks
Brown_Adipose	SRR1158537	Adipose_brown	Tissues	101PE	23908895	PMID: 25349387, GEO: GSM1321302	BFat_CT22, anterior dorsum adipose, strain C57/BL6
Brown_Adipose	SRR1158538	Adipose_brown	Tissues	101PE	41648806	PMID: 25349387, GEO: GSM1321303	BFat_CT28, anterior dorsum adipose, strain C57/BL6
Brown_Adipose	SRR1158539	Adipose_brown	Tissues	101PE	27725310	PMID: 25349387, GEO: GSM1321304	BFat_CT34, anterior dorsum adipose, strain C57/BL6
Brown_Adipose	SRR1158540	Adipose_brown	Tissues	101PE	25325889	PMID: 25349387, GEO: GSM1321305	BFat_CT40, anterior dorsum adipose, strain C57/BL6
Brown_Adipose	SRR1158541	Adipose_brown	Tissues	101PE	31543401	PMID: 25349387, GEO: GSM1321306	BFat_CT46, anterior dorsum adipose, strain C57/BL6
Brown_Adipose	SRR1158542	Adipose_brown	Tissues	101PE	36330443	PMID: 25349387, GEO: GSM1321307	BFat_CT52, anterior dorsum adipose, strain C57/BL6
Brown_Adipose	SRR1158543	Adipose_brown	Tissues	101PE	30971302	PMID: 25349387, GEO: GSM1321308	BFat_CT58, anterior dorsum adipose, strain C57/BL6
Brown_Adipose	SRR1158544	Adipose_brown	Tissues	101PE	36706934	PMID: 25349387, GEO: GSM1321309	BFat_CT64, anterior dorsum adipose, strain C57/BL6
White_Adipose	SRR1158601	Adipose_white	Tissues	101PE	23124011	PMID: 25349387, GEO: GSM1321366	WFat_CT22, epididymal, strain C57/BL6
White_Adipose	SRR1158602	Adipose_white	Tissues	101PE	23089806	PMID: 25349387, GEO: GSM1321367	WFat_CT28, epididymal, strain C57/BL6
White_Adipose	SRR1158603	Adipose_white	Tissues	101PE	30739323	PMID: 25349387, GEO: GSM1321368	WFat_CT34, epididymal, strain C57/BL6
White_Adipose	SRR1158604	Adipose_white	Tissues	101PE	25228594	PMID: 25349387, GEO: GSM1321369	WFat_CT40, epididymal, strain C57/BL6
White_Adipose	SRR1158605	Adipose_white	Tissues	101PE	22522468	PMID: 25349387, GEO: GSM1321370	WFat_CT46, epididymal, strain C57/BL6
White_Adipose	SRR1158606	Adipose_white	Tissues	101PE	12174041	PMID: 25349387, GEO: GSM1321371	WFat_CT52, epididymal, strain C57/BL6
White_Adipose	SRR1158607	Adipose_white	Tissues	101PE	29287942	PMID: 25349387, GEO: GSM1321372	WFat_CT58, epididymal, strain C57/BL6
White_Adipose	SRR1158608	Adipose_white	Tissues	101PE	25841887	PMID: 25349387, GEO: GSM1321373	WFat_CT64, epididymal, strain C57/BL6
FatPad_b	SRR5048013	FatPad	Tissues	76PE	40067281	GEO: GSM2400089	ENCODE biosample ENCBS304ENC, subcutaneous adipose tissue, pooled male and female, 8 week, donor ENCDO072AAA
FatPad_b	SRR5048014	FatPad	Tissues	76PE	38254999	GEO: GSM2400089	ENCODE biosample ENCBS304ENC, subcutaneous adipose tissue, pooled male and female, 8 week, donor ENCDO072AAA
FatPad_b	SRR5048011	FatPad	Tissues	76PE	38677923	GEO: GSM2400088	ENCODE biosample ENCBS305ENC, subcutaneous adipose tissue, pooled male and female, 8 week, donor ENCDO072AAA
FatPad_b	SRR5048012	FatPad	Tissues	76PE	40166941	GEO: GSM2400088	ENCODE biosample ENCBS305ENC, subcutaneous adipose tissue, pooled male and female, 8 week, donor ENCDO072AAA
MammGland_a	SRR453087	Mammary_Gland	Tissues	76PE	17863092	ENCODE project, GEO: GSM900184	CSHL_RnaSeq_MammaryGland_adult-8wks
MammGland_a	SRR453088	Mammary_Gland	Tissues	76PE	29457531	ENCODE project, GEO: GSM900184	CSHL_RnaSeq_MammaryGland_adult-8wks
MammGland_a	SRR453089	Mammary_Gland	Tissues	76PE	38365471	ENCODE project, GEO: GSM900184	CSHL_RnaSeq_MammaryGland_adult-8wks
MammGland_a	SRR453090	Mammary_Gland	Tissues	76PE	17706560	ENCODE project, GEO: GSM900184	CSHL_RnaSeq_MammaryGland_adult-8wks
MammGland_a	SRR453091	Mammary_Gland	Tissues	76PE	15091909	ENCODE project, GEO: GSM900184	CSHL_RnaSeq_MammaryGland_adult-8wks
MammGland_a	SRR453092	Mammary_Gland	Tissues	76PE	28518055	ENCODE project, GEO: GSM900184	CSHL_RnaSeq_MammaryGland_adult-8wks
MammGland_b	SRR1999764	Mammary_Gland	Tissues	101SE	21143325	GEO: GSM1668275	WT1, mammary gland, strain C57B6/J
MammGland_b	SRR1999765	Mammary_Gland	Tissues	101SE	40107749	GEO: GSM1668276	WT2, mammary gland, strain C57B6/J
MammGland_b	SRR1999766	Mammary_Gland	Tissues	101SE	37924110	GEO: GSM1668277	WT3, mammary gland, strain C57B6/J
MammGland_b	SRR1999767	Mammary_Gland	Tissues	101SE	37400685	GEO: GSM1668278	WT4, mammary gland, strain C57B6/J
MammGland_b	SRR496989	Mammary_Gland	Tissues	75SE	35095117	PMID: 25070796, GEO: GSM930902	wild type, mammary gland, 6 weeks, strain C57BL/6
MammGland_b	SRR496988	Mammary_Gland	Tissues	75SE	35655082	PMID: 25070796, GEO: GSM930902	wild type, mammary gland, 6 weeks, strain C57BL/6
MammGland_c	SRR5047984	Mammary_Gland	Tissues	76PE	38365471	GEO: GSM2400081	ENCODE biosample ENCBS293ENC, mammary gland, 8 week, pooled male and female, strain C57BL/6J, donor ENCDO072AAA
MammGland_c	SRR5047983	Mammary_Gland	Tissues	76PE	29457531	GEO: GSM2400081	ENCODE biosample ENCBS293ENC, mammary gland, 8 week, pooled male and female, strain C57BL/6J, donor ENCDO072AAA
MammGland_c	SRR5047982	Mammary_Gland	Tissues	76PE	17863092	GEO: GSM2400081	ENCODE biosample ENCBS293ENC, mammary gland, 8 week, pooled male and female, strain C57BL/6J, donor ENCDO072AAA
MammGland_c	SRR5047979	Mammary_Gland	Tissues	76PE	17706560	GEO: GSM2400080	ENCODE biosample ENCBS294ENC, mammary gland, 8 week, pooled male and female, strain C57BL/6J, donor ENCDO072AAA
MammGland_c	SRR5047980	Mammary_Gland	Tissues	76PE	15091909	GEO: GSM2400080	ENCODE biosample ENCBS294ENC, mammary gland, 8 week, pooled male and female, strain C57BL/6J, donor ENCDO072AAA
MammGland_c	SRR5047981	Mammary_Gland	Tissues	76PE	28518055	GEO: GSM2400080	ENCODE biosample ENCBS294ENC, mammary gland, 8 week, pooled male and female, strain C57BL/6J, donor ENCDO072AAA
Lung_a	SRR453156	Lung	Tissues	76PE	35609119	ENCODE project, GEO: GSM900196	CSHL_RnaSeq_Lung_adult-8wks
Lung_a	SRR453157	Lung	Tissues	76PE	34958253	ENCODE project, GEO: GSM900196	CSHL_RnaSeq_Lung_adult-8wks
Lung_a	SRR453158	Lung	Tissues	76PE	31324910	ENCODE project, GEO: GSM900196	CSHL_RnaSeq_Lung_adult-8wks
Lung_a	SRR453159	Lung	Tissues	76PE	31173877	ENCODE project, GEO: GSM900196	CSHL_RnaSeq_Lung_adult-8wks
Lung_a	SRR594406	Lung	Tissues	80PE	62362901	PMID: 23258891 GEO: GSM1020653	mouse_b_lung
Lung_c	SRR1158585	Lung	Tissues	101PE	13308372	PMID: 25349387, GEO: GSM1321350	Lun_CT22, strain C57/BL6
Lung_c	SRR1158586	Lung	Tissues	101PE	17710880	PMID: 25349387, GEO: GSM1321351	Lun_CT28, strain C57/BL6
Lung_c	SRR1158587	Lung	Tissues	101PE	29860866	PMID: 25349387, GEO: GSM1321352	Lun_CT34, strain C57/BL6
Lung_c	SRR1158588	Lung	Tissues	101PE	57008222	PMID: 25349387, GEO: GSM1321353	Lun_CT40, strain C57/BL6
Lung_c	SRR1158589	Lung	Tissues	101PE	29457635	PMID: 25349387, GEO: GSM1321354	Lun_CT46, strain C57/BL6
Lung_c	SRR1158590	Lung	Tissues	101PE	38741541	PMID: 25349387, GEO: GSM1321355	Lun_CT52, strain C57/BL6
Lung_c	SRR1158591	Lung	Tissues	101PE	81179804	PMID: 25349387, GEO: GSM1321356	Lun_CT58, strain C57/BL6
Lung_c	SRR1158592	Lung	Tissues	101PE	19927660	PMID: 25349387, GEO: GSM1321357	Lun_CT64, strain C57/BL6
Lung_d	SRR2927739	Lung	Tissues	100PE	82301382	GEO: GSM1931646	Lung, male, 8 weeks, strain C57BL/6, WT
Lung_d	SRR2071507	Lung	Tissues	51PE	47956339	GEO: GSM1716273	Normal lung, WT_lung_2
Lung_d	SRR2071506	Lung	Tissues	51PE	51323867	GEO: GSM1716272	Normal lung, WT_lung_1
Ovary_a	SRR453077	Ovary	Ovary	76PE	16193075	ENCODE project, GEO: GSM900183	CSHL_RnaSeq_Ovary_adult-8wks
Ovary_a	SRR453078	Ovary	Ovary	76PE	11964530	ENCODE project, GEO: GSM900183	CSHL_RnaSeq_Ovary_adult-8wks
Ovary_a	SRR453079	Ovary	Ovary	76PE	5093422	ENCODE project, GEO: GSM900183	CSHL_RnaSeq_Ovary_adult-8wks
Ovary_a	SRR453080	Ovary	Ovary	76PE	11144283	ENCODE project, GEO: GSM900183	CSHL_RnaSeq_Ovary_adult-8wks
Ovary_a	SRR453081	Ovary	Ovary	76PE	11103625	ENCODE project, GEO: GSM900183	CSHL_RnaSeq_Ovary_adult-8wks
Ovary_a	SRR453082	Ovary	Ovary	76PE	10339874	ENCODE project, GEO: GSM900183	CSHL_RnaSeq_Ovary_adult-8wks
Ovary_a	SRR453083	Ovary	Ovary	76PE	10721464	ENCODE project, GEO: GSM900183	CSHL_RnaSeq_Ovary_adult-8wks
Ovary_a	SRR453084	Ovary	Ovary	76PE	7576027	ENCODE project, GEO: GSM900183	CSHL_RnaSeq_Ovary_adult-8wks
Ovary_a	SRR453085	Ovary	Ovary	76PE	7576027	ENCODE project, GEO: GSM900183	CSHL_RnaSeq_Ovary_adult-8wks
Ovary_a	SRR453086	Ovary	Ovary	76PE	10974570	ENCODE project, GEO: GSM900183	CSHL_RnaSeq_Ovary_adult-8wks
Ovary_b	SRR5171100	Ovary	Ovary	100/102 PE	31557381	GEO: GSM2453446	ENCODE biosample ENCBS887UIO, ovary, female, 10 week, donor ENCDO072AAA, strain C57BL/6J
Ovary_b	SRR1757634	Ovary	Ovary	50PE	30091295	PMID: 25683803, GEO: GSM1585051	ovary, 8-10 week, mixed strain, WT
Ovary_b	SRR1757633	Ovary	Ovary	50PE	54026901	PMID: 25683803, GEO: GSM1585050	ovary, 8-10 week, mixed strain, WT
Ovary_b	SRR943343	Ovary	Ovary	101SE	33909305	PMID: 24463510, GEO: GSM1196047	ovary, 16 weeks, strain C57BL/6
Ovary_b	SRR943342	Ovary	Ovary	101SE	38047026	PMID: 24463510, GEO: GSM1196046	ovary, 16 weeks, strain C57BL/6
Ovary_b	SRR649372	Ovary	Ovary	75SE	40498492	PMID: 24463510, GEO: GSM1064842	ovary, adult, strain C57BL/6
Spleen_a	SRR453160	Spleen	Immune_hematopoiesis	76PE	29914055	ENCODE project, GEO: GSM900197	CSHL_RnaSeq_Spleen_adult-8wks
Spleen_a	SRR453161	Spleen	Immune_hematopoiesis	76PE	22731814	ENCODE project, GEO: GSM900197	CSHL_RnaSeq_Spleen_adult-8wks
Spleen_a	SRR453162	Spleen	Immune_hematopoiesis	76PE	21459054	ENCODE project, GEO: GSM900197	CSHL_RnaSeq_Spleen_adult-8wks
Spleen_a	SRR453163	Spleen	Immune_hematopoiesis	76PE	29306735	ENCODE project, GEO: GSM900197	CSHL_RnaSeq_Spleen_adult-8wks
Spleen_a	SRR453164	Spleen	Immune_hematopoiesis	76PE	23661606	ENCODE project, GEO: GSM900197	CSHL_RnaSeq_Spleen_adult-8wks
Spleen_a	SRR453165	Spleen	Immune_hematopoiesis	76PE	25521032	ENCODE project, GEO: GSM900197	CSHL_RnaSeq_Spleen_adult-8wks
Spleen_a	SRR2927741	Spleen	Immune_hematopoiesis	100PE	59298082	PMID: 26768488, GEO: GSM1931648	Spleen, male, 8 weeks, strain C57BL/6, WT
Spleen_b	SRR594400	Spleen	Immune_hematopoiesis	50PE	114072257	PMID: 23258891 GEO: GSM1020647	mouse_a_spleen
Spleen_b	SRR594408	Spleen	Immune_hematopoiesis	80PE	114814142	PMID: 23258891 GEO: GSM1020655	mouse_b_spleen
Spleen_b	SRR594417	Spleen	Immune_hematopoiesis	50PE	113321013	PMID: 23258891 GEO: GSM1020664	mouse_c_spleen
Spleen_c	SRR2033448	Spleen	Immune_hematopoiesis	50SE	36989760	PRJNA280546	Spleen, 45 days, male, strain C57BL/6N, WT
Spleen_c	SRR2033449	Spleen	Immune_hematopoiesis	50SE	44573521	PRJNA280546	Spleen, 45 days, male, strain C57BL/6N, WT
Spleen_c	SRR2033450	Spleen	Immune_hematopoiesis	50SE	51347362	PRJNA280546	Spleen, 45 days, male, strain C57BL/6N, WT
Spleen_c	SRR2033451	Spleen	Immune_hematopoiesis	50SE	38747210	PRJNA280546	Spleen, 45 days, male, strain C57BL/6N, WT
Spleen_c	SRR2033452	Spleen	Immune_hematopoiesis	50SE	32125910	PRJNA280546	Spleen, 45 days, male, strain C57BL/6N, WT
Thymus_a	SRR453134	Thymus	Immune_hematopoiesis	76PE	13474342	ENCODE project, GEO: GSM900192	CSHL_RnaSeq_Thymus_adult-8wks
Thymus_a	SRR453135	Thymus	Immune_hematopoiesis	76PE	33085301	ENCODE project, GEO: GSM900192	CSHL_RnaSeq_Thymus_adult-8wks
Thymus_a	SRR453136	Thymus	Immune_hematopoiesis	76PE	33472366	ENCODE project, GEO: GSM900192	CSHL_RnaSeq_Thymus_adult-8wks
Thymus_a	SRR453137	Thymus	Immune_hematopoiesis	76PE	37355918	ENCODE project, GEO: GSM900192	CSHL_RnaSeq_Thymus_adult-8wks
Thymus_a	SRR453138	Thymus	Immune_hematopoiesis	76PE	31197022	ENCODE project, GEO: GSM900192	CSHL_RnaSeq_Thymus_adult-8wks
Thymus_a	SRR453139	Thymus	Immune_hematopoiesis	76PE	32992022	ENCODE project, GEO: GSM900192	CSHL_RnaSeq_Thymus_adult-8wks
Thymus_b	SRR2927743	Thymus	Immune_hematopoiesis	100PE	98640369	PMID: 26768488, GEO: GSM1931650	Thymus, male, 8 weeks, strain C57BL/6, WT
Thymus_b	SRR2033453	Thymus	Immune_hematopoiesis	50SE	37800486	PRJNA280546	Thymus, 45 days, male, strain C57BL/6N, WT
Thymus_b	ERR032216	Thymus	Immune_hematopoiesis	76PE	34181929	PRJEB2476	Thymus, adult, strain DBAxC57BL/6J, WT
Thymus_b	ERR032215	Thymus	Immune_hematopoiesis	76PE	33088629	PRJEB2476	Thymus, adult, strain DBAxC57BL/6J, WT
Thymus_b	ERR032217	Thymus	Immune_hematopoiesis	76PE	34440865	PRJEB2476	Thymus, adult, strain DBAxC57BL/6J, WT
Thymus_b	ERR032219	Thymus	Immune_hematopoiesis	76PE	34916651	PRJEB2476	Thymus, adult, strain DBAxC57BL/6J, WT
Thymus_b	ERR032218	Thymus	Immune_hematopoiesis	76PE	35640217	PRJEB2476	Thymus, adult, strain DBAxC57BL/6J, WT
Thymus_b	ERR032220	Thymus	Immune_hematopoiesis	76PE	35768263	PRJEB2476	Thymus, adult, strain DBAxC57BL/6J, WT
Thymus_c	SRR345622	Thymus	Immune_hematopoiesis	50SE	127029439	PMID: 24013668, GEO: GSM797706	Whole thymus, 4 week, strain c57BL/6, WT
Thymus_c	SRR345621	Thymus	Immune_hematopoiesis	50SE	131780274	PMID: 24013668, GEO: GSM797705	Whole thymus, 4 week, strain c57BL/6, WT
Thymus_c	SRR345618	Thymus	Immune_hematopoiesis	76SE	95623596	PMID: 24013668, GEO: GSM797702	Whole thymus, 4 week, strain c57BL/6, WT
CL_CH12	SRR530637	CL_CH12	CLines	101PE	121512705	ENCODE project, GEO: GSM973234	Stanford_RnaSeq_CH12 (superseded by GSE78620)
CL_CH12	SRR530638	CL_CH12	CLines	101PE	157758878	ENCODE project, GEO: GSM973234	Stanford_RnaSeq_CH12 (superseded by GSE78620)
CL_MEL	SRR530633	CL_MEL	CLines	101PE	109637592	ENCODE project, GEO: GSM973232	Stanford_RnaSeq_MEL
CL_MEL	SRR530634	CL_MEL	CLines	101PE	140621688	ENCODE project, GEO: GSM973232	Stanford_RnaSeq_MEL
CL_3T3_a	SRR4269901	CL_3T3	CLines	76PE	66443043	PMID:27777310, GEO: GSM2322558	3T3-L1 cells, strain C57BL/6J, immortalized white preadipocytes
CL_3T3_a	SRR4019014	CL_3T3	CLines	75SE	42865817	PMID: 27869828, GEO: GSM2267346	3T3 cells
CL_3T3_a	SRR4019015	CL_3T3	CLines	75SE	43086333	PMID: 27869828, GEO: GSM2267347	3T3 cells
CL_3T3_a	SRR2313129	CL_3T3	CLines	90SE	37064978	PMID: 26565915, GEO:GSM1872117	stroma, NIH-3T3
CL_3T3_b	SRR1745233	CL_3T3	CLines	52SE	32727241	PMID: 25596527, GEO: GSM1579331	3T3-L1 cells
CL_3T3_b	SRR1745234	CL_3T3	CLines	52SE	37483109	PMID: 25596527, GEO: GSM1579332	3T3-L1 cells
CL_3T3_b	SRR1745235	CL_3T3	CLines	52SE	32664072	PMID: 25596527, GEO: GSM1579333	3T3-L1 cells
CL_3T3_b	SRR1745236	CL_3T3	CLines	52SE	36011239	PMID: 25596527, GEO: GSM1579334	3T3-L1 cells
CL_3T3_b	SRR1745237	CL_3T3	CLines	52SE	38251741	PMID: 25596527, GEO: GSM1579335	3T3-L1 cells
CL_3T3_b	SRR1745238	CL_3T3	CLines	52SE	36980639	PMID: 25596527, GEO: GSM1579336	3T3-L1 cells
MEF_a	SRR611704	MEF	Cells	101PE	55325338	PMID: 23217423, GEO: GSM1032545	feeder1
MEF_a	SRR611705	MEF	Cells	101PE	25605470	PMID: 23217423, GEO: GSM1032546	feeder2
MEF_a	SRR611706	MEF	Cells	101PE	38766234	PMID: 23217423, GEO: GSM1032547	feeder3
MEF_b	SRR5224363	MEF	Cells	101SE	49060075	PMID: 28297718	MEFs from testis, pooled male and female, strain ICR
MEF_b	SRR4453737	MEF	Cells	51SE	10389355	PMID: 27930301, GEO: GSM2361190	MEF, strain C57BL/6
MEF_b	SRR4453736	MEF	Cells	51SE	22434589	PMID: 27930301, GEO: GSM2361189	MEF, strain C57BL/6
MEF_b	SRR4453735	MEF	Cells	51SE	18216066	PMID: 27930301, GEO: GSM2361188	MEF, strain C57BL/6
MEF_b	SRR4453734	MEF	Cells	51SE	17323469	PMID: 27930301, GEO: GSM2361187	MEF, strain C57BL/6
MEF_b	SRR3930593	MEF	Cells	151PE	63487843	GEO: GSM2241947	MEF, passage 10-15, proliferating, untreated, strain C57BL/6, WT
MEF_b	SRR3930592	MEF	Cells	151PE	26492455	GEO: GSM2241946	MEF, passage 10-15, proliferating, untreated, strain C57BL/6, WT
MEF_b	SRR3930591	MEF	Cells	151PE	32066564	GEO: GSM2241945	MEF, passage 10-15, proliferating, untreated, strain C57BL/6, WT
MEF_c	SRR3218722	MEF	Cells	80PE	36504470	PMID: 27557707, GEO: GSM2085309	Mouse Embryonic Fibroblasts (MEF), WT
MEF_c	SRR3218721	MEF	Cells	80PE	34297983	PMID: 27557707, GEO: GSM2085308	Mouse Embryonic Fibroblasts (MEF), WT
MEF_c	SRR3218720	MEF	Cells	80PE	32307963	PMID: 27557707, GEO: GSM2085307	Mouse Embryonic Fibroblasts (MEF), WT
MEF_c	SRR3180534	MEF	Cells	51SE	52913363	PMID: 27117588, GEO: GSM2067697	Mouse Embryonic Fibroblasts (MEF), WT, strain 129mix
MEF_c	SRR2133604	MEF	Cells	50PE	24227398	GEO: GSM1835979	MEF_WT, strain B6/129
MEF_c	SRR2133602	MEF	Cells	50PE	20122490	GEO: GSM1835977	MEF_WT, strain B6/129
CL_N2A_b	SRR1269752	CL_N2A	CLines	101PE	119977755	PMID: 25219497, GEO: GSM1378370	N2A_siCtrl_KD_b
CL_N2A_b	SRR1269750	CL_N2A	CLines	101PE	102905714	PMID: 25219497, GEO: GSM1378368	N2A_siCtrl_KD_a
CL_N2A_c	SRR3370923	CL_N2A	CLines	125PE	74883371	PMID: 28157508, GEO: GSM2120790	CL_N2A_Srrm4_Cont_c
CL_N2A_c	SRR3370924	CL_N2A	CLines	125PE	78947534	PMID: 28157508, GEO: GSM2120791	CL_N2A_Srrm4_Cont_d
Brain_Endothelium	SRR1033795	Brain_Endothelium	Tissues	101PE	36538349	PMID: 25186741 GEO: GSM1269915	Endothelial1
Brain_Endothelium	SRR1033796	Brain_Endothelium	Tissues	101PE	33791793	PMID: 25186741 GEO: GSM1269916	Endothelial2
Thalamus	ERR1709736	Thalamus	Neural	100SE	28653501	PRJEB16747	Thalamus-m2_s, ERS1422724, 3 months, male
Thalamus	ERR1709735	Thalamus	Neural	100SE	30697213	PRJEB16747	Thalamus-m1_s, ERS1422723, 3 months, male
Thalamus	ERR1709734	Thalamus	Neural	100SE	68784318	PRJEB16747	Thalamus-f2_s, ERS1422722, 3 months, female
Thalamus	ERR1709733	Thalamus	Neural	100SE	60147048	PRJEB16747	Thalamus-f1_s, ERS1422721, 3 months, female
Hypothalamus	ERR1709728	Hypothalamus	Neural	100SE	31435728	PRJEB16747	Hypothalamus-m2_s, ERS1422716, 3 months, male
Hypothalamus	ERR1709727	Hypothalamus	Neural	100SE	49802203	PRJEB16747	Hypothalamus-m1_s, ERS1422715, 3 months, male
Hypothalamus	ERR1709726	Hypothalamus	Neural	100SE	68923813	PRJEB16747	Hypothalamus-f2_s, ERS1422714, 3 months, female
Hypothalamus	ERR1709725	Hypothalamus	Neural	100SE	33430096	PRJEB16747	Hypothalamus-f1_s, ERS1422713, 3 months, female
Hippocampus	ERR1709724	Hippocampus	Neural	100SE	33564822	PRJEB16747	Hippocampus-m2_s, ERS1422712, 3 months, male
Hippocampus	ERR1709723	Hippocampus	Neural	100SE	27998649	PRJEB16747	Hippocampus-m1_s, ERS1422711, 3 months, male
Hippocampus	ERR1709722	Hippocampus	Neural	100SE	92677186	PRJEB16747	Hippocampus-f2_s, ERS1422710, 3 months, female
Hippocampus	ERR1709721	Hippocampus	Neural	100SE	40742302	PRJEB16747	Hippocampus-f1_s, ERS1422709, 3 months, female
Skin_a	ERR1589240	Skin	Epithelial	101SE	27619792	PRJEB15150	Skin from Mouse tails, ERS1294925
Skin_a	ERR1589239	Skin	Epithelial	101SE	35905289	PRJEB15150	Skin from Mouse tails, ERS1294924
Skin_a	ERR1589238	Skin	Epithelial	101SE	23082014	PRJEB15150	Skin from Mouse tails, ERS1294923
Skin_a	ERR1589237	Skin	Epithelial	101SE	24581301	PRJEB15150	Skin from Mouse tails, ERS1294922
Skin_a	ERR1589236	Skin	Epithelial	101SE	26717260	PRJEB15150	Skin from Mouse tails, ERS1294921
Skin_a	SRR2927740	Skin	Epithelial	100PE	55801575	GEO: GSM1931647	skin, male, 8 week, strain C57BL/6
Skin_b	SRR4106149	Skin	Epithelial	52SE	29286071	PMID: 28279190, GEO: GSM2299981	Skin, female, strain C57BL/6J
Skin_b	SRR4106148	Skin	Epithelial	52SE	29169238	PMID: 28279190, GEO: GSM2299980	Skin, female, strain C57BL/6J
Skin_b	SRR4106145	Skin	Epithelial	52SE	50345578	PMID: 28279190, GEO: GSM2299977	Skin, male strain C57BL/6J
Skin_b	SRR4106144	Skin	Epithelial	52SE	31309984	PMID: 28279190, GEO: GSM2299976	Skin, male strain C57BL/6J
Skin_b	SRR1382277	Skin	Epithelial	51SE	16564439	PMID: 25202826, GEO: GSM1410794	Adult skin, 10 week, strain FVB
Skin_b	SRR1382278	Skin	Epithelial	51SE	15170847	PMID: 25202826, GEO: GSM1410794	Adult skin, 10 week, strain FVB
Skin_c	SRR1795407	Skin	Epithelial	51PE	42395049	PMID: 26900923, GEO: GSM1606098	Skin, male, 6 month, strain C57BL/6
Skin_c	SRR1795406	Skin	Epithelial	51PE	42872625	PMID: 26900923, GEO: GSM1606097	Skin, male, 6 month, strain C57BL/6
Skin_c	SRR1795405	Skin	Epithelial	51PE	48902876	PMID: 26900923, GEO: GSM1606096	Skin, male, 6 month, strain C57BL/6
Skin_c	SRR1795404	Skin	Epithelial	51PE	56453779	PMID: 26900923, GEO: GSM1606095	Skin, female, 6 month, strain C57BL/6
Skin_c	SRR1795403	Skin	Epithelial	51PE	42360436	PMID: 26900923, GEO: GSM1606094	Skin, female, 6 month, strain C57BL/6
Skin_c	SRR1795402	Skin	Epithelial	51PE	47252524	PMID: 26900923, GEO: GSM1606093	Skin, female, 6 month, strain C57BL/6
Keratinocytes	SRR5058263	Keratinocytes	Epithelial	50SE	26259602	GEO: GSM2407071	FACS sorted ex vivo keratinocytes from adult skin epidermis
Keratinocytes	SRR5058262	Keratinocytes	Epithelial	50SE	28454978	GEO: GSM2407070	FACS sorted ex vivo keratinocytes from adult skin epidermis
Keratinocytes	SRR492416	Keratinocytes	Epithelial	50SE	14023516	PMID: 23325109, GEO: GSM923595	primary keratinocytes isolated from back skin, neonatal, passage <10
Keratinocytes	SRR492415	Keratinocytes	Epithelial	50SE	16744944	PMID: 23325109, GEO: GSM923595	primary keratinocytes isolated from back skin, neonatal, passage <10
Lymph_node_a	SRR3493320	Lymph_node	Immune_hematopoiesis	99PE	45357952	PRJNA321027	Male, 12 weeks, treated with PBS, strain Balb/c
Lymph_node_a	SRR3493319	Lymph_node	Immune_hematopoiesis	99PE	39237847	PRJNA321027	Male, 12 weeks, treated with PBS, strain Balb/c
Lymph_node_a	SRR2016508	Lymph_node	Immune_hematopoiesis	65SE	26860600	GEO: GSM1680970	strain C57BL/6Ntac, unboosted
Lymph_node_a	SRR3929556	Lymph_node	Immune_hematopoiesis	75PE	3087441	PMID: 27595405, GEO: GSM2241607	Lymph Nodes TurboRFP (control, biological replicate 3), strain C57BL/6
Lymph_node_a	SRR3929557	Lymph_node	Immune_hematopoiesis	75PE	3021817	PMID: 27595405, GEO: GSM2241607	Lymph Nodes TurboRFP (control, biological replicate 3), strain C57BL/6
Lymph_node_a	SRR3929558	Lymph_node	Immune_hematopoiesis	75PE	3089640	PMID: 27595405, GEO: GSM2241607	Lymph Nodes TurboRFP (control, biological replicate 3), strain C57BL/6
Lymph_node_a	SRR3929559	Lymph_node	Immune_hematopoiesis	75PE	3092416	PMID: 27595405, GEO: GSM2241607	Lymph Nodes TurboRFP (control, biological replicate 3), strain C57BL/6
Lymph_node_a	SRR3929552	Lymph_node	Immune_hematopoiesis	75PE	5499353	PMID: 27595405, GEO: GSM2241606	Lymph Nodes TurboRFP (control, biological replicate 2), strain C57BL/6
Lymph_node_a	SRR3929553	Lymph_node	Immune_hematopoiesis	75PE	5372438	PMID: 27595405, GEO: GSM2241606	Lymph Nodes TurboRFP (control, biological replicate 2), strain C57BL/6
Lymph_node_a	SRR3929554	Lymph_node	Immune_hematopoiesis	75PE	5504636	PMID: 27595405, GEO: GSM2241606	Lymph Nodes TurboRFP (control, biological replicate 2), strain C57BL/6
Lymph_node_a	SRR3929555	Lymph_node	Immune_hematopoiesis	75PE	5501489	PMID: 27595405, GEO: GSM2241606	Lymph Nodes TurboRFP (control, biological replicate 2), strain C57BL/6
Lymph_node_a	SRR3929548	Lymph_node	Immune_hematopoiesis	75PE	5873318	PMID: 27595405, GEO: GSM2241605	Lymph Nodes TurboRFP (control, biological replicate 1), strain C57BL/6
Lymph_node_a	SRR3929549	Lymph_node	Immune_hematopoiesis	75PE	5748437	PMID: 27595405, GEO: GSM2241605	Lymph Nodes TurboRFP (control, biological replicate 1), strain C57BL/6
Lymph_node_a	SRR3929550	Lymph_node	Immune_hematopoiesis	75PE	5884595	PMID: 27595405, GEO: GSM2241605	Lymph Nodes TurboRFP (control, biological replicate 1), strain C57BL/6
Lymph_node_a	SRR3929551	Lymph_node	Immune_hematopoiesis	75PE	5892064	PMID: 27595405, GEO: GSM2241605	Lymph Nodes TurboRFP (control, biological replicate 1), strain C57BL/6
Lymph_node_b	SRR3080199	Lymph_node	Immune_hematopoiesis	50SE	37465405	PRJNA307494	Mesenteric lymph nodes, 7 weeks, female, strain C57BL/6, treated with PBS
Lymph_node_b	SRR3080158	Lymph_node	Immune_hematopoiesis	50SE	46206235	PRJNA307494	Mesenteric lymph nodes, 7 weeks, female, strain C57BL/6, treated with PBS
Prostate_a	SRR5077539	Prostate	Tissues	100PE	41935261	PMID: 28059767, GEO: GSM2417043	Prostate, WT, mixed background
Prostate_a	SRR5077540	Prostate	Tissues	100PE	56396609	PMID: 28059767, GEO: GSM2417044	Prostate, WT, mixed background
Prostate_a	SRR5077538	Prostate	Tissues	100PE	58549355	PMID: 28059767, GEO: GSM2417042	Prostate, WT, mixed background
Prostate_a	SRR5077537	Prostate	Tissues	100PE	58120666	PMID: 28059767, GEO: GSM2417041	Prostate, WT, mixed background
Prostate_b	SRR4301255	Prostate	Tissues	100PE	4000000	PMID: 27694579, GEO: GSM2331482	Prostate, normal, control
Prostate_b	SRR4301256	Prostate	Tissues	100PE	4000000	PMID: 27694579, GEO: GSM2331482	Prostate, normal, control
Prostate_b	SRR4301257	Prostate	Tissues	100PE	4000000	PMID: 27694579, GEO: GSM2331482	Prostate, normal, control
Prostate_b	SRR4301258	Prostate	Tissues	100PE	1817527	PMID: 27694579, GEO: GSM2331482	Prostate, normal, control
Prostate_b	SRR4301259	Prostate	Tissues	100PE	4000000	PMID: 27694579, GEO: GSM2331482	Prostate, normal, control
Prostate_b	SRR4301260	Prostate	Tissues	100PE	4000000	PMID: 27694579, GEO: GSM2331482	Prostate, normal, control
Prostate_b	SRR4301261	Prostate	Tissues	100PE	4000000	PMID: 27694579, GEO: GSM2331482	Prostate, normal, control
Prostate_b	SRR4301262	Prostate	Tissues	100PE	4000000	PMID: 27694579, GEO: GSM2331482	Prostate, normal, control
Prostate_b	SRR4301263	Prostate	Tissues	100PE	2080925	PMID: 27694579, GEO: GSM2331482	Prostate, normal, control
Prostate_b	SRR4301264	Prostate	Tissues	100PE	4000000	PMID: 27694579, GEO: GSM2331482	Prostate, normal, control
Prostate_b	SRR4301265	Prostate	Tissues	100PE	4000000	PMID: 27694579, GEO: GSM2331482	Prostate, normal, control
Prostate_b	SRR4301266	Prostate	Tissues	100PE	4000000	PMID: 27694579, GEO: GSM2331482	Prostate, normal, control
Prostate_b	SRR4301267	Prostate	Tissues	100PE	4000000	PMID: 27694579, GEO: GSM2331483	Prostate, normal, control
Prostate_b	SRR4301268	Prostate	Tissues	100PE	4000000	PMID: 27694579, GEO: GSM2331483	Prostate, normal, control
Prostate_b	SRR4301269	Prostate	Tissues	100PE	4000000	PMID: 27694579, GEO: GSM2331483	Prostate, normal, control
Prostate_b	SRR4301270	Prostate	Tissues	100PE	1738619	PMID: 27694579, GEO: GSM2331483	Prostate, normal, control
Prostate_b	SRR4301271	Prostate	Tissues	100PE	4000000	PMID: 27694579, GEO: GSM2331483	Prostate, normal, control
Prostate_b	SRR4301272	Prostate	Tissues	100PE	4000000	PMID: 27694579, GEO: GSM2331483	Prostate, normal, control
Prostate_b	SRR4301273	Prostate	Tissues	100PE	4000000	PMID: 27694579, GEO: GSM2331483	Prostate, normal, control
Prostate_b	SRR4301274	Prostate	Tissues	100PE	1849625	PMID: 27694579, GEO: GSM2331483	Prostate, normal, control
Thyroid_a	SRR4419980	Thyroid	Tissues	101PE	40744930	PRJNA348163	Male, 50 weeks, strain C57BL/6
Thyroid_a	SRR4419979	Thyroid	Tissues	101PE	40338093	PRJNA348163	Male, 50 weeks, strain C57BL/6
Thyroid_a	ERR1146884	Thyroid	Tissues	101/99PE	11697527	PRJEB11897	Mus musculus domesticus, MCThyroid14, male
Thyroid_a	ERR1146869	Thyroid	Tissues	101/99PE	10759845	PRJEB11897	Mus musculus domesticus; MCThyroid15b, male
Thyroid_a	ERR1146854	Thyroid	Tissues	101/99PE	11718251	PRJEB11897	Mus musculus domesticus; MCThyroid16b, male
Thyroid_a	ERR1146839	Thyroid	Tissues	101/100PE	17107771	PRJEB11897	Mus musculus domesticus; MCThyroidF1B, male
Thyroid_a	ERR1146809	Thyroid	Tissues	101/100PE	10569794	PRJEB11897	Mus musculus domesticus; MCThyroid18b, male
Thyroid_a	ERR1146794	Thyroid	Tissues	101/100PE	10176319	PRJEB11897	Mus musculus domesticus; MCThyroidB2C, male
Thyroid_a	ERR1146779	Thyroid	Tissues	101/100PE	11280329	PRJEB11897	Mus musculus domesticus; MCThyroidC12, male
Thyroid_a	ERR1146764	Thyroid	Tissues	101/100PE	11986768	PRJEB11897	Mus musculus domesticus; MCThyroidE1b, male
Thyroid_b	ERR1146880	Thyroid	Tissues	101/99PE	15373628	PRJEB11897	Mus musculus domesticus; IRThyroidIR122, male
Thyroid_b	ERR1146879	Thyroid	Tissues	101/99PE	12188580	PRJEB11897	Mus musculus domesticus; IRThyroidIR121, male
Thyroid_b	ERR1146878	Thyroid	Tissues	101/99PE	10781754	PRJEB11897	Mus musculus domesticus; IRThyroid132, male
Thyroid_b	ERR1146877	Thyroid	Tissues	101/99PE	12806469	PRJEB11897	Mus musculus domesticus; IRThyroid131, male
Thyroid_b	ERR1146876	Thyroid	Tissues	101/99PE	11436512	PRJEB11897	Mus musculus domesticus; IRThyroid08F1_A, male
Thyroid_b	ERR1146875	Thyroid	Tissues	101/99PE	13141496	PRJEB11897	Mus musculus domesticus; IRThyroid07F1C1, male
Thyroid_b	ERR1146874	Thyroid	Tissues	101/99PE	14207070	PRJEB11897	Mus musculus domesticus; IRThyroid05F1C1, male
Thyroid_b	ERR1146873	Thyroid	Tissues	101/99PE	12341576	PRJEB11897	Mus musculus domesticus; IRThyroid02FC_1, male
Thyroid_b	ERR1146824	Thyroid	Tissues	101/100PE	14889809	PRJEB11897	Mus musculus domesticus; CBTHYTP51, male
Thyroid_b	ERR1146769	Thyroid	Tissues	101/99PE	11559929	PRJEB11897	Mus musculus domesticus; CBThyroidtp81, male
Thyroid_b	ERR1146768	Thyroid	Tissues	101/99PE	10910166	PRJEB11897	Mus musculus domesticus; CBThyroidtp710, male
Thyroid_b	ERR1146767	Thyroid	Tissues	101/100PE	9776862	PRJEB11897	Mus musculus domesticus; CBThyroidtp4a, male
Thyroid_b	ERR1146766	Thyroid	Tissues	101/100PE	12017575	PRJEB11897	Mus musculus domesticus; CBThyroidtp3a2, male
Thyroid_b	ERR1146765	Thyroid	Tissues	101/100PE	10951475	PRJEB11897	Mus musculus domesticus; CBThyroidtp172, male
Thyroid_b	ERR1146763	Thyroid	Tissues	101/100PE	10413640	PRJEB11897	Mus musculus domesticus; CBThyroidtp121, male
Thyroid_b	ERR1146762	Thyroid	Tissues	101/100PE	11348701	PRJEB11897	Mus musculus domesticus; CBThyroidtp1, male
Uterus	SRR3190018	Uterus	Tissues	100SE	26660066	PMID: 26880751, GEO: GSM2072839	uterus, 12 week, mixed 129Sv X C57BL/6, WT
Uterus	SRR3190019	Uterus	Tissues	100SE	26623133	PMID: 26880751, GEO: GSM2072841	uterus, 12 week, mixed 129Sv X C57BL/6, WT
Uterus	SRR3190020	Uterus	Tissues	100SE	23960616	PMID: 26880751, GEO: GSM2072843	uterus, 12 week, mixed 129Sv X C57BL/6, WT
Uterus	SRR617708	Uterus	Tissues	50SE	34343681	PMID: 23760953, GEO: GSM1038105	uterus, strain CD1/129, WT
Bone_marrow	SRR1171538	Bone_marrow	Immune_hematopoiesis	100PE	34759521	PRJNA237532	Mixed strain, 8 months normal bone
Bone_marrow	SRR1171537	Bone_marrow	Immune_hematopoiesis	100PE	27454970	PRJNA237532	Mixed strain, 8 months normal bone
Bone_marrow	SRR1171539	Bone_marrow	Immune_hematopoiesis	100PE	33560939	PRJNA237532	Mixed strain, 8 months normal bone
Spermatozoa	SRR652211	Spermatozoa	Spermatogenesis	76SE	33235662	PMID: 23791531, GEO: GSM1069643	Spermatozoa, male, C57BL/6, 11 weeks
Spermatozoa	SRR652212	Spermatozoa	Spermatogenesis	76SE	35304343	PMID: 23791531, GEO: GSM1069643	Spermatozoa, male, C57BL/6, 11 weeks
Spermatozoa	SRR652213	Spermatozoa	Spermatogenesis	76SE	41602144	PMID: 23791531, GEO: GSM1069643	Spermatozoa, male, C57BL/6, 11 weeks
Spermatids	SRR652208	Spermatids	Spermatogenesis	76SE	24295450	PMID: 23791531, GEO: GSM1069642	Spermatids, male, C57BL/6, 11 weeks
Spermatids	SRR652209	Spermatids	Spermatogenesis	76SE	38510922	PMID: 23791531, GEO: GSM1069642	Spermatids, male, C57BL/6, 11 weeks
Spermatids	SRR652210	Spermatids	Spermatogenesis	76SE	40215919	PMID: 23791531, GEO: GSM1069642	Spermatids, male, C57BL/6, 11 weeks
Spermatocytes	SRR652205	Spermatocytes	Spermatogenesis	76SE	31950112	PMID: 23791531, GEO: GSM1069641	Spermatocytes, male, C57BL/6, 11 weeks
Spermatocytes	SRR652206	Spermatocytes	Spermatogenesis	76SE	36632802	PMID: 23791531, GEO: GSM1069641	Spermatocytes, male, C57BL/6, 11 weeks
Spermatocytes	SRR652207	Spermatocytes	Spermatogenesis	76SE	44526936	PMID: 23791531, GEO: GSM1069641	Spermatocytes, male, C57BL/6, 11 weeks
Spermatogonia	SRR652202	Spermatogonia	Spermatogenesis	76SE	33308345	PMID: 23791531, GEO: GSM1069640	Spermatogonia, male, C57BL/6, 6 days
Spermatogonia	SRR652203	Spermatogonia	Spermatogenesis	76SE	35742186	PMID: 23791531, GEO: GSM1069640	Spermatogonia, male, C57BL/6, 6 days
Spermatogonia	SRR652204	Spermatogonia	Spermatogenesis	76SE	41435589	PMID: 23791531, GEO: GSM1069640	Spermatogonia, male, C57BL/6, 6 days
Sertoli_cells	SRR652199	Sertoli_cells	Spermatogenesis	76SE	41430887	PMID: 23791531, GEO: GSM1069639	Sertoli cells, male, C57BL/6, 3 weeks
Sertoli_cells	SRR652200	Sertoli_cells	Spermatogenesis	76SE	46563585	PMID: 23791531, GEO: GSM1069639	Sertoli cells, male, C57BL/6, 3 weeks
Sertoli_cells	SRR652201	Sertoli_cells	Spermatogenesis	76SE	46780390	PMID: 23791531, GEO: GSM1069639	Sertoli cells, male, C57BL/6, 3 weeks
Pancreas_NewBorn	SRR5004320	Pancreas	Tissues	150PE	39335011	PRJNA352787, GEO: GSM2367743	Pancreas_NewBorn
Pancreas_NewBorn	SRR5004321	Pancreas	Tissues	150PE	33017772	PRJNA352787, GEO: GSM2367744	Pancreas_NewBorn
Pancreas_NewBorn	SRR5004322	Pancreas	Tissues	150PE	34831218	PRJNA352787, GEO: GSM2367745	Pancreas_NewBorn
Pancreas_9weeks	SRR5004329	Pancreas	Tissues	150PE	40092992	PRJNA352787, GEO: GSM2367752	Pancreas_9weeks
Pancreas_9weeks	SRR5004330	Pancreas	Tissues	150PE	34620999	PRJNA352787, GEO: GSM2367753	Pancreas_9weeks
Pancreas_9weeks	SRR5004331	Pancreas	Tissues	150PE	33157666	PRJNA352787, GEO: GSM2367754	Pancreas_9weeks

## Sheet: Chicken samples
VastDB_sample	SRA_ID	VastDB_subgroup	VastDB_group	Length	Read_number	Source	Info
Embr_StageX_a	SRX2400079	StageX	EarlyDev	101PE	243348227	GSE90957	Eyal-Giladi stage X chick embryos
Embr_StageX_b	SRX2400081	StageX	EarlyDev	101PE	222514094	GSE90957	Eyal-Giladi stage X chick embryos
Embr_StageX_c	SRX2400083	StageX	EarlyDev	101PE	233295870	GSE90957	Eyal-Giladi stage X chick embryos
Embr_Blastoderm_Fem	SRR534005	Blastoderm	EarlyDev	100PE	81367564	PMID: 23531366	12 hr blastoderm sample of 12 pooled females
Embr_Blastoderm_Fem	SRR534006	Blastoderm	EarlyDev	100PE	87486691	PMID: 23531366	12 hr blastoderm sample of 12 pooled females
Embr_Blastoderm_Male	SRR536786	Blastoderm	EarlyDev	100PE	86889589	PMID: 23531366	12 hr blastoderm sample of 12 pooled males
Embr_Blastoderm_Male	SRR536787	Blastoderm	EarlyDev	100PE	92021098	PMID: 23531366	12 hr blastoderm sample of 12 pooled males
Embr_PrimStreak	DRR002108	Primitive_Streak	EarlyDev	100SE	20212361	PRJDB90	Gg_P_1_embryo_mRNAseq, Erie, Turtle genome; HH1-HH6
Embr_PrimStreak	DRR002109	Primitive_Streak	EarlyDev	100SE	20930573	PRJDB90	Gg_P_2_embryo_mRNAseq, Erie, Turtle genome; HH1-HH6
Embr_HH4	SRR1822378	HH4	EarlyDev	100PE	206800413	PRJNA246653	HH4_RNA data
Embr_HH6	DRR002110	HH6	EarlyDev	100SE	31895802	PMID: 23624526	Gg_HH6_1_embryo_mRNAseq
Embr_HH6	DRR002111	HH6	EarlyDev	100SE	20446787	PMID: 23624526	Gg_HH6_2_embryo_mRNAseq
Embr_HH11_a	DRR002112	HH11	MidDev	100SE	32138221	PMID: 23624526	Gg_HH11_1_embryo_mRNAseq
Embr_HH11_a	DRR002113	HH11	MidDev	100SE	19697787	PMID: 23624526	Gg_HH11_2_embryo_mRNAseq
Embr_HH11_b	SRR1822379	HH11	MidDev	100PE	198178016	PRJNA246653	HH11_RNA
Embr_HH14_a	DRR002114	HH14	MidDev	100SE	32735998	PMID: 23624526	Gg_HH14_1_embryo_mRNAseq
Embr_HH14_a	DRR002115	HH14	MidDev	100SE	31026654	PMID: 23624526	Gg_HH14_2_embryo_mRNAseq
Embr_HH14_b	SRR1822371	HH14	MidDev	100PE	57776360	PRJNA246653	HH14_RNA data
Embr_HH16	DRR002116	HH16	MidDev	100SE	32568360	PMID: 23624526	Gg_HH16_1_embryo_mRNAseq
Embr_HH16	DRR002117	HH16	MidDev	100SE	31468292	PMID: 23624526	Gg_HH16_2_embryo_mRNAseq
Embr_HH19	DRR002118	HH19	MidDev	100SE	31094963	PMID: 23624526	Gg_HH19_1_embryo_mRNAseq
Embr_HH19	DRR002119	HH19	MidDev	100SE	31295460	PMID: 23624526	Gg_HH19_2_embryo_mRNAseq
Embr_HH21_22	SRR1822373	HH21_22	MidDev	80PE	48874648	PRJNA246653	HH21_RNA data
Embr_HH25_26	SRR1822375	HH21_22	MidDev	80PE	52102247	PRJNA246653	HH25/26_RNA data
Embr_HH28	DRR002120	HH28	MidDev	100SE	22013944	PMID: 23624526	Gg_HH28_1_embryo_mRNAseq
Embr_HH28	DRR002121	HH28	MidDev	100SE	21506469	PMID: 23624526	Gg_HH28_2_embryo_mRNAseq
Embr_HH30_31	ERR664974	HH30_31	MidDev	101PE	74828268	PRJEB7662	723_1_CGATGT_L001_embryo
Embr_HH32	SRX893874	HH32	MidDev	80PE	73646767	PRJNA246653	HH32_RNA data
Embr_HH36	SRR1822377	HH32	MidDev	80PE	96863191	PRJNA246653	HH36_RNA data
Embr_HH38	DRR002122	HH38	MidDev	100SE	31726995	PMID: 23624526	Gg_HH38_1_embryo_mRNAseq
Embr_HH38	DRR002123	HH38	MidDev	100SE	31012093	PMID: 23624526	Gg_HH38_2_embryo_mRNAseq
Fetal_FemGonads	SRR536788	Fetal_Fem_Gonads	EmbrGonads	100PE	83414552	PMID: 23531366	Gonads Female Sample 1
Fetal_FemGonads	SRR536790	Fetal_Fem_Gonads	EmbrGonads	100PE	88048140	PMID: 23531366	Gonads Female Sample 2
Fetal_MaleGonads	SRR538806	Fetal_Male_Gonads	EmbrGonads	100PE	113567195	PMID: 23531366	4.5 day gonad sample from 16 pooled males 1
Fetal_MaleGonads	SRR538807	Fetal_Male_Gonads	EmbrGonads	100PE	105354986	PMID: 23531366	4.5 day gonad sample from 16 pooled males 2
Testis_a	SRR306721	Testis	Testis	76SE	8765672	PMID: 22012392, GEO: GSM752567	gga ts M 1
Testis_a	SRR306722	Testis	Testis	76SE	21485168	PMID: 22012392, GEO: GSM752567	gga ts M 1
Testis_a	SRR306723	Testis	Testis	76SE	36899431	PMID: 22012392, GEO: GSM752568	gga ts M 2
Testis_a	SRR594508	Testis	Testis	80PE	115791891	PMID: 23258891, GEO: GSM1020755	chicken_a_testes
Testis_b	ERR753994	Testis	Testis	100PE	55900841	PRJEB8390	Male1Testes
Testis_b	ERR754007	Testis	Testis	100PE	46864991	PRJEB8390	Male2Testes
Testis_b	ERR754008	Testis	Testis	100PE	18510241	PRJEB8390	Male2Testes
Testis_b	ERR754017	Testis	Testis	100PE	54656688	PRJEB8390	Male3Testes
Testis_b	ERR754027	Testis	Testis	100PE	51790440	PRJEB8390	Male4Testes
Testis_b	ERR754035	Testis	Testis	100PE	48860708	PRJEB8390	Male5Testes
Embr_Scales	SRR2043061	Embr_Scales	EmbrScales	50SE	40917230	PRJNA285133	Chicken embryonic reticulate scale E16
Embr_Scales	SRR2043062	Embr_Scales	EmbrScales	50SE	21717514	PRJNA285133	Chicken embryonic reticulate scale E16
Embr_Scales	SRR2043059	Embr_Scales	EmbrScales	50SE	32266297	PRJNA285133	Chicken embryonic reticulate scale E14
Embr_Scales	SRR2043060	Embr_Scales	EmbrScales	50SE	30461395	PRJNA285133	Chicken embryonic reticulate scale E14
Embr_Scales	SRR2043056	Embr_Scales	EmbrScales	50SE	30448943	PRJNA285133	Chicken embryonic scutate scale E16
Embr_Scales	SRR2043057	Embr_Scales	EmbrScales	50SE	36412977	PRJNA285133	Chicken embryonic scutate scale E16
Embr_Scales	SRR2043054	Embr_Scales	EmbrScales	50SE	33028849	PRJNA285133	Chicken embryonic scutate scale E14
Embr_Scales	SRR2043055	Embr_Scales	EmbrScales	50SE	32015001	PRJNA285133	Chicken embryonic scutate scale E14
NeuralCrest	SRR1051528	Neural_Crest	NeuralCrest	50SE	22909489	PRJNA226749	CNC1, neural crest obtained from chicken embryos (embryonic stage HH10)
NeuralCrest	SRR1051536	Neural_Crest	NeuralCrest	50SE	33225724	PRJNA226749	CNC2, neural crest obtained from chicken embryos (embryonic stage HH10)
Whole_Brain	SRR594500	Whole_Brain	Neural	80/75PE	117728780	PMID: 23258891 GEO: GSM1020747	chicken_a_brain
Whole_Brain	SRR579551	Whole_Brain	Neural	72PE	77336249	PMID: 23258890 GEO: GSM1015156	Chicken brain
Whole_Brain	SRR306710	Whole_Brain	Neural	76SE	19476908	PMID: 22012392 GEO: GSM752557	gga br F 1
Whole_Brain	SRR306711	Whole_Brain	Neural	76SE	17557038	PMID: 22012392 GEO: GSM752558	gga br M 1
Brain_Fem	ERR753940	Whole_Brain	Neural	100PE	54929137	PRJEB8390	Female1Brain
Brain_Fem	ERR753949	Whole_Brain	Neural	100PE	60531222	PRJEB8390	Female2Brain
Brain_Fem	ERR753956	Whole_Brain	Neural	100PE	52681239	PRJEB8390	Female3Brain
Brain_Fem	ERR753965	Whole_Brain	Neural	100PE	93975002	PRJEB8390	Female4Brain
Brain_Fem	ERR753974	Whole_Brain	Neural	100PE	74970801	PRJEB8390	Female5Brain
Brain_Male	ERR753986	Whole_Brain	Neural	100PE	54053288	PRJEB8390	Male1Brain
Brain_Male	ERR753995	Whole_Brain	Neural	100PE	45365287	PRJEB8390	Male2Brain
Brain_Male	ERR753996	Whole_Brain	Neural	100PE	17933604	PRJEB8390	Male2Brain
Brain_Male	ERR754009	Whole_Brain	Neural	100PE	54425377	PRJEB8390	Male3Brain
Brain_Male	ERR754018	Whole_Brain	Neural	100PE	55844417	PRJEB8390	Male4Brain
Brain_Male	ERR754028	Whole_Brain	Neural	100PE	58283153	PRJEB8390	Male5Brain
Telencephalon	SRR934017	Telencephalon	Neural	50PE	18755419	PRJNA210201, PMID: 23878249	chicken striatum
Telencephalon	SRR934018	Telencephalon	Neural	50PE	16408028	PRJNA210201, PMID: 23878249	chicken striatum
Telencephalon	SRR934010	Telencephalon	Neural	51PE	15650047	PRJNA210201, PMID: 23878249	chicken hippocampus
Telencephalon	SRR934011	Telencephalon	Neural	51PE	18662687	PRJNA210201, PMID: 23878249	chicken hippocampus
Telencephalon	SRR934012	Telencephalon	Neural	51PE	17486567	PRJNA210201, PMID: 23878249	chicken hippocampus
Telencephalon	SRR934007	Telencephalon	Neural	51PE	15083480	PRJNA210201, PMID: 23878249	dorsolateral cortex
Telencephalon	SRR934008	Telencephalon	Neural	51PE	19306874	PRJNA210201, PMID: 23878249	dorsolateral cortex
Telencephalon	SRR934009	Telencephalon	Neural	51PE	17854753	PRJNA210201, PMID: 23878249	dorsolateral cortex
Telencephalon	SRR934019	Telencephalon	Neural	50PE	16648850	PRJNA210201, PMID: 23878249	hyperpallium
Telencephalon	SRR934020	Telencephalon	Neural	50PE	15591524	PRJNA210201, PMID: 23878249	hyperpallium
Telencephalon	SRR934015	Telencephalon	Neural	50PE	21548286	PRJNA210201, PMID: 23878249	nidopallium
Telencephalon	SRR934016	Telencephalon	Neural	50PE	19547888	PRJNA210201, PMID: 23878249	nidopallium
Telencephalon	SRR934013	Telencephalon	Neural	50PE	15777256	PRJNA210201, PMID: 23878249	mesopallium
Telencephalon	SRR934014	Telencephalon	Neural	50PE	18498423	PRJNA210201, PMID: 23878249	mesopallium
Telencephalon	SRR934004	Telencephalon	Neural	50PE	15942113	PRJNA210201, PMID: 23878249	arcopallium
Telencephalon	SRR934005	Telencephalon	Neural	50PE	19716270	PRJNA210201, PMID: 23878249	arcopallium
Telencephalon	SRR934006	Telencephalon	Neural	50PE	18204548	PRJNA210201, PMID: 23878249	arcopallium
Cerebellum	SRR306712	Cerebellum	Neural	76SE	23627599	PMID: 22012392 GEO: GSM752559	gga cb F 1
Cerebellum	SRR306713	Cerebellum	Neural	76SE	21983420	PMID: 22012392 GEO: GSM752560	gga cb M 1
Heart_a	SRR594502	Heart	Muscle	80PE	107873185	PMID: 23258891 GEO: GSM1020749	chicken_a_heart
Heart_a	SRR579554	Heart	Muscle	72PE	65364008	PMID: 23258890 GEO: GSM1015159	Chicken heart
Heart_a	SRR306714	Heart	Muscle	76SE	23004385	PMID: 22012392 GEO: GSM752561	gga ht F 1
Heart_a	SRR306715	Heart	Muscle	76SE	21117498	PMID: 22012392 GEO: GSM752562	gga ht M 1
Heart_Fem	ERR348569	Heart	Muscle	100PE	63822836	PRJEB4677	heart_female_mRNA
Heart_Male	ERR348583	Heart	Muscle	100PE	60156103	PRJEB4677	heart_male_mRNA
Muscle_a	SRR594506	Muscle	Muscle	80PE	119026701	PMID: 23258891 GEO: GSM1020753	chicken_a_skm
Muscle_a	SRR579555	Muscle	Muscle	72PE	75010041	PMID: 23258890 GEO: GSM1015160	Chicken skeletal muscle
Muscle_Fem	ERR348560	Muscle	Muscle	100PE	83027345	PRJEB4677	muscle_female_mRNA
Muscle_Male	ERR348578	Muscle	Muscle	100PE	70324600	PRJEB4677	muscle_male_mRNA
Tibial_bone	ERR569563	Tibial_bone	Immune_hematopoiesis	100PE	7918213	PRJEB6782	Chicken Tibial Bone, Sample 1
Tibial_bone	ERR569569	Tibial_bone	Immune_hematopoiesis	100PE	8430558	PRJEB6782	Chicken Tibial Bone, Sample 1
Tibial_bone	ERR569579	Tibial_bone	Immune_hematopoiesis	100PE	7876453	PRJEB6782	Chicken Tibial Bone, Sample 1
Tibial_bone	ERR569564	Tibial_bone	Immune_hematopoiesis	100PE	8582037	PRJEB6782	Chicken Tibial Bone, Sample 2
Tibial_bone	ERR569571	Tibial_bone	Immune_hematopoiesis	100PE	9037448	PRJEB6782	Chicken Tibial Bone, Sample 2
Tibial_bone	ERR569575	Tibial_bone	Immune_hematopoiesis	100PE	8524422	PRJEB6782	Chicken Tibial Bone, Sample 2
Tibial_bone	ERR569570	Tibial_bone	Immune_hematopoiesis	100PE	6536955	PRJEB6782	Chicken Tibial Bone, Sample 3
Tibial_bone	ERR569572	Tibial_bone	Immune_hematopoiesis	100PE	6783539	PRJEB6782	Chicken Tibial Bone, Sample 3
Tibial_bone	ERR569574	Tibial_bone	Immune_hematopoiesis	100PE	6482578	PRJEB6782	Chicken Tibial Bone, Sample 3
Tibial_bone	ERR569561	Tibial_bone	Immune_hematopoiesis	100PE	9444984	PRJEB6782	Chicken Tibial Bone, Sample 4
Tibial_bone	ERR569568	Tibial_bone	Immune_hematopoiesis	100PE	8960039	PRJEB6782	Chicken Tibial Bone, Sample 4
Tibial_bone	ERR569577	Tibial_bone	Immune_hematopoiesis	100PE	9005859	PRJEB6782	Chicken Tibial Bone, Sample 4
Tibial_bone	ERR569566	Tibial_bone	Immune_hematopoiesis	100PE	8341677	PRJEB6782	Chicken Tibial Bone, Sample 5
Tibial_bone	ERR569567	Tibial_bone	Immune_hematopoiesis	100PE	7981741	PRJEB6782	Chicken Tibial Bone, Sample 5
Tibial_bone	ERR569583	Tibial_bone	Immune_hematopoiesis	100PE	7942173	PRJEB6782	Chicken Tibial Bone, Sample 5
Tibial_bone	ERR569578	Tibial_bone	Immune_hematopoiesis	100PE	9853457	PRJEB6782	Chicken Tibial Bone, Sample 6
Tibial_bone	ERR569581	Tibial_bone	Immune_hematopoiesis	100PE	10335156	PRJEB6782	Chicken Tibial Bone, Sample 6
Tibial_bone	ERR569582	Tibial_bone	Immune_hematopoiesis	100PE	9790854	PRJEB6782	Chicken Tibial Bone, Sample 6
Tibial_bone	ERR569565	Tibial_bone	Immune_hematopoiesis	100PE	7936847	PRJEB6782	Chicken Tibial Bone, Sample 7
Tibial_bone	ERR569573	Tibial_bone	Immune_hematopoiesis	100PE	8524137	PRJEB6782	Chicken Tibial Bone, Sample 7
Tibial_bone	ERR569580	Tibial_bone	Immune_hematopoiesis	100PE	7965576	PRJEB6782	Chicken Tibial Bone, Sample 7
Tibial_bone	ERR569560	Tibial_bone	Immune_hematopoiesis	100PE	8679961	PRJEB6782	Chicken Tibial Bone, Sample 8
Tibial_bone	ERR569562	Tibial_bone	Immune_hematopoiesis	100PE	9201662	PRJEB6782	Chicken Tibial Bone, Sample 8
Tibial_bone	ERR569576	Tibial_bone	Immune_hematopoiesis	100PE	8733975	PRJEB6782	Chicken Tibial Bone, Sample 8
AbdominalFat	SRR636255	Abdominal_Fat	Tissues	101PE	41861489	GEO: GSM1054365	Chicken Abdominal fat, fat line (FL), 7 week of age, biological replicate 3, techical replicate 1
AbdominalFat	SRR636256	Abdominal_Fat	Tissues	105PE	25319752	GEO: GSM1054366	Chicken Abdominal fat, fat line (FL), 7 week of age, biological replicate 3, techical replicate 2
AbdominalFat	SRR636257	Abdominal_Fat	Tissues	105PE	25363535	GEO: GSM1054367	Chicken Abdominal fat, fat line (FL), 7 week of age, biological replicate 3, techical replicate 3
AbdominalFat	SRR636258	Abdominal_Fat	Tissues	101PE	45597898	GEO: GSM1054368	Chicken Abdominal fat, fat line (FL), 7 week of age, biological replicate 4, techical replicate 1
AbdominalFat	SRR636259	Abdominal_Fat	Tissues	105PE	13130850	GEO: GSM1054369	Chicken Abdominal fat, fat line (FL), 7 week of age, biological replicate 4, techical replicate 2
AbdominalFat	SRR636260	Abdominal_Fat	Tissues	105PE	13135484	GEO: GSM1054370	Chicken Abdominal fat, fat line (FL), 7 week of age, biological replicate 4, techical replicate 3
AbdominalFat	SRR636261	Abdominal_Fat	Tissues	101PE	52006731	GEO: GSM1054371	Chicken Abdominal fat, lean line (LL), 7 week of age, biological replicate 1, techical replicate 1
AbdominalFat	SRR636262	Abdominal_Fat	Tissues	105PE	13120176	GEO: GSM1054372	Chicken Abdominal fat, lean line (LL), 7 week of age, biological replicate 1, techical replicate 2
AbdominalFat	SRR636263	Abdominal_Fat	Tissues	105PE	13124062	GEO: GSM1054373	Chicken Abdominal fat, lean line (LL), 7 week of age, biological replicate 1, techical replicate 3
AbdominalFat	SRR636264	Abdominal_Fat	Tissues	101PE	42748646	GEO: GSM1054374	Chicken Abdominal fat, lean line (LL), 7 week of age, biological replicate 2, techical replicate 1
AbdominalFat	SRR636265	Abdominal_Fat	Tissues	105PE	25108941	GEO: GSM1054375	Chicken Abdominal fat, lean line (LL), 7 week of age, biological replicate 2, techical replicate 2
AbdominalFat	SRR636266	Abdominal_Fat	Tissues	105PE	25227425	GEO: GSM1054376	Chicken Abdominal fat, lean line (LL), 7 week of age, biological replicate 2, techical replicate 3
Bursa_Fem	ERR753941	Bursa	Immune_hematopoiesis	100PE	55927022	PRJEB8390	Female1Bursa
Bursa_Fem	ERR753950	Bursa	Immune_hematopoiesis	100PE	63396963	PRJEB8390	Female2Bursa
Bursa_Fem	ERR753957	Bursa	Immune_hematopoiesis	100PE	63011344	PRJEB8390	Female3Bursa
Bursa_Fem	ERR753966	Bursa	Immune_hematopoiesis	100PE	53875096	PRJEB8390	Female4Bursa
Bursa_Fem	ERR753975	Bursa	Immune_hematopoiesis	100PE	73079990	PRJEB8390	Female5Bursa
Bursa_Male	ERR753987	Bursa	Immune_hematopoiesis	100PE	64526659	PRJEB8390	Male1Bursa
Bursa_Male	ERR753997	Bursa	Immune_hematopoiesis	100PE	51822524	PRJEB8390	Male2Bursa
Bursa_Male	ERR754010	Bursa	Immune_hematopoiesis	100PE	53049422	PRJEB8390	Male3Bursa
Bursa_Male	ERR754019	Bursa	Immune_hematopoiesis	100PE	75129892	PRJEB8390	Male4Bursa
Bursa_Male	ERR754029	Bursa	Immune_hematopoiesis	100PE	64748314	PRJEB8390	Male5Bursa
Colon	SRR594501	Colon	Digestive_tract		100719994	PMID: 23258891 GEO: GSM1020748	chicken_a_colon
Kidney_a	SRR594503	Kidney	Tissues	80PE	107873185	PMID: 23258891 GEO: GSM1020749	chicken_a_kidney
Kidney_a	SRR579553	Kidney	Tissues	72PE	78034316	PMID: 23258890 GEO: GSM1015158	Chicken kidney
Kidney_a	SRR306716	Kidney	Tissues	76SE	23021153	PMID: 22012392 GEO: GSM752563	gga kd F 1
Kidney_a	SRR306717	Kidney	Tissues	76SE	22796688	PMID: 22012392 GEO: GSM752564	gga kd M 1
Kidney_Fem	ERR348574	Kidney	Tissues	100PE	155731074	PRJEB4677	kidney_female_mRNA
Kidney_Male	ERR348561	Kidney	Tissues	100PE	74513824	PRJEB4677	kidney_male_mRNA
Liver_a	SRR594504	Liver	Tissues	80PE	111950293	PMID: 23258891 GEO: GSM1020751	chicken_a_liver
Liver_a	SRR579552	Liver	Tissues	72PE	58286862	PMID: 23258890 GEO: GSM1015157	Chicken liver
Liver_a	SRR306718	Liver	Tissues	76SE	30245926	PMID: 22012392 GEO: GSM752565	gga lv F 1
Liver_a	SRR306719	Liver	Tissues	76SE	8595446	PMID: 22012392 GEO: GSM752566	gga lv M 1
Liver_a	SRR306720	Liver	Tissues	76SE	22542615	PMID: 22012392 GEO: GSM752566	gga lv M 1
Liver_Fem	ERR348573	Liver	Tissues	100PE	55229488	PRJEB4677	liver_female_mRNA
Liver_Male	ERR348586	Liver	Tissues	100PE	49742180	PRJEB4677	liver_male_mRNA
Lung_Fem	ERR348582	Lung	Tissues	100PE	45553267	PRJEB4677	lung_female_mRNA
Lung_Male	ERR348579	Lung	Tissues	100PE	51876771	PRJEB4677	lung_male_mRNA
Lung_a	SRR594505	Lung	Tissues	80PE	91606960	PMID: 23258891 GEO: GSM1020752	chicken_a_lung
Magnum	SRR1182481	Magnum	Tissues	100PE	32590753	PRJNA229361	Magnum in D1
Magnum	SRR1185950	Magnum	Tissues	100PE	34697353	PRJNA229361	Magnum in D2
Magnum	SRR1635918	Magnum	Tissues	100PE	34410159	PRJNA229361	Magnum in D3
Magnum	SRR2973612	Magnum	Tissues	100PE	29564287	PRJNA229361	Magnum in D3 (technical repeat)
Magnum	SRR1636051	Magnum	Tissues	100PE	35619560	PRJNA229361	Magnum in D4
Magnum	SRR2973613	Magnum	Tissues	100PE	25654122	PRJNA229361	Magnum in D4 (technical repeat)
Magnum	SRR1639602	Magnum	Tissues	100PE	35619560	PRJNA229361	Magnum in L
Ovarium	ERR753947	Ovarium	Ovary	100PE	68972819	PRJEB8390	Female1Ovarium
Ovarium	ERR753955	Ovarium	Ovary	100PE	49908576	PRJEB8390	Female2Ovarium
Ovarium	ERR753963	Ovarium	Ovary	100PE	53812673	PRJEB8390	Female3Ovarium
Ovarium	ERR753972	Ovarium	Ovary	100PE	60281752	PRJEB8390	Female4Ovarium
Ovarium	ERR753983	Ovarium	Ovary	100PE	74619668	PRJEB8390	Female5Ovarium
Spleen_Fem	ERR348568	Spleen	Immune_hematopoiesis	100PE	68516511	PRJEB4677	spleen_female_mRNA
Spleen_Male	ERR348585	Spleen	Immune_hematopoiesis	100PE	65152223	PRJEB4677	spleen_male_mRNA
Spleen_a	SRR594507	Spleen	Immune_hematopoiesis	80PE	113458402	PMID: 23258891 GEO: GSM1020754	chicken_a_spleen
BMDMacroph	ERR664972	BMD_Macrophages	Immune_hematopoiesis	101PE	37587363	PRJEB7662	723_3_ACAGTG_L001_BMDM
BMDMacroph	ERR664975	BMD_Macrophages	Immune_hematopoiesis	101PE	64567498	PRJEB7662	723_4_GCCAAT_L001_BMDM
CL_DF1	ERR664973	CL_DF1	CLines	101PE	47078052	PRJEB7662	723_2_TGACCA_L001_DF1
CL_DT40_a	SRR912956	CL_DT40	CLines	101PE	21368939	PRJNA203279	DT40_RNA_1
CL_DT40_a	SRR913007	CL_DT40	CLines	101PE	92260459	PRJNA203279	DT40_RNA_2
CL_DT40_b	SRR2056331	CL_DT40	CLines	101PE	71155779	PMID: 26293963 GEO: GSM1705383	dt40 wildtype_rep1
CL_DT40_b	SRR2056332	CL_DT40	CLines	101PE	58861118	PMID: 26293963 GEO: GSM1705384	dt40 wildtype_rep2

## Sheet: Special Datasets
Species	Dataset	Sample	Group	SRA_ID	Read_length	Read_number	Source	Info
Hsa	Autistic and control brains	Cont_BA41_a	Control	NA			PMID: 25525873	ASD_AN02987_ba41_42_22_1st
Hsa	Autistic and control brains	Cont_BA41_a	Control	NA			PMID: 25525873	ASD_AN04682_ba41_42_22_1st
Hsa	Autistic and control brains	Cont_BA41_a	Control	NA			PMID: 25525873	ASD_UMB5278_ba41_42_22_1st
Hsa	Autistic and control brains	Cont_BA41_a	Control	NA			PMID: 25525873	ASD_AN01570_ba41_42_22_59
Hsa	Autistic and control brains	Cont_BA41_b	Control	NA			PMID: 25525873	ASD_AN00493_ba41_42_22_105
Hsa	Autistic and control brains	Cont_BA41_b	Control	NA			PMID: 25525873	ASD_AN12457_ba41_42_22_35
Hsa	Autistic and control brains	Cont_BA41_b	Control	NA			PMID: 25525873	ASD_AN08166_ba41_42_22_86
Hsa	Autistic and control brains	Cont_BA41_b	Control	NA			PMID: 25525873	ASD_AN08792_ba41_42_22_102
Hsa	Autistic and control brains	Cont_BA41_c	Control	NA			PMID: 25525873	ASD_AN01971_ba41_42_22_1st
Hsa	Autistic and control brains	Cont_BA41_c	Control	NA			PMID: 25525873	ASD_AN03632_ba41_42_22_1st
Hsa	Autistic and control brains	Cont_BA41_c	Control	NA			PMID: 25525873	ASD_AN08043_ba41_42_22_1st
Hsa	Autistic and control brains	Cont_BA41_c	Control	NA			PMID: 25525873	ASD_AN09714_ba41_42_22_1st
Hsa	Autistic and control brains	Cont_BA9_a	Control	NA			PMID: 25525873	Cont_AN17425_ba9_1st
Hsa	Autistic and control brains	Cont_BA9_a	Control	NA			PMID: 25525873	Cont_AN07444_ba9_3rd
Hsa	Autistic and control brains	Cont_BA9_a	Control	NA			PMID: 25525873	Cont_UMB4590_ba9_1st
Hsa	Autistic and control brains	Cont_BA9_a	Control	NA			PMID: 25525873	Cont_AN10833_ba9_46
Hsa	Autistic and control brains	Cont_BA9_b	Control	NA			PMID: 25525873	Cont_AN14757_ba9_2nd
Hsa	Autistic and control brains	Cont_BA9_b	Control	NA			PMID: 25525873	Cont_AN19760_ba9_25
Hsa	Autistic and control brains	Cont_BA9_b	Control	NA			PMID: 25525873	Cont_AN12137_ba9_3rd
Hsa	Autistic and control brains	Cont_BA9_b	Control	NA			PMID: 25525873	Cont_UMB5079_ba9_2nd
Hsa	Autistic and control brains	Cont_BA9_c	Control	NA			PMID: 25525873	Cont_AN08161_ba9_1st
Hsa	Autistic and control brains	Cont_BA9_c	Control	NA			PMID: 25525873	Cont_AN00142_ba9_57
Hsa	Autistic and control brains	Cont_BA9_c	Control	NA			PMID: 25525873	Cont_UMB4842_ba9_2nd
Hsa	Autistic and control brains	Cont_BA9_c	Control	NA			PMID: 25525873	Cont_AN13295_ba9_88
Hsa	Autistic and control brains	ASD_BA41_a	ASD	NA			PMID: 25525873	ASD_AN02987_ba41_42_22_1st
Hsa	Autistic and control brains	ASD_BA41_a	ASD	NA			PMID: 25525873	ASD_AN04682_ba41_42_22_1st
Hsa	Autistic and control brains	ASD_BA41_a	ASD	NA			PMID: 25525873	ASD_UMB5278_ba41_42_22_1st
Hsa	Autistic and control brains	ASD_BA41_a	ASD	NA			PMID: 25525873	ASD_AN01570_ba41_42_22_59
Hsa	Autistic and control brains	ASD_BA41_b	ASD	NA			PMID: 25525873	ASD_AN00493_ba41_42_22_105
Hsa	Autistic and control brains	ASD_BA41_b	ASD	NA			PMID: 25525873	ASD_AN12457_ba41_42_22_35
Hsa	Autistic and control brains	ASD_BA41_b	ASD	NA			PMID: 25525873	ASD_AN08166_ba41_42_22_86
Hsa	Autistic and control brains	ASD_BA41_b	ASD	NA			PMID: 25525873	ASD_AN08792_ba41_42_22_102
Hsa	Autistic and control brains	ASD_BA41_c	ASD	NA			PMID: 25525873	ASD_AN01971_ba41_42_22_1st
Hsa	Autistic and control brains	ASD_BA41_c	ASD	NA			PMID: 25525873	ASD_AN03632_ba41_42_22_1st
Hsa	Autistic and control brains	ASD_BA41_c	ASD	NA			PMID: 25525873	ASD_AN08043_ba41_42_22_1st
Hsa	Autistic and control brains	ASD_BA41_c	ASD	NA			PMID: 25525873	ASD_AN09714_ba41_42_22_1st
Hsa	Autistic and control brains	ASD_BA9_a	ASD	NA			PMID: 25525873	ASD_AN04682_ba9_1st
Hsa	Autistic and control brains	ASD_BA9_a	ASD	NA			PMID: 25525873	ASD_UMB5278_ba9_1st
Hsa	Autistic and control brains	ASD_BA9_a	ASD	NA			PMID: 25525873	ASD_AN01570_ba9_58
Hsa	Autistic and control brains	ASD_BA9_a	ASD	NA			PMID: 25525873	ASD_AN09730_ba9_118
Hsa	Autistic and control brains	ASD_BA9_b	ASD	NA			PMID: 25525873	ASD_AN00493_ba9_104
Hsa	Autistic and control brains	ASD_BA9_b	ASD	NA			PMID: 25525873	ASD_AN12457_ba9_34
Hsa	Autistic and control brains	ASD_BA9_b	ASD	NA			PMID: 25525873	ASD_AN08792_ba9_101
Hsa	Autistic and control brains	ASD_BA9_b	ASD	NA			PMID: 25525873	ASD_AN08166_ba9_85
Hsa	Autistic and control brains	ASD_BA9_c	ASD	NA			PMID: 25525873	ASD_AN01971_ba9_1st
Hsa	Autistic and control brains	ASD_BA9_c	ASD	NA			PMID: 25525873	ASD_AN03632_ba9_2nd
Hsa	Autistic and control brains	ASD_BA9_c	ASD	NA			PMID: 25525873	ASD_AN09714_ba9_1st
Hsa	Autistic and control brains	ASD_BA9_c	ASD	NA			PMID: 25525873	ASD_AN08043_ba9_1st
Hsa	Autistic and control brains	Dup15q_BA41_a	Dup15q	NA			PMID: 25525873	Dup15q_AN03935_ba41_42_22_1st
Hsa	Autistic and control brains	Dup15q_BA41_a	Dup15q	NA			PMID: 25525873	Dup15q_AN09402_ba41_42_22_1st
Hsa	Autistic and control brains	Dup15q_BA41_a	Dup15q	NA			PMID: 25525873	Dup15q_AN14762_ba41_42_22_1st
Hsa	Autistic and control brains	Dup15q_BA41_a	Dup15q	NA			PMID: 25525873	Dup15q_AN17138_ba41_42_22_44
Hsa	Autistic and control brains	Dup15q_BA41_b	Dup15q	NA			PMID: 25525873	Dup15q_AN05983_ba41_42_22_1st
Hsa	Autistic and control brains	Dup15q_BA41_b	Dup15q	NA			PMID: 25525873	Dup15q_AN11931_ba41_42_22_1st
Hsa	Autistic and control brains	Dup15q_BA41_b	Dup15q	NA			PMID: 25525873	Dup15q_AN14829_ba41_42_22_1st
Hsa	Autistic and control brains	Dup15q_BA9_a	Dup15q	NA			PMID: 25525873	Dup15q_AN03935_ba9_2nd
Hsa	Autistic and control brains	Dup15q_BA9_a	Dup15q	NA			PMID: 25525873	Dup15q_AN09402_ba9
Hsa	Autistic and control brains	Dup15q_BA9_a	Dup15q	NA			PMID: 25525873	Dup15q_AN14762_ba9_1st
Hsa	Autistic and control brains	Dup15q_BA9_a	Dup15q	NA			PMID: 25525873	Dup15q_AN17138_ba9_43
Hsa	Autistic and control brains	Dup15q_BA9_b	Dup15q	NA			PMID: 25525873	Dup15q_AN05983_ba9
Hsa	Autistic and control brains	Dup15q_BA9_b	Dup15q	NA			PMID: 25525873	Dup15q_AN11931_ba9
Hsa	Autistic and control brains	Dup15q_BA9_b	Dup15q	NA			PMID: 25525873	Dup15q_AN14829_ba9_1st
Hsa	Autistic and control brains	Dup15q_vermis	Dup15q	NA			PMID: 25525873	Dup15q_AN03935_vermis_1st
Hsa	Autistic and control brains	Dup15q_vermis	Dup15q	NA			PMID: 25525873	Dup15q_AN05983_vermis_1st
Hsa	Autistic and control brains	Dup15q_vermis	Dup15q	NA			PMID: 25525873	Dup15q_AN09402_vermis_1st
Hsa	Autistic and control brains	Dup15q_vermis	Dup15q	NA			PMID: 25525873	Dup15q_AN14762_vermis_1st
Hsa	Pancreatic cell types	Pancreas_Acinar_old	Pancreas_Acinar	SRR1299321	101PE	82975528		RSq06_33_acinar
Hsa	Pancreatic cell types	Pancreas_Acinar_old	Pancreas_Acinar	SRR1299338	101PE	88070995		RSq34_42_acinar
Hsa	Pancreatic cell types	Pancreas_Acinar_young	Pancreas_Acinar	SRR1299319	101PE	95583450		RSq02_1.5_acinar
Hsa	Pancreatic cell types	Pancreas_Acinar_young	Pancreas_Acinar	SRR1299333	101PE	72755938		RSq28_5_acinar
Hsa	Pancreatic cell types	Pancreas_Alpha_old	Pancreas_Alpha	SRR1299320	101PE	78916559		RSq03_33_alpha
Hsa	Pancreatic cell types	Pancreas_Alpha_old	Pancreas_Alpha	SRR1299322	101PE	107485175		RSq09_40_alpha
Hsa	Pancreatic cell types	Pancreas_Alpha_old	Pancreas_Alpha	SRR1299325	101PE	24271967		RSq13_28_alpha
Hsa	Pancreatic cell types	Pancreas_Alpha_old	Pancreas_Alpha	SRR1299328	101PE	126702294		RSq16_66_alpha
Hsa	Pancreatic cell types	Pancreas_Alpha_old	Pancreas_Alpha	SRR1299334	101PE	92297804		RSq29_48_alpha
Hsa	Pancreatic cell types	Pancreas_Alpha_young	Pancreas_Alpha	SRR1299331	101PE	99209605		RSq25_5_alpha
Hsa	Pancreatic cell types	Pancreas_Alpha_young	Pancreas_Alpha	SRR1299339	101PE	96458585		RSq35_5_alpha
Hsa	Pancreatic cell types	Pancreas_Alpha_young	Pancreas_Alpha	SRR1299341	101PE	46364400		RSq38_0.8_alpha
Hsa	Pancreatic cell types	Pancreas_Alpha_young	Pancreas_Alpha	SRR1299344	100PE	53748100		RSq42_1.4_alpha
Hsa	Pancreatic cell types	Pancreas_Alpha_young	Pancreas_Alpha	SRR1299346	100PE	20064988		RSq46_6_alpha
Hsa	Pancreatic cell types	Pancreas_Beta_old	Pancreas_Beta	SRR1299323	101PE	92983647		RSq10_40_beta
Hsa	Pancreatic cell types	Pancreas_Beta_old	Pancreas_Beta	SRR1299324	101PE	108636659		RSq12_33_beta
Hsa	Pancreatic cell types	Pancreas_Beta_old	Pancreas_Beta	SRR1299326	101PE	130004997		RSq14_28_beta
Hsa	Pancreatic cell types	Pancreas_Beta_old	Pancreas_Beta	SRR1299329	101PE	58202935		RSq18_66_beta
Hsa	Pancreatic cell types	Pancreas_Beta_old	Pancreas_Beta	SRR1299335	101PE	80460228		RSq31_48_beta
Hsa	Pancreatic cell types	Pancreas_Beta_young	Pancreas_Beta	SRR1299332	101PE	91002211		RSq26_5_beta
Hsa	Pancreatic cell types	Pancreas_Beta_young	Pancreas_Beta	SRR1299340	101PE	83607685		RSq37_5_beta
Hsa	Pancreatic cell types	Pancreas_Beta_young	Pancreas_Beta	SRR1299342	101PE	74801279		RSq39_0.8_beta
Hsa	Pancreatic cell types	Pancreas_Beta_young	Pancreas_Beta	SRR1299343	101PE	79706118		RSq40_1.4_beta
Hsa	Pancreatic cell types	Pancreas_Beta_young	Pancreas_Beta	SRR1299345	100PE	19730757		RSq45_6_beta
Hsa	Pancreatic cell types	Pancreas_Duct_old	Pancreas_Duct	SRR1299327	101PE	62486136		RSq15_33_duct
Hsa	Pancreatic cell types	Pancreas_Duct_old	Pancreas_Duct	SRR1299327	101PE	81897813		RSq33_54_duct
Hsa	Pancreatic cell types	Pancreas_Duct_young	Pancreas_Duct	SRR1299330	101PE	95059281		RSq24_5_duct
Hsa	Pancreatic cell types	Pancreas_Duct_young	Pancreas_Duct	SRR1299336	101PE	77966118		RSq32_1.5_duct
Mmu	Muscular differentiation	Myoblast_0h	Myoblast_0h	SRR037945	76PE	22205089	PMID: 20436464, GEO: GSM521256	-24 hours
Mmu	Muscular differentiation	Myoblast_0h	Myoblast_0h	SRR037946	76PE	19979450	PMID: 20436464, GEO: GSM521256	-24 hours
Mmu	Muscular differentiation	Myoblast_0h	Myoblast_0h	SRR533644	36PE	34984510	PMID: 22901804 GEO: GSM981210	C2C12-control
Mmu	Muscular differentiation	Myoblast_60h	Myoblast_60h	SRR037947	76PE	24336126	PMID: 20436464 GEO: GSM521257	60 hours
Mmu	Muscular differentiation	Myoblast_60h	Myoblast_60h	SRR037948	76PE	22868507	PMID: 20436464 GEO: GSM521257	60 hours
Mmu	Muscular differentiation	Myoblast_60h	Myoblast_60h	SRR037949	76PE	22987398	PMID: 20436464 GEO: GSM521257	60 hours
Mmu	Muscular differentiation	Myoblast_120h	Myoblast_120h	SRR037950	76PE	19115416	PMID: 20436464 GEO: GSM521258	120 hours
Mmu	Muscular differentiation	Myoblast_120h	Myoblast_120h	SRR037951	76PE	21953690	PMID: 20436464 GEO: GSM521258	120 hours
Mmu	Muscular differentiation	Myoblast_168h	Myoblast_168h	SRR037952	76PE	18567994	PMID: 20436464 GEO: GSM521259	168 hours
Mmu	Muscular differentiation	Myoblast_168h	Myoblast_168h	SRR037953	76PE	20159779	PMID: 20436464 GEO: GSM521259	168 hours
Mmu	Muscular differentiation	Myoblast_168h	Myoblast_168h	SRR037954	76PE	23060060	PMID: 20436464 GEO: GSM521259	168 hours
Mmu	Muscular differentiation	Muscle_a	Muscle	SRR579550	75PE	79026285	PMID: 23258890 GEO: GSM1015155	Mouse skeletal muscle
Mmu	Muscular differentiation	Muscle_a	Muscle	SRR533639	50PE	10982672	PMID: 22901804 GEO: GSM981205	muscleWT1
Mmu	Muscular differentiation	Muscle_a	Muscle	SRR533640	50PE	10753425	PMID: 22901804 GEO: GSM981206	muscleWT2
Mmu	Muscular differentiation	Muscle_a	Muscle	SRR533641	50PE	9635391	PMID: 22901804 GEO: GSM981207	muscleWT3
Mmu	Muscular differentiation	Muscle_a	Muscle	SRR533642	50PE	10314063	PMID: 22901804 GEO: GSM981208	muscleWT4
Mmu	Muscular differentiation	Muscle_a	Muscle	SRR533643	50PE	10121091	PMID: 22901804 GEO: GSM981209	muscleWT5
Mmu	Muscular differentiation	Muscle_b	Muscle	SRR594399	50PE	113111277	PMID: 23258891 GEO: GSM1020646	mouse_a_skm
Mmu	Muscular differentiation	Muscle_b	Muscle	SRR594407	80PE	117171737	PMID: 23258891 GEO: GSM1020654	mouse_b_skm
Mmu	Muscular differentiation	Muscle_c	Muscle	SRR3705528	51SE	51759718	PMID: 27624101, GEO: GSM2208783	Biceps femoris skeletal muscle, WT, male, 5 weeks, strain C57BL/6J, Wild type sample 956
Mmu	Muscular differentiation	Muscle_c	Muscle	SRR3705527	51SE	43238503	PMID: 27624101, GEO: GSM2208782	Biceps femoris skeletal muscle, WT, male, 5 weeks, strain C57BL/6J, Wild type sample 955
Mmu	Muscular differentiation	Muscle_c	Muscle	SRR3705524	51SE	46607224	PMID: 27624101, GEO: GSM2208779	Biceps femoris skeletal muscle, WT, male, 5 weeks, strain C57BL/6J, Wild type sample 927
Mmu	Muscular differentiation	Muscle_c	Muscle	SRR3705520	51SE	42539250	PMID: 27624101, GEO: GSM2208775	Biceps femoris skeletal muscle, WT, male, 5 weeks, strain C57BL/6J, Wild type sample 912
Mmu	Muscular differentiation	Muscle_c	Muscle	SRR3705519	51SE	32620433	PMID: 27624101, GEO: GSM2208774	Biceps femoris skeletal muscle, WT, male, 5 weeks, strain C57BL/6J, Wild type sample 911
Mmu	Neural differentiation	ESC_DIVm8	ESC	SRR645824	50PE	28858587	PMID: 24358889	Embryonic stem cells (DIV-8)
Mmu	Neural differentiation	ESC_DIVm8	ESC	SRR645826	50PE	30703921	PMID: 24358889	Embryonic stem cells (DIV-8)
Mmu	Neural differentiation	ESC_DIVm8	ESC	SRR645828	50PE	30429743	PMID: 24358889	Embryonic stem cells (DIV-8)
Mmu	Neural differentiation	ESC_DIVm8	ESC	SRR645830	50PE	30610255	PMID: 24358889	Embryonic stem cells (DIV-8)
Mmu	Neural differentiation	NeuroepithCells_DIVm4	NeuroepithCells	SRR645833	50PE	24074664	PMID: 24358889	Neuroepithelial cells (DIV-4)
Mmu	Neural differentiation	NeuroepithCells_DIVm4	NeuroepithCells	SRR645835	50PE	24251725	PMID: 24358889	Neuroepithelial cells (DIV-4)
Mmu	Neural differentiation	NeuroepithCells_DIVm4	NeuroepithCells	SRR645837	50PE	27803658	PMID: 24358889	Neuroepithelial cells (DIV-4)
Mmu	Neural differentiation	RadialGlia_DIV0	Glia	SRR645840	50PE	32228608	PMID: 24358889	Radial glial cells (DIV0)
Mmu	Neural differentiation	RadialGlia_DIV0	Glia	SRR645842	50PE	33554379	PMID: 24358889	Radial glial cells (DIV0)
Mmu	Neural differentiation	RadialGlia_DIV0	Glia	SRR645844	50PE	38533549	PMID: 24358889	Radial glial cells (DIV0)
Mmu	Neural differentiation	Neurons_stIII_IV_DIV7	Neural_Immature	SRR645846	50PE	36313654	PMID: 24358889	Stage III/IV neurons (DIV7)
Mmu	Neural differentiation	Neurons_stIII_IV_DIV7	Neural_Immature	SRR645849	50PE	33835427	PMID: 24358889	Stage III/IV neurons (DIV7)
Mmu	Neural differentiation	Neurons_stIII_IV_DIV7	Neural_Immature	SRR645851	50PE	37487204	PMID: 24358889	Stage III/IV neurons (DIV7)
Mmu	Neural differentiation	Neurons_stIII_IV_DIV7	Neural_Immature	SRR645853	50PE	35857348	PMID: 24358889	Stage III/IV neurons (DIV7)
Mmu	Neural differentiation	Neurons_stIV_V_DIV16	Neural_Immature	SRR645855	50PE	30294729	PMID: 24358889	Stage IV/V neurons (DIV16)
Mmu	Neural differentiation	Neurons_stIV_V_DIV16	Neural_Immature	SRR645857	50PE	27176596	PMID: 24358889	Stage IV/V neurons (DIV16)
Mmu	Neural differentiation	Neurons_stIV_V_DIV16	Neural_Immature	SRR645859	50PE	31697200	PMID: 24358889	Stage IV/V neurons (DIV16)
Mmu	Neural differentiation	Neurons_stIV_V_DIV16	Neural_Immature	SRR645861	50PE	27703894	PMID: 24358889	Stage IV/V neurons (DIV16)
Mmu	Neural differentiation	Neurons_stIV_V_DIV21	Neural_Mature	SRR645863	50PE	27217632	PMID: 24358889	Stage IV/V neurons (DIV21)
Mmu	Neural differentiation	Neurons_stIV_V_DIV21	Neural_Mature	SRR645865	50PE	30106174	PMID: 24358889	Stage IV/V neurons (DIV21)
Mmu	Neural differentiation	Neurons_stIV_V_DIV21	Neural_Mature	SRR645867	50PE	30609990	PMID: 24358889	Stage IV/V neurons (DIV21)
Mmu	Neural differentiation	Neurons_stIV_V_DIV21	Neural_Mature	SRR645870	50PE	30971913	PMID: 24358889	Stage IV/V neurons (DIV21)
Mmu	Neural differentiation	Neurons_stIV_V_DIV28	Neural_Mature	SRR645872	50PE	29865150	PMID: 24358889	Stage IV/V neurons (DIV28)
Mmu	Neural differentiation	Neurons_stIV_V_DIV28	Neural_Mature	SRR645875	50PE	31166866	PMID: 24358889	Stage IV/V neurons (DIV28)
Mmu	Neural differentiation	Neurons_stIV_V_DIV28	Neural_Mature	SRR645877	50PE	28047483	PMID: 24358889	Stage IV/V neurons (DIV28)
Mmu	Neural differentiation	Neurons_stIV_V_DIV28	Neural_Mature	SRR645879	50PE	31403393	PMID: 24358889	Stage IV/V neurons (DIV28)
Mmu	Neural differentiation	Neurons_stI_II_DIV1	Neural_Immature	SRR645930	50PE	41482446	PMID: 24358889	Stage I/II neurons (DIV1)
Mmu	Neural differentiation	Neurons_stI_II_DIV1	Neural_Immature	SRR645932	50PE	42136887	PMID: 24358889	Stage I/II neurons (DIV1)
Mmu	Neural differentiation	Neurons_stI_II_DIV1	Neural_Immature	SRR645934	50PE	27750460	PMID: 24358889	Stage I/II neurons (DIV1)
Mmu	Neural differentiation	Neurons_stI_II_DIV1	Neural_Immature	SRR646092	50PE	30908406	PMID: 24358889	Stage I/II neurons (DIV1)
Mmu	Neural differentiation	Neurons_stIII_IV_DIV7	Neural_Immature	SRR646182	50PE	38487321	PMID: 24358889	Stage III/IV neurons (DIV7)
Mmu	Spermatogenesis	Testis_b	Testis	SRR306775	76SE	19973708	PMID: 22012392 GEO: GSM752629	mmu ts M 1
Mmu	Spermatogenesis	Testis_b	Testis	SRR306776	76SE	29762970	PMID: 22012392 GEO: GSM752630	mmu ts M 2
Mmu	Spermatogenesis	Testis_b	Testis	SRR453140	76PE	37696007	GEO: GSM900193	CSHL_RnaSeq_Testis_adult-8wks
Mmu	Spermatogenesis	Testis_b	Testis	SRR453141	76PE	35861103	GEO: GSM900193	CSHL_RnaSeq_Testis_adult-8wks
Mmu	Spermatogenesis	Testis_b	Testis	SRR453142	76PE	41120376	GEO: GSM900193	CSHL_RnaSeq_Testis_adult-8wks
Mmu	Spermatogenesis	Testis_b	Testis	SRR453143	76PE	36086152	GEO: GSM900193	CSHL_RnaSeq_Testis_adult-8wks
Mmu	Spermatogenesis	Testis_a	Testis	SRR594401	50PE	109199938	PMID: 23258891 GEO: GSM1020648	mouse_a_testes
Mmu	Spermatogenesis	Testis_a	Testis	SRR594409	80PE	116525147	PMID: 23258891 GEO: GSM1020656	mouse_b_testes
Mmu	Spermatogenesis	Testis_c	Testis	SRR5171085	101PE	30611590	GEO: GSM2453435	ENCODE biosample ENCBS928FOT, testis, 10 week, strain C57BL/6J, donor ENCDO072AAA; polyA mRNA
Mmu	Spermatogenesis	Testis_c	Testis	SRR5171084	100/102PE	52230061	GEO: GSM2453434	ENCODE biosample ENCBS928FOT, testis, 10 week, strain C57BL/6J, donor ENCDO072AAA; polyA mRNA
Mmu	Spermatogenesis	Testis_c	Testis	SRR5128065	100PE	41478349	GEO: GSM2439067	Testis, 25 days, strain C57BL/6J, WT; mirVana RNA isolation kit
Mmu	Spermatogenesis	Testis_c	Testis	SRR5128064	100PE	32681336	GEO: GSM2439066	Testis, 25 days, strain C57BL/6J, WT; mirVana RNA isolation kit
Mmu	Spermatogenesis	Testis_c	Testis	SRR5128063	100PE	32556779	GEO: GSM2439065	Testis, 25 days, strain C57BL/6J, WT; mirVana RNA isolation kit
Mmu	Spermatogenesis	Testis_c	Testis	SRR5128062	100PE	34254459	GEO: GSM2439064	Testis, 25 days, strain C57BL/6J, WT; mirVana RNA isolation kit
Mmu	Spermatogenesis	Testis_c	Testis	SRR5128061	100PE	35669488	GEO: GSM2439063	Testis, 25 days, strain C57BL/6J, WT; mirVana RNA isolation kit
Mmu	Spermatogenesis	Testis_c	Testis	SRR5128060	100PE	36895595	GEO: GSM2439062	Testis, 25 days, strain C57BL/6J, WT; mirVana RNA isolation kit
Mmu	Spermatogenesis	PGC_E13_5	PGC	SRR609722	101SE	9310299	PMID: 23151479, 23399596, GEO: GSM1027242	WT rep1
Mmu	Spermatogenesis	PGC_E13_5	PGC	SRR609723	101SE	9588351	PMID: 23151479, 23399596, GEO: GSM1027242	WT rep1
Mmu	Spermatogenesis	PGC_E13_5	PGC	SRR609724	101SE	8255278	PMID: 23151479, 23399596, GEO: GSM1027242	WT rep1
Mmu	Spermatogenesis	PGC_E13_5	PGC	SRR609725	101SE	6250000	PMID: 23151479, 23399596, GEO: GSM1027243	WT rep2
Mmu	Spermatogenesis	PGC_E13_5	PGC	SRR609726	101SE	16078520	PMID: 23151479, 23399596, GEO: GSM1027243	WT rep2
Mmu	Spermatogenesis	PGC_E13_5	PGC	SRR609727	101SE	13916803	PMID: 23151479, 23399596, GEO: GSM1027243	WT rep2
Mmu	Spermatogenesis	PGC_E13_5	PGC	SRR609728	101SE	17157528	PMID: 23151479, 23399596, GEO: GSM1027244	WT rep3
Mmu	Spermatogenesis	PGC_E13_5	PGC	SRR609729	101SE	17659275	PMID: 23151479, 23399596, GEO: GSM1027244	WT rep3
Mmu	Spermatogenesis	PGC_E13_5	PGC	SRR609730	101SE	15384327	PMID: 23151479, 23399596, GEO: GSM1027244	WT rep3
Mmu	Spermatogenesis	PGC_E13_5	PGC	SRR649335	101SE	11266408	PMID: 23151479, 23399596, GEO: GSM1064457	E13.5_m_1
Mmu	Spermatogenesis	PGC_E13_5	PGC	SRR649336	101SE	11609403	PMID: 23151479, 23399596, GEO: GSM1064457	E13.5_m_1
Mmu	Spermatogenesis	PGC_E13_5	PGC	SRR649337	101SE	10127168	PMID: 23151479, 23399596, GEO: GSM1064457	E13.5_m_1
Mmu	Spermatogenesis	PGC_E13_5	PGC	SRR649338	101SE	16863897	PMID: 23151479, 23399596, GEO: GSM1064458	E13.5_m_2
Mmu	Spermatogenesis	PGC_E13_5	PGC	SRR649339	101SE	17361174	PMID: 23151479, 23399596, GEO: GSM1064458	E13.5_m_2
Mmu	Spermatogenesis	PGC_E13_5	PGC	SRR649340	101SE	15237291	PMID: 23151479, 23399596, GEO: GSM1064458	E13.5_m_2
Mmu	Spermatogenesis	PGC_E13_5	PGC	SRR649341	101SE	12588998	PMID: 23151479, 23399596, GEO: GSM1064459	E13.5_m_3
Mmu	Spermatogenesis	PGC_E13_5	PGC	SRR649342	101SE	12967532	PMID: 23151479, 23399596, GEO: GSM1064459	E13.5_m_3
Mmu	Spermatogenesis	PGC_E13_5	PGC	SRR649343	101SE	11353650	PMID: 23151479, 23399596, GEO: GSM1064459	E13.5_m_3
Mmu	Spermatogenesis	PGC_E9_5_11_5	PGC	SRR648686	101SE	10659160	PMID: 23151479, 23399596, GEO: GSM1064148	E9.5_1 2
Mmu	Spermatogenesis	PGC_E9_5_11_5	PGC	SRR648687	101SE	11000360	PMID: 23151479, 23399596, GEO: GSM1064148	E9.5_1 2
Mmu	Spermatogenesis	PGC_E9_5_11_5	PGC	SRR648688	101SE	9535853	PMID: 23151479, 23399596, GEO: GSM1064148	E9.5_1 2
Mmu	Spermatogenesis	PGC_E9_5_11_5	PGC	SRR648689	101SE	12978554	PMID: 23151479, 23399596, GEO: GSM1064149	E9.5_2
Mmu	Spermatogenesis	PGC_E9_5_11_5	PGC	SRR648690	101SE	13363443	PMID: 23151479, 23399596, GEO: GSM1064149	E9.5_2
Mmu	Spermatogenesis	PGC_E9_5_11_5	PGC	SRR648691	101SE	11561435	PMID: 23151479, 23399596, GEO: GSM1064149	E9.5_2
Mmu	Spermatogenesis	PGC_E9_5_11_5	PGC	SRR648692	101SE	11284521	PMID: 23151479, 23399596, GEO: GSM1064150	E11.5_1
Mmu	Spermatogenesis	PGC_E9_5_11_5	PGC	SRR648693	101SE	11571073	PMID: 23151479, 23399596, GEO: GSM1064150	E11.5_1
Mmu	Spermatogenesis	PGC_E9_5_11_5	PGC	SRR648694	101SE	10043334	PMID: 23151479, 23399596, GEO: GSM1064150	E11.5_1
Mmu	Spermatogenesis	PGC_E9_5_11_5	PGC	SRR648695	101SE	14217677	PMID: 23151479, 23399596, GEO: GSM1064151	E11.5_2
Mmu	Spermatogenesis	PGC_E9_5_11_5	PGC	SRR648696	101SE	14657420	PMID: 23151479, 23399596, GEO: GSM1064151	E11.5_2
Mmu	Spermatogenesis	PGC_E9_5_11_5	PGC	SRR648697	101SE	12819417	PMID: 23151479, 23399596, GEO: GSM1064151	E11.5_2
Mmu	Spermatogenesis	Spermatozoa	Spermatozoa	SRR652211	76SE	33235662	PMID: 23791531, GEO: GSM1069643	Spermatozoa, male, C57BL/6, 11 weeks
Mmu	Spermatogenesis	Spermatozoa	Spermatozoa	SRR652212	76SE	35304343	PMID: 23791531, GEO: GSM1069643	Spermatozoa, male, C57BL/6, 11 weeks
Mmu	Spermatogenesis	Spermatozoa	Spermatozoa	SRR652213	76SE	41602144	PMID: 23791531, GEO: GSM1069643	Spermatozoa, male, C57BL/6, 11 weeks
Mmu	Spermatogenesis	Spermatids	Spermatids	SRR652208	76SE	24295450	PMID: 23791531, GEO: GSM1069642	Spermatids, male, C57BL/6, 11 weeks
Mmu	Spermatogenesis	Spermatids	Spermatids	SRR652209	76SE	38510922	PMID: 23791531, GEO: GSM1069642	Spermatids, male, C57BL/6, 11 weeks
Mmu	Spermatogenesis	Spermatids	Spermatids	SRR652210	76SE	40215919	PMID: 23791531, GEO: GSM1069642	Spermatids, male, C57BL/6, 11 weeks
Mmu	Spermatogenesis	Spermatocytes	Spermatocytes	SRR652205	76SE	31950112	PMID: 23791531, GEO: GSM1069641	Spermatocytes, male, C57BL/6, 11 weeks
Mmu	Spermatogenesis	Spermatocytes	Spermatocytes	SRR652206	76SE	36632802	PMID: 23791531, GEO: GSM1069641	Spermatocytes, male, C57BL/6, 11 weeks
Mmu	Spermatogenesis	Spermatocytes	Spermatocytes	SRR652207	76SE	44526936	PMID: 23791531, GEO: GSM1069641	Spermatocytes, male, C57BL/6, 11 weeks
Mmu	Spermatogenesis	Spermatogonia	Spermatogonia	SRR652202	76SE	33308345	PMID: 23791531, GEO: GSM1069640	Spermatogonia, male, C57BL/6, 6 days
Mmu	Spermatogenesis	Spermatogonia	Spermatogonia	SRR652203	76SE	35742186	PMID: 23791531, GEO: GSM1069640	Spermatogonia, male, C57BL/6, 6 days
Mmu	Spermatogenesis	Spermatogonia	Spermatogonia	SRR652204	76SE	41435589	PMID: 23791531, GEO: GSM1069640	Spermatogonia, male, C57BL/6, 6 days
Mmu	Spermatogenesis	Sertoli_cells	Sertoli_cells	SRR652199	76SE	41430887	PMID: 23791531, GEO: GSM1069639	Sertoli cells, male, C57BL/6, 3 weeks
Mmu	Spermatogenesis	Sertoli_cells	Sertoli_cells	SRR652200	76SE	46563585	PMID: 23791531, GEO: GSM1069639	Sertoli cells, male, C57BL/6, 3 weeks
Mmu	Spermatogenesis	Sertoli_cells	Sertoli_cells	SRR652201	76SE	46780390	PMID: 23791531, GEO: GSM1069639	Sertoli cells, male, C57BL/6, 3 weeks
Mmu	Hematopoiesis	MSC	MSC	SRR1825654	101PE	10665886	PRJNA276964	bone marrow mesenchymal stem cells, 8 weeks, female, strain C67BL/6
Mmu	Hematopoiesis	MSC	MSC	SRR1825655	101PE	26590414	PRJNA276964	bone marrow mesenchymal stem cells, 8 weeks, female, strain C67BL/6
Mmu	Hematopoiesis	MSC	MSC	SRR1825642	101PE	23771460	PRJNA276964	bone marrow mesenchymal stem cells, 8 weeks, female, strain C67BL/6
Mmu	Hematopoiesis	MSC	MSC	SRR1825641	101PE	16040661	PRJNA276964	bone marrow mesenchymal stem cells, 8 weeks, female, strain C67BL/6
Mmu	Hematopoiesis	MSC	MSC	SRR4448546	51PE	32783056	GEO: GSM2359364	bone marrow-derived mesenchymal stem cells, control
Mmu	Hematopoiesis	MSC	MSC	SRR4448542	51PE	28718023	GEO: GSM2359360	bone marrow-derived mesenchymal stem cells, control
Mmu	Hematopoiesis	MSC	MSC	SRR4448538	51PE	29854350	GEO: GSM2359356	bone marrow-derived mesenchymal stem cells, control
Mmu	Hematopoiesis	MSC	MSC	SRR2982412	101PE	27415222	GEO: GSM1968343	BM-derived Mesenchymal stem/progenitor cells (MSPCs), passages 5-10, strain C57BL/6, WT
Mmu	Hematopoiesis	MSC	MSC	SRR2982411	101PE	27590374	GEO: GSM1968342	BM-derived Mesenchymal stem/progenitor cells (MSPCs), passages 5-10, strain C57BL/6, WT
Mmu	Hematopoiesis	BM_DM_a	BM_DM	SRR1634674	51SE	30841201	PMID: 25480297, GEO: GSM1533950	bone marrow derived macrophages, strainC 57BL6/J, no treatment
Mmu	Hematopoiesis	BM_DM_a	BM_DM	SRR1634708	51SE	30168373	PMID: 25480297, GEO: GSM1533914	bone marrow derived macrophages, strainC 57BL6/J, no treatment
Mmu	Hematopoiesis	BM_DM_a	BM_DM	SRR1514123	101PE	35712240	PRJNA194083	strain C57BL/6J
Mmu	Hematopoiesis	BM_DM_a	BM_DM	SRR1514122	101PE	36334479	PRJNA194083	strain C57BL/6J
Mmu	Hematopoiesis	BM_DM_a	BM_DM	SRR1514121	101PE	28835381	PRJNA194083	strain C57BL/6J
Mmu	Hematopoiesis	BM_DM_b	BM_DM	SRR3586229	50SE	31702795	PRJNA322711	bone marrow derived macrophages, untreated, strain C57BL/6, WT
Mmu	Hematopoiesis	BM_DM_b	BM_DM	SRR3586202	50SE	28973437	PRJNA322711	bone marrow derived macrophages, untreated, strain C57BL/6, WT
Mmu	Hematopoiesis	BM_DM_b	BM_DM	SRR3586201	50SE	30030302	PRJNA322711	bone marrow derived macrophages, untreated, strain C57BL/6, WT
Mmu	Hematopoiesis	BM_DM_b	BM_DM	SRR502948	50PE	95698697	GEO: GSM940701	Primary bone marrow-derived macrophages (BMDM). 7th day of differentiation, strain C57BL/6
Mmu	Hematopoiesis	BM_DM_b	BM_DM	SRR1999896	101PE	19088446	GEO: GSM1668318	BMDM_No Stimulus 2, from femur bone marrow, strain C57BL/6, WT
Mmu	Hematopoiesis	BM_DM_b	BM_DM	SRR1999895	101PE	17506765	GEO: GSM1668317	BMDM_No Stimulus 1, from femur bone marrow, strain C57BL/6, WT
Mmu	Hematopoiesis	HSC_a	HSC	SRR5272995	101PE	45938248	PRJNA375966	Bone marrow, HSC, female, strain C57BL/6
Mmu	Hematopoiesis	HSC_a	HSC	SRR5272994	101PE	54105983	PRJNA375966	Bone marrow, HSC, female, strain C57BL/6
Mmu	Hematopoiesis	HSC_a	HSC	SRR5272993	101PE	53600653	PRJNA375966	Bone marrow, HSC, female, strain C57BL/6
Mmu	Hematopoiesis	HSC_a	HSC	SRR3180533	51SE	37633508	PMID: 27117588, GEO: GSM2067696	haematopoietic stem and progenitor cell (HSC), strain C57BL/6J
Mmu	Hematopoiesis	HSC_a	HSC	SRR3180532	51SE	37180574	PMID: 27117588, GEO: GSM2067695	haematopoietic stem and progenitor cell (HSC), strain C57BL/6J
Mmu	Hematopoiesis	HSC_b	HSC	SRR1535691	51SE	74023302	PMID: 26477271, GEO: GSM1463448	HSC, strain C57BL/6
Mmu	Hematopoiesis	HSC_b	HSC	SRR1535692	51SE	79640067	PMID: 26477271, GEO: GSM1463449	HSC, strain C57BL/6
Mmu	Hematopoiesis	HSC_b	HSC	SRR1535693	51SE	65756976	PMID: 26477271, GEO: GSM1463450	HSC, strain C57BL/6
Mmu	Hematopoiesis	HSC_c	HSC	SRR3192579	75PE	97306522	GEO: GSM2072514	ENCODE biosample ENCBS740ZAY, primary HSC, male, 5-6 week, strain C57BL/6J, donor ENCDO072AAA
Mmu	Hematopoiesis	HSC_c	HSC	SRR3192578	75PE	166587096	GEO: GSM2072513	ENCODE biosample ENCBS740ZAY, primary HSC, male, 5-6 week, strain C57BL/6J, donor ENCDO072AAA
Mmu	Hematopoiesis	CMP_a	CMP	SRR5273012	101PE	56473738	PRJNA375966	Bone marrow, CMP, female, strain C57BL/6
Mmu	Hematopoiesis	CMP_a	CMP	SRR5273011	101PE	39951312	PRJNA375966	Bone marrow, CMP, female, strain C57BL/6
Mmu	Hematopoiesis	CMP_a	CMP	SRR5273010	101PE	52645361	PRJNA375966	Bone marrow, CMP, female, strain C57BL/6
Mmu	Hematopoiesis	CMP_a	CMP	SRR2079145	75PE	32570362	PMID: 27580035, GEO: GSM1721140	Bone marrow, CMP, strain C57BL/6
Mmu	Hematopoiesis	CMP_b	CMP	SRR3192652	75PE	111962046	GEO: GSM2072584	ENCODE biosample ENCBS608AAV, primary CMP, male, 5-6 week, strain C57BL/6J, donor ENCDO072AAA
Mmu	Hematopoiesis	CMP_b	CMP	SRR3192651	75PE	102721185	GEO: GSM2072583	ENCODE biosample ENCBS376WKD, primary CMP, male, 5-6 week, strain C57BL/6J, donor ENCDO072AAA
Mmu	Hematopoiesis	CMP_c	CMP	SRR2927369	100PE	43845665	PMID: 27397025, GEO: GSM1930227	CMP, 6-12 weeks, strain C57BL/6J, WT
Mmu	Hematopoiesis	CMP_c	CMP	SRR2927370	100PE	45338252	PMID: 27397025, GEO: GSM1930228	CMP, 6-12 weeks, strain C57BL/6J, WT
Mmu	Hematopoiesis	CMP_c	CMP	SRR2927371	100PE	36314776	PMID: 27397025, GEO: GSM1930229	CMP, 6-12 weeks, strain C57BL/6J, WT
Mmu	Hematopoiesis	CMP_c	CMP	SRR2927372	100PE	27053595	PMID: 27397025, GEO: GSM1930230	CMP, 6-12 weeks, strain C57BL/6J, WT
Mmu	Hematopoiesis	CMP_c	CMP	SRR2927373	100PE	35848196	PMID: 27397025, GEO: GSM1930231	CMP, 6-12 weeks, strain C57BL/6J, WT
Mmu	Hematopoiesis	CLP_a	CLP	SRR2031874	101PE	26787434	GEO: GSM1689646	common lymphoid progenitor, CD135+IL7R+ckit+Sca1+, 1000 cells
Mmu	Hematopoiesis	CLP_a	CLP	SRR3157474	100PE	43092746	PMID: 27811054, GEO: GSM2058006	Mouse Primary Bone Marrow Cells, female, strain C57BL/6J, Lin- Sca1lo cKitlo IL7Ra+ Flk2+
Mmu	Hematopoiesis	CLP_a	CLP	SRR3157473	100PE	36152597	PMID: 27811054, GEO: GSM2058005	Mouse Primary Bone Marrow Cells, female, strain C57BL/6J, Lin- Sca1lo cKitlo IL7Ra+ Flk2+
Mmu	Hematopoiesis	CLP_a	CLP	SRR3157472	100PE	36051025	PMID: 27811054, GEO: GSM2058004	Mouse Primary Bone Marrow Cells, female, strain C57BL/6J, Lin- Sca1lo cKitlo IL7Ra+ Flk2+
Mmu	Hematopoiesis	CLP_a	CLP	SRR3157471	100PE	33972164	PMID: 27811054, GEO: GSM2058003	Mouse Primary Bone Marrow Cells, female, strain C57BL/6J, Lin- Sca1lo cKitlo IL7Ra+ Flk2+
Mmu	Hematopoiesis	CLP_b	CLP	SRR3152878	50SE	29259961	PMID: 27156451, GEO: GSM2056364	Common lymphoid progenitor cells from bone marrow, cultured ex vivo, strain C57BL/6, CD25-Cd127+Sca1+Flt3+
Mmu	Hematopoiesis	CLP_b	CLP	SRR3152879	50SE	51594109	PMID: 27156451, GEO: GSM2056365	Common lymphoid progenitor cells from bone marrow, cultured ex vivo, strain C57BL/6, CD25-Cd127+Sca1+Flt3+
Mmu	Hematopoiesis	CLP_b	CLP	SRR1536385	57SE	4681349	PMID: 25103404, GEO: GSM1464971	Common Lymphoid Progenitor, Lin-, ckit+, Flk2+, Il7R+, strain C57BL/6
Mmu	Hematopoiesis	CLP_b	CLP	ERR674977	70PE	22072005	PRJEB7754	common lymphoid progenitor, 4 to 6 week, strain C57BL/6J, Lin-, CD127+, Sca1 medium, c-Kit+
Mmu	Hematopoiesis	CLP_b	CLP	SRR1373358	100PE	12573030	PMID: 27882944, GEO: GSM1409188	common lymphoid progenitor cells, strain C57BL/6, WT, Lin-c-kit+sca-1+Il-7Ra+ cells
Mmu	Hematopoiesis	GMP_a	GMP	SRR3192676	75PE	122112996	GEO: GSM2072596	ENCODE biosample ENCBS917EVE, GMP, 5-6 week, primary, male, donor ENCDO072AAA
Mmu	Hematopoiesis	GMP_a	GMP	SRR3192675	75PE	113019439	GEO: GSM2072595	ENCODE biosample ENCBS883TUU, GMP, 5-6 week, primary, male, donor ENCDO072AAA
Mmu	Hematopoiesis	GMP_b	GMP	SRR5272999	101PE	60030271	PRJNA375966	Bone marrow, GMP, female, strain C57BL/6
Mmu	Hematopoiesis	GMP_b	GMP	SRR5273000	101PE	54106526	PRJNA375966	Bone marrow, GMP, female, strain C57BL/6
Mmu	Hematopoiesis	GMP_b	GMP	SRR5272998	101PE	46906923	PRJNA375966	Bone marrow, GMP, female, strain C57BL/6
Mmu	Hematopoiesis	GMP_b	GMP	SRR2079146	75PE	28757589	PMID: 27580035,, GEO: GSM1721141	Bone marrow, GMP, strain C57BL/6
Mmu	Hematopoiesis	GMP_b	GMP	ERR674985	70PE	28504761	PRJEB7754	granulocyte monocyte progenitor cell, 4-6 week, strain C57BL/6J, Lin-, CD127-, Sca1-, c-Kit+, CD16/32 high, CD34+
Mmu	Hematopoiesis	MEP_a	MEP	SRR3192624	75PE	165368955	GEO: GSM2072553	ENCODE biosample ENCBS730RBL, MEP, 5-6 week, primary, male, donor ENCDO072AAA
Mmu	Hematopoiesis	MEP_a	MEP	SRR3192625	75PE	95521267	GEO: GSM2072554	ENCODE biosample ENCBS097BDW, MEP, 5-6 week, primary, male, donor ENCDO072AAA
Mmu	Hematopoiesis	MEP_b	MEP	SRR5272980	101PE	46246411	PRJNA375966	Bone marrow, MEP, female, strain C57BL/6
Mmu	Hematopoiesis	MEP_b	MEP	SRR5272979	101PE	45434037	PRJNA375966	Bone marrow, MEP, female, strain C57BL/6
Mmu	Hematopoiesis	MEP_b	MEP	SRR5272978	101PE	45308862	PRJNA375966	Bone marrow, MEP, female, strain C57BL/6
Mmu	Hematopoiesis	MEP_b	MEP	SRR3479226	51SE	12278096	PMID: 27076172, GEO: GSM2144274	MEP, Runx1 wt/wt
Mmu	Hematopoiesis	MEP_b	MEP	SRR3479225	51SE	12226948	PMID: 27076172, GEO: GSM2144274	MEP, Runx1 wt/wt
Mmu	Hematopoiesis	MEP_b	MEP	SRR3479224	51SE	12158933	PMID: 27076172, GEO: GSM2144274	MEP, Runx1 wt/wt
Mmu	Hematopoiesis	MEP_b	MEP	SRR3479223	51SE	12100112	PMID: 27076172, GEO: GSM2144274	MEP, Runx1 wt/wt
Mmu	Hematopoiesis	MEP_b	MEP	SRR3479222	51SE	9906619	PMID: 27076172, GEO: GSM2144273	MEP, Runx1 wt/wt
Mmu	Hematopoiesis	MEP_b	MEP	SRR3479221	51SE	9852602	PMID: 27076172, GEO: GSM2144273	MEP, Runx1 wt/wt
Mmu	Hematopoiesis	MEP_b	MEP	SRR3479220	51SE	9797071	PMID: 27076172, GEO: GSM2144273	MEP, Runx1 wt/wt
Mmu	Hematopoiesis	MEP_b	MEP	SRR3479219	51SE	9753678	PMID: 27076172, GEO: GSM2144273	MEP, Runx1 wt/wt
Mmu	Hematopoiesis	MDP_a	MDP	SRR5272983	101PE	59654029	PRJNA375966	Bone marrow, MDP, female, strain C57BL/6
Mmu	Hematopoiesis	MDP_a	MDP	SRR5272982	101PE	59675049	PRJNA375966	Bone marrow, MDP, female, strain C57BL/6
Mmu	Hematopoiesis	MDP_a	MDP	SRR5272981	101PE	49446656	PRJNA375966	Bone marrow, MDP, female, strain C57BL/6
Mmu	Hematopoiesis	MDP_b	MDP	SRR1629218	50SE	15353434	PMID: 25453760, GEO: GSM1531791	MDP cells from bone marrow, strain C57BL/8, Lin-, Flk2 high, c-kit high
Mmu	Hematopoiesis	Monocytes_ab	Monocytes	SRR2047009	76SE	42265772	GEO: GSM1701340	Monocytes, healthy, WT, unstimulated, WT NOD2 + WT ATG16L1
Mmu	Hematopoiesis	Monocytes_ab	Monocytes	SRR2047008	76SE	51323488	GEO: GSM1701339	Monocytes, healthy, WT, unstimulated, WT NOD2 + WT ATG16L1
Mmu	Hematopoiesis	Monocytes_ab	Monocytes	ERR674981	70PE	27441897	PRJEB7754	Monocytes, 4-6 week, strain C57BL/6J, Gr1 medium, Mac1+, CFMS+, CD3-, CD4-, CD8-, IgM-, Ter119-
Mmu	Hematopoiesis	Monocytes_c	Monocytes	SRR847284	100PE	84996323	PMID: 24147027, GEO: GSM1134054	Bone marrow monocytes, 6 week, female, strain C57BL/6
Mmu	Hematopoiesis	Monocytes_c	Monocytes	SRR847283	100PE	98813779	PMID: 24147027, GEO: GSM1134053	Bone marrow monocytes, 6 week, female, strain C57BL/6
Mmu	Hematopoiesis	Monocytes_c	Monocytes	SRR847282	100PE	79120064	PMID: 24147027, GEO: GSM1134052	Bone marrow monocytes, 6 week, female, strain C57BL/6
Mmu	Hematopoiesis	Erythroblasts_a	Erythroblasts	SRR4422111	75PE	204160404	GEO: GSM2343993	ENCODE biosample ENCBS666WMI, erythroblast, male, 5-6 week, strain C57BL/6J, donor ENCDO072AAA
Mmu	Hematopoiesis	Erythroblasts_b	Erythroblasts	SRR4422110	75PE	181392089	GEO: GSM2343992	ENCODE biosample ENCBS129OMN, erythroblast, male, 5-6 week, strain C57BL/6J, donor ENCDO072AAA

## Sheet: Co-regulation network analysis
Human_sample	Human_subgroup	Total_reads_human		Mouse_sample	Mouse_subgroup	Total_reads_mouse		Chicken_sample	Chicken_subgroup	Total_reads_chicken
ESC_H1_a	ESC	112504744		ESC_CGR8	ESC	234225906		Embr_StageX_a	StageX	243348227
ESC_H1_b	ESC	386503533		ESC_D3	ESC	62345902		Embr_StageX_b	StageX	222514094
ESC_H1_c	ESC	202255240		ESC_E14	ESC	464596307		Embr_StageX_c	StageX	233295870
ESC_H1_d	ESC	211806326		ESC_J1	ESC	43040267		Whole_Brain	Brain	232098975
iPS_a	iPS	356027112		ESC_OS25_TT2	ESC	119715160		Brain_Fem	Brain	337087401
iPS_b	iPS	223517149		ESC_v65	ESC	58065395		Brain_Male	Brain	285905126
Whole_Brain_b	Brain	114809385		iPS_a	iPS	51343868		Telencephalon	Brain	300683013
Cortex	Brain	498534801		iPS_b	iPS	47314841		Cerebellum	Cerebellum	45611019
Frontal_Gyrus_young	Brain	194915013		Whole_Brain_a	Brain	334203340		Heart_a	Heart	217359076
Frontal_Gyrus_old	Brain	94764545		Whole_Brain_b	Brain	206088957		Heart_Fem	Heart	63822836
Sup_Temporal_Gyrus	Brain	186239445		Cortex_a	Brain	122763681		Heart_Male	Heart	60156103
Cerebellum_a	Cerebellum	193627224		Cortex_b	Brain	189421151		Muscle_a	Muscle	194036742
Cerebellum_c	Cerebellum	214316977		Frontal_Lobe	Brain	185745131		Muscle_Fem	Muscle	83027345
Heart_a	Heart	239907914		Cerebellum_a	Cerebellum	241973575		Muscle_Male	Muscle	70324600
Heart_b	Heart	240038973		Cerebellum_b	Cerebellum	170930884		Testis_a	Testis	182942162
Heart_c	Heart	264208815		Cerebellum_c	Cerebellum	295679842		Testis_b	Testis	276583909
Muscle_b	Muscle	285315565		Heart_a	Heart	227602900		Ovarium	Ovarium	307595488
Muscle_d	Muscle	146803299		Heart_b	Heart	155581190		Colon	Colon	100719994
Muscle_e	Muscle	261594767		Heart_c	Heart	210962897		AbdominalFat	Adipose	335744989
Testis_a	Testis	245647481		Heart_d	Heart	250893600		Kidney_a	Kidney	231725342
Testis_b	Testis	175255634		Muscle_a	Muscle	130832927		Kidney_Fem	Kidney	155731074
Testis_c	Testis	246794636		Muscle_b	Muscle	230283014		Kidney_Male	Kidney	74513824
Ovary_a	Ovary	80946260		Muscle_c	Muscle	216765128		Liver_a	Liver	231621142
Ovary_b	Ovary	215920579		Testis_a	Testis	225725085		Liver_Fem	Liver	55229488
Placenta_a	Placenta	149584520		Testis_b	Testis	200500316		Liver_Male	Liver	49742180
Placenta_b	Placenta	257417568		Testis_c	Testis	296377657		Lung_a	Lung	91606960
Placenta_c	Placenta	315726588		Ovary_a	Ovary	102686897		Lung_Fem	Lung	45553267
Skin	Epithelial	212833202		Ovary_b	Ovary	228130400		Lung_Male	Lung	51876771
Placenta_Epith	Epithelial	314765710		Placenta_a	Placenta	237925260		Spleen_a	Spleen	113458402
Stomach_a	Stomach	235634132		Placenta_c	Placenta	233233461		Spleen_Fem	Spleen	68516511
Stomach_b	Stomach	175525107		Placenta_d	Placenta	175794054		Spleen_Male	Spleen	65152223
Colon_b	Colon	98589057		Skin_a	Epithelial	193707231		CL_DT40_a	CL_Immune	113629398
Colon_sigmoid	Colon	260803635		Skin_b	Epithelial	171846157		CL_DT40_b	CL_Immune	130016897
Colon_transverse	Colon	227621418		Skin_c	Epithelial	280237289
Adipose_b	Adipose	255709311		Stomach_a	Stomach	168550565
Adipose_c	Adipose	248109729		Stomach_b	Stomach	210502235
Adipose_d	Adipose	83995427		Stomach_c	Stomach	95420720
Adrenal_b	Adrenal	116645872		Colon_a	Colon	320269578
Adrenal_c	Adrenal	98328571		Colon_b	Colon	228229300
Kidney_b	Kidney	207540658		Colon_c	Colon	290066311
Kidney_c	Kidney	194298083		FatPad_a	Adipose	305133866
Kidney_d	Kidney	172860550		FatPad_b	Adipose	157167144
Liver_a	Liver	276227731		White_Adipose	Adipose	192008072
Liver_b	Liver	276743924		Adrenal_a	Adrenal	148292125
Liver_c	Liver	140125066		Adrenal_b	Adrenal	59015350
Lung_b	Lung	150327194		Adrenal_c	Adrenal	268414185
Lung_e	Lung	290833917		Kidney_a	Kidney	351672911
Lung_f	Lung	198118421		Kidney_b	Kidney	238159976
Prostate_b	Prostate	139027062		Kidney_c	Kidney	246104363
Prostate_c	Prostate	143540660		Liver_a	Liver	331673931
Prostate_d	Prostate	378683004		Liver_b	Liver	250338199
Thyroid_b	Thyroid	200331024		Liver_c	Liver	161694833
Thyroid_c	Thyroid	168170475		Lung_a	Lung	195429060
Thyroid_d	Thyroid	184514042		Lung_c	Lung	287194980
Spleen_a	Spleen	225173985		Lung_d	Lung	181581588
Spleen_b	Spleen	148822459		Prostate_a	Prostate	215001891
Thymus_a	Thymus	77782008		Prostate_b	Prostate	71486696
Thymus_b	Thymus	206227422		Thyroid_a	Thyroid	176379627
Lymph_node_b	Lymph_Node	206871448		Thyroid_b	Thyroid	194145242
Lymph_node_c	Lymph_Node	207032635		Spleen_a	Spleen	211892378
CL_Gm12878	CL_Immune	212225782		Spleen_b	Spleen	342207412
CL_K562	CL_Immune	219833510		Spleen_c	Spleen	203783763
				Thymus_a	Thymus	181576971
				Thymus_b	Thymus	344477409
				Thymus_c	Thymus	354433309
				Lymph_node_a	Lymph_Node	169024043
				Lymph_node_b	Lymph_Node	83671640
				CL_MEL	CL_Immune	250259280
				CL_CH12	CL_Immune	279271583

## Sheet: VAST-TOOLS benchmarking
Fastq_name	SRA_ID	Length	Read_number	Source	Info	Species
GM19238_SRSF_KD_a1	SRR1040828	107SE	67109707	GEO: GSM1276855	lymphoblastoid cell line GM19238, KD SRSF3, 12_B	Hsa
GM19238_SRSF_KD_a2	SRR1040829	107SE	41920370	GEO: GSM1276856	lymphoblastoid cell line GM19238, KD SRSF3, 12_C	Hsa
GM19238_SRSF_KD_a3	SRR1040830	107SE	79266700	GEO: GSM1276857	lymphoblastoid cell line GM19238, KD SRSF3, 12_SFRS3_A	Hsa
GM19238_CONTROL_a1	SRR1040881	107SE	59899088	GEO: GSM1276908	lymphoblastoid cell line GM19238, NS#2_A	Hsa
GM19238_CONTROL_a2	SRR1040883	107SE	70068818	GEO: GSM1276910	lymphoblastoid cell line GM19238, NS#3_B	Hsa
GM19238_CONTROL_a3	SRR1040884	107SE	62078946	GEO: GSM1276911	lymphoblastoid cell line GM19238, NS#4_A	Hsa
Cerebellum_CT34	SRR1158547	101PE	32948186	PMID: 25349387	Cer_CT34	Mmu
Cerebellum_CT40	SRR1158548	101PE	52425582	PMID: 25349387	Cer_CT40	Mmu
Cerebellum_CT52	SRR1158550	101PE	26942112	PMID: 25349387	Cer_CT52	Mmu
Liver_CT34	SRR1158579	101PE	33162510	PMID: 25349387	Liv_CT34	Mmu
Liver_CT40	SRR1158580	101PE	45864855	PMID: 25349387	Liv_CT40	Mmu
Liver_CT52	SRR1158582	101PE	38299046	PMID: 25349387	Liv_CT52	Mmu
CL_MB231_ESRP_Cont	SRR436886	76SE	120901583	PMID: 22354987	ESRP control (MDA-MB-231 celline)	Hsa
CL_MB231_ESRP_OV	SRR436885	76SE	136249697	PMID: 22354987	ESRP overexpression (MDA-MB-231 celline)	Hsa
ESC_DIVm8	SRR645824	50PE	28858587	PMID: 24358889	Embryonic stem cells (DIV-8)	Mmu
	SRR645826	50PE	30703921	PMID: 24358889	Embryonic stem cells (DIV-8)	Mmu
	SRR645828	50PE	30429743	PMID: 24358889	Embryonic stem cells (DIV-8)	Mmu
	SRR645830	50PE	30610255	PMID: 24358889	Embryonic stem cells (DIV-8)	Mmu
Neurons_DIV28	SRR645872	50PE	29865150	PMID: 24358889	Stage IV/V neurons (DIV28)	Mmu
	SRR645875	50PE	31166866	PMID: 24358889	Stage IV/V neurons (DIV28)	Mmu
	SRR645877	50PE	28047483	PMID: 24358889	Stage IV/V neurons (DIV28)	Mmu
	SRR645879	50PE	31403393	PMID: 24358889	Stage IV/V neurons (DIV28)	Mmu

## Sheet: Single cell analysis
Sample_Name	SRA_ID	Sample_group	Length	Read_number	Source	Info	Species
Embr_8C_a1_1	SRR490973	Human 8-cell embryos	100SE	31911442	PMID: 23934149 GEO: GSM922158	8-cell embryo #1 - Cell #1	Hsa
Embr_8C_a1_2	SRR490974	Human 8-cell embryos	100SE	30282390	PMID: 23934149 GEO: GSM922159	8-cell embryo #1 - Cell #2	Hsa
Embr_8C_a1_3	SRR490975	Human 8-cell embryos	100SE	33565816	PMID: 23934149 GEO: GSM922160	8-cell embryo #1 - Cell #3	Hsa
Embr_8C_a1_4	SRR490976	Human 8-cell embryos	100SE	33261944	PMID: 23934149 GEO: GSM922161	8-cell embryo #1 - Cell #4	Hsa
Embr_8C_a2_1	SRR490977	Human 8-cell embryos	100SE	27602538	PMID: 23934149 GEO: GSM922162	8-cell embryo #2 - Cell #1	Hsa
Embr_8C_a2_2	SRR490978	Human 8-cell embryos	100SE	32482770	PMID: 23934149 GEO: GSM922163	8-cell embryo #2 - Cell #2	Hsa
Embr_8C_a2_3	SRR490979	Human 8-cell embryos	100SE	28271452	PMID: 23934149 GEO: GSM922164	8-cell embryo #2 - Cell #3	Hsa
Embr_8C_a2_4	SRR490980	Human 8-cell embryos	100SE	31915232	PMID: 23934149 GEO: GSM922165	8-cell embryo #2 - Cell #4	Hsa
Embr_8C_a2_5	SRR490981	Human 8-cell embryos	100SE	34098900	PMID: 23934149 GEO: GSM922166	8-cell embryo #2 - Cell #5	Hsa
Embr_8C_a2_6	SRR490982	Human 8-cell embryos	100SE	32376268	PMID: 23934149 GEO: GSM922167	8-cell embryo #2 - Cell #6	Hsa
Embr_8C_a2_7	SRR490983	Human 8-cell embryos	100SE	19792800	PMID: 23934149 GEO: GSM922168	8-cell embryo #2 - Cell #7	Hsa
Embr_8C_a2_8	SRR490984	Human 8-cell embryos	100SE	22364554	PMID: 23934149 GEO: GSM922169	8-cell embryo #2 - Cell #8	Hsa
Embr_8C_a3_1	SRR490985	Human 8-cell embryos	100SE	47990468	PMID: 23934149 GEO: GSM922170	8-cell embryo #3 - Cell #1	Hsa
Embr_8C_a3_2	SRR490986	Human 8-cell embryos	100SE	42243898	PMID: 23934149 GEO: GSM922171	8-cell embryo #3 - Cell #2	Hsa
Embr_8C_a3_3	SRR490987	Human 8-cell embryos	100SE	36089791	PMID: 23934149 GEO: GSM922172	8-cell embryo #3 - Cell #3	Hsa
Embr_8C_a3_4	SRR490988	Human 8-cell embryos	100SE	48887034	PMID: 23934149 GEO: GSM922173	8-cell embryo #3 - Cell #4	Hsa
Embr_8C_a3_5	SRR490989	Human 8-cell embryos	100SE	42851497	PMID: 23934149 GEO: GSM922174	8-cell embryo #3 - Cell #5	Hsa
Embr_8C_a3_6	SRR490990	Human 8-cell embryos	100SE	47500857	PMID: 23934149 GEO: GSM922175	8-cell embryo #3 - Cell #6	Hsa
Embr_8C_a3_7	SRR490991	Human 8-cell embryos	100SE	33545010	PMID: 23934149 GEO: GSM922176	8-cell embryo #3 - Cell #7	Hsa
Embr_8C_a3_8	SRR490992	Human 8-cell embryos	100SE	43263115	PMID: 23934149 GEO: GSM922177	8-cell embryo #3 - Cell #8	Hsa
ESC_pass10_a1	SRR491065	hESCs (passage 10)	100SE	42010797	PMID: 23934149 GEO: GSM922250	hESC passage #10 - Cell #1	Hsa
ESC_pass10_a2	SRR491066	hESCs (passage 10)	100SE	42110391	PMID: 23934149 GEO: GSM922251	hESC passage #10 - Cell #2	Hsa
ESC_pass10_a3	SRR491067	hESCs (passage 10)	100SE	34817667	PMID: 23934149 GEO: GSM922252	hESC passage #10 - Cell #3	Hsa
ESC_pass10_a4	SRR491068	hESCs (passage 10)	100SE	34687119	PMID: 23934149 GEO: GSM922253	hESC passage #10 - Cell #4	Hsa
ESC_pass10_a5	SRR491069	hESCs (passage 10)	100SE	35782052	PMID: 23934149 GEO: GSM922254	hESC passage #10 - Cell #5	Hsa
ESC_pass10_a6	SRR491070	hESCs (passage 10)	100SE	33066571	PMID: 23934149 GEO: GSM922258	hESC passage #10 - Cell #6	Hsa
ESC_pass10_a9	SRR491073	hESCs (passage 10)	100SE	32280516	PMID: 23934149 GEO: GSM922250	hESC passage #10 - Cell #9	Hsa
ESC_pass10_a10	SRR491074	hESCs (passage 10)	100SE	33945612	PMID: 23934149 GEO: GSM922259	hESC passage #10 - Cell #10	Hsa
ESC_pass10_a11	SRR491075	hESCs (passage 10)	100SE	38820522	PMID: 23934149 GEO: GSM922260	hESC passage #10 - Cell #11	Hsa
ESC_pass10_a12	SRR491076	hESCs (passage 10)	100SE	33715762	PMID: 23934149 GEO: GSM922261	hESC passage #10 - Cell #12	Hsa
ESC_pass10_a13	SRR491077	hESCs (passage 10)	100SE	31140174	PMID: 23934149 GEO: GSM922262	hESC passage #10 - Cell #13	Hsa
ESC_pass10_a16	SRR491080	hESCs (passage 10)	100SE	35226222	PMID: 23934149 GEO: GSM922265	hESC passage #10 - Cel l#16	Hsa
ESC_pass10_a17	SRR491081	hESCs (passage 10)	100SE	30482645	PMID: 23934149 GEO: GSM922266	hESC passage #10 - Cell #17	Hsa
ESC_pass10_a18	SRR491082	hESCs (passage 10)	100SE	37418616	PMID: 23934149 GEO: GSM922267	hESC passage #10 - Cell #18	Hsa
ESC_pass10_a19	SRR491083	hESCs (passage 10)	100SE	36795118	PMID: 23934149 GEO: GSM922268	hESC passage #10 - Cell #19	Hsa
ESC_pass10_a20	SRR491084	hESCs (passage 10)	100SE	29116428	PMID: 23934149 GEO: GSM922269	hESC passage #10 - Cell #20	Hsa
ESC_pass10_a21	SRR491085	hESCs (passage 10)	100SE	30718135	PMID: 23934149 GEO: GSM922270	hESC passage #10 - Cell #21	Hsa
ESC_pass10_a23	SRR491087	hESCs (passage 10)	100SE	34622909	PMID: 23934149 GEO: GSM922272	hESC passage #10 - Cell #23	Hsa
ESC_pass10_a24	SRR491088	hESCs (passage 10)	100SE	31428586	PMID: 23934149 GEO: GSM922273	hESC passage #10 - Cell #24	Hsa
ESC_pass10_a25	SRR491089	hESCs (passage 10)	100SE	31442433	PMID: 23934149 GEO: GSM922274	hESC passage #10 - Cell #25	Hsa
LC_PT_45_SC02	SRR2049397	Lung cancer	101PE	8837457	PMID: 26084335 GEO: GSM1702645	PDX, LC-PT-45_SC02	Hsa
LC_PT_45_SC05	SRR2049399	Lung cancer	101PE	9401040	PMID: 26084335 GEO: GSM1702647	PDX, LC-PT-45_SC05	Hsa
LC_PT_45_SC10	SRR2049402	Lung cancer	101PE	9688190	PMID: 26084335 GEO: GSM1702650	PDX, LC-PT-45_SC10	Hsa
LC_PT_45_SC23	SRR2049406	Lung cancer	101PE	10904028	PMID: 26084335 GEO: GSM1702654	PDX, LC-PT-45_SC23	Hsa
LC_PT_45_SC28	SRR2049407	Lung cancer	101PE	10899923	PMID: 26084335 GEO: GSM1702655	PDX, LC-PT-45_SC28	Hsa
LC_PT_45_SC30	SRR2049408	Lung cancer	101PE	10509883	PMID: 26084335 GEO: GSM1702656	PDX, LC-PT-45_SC30	Hsa
LC_PT_45_SC34	SRR2049409	Lung cancer	101PE	9784483	PMID: 26084335 GEO: GSM1702657	PDX, LC-PT-45_SC34	Hsa
LC_PT_45_SC35	SRR2049410	Lung cancer	101PE	11339856	PMID: 26084335 GEO: GSM1702658	PDX, LC-PT-45_SC35	Hsa
LC_PT_45_SC49	SRR2049412	Lung cancer	101PE	12555090	PMID: 26084335 GEO: GSM1702660	PDX, LC-PT-45_SC49	Hsa
LC_PT_45_SC50	SRR2049413	Lung cancer	101PE	13343689	PMID: 26084335 GEO: GSM1702661	PDX, LC-PT-45_SC50	Hsa
LC_PT_45_SC53	SRR2049414	Lung cancer	101PE	14056026	PMID: 26084335 GEO: GSM1702662	PDX, LC-PT-45_SC53	Hsa
LC_PT_45_SC54	SRR2049415	Lung cancer	101PE	10315257	PMID: 26084335 GEO: GSM1702663	PDX, LC-PT-45_SC54	Hsa
LC_PT_45_SC61	SRR2049417	Lung cancer	101PE	11566793	PMID: 26084335 GEO: GSM1702665	PDX, LC-PT-45_SC61	Hsa
LC_PT_45_SC67	SRR2049419	Lung cancer	101PE	10596136	PMID: 26084335 GEO: GSM1702667	PDX, LC-PT-45_SC67	Hsa
LC_PT_45_SC72	SRR2049420	Lung cancer	101PE	13553994	PMID: 26084335 GEO: GSM1702668	PDX, LC-PT-45_SC72	Hsa
LC_PT_45_SC76	SRR2049421	Lung cancer	101PE	12050490	PMID: 26084335 GEO: GSM1702669	PDX, LC-PT-45_SC76	Hsa
LC_PT_45_SC77	SRR2049422	Lung cancer	101PE	9608918	PMID: 26084335 GEO: GSM1702670	PDX, LC-PT-45_SC77	Hsa
LC_PT_45_SC79	SRR2049423	Lung cancer	101PE	11379479	PMID: 26084335 GEO: GSM1702671	PDX, LC-PT-45_SC79	Hsa
LC_PT_45_SC94	SRR2049428	Lung cancer	101PE	12621562	PMID: 26084335 GEO: GSM1702676	PDX, LC-PT-45_SC94	Hsa
LC_PT_45_SC95	SRR2049429	Lung cancer	101PE	15295276	PMID: 26084335 GEO: GSM1702677	PDX, LC-PT-45_SC95	Hsa
BMDC_SC1_1	SRR578548	BMDCs	101PE	7065766	PMID: 23685454 GEO: GSM1012777	Bone Marrow-derived Dendritic Cell (BMDC), C57BL/6, 4h LPS stimulation, Single cell S1	Mmu
BMDC_SC1_2	SRR578549	BMDCs	101PE	7081581	PMID: 23685454 GEO: GSM1012777	Bone Marrow-derived Dendritic Cell (BMDC), C57BL/6, 4h LPS stimulation, Single cell S1	Mmu
BMDC_SC1_3	SRR578550	BMDCs	101PE	7178701	PMID: 23685454 GEO: GSM1012777	Bone Marrow-derived Dendritic Cell (BMDC), C57BL/6, 4h LPS stimulation, Single cell S1	Mmu
BMDC_SC2_1	SRR578551	BMDCs	101PE	8762922	PMID: 23685454 GEO: GSM1012778	Bone Marrow-derived Dendritic Cell (BMDC), C57BL/6, 4h LPS stimulation, Single cell S2	Mmu
BMDC_SC2_2	SRR578552	BMDCs	101PE	9362647	PMID: 23685454 GEO: GSM1012778	Bone Marrow-derived Dendritic Cell (BMDC), C57BL/6, 4h LPS stimulation, Single cell S2	Mmu
BMDC_SC2_3	SRR578553	BMDCs	101PE	9308442	PMID: 23685454 GEO: GSM1012778	Bone Marrow-derived Dendritic Cell (BMDC), C57BL/6, 4h LPS stimulation, Single cell S2	Mmu
BMDC_SC3_1	SRR578554	BMDCs	101PE	9619357	PMID: 23685454 GEO: GSM1012779	Bone Marrow-derived Dendritic Cell (BMDC), C57BL/6, 4h LPS stimulation, Single cell S3	Mmu
BMDC_SC3_2	SRR578555	BMDCs	101PE	10828269	PMID: 23685454 GEO: GSM1012779	Bone Marrow-derived Dendritic Cell (BMDC), C57BL/6, 4h LPS stimulation, Single cell S3	Mmu
BMDC_SC3_3	SRR578556	BMDCs	101PE	10694765	PMID: 23685454 GEO: GSM1012779	Bone Marrow-derived Dendritic Cell (BMDC), C57BL/6, 4h LPS stimulation, Single cell S3	Mmu
BMDC_SC4_1	SRR578557	BMDCs	101PE	8035212	PMID: 23685454 GEO: GSM1012780	Bone Marrow-derived Dendritic Cell (BMDC), C57BL/6, 4h LPS stimulation, Single cell S4	Mmu
BMDC_SC4_2	SRR578558	BMDCs	101PE	9144992	PMID: 23685454 GEO: GSM1012780	Bone Marrow-derived Dendritic Cell (BMDC), C57BL/6, 4h LPS stimulation, Single cell S4	Mmu
BMDC_SC4_3	SRR578559	BMDCs	101PE	9051648	PMID: 23685454 GEO: GSM1012780	Bone Marrow-derived Dendritic Cell (BMDC), C57BL/6, 4h LPS stimulation, Single cell S4	Mmu
BMDC_SC5_1	SRR578560	BMDCs	101PE	9166757	PMID: 23685454 GEO: GSM1012781	Bone Marrow-derived Dendritic Cell (BMDC), C57BL/6, 4h LPS stimulation, Single cell S5	Mmu
BMDC_SC5_2	SRR578561	BMDCs	101PE	10452514	PMID: 23685454 GEO: GSM1012781	Bone Marrow-derived Dendritic Cell (BMDC), C57BL/6, 4h LPS stimulation, Single cell S5	Mmu
BMDC_SC5_3	SRR578562	BMDCs	101PE	10357943	PMID: 23685454 GEO: GSM1012781	Bone Marrow-derived Dendritic Cell (BMDC), C57BL/6, 4h LPS stimulation, Single cell S5	Mmu
BMDC_SC6_1	SRR578563	BMDCs	101PE	7813112	PMID: 23685454 GEO: GSM1012782	Bone Marrow-derived Dendritic Cell (BMDC), C57BL/6, 4h LPS stimulation, Single cell S6	Mmu
BMDC_SC6_2	SRR578564	BMDCs	101PE	8174530	PMID: 23685454 GEO: GSM1012782	Bone Marrow-derived Dendritic Cell (BMDC), C57BL/6, 4h LPS stimulation, Single cell S6	Mmu
BMDC_SC6_3	SRR578565	BMDCs	101PE	8160745	PMID: 23685454 GEO: GSM1012782	Bone Marrow-derived Dendritic Cell (BMDC), C57BL/6, 4h LPS stimulation, Single cell S6	Mmu
BMDC_SC7_1	SRR578566	BMDCs	101PE	8119591	PMID: 23685454 GEO: GSM1012783	Bone Marrow-derived Dendritic Cell (BMDC), C57BL/6, 4h LPS stimulation, Single cell S7	Mmu
BMDC_SC7_2	SRR578567	BMDCs	101PE	7920275	PMID: 23685454 GEO: GSM1012783	Bone Marrow-derived Dendritic Cell (BMDC), C57BL/6, 4h LPS stimulation, Single cell S7	Mmu
BMDC_SC7_3	SRR578568	BMDCs	101PE	8038250	PMID: 23685454 GEO: GSM1012783	Bone Marrow-derived Dendritic Cell (BMDC), C57BL/6, 4h LPS stimulation, Single cell S7	Mmu
BMDC_SC8_1	SRR578569	BMDCs	101PE	7946851	PMID: 23685454 GEO: GSM1012784	Bone Marrow-derived Dendritic Cell (BMDC), C57BL/6, 4h LPS stimulation, Single cell S8	Mmu
BMDC_SC8_2	SRR578570	BMDCs	101PE	8574470	PMID: 23685454 GEO: GSM1012784	Bone Marrow-derived Dendritic Cell (BMDC), C57BL/6, 4h LPS stimulation, Single cell S8	Mmu
BMDC_SC8_3	SRR578571	BMDCs	101PE	8510805	PMID: 23685454 GEO: GSM1012784	Bone Marrow-derived Dendritic Cell (BMDC), C57BL/6, 4h LPS stimulation, Single cell S8	Mmu
BMDC_SC9_1	SRR578572	BMDCs	101PE	7252243	PMID: 23685454 GEO: GSM1012785	Bone Marrow-derived Dendritic Cell (BMDC), C57BL/6, 4h LPS stimulation, Single cell S9	Mmu
BMDC_SC9_2	SRR578573	BMDCs	101PE	7515278	PMID: 23685454 GEO: GSM1012785	Bone Marrow-derived Dendritic Cell (BMDC), C57BL/6, 4h LPS stimulation, Single cell S9	Mmu
BMDC_SC9_3	SRR578574	BMDCs	101PE	7490161	PMID: 23685454 GEO: GSM1012785	Bone Marrow-derived Dendritic Cell (BMDC), C57BL/6, 4h LPS stimulation, Single cell S9	Mmu
BMDC_SC10_1	SRR578575	BMDCs	101PE	9421315	PMID: 23685454 GEO: GSM1012786	Bone Marrow-derived Dendritic Cell (BMDC), C57BL/6, 4h LPS stimulation, Single cell S10	Mmu
BMDC_SC10_2	SRR578576	BMDCs	101PE	10041330	PMID: 23685454 GEO: GSM1012786	Bone Marrow-derived Dendritic Cell (BMDC), C57BL/6, 4h LPS stimulation, Single cell S10	Mmu
BMDC_SC10_3	SRR578577	BMDCs	101PE	9973644	PMID: 23685454 GEO: GSM1012786	Bone Marrow-derived Dendritic Cell (BMDC), C57BL/6, 4h LPS stimulation, Single cell S10	Mmu
BMDC_SC11_1	SRR578578	BMDCs	101PE	9672123	PMID: 23685454 GEO: GSM1012787	Bone Marrow-derived Dendritic Cell (BMDC), C57BL/6, 4h LPS stimulation, Single cell S11	Mmu
BMDC_SC11_2	SRR578579	BMDCs	101PE	10722184	PMID: 23685454 GEO: GSM1012787	Bone Marrow-derived Dendritic Cell (BMDC), C57BL/6, 4h LPS stimulation, Single cell S11	Mmu
BMDC_SC11_3	SRR578580	BMDCs	101PE	10735971	PMID: 23685454 GEO: GSM1012787	Bone Marrow-derived Dendritic Cell (BMDC), C57BL/6, 4h LPS stimulation, Single cell S11	Mmu
BMDC_SC12_1	SRR578581	BMDCs	101PE	6814517	PMID: 23685454 GEO: GSM1012788	Bone Marrow-derived Dendritic Cell (BMDC), C57BL/6, 4h LPS stimulation, Single cell S12	Mmu
BMDC_SC12_2	SRR578582	BMDCs	101PE	7195919	PMID: 23685454 GEO: GSM1012788	Bone Marrow-derived Dendritic Cell (BMDC), C57BL/6, 4h LPS stimulation, Single cell S12	Mmu
BMDC_SC12_3	SRR578583	BMDCs	101PE	7151159	PMID: 23685454 GEO: GSM1012788	Bone Marrow-derived Dendritic Cell (BMDC), C57BL/6, 4h LPS stimulation, Single cell S12	Mmu
BMDC_SC13_1	SRR578584	BMDCs	101PE	9024335	PMID: 23685454 GEO: GSM1012789	Bone Marrow-derived Dendritic Cell (BMDC), C57BL/6, 4h LPS stimulation, Single cell S13	Mmu
BMDC_SC13_2	SRR578585	BMDCs	101PE	9848382	PMID: 23685454 GEO: GSM1012789	Bone Marrow-derived Dendritic Cell (BMDC), C57BL/6, 4h LPS stimulation, Single cell S13	Mmu
BMDC_SC13_3	SRR578586	BMDCs	101PE	9740116	PMID: 23685454 GEO: GSM1012789	Bone Marrow-derived Dendritic Cell (BMDC), C57BL/6, 4h LPS stimulation, Single cell S13	Mmu
BMDC_SC14_1	SRR578587	BMDCs	101PE	8224518	PMID: 23685454 GEO: GSM1012790	Bone Marrow-derived Dendritic Cell (BMDC), C57BL/6, 4h LPS stimulation, Single cell S14	Mmu
BMDC_SC14_2	SRR578588	BMDCs	101PE	9064141	PMID: 23685454 GEO: GSM1012790	Bone Marrow-derived Dendritic Cell (BMDC), C57BL/6, 4h LPS stimulation, Single cell S14	Mmu
BMDC_SC14_3	SRR578589	BMDCs	101PE	9062530	PMID: 23685454 GEO: GSM1012790	Bone Marrow-derived Dendritic Cell (BMDC), C57BL/6, 4h LPS stimulation, Single cell S14	Mmu
BMDC_SC15_1	SRR578590	BMDCs	101PE	8168995	PMID: 23685454 GEO: GSM1012791	Bone Marrow-derived Dendritic Cell (BMDC), C57BL/6, 4h LPS stimulation, Single cell S15	Mmu
BMDC_SC15_2	SRR578591	BMDCs	101PE	8821823	PMID: 23685454 GEO: GSM1012791	Bone Marrow-derived Dendritic Cell (BMDC), C57BL/6, 4h LPS stimulation, Single cell S15	Mmu
BMDC_SC15_3	SRR578592	BMDCs	101PE	8748757	PMID: 23685454 GEO: GSM1012791	Bone Marrow-derived Dendritic Cell (BMDC), C57BL/6, 4h LPS stimulation, Single cell S15	Mmu
BMDC_SC16_1	SRR578593	BMDCs	101PE	8525597	PMID: 23685454 GEO: GSM1012792	Bone Marrow-derived Dendritic Cell (BMDC), C57BL/6, 4h LPS stimulation, Single cell S16	Mmu
BMDC_SC16_2	SRR578594	BMDCs	101PE	9183687	PMID: 23685454 GEO: GSM1012792	Bone Marrow-derived Dendritic Cell (BMDC), C57BL/6, 4h LPS stimulation, Single cell S16	Mmu
BMDC_SC16_3	SRR578595	BMDCs	101PE	9093062	PMID: 23685454 GEO: GSM1012792	Bone Marrow-derived Dendritic Cell (BMDC), C57BL/6, 4h LPS stimulation, Single cell S16	Mmu
BMDC_SC17_1	SRR578596	BMDCs	101PE	8266431	PMID: 23685454 GEO: GSM1012793	Bone Marrow-derived Dendritic Cell (BMDC), C57BL/6, 4h LPS stimulation, Single cell S17	Mmu
BMDC_SC17_2	SRR578597	BMDCs	101PE	9093757	PMID: 23685454 GEO: GSM1012793	Bone Marrow-derived Dendritic Cell (BMDC), C57BL/6, 4h LPS stimulation, Single cell S17	Mmu
BMDC_SC17_3	SRR578598	BMDCs	101PE	8983334	PMID: 23685454 GEO: GSM1012793	Bone Marrow-derived Dendritic Cell (BMDC), C57BL/6, 4h LPS stimulation, Single cell S17	Mmu
BMDC_SC18_1	SRR578599	BMDCs	101PE	8477944	PMID: 23685454 GEO: GSM1012794	Bone Marrow-derived Dendritic Cell (BMDC), C57BL/6, 4h LPS stimulation, Single cell S18	Mmu
BMDC_SC18_2	SRR578600	BMDCs	101PE	8378549	PMID: 23685454 GEO: GSM1012794	Bone Marrow-derived Dendritic Cell (BMDC), C57BL/6, 4h LPS stimulation, Single cell S18	Mmu
BMDC_SC18_3	SRR578601	BMDCs	101PE	8433580	PMID: 23685454 GEO: GSM1012794	Bone Marrow-derived Dendritic Cell (BMDC), C57BL/6, 4h LPS stimulation, Single cell S18	Mmu
ES_serum1_SC49	ERR523146	mESCs (serum)	100PE	14031282	PRJEB6455	mESC G4, serum1_49	Mmu
ES_serum1_SC54	ERR523131	mESCs (serum)	100PE	22131359	PRJEB6455	mESC G4, serum1_54	Mmu
ES_serum1_SC61	ERR522913	mESCs (serum)	100PE	14405862	PRJEB6455	mESC G4, serum1_61	Mmu
ES_serum1_SC67	ERR523082	mESCs (serum)	100PE	14254245	PRJEB6455	mESC G4, serum1_67	Mmu
ES_serum1_SC72	ERR523088	mESCs (serum)	100PE	15921202	PRJEB6455	mESC G4, serum1_72	Mmu
ES_serum1_SC80	ERR523205	mESCs (serum)	100PE	13973680	PRJEB6455	mESC G4, serum1_80	Mmu
ES_serum1_SC84	ERR522940	mESCs (serum)	100PE	46729016	PRJEB6455	mESC G4, serum1_84	Mmu
ES_serum1_SC95	ERR522821	mESCs (serum)	100PE	13498548	PRJEB6455	mESC G4, serum1_95	Mmu
ES_serum1_SC96	ERR523168	mESCs (serum)	100PE	28663214	PRJEB6455	mESC G4, serum1_96	Mmu
ES_2i_SC3_18	ERR1211193	mESCs (2i)	100PE	13562102	PRJEB6455	mESC G4, 2i_3_18	Mmu
ES_2i_SC4_1	ERR1211464	mESCs (2i)	100PE	13920457	PRJEB6455	mESC G4, 2i_4_1	Mmu
ES_2i_SC4_2	ERR1211465	mESCs (2i)	100PE	15692762	PRJEB6455	mESC G4, 2i_4_2	Mmu
ES_2i_SC4_41	ERR1211504	mESCs (2i)	100PE	13929219	PRJEB6455	mESC G4, 2i_4_41	Mmu
ES_2i_SC4_51	ERR1211514	mESCs (2i)	100PE	15777071	PRJEB6455	mESC G4, 2i_4_51	Mmu
ES_2i_SC4_55	ERR1211518	mESCs (2i)	100PE	15237345	PRJEB6455	mESC G4, 2i_4_55	Mmu
ES_2i_SC5_43	ERR1211602	mESCs (2i)	100PE	14537848	PRJEB6455	mESC G4, 2i_5_43	Mmu
ES_2i_SC47	ERR522860	mESCs (2i)	100PE	14823859	PRJEB6455	mESC G4, 2i_47	Mmu
ES_2i_SC60	ERR522874	mESCs (2i)	100PE	15265724	PRJEB6455	mESC G4, 2i_60	Mmu
ES_2i_SC59	ERR522881	mESCs (2i)	100PE	19852851	PRJEB6455	mESC G4, 2i_59	Mmu
ES_2i_SC19	ERR522929	mESCs (2i)	100PE	13309222	PRJEB6455	mESC G4, 2i_19	Mmu
ES_2i_SC54	ERR522946	mESCs (2i)	100PE	15217043	PRJEB6455	mESC G4, 2i_54	Mmu
ES_2i_SC92	ERR522986	mESCs (2i)	100PE	21395731	PRJEB6455	mESC G4, 2i_92	Mmu
ES_2i_SC71	ERR522999	mESCs (2i)	100PE	17254375	PRJEB6455	mESC G4, 2i_71	Mmu
ES_2i_SC36	ERR523113	mESCs (2i)	100PE	13788298	PRJEB6455	mESC G4, 2i_36	Mmu
ES_2i_SC66	ERR523124	mESCs (2i)	100PE	13694467	PRJEB6455	mESC G4, 2i_66	Mmu
ES_2i_SC42	ERR523130	mESCs (2i)	100PE	14537771	PRJEB6455	mESC G4, 2i_42	Mmu
ES_2i_SC65	ERR523143	mESCs (2i)	100PE	15546376	PRJEB6455	mESC G4, 2i_65	Mmu
ES_2i_SC18	ERR523160	mESCs (2i)	100PE	17242789	PRJEB6455	mESC G4, 2i_18	Mmu
ES_2i_SC94	ERR523203	mESCs (2i)	100PE	15756027	PRJEB6455	mESC G4, 2i_94	Mmu
Cux2_tdTpositive_SC1	SRR2138782	Neurons (Cux2+)	89SE	41809191	PMID: 26727548, GEO: GSM1839370	Cux2-tdT, cell 1	Mmu
Cux2_tdTpositive_SC2	SRR2138783	Neurons (Cux2+)	89SE	41274488	PMID: 26727548, GEO: GSM1839371	Cux2-tdT, cell 2	Mmu
Cux2_tdTpositive_SC3	SRR2138784	Neurons (Cux2+)	89SE	41227851	PMID: 26727548, GEO: GSM1839372	Cux2-tdT, cell 3	Mmu
Cux2_tdTpositive_SC4	SRR2138785	Neurons (Cux2+)	90SE	18750789	PMID: 26727548, GEO: GSM1839373	Cux2-tdT, cell 4	Mmu
Cux2_tdTpositive_SC6	SRR2138787	Neurons (Cux2+)	89SE	17879274	PMID: 26727548, GEO: GSM1839375	Cux2-tdT, cell 6	Mmu
Cux2_tdTpositive_SC7	SRR2138788	Neurons (Cux2+)	90SE	20482826	PMID: 26727548, GEO: GSM1839376	Cux2-tdT, cell 7	Mmu
Cux2_tdTpositive_SC8	SRR2138789	Neurons (Cux2+)	89SE	16389083	PMID: 26727548, GEO: GSM1839377	Cux2-tdT, cell 8	Mmu
Cux2_tdTpositive_SC35	SRR2138816	Neurons (Cux2+)	90SE	18015164	PMID: 26727548, GEO: GSM1839404	Cux2-tdT, cell 35	Mmu
Cux2_tdTpositive_SC38	SRR2138819	Neurons (Cux2+)	93SE	16773346	PMID: 26727548, GEO: GSM1839407	Cux2-tdT, cell 38	Mmu
Cux2_tdTpositive_SC44	SRR2138825	Neurons (Cux2+)	90SE	20812322	PMID: 26727548, GEO: GSM1839413	Cux2-tdT, cell 44	Mmu
Cux2_tdTpositive_SC46	SRR2138827	Neurons (Cux2+)	89SE	24282516	PMID: 26727548, GEO: GSM1839415	Cux2-tdT, cell 46	Mmu
Cux2_tdTpositive_SC47	SRR2138828	Neurons (Cux2+)	90SE	25916825	PMID: 26727548, GEO: GSM1839416	Cux2-tdT, cell 47	Mmu
Cux2_tdTpositive_SC92	SRR2138873	Neurons (Cux2+)	92SE	23004607	PMID: 26727548, GEO: GSM1839461	Cux2-tdT, cell 92	Mmu
Cux2_tdTpositive_SC115	SRR2138896	Neurons (Cux2+)	90SE	54717425	PMID: 26727548, GEO: GSM1839484	Cux2-tdT, cell 115	Mmu
Cux2_tdTpositive_SC116	SRR2138897	Neurons (Cux2+)	91SE	30710335	PMID: 26727548, GEO: GSM1839485	Cux2-tdT, cell 116	Mmu
Cux2_tdTpositive_SC117	SRR2138898	Neurons (Cux2+)	91SE	42274840	PMID: 26727548, GEO: GSM1839486	Cux2-tdT, cell 117	Mmu
Cux2_tdTpositive_SC118	SRR2138899	Neurons (Cux2+)	92SE	83371892	PMID: 26727548, GEO: GSM1839487	Cux2-tdT, cell 118	Mmu
Cux2_tdTpositive_SC119	SRR2138900	Neurons (Cux2+)	92SE	75847506	PMID: 26727548, GEO: GSM1839488	Cux2-tdT, cell 119	Mmu
Cux2_tdTpositive_SC120	SRR2138901	Neurons (Cux2+)	92SE	85479774	PMID: 26727548, GEO: GSM1839489	Cux2-tdT, cell 120	Mmu
Cux2_tdTpositive_SC121	SRR2138902	Neurons (Cux2+)	91SE	81243089	PMID: 26727548, GEO: GSM1839490	Cux2-tdT, cell_121	Mmu
Nr5a1_tdTpositive_SC1	SRR2139254	Neurons (Nr5a1+)	91SE	23262958	PMID: 26727548, GEO: GSM1839842	Nr5a1_tdT, cell 1	Mmu
Nr5a1_tdTpositive_SC2	SRR2139255	Neurons (Nr5a1+)	90SE	19205399	PMID: 26727548, GEO: GSM1839843	Nr5a1_tdT, cell 2	Mmu
Nr5a1_tdTpositive_SC3	SRR2139256	Neurons (Nr5a1+)	90SE	23799134	PMID: 26727548, GEO: GSM1839844	Nr5a1_tdT, cell 3	Mmu
Nr5a1_tdTpositive_SC4	SRR2139257	Neurons (Nr5a1+)	90SE	23153514	PMID: 26727548, GEO: GSM1839845	Nr5a1_tdT, cell 4	Mmu
Nr5a1_tdTpositive_SC5	SRR2139258	Neurons (Nr5a1+)	90SE	23368182	PMID: 26727548, GEO: GSM1839846	Nr5a1_tdT, cell 5	Mmu
Nr5a1_tdTpositive_SC8	SRR2139261	Neurons (Nr5a1+)	90SE	23537327	PMID: 26727548, GEO: GSM1839849	Nr5a1_tdT, cell 8	Mmu
Nr5a1_tdTpositive_SC15	SRR2139268	Neurons (Nr5a1+)	94SE	12275236	PMID: 26727548, GEO: GSM1839856	Nr5a1_tdT, cell 15	Mmu
Nr5a1_tdTpositive_SC17	SRR2139270	Neurons (Nr5a1+)	93SE	27170867	PMID: 26727548, GEO: GSM1839858	Nr5a1_tdT, cell 17	Mmu
Nr5a1_tdTpositive_SC37	SRR2139290	Neurons (Nr5a1+)	92SE	33990618	PMID: 26727548, GEO: GSM1839878	Nr5a1_tdT, cell 37	Mmu
Nr5a1_tdTpositive_SC38	SRR2139291	Neurons (Nr5a1+)	92SE	41327236	PMID: 26727548, GEO: GSM1839879	Nr5a1_tdT, cell 38	Mmu
Nr5a1_tdTpositive_SC39	SRR2139292	Neurons (Nr5a1+)	92SE	20567476	PMID: 26727548, GEO: GSM1839880	Nr5a1_tdT, cell 39	Mmu
Nr5a1_tdTpositive_SC40	SRR2139293	Neurons (Nr5a1+)	93SE	17313138	PMID: 26727548, GEO: GSM1839881	Nr5a1_tdT, cell 40	Mmu
Nr5a1_tdTpositive_SC41	SRR2139294	Neurons (Nr5a1+)	93SE	25956927	PMID: 26727548, GEO: GSM1839882	Nr5a1_tdT, cell 41	Mmu
Nr5a1_tdTpositive_SC42	SRR2139295	Neurons (Nr5a1+)	92SE	39083605	PMID: 26727548, GEO: GSM1839883	Nr5a1_tdT, cell 42	Mmu
Nr5a1_tdTpositive_SC43	SRR2139296	Neurons (Nr5a1+)	92SE	23509273	PMID: 26727548, GEO: GSM1839884	Nr5a1_tdT, cell 43	Mmu
Nr5a1_tdTpositive_SC44	SRR2139297	Neurons (Nr5a1+)	88SE	14538172	PMID: 26727548, GEO: GSM1839885	Nr5a1_tdT, cell 44	Mmu
Nr5a1_tdTpositive_SC46	SRR2139299	Neurons (Nr5a1+)	87SE	15709611	PMID: 26727548, GEO: GSM1839887	Nr5a1_tdT, cell 46	Mmu
Nr5a1_tdTpositive_SC47	SRR2139300	Neurons (Nr5a1+)	87SE	12087340	PMID: 26727548, GEO: GSM1839888	Nr5a1_tdT, cell 47	Mmu
Nr5a1_tdTpositive_SC48	SRR2139301	Neurons (Nr5a1+)	90SE	12148114	PMID: 26727548, GEO: GSM1839889	Nr5a1_tdT, cell 48	Mmu
Nr5a1_tdTpositive_SC50	SRR2139303	Neurons (Nr5a1+)	92SE	17479933	PMID: 26727548, GEO: GSM1839891	Nr5a1_tdT, cell 50	Mmu
Embr_2C_mid_c0_1	SRR805377	Mouse 2-cell embryos	53SE	17654642	PMID: 24408435, GEO: GSM1112694	Mid 2-cell stage blastomere, CAST/EiJ(mother) x C57BL/6J(father), embryo 0, cell 1	Mmu
Embr_2C_mid_c0_2	SRR805378	Mouse 2-cell embryos	53SE	16301323	PMID: 24408435, GEO: GSM1112695	Mid 2-cell stage blastomere, CAST/EiJ(mother) x C57BL/6J(father), embryo 0, cell 2	Mmu
Embr_2C_mid_c3_1	SRR805379	Mouse 2-cell embryos	53SE	12900008	PMID: 24408435, GEO: GSM1112696	Mid 2-cell stage blastomere, CAST/EiJ(mother) x C57BL/6J(father), embryo 3, cell 1	Mmu
Embr_2C_mid_c3_2	SRR805380	Mouse 2-cell embryos	53SE	17154972	PMID: 24408435, GEO: GSM1112697	Mid 2-cell stage blastomere, CAST/EiJ(mother) x C57BL/6J(father), embryo 3, cell 2	Mmu
Embr_2C_mid_c4_1	SRR805381	Mouse 2-cell embryos	53SE	15230149	PMID: 24408435, GEO: GSM1112698	Mid 2-cell stage blastomere, CAST/EiJ(mother) x C57BL/6J(father), embryo 4, cell 1	Mmu
Embr_2C_mid_c4_2	SRR805382	Mouse 2-cell embryos	53SE	20043158	PMID: 24408435, GEO: GSM1112699	Mid 2-cell stage blastomere, CAST/EiJ(mother) x C57BL/6J(father), embryo 4, cell 2	Mmu
Embr_2C_mid_c5_2	SRR805384	Mouse 2-cell embryos	46SE	12147248	PMID: 24408435, GEO: GSM1112701	Mid 2-cell stage blastomere, CAST/EiJ(mother) x C57BL/6J(father), embryo 5, cell 2	Mmu
Embr_2C_mid_c6_1	SRR805385	Mouse 2-cell embryos	46SE	12832391	PMID: 24408435, GEO: GSM1112702	Mid 2-cell stage blastomere, CAST/EiJ(mother) x C57BL/6J(father), embryo 6, cell 1	Mmu
Embr_2C_mid_c6_2	SRR805386	Mouse 2-cell embryos	46SE	13031244	PMID: 24408435, GEO: GSM1112703	Mid 2-cell stage blastomere, CAST/EiJ(mother) x C57BL/6J(father), embryo 6, cell 2	Mmu
Embr_2C_mid_c7_2	SRR805388	Mouse 2-cell embryos	46SE	21700901	PMID: 24408435, GEO: GSM1112705	Mid 2-cell stage blastomere, CAST/EiJ(mother) x C57BL/6J(father), embryo 7, cell 2	Mmu
Embr_2C_late_c5_1	SRR805337	Mouse 2-cell embryos	59SE	102560296	PMID: 24408435, GEO: GSM1112654	Late 2-cell stage blastomere, CAST/EiJ(mother) x C57BL/6J(father), embryo 5, cell 1	Mmu
Embr_2C_late_c5_2	SRR805338	Mouse 2-cell embryos	52SE	124946227	PMID: 24408435, GEO: GSM1112655	Late 2-cell stage blastomere, CAST/EiJ(mother) x C57BL/6J(father), embryo 5, cell 2	Mmu
Embr_2C_late_c6_1	SRR805339	Mouse 2-cell embryos	59SE	134169143	PMID: 24408435, GEO: GSM1112656	Late 2-cell stage blastomere, CAST/EiJ(mother) x C57BL/6J(father), embryo 6, cell 1	Mmu
Embr_2C_late_c6_2	SRR805340	Mouse 2-cell embryos	59SE	121345710	PMID: 24408435, GEO: GSM1112657	Late 2-cell stage blastomere, CAST/EiJ(mother) x C57BL/6J(father), embryo 6, cell 2	Mmu
Embr_2C_late_c7_1	SRR805341	Mouse 2-cell embryos	59SE	105705756	PMID: 24408435, GEO: GSM1112658	Late 2-cell stage blastomere, CAST/EiJ(mother) x C57BL/6J(father), embryo 7, cell 1	Mmu
Embr_2C_late_c7_2	SRR805342	Mouse 2-cell embryos	59SE	123798880	PMID: 24408435, GEO: GSM1112659	Late 2-cell stage blastomere, CAST/EiJ(mother) x C57BL/6J(father), embryo 7, cell 2	Mmu
Embr_2C_late_c8_1	SRR805343	Mouse 2-cell embryos	59SE	104517449	PMID: 24408435, GEO: GSM1112660	Late 2-cell stage blastomere, CAST/EiJ(mother) x C57BL/6J(father), embryo 8, cell 1	Mmu
Embr_2C_late_c8_2	SRR805344	Mouse 2-cell embryos	59SE	127274761	PMID: 24408435, GEO: GSM1112661	Late 2-cell stage blastomere, CAST/EiJ(mother) x C57BL/6J(father), embryo 8, cell 2	Mmu
Embr_2C_late_c9_1	SRR805345	Mouse 2-cell embryos	59SE	139702936	PMID: 24408435, GEO: GSM1112662	Late 2-cell stage blastomere, CAST/EiJ(mother) x C57BL/6J(father), embryo 9, cell 1	Mmu
Embr_2C_late_c9_2	SRR805346	Mouse 2-cell embryos	59SE	110861721	PMID: 24408435, GEO: GSM1112663	Late 2-cell stage blastomere, CAST/EiJ(mother) x C57BL/6J(father), embryo 9, cell 2	Mmu
Embr_8C_c1_1	SRR805237	Mouse 8-cell embryos	53SE	21768233	PMID: 24408435, GEO: GSM1112554	8-cell stage blastomere, CAST/EiJ(mother) x C57BL/6J(father), embryo 1, cell 1	Mmu
Embr_8C_c1_2	SRR805238	Mouse 8-cell embryos	53SE	18511017	PMID: 24408435, GEO: GSM1112555	8-cell stage blastomere, CAST/EiJ(mother) x C57BL/6J(father), embryo 1, cell 2	Mmu
Embr_8C_c1_6	SRR805241	Mouse 8-cell embryos	53SE	21578159	PMID: 24408435, GEO: GSM1112558	8-cell stage blastomere, CAST/EiJ(mother) x C57BL/6J(father), embryo 1, cell 6	Mmu
Embr_8C_c1_7	SRR805242	Mouse 8-cell embryos	53SE	22229782	PMID: 24408435, GEO: GSM1112559	8-cell stage blastomere, CAST/EiJ(mother) x C57BL/6J(father), embryo 1, cell 7	Mmu
Embr_8C_c1_8	SRR805243	Mouse 8-cell embryos	53SE	20533150	PMID: 24408435, GEO: GSM1112560	8-cell stage blastomere, CAST/EiJ(mother) x C57BL/6J(father), embryo 1, cell 8	Mmu
Embr_8C_c2_1	SRR805244	Mouse 8-cell embryos	46SE	21974683	PMID: 24408435, GEO: GSM1112561	8-cell stage blastomere, CAST/EiJ(mother) x C57BL/6J(father), embryo 2, cell 1	Mmu
Embr_8C_c2_2	SRR805245	Mouse 8-cell embryos	46SE	22015925	PMID: 24408435, GEO: GSM1112562	8-cell stage blastomere, CAST/EiJ(mother) x C57BL/6J(father), embryo 2, cell 2	Mmu
Embr_8C_c2_3	SRR805246	Mouse 8-cell embryos	46SE	26480853	PMID: 24408435, GEO: GSM1112563	8-cell stage blastomere, CAST/EiJ(mother) x C57BL/6J(father), embryo 2, cell 3	Mmu
Embr_8C_c2_4	SRR805247	Mouse 8-cell embryos	46SE	25269417	PMID: 24408435, GEO: GSM1112564	8-cell stage blastomere, CAST/EiJ(mother) x C57BL/6J(father), embryo 2, cell 4	Mmu
Embr_8C_c2_7	SRR805249	Mouse 8-cell embryos	46SE	19431497	PMID: 24408435, GEO: GSM1112566	8-cell stage blastomere, CAST/EiJ(mother) x C57BL/6J(father), embryo 2, cell 7	Mmu
Embr_8C_c2_8	SRR805250	Mouse 8-cell embryos	46SE	32447701	PMID: 24408435, GEO: GSM1112567	8-cell stage blastomere, CAST/EiJ(mother) x C57BL/6J(father), embryo 2, cell 8	Mmu
Embr_8C_c5_1	SRR805251	Mouse 8-cell embryos	46SE	34400925	PMID: 24408435, GEO: GSM1112568	8-cell stage blastomere, CAST/EiJ(mother) x C57BL/6J(father), embryo 5, cell 1	Mmu
Embr_8C_c5_2	SRR805252	Mouse 8-cell embryos	46SE	40004990	PMID: 24408435, GEO: GSM1112569	8-cell stage blastomere, CAST/EiJ(mother) x C57BL/6J(father), embryo 5, cell 2	Mmu
Embr_8C_c5_3	SRR805253	Mouse 8-cell embryos	46SE	31709629	PMID: 24408435, GEO: GSM1112570	8-cell stage blastomere, CAST/EiJ(mother) x C57BL/6J(father), embryo 5, cell 3	Mmu
Embr_8C_c5_6	SRR805255	Mouse 8-cell embryos	53SE	21028384	PMID: 24408435, GEO: GSM1112572	8-cell stage blastomere, CAST/EiJ(mother) x C57BL/6J(father), embryo 5, cell 6	Mmu
Embr_8C_c5_8	SRR805257	Mouse 8-cell embryos	53SE	18533010	PMID: 24408435, GEO: GSM1112574	8-cell stage blastomere, CAST/EiJ(mother) x C57BL/6J(father), embryo 5, cell 8	Mmu
Embr_8C_c8_1	SRR805258	Mouse 8-cell embryos	53SE	20864480	PMID: 24408435, GEO: GSM1112575	8-cell stage blastomere, CAST/EiJ(mother) x C57BL/6J(father), embryo 8, cell 1	Mmu
Embr_8C_c8_2	SRR805259	Mouse 8-cell embryos	53SE	38589221	PMID: 24408435, GEO: GSM1112576	8-cell stage blastomere, CAST/EiJ(mother) x C57BL/6J(father), embryo 8, cell 2	Mmu
Embr_8C_c8_3	SRR805260	Mouse 8-cell embryos	53SE	20043172	PMID: 24408435, GEO: GSM1112577	8-cell stage blastomere, CAST/EiJ(mother) x C57BL/6J(father), embryo 8, cell 3	Mmu
Embr_8C_c8_7	SRR805263	Mouse 8-cell embryos	53SE	18720561	PMID: 24408435, GEO: GSM1112580	8-cell stage blastomere, CAST/EiJ(mother) x C57BL/6J(father), embryo 8, cell 7	Mmu

## Sheet: Tissue specific analysis
SampleName	GroupName	Excluded	Species
Adipose_b	Adipose	Breast	Hsa
Adipose_c	Adipose	Breast	Hsa
Adipose_d	Adipose	Breast	Hsa
Adrenal_b	Adrenal	NA	Hsa
Adrenal_c	Adrenal	NA	Hsa
Amnion	Epithelium	NA	Hsa
Bladder_a	Bladder	NA	Hsa
Bone_marrow_a	Immune_Hematop	NA	Hsa
Bone_marrow_b	Immune_Hematop	NA	Hsa
Bone_marrow_c	Immune_Hematop	NA	Hsa
Breast_a	Breast	Adipose	Hsa
Breast_Epith_a	Epithelium	CL_PNT2,ESC	Hsa
Cerebellum_a	Neural	Neuroblastoma,Microglia,Oligodendrocytes,Astrocytes,NPC	Hsa
Cerebellum_c	Neural	Neuroblastoma,Microglia,Oligodendrocytes,Astrocytes,NPC	Hsa
Chorion	Epithelium	NA	Hsa
CL_293T	CL_293T	NA	Hsa
CL_Gm12878	CL_Lymphoid	NA	Hsa
CL_HeLa	CL_HeLa	NA	Hsa
CL_K562	CL_Lymphoid	NA	Hsa
CL_LP1	CL_Lymphoid	NA	Hsa
CL_MB231	CL_MB231	NA	Hsa
CL_MCF7	CL_MCF7	NA	Hsa
CL_PNT2	CL_PNT2	Epithelium,ESC	Hsa
Colon_b	DigestiveTract	NA	Hsa
Colon_sigmoid	DigestiveTract	NA	Hsa
Colon_transverse	DigestiveTract	NA	Hsa
Decidua	EXCLUDE	NA	Hsa
EndomStromCells	EndomStromCells	Uterus	Hsa
EndothCells	Endothelium	NA	Hsa
EpithelialCells	Epithelium	CL_PNT2,ESC	Hsa
ESC_H1_a	ESC	Epithelium,CL_PNT2	Hsa
ESC_H1_b	ESC	Epithelium,CL_PNT2	Hsa
ESC_H1_c	ESC	Epithelium,CL_PNT2	Hsa
ESC_H1_d	ESC	Epithelium,CL_PNT2	Hsa
ESC_H9_a	ESC	Epithelium,CL_PNT2	Hsa
ESC_H9_b	ESC	Epithelium,CL_PNT2	Hsa
Fibroblasts	Fibroblasts	NA	Hsa
GLS_cells	GLS_cells	NA	Hsa
Heart_a	Heart	Muscle	Hsa
Heart_b	Heart	Muscle	Hsa
Heart_c	Heart	Muscle	Hsa
HFDPC	HFDPC	NA	Hsa
HMEpC_a	Epithelium	CL_PNT2,ESC	Hsa
iPS_a	ESC	Epithelium,CL_PNT2	Hsa
iPS_b	ESC	Epithelium,CL_PNT2	Hsa
Kidney_b	Kidney	NA	Hsa
Kidney_c	Kidney	NA	Hsa
Kidney_d	Kidney	NA	Hsa
Liver_a	Liver	NA	Hsa
Liver_b	Liver	NA	Hsa
Liver_c	Liver	NA	Hsa
Lung_b	Lung	NA	Hsa
Lung_e	Lung	NA	Hsa
Lung_f	Lung	NA	Hsa
Lymph_node_b	Immune_Hematop	NA	Hsa
Lymph_node_c	Immune_Hematop	NA	Hsa
Melanocytes	Melanocytes	NA	Hsa
MSC	MSC	NA	Hsa
Muscle_b	Muscle	Heart	Hsa
Muscle_d	Muscle	Heart	Hsa
Muscle_e	Muscle	Heart	Hsa
NPC_a	NPC	Neuroblastoma,Microglia,Oligodendrocytes,Astrocytes,Neural	Hsa
NPC_b	NPC	Neuroblastoma,Microglia,Oligodendrocytes,Astrocytes,Neural	Hsa
Embr_Forebrain_St13_14	EXCLUDE	NA	Hsa
Embr_Forebrain_St17_20	EXCLUDE	NA	Hsa
Embr_Forebrain_St22_23	EXCLUDE	NA	Hsa
Embr_Forebrain_9_12wpc	EXCLUDE	NA	Hsa
Embr_Cortex_13_17wpc	EXCLUDE	NA	Hsa
Cortex	Neural	Neuroblastoma,Microglia,Oligodendrocytes,Astrocytes,NPC	Hsa
Frontal_Gyrus_old	Neural	Neuroblastoma,Microglia,Oligodendrocytes,Astrocytes,NPC	Hsa
Frontal_Gyrus_young	Neural	Neuroblastoma,Microglia,Oligodendrocytes,Astrocytes,NPC	Hsa
Sup_Temporal_Gyrus	Neural	Neuroblastoma,Microglia,Oligodendrocytes,Astrocytes,NPC	Hsa
Whole_brain_b	Neural	Neuroblastoma,Microglia,Oligodendrocytes,Astrocytes,NPC	Hsa
Retina_a	EXCLUDE	NA	Hsa
Retina_macular	EXCLUDE	NA	Hsa
Retina_peripheral	EXCLUDE	NA	Hsa
Neurons	Neural	Neuroblastoma,Microglia,Oligodendrocytes,Astrocytes,NPC	Hsa
Astrocytes	EXCLUDE	Neuroblastoma,Microglia,Oligodendrocytes,Neural,NPC	Hsa
Microglia	EXCLUDE	Neuroblastoma,Neural,Oligodendrocytes,Astrocytes,NPC	Hsa
Oligodendrocytes	EXCLUDE	Neuroblastoma,Microglia,NPC,Astrocytes,Neural	Hsa
Neuroblastoma	Neuroblastoma	Microglia,Neural,Oligodendrocytes,Astrocytes	Hsa
Brain_Endoth	Endothelium	NA	Hsa
Ovary_a	Ovary	NA	Hsa
Ovary_b	Ovary	NA	Hsa
Placenta_a	Placenta	NA	Hsa
Placenta_b	Placenta	NA	Hsa
Placenta_c	Placenta	NA	Hsa
Placenta_Epith	Epithelium	CL_PNT2,ESC	Hsa
Prostate_b	Prostate	NA	Hsa
Prostate_c	Prostate	NA	Hsa
Prostate_d	Prostate	NA	Hsa
Skin	Epithelium	CL_PNT2,ESC	Hsa
Small_intestine	DigestiveTract	NA	Hsa
Spleen_a	Immune_Hematop	NA	Hsa
Spleen_b	Immune_Hematop	NA	Hsa
Stomach_a	DigestiveTract	NA	Hsa
Stomach_b	DigestiveTract	NA	Hsa
Testis_a	Testis	NA	Hsa
Testis_b	Testis	NA	Hsa
Testis_c	Testis	NA	Hsa
Thymus_a	Immune_Hematop	NA	Hsa
Thymus_b	Immune_Hematop	NA	Hsa
Thyroid_b	Thyroid	NA	Hsa
Thyroid_c	Thyroid	NA	Hsa
Thyroid_d	Thyroid	NA	Hsa
MonoNucCells	Immune_Hematop	NA	Hsa
WBC_MNC_b	Immune_Hematop	NA	Hsa
WBC_MNC_c	Immune_Hematop	NA	Hsa
Adrenal_a	Adrenal	NA	Mmu
Adrenal_b	Adrenal	NA	Mmu
Adrenal_c	Adrenal	NA	Mmu
Astrocytes	EXCLUDE	NA	Mmu
Bladder_a	Bladder	NA	Mmu
Bladder_b	Bladder	NA	Mmu
Bladder_c	Bladder	NA	Mmu
Bone_marrow	Immune_Hematop	CL_Lymphoid	Mmu
Brain_Endothelium	EXCLUDE	NA	Mmu
Brown_Adipose	Adipose	MammGland	Mmu
Cerebellum_a	Neural	NPC,CL_N2A	Mmu
Cerebellum_b	Neural	NPC,CL_N2A	Mmu
Cerebellum_c	Neural	NPC,CL_N2A	Mmu
CL_3T3_a	Fibroblast	NA	Mmu
CL_3T3_b	Fibroblast	NA	Mmu
CL_C2C12_a	Myoblast	Heart,Muscle	Mmu
CL_C2C12_b	Myoblast	Heart,Muscle	Mmu
CL_CH12	CL_Lymphoid	Immune_Hematop	Mmu
CL_MEL	CL_Lymphoid	Immune_Hematop	Mmu
CL_N2A_b	CL_N2A	NPC,Neural	Mmu
CL_N2A_c	CL_N2A	NPC,Neural	Mmu
Colon_a	DigestiveTract	NA	Mmu
Colon_b	DigestiveTract	NA	Mmu
Colon_c	DigestiveTract	NA	Mmu
Cortex_a	Neural	NPC,CL_N2A	Mmu
Cortex_b	Neural	NPC,CL_N2A	Mmu
Embr_2C_a	EarlyDev	ESC,PGC	Mmu
Embr_2C_c	EarlyDev	ESC,PGC	Mmu
Embr_4C_a	EarlyDev	ESC,PGC	Mmu
Embr_4C_b	EarlyDev	ESC,PGC	Mmu
Embr_8C_a	EarlyDev	ESC,PGC	Mmu
Embr_8C_b	EarlyDev	ESC,PGC	Mmu
Embr_Brain_E11_5	EXCLUDE	NA	Mmu
Embr_Brain_E14_5	EXCLUDE	NA	Mmu
Embr_Cortex_E17_5	EXCLUDE	NA	Mmu
Embr_Limb_E14_5	EXCLUDE	NA	Mmu
Embr_Liver_E14_5	EXCLUDE	NA	Mmu
ESC_CGR8	ESC	PGC,EarlyDev	Mmu
ESC_D3	ESC	PGC,EarlyDev	Mmu
ESC_E14	ESC	PGC,EarlyDev	Mmu
ESC_J1	ESC	PGC,EarlyDev	Mmu
ESC_OS25_TT2	ESC	PGC,EarlyDev	Mmu
ESC_v65	ESC	PGC,EarlyDev	Mmu
Eye_a	EXCLUDE	NA	Mmu
Eye_b	EXCLUDE	NA	Mmu
Eye_c	EXCLUDE	NA	Mmu
FatPad_a	Adipose	MammGland	Mmu
FatPad_b	Adipose	MammGland	Mmu
Frontal_Lobe	Neural	NPC,CL_N2A	Mmu
Heart_a	Heart	Muscle,Myoblast	Mmu
Heart_b	Heart	Muscle,Myoblast	Mmu
Heart_c	Heart	Muscle,Myoblast	Mmu
Heart_d	Heart	Muscle,Myoblast	Mmu
Hippocampus	Neural	NPC,CL_N2A	Mmu
Hypothalamus	Neural	NPC,CL_N2A	Mmu
Intestine_small_a	DigestiveTract	NA	Mmu
Intestine_small_b	DigestiveTract	NA	Mmu
iPS_a	ESC	PGC,EarlyDev	Mmu
iPS_b	ESC	PGC,EarlyDev	Mmu
Keratinocytes	Skin	NA	Mmu
Kidney_a	Kidney	NA	Mmu
Kidney_b	Kidney	NA	Mmu
Kidney_c	Kidney	NA	Mmu
Liver_a	Liver	NA	Mmu
Liver_b	Liver	NA	Mmu
Liver_c	Liver	NA	Mmu
Lung_a	Lung	NA	Mmu
Lung_c	Lung	NA	Mmu
Lung_d	Lung	NA	Mmu
Lymph_node_a	Immune_Hematop	NA	Mmu
Lymph_node_b	Immune_Hematop	NA	Mmu
MammGland_a	MammGland	NA	Mmu
MammGland_b	MammGland	NA	Mmu
MammGland_c	MammGland	NA	Mmu
MEF_a	Fibroblast	NA	Mmu
MEF_b	Fibroblast	NA	Mmu
MEF_c	Fibroblast	NA	Mmu
Microglia	EXCLUDE	NA	Mmu
Muscle_a	Muscle	Heart,Myoblast	Mmu
Muscle_b	Muscle	Heart,Myoblast	Mmu
Muscle_c	Muscle	Heart,Myoblast	Mmu
Myelinated_Oligod	EXCLUDE	NA	Mmu
Myoblast_0h	Myoblast	Heart,Muscle	Mmu
Myoblast_120h	EXCLUDE	NA	Mmu
Myoblast_168h	EXCLUDE	NA	Mmu
Myoblast_60h	EXCLUDE	NA	Mmu
Neurons_a	Neural	NPC,CL_N2A	Mmu
Neurons_b	Neural	NPC,CL_N2A	Mmu
Neurons_KCl_0h	Neural	NPC,CL_N2A	Mmu
Neurons_KCl_3h	EXCLUDE	NA	Mmu
New_Oligod	EXCLUDE	NA	Mmu
NPC_a	NPC	Neural,CL_N2A	Mmu
NPC_c	NPC	Neural,CL_N2A	Mmu
NPC_d	NPC	Neural,CL_N2A	Mmu
OligodPC	EXCLUDE	NA	Mmu
Oocyte_a	EarlyDev	NA	Mmu
Oocyte_b	EarlyDev	NA	Mmu
Ovary_a	Ovary	NA	Mmu
Ovary_b	Ovary	NA	Mmu
Pancreas_9weeks	Pancreas	NA	Mmu
Pancreas_NewBorn	Pancreas	NA	Mmu
PGC_E13_5	PGC	Testis,ESC,EarlyDev	Mmu
PGC_E9_5_11_5	PGC	Testis,ESC,EarlyDev	Mmu
Placenta_a	Placenta	NA	Mmu
Placenta_c	Placenta	NA	Mmu
Placenta_d	Placenta	NA	Mmu
Prostate_a	Prostate	NA	Mmu
Prostate_b	Prostate	NA	Mmu
Retina_a	Neural	NPC,CL_N2A	Mmu
Retina_b	Neural	NPC,CL_N2A	Mmu
Retina_c	Neural	NPC,CL_N2A	Mmu
Sertoli_cells	EXCLUDE	NA	Mmu
Skin_a	Skin	NA	Mmu
Skin_b	Skin	NA	Mmu
Skin_c	Skin	NA	Mmu
Spermatids	EXCLUDE	NA	Mmu
Spermatocytes	EXCLUDE	NA	Mmu
Spermatogonia	EXCLUDE	NA	Mmu
Spermatozoa	EXCLUDE	NA	Mmu
Spleen_a	Immune_Hematop	CL_Lymphoid	Mmu
Spleen_b	Immune_Hematop	CL_Lymphoid	Mmu
Spleen_c	Immune_Hematop	CL_Lymphoid	Mmu
Stomach	DigestiveTract	NA	Mmu
Stomach_b	DigestiveTract	NA	Mmu
Stomach_c	DigestiveTract	NA	Mmu
Testis_a	Testis	PGC	Mmu
Testis_b	Testis	PGC	Mmu
Testis_c	Testis	PGC	Mmu
Thalamus	Neural	NPC,CL_N2A	Mmu
Thymus_a	Immune_Hematop	CL_Lymphoid	Mmu
Thymus_b	Immune_Hematop	CL_Lymphoid	Mmu
Thymus_c	Immune_Hematop	CL_Lymphoid	Mmu
Thyroid_a	Thyroid	NA	Mmu
Thyroid_b	Thyroid	NA	Mmu
Uterus	Uterus	NA	Mmu
Ventricular_Zone	NPC	Neural,CL_N2A	Mmu
White_Adipose	Adipose	MammGland	Mmu
Whole_Brain_a	Neural	NPC,CL_N2A	Mmu
Whole_Brain_b	Neural	NPC,CL_N2A	Mmu
Embr_StageX_a	EarlyDev	NA	Gga
Embr_StageX_b	EarlyDev	NA	Gga
Embr_StageX_c	EarlyDev	NA	Gga
Embr_Blastoderm_Fem	EarlyDev	NA	Gga
Embr_Blastoderm_Male	EarlyDev	NA	Gga
Embr_PrimStreak	EarlyDev	NA	Gga
Embr_HH4_c	EarlyDev	NA	Gga
Embr_HH6	EarlyDev	NA	Gga
Embr_HH11	MidDev	NA	Gga
Embr_HH11_c	MidDev	NA	Gga
Embr_HH14	MidDev	NA	Gga
Embr_HH14_c	MidDev	NA	Gga
Embr_HH16	MidDev	NA	Gga
Embr_HH19	MidDev	NA	Gga
Embr_HH21_22_c	MidDev	NA	Gga
Embr_HH25_26_c	MidDev	NA	Gga
Embr_HH28	MidDev	NA	Gga
Embr_7d	MidDev	NA	Gga
Embr_HH32_c	MidDev	NA	Gga
Embr_HH36_c	MidDev	NA	Gga
Embr_HH38	MidDev	NA	Gga
Fetal_FemGonads	EmbrGonads	Testis	Gga
Fetal_MaleGonads	EmbrGonads	Testis	Gga
Testis_BP	Testis	EmbrGonads	Gga
Testes_Male	Testis	EmbrGonads	Gga
Embr_Scales	EmbrScales	NA	Gga
NeuralCrest	NeuralCrest	NA	Gga
Brain_BNP	Neural	NA	Gga
Brain_Fem	Neural	NA	Gga
Brain_Male	Neural	NA	Gga
Brain_Telencephalon	Neural	NA	Gga
CerebellumP	Neural	NA	Gga
Heart_BNP	Heart	Muscle	Gga
Heart_Fem	Heart	Muscle	Gga
Heart_Male	Heart	Muscle	Gga
Muscle_BN	Muscle	Heart	Gga
Muscle_Fem	Muscle	Heart	Gga
Muscle_Male	Muscle	Heart	Gga
Tibial_bone	Tibial_bone	NA	Gga
AbdominalFat	AbdominalFat	NA	Gga
Bursa_Fem	Bursa	NA	Gga
Bursa_Male	Bursa	NA	Gga
Colon	Colon	NA	Gga
Kidney_BNP	Kidney	NA	Gga
Kidney_Fem	Kidney	NA	Gga
Kidney_Male	Kidney	NA	Gga
Liver_BNP	Liver	NA	Gga
Liver_Fem	Liver	NA	Gga
Liver_Male	Liver	NA	Gga
Lung_Fem	Lung	NA	Gga
Lung_Male	Lung	NA	Gga
LungB	Lung	NA	Gga
Magnum	Magnum	NA	Gga
Ovarium_Fem	Ovarium_Fem	NA	Gga
Spleen_Fem	Spleen	NA	Gga
Spleen_Male	Spleen	NA	Gga
SpleenB	Spleen	NA	Gga
BMDMacroph	BMDMacroph	NA	Gga
CL_DF1	CL_DF1	NA	Gga
CL_DT40	CL_DT40	NA	Gga
CL_DT40_c	CL_DT40	NA	Gga
