# Supplementary material for: An atlas of alternative splicing profiles and functional associations reveals new regulatory programs and genes that simultaneously express multiple major isoforms
Source: HighWire-hosted journal article supplement (doi:10.1101/gr.220962.117), 2017-08-30
Supplement: Supplemental_Table_S2.xlsx [file Supplemental_Table_S2.xlsx]

## Sheet: Supplemental Table S2
Supplemental Table S2 – Raw data from the benchmarking analysis. Raw values from the benchmarking analysis in Supplemental Fig. S3 comparing vast-tools, rMATS, MAJIQ, and MISO. “FRACTION” shows the fraction of AS events for each type in which the PSI or ΔPSI (“MEASUREMENT_TYPE”) deviates from the ground truth < 1%, 1-5%, 5-10%, 10-25% or > 25% (“DEVIATION_FROM_TRUE_VALUE”).
SOFTWARE	EVENT_TYPE	EVENT_COMPLEXITY	COVERAGE	MEASUREMENT_TYPE	DEVIATION_FROM_TRUE_VALUE	FRACTION
VAST-TOOLS	AltEx	simpleASEs	covlow	PSI	<1%	0.202797
VAST-TOOLS	AltEx	simpleASEs	covlow	PSI	1-5%	0.472028
VAST-TOOLS	AltEx	simpleASEs	covlow	PSI	5-10%	0.213287
VAST-TOOLS	AltEx	simpleASEs	covlow	PSI	10-25%	0.0839161
VAST-TOOLS	AltEx	simpleASEs	covlow	PSI	>25%	0.027972
MAJIQ	AltEx	simpleASEs	covlow	PSI	<1%	0.216783
MAJIQ	AltEx	simpleASEs	covlow	PSI	1-5%	0.447552
MAJIQ	AltEx	simpleASEs	covlow	PSI	5-10%	0.157343
MAJIQ	AltEx	simpleASEs	covlow	PSI	10-25%	0.0979021
MAJIQ	AltEx	simpleASEs	covlow	PSI	>25%	0.0804196
MISO	AltEx	simpleASEs	covlow	PSI	<1%	0.143357
MISO	AltEx	simpleASEs	covlow	PSI	1-5%	0.328671
MISO	AltEx	simpleASEs	covlow	PSI	5-10%	0.15035
MISO	AltEx	simpleASEs	covlow	PSI	10-25%	0.216783
MISO	AltEx	simpleASEs	covlow	PSI	>25%	0.160839
rMATS	AltEx	simpleASEs	covlow	PSI	<1%	0.0979021
rMATS	AltEx	simpleASEs	covlow	PSI	1-5%	0.265734
rMATS	AltEx	simpleASEs	covlow	PSI	5-10%	0.216783
rMATS	AltEx	simpleASEs	covlow	PSI	10-25%	0.276224
rMATS	AltEx	simpleASEs	covlow	PSI	>25%	0.143357
VAST-TOOLS	AltEx	simpleASEs	covhigh	PSI	<1%	0.275573
VAST-TOOLS	AltEx	simpleASEs	covhigh	PSI	1-5%	0.444656
VAST-TOOLS	AltEx	simpleASEs	covhigh	PSI	5-10%	0.139695
VAST-TOOLS	AltEx	simpleASEs	covhigh	PSI	10-25%	0.0980916
VAST-TOOLS	AltEx	simpleASEs	covhigh	PSI	>25%	0.0419847
MAJIQ	AltEx	simpleASEs	covhigh	PSI	<1%	0.242366
MAJIQ	AltEx	simpleASEs	covhigh	PSI	1-5%	0.530534
MAJIQ	AltEx	simpleASEs	covhigh	PSI	5-10%	0.0996183
MAJIQ	AltEx	simpleASEs	covhigh	PSI	10-25%	0.0660305
MAJIQ	AltEx	simpleASEs	covhigh	PSI	>25%	0.0614504
MISO	AltEx	simpleASEs	covhigh	PSI	<1%	0.114122
MISO	AltEx	simpleASEs	covhigh	PSI	1-5%	0.284351
MISO	AltEx	simpleASEs	covhigh	PSI	5-10%	0.134733
MISO	AltEx	simpleASEs	covhigh	PSI	10-25%	0.220229
MISO	AltEx	simpleASEs	covhigh	PSI	>25%	0.246565
rMATS	AltEx	simpleASEs	covhigh	PSI	<1%	0.0751908
rMATS	AltEx	simpleASEs	covhigh	PSI	1-5%	0.247328
rMATS	AltEx	simpleASEs	covhigh	PSI	5-10%	0.218321
rMATS	AltEx	simpleASEs	covhigh	PSI	10-25%	0.325954
rMATS	AltEx	simpleASEs	covhigh	PSI	>25%	0.133206
VAST-TOOLS	AltEx	simpleASEs	covall	PSI	<1%	0.26841
VAST-TOOLS	AltEx	simpleASEs	covall	PSI	1-5%	0.44735
VAST-TOOLS	AltEx	simpleASEs	covall	PSI	5-10%	0.146937
VAST-TOOLS	AltEx	simpleASEs	covall	PSI	10-25%	0.0966965
VAST-TOOLS	AltEx	simpleASEs	covall	PSI	>25%	0.0406056
MAJIQ	AltEx	simpleASEs	covall	PSI	<1%	0.239849
MAJIQ	AltEx	simpleASEs	covall	PSI	1-5%	0.522368
MAJIQ	AltEx	simpleASEs	covall	PSI	5-10%	0.105299
MAJIQ	AltEx	simpleASEs	covall	PSI	10-25%	0.0691672
MAJIQ	AltEx	simpleASEs	covall	PSI	>25%	0.0633173
MISO	AltEx	simpleASEs	covall	PSI	<1%	0.116999
MISO	AltEx	simpleASEs	covall	PSI	1-5%	0.288713
MISO	AltEx	simpleASEs	covall	PSI	5-10%	0.13627
MISO	AltEx	simpleASEs	covall	PSI	10-25%	0.21989
MISO	AltEx	simpleASEs	covall	PSI	>25%	0.238128
rMATS	AltEx	simpleASEs	covall	PSI	<1%	0.077426
rMATS	AltEx	simpleASEs	covall	PSI	1-5%	0.24914
rMATS	AltEx	simpleASEs	covall	PSI	5-10%	0.218169
rMATS	AltEx	simpleASEs	covall	PSI	10-25%	0.32106
rMATS	AltEx	simpleASEs	covall	PSI	>25%	0.134205
VAST-TOOLS	AltEx	complexASEs	covlow	PSI	<1%	0.14433
VAST-TOOLS	AltEx	complexASEs	covlow	PSI	1-5%	0.402062
VAST-TOOLS	AltEx	complexASEs	covlow	PSI	5-10%	0.195876
VAST-TOOLS	AltEx	complexASEs	covlow	PSI	10-25%	0.206186
VAST-TOOLS	AltEx	complexASEs	covlow	PSI	>25%	0.0515464
MAJIQ	AltEx	complexASEs	covlow	PSI	<1%	0.113402
MAJIQ	AltEx	complexASEs	covlow	PSI	1-5%	0.340206
MAJIQ	AltEx	complexASEs	covlow	PSI	5-10%	0.247423
MAJIQ	AltEx	complexASEs	covlow	PSI	10-25%	0.175258
MAJIQ	AltEx	complexASEs	covlow	PSI	>25%	0.123711
MISO	AltEx	complexASEs	covlow	PSI	<1%	0.0309278
MISO	AltEx	complexASEs	covlow	PSI	1-5%	0.14433
MISO	AltEx	complexASEs	covlow	PSI	5-10%	0.28866
MISO	AltEx	complexASEs	covlow	PSI	10-25%	0.28866
MISO	AltEx	complexASEs	covlow	PSI	>25%	0.247423
rMATS	AltEx	complexASEs	covlow	PSI	<1%	0.0412371
rMATS	AltEx	complexASEs	covlow	PSI	1-5%	0.226804
rMATS	AltEx	complexASEs	covlow	PSI	5-10%	0.226804
rMATS	AltEx	complexASEs	covlow	PSI	10-25%	0.360825
rMATS	AltEx	complexASEs	covlow	PSI	>25%	0.14433
VAST-TOOLS	AltEx	complexASEs	covhigh	PSI	<1%	0.163421
VAST-TOOLS	AltEx	complexASEs	covhigh	PSI	1-5%	0.396274
VAST-TOOLS	AltEx	complexASEs	covhigh	PSI	5-10%	0.190517
VAST-TOOLS	AltEx	complexASEs	covhigh	PSI	10-25%	0.190517
VAST-TOOLS	AltEx	complexASEs	covhigh	PSI	>25%	0.0592718
MAJIQ	AltEx	complexASEs	covhigh	PSI	<1%	0.151566
MAJIQ	AltEx	complexASEs	covhigh	PSI	1-5%	0.429297
MAJIQ	AltEx	complexASEs	covhigh	PSI	5-10%	0.187976
MAJIQ	AltEx	complexASEs	covhigh	PSI	10-25%	0.165114
MAJIQ	AltEx	complexASEs	covhigh	PSI	>25%	0.0660457
MISO	AltEx	complexASEs	covhigh	PSI	<1%	0.088061
MISO	AltEx	complexASEs	covhigh	PSI	1-5%	0.234547
MISO	AltEx	complexASEs	covhigh	PSI	5-10%	0.196444
MISO	AltEx	complexASEs	covhigh	PSI	10-25%	0.264183
MISO	AltEx	complexASEs	covhigh	PSI	>25%	0.216765
rMATS	AltEx	complexASEs	covhigh	PSI	<1%	0.0821338
rMATS	AltEx	complexASEs	covhigh	PSI	1-5%	0.243014
rMATS	AltEx	complexASEs	covhigh	PSI	5-10%	0.199831
rMATS	AltEx	complexASEs	covhigh	PSI	10-25%	0.333616
rMATS	AltEx	complexASEs	covhigh	PSI	>25%	0.141406
VAST-TOOLS	AltEx	complexASEs	covall	PSI	<1%	0.161972
VAST-TOOLS	AltEx	complexASEs	covall	PSI	1-5%	0.396714
VAST-TOOLS	AltEx	complexASEs	covall	PSI	5-10%	0.190923
VAST-TOOLS	AltEx	complexASEs	covall	PSI	10-25%	0.191706
VAST-TOOLS	AltEx	complexASEs	covall	PSI	>25%	0.0586854
MAJIQ	AltEx	complexASEs	covall	PSI	<1%	0.14867
MAJIQ	AltEx	complexASEs	covall	PSI	1-5%	0.422535
MAJIQ	AltEx	complexASEs	covall	PSI	5-10%	0.192488
MAJIQ	AltEx	complexASEs	covall	PSI	10-25%	0.165884
MAJIQ	AltEx	complexASEs	covall	PSI	>25%	0.0704225
MISO	AltEx	complexASEs	covall	PSI	<1%	0.0837246
MISO	AltEx	complexASEs	covall	PSI	1-5%	0.2277
MISO	AltEx	complexASEs	covall	PSI	5-10%	0.203443
MISO	AltEx	complexASEs	covall	PSI	10-25%	0.266041
MISO	AltEx	complexASEs	covall	PSI	>25%	0.219092
rMATS	AltEx	complexASEs	covall	PSI	<1%	0.0790297
rMATS	AltEx	complexASEs	covall	PSI	1-5%	0.241784
rMATS	AltEx	complexASEs	covall	PSI	5-10%	0.201878
rMATS	AltEx	complexASEs	covall	PSI	10-25%	0.335681
rMATS	AltEx	complexASEs	covall	PSI	>25%	0.141628
VAST-TOOLS	AltEx	simpleAndcomplexASEs	covlow	PSI	<1%	0.18799
VAST-TOOLS	AltEx	simpleAndcomplexASEs	covlow	PSI	1-5%	0.454308
VAST-TOOLS	AltEx	simpleAndcomplexASEs	covlow	PSI	5-10%	0.208877
VAST-TOOLS	AltEx	simpleAndcomplexASEs	covlow	PSI	10-25%	0.114883
VAST-TOOLS	AltEx	simpleAndcomplexASEs	covlow	PSI	>25%	0.0339426
MAJIQ	AltEx	simpleAndcomplexASEs	covlow	PSI	<1%	0.190601
MAJIQ	AltEx	simpleAndcomplexASEs	covlow	PSI	1-5%	0.420366
MAJIQ	AltEx	simpleAndcomplexASEs	covlow	PSI	5-10%	0.180157
MAJIQ	AltEx	simpleAndcomplexASEs	covlow	PSI	10-25%	0.117493
MAJIQ	AltEx	simpleAndcomplexASEs	covlow	PSI	>25%	0.0913838
MISO	AltEx	simpleAndcomplexASEs	covlow	PSI	<1%	0.114883
MISO	AltEx	simpleAndcomplexASEs	covlow	PSI	1-5%	0.281984
MISO	AltEx	simpleAndcomplexASEs	covlow	PSI	5-10%	0.185379
MISO	AltEx	simpleAndcomplexASEs	covlow	PSI	10-25%	0.234987
MISO	AltEx	simpleAndcomplexASEs	covlow	PSI	>25%	0.182768
rMATS	AltEx	simpleAndcomplexASEs	covlow	PSI	<1%	0.0835509
rMATS	AltEx	simpleAndcomplexASEs	covlow	PSI	1-5%	0.255875
rMATS	AltEx	simpleAndcomplexASEs	covlow	PSI	5-10%	0.219321
rMATS	AltEx	simpleAndcomplexASEs	covlow	PSI	10-25%	0.29765
rMATS	AltEx	simpleAndcomplexASEs	covlow	PSI	>25%	0.143603
VAST-TOOLS	AltEx	simpleAndcomplexASEs	covhigh	PSI	<1%	0.240726
VAST-TOOLS	AltEx	simpleAndcomplexASEs	covhigh	PSI	1-5%	0.429624
VAST-TOOLS	AltEx	simpleAndcomplexASEs	covhigh	PSI	5-10%	0.155485
VAST-TOOLS	AltEx	simpleAndcomplexASEs	covhigh	PSI	10-25%	0.126809
VAST-TOOLS	AltEx	simpleAndcomplexASEs	covhigh	PSI	>25%	0.047356
MAJIQ	AltEx	simpleAndcomplexASEs	covhigh	PSI	<1%	0.214154
MAJIQ	AltEx	simpleAndcomplexASEs	covhigh	PSI	1-5%	0.499079
MAJIQ	AltEx	simpleAndcomplexASEs	covhigh	PSI	5-10%	0.127072
MAJIQ	AltEx	simpleAndcomplexASEs	covhigh	PSI	10-25%	0.0968166
MAJIQ	AltEx	simpleAndcomplexASEs	covhigh	PSI	>25%	0.0628782
MISO	AltEx	simpleAndcomplexASEs	covhigh	PSI	<1%	0.106025
MISO	AltEx	simpleAndcomplexASEs	covhigh	PSI	1-5%	0.268877
MISO	AltEx	simpleAndcomplexASEs	covhigh	PSI	5-10%	0.153907
MISO	AltEx	simpleAndcomplexASEs	covhigh	PSI	10-25%	0.233886
MISO	AltEx	simpleAndcomplexASEs	covhigh	PSI	>25%	0.237306
rMATS	AltEx	simpleAndcomplexASEs	covhigh	PSI	<1%	0.0773481
rMATS	AltEx	simpleAndcomplexASEs	covhigh	PSI	1-5%	0.245988
rMATS	AltEx	simpleAndcomplexASEs	covhigh	PSI	5-10%	0.212576
rMATS	AltEx	simpleAndcomplexASEs	covhigh	PSI	10-25%	0.328335
rMATS	AltEx	simpleAndcomplexASEs	covhigh	PSI	>25%	0.135754
VAST-TOOLS	AltEx	simpleAndcomplexASEs	covall	PSI	<1%	0.235899
VAST-TOOLS	AltEx	simpleAndcomplexASEs	covall	PSI	1-5%	0.431883
VAST-TOOLS	AltEx	simpleAndcomplexASEs	covall	PSI	5-10%	0.160373
VAST-TOOLS	AltEx	simpleAndcomplexASEs	covall	PSI	10-25%	0.125717
VAST-TOOLS	AltEx	simpleAndcomplexASEs	covall	PSI	>25%	0.0461281
MAJIQ	AltEx	simpleAndcomplexASEs	covall	PSI	<1%	0.211998
MAJIQ	AltEx	simpleAndcomplexASEs	covall	PSI	1-5%	0.491874
MAJIQ	AltEx	simpleAndcomplexASEs	covall	PSI	5-10%	0.131931
MAJIQ	AltEx	simpleAndcomplexASEs	covall	PSI	10-25%	0.0987094
MAJIQ	AltEx	simpleAndcomplexASEs	covall	PSI	>25%	0.0654876
MISO	AltEx	simpleAndcomplexASEs	covall	PSI	<1%	0.106836
MISO	AltEx	simpleAndcomplexASEs	covall	PSI	1-5%	0.270076
MISO	AltEx	simpleAndcomplexASEs	covall	PSI	5-10%	0.156788
MISO	AltEx	simpleAndcomplexASEs	covall	PSI	10-25%	0.233987
MISO	AltEx	simpleAndcomplexASEs	covall	PSI	>25%	0.232314
rMATS	AltEx	simpleAndcomplexASEs	covall	PSI	<1%	0.0779159
rMATS	AltEx	simpleAndcomplexASEs	covall	PSI	1-5%	0.246893
rMATS	AltEx	simpleAndcomplexASEs	covall	PSI	5-10%	0.213193
rMATS	AltEx	simpleAndcomplexASEs	covall	PSI	10-25%	0.325526
rMATS	AltEx	simpleAndcomplexASEs	covall	PSI	>25%	0.136472
VAST-TOOLS	AltEx	simpleASEs	covlow	dPSI	<1%	0.137931
VAST-TOOLS	AltEx	simpleASEs	covlow	dPSI	1-5%	0.517241
VAST-TOOLS	AltEx	simpleASEs	covlow	dPSI	5-10%	0.247126
VAST-TOOLS	AltEx	simpleASEs	covlow	dPSI	10-25%	0.0862069
VAST-TOOLS	AltEx	simpleASEs	covlow	dPSI	>25%	0.0114943
MAJIQ	AltEx	simpleASEs	covlow	dPSI	<1%	0.166667
MAJIQ	AltEx	simpleASEs	covlow	dPSI	1-5%	0.37931
MAJIQ	AltEx	simpleASEs	covlow	dPSI	5-10%	0.206897
MAJIQ	AltEx	simpleASEs	covlow	dPSI	10-25%	0.201149
MAJIQ	AltEx	simpleASEs	covlow	dPSI	>25%	0.045977
MISO	AltEx	simpleASEs	covlow	dPSI	<1%	0.126437
MISO	AltEx	simpleASEs	covlow	dPSI	1-5%	0.298851
MISO	AltEx	simpleASEs	covlow	dPSI	5-10%	0.212644
MISO	AltEx	simpleASEs	covlow	dPSI	10-25%	0.201149
MISO	AltEx	simpleASEs	covlow	dPSI	>25%	0.16092
rMATS	AltEx	simpleASEs	covlow	dPSI	<1%	0.0632184
rMATS	AltEx	simpleASEs	covlow	dPSI	1-5%	0.316092
rMATS	AltEx	simpleASEs	covlow	dPSI	5-10%	0.224138
rMATS	AltEx	simpleASEs	covlow	dPSI	10-25%	0.321839
rMATS	AltEx	simpleASEs	covlow	dPSI	>25%	0.0747126
VAST-TOOLS	AltEx	simpleASEs	covhigh	dPSI	<1%	0.303362
VAST-TOOLS	AltEx	simpleASEs	covhigh	dPSI	1-5%	0.498827
VAST-TOOLS	AltEx	simpleASEs	covhigh	dPSI	5-10%	0.116497
VAST-TOOLS	AltEx	simpleASEs	covhigh	dPSI	10-25%	0.0648944
VAST-TOOLS	AltEx	simpleASEs	covhigh	dPSI	>25%	0.0164191
MAJIQ	AltEx	simpleASEs	covhigh	dPSI	<1%	0.227522
MAJIQ	AltEx	simpleASEs	covhigh	dPSI	1-5%	0.501173
MAJIQ	AltEx	simpleASEs	covhigh	dPSI	5-10%	0.164973
MAJIQ	AltEx	simpleASEs	covhigh	dPSI	10-25%	0.0695856
MAJIQ	AltEx	simpleASEs	covhigh	dPSI	>25%	0.0367475
MISO	AltEx	simpleASEs	covhigh	dPSI	<1%	0.139953
MISO	AltEx	simpleASEs	covhigh	dPSI	1-5%	0.317435
MISO	AltEx	simpleASEs	covhigh	dPSI	5-10%	0.172791
MISO	AltEx	simpleASEs	covhigh	dPSI	10-25%	0.200156
MISO	AltEx	simpleASEs	covhigh	dPSI	>25%	0.169664
rMATS	AltEx	simpleASEs	covhigh	dPSI	<1%	0.128225
rMATS	AltEx	simpleASEs	covhigh	dPSI	1-5%	0.349492
rMATS	AltEx	simpleASEs	covhigh	dPSI	5-10%	0.231431
rMATS	AltEx	simpleASEs	covhigh	dPSI	10-25%	0.224394
rMATS	AltEx	simpleASEs	covhigh	dPSI	>25%	0.0664582
VAST-TOOLS	AltEx	simpleASEs	covall	dPSI	<1%	0.283551
VAST-TOOLS	AltEx	simpleASEs	covall	dPSI	1-5%	0.501032
VAST-TOOLS	AltEx	simpleASEs	covall	dPSI	5-10%	0.13214
VAST-TOOLS	AltEx	simpleASEs	covall	dPSI	10-25%	0.0674467
VAST-TOOLS	AltEx	simpleASEs	covall	dPSI	>25%	0.0158293
MAJIQ	AltEx	simpleASEs	covall	dPSI	<1%	0.220234
MAJIQ	AltEx	simpleASEs	covall	dPSI	1-5%	0.486579
MAJIQ	AltEx	simpleASEs	covall	dPSI	5-10%	0.169993
MAJIQ	AltEx	simpleASEs	covall	dPSI	10-25%	0.0853407
MAJIQ	AltEx	simpleASEs	covall	dPSI	>25%	0.0378527
MISO	AltEx	simpleASEs	covall	dPSI	<1%	0.138334
MISO	AltEx	simpleASEs	covall	dPSI	1-5%	0.31521
MISO	AltEx	simpleASEs	covall	dPSI	5-10%	0.177564
MISO	AltEx	simpleASEs	covall	dPSI	10-25%	0.200275
MISO	AltEx	simpleASEs	covall	dPSI	>25%	0.168617
rMATS	AltEx	simpleASEs	covall	dPSI	<1%	0.12044
rMATS	AltEx	simpleASEs	covall	dPSI	1-5%	0.345492
rMATS	AltEx	simpleASEs	covall	dPSI	5-10%	0.230557
rMATS	AltEx	simpleASEs	covall	dPSI	10-25%	0.236063
rMATS	AltEx	simpleASEs	covall	dPSI	>25%	0.0674467
VAST-TOOLS	AltEx	complexASEs	covlow	dPSI	<1%	0.137931
VAST-TOOLS	AltEx	complexASEs	covlow	dPSI	1-5%	0.293103
VAST-TOOLS	AltEx	complexASEs	covlow	dPSI	5-10%	0.293103
VAST-TOOLS	AltEx	complexASEs	covlow	dPSI	10-25%	0.258621
VAST-TOOLS	AltEx	complexASEs	covlow	dPSI	>25%	0.0172414
MAJIQ	AltEx	complexASEs	covlow	dPSI	<1%	0.137931
MAJIQ	AltEx	complexASEs	covlow	dPSI	1-5%	0.362069
MAJIQ	AltEx	complexASEs	covlow	dPSI	5-10%	0.206897
MAJIQ	AltEx	complexASEs	covlow	dPSI	10-25%	0.189655
MAJIQ	AltEx	complexASEs	covlow	dPSI	>25%	0.103448
MISO	AltEx	complexASEs	covlow	dPSI	<1%	0.0344828
MISO	AltEx	complexASEs	covlow	dPSI	1-5%	0.241379
MISO	AltEx	complexASEs	covlow	dPSI	5-10%	0.189655
MISO	AltEx	complexASEs	covlow	dPSI	10-25%	0.275862
MISO	AltEx	complexASEs	covlow	dPSI	>25%	0.258621
rMATS	AltEx	complexASEs	covlow	dPSI	<1%	0.12069
rMATS	AltEx	complexASEs	covlow	dPSI	1-5%	0.224138
rMATS	AltEx	complexASEs	covlow	dPSI	5-10%	0.224138
rMATS	AltEx	complexASEs	covlow	dPSI	10-25%	0.275862
rMATS	AltEx	complexASEs	covlow	dPSI	>25%	0.155172
VAST-TOOLS	AltEx	complexASEs	covhigh	dPSI	<1%	0.208262
VAST-TOOLS	AltEx	complexASEs	covhigh	dPSI	1-5%	0.459552
VAST-TOOLS	AltEx	complexASEs	covhigh	dPSI	5-10%	0.158348
VAST-TOOLS	AltEx	complexASEs	covhigh	dPSI	10-25%	0.144578
VAST-TOOLS	AltEx	complexASEs	covhigh	dPSI	>25%	0.0292599
MAJIQ	AltEx	complexASEs	covhigh	dPSI	<1%	0.194492
MAJIQ	AltEx	complexASEs	covhigh	dPSI	1-5%	0.445783
MAJIQ	AltEx	complexASEs	covhigh	dPSI	5-10%	0.179002
MAJIQ	AltEx	complexASEs	covhigh	dPSI	10-25%	0.144578
MAJIQ	AltEx	complexASEs	covhigh	dPSI	>25%	0.0361446
MISO	AltEx	complexASEs	covhigh	dPSI	<1%	0.108434
MISO	AltEx	complexASEs	covhigh	dPSI	1-5%	0.296041
MISO	AltEx	complexASEs	covhigh	dPSI	5-10%	0.222031
MISO	AltEx	complexASEs	covhigh	dPSI	10-25%	0.266781
MISO	AltEx	complexASEs	covhigh	dPSI	>25%	0.106713
rMATS	AltEx	complexASEs	covhigh	dPSI	<1%	0.0929432
rMATS	AltEx	complexASEs	covhigh	dPSI	1-5%	0.339071
rMATS	AltEx	complexASEs	covhigh	dPSI	5-10%	0.24957
rMATS	AltEx	complexASEs	covhigh	dPSI	10-25%	0.261618
rMATS	AltEx	complexASEs	covhigh	dPSI	>25%	0.0567986
VAST-TOOLS	AltEx	complexASEs	covall	dPSI	<1%	0.201878
VAST-TOOLS	AltEx	complexASEs	covall	dPSI	1-5%	0.444444
VAST-TOOLS	AltEx	complexASEs	covall	dPSI	5-10%	0.170579
VAST-TOOLS	AltEx	complexASEs	covall	dPSI	10-25%	0.15493
VAST-TOOLS	AltEx	complexASEs	covall	dPSI	>25%	0.028169
MAJIQ	AltEx	complexASEs	covall	dPSI	<1%	0.189358
MAJIQ	AltEx	complexASEs	covall	dPSI	1-5%	0.438185
MAJIQ	AltEx	complexASEs	covall	dPSI	5-10%	0.181534
MAJIQ	AltEx	complexASEs	covall	dPSI	10-25%	0.14867
MAJIQ	AltEx	complexASEs	covall	dPSI	>25%	0.0422535
MISO	AltEx	complexASEs	covall	dPSI	<1%	0.101721
MISO	AltEx	complexASEs	covall	dPSI	1-5%	0.29108
MISO	AltEx	complexASEs	covall	dPSI	5-10%	0.219092
MISO	AltEx	complexASEs	covall	dPSI	10-25%	0.267606
MISO	AltEx	complexASEs	covall	dPSI	>25%	0.120501
rMATS	AltEx	complexASEs	covall	dPSI	<1%	0.0954617
rMATS	AltEx	complexASEs	covall	dPSI	1-5%	0.328638
rMATS	AltEx	complexASEs	covall	dPSI	5-10%	0.247261
rMATS	AltEx	complexASEs	covall	dPSI	10-25%	0.262911
rMATS	AltEx	complexASEs	covall	dPSI	>25%	0.0657277
VAST-TOOLS	AltEx	simpleAndcomplexASEs	covlow	dPSI	<1%	0.137931
VAST-TOOLS	AltEx	simpleAndcomplexASEs	covlow	dPSI	1-5%	0.461207
VAST-TOOLS	AltEx	simpleAndcomplexASEs	covlow	dPSI	5-10%	0.258621
VAST-TOOLS	AltEx	simpleAndcomplexASEs	covlow	dPSI	10-25%	0.12931
VAST-TOOLS	AltEx	simpleAndcomplexASEs	covlow	dPSI	>25%	0.012931
MAJIQ	AltEx	simpleAndcomplexASEs	covlow	dPSI	<1%	0.159483
MAJIQ	AltEx	simpleAndcomplexASEs	covlow	dPSI	1-5%	0.375
MAJIQ	AltEx	simpleAndcomplexASEs	covlow	dPSI	5-10%	0.206897
MAJIQ	AltEx	simpleAndcomplexASEs	covlow	dPSI	10-25%	0.198276
MAJIQ	AltEx	simpleAndcomplexASEs	covlow	dPSI	>25%	0.0603448
MISO	AltEx	simpleAndcomplexASEs	covlow	dPSI	<1%	0.103448
MISO	AltEx	simpleAndcomplexASEs	covlow	dPSI	1-5%	0.284483
MISO	AltEx	simpleAndcomplexASEs	covlow	dPSI	5-10%	0.206897
MISO	AltEx	simpleAndcomplexASEs	covlow	dPSI	10-25%	0.219828
MISO	AltEx	simpleAndcomplexASEs	covlow	dPSI	>25%	0.185345
rMATS	AltEx	simpleAndcomplexASEs	covlow	dPSI	<1%	0.0775862
rMATS	AltEx	simpleAndcomplexASEs	covlow	dPSI	1-5%	0.293103
rMATS	AltEx	simpleAndcomplexASEs	covlow	dPSI	5-10%	0.224138
rMATS	AltEx	simpleAndcomplexASEs	covlow	dPSI	10-25%	0.310345
rMATS	AltEx	simpleAndcomplexASEs	covlow	dPSI	>25%	0.0948276
VAST-TOOLS	AltEx	simpleAndcomplexASEs	covhigh	dPSI	<1%	0.273656
VAST-TOOLS	AltEx	simpleAndcomplexASEs	covhigh	dPSI	1-5%	0.486559
VAST-TOOLS	AltEx	simpleAndcomplexASEs	covhigh	dPSI	5-10%	0.12957
VAST-TOOLS	AltEx	simpleAndcomplexASEs	covhigh	dPSI	10-25%	0.0897849
VAST-TOOLS	AltEx	simpleAndcomplexASEs	covhigh	dPSI	>25%	0.0204301
MAJIQ	AltEx	simpleAndcomplexASEs	covhigh	dPSI	<1%	0.217204
MAJIQ	AltEx	simpleAndcomplexASEs	covhigh	dPSI	1-5%	0.483871
MAJIQ	AltEx	simpleAndcomplexASEs	covhigh	dPSI	5-10%	0.169355
MAJIQ	AltEx	simpleAndcomplexASEs	covhigh	dPSI	10-25%	0.0930108
MAJIQ	AltEx	simpleAndcomplexASEs	covhigh	dPSI	>25%	0.0365591
MISO	AltEx	simpleAndcomplexASEs	covhigh	dPSI	<1%	0.130108
MISO	AltEx	simpleAndcomplexASEs	covhigh	dPSI	1-5%	0.310753
MISO	AltEx	simpleAndcomplexASEs	covhigh	dPSI	5-10%	0.188172
MISO	AltEx	simpleAndcomplexASEs	covhigh	dPSI	10-25%	0.220968
MISO	AltEx	simpleAndcomplexASEs	covhigh	dPSI	>25%	0.15
rMATS	AltEx	simpleAndcomplexASEs	covhigh	dPSI	<1%	0.117204
rMATS	AltEx	simpleAndcomplexASEs	covhigh	dPSI	1-5%	0.346237
rMATS	AltEx	simpleAndcomplexASEs	covhigh	dPSI	5-10%	0.237097
rMATS	AltEx	simpleAndcomplexASEs	covhigh	dPSI	10-25%	0.236022
rMATS	AltEx	simpleAndcomplexASEs	covhigh	dPSI	>25%	0.0634409
VAST-TOOLS	AltEx	simpleAndcomplexASEs	covall	dPSI	<1%	0.258604
VAST-TOOLS	AltEx	simpleAndcomplexASEs	covall	dPSI	1-5%	0.483748
VAST-TOOLS	AltEx	simpleAndcomplexASEs	covall	dPSI	5-10%	0.143881
VAST-TOOLS	AltEx	simpleAndcomplexASEs	covall	dPSI	10-25%	0.0941683
VAST-TOOLS	AltEx	simpleAndcomplexASEs	covall	dPSI	>25%	0.0195985
MAJIQ	AltEx	simpleAndcomplexASEs	covall	dPSI	<1%	0.210803
MAJIQ	AltEx	simpleAndcomplexASEs	covall	dPSI	1-5%	0.471797
MAJIQ	AltEx	simpleAndcomplexASEs	covall	dPSI	5-10%	0.173518
MAJIQ	AltEx	simpleAndcomplexASEs	covall	dPSI	10-25%	0.104685
MAJIQ	AltEx	simpleAndcomplexASEs	covall	dPSI	>25%	0.0391969
MISO	AltEx	simpleAndcomplexASEs	covall	dPSI	<1%	0.127151
MISO	AltEx	simpleAndcomplexASEs	covall	dPSI	1-5%	0.307839
MISO	AltEx	simpleAndcomplexASEs	covall	dPSI	5-10%	0.190249
MISO	AltEx	simpleAndcomplexASEs	covall	dPSI	10-25%	0.220841
MISO	AltEx	simpleAndcomplexASEs	covall	dPSI	>25%	0.15392
rMATS	AltEx	simpleAndcomplexASEs	covall	dPSI	<1%	0.112811
rMATS	AltEx	simpleAndcomplexASEs	covall	dPSI	1-5%	0.340344
rMATS	AltEx	simpleAndcomplexASEs	covall	dPSI	5-10%	0.23566
rMATS	AltEx	simpleAndcomplexASEs	covall	dPSI	10-25%	0.244264
rMATS	AltEx	simpleAndcomplexASEs	covall	dPSI	>25%	0.0669216
VAST-TOOLS	AltEx	simpleASEs	covlow	PSI	<1%	0.202797
VAST-TOOLS	AltEx	simpleASEs	covlow	PSI	1-5%	0.472028
VAST-TOOLS	AltEx	simpleASEs	covlow	PSI	5-10%	0.213287
VAST-TOOLS	AltEx	simpleASEs	covlow	PSI	10-25%	0.0839161
VAST-TOOLS	AltEx	simpleASEs	covlow	PSI	>25%	0.027972
MAJIQ	AltEx	simpleASEs	covlow	PSI	<1%	0.216783
MAJIQ	AltEx	simpleASEs	covlow	PSI	1-5%	0.447552
MAJIQ	AltEx	simpleASEs	covlow	PSI	5-10%	0.157343
MAJIQ	AltEx	simpleASEs	covlow	PSI	10-25%	0.0979021
MAJIQ	AltEx	simpleASEs	covlow	PSI	>25%	0.0804196
MISO	AltEx	simpleASEs	covlow	PSI	<1%	0.143357
MISO	AltEx	simpleASEs	covlow	PSI	1-5%	0.328671
MISO	AltEx	simpleASEs	covlow	PSI	5-10%	0.15035
MISO	AltEx	simpleASEs	covlow	PSI	10-25%	0.216783
MISO	AltEx	simpleASEs	covlow	PSI	>25%	0.160839
rMATS	AltEx	simpleASEs	covlow	PSI	<1%	0.0979021
rMATS	AltEx	simpleASEs	covlow	PSI	1-5%	0.265734
rMATS	AltEx	simpleASEs	covlow	PSI	5-10%	0.216783
rMATS	AltEx	simpleASEs	covlow	PSI	10-25%	0.276224
rMATS	AltEx	simpleASEs	covlow	PSI	>25%	0.143357
VAST-TOOLS	AltEx	simpleASEs	covhigh	PSI	<1%	0.275573
VAST-TOOLS	AltEx	simpleASEs	covhigh	PSI	1-5%	0.444656
VAST-TOOLS	AltEx	simpleASEs	covhigh	PSI	5-10%	0.139695
VAST-TOOLS	AltEx	simpleASEs	covhigh	PSI	10-25%	0.0980916
VAST-TOOLS	AltEx	simpleASEs	covhigh	PSI	>25%	0.0419847
MAJIQ	AltEx	simpleASEs	covhigh	PSI	<1%	0.242366
MAJIQ	AltEx	simpleASEs	covhigh	PSI	1-5%	0.530534
MAJIQ	AltEx	simpleASEs	covhigh	PSI	5-10%	0.0996183
MAJIQ	AltEx	simpleASEs	covhigh	PSI	10-25%	0.0660305
MAJIQ	AltEx	simpleASEs	covhigh	PSI	>25%	0.0614504
MISO	AltEx	simpleASEs	covhigh	PSI	<1%	0.114122
MISO	AltEx	simpleASEs	covhigh	PSI	1-5%	0.284351
MISO	AltEx	simpleASEs	covhigh	PSI	5-10%	0.134733
MISO	AltEx	simpleASEs	covhigh	PSI	10-25%	0.220229
MISO	AltEx	simpleASEs	covhigh	PSI	>25%	0.246565
rMATS	AltEx	simpleASEs	covhigh	PSI	<1%	0.0751908
rMATS	AltEx	simpleASEs	covhigh	PSI	1-5%	0.247328
rMATS	AltEx	simpleASEs	covhigh	PSI	5-10%	0.218321
rMATS	AltEx	simpleASEs	covhigh	PSI	10-25%	0.325954
rMATS	AltEx	simpleASEs	covhigh	PSI	>25%	0.133206
VAST-TOOLS	AltEx	simpleASEs	covall	PSI	<1%	0.26841
VAST-TOOLS	AltEx	simpleASEs	covall	PSI	1-5%	0.44735
VAST-TOOLS	AltEx	simpleASEs	covall	PSI	5-10%	0.146937
VAST-TOOLS	AltEx	simpleASEs	covall	PSI	10-25%	0.0966965
VAST-TOOLS	AltEx	simpleASEs	covall	PSI	>25%	0.0406056
MAJIQ	AltEx	simpleASEs	covall	PSI	<1%	0.239849
MAJIQ	AltEx	simpleASEs	covall	PSI	1-5%	0.522368
MAJIQ	AltEx	simpleASEs	covall	PSI	5-10%	0.105299
MAJIQ	AltEx	simpleASEs	covall	PSI	10-25%	0.0691672
MAJIQ	AltEx	simpleASEs	covall	PSI	>25%	0.0633173
MISO	AltEx	simpleASEs	covall	PSI	<1%	0.116999
MISO	AltEx	simpleASEs	covall	PSI	1-5%	0.288713
MISO	AltEx	simpleASEs	covall	PSI	5-10%	0.13627
MISO	AltEx	simpleASEs	covall	PSI	10-25%	0.21989
MISO	AltEx	simpleASEs	covall	PSI	>25%	0.238128
rMATS	AltEx	simpleASEs	covall	PSI	<1%	0.077426
rMATS	AltEx	simpleASEs	covall	PSI	1-5%	0.24914
rMATS	AltEx	simpleASEs	covall	PSI	5-10%	0.218169
rMATS	AltEx	simpleASEs	covall	PSI	10-25%	0.32106
rMATS	AltEx	simpleASEs	covall	PSI	>25%	0.134205
VAST-TOOLS	AltEx	complexASEs	covlow	PSI	<1%	0.14433
VAST-TOOLS	AltEx	complexASEs	covlow	PSI	1-5%	0.402062
VAST-TOOLS	AltEx	complexASEs	covlow	PSI	5-10%	0.195876
VAST-TOOLS	AltEx	complexASEs	covlow	PSI	10-25%	0.206186
VAST-TOOLS	AltEx	complexASEs	covlow	PSI	>25%	0.0515464
MAJIQ	AltEx	complexASEs	covlow	PSI	<1%	0.113402
MAJIQ	AltEx	complexASEs	covlow	PSI	1-5%	0.340206
MAJIQ	AltEx	complexASEs	covlow	PSI	5-10%	0.247423
MAJIQ	AltEx	complexASEs	covlow	PSI	10-25%	0.175258
MAJIQ	AltEx	complexASEs	covlow	PSI	>25%	0.123711
MISO	AltEx	complexASEs	covlow	PSI	<1%	0.0309278
MISO	AltEx	complexASEs	covlow	PSI	1-5%	0.14433
MISO	AltEx	complexASEs	covlow	PSI	5-10%	0.28866
MISO	AltEx	complexASEs	covlow	PSI	10-25%	0.28866
MISO	AltEx	complexASEs	covlow	PSI	>25%	0.247423
rMATS	AltEx	complexASEs	covlow	PSI	<1%	0.0412371
rMATS	AltEx	complexASEs	covlow	PSI	1-5%	0.226804
rMATS	AltEx	complexASEs	covlow	PSI	5-10%	0.226804
rMATS	AltEx	complexASEs	covlow	PSI	10-25%	0.360825
rMATS	AltEx	complexASEs	covlow	PSI	>25%	0.14433
VAST-TOOLS	AltEx	complexASEs	covhigh	PSI	<1%	0.163421
VAST-TOOLS	AltEx	complexASEs	covhigh	PSI	1-5%	0.396274
VAST-TOOLS	AltEx	complexASEs	covhigh	PSI	5-10%	0.190517
VAST-TOOLS	AltEx	complexASEs	covhigh	PSI	10-25%	0.190517
VAST-TOOLS	AltEx	complexASEs	covhigh	PSI	>25%	0.0592718
MAJIQ	AltEx	complexASEs	covhigh	PSI	<1%	0.151566
MAJIQ	AltEx	complexASEs	covhigh	PSI	1-5%	0.429297
MAJIQ	AltEx	complexASEs	covhigh	PSI	5-10%	0.187976
MAJIQ	AltEx	complexASEs	covhigh	PSI	10-25%	0.165114
MAJIQ	AltEx	complexASEs	covhigh	PSI	>25%	0.0660457
MISO	AltEx	complexASEs	covhigh	PSI	<1%	0.088061
MISO	AltEx	complexASEs	covhigh	PSI	1-5%	0.234547
MISO	AltEx	complexASEs	covhigh	PSI	5-10%	0.196444
MISO	AltEx	complexASEs	covhigh	PSI	10-25%	0.264183
MISO	AltEx	complexASEs	covhigh	PSI	>25%	0.216765
rMATS	AltEx	complexASEs	covhigh	PSI	<1%	0.0821338
rMATS	AltEx	complexASEs	covhigh	PSI	1-5%	0.243014
rMATS	AltEx	complexASEs	covhigh	PSI	5-10%	0.199831
rMATS	AltEx	complexASEs	covhigh	PSI	10-25%	0.333616
rMATS	AltEx	complexASEs	covhigh	PSI	>25%	0.141406
VAST-TOOLS	AltEx	complexASEs	covall	PSI	<1%	0.161972
VAST-TOOLS	AltEx	complexASEs	covall	PSI	1-5%	0.396714
VAST-TOOLS	AltEx	complexASEs	covall	PSI	5-10%	0.190923
VAST-TOOLS	AltEx	complexASEs	covall	PSI	10-25%	0.191706
VAST-TOOLS	AltEx	complexASEs	covall	PSI	>25%	0.0586854
MAJIQ	AltEx	complexASEs	covall	PSI	<1%	0.14867
MAJIQ	AltEx	complexASEs	covall	PSI	1-5%	0.422535
MAJIQ	AltEx	complexASEs	covall	PSI	5-10%	0.192488
MAJIQ	AltEx	complexASEs	covall	PSI	10-25%	0.165884
MAJIQ	AltEx	complexASEs	covall	PSI	>25%	0.0704225
MISO	AltEx	complexASEs	covall	PSI	<1%	0.0837246
MISO	AltEx	complexASEs	covall	PSI	1-5%	0.2277
MISO	AltEx	complexASEs	covall	PSI	5-10%	0.203443
MISO	AltEx	complexASEs	covall	PSI	10-25%	0.266041
MISO	AltEx	complexASEs	covall	PSI	>25%	0.219092
rMATS	AltEx	complexASEs	covall	PSI	<1%	0.0790297
rMATS	AltEx	complexASEs	covall	PSI	1-5%	0.241784
rMATS	AltEx	complexASEs	covall	PSI	5-10%	0.201878
rMATS	AltEx	complexASEs	covall	PSI	10-25%	0.335681
rMATS	AltEx	complexASEs	covall	PSI	>25%	0.141628
VAST-TOOLS	AltEx	simpleAndcomplexASEs	covlow	PSI	<1%	0.18799
VAST-TOOLS	AltEx	simpleAndcomplexASEs	covlow	PSI	1-5%	0.454308
VAST-TOOLS	AltEx	simpleAndcomplexASEs	covlow	PSI	5-10%	0.208877
VAST-TOOLS	AltEx	simpleAndcomplexASEs	covlow	PSI	10-25%	0.114883
VAST-TOOLS	AltEx	simpleAndcomplexASEs	covlow	PSI	>25%	0.0339426
MAJIQ	AltEx	simpleAndcomplexASEs	covlow	PSI	<1%	0.190601
MAJIQ	AltEx	simpleAndcomplexASEs	covlow	PSI	1-5%	0.420366
MAJIQ	AltEx	simpleAndcomplexASEs	covlow	PSI	5-10%	0.180157
MAJIQ	AltEx	simpleAndcomplexASEs	covlow	PSI	10-25%	0.117493
MAJIQ	AltEx	simpleAndcomplexASEs	covlow	PSI	>25%	0.0913838
MISO	AltEx	simpleAndcomplexASEs	covlow	PSI	<1%	0.114883
MISO	AltEx	simpleAndcomplexASEs	covlow	PSI	1-5%	0.281984
MISO	AltEx	simpleAndcomplexASEs	covlow	PSI	5-10%	0.185379
MISO	AltEx	simpleAndcomplexASEs	covlow	PSI	10-25%	0.234987
MISO	AltEx	simpleAndcomplexASEs	covlow	PSI	>25%	0.182768
rMATS	AltEx	simpleAndcomplexASEs	covlow	PSI	<1%	0.0835509
rMATS	AltEx	simpleAndcomplexASEs	covlow	PSI	1-5%	0.255875
rMATS	AltEx	simpleAndcomplexASEs	covlow	PSI	5-10%	0.219321
rMATS	AltEx	simpleAndcomplexASEs	covlow	PSI	10-25%	0.29765
rMATS	AltEx	simpleAndcomplexASEs	covlow	PSI	>25%	0.143603
VAST-TOOLS	AltEx	simpleAndcomplexASEs	covhigh	PSI	<1%	0.240726
VAST-TOOLS	AltEx	simpleAndcomplexASEs	covhigh	PSI	1-5%	0.429624
VAST-TOOLS	AltEx	simpleAndcomplexASEs	covhigh	PSI	5-10%	0.155485
VAST-TOOLS	AltEx	simpleAndcomplexASEs	covhigh	PSI	10-25%	0.126809
VAST-TOOLS	AltEx	simpleAndcomplexASEs	covhigh	PSI	>25%	0.047356
MAJIQ	AltEx	simpleAndcomplexASEs	covhigh	PSI	<1%	0.214154
MAJIQ	AltEx	simpleAndcomplexASEs	covhigh	PSI	1-5%	0.499079
MAJIQ	AltEx	simpleAndcomplexASEs	covhigh	PSI	5-10%	0.127072
MAJIQ	AltEx	simpleAndcomplexASEs	covhigh	PSI	10-25%	0.0968166
MAJIQ	AltEx	simpleAndcomplexASEs	covhigh	PSI	>25%	0.0628782
MISO	AltEx	simpleAndcomplexASEs	covhigh	PSI	<1%	0.106025
MISO	AltEx	simpleAndcomplexASEs	covhigh	PSI	1-5%	0.268877
MISO	AltEx	simpleAndcomplexASEs	covhigh	PSI	5-10%	0.153907
MISO	AltEx	simpleAndcomplexASEs	covhigh	PSI	10-25%	0.233886
MISO	AltEx	simpleAndcomplexASEs	covhigh	PSI	>25%	0.237306
rMATS	AltEx	simpleAndcomplexASEs	covhigh	PSI	<1%	0.0773481
rMATS	AltEx	simpleAndcomplexASEs	covhigh	PSI	1-5%	0.245988
rMATS	AltEx	simpleAndcomplexASEs	covhigh	PSI	5-10%	0.212576
rMATS	AltEx	simpleAndcomplexASEs	covhigh	PSI	10-25%	0.328335
rMATS	AltEx	simpleAndcomplexASEs	covhigh	PSI	>25%	0.135754
VAST-TOOLS	AltEx	simpleAndcomplexASEs	covall	PSI	<1%	0.235899
VAST-TOOLS	AltEx	simpleAndcomplexASEs	covall	PSI	1-5%	0.431883
VAST-TOOLS	AltEx	simpleAndcomplexASEs	covall	PSI	5-10%	0.160373
VAST-TOOLS	AltEx	simpleAndcomplexASEs	covall	PSI	10-25%	0.125717
VAST-TOOLS	AltEx	simpleAndcomplexASEs	covall	PSI	>25%	0.0461281
MAJIQ	AltEx	simpleAndcomplexASEs	covall	PSI	<1%	0.211998
MAJIQ	AltEx	simpleAndcomplexASEs	covall	PSI	1-5%	0.491874
MAJIQ	AltEx	simpleAndcomplexASEs	covall	PSI	5-10%	0.131931
MAJIQ	AltEx	simpleAndcomplexASEs	covall	PSI	10-25%	0.0987094
MAJIQ	AltEx	simpleAndcomplexASEs	covall	PSI	>25%	0.0654876
MISO	AltEx	simpleAndcomplexASEs	covall	PSI	<1%	0.106836
MISO	AltEx	simpleAndcomplexASEs	covall	PSI	1-5%	0.270076
MISO	AltEx	simpleAndcomplexASEs	covall	PSI	5-10%	0.156788
MISO	AltEx	simpleAndcomplexASEs	covall	PSI	10-25%	0.233987
MISO	AltEx	simpleAndcomplexASEs	covall	PSI	>25%	0.232314
rMATS	AltEx	simpleAndcomplexASEs	covall	PSI	<1%	0.0779159
rMATS	AltEx	simpleAndcomplexASEs	covall	PSI	1-5%	0.246893
rMATS	AltEx	simpleAndcomplexASEs	covall	PSI	5-10%	0.213193
rMATS	AltEx	simpleAndcomplexASEs	covall	PSI	10-25%	0.325526
rMATS	AltEx	simpleAndcomplexASEs	covall	PSI	>25%	0.136472
VAST-TOOLS	AltEx	simpleASEs	covlow	dPSI	<1%	0.137931
VAST-TOOLS	AltEx	simpleASEs	covlow	dPSI	1-5%	0.517241
VAST-TOOLS	AltEx	simpleASEs	covlow	dPSI	5-10%	0.247126
VAST-TOOLS	AltEx	simpleASEs	covlow	dPSI	10-25%	0.0862069
VAST-TOOLS	AltEx	simpleASEs	covlow	dPSI	>25%	0.0114943
MAJIQ	AltEx	simpleASEs	covlow	dPSI	<1%	0.166667
MAJIQ	AltEx	simpleASEs	covlow	dPSI	1-5%	0.37931
MAJIQ	AltEx	simpleASEs	covlow	dPSI	5-10%	0.206897
MAJIQ	AltEx	simpleASEs	covlow	dPSI	10-25%	0.201149
MAJIQ	AltEx	simpleASEs	covlow	dPSI	>25%	0.045977
MISO	AltEx	simpleASEs	covlow	dPSI	<1%	0.126437
MISO	AltEx	simpleASEs	covlow	dPSI	1-5%	0.298851
MISO	AltEx	simpleASEs	covlow	dPSI	5-10%	0.212644
MISO	AltEx	simpleASEs	covlow	dPSI	10-25%	0.201149
MISO	AltEx	simpleASEs	covlow	dPSI	>25%	0.16092
rMATS	AltEx	simpleASEs	covlow	dPSI	<1%	0.0632184
rMATS	AltEx	simpleASEs	covlow	dPSI	1-5%	0.316092
rMATS	AltEx	simpleASEs	covlow	dPSI	5-10%	0.224138
rMATS	AltEx	simpleASEs	covlow	dPSI	10-25%	0.321839
rMATS	AltEx	simpleASEs	covlow	dPSI	>25%	0.0747126
VAST-TOOLS	AltEx	simpleASEs	covhigh	dPSI	<1%	0.303362
VAST-TOOLS	AltEx	simpleASEs	covhigh	dPSI	1-5%	0.498827
VAST-TOOLS	AltEx	simpleASEs	covhigh	dPSI	5-10%	0.116497
VAST-TOOLS	AltEx	simpleASEs	covhigh	dPSI	10-25%	0.0648944
VAST-TOOLS	AltEx	simpleASEs	covhigh	dPSI	>25%	0.0164191
MAJIQ	AltEx	simpleASEs	covhigh	dPSI	<1%	0.227522
MAJIQ	AltEx	simpleASEs	covhigh	dPSI	1-5%	0.501173
MAJIQ	AltEx	simpleASEs	covhigh	dPSI	5-10%	0.164973
MAJIQ	AltEx	simpleASEs	covhigh	dPSI	10-25%	0.0695856
MAJIQ	AltEx	simpleASEs	covhigh	dPSI	>25%	0.0367475
MISO	AltEx	simpleASEs	covhigh	dPSI	<1%	0.139953
MISO	AltEx	simpleASEs	covhigh	dPSI	1-5%	0.317435
MISO	AltEx	simpleASEs	covhigh	dPSI	5-10%	0.172791
MISO	AltEx	simpleASEs	covhigh	dPSI	10-25%	0.200156
MISO	AltEx	simpleASEs	covhigh	dPSI	>25%	0.169664
rMATS	AltEx	simpleASEs	covhigh	dPSI	<1%	0.128225
rMATS	AltEx	simpleASEs	covhigh	dPSI	1-5%	0.349492
rMATS	AltEx	simpleASEs	covhigh	dPSI	5-10%	0.231431
rMATS	AltEx	simpleASEs	covhigh	dPSI	10-25%	0.224394
rMATS	AltEx	simpleASEs	covhigh	dPSI	>25%	0.0664582
VAST-TOOLS	AltEx	simpleASEs	covall	dPSI	<1%	0.283551
VAST-TOOLS	AltEx	simpleASEs	covall	dPSI	1-5%	0.501032
VAST-TOOLS	AltEx	simpleASEs	covall	dPSI	5-10%	0.13214
VAST-TOOLS	AltEx	simpleASEs	covall	dPSI	10-25%	0.0674467
VAST-TOOLS	AltEx	simpleASEs	covall	dPSI	>25%	0.0158293
MAJIQ	AltEx	simpleASEs	covall	dPSI	<1%	0.220234
MAJIQ	AltEx	simpleASEs	covall	dPSI	1-5%	0.486579
MAJIQ	AltEx	simpleASEs	covall	dPSI	5-10%	0.169993
MAJIQ	AltEx	simpleASEs	covall	dPSI	10-25%	0.0853407
MAJIQ	AltEx	simpleASEs	covall	dPSI	>25%	0.0378527
MISO	AltEx	simpleASEs	covall	dPSI	<1%	0.138334
MISO	AltEx	simpleASEs	covall	dPSI	1-5%	0.31521
MISO	AltEx	simpleASEs	covall	dPSI	5-10%	0.177564
MISO	AltEx	simpleASEs	covall	dPSI	10-25%	0.200275
MISO	AltEx	simpleASEs	covall	dPSI	>25%	0.168617
rMATS	AltEx	simpleASEs	covall	dPSI	<1%	0.12044
rMATS	AltEx	simpleASEs	covall	dPSI	1-5%	0.345492
rMATS	AltEx	simpleASEs	covall	dPSI	5-10%	0.230557
rMATS	AltEx	simpleASEs	covall	dPSI	10-25%	0.236063
rMATS	AltEx	simpleASEs	covall	dPSI	>25%	0.0674467
VAST-TOOLS	AltEx	complexASEs	covlow	dPSI	<1%	0.137931
VAST-TOOLS	AltEx	complexASEs	covlow	dPSI	1-5%	0.293103
VAST-TOOLS	AltEx	complexASEs	covlow	dPSI	5-10%	0.293103
VAST-TOOLS	AltEx	complexASEs	covlow	dPSI	10-25%	0.258621
VAST-TOOLS	AltEx	complexASEs	covlow	dPSI	>25%	0.0172414
MAJIQ	AltEx	complexASEs	covlow	dPSI	<1%	0.137931
MAJIQ	AltEx	complexASEs	covlow	dPSI	1-5%	0.362069
MAJIQ	AltEx	complexASEs	covlow	dPSI	5-10%	0.206897
MAJIQ	AltEx	complexASEs	covlow	dPSI	10-25%	0.189655
MAJIQ	AltEx	complexASEs	covlow	dPSI	>25%	0.103448
MISO	AltEx	complexASEs	covlow	dPSI	<1%	0.0344828
MISO	AltEx	complexASEs	covlow	dPSI	1-5%	0.241379
MISO	AltEx	complexASEs	covlow	dPSI	5-10%	0.189655
MISO	AltEx	complexASEs	covlow	dPSI	10-25%	0.275862
MISO	AltEx	complexASEs	covlow	dPSI	>25%	0.258621
rMATS	AltEx	complexASEs	covlow	dPSI	<1%	0.12069
rMATS	AltEx	complexASEs	covlow	dPSI	1-5%	0.224138
rMATS	AltEx	complexASEs	covlow	dPSI	5-10%	0.224138
rMATS	AltEx	complexASEs	covlow	dPSI	10-25%	0.275862
rMATS	AltEx	complexASEs	covlow	dPSI	>25%	0.155172
VAST-TOOLS	AltEx	complexASEs	covhigh	dPSI	<1%	0.208262
VAST-TOOLS	AltEx	complexASEs	covhigh	dPSI	1-5%	0.459552
VAST-TOOLS	AltEx	complexASEs	covhigh	dPSI	5-10%	0.158348
VAST-TOOLS	AltEx	complexASEs	covhigh	dPSI	10-25%	0.144578
VAST-TOOLS	AltEx	complexASEs	covhigh	dPSI	>25%	0.0292599
MAJIQ	AltEx	complexASEs	covhigh	dPSI	<1%	0.194492
MAJIQ	AltEx	complexASEs	covhigh	dPSI	1-5%	0.445783
MAJIQ	AltEx	complexASEs	covhigh	dPSI	5-10%	0.179002
MAJIQ	AltEx	complexASEs	covhigh	dPSI	10-25%	0.144578
MAJIQ	AltEx	complexASEs	covhigh	dPSI	>25%	0.0361446
MISO	AltEx	complexASEs	covhigh	dPSI	<1%	0.108434
MISO	AltEx	complexASEs	covhigh	dPSI	1-5%	0.296041
MISO	AltEx	complexASEs	covhigh	dPSI	5-10%	0.222031
MISO	AltEx	complexASEs	covhigh	dPSI	10-25%	0.266781
MISO	AltEx	complexASEs	covhigh	dPSI	>25%	0.106713
rMATS	AltEx	complexASEs	covhigh	dPSI	<1%	0.0929432
rMATS	AltEx	complexASEs	covhigh	dPSI	1-5%	0.339071
rMATS	AltEx	complexASEs	covhigh	dPSI	5-10%	0.24957
rMATS	AltEx	complexASEs	covhigh	dPSI	10-25%	0.261618
rMATS	AltEx	complexASEs	covhigh	dPSI	>25%	0.0567986
VAST-TOOLS	AltEx	complexASEs	covall	dPSI	<1%	0.201878
VAST-TOOLS	AltEx	complexASEs	covall	dPSI	1-5%	0.444444
VAST-TOOLS	AltEx	complexASEs	covall	dPSI	5-10%	0.170579
VAST-TOOLS	AltEx	complexASEs	covall	dPSI	10-25%	0.15493
VAST-TOOLS	AltEx	complexASEs	covall	dPSI	>25%	0.028169
MAJIQ	AltEx	complexASEs	covall	dPSI	<1%	0.189358
MAJIQ	AltEx	complexASEs	covall	dPSI	1-5%	0.438185
MAJIQ	AltEx	complexASEs	covall	dPSI	5-10%	0.181534
MAJIQ	AltEx	complexASEs	covall	dPSI	10-25%	0.14867
MAJIQ	AltEx	complexASEs	covall	dPSI	>25%	0.0422535
MISO	AltEx	complexASEs	covall	dPSI	<1%	0.101721
MISO	AltEx	complexASEs	covall	dPSI	1-5%	0.29108
MISO	AltEx	complexASEs	covall	dPSI	5-10%	0.219092
MISO	AltEx	complexASEs	covall	dPSI	10-25%	0.267606
MISO	AltEx	complexASEs	covall	dPSI	>25%	0.120501
rMATS	AltEx	complexASEs	covall	dPSI	<1%	0.0954617
rMATS	AltEx	complexASEs	covall	dPSI	1-5%	0.328638
rMATS	AltEx	complexASEs	covall	dPSI	5-10%	0.247261
rMATS	AltEx	complexASEs	covall	dPSI	10-25%	0.262911
rMATS	AltEx	complexASEs	covall	dPSI	>25%	0.0657277
VAST-TOOLS	AltEx	simpleAndcomplexASEs	covlow	dPSI	<1%	0.137931
VAST-TOOLS	AltEx	simpleAndcomplexASEs	covlow	dPSI	1-5%	0.461207
VAST-TOOLS	AltEx	simpleAndcomplexASEs	covlow	dPSI	5-10%	0.258621
VAST-TOOLS	AltEx	simpleAndcomplexASEs	covlow	dPSI	10-25%	0.12931
VAST-TOOLS	AltEx	simpleAndcomplexASEs	covlow	dPSI	>25%	0.012931
MAJIQ	AltEx	simpleAndcomplexASEs	covlow	dPSI	<1%	0.159483
MAJIQ	AltEx	simpleAndcomplexASEs	covlow	dPSI	1-5%	0.375
MAJIQ	AltEx	simpleAndcomplexASEs	covlow	dPSI	5-10%	0.206897
MAJIQ	AltEx	simpleAndcomplexASEs	covlow	dPSI	10-25%	0.198276
MAJIQ	AltEx	simpleAndcomplexASEs	covlow	dPSI	>25%	0.0603448
MISO	AltEx	simpleAndcomplexASEs	covlow	dPSI	<1%	0.103448
MISO	AltEx	simpleAndcomplexASEs	covlow	dPSI	1-5%	0.284483
MISO	AltEx	simpleAndcomplexASEs	covlow	dPSI	5-10%	0.206897
MISO	AltEx	simpleAndcomplexASEs	covlow	dPSI	10-25%	0.219828
MISO	AltEx	simpleAndcomplexASEs	covlow	dPSI	>25%	0.185345
rMATS	AltEx	simpleAndcomplexASEs	covlow	dPSI	<1%	0.0775862
rMATS	AltEx	simpleAndcomplexASEs	covlow	dPSI	1-5%	0.293103
rMATS	AltEx	simpleAndcomplexASEs	covlow	dPSI	5-10%	0.224138
rMATS	AltEx	simpleAndcomplexASEs	covlow	dPSI	10-25%	0.310345
rMATS	AltEx	simpleAndcomplexASEs	covlow	dPSI	>25%	0.0948276
VAST-TOOLS	AltEx	simpleAndcomplexASEs	covhigh	dPSI	<1%	0.273656
VAST-TOOLS	AltEx	simpleAndcomplexASEs	covhigh	dPSI	1-5%	0.486559
VAST-TOOLS	AltEx	simpleAndcomplexASEs	covhigh	dPSI	5-10%	0.12957
VAST-TOOLS	AltEx	simpleAndcomplexASEs	covhigh	dPSI	10-25%	0.0897849
VAST-TOOLS	AltEx	simpleAndcomplexASEs	covhigh	dPSI	>25%	0.0204301
MAJIQ	AltEx	simpleAndcomplexASEs	covhigh	dPSI	<1%	0.217204
MAJIQ	AltEx	simpleAndcomplexASEs	covhigh	dPSI	1-5%	0.483871
MAJIQ	AltEx	simpleAndcomplexASEs	covhigh	dPSI	5-10%	0.169355
MAJIQ	AltEx	simpleAndcomplexASEs	covhigh	dPSI	10-25%	0.0930108
MAJIQ	AltEx	simpleAndcomplexASEs	covhigh	dPSI	>25%	0.0365591
MISO	AltEx	simpleAndcomplexASEs	covhigh	dPSI	<1%	0.130108
MISO	AltEx	simpleAndcomplexASEs	covhigh	dPSI	1-5%	0.310753
MISO	AltEx	simpleAndcomplexASEs	covhigh	dPSI	5-10%	0.188172
MISO	AltEx	simpleAndcomplexASEs	covhigh	dPSI	10-25%	0.220968
MISO	AltEx	simpleAndcomplexASEs	covhigh	dPSI	>25%	0.15
rMATS	AltEx	simpleAndcomplexASEs	covhigh	dPSI	<1%	0.117204
rMATS	AltEx	simpleAndcomplexASEs	covhigh	dPSI	1-5%	0.346237
rMATS	AltEx	simpleAndcomplexASEs	covhigh	dPSI	5-10%	0.237097
rMATS	AltEx	simpleAndcomplexASEs	covhigh	dPSI	10-25%	0.236022
rMATS	AltEx	simpleAndcomplexASEs	covhigh	dPSI	>25%	0.0634409
VAST-TOOLS	AltEx	simpleAndcomplexASEs	covall	dPSI	<1%	0.258604
VAST-TOOLS	AltEx	simpleAndcomplexASEs	covall	dPSI	1-5%	0.483748
VAST-TOOLS	AltEx	simpleAndcomplexASEs	covall	dPSI	5-10%	0.143881
VAST-TOOLS	AltEx	simpleAndcomplexASEs	covall	dPSI	10-25%	0.0941683
VAST-TOOLS	AltEx	simpleAndcomplexASEs	covall	dPSI	>25%	0.0195985
MAJIQ	AltEx	simpleAndcomplexASEs	covall	dPSI	<1%	0.210803
MAJIQ	AltEx	simpleAndcomplexASEs	covall	dPSI	1-5%	0.471797
MAJIQ	AltEx	simpleAndcomplexASEs	covall	dPSI	5-10%	0.173518
MAJIQ	AltEx	simpleAndcomplexASEs	covall	dPSI	10-25%	0.104685
MAJIQ	AltEx	simpleAndcomplexASEs	covall	dPSI	>25%	0.0391969
MISO	AltEx	simpleAndcomplexASEs	covall	dPSI	<1%	0.127151
MISO	AltEx	simpleAndcomplexASEs	covall	dPSI	1-5%	0.307839
MISO	AltEx	simpleAndcomplexASEs	covall	dPSI	5-10%	0.190249
MISO	AltEx	simpleAndcomplexASEs	covall	dPSI	10-25%	0.220841
MISO	AltEx	simpleAndcomplexASEs	covall	dPSI	>25%	0.15392
rMATS	AltEx	simpleAndcomplexASEs	covall	dPSI	<1%	0.112811
rMATS	AltEx	simpleAndcomplexASEs	covall	dPSI	1-5%	0.340344
rMATS	AltEx	simpleAndcomplexASEs	covall	dPSI	5-10%	0.23566
rMATS	AltEx	simpleAndcomplexASEs	covall	dPSI	10-25%	0.244264
rMATS	AltEx	simpleAndcomplexASEs	covall	dPSI	>25%	0.0669216
VAST-TOOLS	Alt3	simpleASEs	covlow	PSI	<1%	0.103448
VAST-TOOLS	Alt3	simpleASEs	covlow	PSI	1-5%	0.724138
VAST-TOOLS	Alt3	simpleASEs	covlow	PSI	5-10%	0.103448
VAST-TOOLS	Alt3	simpleASEs	covlow	PSI	10-25%	0.0344828
VAST-TOOLS	Alt3	simpleASEs	covlow	PSI	>25%	0.0344828
MAJIQ	Alt3	simpleASEs	covlow	PSI	<1%	0.137931
MAJIQ	Alt3	simpleASEs	covlow	PSI	1-5%	0.448276
MAJIQ	Alt3	simpleASEs	covlow	PSI	5-10%	0.241379
MAJIQ	Alt3	simpleASEs	covlow	PSI	10-25%	0.103448
MAJIQ	Alt3	simpleASEs	covlow	PSI	>25%	0.0689655
MISO	Alt3	simpleASEs	covlow	PSI	<1%	0.0689655
MISO	Alt3	simpleASEs	covlow	PSI	1-5%	0.103448
MISO	Alt3	simpleASEs	covlow	PSI	5-10%	0.241379
MISO	Alt3	simpleASEs	covlow	PSI	10-25%	0.137931
MISO	Alt3	simpleASEs	covlow	PSI	>25%	0.448276
rMATS	Alt3	simpleASEs	covlow	PSI	<1%	0.172414
rMATS	Alt3	simpleASEs	covlow	PSI	1-5%	0.344828
rMATS	Alt3	simpleASEs	covlow	PSI	5-10%	0.172414
rMATS	Alt3	simpleASEs	covlow	PSI	10-25%	0.137931
rMATS	Alt3	simpleASEs	covlow	PSI	>25%	0.172414
VAST-TOOLS	Alt3	simpleASEs	covhigh	PSI	<1%	0.364829
VAST-TOOLS	Alt3	simpleASEs	covhigh	PSI	1-5%	0.471129
VAST-TOOLS	Alt3	simpleASEs	covhigh	PSI	5-10%	0.0800525
VAST-TOOLS	Alt3	simpleASEs	covhigh	PSI	10-25%	0.0472441
VAST-TOOLS	Alt3	simpleASEs	covhigh	PSI	>25%	0.0367454
MAJIQ	Alt3	simpleASEs	covhigh	PSI	<1%	0.19685
MAJIQ	Alt3	simpleASEs	covhigh	PSI	1-5%	0.560367
MAJIQ	Alt3	simpleASEs	covhigh	PSI	5-10%	0.129921
MAJIQ	Alt3	simpleASEs	covhigh	PSI	10-25%	0.0643045
MAJIQ	Alt3	simpleASEs	covhigh	PSI	>25%	0.0485564
MISO	Alt3	simpleASEs	covhigh	PSI	<1%	0.0669291
MISO	Alt3	simpleASEs	covhigh	PSI	1-5%	0.160105
MISO	Alt3	simpleASEs	covhigh	PSI	5-10%	0.124672
MISO	Alt3	simpleASEs	covhigh	PSI	10-25%	0.190289
MISO	Alt3	simpleASEs	covhigh	PSI	>25%	0.458005
rMATS	Alt3	simpleASEs	covhigh	PSI	<1%	0.216535
rMATS	Alt3	simpleASEs	covhigh	PSI	1-5%	0.419948
rMATS	Alt3	simpleASEs	covhigh	PSI	5-10%	0.154856
rMATS	Alt3	simpleASEs	covhigh	PSI	10-25%	0.141732
rMATS	Alt3	simpleASEs	covhigh	PSI	>25%	0.0669291
VAST-TOOLS	Alt3	simpleASEs	covall	PSI	<1%	0.346341
VAST-TOOLS	Alt3	simpleASEs	covall	PSI	1-5%	0.489024
VAST-TOOLS	Alt3	simpleASEs	covall	PSI	5-10%	0.0817073
VAST-TOOLS	Alt3	simpleASEs	covall	PSI	10-25%	0.0463415
VAST-TOOLS	Alt3	simpleASEs	covall	PSI	>25%	0.0365854
MAJIQ	Alt3	simpleASEs	covall	PSI	<1%	0.192683
MAJIQ	Alt3	simpleASEs	covall	PSI	1-5%	0.552439
MAJIQ	Alt3	simpleASEs	covall	PSI	5-10%	0.137805
MAJIQ	Alt3	simpleASEs	covall	PSI	10-25%	0.0670732
MAJIQ	Alt3	simpleASEs	covall	PSI	>25%	0.05
MISO	Alt3	simpleASEs	covall	PSI	<1%	0.0670732
MISO	Alt3	simpleASEs	covall	PSI	1-5%	0.156098
MISO	Alt3	simpleASEs	covall	PSI	5-10%	0.132927
MISO	Alt3	simpleASEs	covall	PSI	10-25%	0.186585
MISO	Alt3	simpleASEs	covall	PSI	>25%	0.457317
rMATS	Alt3	simpleASEs	covall	PSI	<1%	0.213415
rMATS	Alt3	simpleASEs	covall	PSI	1-5%	0.414634
rMATS	Alt3	simpleASEs	covall	PSI	5-10%	0.156098
rMATS	Alt3	simpleASEs	covall	PSI	10-25%	0.141463
rMATS	Alt3	simpleASEs	covall	PSI	>25%	0.0743902
VAST-TOOLS	Alt3	complexASEs	covlow	PSI	<1%	0.153846
VAST-TOOLS	Alt3	complexASEs	covlow	PSI	1-5%	0.384615
VAST-TOOLS	Alt3	complexASEs	covlow	PSI	5-10%	0.461538
VAST-TOOLS	Alt3	complexASEs	covlow	PSI	10-25%	0
VAST-TOOLS	Alt3	complexASEs	covlow	PSI	>25%	0
MAJIQ	Alt3	complexASEs	covlow	PSI	<1%	0.307692
MAJIQ	Alt3	complexASEs	covlow	PSI	1-5%	0.461538
MAJIQ	Alt3	complexASEs	covlow	PSI	5-10%	0.230769
MAJIQ	Alt3	complexASEs	covlow	PSI	10-25%	0
MAJIQ	Alt3	complexASEs	covlow	PSI	>25%	0
MISO	Alt3	complexASEs	covlow	PSI	<1%	0
MISO	Alt3	complexASEs	covlow	PSI	1-5%	0.230769
MISO	Alt3	complexASEs	covlow	PSI	5-10%	0.153846
MISO	Alt3	complexASEs	covlow	PSI	10-25%	0.307692
MISO	Alt3	complexASEs	covlow	PSI	>25%	0.307692
rMATS	Alt3	complexASEs	covlow	PSI	<1%	0.0769231
rMATS	Alt3	complexASEs	covlow	PSI	1-5%	0.307692
rMATS	Alt3	complexASEs	covlow	PSI	5-10%	0.0769231
rMATS	Alt3	complexASEs	covlow	PSI	10-25%	0.461538
rMATS	Alt3	complexASEs	covlow	PSI	>25%	0.0769231
VAST-TOOLS	Alt3	complexASEs	covhigh	PSI	<1%	0.0612245
VAST-TOOLS	Alt3	complexASEs	covhigh	PSI	1-5%	0.387755
VAST-TOOLS	Alt3	complexASEs	covhigh	PSI	5-10%	0.163265
VAST-TOOLS	Alt3	complexASEs	covhigh	PSI	10-25%	0.142857
VAST-TOOLS	Alt3	complexASEs	covhigh	PSI	>25%	0.244898
MAJIQ	Alt3	complexASEs	covhigh	PSI	<1%	0.122449
MAJIQ	Alt3	complexASEs	covhigh	PSI	1-5%	0.530612
MAJIQ	Alt3	complexASEs	covhigh	PSI	5-10%	0.244898
MAJIQ	Alt3	complexASEs	covhigh	PSI	10-25%	0.0816327
MAJIQ	Alt3	complexASEs	covhigh	PSI	>25%	0.0204082
MISO	Alt3	complexASEs	covhigh	PSI	<1%	0.0612245
MISO	Alt3	complexASEs	covhigh	PSI	1-5%	0.163265
MISO	Alt3	complexASEs	covhigh	PSI	5-10%	0.183673
MISO	Alt3	complexASEs	covhigh	PSI	10-25%	0.244898
MISO	Alt3	complexASEs	covhigh	PSI	>25%	0.346939
rMATS	Alt3	complexASEs	covhigh	PSI	<1%	0.102041
rMATS	Alt3	complexASEs	covhigh	PSI	1-5%	0.204082
rMATS	Alt3	complexASEs	covhigh	PSI	5-10%	0.142857
rMATS	Alt3	complexASEs	covhigh	PSI	10-25%	0.183673
rMATS	Alt3	complexASEs	covhigh	PSI	>25%	0.367347
VAST-TOOLS	Alt3	complexASEs	covall	PSI	<1%	0.0806452
VAST-TOOLS	Alt3	complexASEs	covall	PSI	1-5%	0.387097
VAST-TOOLS	Alt3	complexASEs	covall	PSI	5-10%	0.225806
VAST-TOOLS	Alt3	complexASEs	covall	PSI	10-25%	0.112903
VAST-TOOLS	Alt3	complexASEs	covall	PSI	>25%	0.193548
MAJIQ	Alt3	complexASEs	covall	PSI	<1%	0.16129
MAJIQ	Alt3	complexASEs	covall	PSI	1-5%	0.516129
MAJIQ	Alt3	complexASEs	covall	PSI	5-10%	0.241935
MAJIQ	Alt3	complexASEs	covall	PSI	10-25%	0.0645161
MAJIQ	Alt3	complexASEs	covall	PSI	>25%	0.016129
MISO	Alt3	complexASEs	covall	PSI	<1%	0.0483871
MISO	Alt3	complexASEs	covall	PSI	1-5%	0.177419
MISO	Alt3	complexASEs	covall	PSI	5-10%	0.177419
MISO	Alt3	complexASEs	covall	PSI	10-25%	0.258065
MISO	Alt3	complexASEs	covall	PSI	>25%	0.33871
rMATS	Alt3	complexASEs	covall	PSI	<1%	0.0967742
rMATS	Alt3	complexASEs	covall	PSI	1-5%	0.225806
rMATS	Alt3	complexASEs	covall	PSI	5-10%	0.129032
rMATS	Alt3	complexASEs	covall	PSI	10-25%	0.241935
rMATS	Alt3	complexASEs	covall	PSI	>25%	0.306452
VAST-TOOLS	Alt3	simpleAndcomplexASEs	covlow	PSI	<1%	0.112676
VAST-TOOLS	Alt3	simpleAndcomplexASEs	covlow	PSI	1-5%	0.661972
VAST-TOOLS	Alt3	simpleAndcomplexASEs	covlow	PSI	5-10%	0.169014
VAST-TOOLS	Alt3	simpleAndcomplexASEs	covlow	PSI	10-25%	0.028169
VAST-TOOLS	Alt3	simpleAndcomplexASEs	covlow	PSI	>25%	0.028169
MAJIQ	Alt3	simpleAndcomplexASEs	covlow	PSI	<1%	0.169014
MAJIQ	Alt3	simpleAndcomplexASEs	covlow	PSI	1-5%	0.450704
MAJIQ	Alt3	simpleAndcomplexASEs	covlow	PSI	5-10%	0.239437
MAJIQ	Alt3	simpleAndcomplexASEs	covlow	PSI	10-25%	0.084507
MAJIQ	Alt3	simpleAndcomplexASEs	covlow	PSI	>25%	0.056338
MISO	Alt3	simpleAndcomplexASEs	covlow	PSI	<1%	0.056338
MISO	Alt3	simpleAndcomplexASEs	covlow	PSI	1-5%	0.126761
MISO	Alt3	simpleAndcomplexASEs	covlow	PSI	5-10%	0.225352
MISO	Alt3	simpleAndcomplexASEs	covlow	PSI	10-25%	0.169014
MISO	Alt3	simpleAndcomplexASEs	covlow	PSI	>25%	0.422535
rMATS	Alt3	simpleAndcomplexASEs	covlow	PSI	<1%	0.15493
rMATS	Alt3	simpleAndcomplexASEs	covlow	PSI	1-5%	0.338028
rMATS	Alt3	simpleAndcomplexASEs	covlow	PSI	5-10%	0.15493
rMATS	Alt3	simpleAndcomplexASEs	covlow	PSI	10-25%	0.197183
rMATS	Alt3	simpleAndcomplexASEs	covlow	PSI	>25%	0.15493
VAST-TOOLS	Alt3	simpleAndcomplexASEs	covhigh	PSI	<1%	0.346486
VAST-TOOLS	Alt3	simpleAndcomplexASEs	covhigh	PSI	1-5%	0.466091
VAST-TOOLS	Alt3	simpleAndcomplexASEs	covhigh	PSI	5-10%	0.0850801
VAST-TOOLS	Alt3	simpleAndcomplexASEs	covhigh	PSI	10-25%	0.053021
VAST-TOOLS	Alt3	simpleAndcomplexASEs	covhigh	PSI	>25%	0.0493218
MAJIQ	Alt3	simpleAndcomplexASEs	covhigh	PSI	<1%	0.192355
MAJIQ	Alt3	simpleAndcomplexASEs	covhigh	PSI	1-5%	0.55857
MAJIQ	Alt3	simpleAndcomplexASEs	covhigh	PSI	5-10%	0.136868
MAJIQ	Alt3	simpleAndcomplexASEs	covhigh	PSI	10-25%	0.0653514
MAJIQ	Alt3	simpleAndcomplexASEs	covhigh	PSI	>25%	0.0468557
MISO	Alt3	simpleAndcomplexASEs	covhigh	PSI	<1%	0.0665845
MISO	Alt3	simpleAndcomplexASEs	covhigh	PSI	1-5%	0.160296
MISO	Alt3	simpleAndcomplexASEs	covhigh	PSI	5-10%	0.128237
MISO	Alt3	simpleAndcomplexASEs	covhigh	PSI	10-25%	0.193588
MISO	Alt3	simpleAndcomplexASEs	covhigh	PSI	>25%	0.451295
rMATS	Alt3	simpleAndcomplexASEs	covhigh	PSI	<1%	0.209618
rMATS	Alt3	simpleAndcomplexASEs	covhigh	PSI	1-5%	0.406905
rMATS	Alt3	simpleAndcomplexASEs	covhigh	PSI	5-10%	0.154131
rMATS	Alt3	simpleAndcomplexASEs	covhigh	PSI	10-25%	0.144266
rMATS	Alt3	simpleAndcomplexASEs	covhigh	PSI	>25%	0.0850801
VAST-TOOLS	Alt3	simpleAndcomplexASEs	covall	PSI	<1%	0.327664
VAST-TOOLS	Alt3	simpleAndcomplexASEs	covall	PSI	1-5%	0.481859
VAST-TOOLS	Alt3	simpleAndcomplexASEs	covall	PSI	5-10%	0.0918367
VAST-TOOLS	Alt3	simpleAndcomplexASEs	covall	PSI	10-25%	0.0510204
VAST-TOOLS	Alt3	simpleAndcomplexASEs	covall	PSI	>25%	0.047619
MAJIQ	Alt3	simpleAndcomplexASEs	covall	PSI	<1%	0.190476
MAJIQ	Alt3	simpleAndcomplexASEs	covall	PSI	1-5%	0.549887
MAJIQ	Alt3	simpleAndcomplexASEs	covall	PSI	5-10%	0.145125
MAJIQ	Alt3	simpleAndcomplexASEs	covall	PSI	10-25%	0.0668934
MAJIQ	Alt3	simpleAndcomplexASEs	covall	PSI	>25%	0.047619
MISO	Alt3	simpleAndcomplexASEs	covall	PSI	<1%	0.0657596
MISO	Alt3	simpleAndcomplexASEs	covall	PSI	1-5%	0.157596
MISO	Alt3	simpleAndcomplexASEs	covall	PSI	5-10%	0.136054
MISO	Alt3	simpleAndcomplexASEs	covall	PSI	10-25%	0.19161
MISO	Alt3	simpleAndcomplexASEs	covall	PSI	>25%	0.44898
rMATS	Alt3	simpleAndcomplexASEs	covall	PSI	<1%	0.205215
rMATS	Alt3	simpleAndcomplexASEs	covall	PSI	1-5%	0.401361
rMATS	Alt3	simpleAndcomplexASEs	covall	PSI	5-10%	0.154195
rMATS	Alt3	simpleAndcomplexASEs	covall	PSI	10-25%	0.148526
rMATS	Alt3	simpleAndcomplexASEs	covall	PSI	>25%	0.0907029
VAST-TOOLS	Alt3	simpleASEs	covlow	dPSI	<1%	0.111111
VAST-TOOLS	Alt3	simpleASEs	covlow	dPSI	1-5%	0.388889
VAST-TOOLS	Alt3	simpleASEs	covlow	dPSI	5-10%	0.388889
VAST-TOOLS	Alt3	simpleASEs	covlow	dPSI	10-25%	0.0555556
VAST-TOOLS	Alt3	simpleASEs	covlow	dPSI	>25%	0.0555556
MAJIQ	Alt3	simpleASEs	covlow	dPSI	<1%	0.0555556
MAJIQ	Alt3	simpleASEs	covlow	dPSI	1-5%	0.277778
MAJIQ	Alt3	simpleASEs	covlow	dPSI	5-10%	0.444444
MAJIQ	Alt3	simpleASEs	covlow	dPSI	10-25%	0.166667
MAJIQ	Alt3	simpleASEs	covlow	dPSI	>25%	0.0555556
MISO	Alt3	simpleASEs	covlow	dPSI	<1%	0
MISO	Alt3	simpleASEs	covlow	dPSI	1-5%	0.111111
MISO	Alt3	simpleASEs	covlow	dPSI	5-10%	0.277778
MISO	Alt3	simpleASEs	covlow	dPSI	10-25%	0.222222
MISO	Alt3	simpleASEs	covlow	dPSI	>25%	0.388889
rMATS	Alt3	simpleASEs	covlow	dPSI	<1%	0.222222
rMATS	Alt3	simpleASEs	covlow	dPSI	1-5%	0.388889
rMATS	Alt3	simpleASEs	covlow	dPSI	5-10%	0.222222
rMATS	Alt3	simpleASEs	covlow	dPSI	10-25%	0.111111
rMATS	Alt3	simpleASEs	covlow	dPSI	>25%	0.0555556
VAST-TOOLS	Alt3	simpleASEs	covhigh	dPSI	<1%	0.315508
VAST-TOOLS	Alt3	simpleASEs	covhigh	dPSI	1-5%	0.516043
VAST-TOOLS	Alt3	simpleASEs	covhigh	dPSI	5-10%	0.0909091
VAST-TOOLS	Alt3	simpleASEs	covhigh	dPSI	10-25%	0.0481283
VAST-TOOLS	Alt3	simpleASEs	covhigh	dPSI	>25%	0.0294118
MAJIQ	Alt3	simpleASEs	covhigh	dPSI	<1%	0.179144
MAJIQ	Alt3	simpleASEs	covhigh	dPSI	1-5%	0.497326
MAJIQ	Alt3	simpleASEs	covhigh	dPSI	5-10%	0.219251
MAJIQ	Alt3	simpleASEs	covhigh	dPSI	10-25%	0.0775401
MAJIQ	Alt3	simpleASEs	covhigh	dPSI	>25%	0.026738
MISO	Alt3	simpleASEs	covhigh	dPSI	<1%	0.0962567
MISO	Alt3	simpleASEs	covhigh	dPSI	1-5%	0.203209
MISO	Alt3	simpleASEs	covhigh	dPSI	5-10%	0.144385
MISO	Alt3	simpleASEs	covhigh	dPSI	10-25%	0.221925
MISO	Alt3	simpleASEs	covhigh	dPSI	>25%	0.334225
rMATS	Alt3	simpleASEs	covhigh	dPSI	<1%	0.197861
rMATS	Alt3	simpleASEs	covhigh	dPSI	1-5%	0.430481
rMATS	Alt3	simpleASEs	covhigh	dPSI	5-10%	0.216578
rMATS	Alt3	simpleASEs	covhigh	dPSI	10-25%	0.122995
rMATS	Alt3	simpleASEs	covhigh	dPSI	>25%	0.0320856
VAST-TOOLS	Alt3	simpleASEs	covall	dPSI	<1%	0.297561
VAST-TOOLS	Alt3	simpleASEs	covall	dPSI	1-5%	0.504878
VAST-TOOLS	Alt3	simpleASEs	covall	dPSI	5-10%	0.117073
VAST-TOOLS	Alt3	simpleASEs	covall	dPSI	10-25%	0.0487805
VAST-TOOLS	Alt3	simpleASEs	covall	dPSI	>25%	0.0317073
MAJIQ	Alt3	simpleASEs	covall	dPSI	<1%	0.168293
MAJIQ	Alt3	simpleASEs	covall	dPSI	1-5%	0.478049
MAJIQ	Alt3	simpleASEs	covall	dPSI	5-10%	0.239024
MAJIQ	Alt3	simpleASEs	covall	dPSI	10-25%	0.0853659
MAJIQ	Alt3	simpleASEs	covall	dPSI	>25%	0.0292683
MISO	Alt3	simpleASEs	covall	dPSI	<1%	0.0878049
MISO	Alt3	simpleASEs	covall	dPSI	1-5%	0.195122
MISO	Alt3	simpleASEs	covall	dPSI	5-10%	0.156098
MISO	Alt3	simpleASEs	covall	dPSI	10-25%	0.221951
MISO	Alt3	simpleASEs	covall	dPSI	>25%	0.339024
rMATS	Alt3	simpleASEs	covall	dPSI	<1%	0.2
rMATS	Alt3	simpleASEs	covall	dPSI	1-5%	0.426829
rMATS	Alt3	simpleASEs	covall	dPSI	5-10%	0.217073
rMATS	Alt3	simpleASEs	covall	dPSI	10-25%	0.121951
rMATS	Alt3	simpleASEs	covall	dPSI	>25%	0.0341463
VAST-TOOLS	Alt3	complexASEs	covlow	dPSI	<1%	0.375
VAST-TOOLS	Alt3	complexASEs	covlow	dPSI	1-5%	0.125
VAST-TOOLS	Alt3	complexASEs	covlow	dPSI	5-10%	0.375
VAST-TOOLS	Alt3	complexASEs	covlow	dPSI	10-25%	0.125
VAST-TOOLS	Alt3	complexASEs	covlow	dPSI	>25%	0
MAJIQ	Alt3	complexASEs	covlow	dPSI	<1%	0.125
MAJIQ	Alt3	complexASEs	covlow	dPSI	1-5%	0.125
MAJIQ	Alt3	complexASEs	covlow	dPSI	5-10%	0.375
MAJIQ	Alt3	complexASEs	covlow	dPSI	10-25%	0.375
MAJIQ	Alt3	complexASEs	covlow	dPSI	>25%	0
MISO	Alt3	complexASEs	covlow	dPSI	<1%	0.125
MISO	Alt3	complexASEs	covlow	dPSI	1-5%	0
MISO	Alt3	complexASEs	covlow	dPSI	5-10%	0.25
MISO	Alt3	complexASEs	covlow	dPSI	10-25%	0.375
MISO	Alt3	complexASEs	covlow	dPSI	>25%	0.25
rMATS	Alt3	complexASEs	covlow	dPSI	<1%	0.375
rMATS	Alt3	complexASEs	covlow	dPSI	1-5%	0.375
rMATS	Alt3	complexASEs	covlow	dPSI	5-10%	0
rMATS	Alt3	complexASEs	covlow	dPSI	10-25%	0.25
rMATS	Alt3	complexASEs	covlow	dPSI	>25%	0
VAST-TOOLS	Alt3	complexASEs	covhigh	dPSI	<1%	0.130435
VAST-TOOLS	Alt3	complexASEs	covhigh	dPSI	1-5%	0.26087
VAST-TOOLS	Alt3	complexASEs	covhigh	dPSI	5-10%	0.304348
VAST-TOOLS	Alt3	complexASEs	covhigh	dPSI	10-25%	0.217391
VAST-TOOLS	Alt3	complexASEs	covhigh	dPSI	>25%	0.0869565
MAJIQ	Alt3	complexASEs	covhigh	dPSI	<1%	0.173913
MAJIQ	Alt3	complexASEs	covhigh	dPSI	1-5%	0.347826
MAJIQ	Alt3	complexASEs	covhigh	dPSI	5-10%	0.347826
MAJIQ	Alt3	complexASEs	covhigh	dPSI	10-25%	0.0869565
MAJIQ	Alt3	complexASEs	covhigh	dPSI	>25%	0.0434783
MISO	Alt3	complexASEs	covhigh	dPSI	<1%	0.0434783
MISO	Alt3	complexASEs	covhigh	dPSI	1-5%	0.0869565
MISO	Alt3	complexASEs	covhigh	dPSI	5-10%	0.304348
MISO	Alt3	complexASEs	covhigh	dPSI	10-25%	0.304348
MISO	Alt3	complexASEs	covhigh	dPSI	>25%	0.26087
rMATS	Alt3	complexASEs	covhigh	dPSI	<1%	0.0869565
rMATS	Alt3	complexASEs	covhigh	dPSI	1-5%	0.217391
rMATS	Alt3	complexASEs	covhigh	dPSI	5-10%	0.130435
rMATS	Alt3	complexASEs	covhigh	dPSI	10-25%	0.304348
rMATS	Alt3	complexASEs	covhigh	dPSI	>25%	0.26087
VAST-TOOLS	Alt3	complexASEs	covall	dPSI	<1%	0.193548
VAST-TOOLS	Alt3	complexASEs	covall	dPSI	1-5%	0.225806
VAST-TOOLS	Alt3	complexASEs	covall	dPSI	5-10%	0.322581
VAST-TOOLS	Alt3	complexASEs	covall	dPSI	10-25%	0.193548
VAST-TOOLS	Alt3	complexASEs	covall	dPSI	>25%	0.0645161
MAJIQ	Alt3	complexASEs	covall	dPSI	<1%	0.16129
MAJIQ	Alt3	complexASEs	covall	dPSI	1-5%	0.290323
MAJIQ	Alt3	complexASEs	covall	dPSI	5-10%	0.354839
MAJIQ	Alt3	complexASEs	covall	dPSI	10-25%	0.16129
MAJIQ	Alt3	complexASEs	covall	dPSI	>25%	0.0322581
MISO	Alt3	complexASEs	covall	dPSI	<1%	0.0645161
MISO	Alt3	complexASEs	covall	dPSI	1-5%	0.0645161
MISO	Alt3	complexASEs	covall	dPSI	5-10%	0.290323
MISO	Alt3	complexASEs	covall	dPSI	10-25%	0.322581
MISO	Alt3	complexASEs	covall	dPSI	>25%	0.258065
rMATS	Alt3	complexASEs	covall	dPSI	<1%	0.16129
rMATS	Alt3	complexASEs	covall	dPSI	1-5%	0.258065
rMATS	Alt3	complexASEs	covall	dPSI	5-10%	0.0967742
rMATS	Alt3	complexASEs	covall	dPSI	10-25%	0.290323
rMATS	Alt3	complexASEs	covall	dPSI	>25%	0.193548
VAST-TOOLS	Alt3	simpleAndcomplexASEs	covlow	dPSI	<1%	0.159091
VAST-TOOLS	Alt3	simpleAndcomplexASEs	covlow	dPSI	1-5%	0.340909
VAST-TOOLS	Alt3	simpleAndcomplexASEs	covlow	dPSI	5-10%	0.386364
VAST-TOOLS	Alt3	simpleAndcomplexASEs	covlow	dPSI	10-25%	0.0681818
VAST-TOOLS	Alt3	simpleAndcomplexASEs	covlow	dPSI	>25%	0.0454545
MAJIQ	Alt3	simpleAndcomplexASEs	covlow	dPSI	<1%	0.0681818
MAJIQ	Alt3	simpleAndcomplexASEs	covlow	dPSI	1-5%	0.25
MAJIQ	Alt3	simpleAndcomplexASEs	covlow	dPSI	5-10%	0.431818
MAJIQ	Alt3	simpleAndcomplexASEs	covlow	dPSI	10-25%	0.204545
MAJIQ	Alt3	simpleAndcomplexASEs	covlow	dPSI	>25%	0.0454545
MISO	Alt3	simpleAndcomplexASEs	covlow	dPSI	<1%	0.0227273
MISO	Alt3	simpleAndcomplexASEs	covlow	dPSI	1-5%	0.0909091
MISO	Alt3	simpleAndcomplexASEs	covlow	dPSI	5-10%	0.272727
MISO	Alt3	simpleAndcomplexASEs	covlow	dPSI	10-25%	0.25
MISO	Alt3	simpleAndcomplexASEs	covlow	dPSI	>25%	0.363636
rMATS	Alt3	simpleAndcomplexASEs	covlow	dPSI	<1%	0.25
rMATS	Alt3	simpleAndcomplexASEs	covlow	dPSI	1-5%	0.386364
rMATS	Alt3	simpleAndcomplexASEs	covlow	dPSI	5-10%	0.181818
rMATS	Alt3	simpleAndcomplexASEs	covlow	dPSI	10-25%	0.136364
rMATS	Alt3	simpleAndcomplexASEs	covlow	dPSI	>25%	0.0454545
VAST-TOOLS	Alt3	simpleAndcomplexASEs	covhigh	dPSI	<1%	0.304786
VAST-TOOLS	Alt3	simpleAndcomplexASEs	covhigh	dPSI	1-5%	0.501259
VAST-TOOLS	Alt3	simpleAndcomplexASEs	covhigh	dPSI	5-10%	0.103275
VAST-TOOLS	Alt3	simpleAndcomplexASEs	covhigh	dPSI	10-25%	0.0579345
VAST-TOOLS	Alt3	simpleAndcomplexASEs	covhigh	dPSI	>25%	0.0327456
MAJIQ	Alt3	simpleAndcomplexASEs	covhigh	dPSI	<1%	0.178841
MAJIQ	Alt3	simpleAndcomplexASEs	covhigh	dPSI	1-5%	0.488665
MAJIQ	Alt3	simpleAndcomplexASEs	covhigh	dPSI	5-10%	0.2267
MAJIQ	Alt3	simpleAndcomplexASEs	covhigh	dPSI	10-25%	0.0780856
MAJIQ	Alt3	simpleAndcomplexASEs	covhigh	dPSI	>25%	0.0277078
MISO	Alt3	simpleAndcomplexASEs	covhigh	dPSI	<1%	0.093199
MISO	Alt3	simpleAndcomplexASEs	covhigh	dPSI	1-5%	0.196474
MISO	Alt3	simpleAndcomplexASEs	covhigh	dPSI	5-10%	0.153652
MISO	Alt3	simpleAndcomplexASEs	covhigh	dPSI	10-25%	0.2267
MISO	Alt3	simpleAndcomplexASEs	covhigh	dPSI	>25%	0.329975
rMATS	Alt3	simpleAndcomplexASEs	covhigh	dPSI	<1%	0.191436
rMATS	Alt3	simpleAndcomplexASEs	covhigh	dPSI	1-5%	0.418136
rMATS	Alt3	simpleAndcomplexASEs	covhigh	dPSI	5-10%	0.211587
rMATS	Alt3	simpleAndcomplexASEs	covhigh	dPSI	10-25%	0.133501
rMATS	Alt3	simpleAndcomplexASEs	covhigh	dPSI	>25%	0.0453401
VAST-TOOLS	Alt3	simpleAndcomplexASEs	covall	dPSI	<1%	0.290249
VAST-TOOLS	Alt3	simpleAndcomplexASEs	covall	dPSI	1-5%	0.485261
VAST-TOOLS	Alt3	simpleAndcomplexASEs	covall	dPSI	5-10%	0.131519
VAST-TOOLS	Alt3	simpleAndcomplexASEs	covall	dPSI	10-25%	0.0589569
VAST-TOOLS	Alt3	simpleAndcomplexASEs	covall	dPSI	>25%	0.0340136
MAJIQ	Alt3	simpleAndcomplexASEs	covall	dPSI	<1%	0.1678
MAJIQ	Alt3	simpleAndcomplexASEs	covall	dPSI	1-5%	0.464853
MAJIQ	Alt3	simpleAndcomplexASEs	covall	dPSI	5-10%	0.247166
MAJIQ	Alt3	simpleAndcomplexASEs	covall	dPSI	10-25%	0.0907029
MAJIQ	Alt3	simpleAndcomplexASEs	covall	dPSI	>25%	0.0294785
MISO	Alt3	simpleAndcomplexASEs	covall	dPSI	<1%	0.0861678
MISO	Alt3	simpleAndcomplexASEs	covall	dPSI	1-5%	0.185941
MISO	Alt3	simpleAndcomplexASEs	covall	dPSI	5-10%	0.165533
MISO	Alt3	simpleAndcomplexASEs	covall	dPSI	10-25%	0.229025
MISO	Alt3	simpleAndcomplexASEs	covall	dPSI	>25%	0.333333
rMATS	Alt3	simpleAndcomplexASEs	covall	dPSI	<1%	0.197279
rMATS	Alt3	simpleAndcomplexASEs	covall	dPSI	1-5%	0.414966
rMATS	Alt3	simpleAndcomplexASEs	covall	dPSI	5-10%	0.208617
rMATS	Alt3	simpleAndcomplexASEs	covall	dPSI	10-25%	0.133787
rMATS	Alt3	simpleAndcomplexASEs	covall	dPSI	>25%	0.0453515
VAST-TOOLS	Alt3	simpleASEs	covlow	PSI	<1%	0.103448
VAST-TOOLS	Alt3	simpleASEs	covlow	PSI	1-5%	0.724138
VAST-TOOLS	Alt3	simpleASEs	covlow	PSI	5-10%	0.103448
VAST-TOOLS	Alt3	simpleASEs	covlow	PSI	10-25%	0.0344828
VAST-TOOLS	Alt3	simpleASEs	covlow	PSI	>25%	0.0344828
MAJIQ	Alt3	simpleASEs	covlow	PSI	<1%	0.137931
MAJIQ	Alt3	simpleASEs	covlow	PSI	1-5%	0.448276
MAJIQ	Alt3	simpleASEs	covlow	PSI	5-10%	0.241379
MAJIQ	Alt3	simpleASEs	covlow	PSI	10-25%	0.103448
MAJIQ	Alt3	simpleASEs	covlow	PSI	>25%	0.0689655
MISO	Alt3	simpleASEs	covlow	PSI	<1%	0.0689655
MISO	Alt3	simpleASEs	covlow	PSI	1-5%	0.103448
MISO	Alt3	simpleASEs	covlow	PSI	5-10%	0.241379
MISO	Alt3	simpleASEs	covlow	PSI	10-25%	0.137931
MISO	Alt3	simpleASEs	covlow	PSI	>25%	0.448276
rMATS	Alt3	simpleASEs	covlow	PSI	<1%	0.172414
rMATS	Alt3	simpleASEs	covlow	PSI	1-5%	0.344828
rMATS	Alt3	simpleASEs	covlow	PSI	5-10%	0.172414
rMATS	Alt3	simpleASEs	covlow	PSI	10-25%	0.137931
rMATS	Alt3	simpleASEs	covlow	PSI	>25%	0.172414
VAST-TOOLS	Alt3	simpleASEs	covhigh	PSI	<1%	0.364829
VAST-TOOLS	Alt3	simpleASEs	covhigh	PSI	1-5%	0.471129
VAST-TOOLS	Alt3	simpleASEs	covhigh	PSI	5-10%	0.0800525
VAST-TOOLS	Alt3	simpleASEs	covhigh	PSI	10-25%	0.0472441
VAST-TOOLS	Alt3	simpleASEs	covhigh	PSI	>25%	0.0367454
MAJIQ	Alt3	simpleASEs	covhigh	PSI	<1%	0.19685
MAJIQ	Alt3	simpleASEs	covhigh	PSI	1-5%	0.560367
MAJIQ	Alt3	simpleASEs	covhigh	PSI	5-10%	0.129921
MAJIQ	Alt3	simpleASEs	covhigh	PSI	10-25%	0.0643045
MAJIQ	Alt3	simpleASEs	covhigh	PSI	>25%	0.0485564
MISO	Alt3	simpleASEs	covhigh	PSI	<1%	0.0669291
MISO	Alt3	simpleASEs	covhigh	PSI	1-5%	0.160105
MISO	Alt3	simpleASEs	covhigh	PSI	5-10%	0.124672
MISO	Alt3	simpleASEs	covhigh	PSI	10-25%	0.190289
MISO	Alt3	simpleASEs	covhigh	PSI	>25%	0.458005
rMATS	Alt3	simpleASEs	covhigh	PSI	<1%	0.216535
rMATS	Alt3	simpleASEs	covhigh	PSI	1-5%	0.419948
rMATS	Alt3	simpleASEs	covhigh	PSI	5-10%	0.154856
rMATS	Alt3	simpleASEs	covhigh	PSI	10-25%	0.141732
rMATS	Alt3	simpleASEs	covhigh	PSI	>25%	0.0669291
VAST-TOOLS	Alt3	simpleASEs	covall	PSI	<1%	0.346341
VAST-TOOLS	Alt3	simpleASEs	covall	PSI	1-5%	0.489024
VAST-TOOLS	Alt3	simpleASEs	covall	PSI	5-10%	0.0817073
VAST-TOOLS	Alt3	simpleASEs	covall	PSI	10-25%	0.0463415
VAST-TOOLS	Alt3	simpleASEs	covall	PSI	>25%	0.0365854
MAJIQ	Alt3	simpleASEs	covall	PSI	<1%	0.192683
MAJIQ	Alt3	simpleASEs	covall	PSI	1-5%	0.552439
MAJIQ	Alt3	simpleASEs	covall	PSI	5-10%	0.137805
MAJIQ	Alt3	simpleASEs	covall	PSI	10-25%	0.0670732
MAJIQ	Alt3	simpleASEs	covall	PSI	>25%	0.05
MISO	Alt3	simpleASEs	covall	PSI	<1%	0.0670732
MISO	Alt3	simpleASEs	covall	PSI	1-5%	0.156098
MISO	Alt3	simpleASEs	covall	PSI	5-10%	0.132927
MISO	Alt3	simpleASEs	covall	PSI	10-25%	0.186585
MISO	Alt3	simpleASEs	covall	PSI	>25%	0.457317
rMATS	Alt3	simpleASEs	covall	PSI	<1%	0.213415
rMATS	Alt3	simpleASEs	covall	PSI	1-5%	0.414634
rMATS	Alt3	simpleASEs	covall	PSI	5-10%	0.156098
rMATS	Alt3	simpleASEs	covall	PSI	10-25%	0.141463
rMATS	Alt3	simpleASEs	covall	PSI	>25%	0.0743902
VAST-TOOLS	Alt3	complexASEs	covlow	PSI	<1%	0.153846
VAST-TOOLS	Alt3	complexASEs	covlow	PSI	1-5%	0.384615
VAST-TOOLS	Alt3	complexASEs	covlow	PSI	5-10%	0.461538
VAST-TOOLS	Alt3	complexASEs	covlow	PSI	10-25%	0
VAST-TOOLS	Alt3	complexASEs	covlow	PSI	>25%	0
MAJIQ	Alt3	complexASEs	covlow	PSI	<1%	0.307692
MAJIQ	Alt3	complexASEs	covlow	PSI	1-5%	0.461538
MAJIQ	Alt3	complexASEs	covlow	PSI	5-10%	0.230769
MAJIQ	Alt3	complexASEs	covlow	PSI	10-25%	0
MAJIQ	Alt3	complexASEs	covlow	PSI	>25%	0
MISO	Alt3	complexASEs	covlow	PSI	<1%	0
MISO	Alt3	complexASEs	covlow	PSI	1-5%	0.230769
MISO	Alt3	complexASEs	covlow	PSI	5-10%	0.153846
MISO	Alt3	complexASEs	covlow	PSI	10-25%	0.307692
MISO	Alt3	complexASEs	covlow	PSI	>25%	0.307692
rMATS	Alt3	complexASEs	covlow	PSI	<1%	0.0769231
rMATS	Alt3	complexASEs	covlow	PSI	1-5%	0.307692
rMATS	Alt3	complexASEs	covlow	PSI	5-10%	0.0769231
rMATS	Alt3	complexASEs	covlow	PSI	10-25%	0.461538
rMATS	Alt3	complexASEs	covlow	PSI	>25%	0.0769231
VAST-TOOLS	Alt3	complexASEs	covhigh	PSI	<1%	0.0612245
VAST-TOOLS	Alt3	complexASEs	covhigh	PSI	1-5%	0.387755
VAST-TOOLS	Alt3	complexASEs	covhigh	PSI	5-10%	0.163265
VAST-TOOLS	Alt3	complexASEs	covhigh	PSI	10-25%	0.142857
VAST-TOOLS	Alt3	complexASEs	covhigh	PSI	>25%	0.244898
MAJIQ	Alt3	complexASEs	covhigh	PSI	<1%	0.122449
MAJIQ	Alt3	complexASEs	covhigh	PSI	1-5%	0.530612
MAJIQ	Alt3	complexASEs	covhigh	PSI	5-10%	0.244898
MAJIQ	Alt3	complexASEs	covhigh	PSI	10-25%	0.0816327
MAJIQ	Alt3	complexASEs	covhigh	PSI	>25%	0.0204082
MISO	Alt3	complexASEs	covhigh	PSI	<1%	0.0612245
MISO	Alt3	complexASEs	covhigh	PSI	1-5%	0.163265
MISO	Alt3	complexASEs	covhigh	PSI	5-10%	0.183673
MISO	Alt3	complexASEs	covhigh	PSI	10-25%	0.244898
MISO	Alt3	complexASEs	covhigh	PSI	>25%	0.346939
rMATS	Alt3	complexASEs	covhigh	PSI	<1%	0.102041
rMATS	Alt3	complexASEs	covhigh	PSI	1-5%	0.204082
rMATS	Alt3	complexASEs	covhigh	PSI	5-10%	0.142857
rMATS	Alt3	complexASEs	covhigh	PSI	10-25%	0.183673
rMATS	Alt3	complexASEs	covhigh	PSI	>25%	0.367347
VAST-TOOLS	Alt3	complexASEs	covall	PSI	<1%	0.0806452
VAST-TOOLS	Alt3	complexASEs	covall	PSI	1-5%	0.387097
VAST-TOOLS	Alt3	complexASEs	covall	PSI	5-10%	0.225806
VAST-TOOLS	Alt3	complexASEs	covall	PSI	10-25%	0.112903
VAST-TOOLS	Alt3	complexASEs	covall	PSI	>25%	0.193548
MAJIQ	Alt3	complexASEs	covall	PSI	<1%	0.16129
MAJIQ	Alt3	complexASEs	covall	PSI	1-5%	0.516129
MAJIQ	Alt3	complexASEs	covall	PSI	5-10%	0.241935
MAJIQ	Alt3	complexASEs	covall	PSI	10-25%	0.0645161
MAJIQ	Alt3	complexASEs	covall	PSI	>25%	0.016129
MISO	Alt3	complexASEs	covall	PSI	<1%	0.0483871
MISO	Alt3	complexASEs	covall	PSI	1-5%	0.177419
MISO	Alt3	complexASEs	covall	PSI	5-10%	0.177419
MISO	Alt3	complexASEs	covall	PSI	10-25%	0.258065
MISO	Alt3	complexASEs	covall	PSI	>25%	0.33871
rMATS	Alt3	complexASEs	covall	PSI	<1%	0.0967742
rMATS	Alt3	complexASEs	covall	PSI	1-5%	0.225806
rMATS	Alt3	complexASEs	covall	PSI	5-10%	0.129032
rMATS	Alt3	complexASEs	covall	PSI	10-25%	0.241935
rMATS	Alt3	complexASEs	covall	PSI	>25%	0.306452
VAST-TOOLS	Alt3	simpleAndcomplexASEs	covlow	PSI	<1%	0.112676
VAST-TOOLS	Alt3	simpleAndcomplexASEs	covlow	PSI	1-5%	0.661972
VAST-TOOLS	Alt3	simpleAndcomplexASEs	covlow	PSI	5-10%	0.169014
VAST-TOOLS	Alt3	simpleAndcomplexASEs	covlow	PSI	10-25%	0.028169
VAST-TOOLS	Alt3	simpleAndcomplexASEs	covlow	PSI	>25%	0.028169
MAJIQ	Alt3	simpleAndcomplexASEs	covlow	PSI	<1%	0.169014
MAJIQ	Alt3	simpleAndcomplexASEs	covlow	PSI	1-5%	0.450704
MAJIQ	Alt3	simpleAndcomplexASEs	covlow	PSI	5-10%	0.239437
MAJIQ	Alt3	simpleAndcomplexASEs	covlow	PSI	10-25%	0.084507
MAJIQ	Alt3	simpleAndcomplexASEs	covlow	PSI	>25%	0.056338
MISO	Alt3	simpleAndcomplexASEs	covlow	PSI	<1%	0.056338
MISO	Alt3	simpleAndcomplexASEs	covlow	PSI	1-5%	0.126761
MISO	Alt3	simpleAndcomplexASEs	covlow	PSI	5-10%	0.225352
MISO	Alt3	simpleAndcomplexASEs	covlow	PSI	10-25%	0.169014
MISO	Alt3	simpleAndcomplexASEs	covlow	PSI	>25%	0.422535
rMATS	Alt3	simpleAndcomplexASEs	covlow	PSI	<1%	0.15493
rMATS	Alt3	simpleAndcomplexASEs	covlow	PSI	1-5%	0.338028
rMATS	Alt3	simpleAndcomplexASEs	covlow	PSI	5-10%	0.15493
rMATS	Alt3	simpleAndcomplexASEs	covlow	PSI	10-25%	0.197183
rMATS	Alt3	simpleAndcomplexASEs	covlow	PSI	>25%	0.15493
VAST-TOOLS	Alt3	simpleAndcomplexASEs	covhigh	PSI	<1%	0.346486
VAST-TOOLS	Alt3	simpleAndcomplexASEs	covhigh	PSI	1-5%	0.466091
VAST-TOOLS	Alt3	simpleAndcomplexASEs	covhigh	PSI	5-10%	0.0850801
VAST-TOOLS	Alt3	simpleAndcomplexASEs	covhigh	PSI	10-25%	0.053021
VAST-TOOLS	Alt3	simpleAndcomplexASEs	covhigh	PSI	>25%	0.0493218
MAJIQ	Alt3	simpleAndcomplexASEs	covhigh	PSI	<1%	0.192355
MAJIQ	Alt3	simpleAndcomplexASEs	covhigh	PSI	1-5%	0.55857
MAJIQ	Alt3	simpleAndcomplexASEs	covhigh	PSI	5-10%	0.136868
MAJIQ	Alt3	simpleAndcomplexASEs	covhigh	PSI	10-25%	0.0653514
MAJIQ	Alt3	simpleAndcomplexASEs	covhigh	PSI	>25%	0.0468557
MISO	Alt3	simpleAndcomplexASEs	covhigh	PSI	<1%	0.0665845
MISO	Alt3	simpleAndcomplexASEs	covhigh	PSI	1-5%	0.160296
MISO	Alt3	simpleAndcomplexASEs	covhigh	PSI	5-10%	0.128237
MISO	Alt3	simpleAndcomplexASEs	covhigh	PSI	10-25%	0.193588
MISO	Alt3	simpleAndcomplexASEs	covhigh	PSI	>25%	0.451295
rMATS	Alt3	simpleAndcomplexASEs	covhigh	PSI	<1%	0.209618
rMATS	Alt3	simpleAndcomplexASEs	covhigh	PSI	1-5%	0.406905
rMATS	Alt3	simpleAndcomplexASEs	covhigh	PSI	5-10%	0.154131
rMATS	Alt3	simpleAndcomplexASEs	covhigh	PSI	10-25%	0.144266
rMATS	Alt3	simpleAndcomplexASEs	covhigh	PSI	>25%	0.0850801
VAST-TOOLS	Alt3	simpleAndcomplexASEs	covall	PSI	<1%	0.327664
VAST-TOOLS	Alt3	simpleAndcomplexASEs	covall	PSI	1-5%	0.481859
VAST-TOOLS	Alt3	simpleAndcomplexASEs	covall	PSI	5-10%	0.0918367
VAST-TOOLS	Alt3	simpleAndcomplexASEs	covall	PSI	10-25%	0.0510204
VAST-TOOLS	Alt3	simpleAndcomplexASEs	covall	PSI	>25%	0.047619
MAJIQ	Alt3	simpleAndcomplexASEs	covall	PSI	<1%	0.190476
MAJIQ	Alt3	simpleAndcomplexASEs	covall	PSI	1-5%	0.549887
MAJIQ	Alt3	simpleAndcomplexASEs	covall	PSI	5-10%	0.145125
MAJIQ	Alt3	simpleAndcomplexASEs	covall	PSI	10-25%	0.0668934
MAJIQ	Alt3	simpleAndcomplexASEs	covall	PSI	>25%	0.047619
MISO	Alt3	simpleAndcomplexASEs	covall	PSI	<1%	0.0657596
MISO	Alt3	simpleAndcomplexASEs	covall	PSI	1-5%	0.157596
MISO	Alt3	simpleAndcomplexASEs	covall	PSI	5-10%	0.136054
MISO	Alt3	simpleAndcomplexASEs	covall	PSI	10-25%	0.19161
MISO	Alt3	simpleAndcomplexASEs	covall	PSI	>25%	0.44898
rMATS	Alt3	simpleAndcomplexASEs	covall	PSI	<1%	0.205215
rMATS	Alt3	simpleAndcomplexASEs	covall	PSI	1-5%	0.401361
rMATS	Alt3	simpleAndcomplexASEs	covall	PSI	5-10%	0.154195
rMATS	Alt3	simpleAndcomplexASEs	covall	PSI	10-25%	0.148526
rMATS	Alt3	simpleAndcomplexASEs	covall	PSI	>25%	0.0907029
VAST-TOOLS	Alt3	simpleASEs	covlow	dPSI	<1%	0.111111
VAST-TOOLS	Alt3	simpleASEs	covlow	dPSI	1-5%	0.388889
VAST-TOOLS	Alt3	simpleASEs	covlow	dPSI	5-10%	0.388889
VAST-TOOLS	Alt3	simpleASEs	covlow	dPSI	10-25%	0.0555556
VAST-TOOLS	Alt3	simpleASEs	covlow	dPSI	>25%	0.0555556
MAJIQ	Alt3	simpleASEs	covlow	dPSI	<1%	0.0555556
MAJIQ	Alt3	simpleASEs	covlow	dPSI	1-5%	0.277778
MAJIQ	Alt3	simpleASEs	covlow	dPSI	5-10%	0.444444
MAJIQ	Alt3	simpleASEs	covlow	dPSI	10-25%	0.166667
MAJIQ	Alt3	simpleASEs	covlow	dPSI	>25%	0.0555556
MISO	Alt3	simpleASEs	covlow	dPSI	<1%	0
MISO	Alt3	simpleASEs	covlow	dPSI	1-5%	0.111111
MISO	Alt3	simpleASEs	covlow	dPSI	5-10%	0.277778
MISO	Alt3	simpleASEs	covlow	dPSI	10-25%	0.222222
MISO	Alt3	simpleASEs	covlow	dPSI	>25%	0.388889
rMATS	Alt3	simpleASEs	covlow	dPSI	<1%	0.222222
rMATS	Alt3	simpleASEs	covlow	dPSI	1-5%	0.388889
rMATS	Alt3	simpleASEs	covlow	dPSI	5-10%	0.222222
rMATS	Alt3	simpleASEs	covlow	dPSI	10-25%	0.111111
rMATS	Alt3	simpleASEs	covlow	dPSI	>25%	0.0555556
VAST-TOOLS	Alt3	simpleASEs	covhigh	dPSI	<1%	0.315508
VAST-TOOLS	Alt3	simpleASEs	covhigh	dPSI	1-5%	0.516043
VAST-TOOLS	Alt3	simpleASEs	covhigh	dPSI	5-10%	0.0909091
VAST-TOOLS	Alt3	simpleASEs	covhigh	dPSI	10-25%	0.0481283
VAST-TOOLS	Alt3	simpleASEs	covhigh	dPSI	>25%	0.0294118
MAJIQ	Alt3	simpleASEs	covhigh	dPSI	<1%	0.179144
MAJIQ	Alt3	simpleASEs	covhigh	dPSI	1-5%	0.497326
MAJIQ	Alt3	simpleASEs	covhigh	dPSI	5-10%	0.219251
MAJIQ	Alt3	simpleASEs	covhigh	dPSI	10-25%	0.0775401
MAJIQ	Alt3	simpleASEs	covhigh	dPSI	>25%	0.026738
MISO	Alt3	simpleASEs	covhigh	dPSI	<1%	0.0962567
MISO	Alt3	simpleASEs	covhigh	dPSI	1-5%	0.203209
MISO	Alt3	simpleASEs	covhigh	dPSI	5-10%	0.144385
MISO	Alt3	simpleASEs	covhigh	dPSI	10-25%	0.221925
MISO	Alt3	simpleASEs	covhigh	dPSI	>25%	0.334225
rMATS	Alt3	simpleASEs	covhigh	dPSI	<1%	0.197861
rMATS	Alt3	simpleASEs	covhigh	dPSI	1-5%	0.430481
rMATS	Alt3	simpleASEs	covhigh	dPSI	5-10%	0.216578
rMATS	Alt3	simpleASEs	covhigh	dPSI	10-25%	0.122995
rMATS	Alt3	simpleASEs	covhigh	dPSI	>25%	0.0320856
VAST-TOOLS	Alt3	simpleASEs	covall	dPSI	<1%	0.297561
VAST-TOOLS	Alt3	simpleASEs	covall	dPSI	1-5%	0.504878
VAST-TOOLS	Alt3	simpleASEs	covall	dPSI	5-10%	0.117073
VAST-TOOLS	Alt3	simpleASEs	covall	dPSI	10-25%	0.0487805
VAST-TOOLS	Alt3	simpleASEs	covall	dPSI	>25%	0.0317073
MAJIQ	Alt3	simpleASEs	covall	dPSI	<1%	0.168293
MAJIQ	Alt3	simpleASEs	covall	dPSI	1-5%	0.478049
MAJIQ	Alt3	simpleASEs	covall	dPSI	5-10%	0.239024
MAJIQ	Alt3	simpleASEs	covall	dPSI	10-25%	0.0853659
MAJIQ	Alt3	simpleASEs	covall	dPSI	>25%	0.0292683
MISO	Alt3	simpleASEs	covall	dPSI	<1%	0.0878049
MISO	Alt3	simpleASEs	covall	dPSI	1-5%	0.195122
MISO	Alt3	simpleASEs	covall	dPSI	5-10%	0.156098
MISO	Alt3	simpleASEs	covall	dPSI	10-25%	0.221951
MISO	Alt3	simpleASEs	covall	dPSI	>25%	0.339024
rMATS	Alt3	simpleASEs	covall	dPSI	<1%	0.2
rMATS	Alt3	simpleASEs	covall	dPSI	1-5%	0.426829
rMATS	Alt3	simpleASEs	covall	dPSI	5-10%	0.217073
rMATS	Alt3	simpleASEs	covall	dPSI	10-25%	0.121951
rMATS	Alt3	simpleASEs	covall	dPSI	>25%	0.0341463
VAST-TOOLS	Alt3	complexASEs	covlow	dPSI	<1%	0.375
VAST-TOOLS	Alt3	complexASEs	covlow	dPSI	1-5%	0.125
VAST-TOOLS	Alt3	complexASEs	covlow	dPSI	5-10%	0.375
VAST-TOOLS	Alt3	complexASEs	covlow	dPSI	10-25%	0.125
VAST-TOOLS	Alt3	complexASEs	covlow	dPSI	>25%	0
MAJIQ	Alt3	complexASEs	covlow	dPSI	<1%	0.125
MAJIQ	Alt3	complexASEs	covlow	dPSI	1-5%	0.125
MAJIQ	Alt3	complexASEs	covlow	dPSI	5-10%	0.375
MAJIQ	Alt3	complexASEs	covlow	dPSI	10-25%	0.375
MAJIQ	Alt3	complexASEs	covlow	dPSI	>25%	0
MISO	Alt3	complexASEs	covlow	dPSI	<1%	0.125
MISO	Alt3	complexASEs	covlow	dPSI	1-5%	0
MISO	Alt3	complexASEs	covlow	dPSI	5-10%	0.25
MISO	Alt3	complexASEs	covlow	dPSI	10-25%	0.375
MISO	Alt3	complexASEs	covlow	dPSI	>25%	0.25
rMATS	Alt3	complexASEs	covlow	dPSI	<1%	0.375
rMATS	Alt3	complexASEs	covlow	dPSI	1-5%	0.375
rMATS	Alt3	complexASEs	covlow	dPSI	5-10%	0
rMATS	Alt3	complexASEs	covlow	dPSI	10-25%	0.25
rMATS	Alt3	complexASEs	covlow	dPSI	>25%	0
VAST-TOOLS	Alt3	complexASEs	covhigh	dPSI	<1%	0.130435
VAST-TOOLS	Alt3	complexASEs	covhigh	dPSI	1-5%	0.26087
VAST-TOOLS	Alt3	complexASEs	covhigh	dPSI	5-10%	0.304348
VAST-TOOLS	Alt3	complexASEs	covhigh	dPSI	10-25%	0.217391
VAST-TOOLS	Alt3	complexASEs	covhigh	dPSI	>25%	0.0869565
MAJIQ	Alt3	complexASEs	covhigh	dPSI	<1%	0.173913
MAJIQ	Alt3	complexASEs	covhigh	dPSI	1-5%	0.347826
MAJIQ	Alt3	complexASEs	covhigh	dPSI	5-10%	0.347826
MAJIQ	Alt3	complexASEs	covhigh	dPSI	10-25%	0.0869565
MAJIQ	Alt3	complexASEs	covhigh	dPSI	>25%	0.0434783
MISO	Alt3	complexASEs	covhigh	dPSI	<1%	0.0434783
MISO	Alt3	complexASEs	covhigh	dPSI	1-5%	0.0869565
MISO	Alt3	complexASEs	covhigh	dPSI	5-10%	0.304348
MISO	Alt3	complexASEs	covhigh	dPSI	10-25%	0.304348
MISO	Alt3	complexASEs	covhigh	dPSI	>25%	0.26087
rMATS	Alt3	complexASEs	covhigh	dPSI	<1%	0.0869565
rMATS	Alt3	complexASEs	covhigh	dPSI	1-5%	0.217391
rMATS	Alt3	complexASEs	covhigh	dPSI	5-10%	0.130435
rMATS	Alt3	complexASEs	covhigh	dPSI	10-25%	0.304348
rMATS	Alt3	complexASEs	covhigh	dPSI	>25%	0.26087
VAST-TOOLS	Alt3	complexASEs	covall	dPSI	<1%	0.193548
VAST-TOOLS	Alt3	complexASEs	covall	dPSI	1-5%	0.225806
VAST-TOOLS	Alt3	complexASEs	covall	dPSI	5-10%	0.322581
VAST-TOOLS	Alt3	complexASEs	covall	dPSI	10-25%	0.193548
VAST-TOOLS	Alt3	complexASEs	covall	dPSI	>25%	0.0645161
MAJIQ	Alt3	complexASEs	covall	dPSI	<1%	0.16129
MAJIQ	Alt3	complexASEs	covall	dPSI	1-5%	0.290323
MAJIQ	Alt3	complexASEs	covall	dPSI	5-10%	0.354839
MAJIQ	Alt3	complexASEs	covall	dPSI	10-25%	0.16129
MAJIQ	Alt3	complexASEs	covall	dPSI	>25%	0.0322581
MISO	Alt3	complexASEs	covall	dPSI	<1%	0.0645161
MISO	Alt3	complexASEs	covall	dPSI	1-5%	0.0645161
MISO	Alt3	complexASEs	covall	dPSI	5-10%	0.290323
MISO	Alt3	complexASEs	covall	dPSI	10-25%	0.322581
MISO	Alt3	complexASEs	covall	dPSI	>25%	0.258065
rMATS	Alt3	complexASEs	covall	dPSI	<1%	0.16129
rMATS	Alt3	complexASEs	covall	dPSI	1-5%	0.258065
rMATS	Alt3	complexASEs	covall	dPSI	5-10%	0.0967742
rMATS	Alt3	complexASEs	covall	dPSI	10-25%	0.290323
rMATS	Alt3	complexASEs	covall	dPSI	>25%	0.193548
VAST-TOOLS	Alt3	simpleAndcomplexASEs	covlow	dPSI	<1%	0.159091
VAST-TOOLS	Alt3	simpleAndcomplexASEs	covlow	dPSI	1-5%	0.340909
VAST-TOOLS	Alt3	simpleAndcomplexASEs	covlow	dPSI	5-10%	0.386364
VAST-TOOLS	Alt3	simpleAndcomplexASEs	covlow	dPSI	10-25%	0.0681818
VAST-TOOLS	Alt3	simpleAndcomplexASEs	covlow	dPSI	>25%	0.0454545
MAJIQ	Alt3	simpleAndcomplexASEs	covlow	dPSI	<1%	0.0681818
MAJIQ	Alt3	simpleAndcomplexASEs	covlow	dPSI	1-5%	0.25
MAJIQ	Alt3	simpleAndcomplexASEs	covlow	dPSI	5-10%	0.431818
MAJIQ	Alt3	simpleAndcomplexASEs	covlow	dPSI	10-25%	0.204545
MAJIQ	Alt3	simpleAndcomplexASEs	covlow	dPSI	>25%	0.0454545
MISO	Alt3	simpleAndcomplexASEs	covlow	dPSI	<1%	0.0227273
MISO	Alt3	simpleAndcomplexASEs	covlow	dPSI	1-5%	0.0909091
MISO	Alt3	simpleAndcomplexASEs	covlow	dPSI	5-10%	0.272727
MISO	Alt3	simpleAndcomplexASEs	covlow	dPSI	10-25%	0.25
MISO	Alt3	simpleAndcomplexASEs	covlow	dPSI	>25%	0.363636
rMATS	Alt3	simpleAndcomplexASEs	covlow	dPSI	<1%	0.25
rMATS	Alt3	simpleAndcomplexASEs	covlow	dPSI	1-5%	0.386364
rMATS	Alt3	simpleAndcomplexASEs	covlow	dPSI	5-10%	0.181818
rMATS	Alt3	simpleAndcomplexASEs	covlow	dPSI	10-25%	0.136364
rMATS	Alt3	simpleAndcomplexASEs	covlow	dPSI	>25%	0.0454545
VAST-TOOLS	Alt3	simpleAndcomplexASEs	covhigh	dPSI	<1%	0.304786
VAST-TOOLS	Alt3	simpleAndcomplexASEs	covhigh	dPSI	1-5%	0.501259
VAST-TOOLS	Alt3	simpleAndcomplexASEs	covhigh	dPSI	5-10%	0.103275
VAST-TOOLS	Alt3	simpleAndcomplexASEs	covhigh	dPSI	10-25%	0.0579345
VAST-TOOLS	Alt3	simpleAndcomplexASEs	covhigh	dPSI	>25%	0.0327456
MAJIQ	Alt3	simpleAndcomplexASEs	covhigh	dPSI	<1%	0.178841
MAJIQ	Alt3	simpleAndcomplexASEs	covhigh	dPSI	1-5%	0.488665
MAJIQ	Alt3	simpleAndcomplexASEs	covhigh	dPSI	5-10%	0.2267
MAJIQ	Alt3	simpleAndcomplexASEs	covhigh	dPSI	10-25%	0.0780856
MAJIQ	Alt3	simpleAndcomplexASEs	covhigh	dPSI	>25%	0.0277078
MISO	Alt3	simpleAndcomplexASEs	covhigh	dPSI	<1%	0.093199
MISO	Alt3	simpleAndcomplexASEs	covhigh	dPSI	1-5%	0.196474
MISO	Alt3	simpleAndcomplexASEs	covhigh	dPSI	5-10%	0.153652
MISO	Alt3	simpleAndcomplexASEs	covhigh	dPSI	10-25%	0.2267
MISO	Alt3	simpleAndcomplexASEs	covhigh	dPSI	>25%	0.329975
rMATS	Alt3	simpleAndcomplexASEs	covhigh	dPSI	<1%	0.191436
rMATS	Alt3	simpleAndcomplexASEs	covhigh	dPSI	1-5%	0.418136
rMATS	Alt3	simpleAndcomplexASEs	covhigh	dPSI	5-10%	0.211587
rMATS	Alt3	simpleAndcomplexASEs	covhigh	dPSI	10-25%	0.133501
rMATS	Alt3	simpleAndcomplexASEs	covhigh	dPSI	>25%	0.0453401
VAST-TOOLS	Alt3	simpleAndcomplexASEs	covall	dPSI	<1%	0.290249
VAST-TOOLS	Alt3	simpleAndcomplexASEs	covall	dPSI	1-5%	0.485261
VAST-TOOLS	Alt3	simpleAndcomplexASEs	covall	dPSI	5-10%	0.131519
VAST-TOOLS	Alt3	simpleAndcomplexASEs	covall	dPSI	10-25%	0.0589569
VAST-TOOLS	Alt3	simpleAndcomplexASEs	covall	dPSI	>25%	0.0340136
MAJIQ	Alt3	simpleAndcomplexASEs	covall	dPSI	<1%	0.1678
MAJIQ	Alt3	simpleAndcomplexASEs	covall	dPSI	1-5%	0.464853
MAJIQ	Alt3	simpleAndcomplexASEs	covall	dPSI	5-10%	0.247166
MAJIQ	Alt3	simpleAndcomplexASEs	covall	dPSI	10-25%	0.0907029
MAJIQ	Alt3	simpleAndcomplexASEs	covall	dPSI	>25%	0.0294785
MISO	Alt3	simpleAndcomplexASEs	covall	dPSI	<1%	0.0861678
MISO	Alt3	simpleAndcomplexASEs	covall	dPSI	1-5%	0.185941
MISO	Alt3	simpleAndcomplexASEs	covall	dPSI	5-10%	0.165533
MISO	Alt3	simpleAndcomplexASEs	covall	dPSI	10-25%	0.229025
MISO	Alt3	simpleAndcomplexASEs	covall	dPSI	>25%	0.333333
rMATS	Alt3	simpleAndcomplexASEs	covall	dPSI	<1%	0.197279
rMATS	Alt3	simpleAndcomplexASEs	covall	dPSI	1-5%	0.414966
rMATS	Alt3	simpleAndcomplexASEs	covall	dPSI	5-10%	0.208617
rMATS	Alt3	simpleAndcomplexASEs	covall	dPSI	10-25%	0.133787
rMATS	Alt3	simpleAndcomplexASEs	covall	dPSI	>25%	0.0453515
VAST-TOOLS	Alt5	simpleASEs	covlow	PSI	<1%	0
VAST-TOOLS	Alt5	simpleASEs	covlow	PSI	1-5%	0.5
VAST-TOOLS	Alt5	simpleASEs	covlow	PSI	5-10%	0.5
VAST-TOOLS	Alt5	simpleASEs	covlow	PSI	10-25%	0
VAST-TOOLS	Alt5	simpleASEs	covlow	PSI	>25%	0
MAJIQ	Alt5	simpleASEs	covlow	PSI	<1%	0
MAJIQ	Alt5	simpleASEs	covlow	PSI	1-5%	0.125
MAJIQ	Alt5	simpleASEs	covlow	PSI	5-10%	0.3125
MAJIQ	Alt5	simpleASEs	covlow	PSI	10-25%	0.125
MAJIQ	Alt5	simpleASEs	covlow	PSI	>25%	0.4375
MISO	Alt5	simpleASEs	covlow	PSI	<1%	0
MISO	Alt5	simpleASEs	covlow	PSI	1-5%	0.25
MISO	Alt5	simpleASEs	covlow	PSI	5-10%	0.125
MISO	Alt5	simpleASEs	covlow	PSI	10-25%	0.25
MISO	Alt5	simpleASEs	covlow	PSI	>25%	0.375
rMATS	Alt5	simpleASEs	covlow	PSI	<1%	0.25
rMATS	Alt5	simpleASEs	covlow	PSI	1-5%	0.25
rMATS	Alt5	simpleASEs	covlow	PSI	5-10%	0.125
rMATS	Alt5	simpleASEs	covlow	PSI	10-25%	0.25
rMATS	Alt5	simpleASEs	covlow	PSI	>25%	0.125
VAST-TOOLS	Alt5	simpleASEs	covhigh	PSI	<1%	0.308219
VAST-TOOLS	Alt5	simpleASEs	covhigh	PSI	1-5%	0.431507
VAST-TOOLS	Alt5	simpleASEs	covhigh	PSI	5-10%	0.123288
VAST-TOOLS	Alt5	simpleASEs	covhigh	PSI	10-25%	0.0890411
VAST-TOOLS	Alt5	simpleASEs	covhigh	PSI	>25%	0.0479452
MAJIQ	Alt5	simpleASEs	covhigh	PSI	<1%	0.0924658
MAJIQ	Alt5	simpleASEs	covhigh	PSI	1-5%	0.369863
MAJIQ	Alt5	simpleASEs	covhigh	PSI	5-10%	0.208904
MAJIQ	Alt5	simpleASEs	covhigh	PSI	10-25%	0.143836
MAJIQ	Alt5	simpleASEs	covhigh	PSI	>25%	0.184932
MISO	Alt5	simpleASEs	covhigh	PSI	<1%	0.143836
MISO	Alt5	simpleASEs	covhigh	PSI	1-5%	0.226027
MISO	Alt5	simpleASEs	covhigh	PSI	5-10%	0.0958904
MISO	Alt5	simpleASEs	covhigh	PSI	10-25%	0.226027
MISO	Alt5	simpleASEs	covhigh	PSI	>25%	0.308219
rMATS	Alt5	simpleASEs	covhigh	PSI	<1%	0.109589
rMATS	Alt5	simpleASEs	covhigh	PSI	1-5%	0.376712
rMATS	Alt5	simpleASEs	covhigh	PSI	5-10%	0.191781
rMATS	Alt5	simpleASEs	covhigh	PSI	10-25%	0.215753
rMATS	Alt5	simpleASEs	covhigh	PSI	>25%	0.106164
VAST-TOOLS	Alt5	simpleASEs	covall	PSI	<1%	0.292208
VAST-TOOLS	Alt5	simpleASEs	covall	PSI	1-5%	0.435065
VAST-TOOLS	Alt5	simpleASEs	covall	PSI	5-10%	0.142857
VAST-TOOLS	Alt5	simpleASEs	covall	PSI	10-25%	0.0844156
VAST-TOOLS	Alt5	simpleASEs	covall	PSI	>25%	0.0454545
MAJIQ	Alt5	simpleASEs	covall	PSI	<1%	0.0876623
MAJIQ	Alt5	simpleASEs	covall	PSI	1-5%	0.357143
MAJIQ	Alt5	simpleASEs	covall	PSI	5-10%	0.214286
MAJIQ	Alt5	simpleASEs	covall	PSI	10-25%	0.142857
MAJIQ	Alt5	simpleASEs	covall	PSI	>25%	0.198052
MISO	Alt5	simpleASEs	covall	PSI	<1%	0.136364
MISO	Alt5	simpleASEs	covall	PSI	1-5%	0.227273
MISO	Alt5	simpleASEs	covall	PSI	5-10%	0.0974026
MISO	Alt5	simpleASEs	covall	PSI	10-25%	0.227273
MISO	Alt5	simpleASEs	covall	PSI	>25%	0.311688
rMATS	Alt5	simpleASEs	covall	PSI	<1%	0.116883
rMATS	Alt5	simpleASEs	covall	PSI	1-5%	0.37013
rMATS	Alt5	simpleASEs	covall	PSI	5-10%	0.188312
rMATS	Alt5	simpleASEs	covall	PSI	10-25%	0.217532
rMATS	Alt5	simpleASEs	covall	PSI	>25%	0.107143
VAST-TOOLS	Alt5	complexASEs	covlow	PSI	<1%	0
VAST-TOOLS	Alt5	complexASEs	covlow	PSI	1-5%	0.5
VAST-TOOLS	Alt5	complexASEs	covlow	PSI	5-10%	0.25
VAST-TOOLS	Alt5	complexASEs	covlow	PSI	10-25%	0
VAST-TOOLS	Alt5	complexASEs	covlow	PSI	>25%	0.25
MAJIQ	Alt5	complexASEs	covlow	PSI	<1%	0
MAJIQ	Alt5	complexASEs	covlow	PSI	1-5%	0
MAJIQ	Alt5	complexASEs	covlow	PSI	5-10%	0
MAJIQ	Alt5	complexASEs	covlow	PSI	10-25%	0.25
MAJIQ	Alt5	complexASEs	covlow	PSI	>25%	0.75
MISO	Alt5	complexASEs	covlow	PSI	<1%	0.25
MISO	Alt5	complexASEs	covlow	PSI	1-5%	0
MISO	Alt5	complexASEs	covlow	PSI	5-10%	0
MISO	Alt5	complexASEs	covlow	PSI	10-25%	0.5
MISO	Alt5	complexASEs	covlow	PSI	>25%	0.25
rMATS	Alt5	complexASEs	covlow	PSI	<1%	0
rMATS	Alt5	complexASEs	covlow	PSI	1-5%	0.25
rMATS	Alt5	complexASEs	covlow	PSI	5-10%	0.25
rMATS	Alt5	complexASEs	covlow	PSI	10-25%	0.25
rMATS	Alt5	complexASEs	covlow	PSI	>25%	0.25
VAST-TOOLS	Alt5	complexASEs	covhigh	PSI	<1%	0.119565
VAST-TOOLS	Alt5	complexASEs	covhigh	PSI	1-5%	0.195652
VAST-TOOLS	Alt5	complexASEs	covhigh	PSI	5-10%	0.152174
VAST-TOOLS	Alt5	complexASEs	covhigh	PSI	10-25%	0.326087
VAST-TOOLS	Alt5	complexASEs	covhigh	PSI	>25%	0.206522
MAJIQ	Alt5	complexASEs	covhigh	PSI	<1%	0.076087
MAJIQ	Alt5	complexASEs	covhigh	PSI	1-5%	0.173913
MAJIQ	Alt5	complexASEs	covhigh	PSI	5-10%	0.076087
MAJIQ	Alt5	complexASEs	covhigh	PSI	10-25%	0.347826
MAJIQ	Alt5	complexASEs	covhigh	PSI	>25%	0.326087
MISO	Alt5	complexASEs	covhigh	PSI	<1%	0.108696
MISO	Alt5	complexASEs	covhigh	PSI	1-5%	0.152174
MISO	Alt5	complexASEs	covhigh	PSI	5-10%	0.141304
MISO	Alt5	complexASEs	covhigh	PSI	10-25%	0.217391
MISO	Alt5	complexASEs	covhigh	PSI	>25%	0.380435
rMATS	Alt5	complexASEs	covhigh	PSI	<1%	0.0652174
rMATS	Alt5	complexASEs	covhigh	PSI	1-5%	0.206522
rMATS	Alt5	complexASEs	covhigh	PSI	5-10%	0.184783
rMATS	Alt5	complexASEs	covhigh	PSI	10-25%	0.217391
rMATS	Alt5	complexASEs	covhigh	PSI	>25%	0.326087
VAST-TOOLS	Alt5	complexASEs	covall	PSI	<1%	0.114583
VAST-TOOLS	Alt5	complexASEs	covall	PSI	1-5%	0.208333
VAST-TOOLS	Alt5	complexASEs	covall	PSI	5-10%	0.15625
VAST-TOOLS	Alt5	complexASEs	covall	PSI	10-25%	0.3125
VAST-TOOLS	Alt5	complexASEs	covall	PSI	>25%	0.208333
MAJIQ	Alt5	complexASEs	covall	PSI	<1%	0.0729167
MAJIQ	Alt5	complexASEs	covall	PSI	1-5%	0.166667
MAJIQ	Alt5	complexASEs	covall	PSI	5-10%	0.0729167
MAJIQ	Alt5	complexASEs	covall	PSI	10-25%	0.34375
MAJIQ	Alt5	complexASEs	covall	PSI	>25%	0.34375
MISO	Alt5	complexASEs	covall	PSI	<1%	0.114583
MISO	Alt5	complexASEs	covall	PSI	1-5%	0.145833
MISO	Alt5	complexASEs	covall	PSI	5-10%	0.135417
MISO	Alt5	complexASEs	covall	PSI	10-25%	0.229167
MISO	Alt5	complexASEs	covall	PSI	>25%	0.375
rMATS	Alt5	complexASEs	covall	PSI	<1%	0.0625
rMATS	Alt5	complexASEs	covall	PSI	1-5%	0.208333
rMATS	Alt5	complexASEs	covall	PSI	5-10%	0.1875
rMATS	Alt5	complexASEs	covall	PSI	10-25%	0.21875
rMATS	Alt5	complexASEs	covall	PSI	>25%	0.322917
VAST-TOOLS	Alt5	simpleAndcomplexASEs	covlow	PSI	<1%	0
VAST-TOOLS	Alt5	simpleAndcomplexASEs	covlow	PSI	1-5%	0.5
VAST-TOOLS	Alt5	simpleAndcomplexASEs	covlow	PSI	5-10%	0.45
VAST-TOOLS	Alt5	simpleAndcomplexASEs	covlow	PSI	10-25%	0
VAST-TOOLS	Alt5	simpleAndcomplexASEs	covlow	PSI	>25%	0.05
MAJIQ	Alt5	simpleAndcomplexASEs	covlow	PSI	<1%	0
MAJIQ	Alt5	simpleAndcomplexASEs	covlow	PSI	1-5%	0.1
MAJIQ	Alt5	simpleAndcomplexASEs	covlow	PSI	5-10%	0.25
MAJIQ	Alt5	simpleAndcomplexASEs	covlow	PSI	10-25%	0.15
MAJIQ	Alt5	simpleAndcomplexASEs	covlow	PSI	>25%	0.5
MISO	Alt5	simpleAndcomplexASEs	covlow	PSI	<1%	0.05
MISO	Alt5	simpleAndcomplexASEs	covlow	PSI	1-5%	0.2
MISO	Alt5	simpleAndcomplexASEs	covlow	PSI	5-10%	0.1
MISO	Alt5	simpleAndcomplexASEs	covlow	PSI	10-25%	0.3
MISO	Alt5	simpleAndcomplexASEs	covlow	PSI	>25%	0.35
rMATS	Alt5	simpleAndcomplexASEs	covlow	PSI	<1%	0.2
rMATS	Alt5	simpleAndcomplexASEs	covlow	PSI	1-5%	0.25
rMATS	Alt5	simpleAndcomplexASEs	covlow	PSI	5-10%	0.15
rMATS	Alt5	simpleAndcomplexASEs	covlow	PSI	10-25%	0.25
rMATS	Alt5	simpleAndcomplexASEs	covlow	PSI	>25%	0.15
VAST-TOOLS	Alt5	simpleAndcomplexASEs	covhigh	PSI	<1%	0.263021
VAST-TOOLS	Alt5	simpleAndcomplexASEs	covhigh	PSI	1-5%	0.375
VAST-TOOLS	Alt5	simpleAndcomplexASEs	covhigh	PSI	5-10%	0.130208
VAST-TOOLS	Alt5	simpleAndcomplexASEs	covhigh	PSI	10-25%	0.145833
VAST-TOOLS	Alt5	simpleAndcomplexASEs	covhigh	PSI	>25%	0.0859375
MAJIQ	Alt5	simpleAndcomplexASEs	covhigh	PSI	<1%	0.0885417
MAJIQ	Alt5	simpleAndcomplexASEs	covhigh	PSI	1-5%	0.322917
MAJIQ	Alt5	simpleAndcomplexASEs	covhigh	PSI	5-10%	0.177083
MAJIQ	Alt5	simpleAndcomplexASEs	covhigh	PSI	10-25%	0.192708
MAJIQ	Alt5	simpleAndcomplexASEs	covhigh	PSI	>25%	0.21875
MISO	Alt5	simpleAndcomplexASEs	covhigh	PSI	<1%	0.135417
MISO	Alt5	simpleAndcomplexASEs	covhigh	PSI	1-5%	0.208333
MISO	Alt5	simpleAndcomplexASEs	covhigh	PSI	5-10%	0.106771
MISO	Alt5	simpleAndcomplexASEs	covhigh	PSI	10-25%	0.223958
MISO	Alt5	simpleAndcomplexASEs	covhigh	PSI	>25%	0.325521
rMATS	Alt5	simpleAndcomplexASEs	covhigh	PSI	<1%	0.0989583
rMATS	Alt5	simpleAndcomplexASEs	covhigh	PSI	1-5%	0.335938
rMATS	Alt5	simpleAndcomplexASEs	covhigh	PSI	5-10%	0.190104
rMATS	Alt5	simpleAndcomplexASEs	covhigh	PSI	10-25%	0.216146
rMATS	Alt5	simpleAndcomplexASEs	covhigh	PSI	>25%	0.158854
VAST-TOOLS	Alt5	simpleAndcomplexASEs	covall	PSI	<1%	0.25
VAST-TOOLS	Alt5	simpleAndcomplexASEs	covall	PSI	1-5%	0.381188
VAST-TOOLS	Alt5	simpleAndcomplexASEs	covall	PSI	5-10%	0.14604
VAST-TOOLS	Alt5	simpleAndcomplexASEs	covall	PSI	10-25%	0.138614
VAST-TOOLS	Alt5	simpleAndcomplexASEs	covall	PSI	>25%	0.0841584
MAJIQ	Alt5	simpleAndcomplexASEs	covall	PSI	<1%	0.0841584
MAJIQ	Alt5	simpleAndcomplexASEs	covall	PSI	1-5%	0.311881
MAJIQ	Alt5	simpleAndcomplexASEs	covall	PSI	5-10%	0.180693
MAJIQ	Alt5	simpleAndcomplexASEs	covall	PSI	10-25%	0.190594
MAJIQ	Alt5	simpleAndcomplexASEs	covall	PSI	>25%	0.232673
MISO	Alt5	simpleAndcomplexASEs	covall	PSI	<1%	0.131188
MISO	Alt5	simpleAndcomplexASEs	covall	PSI	1-5%	0.207921
MISO	Alt5	simpleAndcomplexASEs	covall	PSI	5-10%	0.106436
MISO	Alt5	simpleAndcomplexASEs	covall	PSI	10-25%	0.227723
MISO	Alt5	simpleAndcomplexASEs	covall	PSI	>25%	0.326733
rMATS	Alt5	simpleAndcomplexASEs	covall	PSI	<1%	0.10396
rMATS	Alt5	simpleAndcomplexASEs	covall	PSI	1-5%	0.331683
rMATS	Alt5	simpleAndcomplexASEs	covall	PSI	5-10%	0.188119
rMATS	Alt5	simpleAndcomplexASEs	covall	PSI	10-25%	0.217822
rMATS	Alt5	simpleAndcomplexASEs	covall	PSI	>25%	0.158416
VAST-TOOLS	Alt5	simpleASEs	covlow	dPSI	<1%	0
VAST-TOOLS	Alt5	simpleASEs	covlow	dPSI	1-5%	0.6
VAST-TOOLS	Alt5	simpleASEs	covlow	dPSI	5-10%	0.2
VAST-TOOLS	Alt5	simpleASEs	covlow	dPSI	10-25%	0.2
VAST-TOOLS	Alt5	simpleASEs	covlow	dPSI	>25%	0
MAJIQ	Alt5	simpleASEs	covlow	dPSI	<1%	0
MAJIQ	Alt5	simpleASEs	covlow	dPSI	1-5%	0.2
MAJIQ	Alt5	simpleASEs	covlow	dPSI	5-10%	0.3
MAJIQ	Alt5	simpleASEs	covlow	dPSI	10-25%	0.4
MAJIQ	Alt5	simpleASEs	covlow	dPSI	>25%	0.1
MISO	Alt5	simpleASEs	covlow	dPSI	<1%	0
MISO	Alt5	simpleASEs	covlow	dPSI	1-5%	0
MISO	Alt5	simpleASEs	covlow	dPSI	5-10%	0.4
MISO	Alt5	simpleASEs	covlow	dPSI	10-25%	0.2
MISO	Alt5	simpleASEs	covlow	dPSI	>25%	0.4
rMATS	Alt5	simpleASEs	covlow	dPSI	<1%	0
rMATS	Alt5	simpleASEs	covlow	dPSI	1-5%	0.2
rMATS	Alt5	simpleASEs	covlow	dPSI	5-10%	0.2
rMATS	Alt5	simpleASEs	covlow	dPSI	10-25%	0.4
rMATS	Alt5	simpleASEs	covlow	dPSI	>25%	0.2
VAST-TOOLS	Alt5	simpleASEs	covhigh	dPSI	<1%	0.208333
VAST-TOOLS	Alt5	simpleASEs	covhigh	dPSI	1-5%	0.583333
VAST-TOOLS	Alt5	simpleASEs	covhigh	dPSI	5-10%	0.125
VAST-TOOLS	Alt5	simpleASEs	covhigh	dPSI	10-25%	0.0555556
VAST-TOOLS	Alt5	simpleASEs	covhigh	dPSI	>25%	0.0277778
MAJIQ	Alt5	simpleASEs	covhigh	dPSI	<1%	0.180556
MAJIQ	Alt5	simpleASEs	covhigh	dPSI	1-5%	0.333333
MAJIQ	Alt5	simpleASEs	covhigh	dPSI	5-10%	0.201389
MAJIQ	Alt5	simpleASEs	covhigh	dPSI	10-25%	0.152778
MAJIQ	Alt5	simpleASEs	covhigh	dPSI	>25%	0.131944
MISO	Alt5	simpleASEs	covhigh	dPSI	<1%	0.0763889
MISO	Alt5	simpleASEs	covhigh	dPSI	1-5%	0.361111
MISO	Alt5	simpleASEs	covhigh	dPSI	5-10%	0.173611
MISO	Alt5	simpleASEs	covhigh	dPSI	10-25%	0.0694444
MISO	Alt5	simpleASEs	covhigh	dPSI	>25%	0.319444
rMATS	Alt5	simpleASEs	covhigh	dPSI	<1%	0.180556
rMATS	Alt5	simpleASEs	covhigh	dPSI	1-5%	0.402778
rMATS	Alt5	simpleASEs	covhigh	dPSI	5-10%	0.25
rMATS	Alt5	simpleASEs	covhigh	dPSI	10-25%	0.0972222
rMATS	Alt5	simpleASEs	covhigh	dPSI	>25%	0.0694444
VAST-TOOLS	Alt5	simpleASEs	covall	dPSI	<1%	0.194805
VAST-TOOLS	Alt5	simpleASEs	covall	dPSI	1-5%	0.584416
VAST-TOOLS	Alt5	simpleASEs	covall	dPSI	5-10%	0.12987
VAST-TOOLS	Alt5	simpleASEs	covall	dPSI	10-25%	0.0649351
VAST-TOOLS	Alt5	simpleASEs	covall	dPSI	>25%	0.025974
MAJIQ	Alt5	simpleASEs	covall	dPSI	<1%	0.168831
MAJIQ	Alt5	simpleASEs	covall	dPSI	1-5%	0.324675
MAJIQ	Alt5	simpleASEs	covall	dPSI	5-10%	0.207792
MAJIQ	Alt5	simpleASEs	covall	dPSI	10-25%	0.168831
MAJIQ	Alt5	simpleASEs	covall	dPSI	>25%	0.12987
MISO	Alt5	simpleASEs	covall	dPSI	<1%	0.0714286
MISO	Alt5	simpleASEs	covall	dPSI	1-5%	0.337662
MISO	Alt5	simpleASEs	covall	dPSI	5-10%	0.188312
MISO	Alt5	simpleASEs	covall	dPSI	10-25%	0.0779221
MISO	Alt5	simpleASEs	covall	dPSI	>25%	0.324675
rMATS	Alt5	simpleASEs	covall	dPSI	<1%	0.168831
rMATS	Alt5	simpleASEs	covall	dPSI	1-5%	0.38961
rMATS	Alt5	simpleASEs	covall	dPSI	5-10%	0.246753
rMATS	Alt5	simpleASEs	covall	dPSI	10-25%	0.116883
rMATS	Alt5	simpleASEs	covall	dPSI	>25%	0.0779221
VAST-TOOLS	Alt5	complexASEs	covlow	dPSI	<1%	0
VAST-TOOLS	Alt5	complexASEs	covlow	dPSI	1-5%	0.333333
VAST-TOOLS	Alt5	complexASEs	covlow	dPSI	5-10%	0.333333
VAST-TOOLS	Alt5	complexASEs	covlow	dPSI	10-25%	0.333333
VAST-TOOLS	Alt5	complexASEs	covlow	dPSI	>25%	0
MAJIQ	Alt5	complexASEs	covlow	dPSI	<1%	0
MAJIQ	Alt5	complexASEs	covlow	dPSI	1-5%	0
MAJIQ	Alt5	complexASEs	covlow	dPSI	5-10%	0
MAJIQ	Alt5	complexASEs	covlow	dPSI	10-25%	0.333333
MAJIQ	Alt5	complexASEs	covlow	dPSI	>25%	0.666667
MISO	Alt5	complexASEs	covlow	dPSI	<1%	0
MISO	Alt5	complexASEs	covlow	dPSI	1-5%	0.333333
MISO	Alt5	complexASEs	covlow	dPSI	5-10%	0
MISO	Alt5	complexASEs	covlow	dPSI	10-25%	0
MISO	Alt5	complexASEs	covlow	dPSI	>25%	0.666667
rMATS	Alt5	complexASEs	covlow	dPSI	<1%	0
rMATS	Alt5	complexASEs	covlow	dPSI	1-5%	0
rMATS	Alt5	complexASEs	covlow	dPSI	5-10%	0.666667
rMATS	Alt5	complexASEs	covlow	dPSI	10-25%	0.333333
rMATS	Alt5	complexASEs	covlow	dPSI	>25%	0
VAST-TOOLS	Alt5	complexASEs	covhigh	dPSI	<1%	0.0888889
VAST-TOOLS	Alt5	complexASEs	covhigh	dPSI	1-5%	0.333333
VAST-TOOLS	Alt5	complexASEs	covhigh	dPSI	5-10%	0.222222
VAST-TOOLS	Alt5	complexASEs	covhigh	dPSI	10-25%	0.288889
VAST-TOOLS	Alt5	complexASEs	covhigh	dPSI	>25%	0.0666667
MAJIQ	Alt5	complexASEs	covhigh	dPSI	<1%	0.0666667
MAJIQ	Alt5	complexASEs	covhigh	dPSI	1-5%	0.177778
MAJIQ	Alt5	complexASEs	covhigh	dPSI	5-10%	0.244444
MAJIQ	Alt5	complexASEs	covhigh	dPSI	10-25%	0.266667
MAJIQ	Alt5	complexASEs	covhigh	dPSI	>25%	0.244444
MISO	Alt5	complexASEs	covhigh	dPSI	<1%	0.0666667
MISO	Alt5	complexASEs	covhigh	dPSI	1-5%	0.244444
MISO	Alt5	complexASEs	covhigh	dPSI	5-10%	0.0888889
MISO	Alt5	complexASEs	covhigh	dPSI	10-25%	0.333333
MISO	Alt5	complexASEs	covhigh	dPSI	>25%	0.266667
rMATS	Alt5	complexASEs	covhigh	dPSI	<1%	0.0888889
rMATS	Alt5	complexASEs	covhigh	dPSI	1-5%	0.288889
rMATS	Alt5	complexASEs	covhigh	dPSI	5-10%	0.266667
rMATS	Alt5	complexASEs	covhigh	dPSI	10-25%	0.2
rMATS	Alt5	complexASEs	covhigh	dPSI	>25%	0.155556
VAST-TOOLS	Alt5	complexASEs	covall	dPSI	<1%	0.0833333
VAST-TOOLS	Alt5	complexASEs	covall	dPSI	1-5%	0.333333
VAST-TOOLS	Alt5	complexASEs	covall	dPSI	5-10%	0.229167
VAST-TOOLS	Alt5	complexASEs	covall	dPSI	10-25%	0.291667
VAST-TOOLS	Alt5	complexASEs	covall	dPSI	>25%	0.0625
MAJIQ	Alt5	complexASEs	covall	dPSI	<1%	0.0625
MAJIQ	Alt5	complexASEs	covall	dPSI	1-5%	0.166667
MAJIQ	Alt5	complexASEs	covall	dPSI	5-10%	0.229167
MAJIQ	Alt5	complexASEs	covall	dPSI	10-25%	0.270833
MAJIQ	Alt5	complexASEs	covall	dPSI	>25%	0.270833
MISO	Alt5	complexASEs	covall	dPSI	<1%	0.0625
MISO	Alt5	complexASEs	covall	dPSI	1-5%	0.25
MISO	Alt5	complexASEs	covall	dPSI	5-10%	0.0833333
MISO	Alt5	complexASEs	covall	dPSI	10-25%	0.3125
MISO	Alt5	complexASEs	covall	dPSI	>25%	0.291667
rMATS	Alt5	complexASEs	covall	dPSI	<1%	0.0833333
rMATS	Alt5	complexASEs	covall	dPSI	1-5%	0.270833
rMATS	Alt5	complexASEs	covall	dPSI	5-10%	0.291667
rMATS	Alt5	complexASEs	covall	dPSI	10-25%	0.208333
rMATS	Alt5	complexASEs	covall	dPSI	>25%	0.145833
VAST-TOOLS	Alt5	simpleAndcomplexASEs	covlow	dPSI	<1%	0
VAST-TOOLS	Alt5	simpleAndcomplexASEs	covlow	dPSI	1-5%	0.538462
VAST-TOOLS	Alt5	simpleAndcomplexASEs	covlow	dPSI	5-10%	0.230769
VAST-TOOLS	Alt5	simpleAndcomplexASEs	covlow	dPSI	10-25%	0.230769
VAST-TOOLS	Alt5	simpleAndcomplexASEs	covlow	dPSI	>25%	0
MAJIQ	Alt5	simpleAndcomplexASEs	covlow	dPSI	<1%	0
MAJIQ	Alt5	simpleAndcomplexASEs	covlow	dPSI	1-5%	0.153846
MAJIQ	Alt5	simpleAndcomplexASEs	covlow	dPSI	5-10%	0.230769
MAJIQ	Alt5	simpleAndcomplexASEs	covlow	dPSI	10-25%	0.384615
MAJIQ	Alt5	simpleAndcomplexASEs	covlow	dPSI	>25%	0.230769
MISO	Alt5	simpleAndcomplexASEs	covlow	dPSI	<1%	0
MISO	Alt5	simpleAndcomplexASEs	covlow	dPSI	1-5%	0.0769231
MISO	Alt5	simpleAndcomplexASEs	covlow	dPSI	5-10%	0.307692
MISO	Alt5	simpleAndcomplexASEs	covlow	dPSI	10-25%	0.153846
MISO	Alt5	simpleAndcomplexASEs	covlow	dPSI	>25%	0.461538
rMATS	Alt5	simpleAndcomplexASEs	covlow	dPSI	<1%	0
rMATS	Alt5	simpleAndcomplexASEs	covlow	dPSI	1-5%	0.153846
rMATS	Alt5	simpleAndcomplexASEs	covlow	dPSI	5-10%	0.307692
rMATS	Alt5	simpleAndcomplexASEs	covlow	dPSI	10-25%	0.384615
rMATS	Alt5	simpleAndcomplexASEs	covlow	dPSI	>25%	0.153846
VAST-TOOLS	Alt5	simpleAndcomplexASEs	covhigh	dPSI	<1%	0.179894
VAST-TOOLS	Alt5	simpleAndcomplexASEs	covhigh	dPSI	1-5%	0.52381
VAST-TOOLS	Alt5	simpleAndcomplexASEs	covhigh	dPSI	5-10%	0.148148
VAST-TOOLS	Alt5	simpleAndcomplexASEs	covhigh	dPSI	10-25%	0.111111
VAST-TOOLS	Alt5	simpleAndcomplexASEs	covhigh	dPSI	>25%	0.037037
MAJIQ	Alt5	simpleAndcomplexASEs	covhigh	dPSI	<1%	0.153439
MAJIQ	Alt5	simpleAndcomplexASEs	covhigh	dPSI	1-5%	0.296296
MAJIQ	Alt5	simpleAndcomplexASEs	covhigh	dPSI	5-10%	0.21164
MAJIQ	Alt5	simpleAndcomplexASEs	covhigh	dPSI	10-25%	0.179894
MAJIQ	Alt5	simpleAndcomplexASEs	covhigh	dPSI	>25%	0.15873
MISO	Alt5	simpleAndcomplexASEs	covhigh	dPSI	<1%	0.0740741
MISO	Alt5	simpleAndcomplexASEs	covhigh	dPSI	1-5%	0.333333
MISO	Alt5	simpleAndcomplexASEs	covhigh	dPSI	5-10%	0.153439
MISO	Alt5	simpleAndcomplexASEs	covhigh	dPSI	10-25%	0.132275
MISO	Alt5	simpleAndcomplexASEs	covhigh	dPSI	>25%	0.306878
rMATS	Alt5	simpleAndcomplexASEs	covhigh	dPSI	<1%	0.15873
rMATS	Alt5	simpleAndcomplexASEs	covhigh	dPSI	1-5%	0.375661
rMATS	Alt5	simpleAndcomplexASEs	covhigh	dPSI	5-10%	0.253968
rMATS	Alt5	simpleAndcomplexASEs	covhigh	dPSI	10-25%	0.121693
rMATS	Alt5	simpleAndcomplexASEs	covhigh	dPSI	>25%	0.0899471
VAST-TOOLS	Alt5	simpleAndcomplexASEs	covall	dPSI	<1%	0.168317
VAST-TOOLS	Alt5	simpleAndcomplexASEs	covall	dPSI	1-5%	0.524752
VAST-TOOLS	Alt5	simpleAndcomplexASEs	covall	dPSI	5-10%	0.153465
VAST-TOOLS	Alt5	simpleAndcomplexASEs	covall	dPSI	10-25%	0.118812
VAST-TOOLS	Alt5	simpleAndcomplexASEs	covall	dPSI	>25%	0.0346535
MAJIQ	Alt5	simpleAndcomplexASEs	covall	dPSI	<1%	0.143564
MAJIQ	Alt5	simpleAndcomplexASEs	covall	dPSI	1-5%	0.287129
MAJIQ	Alt5	simpleAndcomplexASEs	covall	dPSI	5-10%	0.212871
MAJIQ	Alt5	simpleAndcomplexASEs	covall	dPSI	10-25%	0.193069
MAJIQ	Alt5	simpleAndcomplexASEs	covall	dPSI	>25%	0.163366
MISO	Alt5	simpleAndcomplexASEs	covall	dPSI	<1%	0.0693069
MISO	Alt5	simpleAndcomplexASEs	covall	dPSI	1-5%	0.316832
MISO	Alt5	simpleAndcomplexASEs	covall	dPSI	5-10%	0.163366
MISO	Alt5	simpleAndcomplexASEs	covall	dPSI	10-25%	0.133663
MISO	Alt5	simpleAndcomplexASEs	covall	dPSI	>25%	0.316832
rMATS	Alt5	simpleAndcomplexASEs	covall	dPSI	<1%	0.148515
rMATS	Alt5	simpleAndcomplexASEs	covall	dPSI	1-5%	0.361386
rMATS	Alt5	simpleAndcomplexASEs	covall	dPSI	5-10%	0.257426
rMATS	Alt5	simpleAndcomplexASEs	covall	dPSI	10-25%	0.138614
rMATS	Alt5	simpleAndcomplexASEs	covall	dPSI	>25%	0.0940594
VAST-TOOLS	Alt5	simpleASEs	covlow	PSI	<1%	0
VAST-TOOLS	Alt5	simpleASEs	covlow	PSI	1-5%	0.5
VAST-TOOLS	Alt5	simpleASEs	covlow	PSI	5-10%	0.5
VAST-TOOLS	Alt5	simpleASEs	covlow	PSI	10-25%	0
VAST-TOOLS	Alt5	simpleASEs	covlow	PSI	>25%	0
MAJIQ	Alt5	simpleASEs	covlow	PSI	<1%	0
MAJIQ	Alt5	simpleASEs	covlow	PSI	1-5%	0.125
MAJIQ	Alt5	simpleASEs	covlow	PSI	5-10%	0.3125
MAJIQ	Alt5	simpleASEs	covlow	PSI	10-25%	0.125
MAJIQ	Alt5	simpleASEs	covlow	PSI	>25%	0.4375
MISO	Alt5	simpleASEs	covlow	PSI	<1%	0
MISO	Alt5	simpleASEs	covlow	PSI	1-5%	0.25
MISO	Alt5	simpleASEs	covlow	PSI	5-10%	0.125
MISO	Alt5	simpleASEs	covlow	PSI	10-25%	0.25
MISO	Alt5	simpleASEs	covlow	PSI	>25%	0.375
rMATS	Alt5	simpleASEs	covlow	PSI	<1%	0.25
rMATS	Alt5	simpleASEs	covlow	PSI	1-5%	0.25
rMATS	Alt5	simpleASEs	covlow	PSI	5-10%	0.125
rMATS	Alt5	simpleASEs	covlow	PSI	10-25%	0.25
rMATS	Alt5	simpleASEs	covlow	PSI	>25%	0.125
VAST-TOOLS	Alt5	simpleASEs	covhigh	PSI	<1%	0.308219
VAST-TOOLS	Alt5	simpleASEs	covhigh	PSI	1-5%	0.431507
VAST-TOOLS	Alt5	simpleASEs	covhigh	PSI	5-10%	0.123288
VAST-TOOLS	Alt5	simpleASEs	covhigh	PSI	10-25%	0.0890411
VAST-TOOLS	Alt5	simpleASEs	covhigh	PSI	>25%	0.0479452
MAJIQ	Alt5	simpleASEs	covhigh	PSI	<1%	0.0924658
MAJIQ	Alt5	simpleASEs	covhigh	PSI	1-5%	0.369863
MAJIQ	Alt5	simpleASEs	covhigh	PSI	5-10%	0.208904
MAJIQ	Alt5	simpleASEs	covhigh	PSI	10-25%	0.143836
MAJIQ	Alt5	simpleASEs	covhigh	PSI	>25%	0.184932
MISO	Alt5	simpleASEs	covhigh	PSI	<1%	0.143836
MISO	Alt5	simpleASEs	covhigh	PSI	1-5%	0.226027
MISO	Alt5	simpleASEs	covhigh	PSI	5-10%	0.0958904
MISO	Alt5	simpleASEs	covhigh	PSI	10-25%	0.226027
MISO	Alt5	simpleASEs	covhigh	PSI	>25%	0.308219
rMATS	Alt5	simpleASEs	covhigh	PSI	<1%	0.109589
rMATS	Alt5	simpleASEs	covhigh	PSI	1-5%	0.376712
rMATS	Alt5	simpleASEs	covhigh	PSI	5-10%	0.191781
rMATS	Alt5	simpleASEs	covhigh	PSI	10-25%	0.215753
rMATS	Alt5	simpleASEs	covhigh	PSI	>25%	0.106164
VAST-TOOLS	Alt5	simpleASEs	covall	PSI	<1%	0.292208
VAST-TOOLS	Alt5	simpleASEs	covall	PSI	1-5%	0.435065
VAST-TOOLS	Alt5	simpleASEs	covall	PSI	5-10%	0.142857
VAST-TOOLS	Alt5	simpleASEs	covall	PSI	10-25%	0.0844156
VAST-TOOLS	Alt5	simpleASEs	covall	PSI	>25%	0.0454545
MAJIQ	Alt5	simpleASEs	covall	PSI	<1%	0.0876623
MAJIQ	Alt5	simpleASEs	covall	PSI	1-5%	0.357143
MAJIQ	Alt5	simpleASEs	covall	PSI	5-10%	0.214286
MAJIQ	Alt5	simpleASEs	covall	PSI	10-25%	0.142857
MAJIQ	Alt5	simpleASEs	covall	PSI	>25%	0.198052
MISO	Alt5	simpleASEs	covall	PSI	<1%	0.136364
MISO	Alt5	simpleASEs	covall	PSI	1-5%	0.227273
MISO	Alt5	simpleASEs	covall	PSI	5-10%	0.0974026
MISO	Alt5	simpleASEs	covall	PSI	10-25%	0.227273
MISO	Alt5	simpleASEs	covall	PSI	>25%	0.311688
rMATS	Alt5	simpleASEs	covall	PSI	<1%	0.116883
rMATS	Alt5	simpleASEs	covall	PSI	1-5%	0.37013
rMATS	Alt5	simpleASEs	covall	PSI	5-10%	0.188312
rMATS	Alt5	simpleASEs	covall	PSI	10-25%	0.217532
rMATS	Alt5	simpleASEs	covall	PSI	>25%	0.107143
VAST-TOOLS	Alt5	complexASEs	covlow	PSI	<1%	0
VAST-TOOLS	Alt5	complexASEs	covlow	PSI	1-5%	0.5
VAST-TOOLS	Alt5	complexASEs	covlow	PSI	5-10%	0.25
VAST-TOOLS	Alt5	complexASEs	covlow	PSI	10-25%	0
VAST-TOOLS	Alt5	complexASEs	covlow	PSI	>25%	0.25
MAJIQ	Alt5	complexASEs	covlow	PSI	<1%	0
MAJIQ	Alt5	complexASEs	covlow	PSI	1-5%	0
MAJIQ	Alt5	complexASEs	covlow	PSI	5-10%	0
MAJIQ	Alt5	complexASEs	covlow	PSI	10-25%	0.25
MAJIQ	Alt5	complexASEs	covlow	PSI	>25%	0.75
MISO	Alt5	complexASEs	covlow	PSI	<1%	0.25
MISO	Alt5	complexASEs	covlow	PSI	1-5%	0
MISO	Alt5	complexASEs	covlow	PSI	5-10%	0
MISO	Alt5	complexASEs	covlow	PSI	10-25%	0.5
MISO	Alt5	complexASEs	covlow	PSI	>25%	0.25
rMATS	Alt5	complexASEs	covlow	PSI	<1%	0
rMATS	Alt5	complexASEs	covlow	PSI	1-5%	0.25
rMATS	Alt5	complexASEs	covlow	PSI	5-10%	0.25
rMATS	Alt5	complexASEs	covlow	PSI	10-25%	0.25
rMATS	Alt5	complexASEs	covlow	PSI	>25%	0.25
VAST-TOOLS	Alt5	complexASEs	covhigh	PSI	<1%	0.119565
VAST-TOOLS	Alt5	complexASEs	covhigh	PSI	1-5%	0.195652
VAST-TOOLS	Alt5	complexASEs	covhigh	PSI	5-10%	0.152174
VAST-TOOLS	Alt5	complexASEs	covhigh	PSI	10-25%	0.326087
VAST-TOOLS	Alt5	complexASEs	covhigh	PSI	>25%	0.206522
MAJIQ	Alt5	complexASEs	covhigh	PSI	<1%	0.076087
MAJIQ	Alt5	complexASEs	covhigh	PSI	1-5%	0.173913
MAJIQ	Alt5	complexASEs	covhigh	PSI	5-10%	0.076087
MAJIQ	Alt5	complexASEs	covhigh	PSI	10-25%	0.347826
MAJIQ	Alt5	complexASEs	covhigh	PSI	>25%	0.326087
MISO	Alt5	complexASEs	covhigh	PSI	<1%	0.108696
MISO	Alt5	complexASEs	covhigh	PSI	1-5%	0.152174
MISO	Alt5	complexASEs	covhigh	PSI	5-10%	0.141304
MISO	Alt5	complexASEs	covhigh	PSI	10-25%	0.217391
MISO	Alt5	complexASEs	covhigh	PSI	>25%	0.380435
rMATS	Alt5	complexASEs	covhigh	PSI	<1%	0.0652174
rMATS	Alt5	complexASEs	covhigh	PSI	1-5%	0.206522
rMATS	Alt5	complexASEs	covhigh	PSI	5-10%	0.184783
rMATS	Alt5	complexASEs	covhigh	PSI	10-25%	0.217391
rMATS	Alt5	complexASEs	covhigh	PSI	>25%	0.326087
VAST-TOOLS	Alt5	complexASEs	covall	PSI	<1%	0.114583
VAST-TOOLS	Alt5	complexASEs	covall	PSI	1-5%	0.208333
VAST-TOOLS	Alt5	complexASEs	covall	PSI	5-10%	0.15625
VAST-TOOLS	Alt5	complexASEs	covall	PSI	10-25%	0.3125
VAST-TOOLS	Alt5	complexASEs	covall	PSI	>25%	0.208333
MAJIQ	Alt5	complexASEs	covall	PSI	<1%	0.0729167
MAJIQ	Alt5	complexASEs	covall	PSI	1-5%	0.166667
MAJIQ	Alt5	complexASEs	covall	PSI	5-10%	0.0729167
MAJIQ	Alt5	complexASEs	covall	PSI	10-25%	0.34375
MAJIQ	Alt5	complexASEs	covall	PSI	>25%	0.34375
MISO	Alt5	complexASEs	covall	PSI	<1%	0.114583
MISO	Alt5	complexASEs	covall	PSI	1-5%	0.145833
MISO	Alt5	complexASEs	covall	PSI	5-10%	0.135417
MISO	Alt5	complexASEs	covall	PSI	10-25%	0.229167
MISO	Alt5	complexASEs	covall	PSI	>25%	0.375
rMATS	Alt5	complexASEs	covall	PSI	<1%	0.0625
rMATS	Alt5	complexASEs	covall	PSI	1-5%	0.208333
rMATS	Alt5	complexASEs	covall	PSI	5-10%	0.1875
rMATS	Alt5	complexASEs	covall	PSI	10-25%	0.21875
rMATS	Alt5	complexASEs	covall	PSI	>25%	0.322917
VAST-TOOLS	Alt5	simpleAndcomplexASEs	covlow	PSI	<1%	0
VAST-TOOLS	Alt5	simpleAndcomplexASEs	covlow	PSI	1-5%	0.5
VAST-TOOLS	Alt5	simpleAndcomplexASEs	covlow	PSI	5-10%	0.45
VAST-TOOLS	Alt5	simpleAndcomplexASEs	covlow	PSI	10-25%	0
VAST-TOOLS	Alt5	simpleAndcomplexASEs	covlow	PSI	>25%	0.05
MAJIQ	Alt5	simpleAndcomplexASEs	covlow	PSI	<1%	0
MAJIQ	Alt5	simpleAndcomplexASEs	covlow	PSI	1-5%	0.1
MAJIQ	Alt5	simpleAndcomplexASEs	covlow	PSI	5-10%	0.25
MAJIQ	Alt5	simpleAndcomplexASEs	covlow	PSI	10-25%	0.15
MAJIQ	Alt5	simpleAndcomplexASEs	covlow	PSI	>25%	0.5
MISO	Alt5	simpleAndcomplexASEs	covlow	PSI	<1%	0.05
MISO	Alt5	simpleAndcomplexASEs	covlow	PSI	1-5%	0.2
MISO	Alt5	simpleAndcomplexASEs	covlow	PSI	5-10%	0.1
MISO	Alt5	simpleAndcomplexASEs	covlow	PSI	10-25%	0.3
MISO	Alt5	simpleAndcomplexASEs	covlow	PSI	>25%	0.35
rMATS	Alt5	simpleAndcomplexASEs	covlow	PSI	<1%	0.2
rMATS	Alt5	simpleAndcomplexASEs	covlow	PSI	1-5%	0.25
rMATS	Alt5	simpleAndcomplexASEs	covlow	PSI	5-10%	0.15
rMATS	Alt5	simpleAndcomplexASEs	covlow	PSI	10-25%	0.25
rMATS	Alt5	simpleAndcomplexASEs	covlow	PSI	>25%	0.15
VAST-TOOLS	Alt5	simpleAndcomplexASEs	covhigh	PSI	<1%	0.263021
VAST-TOOLS	Alt5	simpleAndcomplexASEs	covhigh	PSI	1-5%	0.375
VAST-TOOLS	Alt5	simpleAndcomplexASEs	covhigh	PSI	5-10%	0.130208
VAST-TOOLS	Alt5	simpleAndcomplexASEs	covhigh	PSI	10-25%	0.145833
VAST-TOOLS	Alt5	simpleAndcomplexASEs	covhigh	PSI	>25%	0.0859375
MAJIQ	Alt5	simpleAndcomplexASEs	covhigh	PSI	<1%	0.0885417
MAJIQ	Alt5	simpleAndcomplexASEs	covhigh	PSI	1-5%	0.322917
MAJIQ	Alt5	simpleAndcomplexASEs	covhigh	PSI	5-10%	0.177083
MAJIQ	Alt5	simpleAndcomplexASEs	covhigh	PSI	10-25%	0.192708
MAJIQ	Alt5	simpleAndcomplexASEs	covhigh	PSI	>25%	0.21875
MISO	Alt5	simpleAndcomplexASEs	covhigh	PSI	<1%	0.135417
MISO	Alt5	simpleAndcomplexASEs	covhigh	PSI	1-5%	0.208333
MISO	Alt5	simpleAndcomplexASEs	covhigh	PSI	5-10%	0.106771
MISO	Alt5	simpleAndcomplexASEs	covhigh	PSI	10-25%	0.223958
MISO	Alt5	simpleAndcomplexASEs	covhigh	PSI	>25%	0.325521
rMATS	Alt5	simpleAndcomplexASEs	covhigh	PSI	<1%	0.0989583
rMATS	Alt5	simpleAndcomplexASEs	covhigh	PSI	1-5%	0.335938
rMATS	Alt5	simpleAndcomplexASEs	covhigh	PSI	5-10%	0.190104
rMATS	Alt5	simpleAndcomplexASEs	covhigh	PSI	10-25%	0.216146
rMATS	Alt5	simpleAndcomplexASEs	covhigh	PSI	>25%	0.158854
VAST-TOOLS	Alt5	simpleAndcomplexASEs	covall	PSI	<1%	0.25
VAST-TOOLS	Alt5	simpleAndcomplexASEs	covall	PSI	1-5%	0.381188
VAST-TOOLS	Alt5	simpleAndcomplexASEs	covall	PSI	5-10%	0.14604
VAST-TOOLS	Alt5	simpleAndcomplexASEs	covall	PSI	10-25%	0.138614
VAST-TOOLS	Alt5	simpleAndcomplexASEs	covall	PSI	>25%	0.0841584
MAJIQ	Alt5	simpleAndcomplexASEs	covall	PSI	<1%	0.0841584
MAJIQ	Alt5	simpleAndcomplexASEs	covall	PSI	1-5%	0.311881
MAJIQ	Alt5	simpleAndcomplexASEs	covall	PSI	5-10%	0.180693
MAJIQ	Alt5	simpleAndcomplexASEs	covall	PSI	10-25%	0.190594
MAJIQ	Alt5	simpleAndcomplexASEs	covall	PSI	>25%	0.232673
MISO	Alt5	simpleAndcomplexASEs	covall	PSI	<1%	0.131188
MISO	Alt5	simpleAndcomplexASEs	covall	PSI	1-5%	0.207921
MISO	Alt5	simpleAndcomplexASEs	covall	PSI	5-10%	0.106436
MISO	Alt5	simpleAndcomplexASEs	covall	PSI	10-25%	0.227723
MISO	Alt5	simpleAndcomplexASEs	covall	PSI	>25%	0.326733
rMATS	Alt5	simpleAndcomplexASEs	covall	PSI	<1%	0.10396
rMATS	Alt5	simpleAndcomplexASEs	covall	PSI	1-5%	0.331683
rMATS	Alt5	simpleAndcomplexASEs	covall	PSI	5-10%	0.188119
rMATS	Alt5	simpleAndcomplexASEs	covall	PSI	10-25%	0.217822
rMATS	Alt5	simpleAndcomplexASEs	covall	PSI	>25%	0.158416
VAST-TOOLS	Alt5	simpleASEs	covlow	dPSI	<1%	0
VAST-TOOLS	Alt5	simpleASEs	covlow	dPSI	1-5%	0.6
VAST-TOOLS	Alt5	simpleASEs	covlow	dPSI	5-10%	0.2
VAST-TOOLS	Alt5	simpleASEs	covlow	dPSI	10-25%	0.2
VAST-TOOLS	Alt5	simpleASEs	covlow	dPSI	>25%	0
MAJIQ	Alt5	simpleASEs	covlow	dPSI	<1%	0
MAJIQ	Alt5	simpleASEs	covlow	dPSI	1-5%	0.2
MAJIQ	Alt5	simpleASEs	covlow	dPSI	5-10%	0.3
MAJIQ	Alt5	simpleASEs	covlow	dPSI	10-25%	0.4
MAJIQ	Alt5	simpleASEs	covlow	dPSI	>25%	0.1
MISO	Alt5	simpleASEs	covlow	dPSI	<1%	0
MISO	Alt5	simpleASEs	covlow	dPSI	1-5%	0
MISO	Alt5	simpleASEs	covlow	dPSI	5-10%	0.4
MISO	Alt5	simpleASEs	covlow	dPSI	10-25%	0.2
MISO	Alt5	simpleASEs	covlow	dPSI	>25%	0.4
rMATS	Alt5	simpleASEs	covlow	dPSI	<1%	0
rMATS	Alt5	simpleASEs	covlow	dPSI	1-5%	0.2
rMATS	Alt5	simpleASEs	covlow	dPSI	5-10%	0.2
[truncated: 802 more rows]
