# Supplementary material for: An atlas of alternative splicing profiles and functional associations reveals new regulatory programs and genes that simultaneously express multiple major isoforms
Source: HighWire-hosted journal article supplement (doi:10.1101/gr.220962.117), 2017-08-30
Supplement: Supplemental_Table_S3.xlsx [file Supplemental_Table_S3.xlsx]

## Sheet: Supplemental Table S3
Supplemental Table S3 – PSI values from RNA-seq and RT-PCRs for all events used for validation. Information about all the AS events used for validations from human, mouse and chicken, and corresponding PSIs from RNA-seq (as estimated in VastDB) and RT-PCR data (from the original sources). For each entry, the following information is provided: official gene symbol, VastDB event identifier, length …
Gene_name	Event_ID	Exon_length	PSI_RT_PCR	PSI_RNA_SEQ	SAMPLE_PCR	vast-tools_Q_score	VastDB_sample	Pubmed_ID	Figure_source	Species
MAP2	GgaEX0003576	93	59.46	58.27	Wt/Wt (DT40)	SOK,SOK,SOK,OK,S@294.26,210.74	CL_DT40_b	26293963	Gueroussov et al Fig 4	Gga
LOC772071	GgaEX0012211	60	37.9	22.72	Wt/Wt (DT40)	SOK,SOK,SOK,OK,S@131.32,446.68	CL_DT40_b	26293963	Gueroussov et al Fig 4	Gga
ITSN1	GgaEX0023566	180	41.43	28.21	Wt/Wt (DT40)	SOK,SOK,SOK,OK,S@28.21,71.79	CL_DT40_b	26293963	Gueroussov et al Fig 4	Gga
PFKFB2	GgaEX0001208	171	8.72	28.35	Wt/Wt (DT40)	SOK,SOK,SOK,B2,S@63.22,159.78	CL_DT40_b	26293963	Gueroussov et al Fig S11	Gga
EPB41	GgaEX0001505	117	66.91	52.19	Wt/Wt (DT40)	SOK,SOK,SOK,OK,S@400.30,366.70	CL_DT40_b	26293963	Gueroussov et al Fig S11	Gga
MED23	GgaEX0003568	18	9.93	20.68	Wt/Wt (DT40)	SOK,SOK,SOK,B1,S@42.60,163.40	CL_DT40_b	26293963	Gueroussov et al Fig S11	Gga
TPM1	GgaEX0004616	76	2.26	9.83	Wt/Wt (DT40)	SOK,SOK,SOK,OK,C3@59.86,549.14	CL_DT40_b	26293963	Gueroussov et al Fig S11	Gga
MYO5A	GgaEX0006276	81	49.18	41.31	Wt/Wt (DT40)	SOK,SOK,SOK,OK,S@59.90,85.10	CL_DT40_b	26293963	Gueroussov et al Fig S11	Gga
RHBDD1	GgaEX0006785	23	11.08	8.34	Wt/Wt (DT40)	OK,OK,OK,OK,S@7.59,83.41	CL_DT40_b	26293963	Gueroussov et al Fig S11	Gga
PTBP2	GgaEX0007746	34	86.5	74.07	Wt/Wt (DT40)	SOK,SOK,SOK,OK,S@114.81,40.19	CL_DT40_b	26293963	Gueroussov et al Fig S11	Gga
FLNB	GgaEX0007951	75	36.96	25	Wt/Wt (DT40)	SOK,SOK,SOK,OK,S@61.25,183.75	CL_DT40_b	26293963	Gueroussov et al Fig S11	Gga
ARHGAP17	GgaEX0008424	48	88.95	57.01	Wt/Wt (DT40)	SOK,SOK,N,B2,C3@268.52,202.48	CL_DT40_b	26293963	Gueroussov et al Fig S11	Gga
C16orf28	GgaEX0009193	231	84.3	63.09	Wt/Wt (DT40)	SOK,SOK,SOK,B1,S@206.30,120.70	CL_DT40_b	26293963	Gueroussov et al Fig S11	Gga
SMPD4	GgaEX0009204	90	22.06	28.38	Wt/Wt (DT40)	SOK,SOK,SOK,OK,S@109.26,275.74	CL_DT40_b	26293963	Gueroussov et al Fig S11	Gga
PCNT	GgaEX0010006	21	18.42	26.35	Wt/Wt (DT40)	SOK,SOK,SOK,OK,S@28.99,81.01	CL_DT40_b	26293963	Gueroussov et al Fig S11	Gga
MDM1	GgaEX0014685	39	84.5	57.69	Wt/Wt (DT40)	SOK,SOK,SOK,OK,S@143.65,105.35	CL_DT40_b	26293963	Gueroussov et al Fig S11	Gga
OSBPL9	GgaEX0015737	39	93.56	77.68	Wt/Wt (DT40)	SOK,SOK,SOK,OK,S@119.63,34.37	CL_DT40_b	26293963	Gueroussov et al Fig S11	Gga
DNAJC13	GgaEX0017606	15	40.11	38.58	Wt/Wt (DT40)	SOK,SOK,SOK,na,na@81.79,130.21	CL_DT40_b	26293963	Gueroussov et al Fig S11	Gga
R3HDM1	GgaEX0018433	99	4.53	10.87	Wt/Wt (DT40)	SOK,SOK,SOK,OK,S@56.31,461.69	CL_DT40_b	26293963	Gueroussov et al Fig S11	Gga
WNK1	GgaEX0019656	474	69.19	58.11	Wt/Wt (DT40)	SOK,SOK,SOK,OK,S@239.99,173.01	CL_DT40_b	26293963	Gueroussov et al Fig S11	Gga
PCM1	GgaEX0020237	57	88.16	50.06	Wt/Wt (DT40)	SOK,SOK,SOK,OK,S@145.17,144.83	CL_DT40_b	26293963	Gueroussov et al Fig S11	Gga
PACSIN2	GgaEX0020888	117	78.28	54.62	Wt/Wt (DT40)	SOK,SOK,SOK,OK,S@320.07,265.93	CL_DT40_b	26293963	Gueroussov et al Fig S11	Gga
THOC1	GgaEX0021801	24	48.33	62.45	Wt/Wt (DT40)	SOK,SOK,SOK,OK,S@663.22,398.78	CL_DT40_b	26293963	Gueroussov et al Fig S11	Gga
HMBOX1	GgaEX0024635	81	65.09	40.49	Wt/Wt (DT40)	OK,OK,VLOW,OK,C2@33.61,49.39	CL_DT40_b	26293963	Gueroussov et al Fig S11	Gga
ARNT	GgaEX0000728	45	62.04	44.85	Wt/Wt (DT40)	SOK,SOK,SOK,OK,S@481.24,591.76	CL_DT40_b	26293963	Gueroussov et al Fig S12	Gga
IWS1	GgaEX0002194	159	7.94	31.35	Wt/Wt (DT40)	SOK,SOK,SOK,OK,S@435.45,953.55	CL_DT40_b	26293963	Gueroussov et al Fig S12	Gga
EIF4G2	GgaEX0007784	114	29.26	35.08	Wt/Wt (DT40)	SOK,SOK,SOK,OK,S@2632.05,4870.95	CL_DT40_b	26293963	Gueroussov et al Fig S12	Gga
MBNL3	GgaEX0008588	95	90.06	69.95	Wt/Wt (DT40)	SOK,SOK,SOK,OK,S@895.36,384.64	CL_DT40_b	26293963	Gueroussov et al Fig S12	Gga
SETD5	GgaEX0009361	106	88.77	73.95	Wt/Wt (DT40)	SOK,SOK,SOK,OK,S@138.29,48.71	CL_DT40_b	26293963	Gueroussov et al Fig S12	Gga
CLPX	GgaEX0010378	42	84.56	50.5	Wt/Wt (DT40)	SOK,SOK,SOK,OK,S@456.01,446.99	CL_DT40_b	26293963	Gueroussov et al Fig S12	Gga
C21orf70	GgaEX0010663	42	9.54	26.84	Wt/Wt (DT40)	SOK,SOK,SOK,B2,S@310.27,845.73	CL_DT40_b	26293963	Gueroussov et al Fig S12	Gga
SRGAP3	GgaEX0012162	328	14.18	44.2	Wt/Wt (DT40)	SOK,SOK,SOK,OK,S@304.98,385.02	CL_DT40_b	26293963	Gueroussov et al Fig S12	Gga
FUBP1	GgaEX0013094	63	42.04	30.99	Wt/Wt (DT40)	SOK,SOK,SOK,OK,S@159.91,356.09	CL_DT40_b	26293963	Gueroussov et al Fig S12	Gga
XRCC3	GgaEX0017343	47	92.01	61.89	Wt/Wt (DT40)	SOK,SOK,SOK,OK,S@276.03,169.97	CL_DT40_b	26293963	Gueroussov et al Fig S12	Gga
PUF60	GgaEX0020817	51	95.46	64.35	Wt/Wt (DT40)	SOK,SOK,SOK,OK,S@1696.91,940.09	CL_DT40_b	26293963	Gueroussov et al Fig S12	Gga
FNBP4	GgaEX0021315	64	86.88	71.76	Wt/Wt (DT40)	SOK,SOK,SOK,B1,S@842.46,331.54	CL_DT40_b	26293963	Gueroussov et al Fig S12	Gga
LSM1	HsaEX0036834	116	94	89.82	Heart	SOK,SOK,SOK,OK,S@520.96,59.04	Heart_a	23258890	Barbosa-Morais et al Fig S14	Hsa
LSM1	HsaEX0036834	116	94	90.62	Heart	SOK,SOK,SOK,B1,S@1477.11,152.89	Heart_b	23258890	Barbosa-Morais et al Fig S14	Hsa
LSM1	HsaEX0036834	116	94	90.08	Heart	SOK,SOK,SOK,OK,S@1755.66,193.34	Heart_c	23258890	Barbosa-Morais et al Fig S14	Hsa
LSM1	HsaEX0036834	116	94	91.59	Kidney	SOK,SOK,SOK,OK,S@424.98,39.02	Kidney_b	23258890	Barbosa-Morais et al Fig S14	Hsa
LSM1	HsaEX0036834	116	94	86.64	Kidney	SOK,SOK,SOK,OK,S@1543.92,238.08	Kidney_c	23258890	Barbosa-Morais et al Fig S14	Hsa
LSM1	HsaEX0036834	116	94	88.73	Kidney	OK,OK,OK,OK,S@53.24,6.76	Kidney_d	23258890	Barbosa-Morais et al Fig S14	Hsa
LSM1	HsaEX0036834	116	83	82.48	Liver	SOK,SOK,SOK,OK,S@142.69,30.31	Liver_a	23258890	Barbosa-Morais et al Fig S14	Hsa
LSM1	HsaEX0036834	116	83	76.61	Liver	SOK,SOK,SOK,OK,S@586.83,179.17	Liver_b	23258890	Barbosa-Morais et al Fig S14	Hsa
LSM1	HsaEX0036834	116	83	92.93	Liver	SOK,SOK,SOK,OK,S@212.81,16.19	Liver_c	23258890	Barbosa-Morais et al Fig S14	Hsa
LSM1	HsaEX0036834	116	86	79.57	Muscle	SOK,SOK,SOK,OK,S@165.51,42.49	Muscle_b	23258890	Barbosa-Morais et al Fig S14	Hsa
LSM1	HsaEX0036834	116	86	80.68	Muscle	SOK,SOK,SOK,OK,S@223.48,53.52	Muscle_d	23258890	Barbosa-Morais et al Fig S14	Hsa
LSM1	HsaEX0036834	116	86	81.05	Muscle	SOK,SOK,SOK,OK,S@256.93,60.07	Muscle_e	23258890	Barbosa-Morais et al Fig S14	Hsa
LSM1	HsaEX0036834	116	80	87.47	Whole_brain	SOK,SOK,SOK,OK,S@280.78,40.22	Whole_Brain_b	23258890	Barbosa-Morais et al Fig S14	Hsa
STAU2	HsaEX0062380	131	32	40.14	Heart	SOK,SOK,SOK,OK,S@109.58,163.42	Heart_a	23258890	Barbosa-Morais et al Fig S14	Hsa
STAU2	HsaEX0062380	131	32	66.63	Heart	SOK,SOK,SOK,B1,S@1122.72,562.28	Heart_b	23258890	Barbosa-Morais et al Fig S14	Hsa
STAU2	HsaEX0062380	131	32	59.42	Heart	SOK,SOK,SOK,OK,S@626.29,427.71	Heart_c	23258890	Barbosa-Morais et al Fig S14	Hsa
STAU2	HsaEX0062380	131	8	24.06	Kidney	SOK,SOK,SOK,OK,S@25.74,81.26	Kidney_b	23258890	Barbosa-Morais et al Fig S14	Hsa
STAU2	HsaEX0062380	131	8	26.13	Kidney	SOK,SOK,SOK,OK,S@79.96,226.04	Kidney_c	23258890	Barbosa-Morais et al Fig S14	Hsa
STAU2	HsaEX0062380	131	8	33.03	Kidney	OK,SOK,OK,OK,S@28.41,57.59	Kidney_d	23258890	Barbosa-Morais et al Fig S14	Hsa
STAU2	HsaEX0062380	131	21	40.11	Liver	SOK,SOK,SOK,B1,S@154.02,229.98	Liver_b	23258890	Barbosa-Morais et al Fig S14	Hsa
STAU2	HsaEX0062380	131	21	29.48	Liver	SOK,SOK,SOK,OK,S@35.38,84.62	Liver_c	23258890	Barbosa-Morais et al Fig S14	Hsa
STAU2	HsaEX0062380	131	88	57.66	Muscle	OK,SOK,OK,B1,S@42.67,31.33	Muscle_b	23258890	Barbosa-Morais et al Fig S14	Hsa
STAU2	HsaEX0062380	131	88	74.78	Muscle	SOK,SOK,SOK,OK,S@234.06,78.94	Muscle_d	23258890	Barbosa-Morais et al Fig S14	Hsa
STAU2	HsaEX0062380	131	88	71.39	Muscle	SOK,SOK,SOK,OK,S@238.44,95.56	Muscle_e	23258890	Barbosa-Morais et al Fig S14	Hsa
STAU2	HsaEX0062380	131	19	30	Whole_brain	SOK,SOK,SOK,OK,S@85.80,200.20	Whole_Brain_b	23258890	Barbosa-Morais et al Fig S14	Hsa
MYCBP2	HsaEX0040930	108	91.35	73.01	siControl (293T)	SOK,SOK,SOK,OK,S@262.11,96.89	CL_293T	26293963	Gueroussov et al Fig S2	Hsa
PTBP2	HsaEX0050732	34	71.63	47.36	siControl (293T)	SOK,SOK,SOK,OK,S@51.15,56.85	CL_293T	26293963	Gueroussov et al Fig S2	Hsa
ZNF711	HsaEX0074249	143	49.22	37.84	siControl (293T)	OK,OK,OK,OK,S@18.16,29.84	CL_293T	26293963	Gueroussov et al Fig S2	Hsa
BAZ2B	HsaEX0007736	27	95.6	93.43	siControl (HeLa)	OK,SOK,OK,B1,S@64.47,4.53	CL_HeLa	23739326	Han et al Fig 3	Hsa
BAZ2B	HsaEX0007736	27	0	8.05	H9	OK,OK,OK,Bn,S@6.20,70.80	ESC_H9_a	23739326	Han et al Fig 3	Hsa
BAZ2B	HsaEX0007736	27	0	1.95	H9	SOK,SOK,SOK,OK,S@2.63,132.37	ESC_H9_b	23739326	Han et al Fig 3	Hsa
FOXP1	HsaEX0026275	170	0	0	siControl (HeLa)	SOK,SOK,N,Bn,C3@0.00,173.00	CL_HeLa	23739326	Han et al Fig 3	Hsa
FOXP1	HsaEX0026275	170	45.2	39.33	H9	OK,OK,LOW,B1,C2@24.38,37.62	ESC_H9_a	23739326	Han et al Fig 3	Hsa
FOXP1	HsaEX0026275	170	45.2	34.78	H9	SOK,SOK,OK,OK,C2@43.13,80.87	ESC_H9_b	23739326	Han et al Fig 3	Hsa
MAP3K4	HsaEX0037571	150	13	10.64	siControl (HeLa)	OK,OK,OK,OK,S@8.30,69.70	CL_HeLa	23739326	Han et al Fig 3	Hsa
MAP3K4	HsaEX0037571	150	100	93.75	H9	OK,OK,OK,OK,S@87.19,5.81	ESC_H9_a	23739326	Han et al Fig 3	Hsa
MAP3K4	HsaEX0037571	150	100	93.85	H9	LOW,LOW,LOW,B2,S@118.25,7.75	ESC_H9_b	23739326	Han et al Fig 3	Hsa
MTA1	HsaEX0040388	36	99	95.12	siControl (HeLa)	SOK,SOK,SOK,OK,S@340.53,17.47	CL_HeLa	23739326	Han et al Fig 3	Hsa
MTA1	HsaEX0040388	36	25.9	15.63	H9	SOK,SOK,SOK,OK,S@47.52,256.48	ESC_H9_a	23739326	Han et al Fig 3	Hsa
MTA1	HsaEX0040388	36	25.9	24.4	H9	OK,OK,OK,B2,S@7.81,24.19	ESC_H9_b	23739326	Han et al Fig 3	Hsa
PLEKHM2	HsaEX0048420	60	70.7	52.12	siControl (HeLa)	SOK,SOK,SOK,OK,S@205.35,188.65	CL_HeLa	23739326	Han et al Fig 3	Hsa
PLEKHM2	HsaEX0048420	60	27.1	12.82	H9	OK,OK,OK,OK,S@11.28,76.72	ESC_H9_a	23739326	Han et al Fig 3	Hsa
PLEKHM2	HsaEX0048420	60	27.1	19.51	H9	OK,OK,OK,OK,S@9.56,39.44	ESC_H9_b	23739326	Han et al Fig 3	Hsa
SLK	HsaEX0060174	93	4.1	3.42	siControl (HeLa)	SOK,SOK,SOK,OK,S@10.33,291.67	CL_HeLa	23739326	Han et al Fig 3	Hsa
SLK	HsaEX0060174	93	70.2	57.78	H9	OK,OK,OK,OK,S@41.02,29.98	ESC_H9_a	23739326	Han et al Fig 3	Hsa
SLK	HsaEX0060174	93	70.2	86.02	H9	SOK,SOK,SOK,OK,S@148.81,24.19	ESC_H9_b	23739326	Han et al Fig 3	Hsa
BAZ2B	HsaEX0007736	27	0.1	8.05	H9	OK,OK,OK,Bn,S@6.20,70.80	ESC_H9_a	23739326	Han et al Fig S2	Hsa
BAZ2B	HsaEX0007736	27	0.1	1.95	H9	SOK,SOK,SOK,OK,S@2.63,132.37	ESC_H9_b	23739326	Han et al Fig S2	Hsa
BAZ2B	HsaEX0007736	27	58.8	50.64	Fetal brain	SOK,SOK,SOK,B1,S@357.52,348.48	Embr_Forebrain_9_12wpc	23739326	Han et al Fig S2	Hsa
BAZ2B	HsaEX0007736	27	99.5	97.15	Adult heart	SOK,SOK,SOK,OK,S@233.16,6.84	Heart_b	23739326	Han et al Fig S2	Hsa
BAZ2B	HsaEX0007736	27	99.5	99.24	Adult heart	SOK,SOK,SOK,OK,S@148.86,1.14	Heart_c	23739326	Han et al Fig S2	Hsa
BAZ2B	HsaEX0007736	27	64.4	41.76	Adult liver	SOK,SOK,SOK,OK,S@54.71,76.29	Liver_b	23739326	Han et al Fig S2	Hsa
BAZ2B	HsaEX0007736	27	64.4	42.86	Adult liver	OK,OK,OK,B1,S@22.29,29.71	Liver_c	23739326	Han et al Fig S2	Hsa
BAZ2B	HsaEX0007736	27	68.6	17.17	Adult stomach	OK,OK,OK,B2,S@8.07,38.93	Stomach_a	23739326	Han et al Fig S2	Hsa
BAZ2B	HsaEX0007736	27	68.6	44.1	Adult stomach	SOK,SOK,SOK,OK,S@51.16,64.84	Stomach_b	23739326	Han et al Fig S2	Hsa
BAZ2B	HsaEX0007736	27	99.3	60.49	Adult brain	LOW,OK,LOW,B1,S@26.62,17.38	Whole_Brain_b	23739326	Han et al Fig S2	Hsa
MAP3K4	HsaEX0037571	150	100	93.75	H9	OK,OK,OK,OK,S@87.19,5.81	ESC_H9_a	23739326	Han et al Fig S2	Hsa
MAP3K4	HsaEX0037571	150	100	93.85	H9	LOW,LOW,LOW,B2,S@118.25,7.75	ESC_H9_b	23739326	Han et al Fig S2	Hsa
MAP3K4	HsaEX0037571	150	84.9	90.87	Fetal brain	SOK,SOK,SOK,OK,S@437.08,43.92	Embr_Forebrain_9_12wpc	23739326	Han et al Fig S2	Hsa
MAP3K4	HsaEX0037571	150	14.8	26.67	Adult heart	OK,OK,OK,OK,S@15.20,41.80	Heart_a	23739326	Han et al Fig S2	Hsa
MAP3K4	HsaEX0037571	150	14.8	29.21	Adult heart	SOK,SOK,SOK,OK,S@76.24,184.76	Heart_b	23739326	Han et al Fig S2	Hsa
MAP3K4	HsaEX0037571	150	14.8	15.18	Adult heart	SOK,SOK,SOK,OK,S@44.93,251.07	Heart_c	23739326	Han et al Fig S2	Hsa
MAP3K4	HsaEX0037571	150	11.1	40.14	Adult liver	SOK,SOK,SOK,OK,S@41.34,61.66	Liver_b	23739326	Han et al Fig S2	Hsa
MAP3K4	HsaEX0037571	150	11.1	13.51	Adult liver	LOW,LOW,LOW,B1,S@2.84,18.16	Liver_c	23739326	Han et al Fig S2	Hsa
MAP3K4	HsaEX0037571	150	31.6	57.22	Adult stomach	SOK,SOK,SOK,B2,S@168.23,125.77	Stomach_a	23739326	Han et al Fig S2	Hsa
MAP3K4	HsaEX0037571	150	31.6	33.33	Adult stomach	OK,OK,OK,OK,S@29.33,58.67	Stomach_b	23739326	Han et al Fig S2	Hsa
MAP3K4	HsaEX0037571	150	63.3	61.54	Adult brain	LOW,LOW,LOW,OK,S@25.85,16.15	Whole_Brain_b	23739326	Han et al Fig S2	Hsa
MTA1	HsaEX0040388	36	19.1	15.63	H9	SOK,SOK,SOK,OK,S@47.52,256.48	ESC_H9_a	23739326	Han et al Fig S2	Hsa
MTA1	HsaEX0040388	36	19.1	24.4	H9	OK,OK,OK,B2,S@7.81,24.19	ESC_H9_b	23739326	Han et al Fig S2	Hsa
MTA1	HsaEX0040388	36	83.9	69.68	Fetal brain	SOK,SOK,SOK,B2,S@591.58,257.42	Embr_Forebrain_9_12wpc	23739326	Han et al Fig S2	Hsa
MTA1	HsaEX0040388	36	99.4	100	Adult heart	SOK,SOK,SOK,OK,S@209.00,0.00	Heart_a	23739326	Han et al Fig S2	Hsa
MTA1	HsaEX0040388	36	99.4	98.6	Adult heart	SOK,SOK,SOK,OK,S@137.05,1.95	Heart_b	23739326	Han et al Fig S2	Hsa
MTA1	HsaEX0040388	36	99.4	98.43	Adult heart	SOK,SOK,SOK,OK,S@494.12,7.88	Heart_c	23739326	Han et al Fig S2	Hsa
MTA1	HsaEX0040388	36	100	100	Adult liver	OK,SOK,OK,OK,S@95.00,0.00	Liver_a	23739326	Han et al Fig S2	Hsa
MTA1	HsaEX0040388	36	100	100	Adult liver	OK,SOK,OK,OK,S@74.00,0.00	Liver_b	23739326	Han et al Fig S2	Hsa
MTA1	HsaEX0040388	36	100	100	Adult liver	OK,OK,OK,OK,S@47.00,0.00	Liver_c	23739326	Han et al Fig S2	Hsa
MTA1	HsaEX0040388	36	99.4	98.7	Adult stomach	SOK,SOK,SOK,OK,S@149.04,1.96	Stomach_b	23739326	Han et al Fig S2	Hsa
MTA1	HsaEX0040388	36	98.2	94.89	Adult brain	SOK,SOK,SOK,B1,S@193.58,10.42	Whole_Brain_b	23739326	Han et al Fig S2	Hsa
PLEKHM2	HsaEX0048420	60	17.4	12.82	H9	OK,OK,OK,OK,S@11.28,76.72	ESC_H9_a	23739326	Han et al Fig S2	Hsa
PLEKHM2	HsaEX0048420	60	17.4	19.51	H9	OK,OK,OK,OK,S@9.56,39.44	ESC_H9_b	23739326	Han et al Fig S2	Hsa
PLEKHM2	HsaEX0048420	60	14.7	11.28	Fetal brain	SOK,SOK,SOK,OK,S@58.43,459.57	Embr_Forebrain_9_12wpc	23739326	Han et al Fig S2	Hsa
PLEKHM2	HsaEX0048420	60	96.4	94.87	Adult heart	SOK,SOK,SOK,OK,S@648.91,35.09	Heart_a	23739326	Han et al Fig S2	Hsa
PLEKHM2	HsaEX0048420	60	96.4	96.25	Adult heart	SOK,SOK,SOK,OK,S@504.35,19.65	Heart_b	23739326	Han et al Fig S2	Hsa
PLEKHM2	HsaEX0048420	60	96.4	94.64	Adult heart	SOK,SOK,SOK,OK,S@1856.84,105.16	Heart_c	23739326	Han et al Fig S2	Hsa
PLEKHM2	HsaEX0048420	60	81.4	85.71	Adult liver	OK,OK,OK,B1,S@55.71,9.29	Liver_a	23739326	Han et al Fig S2	Hsa
PLEKHM2	HsaEX0048420	60	81.4	80.11	Adult liver	SOK,SOK,SOK,OK,S@130.58,32.42	Liver_b	23739326	Han et al Fig S2	Hsa
PLEKHM2	HsaEX0048420	60	81.4	76.92	Adult liver	OK,OK,OK,OK,S@53.07,15.93	Liver_c	23739326	Han et al Fig S2	Hsa
PLEKHM2	HsaEX0048420	60	75.1	44.06	Adult stomach	SOK,SOK,SOK,OK,S@45.38,57.62	Stomach_a	23739326	Han et al Fig S2	Hsa
PLEKHM2	HsaEX0048420	60	75.1	45.31	Adult stomach	SOK,SOK,SOK,OK,S@122.79,148.21	Stomach_b	23739326	Han et al Fig S2	Hsa
PLEKHM2	HsaEX0048420	60	54.7	39.09	Adult brain	SOK,SOK,SOK,OK,S@179.42,279.58	Whole_Brain_b	23739326	Han et al Fig S2	Hsa
FOXP1	HsaEX0026275	170	0	0	siControl (HeLa)	SOK,SOK,N,Bn,C3@0.00,173.00	CL_HeLa	23739326	Han et al Fig S5	Hsa
MAP3K4	HsaEX0037571	150	15.1	10.64	siControl (HeLa)	OK,OK,OK,OK,S@8.30,69.70	CL_HeLa	23739326	Han et al Fig S5	Hsa
MTA1	HsaEX0040388	36	99.1	95.12	siControl (HeLa)	SOK,SOK,SOK,OK,S@340.53,17.47	CL_HeLa	23739326	Han et al Fig S5	Hsa
PLEKHM2	HsaEX0048420	60	71.7	52.12	siControl (HeLa)	SOK,SOK,SOK,OK,S@205.35,188.65	CL_HeLa	23739326	Han et al Fig S5	Hsa
CRTC2	HsaEX0017344	67	0	0.28	siControl (HeLa)	SOK,SOK,SOK,Bn,S@0.50,176.50	CL_HeLa	23739326	Han et al Fig S6	Hsa
CRTC2	HsaEX0017344	67	35.4	28.3	H9	OK,OK,OK,B1,S@19.24,48.76	ESC_H9_a	23739326	Han et al Fig S6	Hsa
GOLGA2	HsaEX0027951	81	35.9	42.66	siControl (HeLa)	SOK,SOK,SOK,OK,S@149.31,200.69	CL_HeLa	23739326	Han et al Fig S6	Hsa
GOLGA2	HsaEX0027951	81	1	4	H9	OK,OK,OK,Bn,S@2.08,49.92	ESC_H9_a	23739326	Han et al Fig S6	Hsa
MAP3K4	HsaEX0037571	150	12.3	10.64	siControl (HeLa)	OK,OK,OK,OK,S@8.30,69.70	CL_HeLa	23739326	Han et al Fig S6	Hsa
MGRN1	HsaEX0039140	66	66.7	64.29	siControl (HeLa)	SOK,SOK,SOK,OK,S@192.23,106.77	CL_HeLa	23739326	Han et al Fig S6	Hsa
MGRN1	HsaEX0039140	66	33.7	36.79	H9	SOK,SOK,SOK,OK,S@53.35,91.65	ESC_H9_a	23739326	Han et al Fig S6	Hsa
MTA1	HsaEX0040388	36	98.9	95.12	siControl (HeLa)	SOK,SOK,SOK,OK,S@340.53,17.47	CL_HeLa	23739326	Han et al Fig S6	Hsa
NUMA1	HsaEX0044209	42	43.6	35.68	siControl (HeLa)	SOK,SOK,SOK,B1,S@292.22,526.78	CL_HeLa	23739326	Han et al Fig S6	Hsa
NUMA1	HsaEX0044209	42	0	2.41	H9	SOK,SOK,SOK,B2,S@4.53,183.47	ESC_H9_a	23739326	Han et al Fig S6	Hsa
NUMA1	HsaEX0044209	42	0	6.28	H9	SOK,SOK,SOK,B1,S@9.48,141.52	ESC_H9_b	23739326	Han et al Fig S6	Hsa
NUMB	HsaEX0044216	144	36.2	33.86	siControl (HeLa)	SOK,SOK,SOK,OK,S@56.88,111.12	CL_HeLa	23739326	Han et al Fig S6	Hsa
NUMB	HsaEX0044216	144	49	65.28	H9	SOK,SOK,SOK,OK,S@77.68,41.32	ESC_H9_a	23739326	Han et al Fig S6	Hsa
PLEKHC1	HsaEX0048320	21	2.2	2.44	siControl (HeLa)	SOK,SOK,SOK,OK,S@9.93,397.07	CL_HeLa	23739326	Han et al Fig S6	Hsa
PLEKHC1	HsaEX0048320	21	91.9	93.55	H9	LOW,SOK,LOW,B1,S@58.94,4.06	ESC_H9_a	23739326	Han et al Fig S6	Hsa
PLEKHC1	HsaEX0048320	21	91.9	91.65	H9	SOK,SOK,SOK,OK,S@251.12,22.88	ESC_H9_b	23739326	Han et al Fig S6	Hsa
TBC1D23	HsaEX0063853	45	85.1	80	siControl (HeLa)	SOK,SOK,SOK,OK,S@100.80,25.20	CL_HeLa	23739326	Han et al Fig S6	Hsa
TBC1D23	HsaEX0063853	45	29.5	32.43	H9	OK,OK,OK,OK,S@15.89,33.11	ESC_H9_a	23739326	Han et al Fig S6	Hsa
TBC1D23	HsaEX0063853	45	29.5	31.67	H9	SOK,SOK,SOK,OK,S@100.08,215.92	ESC_H9_b	23739326	Han et al Fig S6	Hsa
TMEM63B	HsaEX0065925	39	100	96.8	siControl (HeLa)	SOK,SOK,SOK,OK,S@163.59,5.41	CL_HeLa	23739326	Han et al Fig S6	Hsa
TMEM63B	HsaEX0065925	39	8.7	6.57	H9	SOK,SOK,SOK,B1,S@10.38,147.62	ESC_H9_a	23739326	Han et al Fig S6	Hsa
TMEM63B	HsaEX0065925	39	8.7	24.34	H9	LOW,LOW,LOW,B1,S@6.57,20.43	ESC_H9_b	23739326	Han et al Fig S6	Hsa
WNK1	HsaEX0071560	279	13.3	46.3	siControl (HeLa)	SOK,SOK,SOK,OK,C1@302.34,350.66	CL_HeLa	23739326	Han et al Fig S6	Hsa
WNK1	HsaEX0071560	279	56.4	86.56	H9	SOK,SOK,SOK,OK,C1@236.31,36.69	ESC_H9_a	23739326	Han et al Fig S6	Hsa
WNK1	HsaEX0071560	279	56.4	88.61	H9	SOK,SOK,SOK,OK,C1@116.08,14.92	ESC_H9_b	23739326	Han et al Fig S6	Hsa
BAZ2B	HsaEX0007736	27	62.1	44.76	siControl (293T)	OK,OK,OK,B1,S@23.28,28.72	CL_293T	23739326	Han et al Fig S7	Hsa
CRTC2	HsaEX0017344	67	0	0	siControl (293T)	SOK,SOK,SOK,Bn,S@0.00,197.00	CL_293T	23739326	Han et al Fig S7	Hsa
MAP3K4	HsaEX0037571	150	9.7	26.9	siControl (293T)	OK,OK,OK,OK,S@24.75,67.25	CL_293T	23739326	Han et al Fig S7	Hsa
MTA1	HsaEX0040388	36	75.9	71.82	siControl (293T)	SOK,SOK,SOK,OK,S@216.90,85.10	CL_293T	23739326	Han et al Fig S7	Hsa
PLEKHM2	HsaEX0048420	60	42.8	31.19	siControl (293T)	SOK,SOK,SOK,OK,S@44.60,98.40	CL_293T	23739326	Han et al Fig S7	Hsa
SLK	HsaEX0060174	93	3.3	2.8	siControl (293T)	SOK,SOK,SOK,OK,S@7.20,249.80	CL_293T	23739326	Han et al Fig S7	Hsa
MED24	HsaEX0038645	57	12	15.43	CL_293T	SOK,SOK,SOK,OK,S@55.39,303.61	CL_293T	25219497	Raj et al Fig 1	Hsa
MEF2A	HsaEX0038690	24	1.41	1.41	CL_293T	OK,OK,OK,Bn,C1@1.03,71.97	CL_293T	25219497	Raj et al Fig 1	Hsa
MEF2D	HsaEX0038710	21	0	0	CL_293T	OK,OK,OK,Bn,S@0.00,46.00	CL_293T	25219497	Raj et al Fig 1	Hsa
SYNJ1	HsaEX0063208	24	0	0	CL_293T	OK,OK,OK,Bn,S@0.00,36.00	CL_293T	25219497	Raj et al Fig 1	Hsa
ARVCF	HsaEX0006131	18	0	0.92	CL_293T	OK,OK,OK,Bn,S@0.51,54.49	CL_293T	25219497	Raj et al Fig S1	Hsa
ASPH	HsaEX0006332	45	6	0.98	CL_293T	SOK,SOK,SOK,OK,S@4.03,406.97	CL_293T	25219497	Raj et al Fig S1	Hsa
CLASP2	HsaEX0015498	24	0	0	CL_293T	SOK,SOK,SOK,Bn,S@0.00,228.00	CL_293T	25219497	Raj et al Fig S1	Hsa
DAAM1	HsaEX0018410	30	0	0	CL_293T	OK,OK,OK,Bn,S@0.00,27.00	CL_293T	25219497	Raj et al Fig S1	Hsa
LASS6	HsaEX0035450	24	0	0	CL_293T	OK,OK,OK,Bn,S@0.00,79.00	CL_293T	25219497	Raj et al Fig S1	Hsa
MAST2	HsaEX0037980	21	7	20.27	CL_293T	OK,OK,OK,B1,S@10.95,43.05	CL_293T	25219497	Raj et al Fig S1	Hsa
NEO1	HsaEX0042591	33	13	9.25	CL_293T	OK,OK,OK,OK,C1@7.03,68.97	CL_293T	25219497	Raj et al Fig S1	Hsa
Epc2	MmuEX0017058	192	67	59.85	Heart	LOW,LOW,LOW,B1,S@32.32,21.68	Heart_a	23258890	Barbosa-Morais et al Fig S14	Mmu
Epc2	MmuEX0017058	192	67	78.93	Heart	OK,OK,OK,OK,S@52.09,13.91	Heart_c	23258890	Barbosa-Morais et al Fig S14	Mmu
Epc2	MmuEX0017058	192	83	72.36	Kidney	SOK,SOK,SOK,B1,S@73.81,28.19	Kidney_a	23258890	Barbosa-Morais et al Fig S14	Mmu
Epc2	MmuEX0017058	192	83	84.87	Kidney	SOK,SOK,SOK,B1,S@129.85,23.15	Kidney_b	23258890	Barbosa-Morais et al Fig S14	Mmu
Epc2	MmuEX0017058	192	83	69.45	Kidney	SOK,SOK,SOK,OK,S@93.76,41.24	Kidney_c	23258890	Barbosa-Morais et al Fig S14	Mmu
Epc2	MmuEX0017058	192	87	94.26	Liver	LOW,LOW,LOW,OK,S@31.11,1.89	Liver_a	23258890	Barbosa-Morais et al Fig S14	Mmu
Epc2	MmuEX0017058	192	87	88.72	Liver	OK,OK,OK,OK,S@71.86,9.14	Liver_b	23258890	Barbosa-Morais et al Fig S14	Mmu
Epc2	MmuEX0017058	192	87	92.12	Liver	OK,OK,OK,OK,S@87.51,7.49	Liver_c	23258890	Barbosa-Morais et al Fig S14	Mmu
Epc2	MmuEX0017058	192	80	77.3	Muscle	SOK,SOK,SOK,B1,S@98.94,29.06	Muscle_b	23258890	Barbosa-Morais et al Fig S14	Mmu
Epc2	MmuEX0017058	192	36	32.26	Brain	SOK,SOK,SOK,B1,S@43.87,92.13	Whole_Brain_a	23258890	Barbosa-Morais et al Fig S14	Mmu
Epc2	MmuEX0017058	192	36	47.99	Brain	SOK,SOK,SOK,OK,S@119.97,130.03	Whole_Brain_b	23258890	Barbosa-Morais et al Fig S14	Mmu
Hnrnpd	MmuEX0023100	147	45	43.51	Heart	SOK,SOK,SOK,OK,S@329.37,427.63	Heart_a	23258890	Barbosa-Morais et al Fig S14	Mmu
Hnrnpd	MmuEX0023100	147	45	65.1	Heart	SOK,SOK,SOK,B1,S@160.15,85.85	Heart_b	23258890	Barbosa-Morais et al Fig S14	Mmu
Hnrnpd	MmuEX0023100	147	45	66.08	Heart	SOK,SOK,SOK,OK,S@404.41,207.59	Heart_c	23258890	Barbosa-Morais et al Fig S14	Mmu
Hnrnpd	MmuEX0023100	147	45	53.95	Heart	SOK,SOK,SOK,OK,S@120.85,103.15	Heart_d	23258890	Barbosa-Morais et al Fig S14	Mmu
Hnrnpd	MmuEX0023100	147	39	51.72	Kidney	SOK,SOK,SOK,OK,S@523.41,488.59	Kidney_a	23258890	Barbosa-Morais et al Fig S14	Mmu
Hnrnpd	MmuEX0023100	147	39	55.64	Kidney	SOK,SOK,SOK,OK,S@841.28,670.72	Kidney_b	23258890	Barbosa-Morais et al Fig S14	Mmu
Hnrnpd	MmuEX0023100	147	39	61.46	Kidney	SOK,SOK,SOK,OK,S@695.11,435.89	Kidney_c	23258890	Barbosa-Morais et al Fig S14	Mmu
Hnrnpd	MmuEX0023100	147	35	39.88	Liver	SOK,SOK,SOK,OK,S@224.52,338.48	Liver_a	23258890	Barbosa-Morais et al Fig S14	Mmu
Hnrnpd	MmuEX0023100	147	35	46.45	Liver	SOK,SOK,SOK,OK,S@421.77,486.23	Liver_b	23258890	Barbosa-Morais et al Fig S14	Mmu
Hnrnpd	MmuEX0023100	147	35	55.11	Liver	SOK,SOK,SOK,OK,S@506.46,412.54	Liver_c	23258890	Barbosa-Morais et al Fig S14	Mmu
Hnrnpd	MmuEX0023100	147	37	41.38	Muscle	SOK,SOK,SOK,OK,S@84.83,120.17	Muscle_a	23258890	Barbosa-Morais et al Fig S14	Mmu
Hnrnpd	MmuEX0023100	147	37	49.46	Muscle	SOK,SOK,SOK,OK,S@345.23,352.77	Muscle_b	23258890	Barbosa-Morais et al Fig S14	Mmu
Hnrnpd	MmuEX0023100	147	37	56.36	Muscle	LOW,LOW,LOW,OK,S@24.23,18.77	Muscle_c	23258890	Barbosa-Morais et al Fig S14	Mmu
Hnrnpd	MmuEX0023100	147	62	71.06	Brain	SOK,SOK,SOK,OK,S@1050.27,427.73	Whole_Brain_a	23258890	Barbosa-Morais et al Fig S14	Mmu
Hnrnpd	MmuEX0023100	147	62	69.22	Brain	SOK,SOK,SOK,OK,S@1366.40,607.60	Whole_Brain_b	23258890	Barbosa-Morais et al Fig S14	Mmu
STAU2	MmuEX0045351	131	27	33.16	Heart	SOK,SOK,SOK,OK,S@86.55,174.45	Heart_a	23258890	Barbosa-Morais et al Fig S14	Mmu
STAU2	MmuEX0045351	131	27	23.21	Heart	SOK,SOK,SOK,B1,S@49.90,165.10	Heart_b	23258890	Barbosa-Morais et al Fig S14	Mmu
STAU2	MmuEX0045351	131	27	31.47	Heart	SOK,SOK,SOK,OK,S@95.98,209.02	Heart_c	23258890	Barbosa-Morais et al Fig S14	Mmu
STAU2	MmuEX0045351	131	27	30.16	Heart	SOK,SOK,SOK,B1,S@37.10,85.90	Heart_d	23258890	Barbosa-Morais et al Fig S14	Mmu
STAU2	MmuEX0045351	131	41	25	Kidney	SOK,SOK,SOK,OK,S@60.00,180.00	Kidney_a	23258890	Barbosa-Morais et al Fig S14	Mmu
STAU2	MmuEX0045351	131	41	43.08	Kidney	SOK,SOK,SOK,OK,S@77.97,103.03	Kidney_b	23258890	Barbosa-Morais et al Fig S14	Mmu
STAU2	MmuEX0045351	131	41	50.47	Kidney	SOK,SOK,SOK,OK,S@121.13,118.87	Kidney_c	23258890	Barbosa-Morais et al Fig S14	Mmu
STAU2	MmuEX0045351	131	29	37.5	Liver	OK,OK,OK,OK,S@20.62,34.38	Liver_a	23258890	Barbosa-Morais et al Fig S14	Mmu
STAU2	MmuEX0045351	131	29	32.35	Liver	OK,OK,OK,B1,S@14.56,30.44	Liver_b	23258890	Barbosa-Morais et al Fig S14	Mmu
STAU2	MmuEX0045351	131	29	53.68	Liver	OK,OK,OK,B1,S@39.19,33.81	Liver_c	23258890	Barbosa-Morais et al Fig S14	Mmu
STAU2	MmuEX0045351	131	13	30.51	Muscle	OK,OK,OK,B1,S@23.49,53.51	Muscle_a	23258890	Barbosa-Morais et al Fig S14	Mmu
STAU2	MmuEX0045351	131	13	29.8	Muscle	SOK,SOK,SOK,OK,S@123.97,292.03	Muscle_b	23258890	Barbosa-Morais et al Fig S14	Mmu
STAU2	MmuEX0045351	131	14	36.36	Brain	SOK,SOK,SOK,B1,S@190.89,334.11	Whole_Brain_a	23258890	Barbosa-Morais et al Fig S14	Mmu
STAU2	MmuEX0045351	131	14	20.39	Brain	SOK,SOK,SOK,OK,S@186.57,728.43	Whole_Brain_b	23258890	Barbosa-Morais et al Fig S14	Mmu
Add3	MmuEX0004045	96	7.9	6.15	SiControl (C2C12)	OK,OK,OK,OK,S@5.84,89.16	CL_C2C12_a	23739326	Han et al Fig S7	Mmu
Add3	MmuEX0004045	96	7.9	12.12	SiControl (C2C12)	OK,OK,OK,OK,S@4.48,32.52	CL_C2C12_b	23739326	Han et al Fig S7	Mmu
Mta1	MmuEX0029874	36	99.5	97.05	SiControl (C2C12)	SOK,SOK,SOK,OK,S@445.46,13.54	CL_C2C12_a	23739326	Han et al Fig S7	Mmu
Mta1	MmuEX0029874	36	99.5	98.47	SiControl (C2C12)	SOK,SOK,SOK,OK,S@872.44,13.56	CL_C2C12_b	23739326	Han et al Fig S7	Mmu
Mta1	MmuEX0029874	36	99.5	98.01	SiControl (C2C12)	SOK,SOK,SOK,OK,S@182.30,3.70	Myoblast_0h	23739326	Han et al Fig S7	Mmu
Numa1	MmuEX0032644	42	100	99.11	SiControl (C2C12)	SOK,SOK,SOK,OK,S@949.47,8.53	CL_C2C12_a	23739326	Han et al Fig S7	Mmu
Numa1	MmuEX0032644	42	100	99.18	SiControl (C2C12)	SOK,SOK,SOK,OK,S@522.68,4.32	CL_C2C12_b	23739326	Han et al Fig S7	Mmu
Numa1	MmuEX0032644	42	100	95.06	SiControl (C2C12)	SOK,SOK,SOK,OK,S@161.60,8.40	Myoblast_0h	23739326	Han et al Fig S7	Mmu
Ssbp3	MmuEX0045024	81	10.8	13.52	SiControl (C2C12)	SOK,SOK,SOK,OK,S@40.29,257.71	CL_C2C12_a	23739326	Han et al Fig S7	Mmu
Ssbp3	MmuEX0045024	81	10.8	10.56	SiControl (C2C12)	SOK,SOK,SOK,OK,S@28.20,238.80	CL_C2C12_b	23739326	Han et al Fig S7	Mmu
Ssbp3	MmuEX0045024	81	10.8	5.88	SiControl (C2C12)	SOK,SOK,SOK,B1,S@6.88,110.12	Myoblast_0h	23739326	Han et al Fig S7	Mmu
ABI1	MmuEX0003242	15	100	98.54	Cerebellum	SOK,SOK,SOK,na,na@625.73,9.27	Cerebellum_a	25525873	Irimia et al Fig S2	Mmu
ABI1	MmuEX0003242	15	100	99.63	Cerebellum	SOK,SOK,SOK,na,na@155.42,0.58	Cerebellum_b	25525873	Irimia et al Fig S2	Mmu
ABI1	MmuEX0003242	15	100	98.85	Cerebellum	SOK,SOK,SOK,na,na@1039.90,12.10	Cerebellum_c	25525873	Irimia et al Fig S2	Mmu
ABI1	MmuEX0003242	15	83	72.66	Heart	OK,OK,OK,na,na@49.41,18.59	Heart_a	25525873	Irimia et al Fig S2	Mmu
ABI1	MmuEX0003242	15	83	86.46	Heart	OK,SOK,OK,na,na@80.41,12.59	Heart_b	25525873	Irimia et al Fig S2	Mmu
ABI1	MmuEX0003242	15	83	85.64	Heart	SOK,SOK,SOK,na,na@101.91,17.09	Heart_c	25525873	Irimia et al Fig S2	Mmu
ABI1	MmuEX0003242	15	83	22.58	Heart	LOW,LOW,LOW,na,na@4.74,16.26	Heart_d	25525873	Irimia et al Fig S2	Mmu
ABI1	MmuEX0003242	15	22	25.99	Kidney	SOK,SOK,SOK,na,na@97.98,279.02	Kidney_a	25525873	Irimia et al Fig S2	Mmu
ABI1	MmuEX0003242	15	22	14.57	Kidney	SOK,SOK,SOK,na,na@57.41,336.59	Kidney_b	25525873	Irimia et al Fig S2	Mmu
ABI1	MmuEX0003242	15	22	28.09	Kidney	SOK,SOK,SOK,na,na@121.63,311.37	Kidney_c	25525873	Irimia et al Fig S2	Mmu
ABI1	MmuEX0003242	15	19	8.21	Liver	SOK,SOK,SOK,na,na@23.64,264.36	Liver_a	25525873	Irimia et al Fig S2	Mmu
ABI1	MmuEX0003242	15	19	8.94	Liver	SOK,SOK,SOK,na,na@18.51,188.49	Liver_b	25525873	Irimia et al Fig S2	Mmu
ABI1	MmuEX0003242	15	19	15.02	Liver	SOK,SOK,SOK,na,na@34.40,194.60	Liver_c	25525873	Irimia et al Fig S2	Mmu
ABI1	MmuEX0003242	15	83	93.4	Skeletal muscle	SOK,SOK,SOK,na,na@93.40,6.60	Muscle_b	25525873	Irimia et al Fig S2	Mmu
ABI1	MmuEX0003242	15	50	42.12	Spleen	SOK,SOK,SOK,na,na@195.02,267.98	Spleen_a	25525873	Irimia et al Fig S2	Mmu
ABI1	MmuEX0003242	15	50	40.41	Spleen	SOK,SOK,SOK,na,na@368.94,544.06	Spleen_b	25525873	Irimia et al Fig S2	Mmu
ABI1	MmuEX0003242	15	50	12.17	Spleen	SOK,SOK,SOK,na,na@13.27,95.73	Spleen_c	25525873	Irimia et al Fig S2	Mmu
ABI1	MmuEX0003242	15	12	5.34	Stomach	OK,OK,OK,na,na@3.42,60.58	Stomach_a	25525873	Irimia et al Fig S2	Mmu
ABI1	MmuEX0003242	15	12	9.62	Stomach	SOK,SOK,SOK,na,na@33.57,315.43	Stomach_b	25525873	Irimia et al Fig S2	Mmu
ABI1	MmuEX0003242	15	12	15.14	Stomach	SOK,SOK,SOK,na,na@50.72,284.28	Stomach_c	25525873	Irimia et al Fig S2	Mmu
ABI1	MmuEX0003242	15	73	63.31	Testis	SOK,SOK,SOK,na,na@90.53,52.47	Testis_a	25525873	Irimia et al Fig S2	Mmu
ABI1	MmuEX0003242	15	73	53.1	Testis	OK,SOK,OK,na,na@44.60,39.40	Testis_b	25525873	Irimia et al Fig S2	Mmu
ABI1	MmuEX0003242	15	73	66.04	Testis	SOK,SOK,SOK,na,na@313.69,161.31	Testis_c	25525873	Irimia et al Fig S2	Mmu
ABI1	MmuEX0003242	15	100	99.62	Hippocampus	SOK,SOK,SOK,na,na@298.86,1.14	Hippocampus	25525873	Irimia et al Fig S2	Mmu
DNM2	MmuEX0015304	12	63	52.39	Cerebellum	SOK,SOK,SOK,na,na@133.59,121.41	Cerebellum_a	25525873	Irimia et al Fig S2	Mmu
DNM2	MmuEX0015304	12	63	61.67	Cerebellum	OK,OK,OK,na,na@44.40,27.60	Cerebellum_b	25525873	Irimia et al Fig S2	Mmu
DNM2	MmuEX0015304	12	63	49.42	Cerebellum	SOK,SOK,SOK,na,na@208.55,213.45	Cerebellum_c	25525873	Irimia et al Fig S2	Mmu
DNM2	MmuEX0015304	12	45	25.38	Heart	SOK,SOK,SOK,na,na@52.79,155.21	Heart_a	25525873	Irimia et al Fig S2	Mmu
DNM2	MmuEX0015304	12	45	23.86	Heart	SOK,SOK,SOK,na,na@39.13,124.87	Heart_b	25525873	Irimia et al Fig S2	Mmu
DNM2	MmuEX0015304	12	45	25.48	Heart	SOK,SOK,SOK,na,na@55.55,162.45	Heart_c	25525873	Irimia et al Fig S2	Mmu
DNM2	MmuEX0015304	12	45	16.71	Heart	SOK,SOK,SOK,na,na@34.42,171.58	Heart_d	25525873	Irimia et al Fig S2	Mmu
DNM2	MmuEX0015304	12	81	86.29	Kidney	SOK,SOK,SOK,na,na@323.59,51.41	Kidney_a	25525873	Irimia et al Fig S2	Mmu
DNM2	MmuEX0015304	12	81	76.17	Kidney	SOK,SOK,SOK,na,na@491.30,153.70	Kidney_b	25525873	Irimia et al Fig S2	Mmu
DNM2	MmuEX0015304	12	81	79.22	Kidney	SOK,SOK,SOK,na,na@308.17,80.83	Kidney_c	25525873	Irimia et al Fig S2	Mmu
DNM2	MmuEX0015304	12	68	63.59	Liver	SOK,SOK,SOK,na,na@120.19,68.81	Liver_a	25525873	Irimia et al Fig S2	Mmu
DNM2	MmuEX0015304	12	68	65.36	Liver	SOK,SOK,SOK,na,na@213.73,113.27	Liver_b	25525873	Irimia et al Fig S2	Mmu
DNM2	MmuEX0015304	12	68	73.96	Liver	SOK,SOK,SOK,na,na@95.41,33.59	Liver_c	25525873	Irimia et al Fig S2	Mmu
DNM2	MmuEX0015304	12	53	18.12	Skeletal muscle	OK,OK,OK,na,na@11.42,51.58	Muscle_a	25525873	Irimia et al Fig S2	Mmu
DNM2	MmuEX0015304	12	53	15.92	Skeletal muscle	SOK,SOK,SOK,na,na@37.41,197.59	Muscle_b	25525873	Irimia et al Fig S2	Mmu
DNM2	MmuEX0015304	12	53	47.24	Skeletal muscle	LOW,LOW,LOW,na,na@12.75,14.25	Muscle_c	25525873	Irimia et al Fig S2	Mmu
DNM2	MmuEX0015304	12	88	94.31	Spleen	SOK,SOK,SOK,na,na@392.33,23.67	Spleen_a	25525873	Irimia et al Fig S2	Mmu
DNM2	MmuEX0015304	12	88	90.84	Spleen	SOK,SOK,SOK,na,na@1024.68,103.32	Spleen_b	25525873	Irimia et al Fig S2	Mmu
DNM2	MmuEX0015304	12	88	86.38	Spleen	SOK,SOK,SOK,na,na@133.89,21.11	Spleen_c	25525873	Irimia et al Fig S2	Mmu
DNM2	MmuEX0015304	12	93	98.59	Stomach	OK,OK,OK,na,na@46.34,0.66	Stomach_a	25525873	Irimia et al Fig S2	Mmu
DNM2	MmuEX0015304	12	93	90.9	Stomach	SOK,SOK,SOK,na,na@364.51,36.49	Stomach_b	25525873	Irimia et al Fig S2	Mmu
DNM2	MmuEX0015304	12	93	92.02	Stomach	SOK,SOK,SOK,na,na@576.05,49.95	Stomach_c	25525873	Irimia et al Fig S2	Mmu
DNM2	MmuEX0015304	12	84	83.42	Testis	SOK,SOK,SOK,na,na@1077.79,214.21	Testis_a	25525873	Irimia et al Fig S2	Mmu
DNM2	MmuEX0015304	12	84	79.65	Testis	SOK,SOK,SOK,na,na@452.41,115.59	Testis_b	25525873	Irimia et al Fig S2	Mmu
DNM2	MmuEX0015304	12	84	80.93	Testis	SOK,SOK,SOK,na,na@1453.50,342.50	Testis_c	25525873	Irimia et al Fig S2	Mmu
DNM2	MmuEX0015304	12	66	67.51	Hippocampus	SOK,SOK,SOK,na,na@83.04,39.96	Hippocampus	25525873	Irimia et al Fig S2	Mmu
ITSN1	MmuEX0024756	15	62	40.3	Cerebellum	SOK,SOK,SOK,na,na@110.02,162.98	Cerebellum_a	25525873	Irimia et al Fig S2	Mmu
ITSN1	MmuEX0024756	15	62	47.8	Cerebellum	SOK,SOK,SOK,na,na@62.14,67.86	Cerebellum_b	25525873	Irimia et al Fig S2	Mmu
ITSN1	MmuEX0024756	15	62	41.35	Cerebellum	SOK,SOK,SOK,na,na@186.90,265.10	Cerebellum_c	25525873	Irimia et al Fig S2	Mmu
ITSN1	MmuEX0024756	15	0	0	Heart	SOK,SOK,SOK,na,na@0.00,129.00	Heart_a	25525873	Irimia et al Fig S2	Mmu
ITSN1	MmuEX0024756	15	0	0	Heart	SOK,SOK,SOK,na,na@0.00,102.00	Heart_b	25525873	Irimia et al Fig S2	Mmu
ITSN1	MmuEX0024756	15	0	0	Heart	SOK,SOK,SOK,na,na@0.00,145.00	Heart_c	25525873	Irimia et al Fig S2	Mmu
ITSN1	MmuEX0024756	15	0	0	Kidney	SOK,SOK,SOK,na,na@0.00,103.00	Kidney_a	25525873	Irimia et al Fig S2	Mmu
ITSN1	MmuEX0024756	15	0	0	Kidney	OK,OK,OK,na,na@0.00,75.00	Kidney_b	25525873	Irimia et al Fig S2	Mmu
ITSN1	MmuEX0024756	15	0	0	Kidney	OK,OK,OK,na,na@0.00,91.00	Kidney_c	25525873	Irimia et al Fig S2	Mmu
ITSN1	MmuEX0024756	15	0	0	Liver	OK,OK,OK,na,na@0.00,75.00	Liver_a	25525873	Irimia et al Fig S2	Mmu
ITSN1	MmuEX0024756	15	0	0	Liver	SOK,SOK,SOK,na,na@0.00,103.00	Liver_b	25525873	Irimia et al Fig S2	Mmu
ITSN1	MmuEX0024756	15	0	0	Liver	OK,OK,OK,na,na@0.00,69.00	Liver_c	25525873	Irimia et al Fig S2	Mmu
ITSN1	MmuEX0024756	15	0	0	Skeletal muscle	OK,OK,OK,na,na@0.00,65.00	Muscle_a	25525873	Irimia et al Fig S2	Mmu
ITSN1	MmuEX0024756	15	0	0	Skeletal muscle	SOK,SOK,SOK,na,na@0.00,519.00	Muscle_b	25525873	Irimia et al Fig S2	Mmu
ITSN1	MmuEX0024756	15	0	0	Spleen	OK,OK,OK,na,na@0.00,90.00	Spleen_a	25525873	Irimia et al Fig S2	Mmu
ITSN1	MmuEX0024756	15	0	0	Spleen	SOK,SOK,SOK,na,na@0.00,294.00	Spleen_b	25525873	Irimia et al Fig S2	Mmu
ITSN1	MmuEX0024756	15	0	0	Spleen	LOW,LOW,LOW,na,na@0.00,18.00	Spleen_c	25525873	Irimia et al Fig S2	Mmu
ITSN1	MmuEX0024756	15	0	0	Stomach	OK,OK,OK,na,na@0.00,41.00	Stomach_b	25525873	Irimia et al Fig S2	Mmu
ITSN1	MmuEX0024756	15	0	0	Stomach	OK,OK,OK,na,na@0.00,54.00	Stomach_c	25525873	Irimia et al Fig S2	Mmu
ITSN1	MmuEX0024756	15	0	0	Testis	SOK,SOK,SOK,na,na@0.00,196.00	Testis_a	25525873	Irimia et al Fig S2	Mmu
ITSN1	MmuEX0024756	15	0	0	Testis	OK,OK,OK,na,na@0.00,82.00	Testis_b	25525873	Irimia et al Fig S2	Mmu
ITSN1	MmuEX0024756	15	0	0	Testis	SOK,SOK,SOK,na,na@0.00,252.00	Testis_c	25525873	Irimia et al Fig S2	Mmu
ITSN1	MmuEX0024756	15	78	73.22	Hippocampus	SOK,SOK,SOK,na,na@112.76,41.24	Hippocampus	25525873	Irimia et al Fig S2	Mmu
NBEA	MmuEX0030987	9	74	48.55	Cerebellum	SOK,SOK,SOK,na,na@80.11,84.89	Cerebellum_a	25525873	Irimia et al Fig S2	Mmu
NBEA	MmuEX0030987	9	74	62.08	Cerebellum	SOK,SOK,SOK,na,na@152.72,93.28	Cerebellum_b	25525873	Irimia et al Fig S2	Mmu
NBEA	MmuEX0030987	9	74	49.83	Cerebellum	SOK,SOK,SOK,na,na@125.57,126.43	Cerebellum_c	25525873	Irimia et al Fig S2	Mmu
NBEA	MmuEX0030987	9	58	60.08	Kidney	LOW,OK,LOW,na,na@21.63,14.37	Kidney_c	25525873	Irimia et al Fig S2	Mmu
NBEA	MmuEX0030987	9	59	37.96	Testis	OK,OK,OK,na,na@12.15,19.85	Testis_a	25525873	Irimia et al Fig S2	Mmu
NBEA	MmuEX0030987	9	59	37.22	Testis	OK,OK,OK,na,na@13.40,22.60	Testis_b	25525873	Irimia et al Fig S2	Mmu
NBEA	MmuEX0030987	9	59	57.12	Testis	SOK,SOK,SOK,na,na@106.81,80.19	Testis_c	25525873	Irimia et al Fig S2	Mmu
NBEA	MmuEX0030987	9	75	63.83	Hippocampus	SOK,SOK,SOK,na,na@308.30,174.70	Hippocampus	25525873	Irimia et al Fig S2	Mmu
PPFIA2	MmuEX0036510	9	29	13.41	Cerebellum	OK,SOK,OK,na,na@13.01,83.99	Cerebellum_a	25525873	Irimia et al Fig S2	Mmu
PPFIA2	MmuEX0036510	9	29	24.18	Cerebellum	OK,OK,OK,na,na@11.36,35.64	Cerebellum_b	25525873	Irimia et al Fig S2	Mmu
PPFIA2	MmuEX0036510	9	29	10.96	Cerebellum	SOK,SOK,SOK,na,na@20.93,170.07	Cerebellum_c	25525873	Irimia et al Fig S2	Mmu
PPFIA2	MmuEX0036510	9	0	0	Testis	OK,OK,OK,na,na@0.00,22.00	Testis_a	25525873	Irimia et al Fig S2	Mmu
PPFIA2	MmuEX0036510	9	0	0	Testis	LOW,LOW,LOW,na,na@0.00,15.00	Testis_c	25525873	Irimia et al Fig S2	Mmu
PPFIA2	MmuEX0036510	9	74	76.07	Hippocampus	SOK,SOK,SOK,na,na@120.19,37.81	Hippocampus	25525873	Irimia et al Fig S2	Mmu
PTPRD	MmuEX0037892	12	41	37.49	Cerebellum	SOK,SOK,SOK,na,na@181.08,301.92	Cerebellum_a	25525873	Irimia et al Fig S2	Mmu
PTPRD	MmuEX0037892	12	41	51.32	Cerebellum	SOK,SOK,SOK,na,na@136.00,129.00	Cerebellum_b	25525873	Irimia et al Fig S2	Mmu
PTPRD	MmuEX0037892	12	41	39.44	Cerebellum	SOK,SOK,SOK,na,na@331.69,509.31	Cerebellum_c	25525873	Irimia et al Fig S2	Mmu
PTPRD	MmuEX0037892	12	0	15.45	Heart	OK,OK,OK,na,na@4.33,23.67	Heart_b	25525873	Irimia et al Fig S2	Mmu
PTPRD	MmuEX0037892	12	0	12.85	Heart	OK,OK,OK,na,na@4.37,29.63	Heart_c	25525873	Irimia et al Fig S2	Mmu
PTPRD	MmuEX0037892	12	0	0.98	Kidney	SOK,SOK,SOK,na,na@3.04,306.96	Kidney_a	25525873	Irimia et al Fig S2	Mmu
PTPRD	MmuEX0037892	12	0	1.21	Kidney	SOK,SOK,SOK,na,na@3.02,246.97	Kidney_b	25525873	Irimia et al Fig S2	Mmu
PTPRD	MmuEX0037892	12	0	0.64	Kidney	SOK,SOK,SOK,na,na@1.52,235.48	Kidney_c	25525873	Irimia et al Fig S2	Mmu
PTPRD	MmuEX0037892	12	0	1.27	Liver	SOK,SOK,SOK,na,na@3.02,234.98	Liver_a	25525873	Irimia et al Fig S2	Mmu
PTPRD	MmuEX0037892	12	0	0	Liver	SOK,SOK,SOK,na,na@0.00,271.00	Liver_b	25525873	Irimia et al Fig S2	Mmu
PTPRD	MmuEX0037892	12	0	1.11	Liver	SOK,SOK,SOK,na,na@1.52,135.48	Liver_c	25525873	Irimia et al Fig S2	Mmu
PTPRD	MmuEX0037892	12	0	0	Spleen	OK,OK,OK,na,na@0.00,25.00	Spleen_b	25525873	Irimia et al Fig S2	Mmu
PTPRD	MmuEX0037892	12	0	0	Spleen	OK,OK,OK,na,na@0.00,51.00	Spleen_c	25525873	Irimia et al Fig S2	Mmu
PTPRD	MmuEX0037892	12	0	0	Stomach	OK,OK,OK,na,na@0.00,39.00	Stomach_b	25525873	Irimia et al Fig S2	Mmu
PTPRD	MmuEX0037892	12	0	0	Stomach	OK,OK,OK,na,na@0.00,23.00	Stomach_c	25525873	Irimia et al Fig S2	Mmu
PTPRD	MmuEX0037892	12	0	0	Testis	OK,OK,OK,na,na@0.00,49.00	Testis_a	25525873	Irimia et al Fig S2	Mmu
PTPRD	MmuEX0037892	12	0	0	Testis	OK,OK,OK,na,na@0.00,28.00	Testis_b	25525873	Irimia et al Fig S2	Mmu
PTPRD	MmuEX0037892	12	0	0	Testis	SOK,SOK,SOK,na,na@0.00,106.00	Testis_c	25525873	Irimia et al Fig S2	Mmu
PTPRD	MmuEX0037892	12	38	33.37	Hippocampus	SOK,SOK,SOK,na,na@127.14,253.86	Hippocampus	25525873	Irimia et al Fig S2	Mmu
RAPGEF6	MmuEX0038816	15	78	80.7	Cerebellum	OK,OK,OK,na,na@49.23,11.77	Cerebellum_b	25525873	Irimia et al Fig S2	Mmu
RAPGEF6	MmuEX0038816	15	78	68.63	Cerebellum	LOW,OK,LOW,na,na@18.53,8.47	Cerebellum_c	25525873	Irimia et al Fig S2	Mmu
RAPGEF6	MmuEX0038816	15	0	0	Heart	LOW,LOW,LOW,na,na@0.00,16.00	Heart_a	25525873	Irimia et al Fig S2	Mmu
RAPGEF6	MmuEX0038816	15	0	0	Heart	OK,OK,OK,na,na@0.00,24.00	Heart_c	25525873	Irimia et al Fig S2	Mmu
RAPGEF6	MmuEX0038816	15	0	0	Kidney	OK,OK,OK,na,na@0.00,41.00	Kidney_a	25525873	Irimia et al Fig S2	Mmu
RAPGEF6	MmuEX0038816	15	0	0	Kidney	OK,OK,OK,na,na@0.00,78.00	Kidney_c	25525873	Irimia et al Fig S2	Mmu
RAPGEF6	MmuEX0038816	15	0	0	Liver	OK,OK,OK,na,na@0.00,28.00	Liver_a	25525873	Irimia et al Fig S2	Mmu
RAPGEF6	MmuEX0038816	15	0	0	Liver	LOW,LOW,LOW,na,na@0.00,16.00	Liver_b	25525873	Irimia et al Fig S2	Mmu
RAPGEF6	MmuEX0038816	15	0	0	Liver	OK,OK,OK,na,na@0.00,34.00	Liver_c	25525873	Irimia et al Fig S2	Mmu
RAPGEF6	MmuEX0038816	15	0	0	Spleen	SOK,SOK,SOK,na,na@0.00,174.00	Spleen_a	25525873	Irimia et al Fig S2	Mmu
RAPGEF6	MmuEX0038816	15	0	0	Spleen	SOK,SOK,SOK,na,na@0.00,124.00	Spleen_b	25525873	Irimia et al Fig S2	Mmu
RAPGEF6	MmuEX0038816	15	0	3.38	Stomach	OK,OK,OK,na,na@1.72,49.28	Stomach_b	25525873	Irimia et al Fig S2	Mmu
RAPGEF6	MmuEX0038816	15	0	0	Testis	OK,OK,OK,na,na@0.00,62.00	Testis_a	25525873	Irimia et al Fig S2	Mmu
RAPGEF6	MmuEX0038816	15	0	0	Testis	OK,OK,OK,na,na@0.00,89.00	Testis_b	25525873	Irimia et al Fig S2	Mmu
RAPGEF6	MmuEX0038816	15	0	0	Testis	SOK,SOK,SOK,na,na@0.00,656.00	Testis_c	25525873	Irimia et al Fig S2	Mmu
RAPGEF6	MmuEX0038816	15	66	75.98	Hippocampus	OK,SOK,OK,na,na@55.47,17.53	Hippocampus	25525873	Irimia et al Fig S2	Mmu
RIMS2	MmuEX0039865	12	85	70.3	Cerebellum	OK,OK,OK,na,na@48.51,20.49	Cerebellum_a	25525873	Irimia et al Fig S2	Mmu
RIMS2	MmuEX0039865	12	85	87.12	Cerebellum	OK,SOK,OK,na,na@85.38,12.62	Cerebellum_b	25525873	Irimia et al Fig S2	Mmu
RIMS2	MmuEX0039865	12	85	73.08	Cerebellum	SOK,SOK,SOK,na,na@75.27,27.73	Cerebellum_c	25525873	Irimia et al Fig S2	Mmu
RIMS2	MmuEX0039865	12	0	0	Testis	OK,OK,OK,na,na@0.00,99.00	Testis_a	25525873	Irimia et al Fig S2	Mmu
RIMS2	MmuEX0039865	12	0	0	Testis	OK,OK,OK,na,na@0.00,40.00	Testis_b	25525873	Irimia et al Fig S2	Mmu
RIMS2	MmuEX0039865	12	0	0	Testis	SOK,SOK,SOK,na,na@0.00,196.00	Testis_c	25525873	Irimia et al Fig S2	Mmu
RIMS2	MmuEX0039865	12	80	66.26	Hippocampus	OK,OK,OK,na,na@47.04,23.96	Hippocampus	25525873	Irimia et al Fig S2	Mmu
VAV2	MmuEX0051281	15	78	72.21	Cerebellum	OK,SOK,OK,na,na@59.21,22.79	Cerebellum_a	25525873	Irimia et al Fig S2	Mmu
VAV2	MmuEX0051281	15	78	77.78	Cerebellum	SOK,SOK,SOK,na,na@84.00,24.00	Cerebellum_c	25525873	Irimia et al Fig S2	Mmu
VAV2	MmuEX0051281	15	0	0	Heart	OK,OK,OK,na,na@0.00,48.00	Heart_a	25525873	Irimia et al Fig S2	Mmu
VAV2	MmuEX0051281	15	0	0	Heart	OK,OK,OK,na,na@0.00,50.00	Heart_b	25525873	Irimia et al Fig S2	Mmu
VAV2	MmuEX0051281	15	0	0	Heart	OK,OK,OK,na,na@0.00,67.00	Heart_c	25525873	Irimia et al Fig S2	Mmu
VAV2	MmuEX0051281	15	0	0	Kidney	SOK,SOK,SOK,na,na@0.00,204.00	Kidney_a	25525873	Irimia et al Fig S2	Mmu
VAV2	MmuEX0051281	15	0	0	Kidney	SOK,SOK,SOK,na,na@0.00,172.00	Kidney_b	25525873	Irimia et al Fig S2	Mmu
VAV2	MmuEX0051281	15	0	0	Kidney	SOK,SOK,SOK,na,na@0.00,107.00	Kidney_c	25525873	Irimia et al Fig S2	Mmu
VAV2	MmuEX0051281	15	0	0	Liver	SOK,SOK,SOK,na,na@0.00,236.00	Liver_a	25525873	Irimia et al Fig S2	Mmu
VAV2	MmuEX0051281	15	0	0	Liver	SOK,SOK,SOK,na,na@0.00,205.00	Liver_b	25525873	Irimia et al Fig S2	Mmu
VAV2	MmuEX0051281	15	0	0	Liver	SOK,SOK,SOK,na,na@0.00,125.00	Liver_c	25525873	Irimia et al Fig S2	Mmu
VAV2	MmuEX0051281	15	0	0	Spleen	SOK,SOK,SOK,na,na@0.00,309.00	Spleen_a	25525873	Irimia et al Fig S2	Mmu
VAV2	MmuEX0051281	15	0	0	Spleen	SOK,SOK,SOK,na,na@0.00,564.00	Spleen_b	25525873	Irimia et al Fig S2	Mmu
VAV2	MmuEX0051281	15	0	0	Spleen	OK,OK,OK,na,na@0.00,42.00	Spleen_c	25525873	Irimia et al Fig S2	Mmu
VAV2	MmuEX0051281	15	0	0	Stomach	OK,OK,OK,na,na@0.00,42.00	Stomach_b	25525873	Irimia et al Fig S2	Mmu
VAV2	MmuEX0051281	15	0	0	Stomach	OK,OK,OK,na,na@0.00,28.00	Stomach_c	25525873	Irimia et al Fig S2	Mmu
VAV2	MmuEX0051281	15	0	0	Testis	SOK,SOK,SOK,na,na@0.00,142.00	Testis_a	25525873	Irimia et al Fig S2	Mmu
VAV2	MmuEX0051281	15	0	0	Testis	SOK,SOK,SOK,na,na@0.00,362.00	Testis_b	25525873	Irimia et al Fig S2	Mmu
VAV2	MmuEX0051281	15	0	1.17	Testis	SOK,SOK,SOK,na,na@1.74,147.26	Testis_c	25525873	Irimia et al Fig S2	Mmu
ZMYND8	MmuEX0053985	12	62	66.91	Cerebellum	SOK,SOK,OK,OK,S@68.92,34.08	Cerebellum_a	25525873	Irimia et al Fig S2	Mmu
ZMYND8	MmuEX0053985	12	62	62.57	Cerebellum	OK,SOK,OK,B1,S@42.55,25.45	Cerebellum_b	25525873	Irimia et al Fig S2	Mmu
ZMYND8	MmuEX0053985	12	62	65.8	Cerebellum	SOK,SOK,SOK,B1,S@76.33,39.67	Cerebellum_c	25525873	Irimia et al Fig S2	Mmu
ZMYND8	MmuEX0053985	12	6	10.61	Heart	OK,SOK,OK,B2,C1@4.77,40.23	Heart_a	25525873	Irimia et al Fig S2	Mmu
ZMYND8	MmuEX0053985	12	6	0	Heart	OK,OK,OK,Bn,C1@0.00,31.00	Heart_c	25525873	Irimia et al Fig S2	Mmu
ZMYND8	MmuEX0053985	12	9	25.02	Kidney	OK,SOK,OK,B2,C1@13.76,41.24	Kidney_a	25525873	Irimia et al Fig S2	Mmu
ZMYND8	MmuEX0053985	12	9	11.44	Kidney	OK,SOK,OK,B2,C1@9.15,70.85	Kidney_b	25525873	Irimia et al Fig S2	Mmu
ZMYND8	MmuEX0053985	12	9	15.15	Kidney	OK,SOK,OK,B2,C1@7.42,41.58	Kidney_c	25525873	Irimia et al Fig S2	Mmu
ZMYND8	MmuEX0053985	12	9	0	Liver	OK,OK,LOW,Bn,C1@0.00,22.00	Liver_a	25525873	Irimia et al Fig S2	Mmu
ZMYND8	MmuEX0053985	12	9	0	Liver	LOW,OK,LOW,Bn,S@0.00,19.00	Liver_b	25525873	Irimia et al Fig S2	Mmu
ZMYND8	MmuEX0053985	12	9	16.62	Liver	OK,SOK,OK,OK,S@6.32,31.68	Liver_c	25525873	Irimia et al Fig S2	Mmu
ZMYND8	MmuEX0053985	12	0	0	Skeletal muscle	LOW,OK,VLOW,Bn,C1@0.00,17.00	Muscle_b	25525873	Irimia et al Fig S2	Mmu
ZMYND8	MmuEX0053985	12	12	28.21	Spleen	OK,SOK,OK,OK,S@15.23,38.77	Spleen_a	25525873	Irimia et al Fig S2	Mmu
ZMYND8	MmuEX0053985	12	12	25.61	Spleen	SOK,SOK,SOK,B1,S@34.06,98.94	Spleen_b	25525873	Irimia et al Fig S2	Mmu
ZMYND8	MmuEX0053985	12	12	7.19	Spleen	OK,OK,OK,Bn,C1@1.87,24.13	Spleen_c	25525873	Irimia et al Fig S2	Mmu
ZMYND8	MmuEX0053985	12	14	23.04	Stomach	OK,OK,VLOW,OK,C1@5.30,17.70	Stomach_b	25525873	Irimia et al Fig S2	Mmu
ZMYND8	MmuEX0053985	12	14	11.55	Stomach	OK,OK,N,Bn,C2@2.77,21.23	Stomach_c	25525873	Irimia et al Fig S2	Mmu
ZMYND8	MmuEX0053985	12	16	25.27	Testis	OK,SOK,OK,B2,S@9.86,29.14	Testis_c	25525873	Irimia et al Fig S2	Mmu
ZMYND8	MmuEX0053985	12	58	60.96	Hippocampus	OK,SOK,OK,OK,S@34.14,21.86	Hippocampus	25525873	Irimia et al Fig S2	Mmu
Clasp2	MmuEX0011514	24	67	31.02	N2A	SOK,SOK,SOK,OK,S@98.95,220.05	CL_N2A_b	25219497	Raj et al Fig 4	Mmu
Clasp2	MmuEX0011514	24	67	52.53	N2A	SOK,SOK,SOK,B1,S@116.62,105.38	CL_N2A_c	25219497	Raj et al Fig 4	Mmu
Daam1	MmuEX0013683	27	70	53.74	N2A	SOK,SOK,SOK,OK,S@152.62,131.38	CL_N2A_b	25219497	Raj et al Fig 4	Mmu
Daam1	MmuEX0013683	27	70	72.68	N2A	SOK,SOK,SOK,B1,S@146.81,55.19	CL_N2A_c	25219497	Raj et al Fig 4	Mmu
Lass6	MmuEX0026173	24	73	78.01	Ctl KD (N2A)	SOK,SOK,SOK,OK,S@147.44,41.56	CL_N2A_b	25219497	Raj et al Fig 5	Mmu
Lass6	MmuEX0026173	24	73	50.36	Ctl KD (N2A)	SOK,SOK,SOK,OK,S@86.62,85.38	CL_N2A_c	25219497	Raj et al Fig 5	Mmu
Mef2d	MmuEX0028570	21	71	72.74	Ctl KD (N2A)	SOK,SOK,SOK,OK,S@321.51,120.49	CL_N2A_b	25219497	Raj et al Fig 5	Mmu
Mef2d	MmuEX0028570	21	71	90.76	Ctl KD (N2A)	SOK,SOK,SOK,OK,S@691.59,70.41	CL_N2A_c	25219497	Raj et al Fig 5	Mmu
Neo1	MmuEX0031505	33	61	42.38	Ctl KD (N2A)	SOK,SOK,SOK,OK,S@420.41,571.59	CL_N2A_b	25219497	Raj et al Fig 5	Mmu
Neo1	MmuEX0031505	33	61	21.88	Ctl KD (N2A)	SOK,SOK,SOK,OK,S@127.34,454.66	CL_N2A_c	25219497	Raj et al Fig 5	Mmu
ARVCF	MmuEX0006307	18	41	39.85	N2A nSR100 shRNA -	SOK,SOK,SOK,OK,S@273.77,413.23	CL_N2A_b	25219497	Raj et al Fig S1	Mmu
ARVCF	MmuEX0006307	18	41	51.47	N2A nSR100 shRNA -	SOK,SOK,SOK,OK,S@285.66,269.34	CL_N2A_c	25219497	Raj et al Fig S1	Mmu
ASPH	MmuEX0006458	45	62	37.96	N2A nSR100 shRNA -	SOK,SOK,SOK,OK,S@279.39,456.61	CL_N2A_b	25219497	Raj et al Fig S1	Mmu
ASPH	MmuEX0006458	45	62	65.67	N2A nSR100 shRNA -	SOK,SOK,SOK,OK,S@218.68,114.32	CL_N2A_c	25219497	Raj et al Fig S1	Mmu
CLASP2	MmuEX0011532	24	82	43.05	N2A nSR100 shRNA -	SOK,SOK,SOK,OK,S@191.14,252.86	CL_N2A_b	25219497	Raj et al Fig S1	Mmu
CLASP2	MmuEX0011532	24	82	78.59	N2A nSR100 shRNA -	SOK,SOK,SOK,OK,S@190.19,51.81	CL_N2A_c	25219497	Raj et al Fig S1	Mmu
DAAM1	MmuEX0013683	27	88	53.74	N2A nSR100 shRNA -	SOK,SOK,SOK,OK,S@152.62,131.38	CL_N2A_b	25219497	Raj et al Fig S1	Mmu
DAAM1	MmuEX0013683	27	88	72.68	N2A nSR100 shRNA -	SOK,SOK,SOK,B1,S@146.81,55.19	CL_N2A_c	25219497	Raj et al Fig S1	Mmu
DOCK4	MmuEX0015418	27	68	61.53	N2A nSR100 shRNA -	SOK,SOK,SOK,OK,S@819.58,512.42	CL_N2A_b	25219497	Raj et al Fig S1	Mmu
DOCK4	MmuEX0015418	27	68	82.23	N2A nSR100 shRNA -	SOK,SOK,SOK,OK,S@837.92,181.08	CL_N2A_c	25219497	Raj et al Fig S1	Mmu
LASS6	MmuEX0026173	24	89	78.01	N2A nSR100 shRNA -	SOK,SOK,SOK,OK,S@147.44,41.56	CL_N2A_b	25219497	Raj et al Fig S1	Mmu
LASS6	MmuEX0026173	24	89	50.36	N2A nSR100 shRNA -	SOK,SOK,SOK,OK,S@86.62,85.38	CL_N2A_c	25219497	Raj et al Fig S1	Mmu
MAST2	MmuEX0028003	21	37	27.9	N2A nSR100 shRNA -	SOK,SOK,SOK,OK,S@143.96,372.04	CL_N2A_b	25219497	Raj et al Fig S1	Mmu
MAST2	MmuEX0028003	21	37	56.64	N2A nSR100 shRNA -	SOK,SOK,SOK,OK,S@205.04,156.96	CL_N2A_c	25219497	Raj et al Fig S1	Mmu
NEO1	MmuEX0031505	33	67	42.38	N2A nSR100 shRNA -	SOK,SOK,SOK,OK,S@420.41,571.59	CL_N2A_b	25219497	Raj et al Fig S1	Mmu
NEO1	MmuEX0031505	33	67	21.88	N2A nSR100 shRNA -	SOK,SOK,SOK,OK,S@127.34,454.66	CL_N2A_c	25219497	Raj et al Fig S1	Mmu
Lass6	MmuEX0026173	24	76	78.01	N2A	SOK,SOK,SOK,OK,S@147.44,41.56	CL_N2A_b	25219497	Raj et al Fig S4	Mmu
Lass6	MmuEX0026173	24	76	50.36	N2A	SOK,SOK,SOK,OK,S@86.62,85.38	CL_N2A_c	25219497	Raj et al Fig S4	Mmu
Neo1	MmuEX0031505	33	59	42.38	N2A	SOK,SOK,SOK,OK,S@420.41,571.59	CL_N2A_b	25219497	Raj et al Fig S4	Mmu
Neo1	MmuEX0031505	33	59	21.88	N2A	SOK,SOK,SOK,OK,S@127.34,454.66	CL_N2A_c	25219497	Raj et al Fig S4	Mmu
Clasp2	MmuEX0011514	24	42	31.02	Ctl KD (N2A)	SOK,SOK,SOK,OK,S@98.95,220.05	CL_N2A_b	25219497	Raj et al Fig S5	Mmu
Clasp2	MmuEX0011514	24	42	52.53	Ctl KD (N2A)	SOK,SOK,SOK,B1,S@116.62,105.38	CL_N2A_c	25219497	Raj et al Fig S5	Mmu
Daam1	MmuEX0013683	27	55	53.74	Ctl KD (N2A)	SOK,SOK,SOK,OK,S@152.62,131.38	CL_N2A_b	25219497	Raj et al Fig S5	Mmu
Daam1	MmuEX0013683	27	55	72.68	Ctl KD (N2A)	SOK,SOK,SOK,B1,S@146.81,55.19	CL_N2A_c	25219497	Raj et al Fig S5	Mmu
Elmo2	MmuEX0016707	36	61	62.69	Ctl KD (N2A)	SOK,SOK,SOK,OK,S@187.44,111.56	CL_N2A_b	25219497	Raj et al Fig S5	Mmu
Elmo2	MmuEX0016707	36	61	71.56	Ctl KD (N2A)	SOK,SOK,SOK,B1,S@262.63,104.37	CL_N2A_c	25219497	Raj et al Fig S5	Mmu
Zfyve21	MmuEX0053793	54	46	63.1	Ctl KD (N2A)	SOK,SOK,SOK,OK,S@102.85,60.15	CL_N2A_b	25219497	Raj et al Fig S5	Mmu
Zfyve21	MmuEX0053793	54	46	64.13	Ctl KD (N2A)	SOK,SOK,SOK,OK,S@72.47,40.53	CL_N2A_c	25219497	Raj et al Fig S5	Mmu
1110002L01Rik	MmuEX0000073	85	2.52	3.33	Cerebellum	OK,OK,OK,Bn,S@1.03,29.97	Cerebellum_a		This study	Mmu
1110002L01Rik	MmuEX0000073	85	2.52	1.96	Cerebellum	OK,OK,OK,Bn,S@0.51,25.49	Cerebellum_b		This study	Mmu
1110002L01Rik	MmuEX0000073	85	2.52	3.51	Cerebellum	OK,OK,OK,B1,S@2.07,56.93	Cerebellum_c		This study	Mmu
1110002L01Rik	MmuEX0000073	85	7.76	3.31	ESC_E14	SOK,SOK,SOK,B1,S@6.72,196.28	ESC_E14		This study	Mmu
1110002L01Rik	MmuEX0000073	85	0	0	Heart	LOW,LOW,LOW,Bn,S@0.00,18.00	Heart_b		This study	Mmu
1110002L01Rik	MmuEX0000073	85	0	0	Heart	OK,OK,OK,Bn,S@0.00,32.00	Heart_c		This study	Mmu
1110002L01Rik	MmuEX0000073	85	0	0	Kidney	OK,OK,OK,Bn,S@0.00,46.00	Kidney_a		This study	Mmu
1110002L01Rik	MmuEX0000073	85	0	1.08	Kidney	OK,OK,OK,Bn,S@0.51,46.49	Kidney_b		This study	Mmu
1110002L01Rik	MmuEX0000073	85	0	2.1	Kidney	OK,OK,OK,Bn,S@1.53,71.47	Kidney_c		This study	Mmu
1110002L01Rik	MmuEX0000073	85	0	0	Liver	LOW,LOW,LOW,Bn,S@0.00,17.00	Liver_b		This study	Mmu
1110002L01Rik	MmuEX0000073	85	0	5.45	Liver	OK,OK,OK,Bn,S@1.58,27.42	Liver_c		This study	Mmu
1110002L01Rik	MmuEX0000073	85	0	3.03	Lung	LOW,LOW,LOW,Bn,S@0.52,16.48	Lung_a		This study	Mmu
1110002L01Rik	MmuEX0000073	85	0	1.16	Lung	OK,OK,OK,Bn,S@1.01,85.99	Lung_c		This study	Mmu
1110002L01Rik	MmuEX0000073	85	0	1.75	Lung	OK,OK,OK,Bn,S@0.51,28.49	Lung_d		This study	Mmu
1110002L01Rik	MmuEX0000073	85	0	2.33	Sk muscle	OK,OK,OK,Bn,S@1.03,42.97	Muscle_b		This study	Mmu
1110002L01Rik	MmuEX0000073	85	0	0	Ovary	OK,OK,OK,Bn,S@0.00,50.00	Ovary_b		This study	Mmu
1110002L01Rik	MmuEX0000073	85	0	8.57	Spleen	OK,OK,OK,OK,S@3.26,34.74	Spleen_a		This study	Mmu
1110002L01Rik	MmuEX0000073	85	0	8.26	Spleen	OK,OK,OK,OK,S@4.87,54.13	Spleen_b		This study	Mmu
1110002L01Rik	MmuEX0000073	85	0	0	Spleen	LOW,LOW,LOW,Bn,S@0.00,17.00	Spleen_c		This study	Mmu
1110002L01Rik	MmuEX0000073	85	50.38	38.46	Testis	OK,OK,OK,B1,S@17.31,27.69	Testis_a		This study	Mmu
1110002L01Rik	MmuEX0000073	85	50.38	28.81	Testis	OK,OK,OK,OK,S@21.90,54.10	Testis_b		This study	Mmu
1110002L01Rik	MmuEX0000073	85	50.38	31.96	Testis	SOK,SOK,SOK,B1,S@71.91,153.09	Testis_c		This study	Mmu
1110002L01Rik	MmuEX0000073	85	3.89	0	Brain	OK,OK,OK,Bn,S@0.00,45.00	Whole_Brain_a		This study	Mmu
1110002L01Rik	MmuEX0000073	85	3.89	0	Brain	OK,OK,OK,Bn,S@0.00,43.00	Whole_Brain_b		This study	Mmu
1700106N22Rik	MmuEX0000613	55	95.8	96.77	Cerebellum	OK,OK,OK,OK,S@59.03,1.97	Cerebellum_a		This study	Mmu
1700106N22Rik	MmuEX0000613	55	95.8	97.44	Cerebellum	OK,OK,OK,OK,S@75.03,1.97	Cerebellum_c		This study	Mmu
1700106N22Rik	MmuEX0000613	55	91.06	92.16	ESC_E14	OK,OK,OK,OK,S@45.16,3.84	ESC_E14		This study	Mmu
1700106N22Rik	MmuEX0000613	55	100	97.56	Kidney	OK,OK,OK,OK,S@79.02,1.98	Kidney_a		This study	Mmu
1700106N22Rik	MmuEX0000613	55	100	97.35	Kidney	SOK,SOK,SOK,OK,S@145.05,3.95	Kidney_b		This study	Mmu
1700106N22Rik	MmuEX0000613	55	100	98.04	Kidney	SOK,SOK,SOK,B1,S@99.02,1.98	Kidney_c		This study	Mmu
1700106N22Rik	MmuEX0000613	55	100	83.78	Lung	LOW,LOW,LOW,B1,C1@56.97,11.03	Lung_c		This study	Mmu
1700106N22Rik	MmuEX0000613	55	100	82.86	Lung	LOW,LOW,LOW,OK,C1@26.52,5.48	Lung_d		This study	Mmu
1700106N22Rik	MmuEX0000613	55	100	100	Ovary	OK,OK,OK,OK,S@44.00,0.00	Ovary_b		This study	Mmu
1700106N22Rik	MmuEX0000613	55	93.62	100	Spleen	LOW,LOW,LOW,OK,S@33.00,0.00	Spleen_a		This study	Mmu
1700106N22Rik	MmuEX0000613	55	93.62	96.12	Spleen	SOK,SOK,SOK,OK,S@97.08,3.92	Spleen_b		This study	Mmu
1700106N22Rik	MmuEX0000613	55	93.62	100	Spleen	OK,OK,OK,OK,S@45.00,0.00	Spleen_c		This study	Mmu
1700106N22Rik	MmuEX0000613	55	100	91.43	Stomach	OK,OK,OK,OK,S@61.26,5.74	Stomach_b		This study	Mmu
1700106N22Rik	MmuEX0000613	55	100	93.55	Stomach	OK,OK,OK,OK,S@56.13,3.87	Stomach_c		This study	Mmu
1700106N22Rik	MmuEX0000613	55	62.4	22.03	Testis	OK,OK,LOW,B2,C1@7.93,28.07	Testis_a		This study	Mmu
1700106N22Rik	MmuEX0000613	55	62.4	40	Testis	LOW,LOW,VLOW,OK,C1@14.00,21.00	Testis_b		This study	Mmu
1700106N22Rik	MmuEX0000613	55	62.4	37.41	Testis	SOK,SOK,OK,B1,C2@37.78,63.22	Testis_c		This study	Mmu
1700106N22Rik	MmuEX0000613	55	87.17	100	Brain	SOK,SOK,SOK,OK,S@129.00,0.00	Whole_Brain_a		This study	Mmu
1700106N22Rik	MmuEX0000613	55	87.17	95.92	Brain	OK,OK,OK,B1,S@92.08,3.92	Whole_Brain_b		This study	Mmu
Acss2	MmuEX0003610	39	26.1	8.15	Cerebellum	SOK,SOK,SOK,OK,S@33.25,374.75	Cerebellum_a		This study	Mmu
Acss2	MmuEX0003610	39	26.1	9.54	Cerebellum	SOK,SOK,SOK,OK,S@15.93,151.07	Cerebellum_b		This study	Mmu
Acss2	MmuEX0003610	39	26.1	6.73	Cerebellum	SOK,SOK,SOK,OK,S@36.34,503.66	Cerebellum_c		This study	Mmu
Acss2	MmuEX0003610	39	0	1.4	ESC_E14	OK,OK,OK,OK,S@1.11,77.89	ESC_E14		This study	Mmu
Acss2	MmuEX0003610	39	77.07	87.31	Heart	SOK,SOK,SOK,OK,S@225.26,32.74	Heart_a		This study	Mmu
Acss2	MmuEX0003610	39	77.07	79	Heart	SOK,SOK,SOK,OK,S@155.63,41.37	Heart_b		This study	Mmu
Acss2	MmuEX0003610	39	77.07	80.04	Heart	SOK,SOK,SOK,OK,S@200.10,49.90	Heart_c		This study	Mmu
Acss2	MmuEX0003610	39	5.53	2.39	Kidney	SOK,SOK,SOK,OK,S@35.68,1457.32	Kidney_a		This study	Mmu
Acss2	MmuEX0003610	39	5.53	2.08	Kidney	SOK,SOK,SOK,OK,S@35.67,1679.33	Kidney_b		This study	Mmu
Acss2	MmuEX0003610	39	5.53	2.89	Kidney	SOK,SOK,SOK,OK,S@36.44,1224.56	Kidney_c		This study	Mmu
Acss2	MmuEX0003610	39	7.18	2.35	Liver	SOK,SOK,SOK,OK,S@51.32,2132.68	Liver_a		This study	Mmu
Acss2	MmuEX0003610	39	7.18	3.46	Liver	SOK,SOK,SOK,OK,S@51.73,1443.27	Liver_b		This study	Mmu
Acss2	MmuEX0003610	39	7.18	2.81	Liver	SOK,SOK,SOK,OK,S@20.15,696.85	Liver_c		This study	Mmu
Acss2	MmuEX0003610	39	19.22	11.36	Lung	SOK,SOK,SOK,OK,S@26.92,210.08	Lung_a		This study	Mmu
Acss2	MmuEX0003610	39	19.22	5.99	Lung	SOK,SOK,SOK,OK,S@25.82,405.18	Lung_c		This study	Mmu
Acss2	MmuEX0003610	39	19.22	7.15	Lung	SOK,SOK,SOK,OK,S@12.16,157.84	Lung_d		This study	Mmu
Acss2	MmuEX0003610	39	50.75	72.65	Sk muscle	OK,OK,OK,OK,S@59.57,22.43	Muscle_a		This study	Mmu
Acss2	MmuEX0003610	39	50.75	80.44	Sk muscle	SOK,SOK,SOK,OK,S@157.66,38.34	Muscle_b		This study	Mmu
Acss2	MmuEX0003610	39	50.75	86.11	Sk muscle	LOW,OK,LOW,OK,S@31.86,5.14	Muscle_c		This study	Mmu
Acss2	MmuEX0003610	39	6.2	3.92	Ovary	OK,OK,OK,OK,S@2.82,69.18	Ovary_a		This study	Mmu
Acss2	MmuEX0003610	39	6.2	4.37	Ovary	SOK,SOK,SOK,OK,S@15.30,334.71	Ovary_b		This study	Mmu
Acss2	MmuEX0003610	39	14.85	15.76	Spleen	SOK,SOK,SOK,B1,S@16.08,85.92	Spleen_a		This study	Mmu
Acss2	MmuEX0003610	39	14.85	7.37	Spleen	SOK,SOK,SOK,B1,S@9.29,116.71	Spleen_b		This study	Mmu
Acss2	MmuEX0003610	39	14.85	1.76	Spleen	SOK,SOK,SOK,OK,S@15.56,868.44	Spleen_c		This study	Mmu
Acss2	MmuEX0003610	39	4.76	0	Stomach	OK,OK,OK,Bn,S@0.00,34.00	Stomach_a		This study	Mmu
Acss2	MmuEX0003610	39	4.76	0.93	Stomach	SOK,SOK,SOK,B1,S@1.65,175.35	Stomach_b		This study	Mmu
Acss2	MmuEX0003610	39	4.76	2.09	Stomach	SOK,SOK,SOK,OK,S@2.78,130.22	Stomach_c		This study	Mmu
Acss2	MmuEX0003610	39	5.96	1.66	Testis	SOK,SOK,SOK,OK,S@6.11,361.89	Testis_a		This study	Mmu
Acss2	MmuEX0003610	39	5.96	1.67	Testis	SOK,SOK,SOK,B1,S@6.66,392.34	Testis_b		This study	Mmu
Acss2	MmuEX0003610	39	5.96	3.69	Testis	SOK,SOK,SOK,OK,S@33.84,883.16	Testis_c		This study	Mmu
Acss2	MmuEX0003610	39	34.29	9.25	Brain	SOK,SOK,SOK,OK,S@27.66,271.34	Whole_Brain_a		This study	Mmu
Acss2	MmuEX0003610	39	34.29	15.37	Brain	SOK,SOK,SOK,OK,S@51.80,285.20	Whole_Brain_b		This study	Mmu
Aifm3	MmuEX0004425	21	85.67	86.15	Cerebellum	SOK,SOK,SOK,B1,S@901.13,144.87	Cerebellum_a		This study	Mmu
Aifm3	MmuEX0004425	21	85.67	79.29	Cerebellum	SOK,SOK,SOK,OK,S@103.08,26.92	Cerebellum_b		This study	Mmu
Aifm3	MmuEX0004425	21	85.67	84.63	Cerebellum	SOK,SOK,SOK,OK,S@1495.41,271.59	Cerebellum_c		This study	Mmu
Aifm3	MmuEX0004425	21	7.76	0	ESC_E14	OK,OK,OK,Bn,S@0.00,22.00	ESC_E14		This study	Mmu
Aifm3	MmuEX0004425	21	3.69	0	Kidney	SOK,SOK,SOK,Bn,S@0.00,127.00	Kidney_a		This study	Mmu
Aifm3	MmuEX0004425	21	3.69	0.69	Kidney	SOK,SOK,SOK,Bn,S@1.24,178.76	Kidney_b		This study	Mmu
Aifm3	MmuEX0004425	21	3.69	1.66	Kidney	OK,OK,OK,Bn,S@1.25,73.76	Kidney_c		This study	Mmu
Aifm3	MmuEX0004425	21	4.74	0	Liver	OK,OK,OK,Bn,S@0.00,32.00	Liver_a		This study	Mmu
Aifm3	MmuEX0004425	21	4.74	0	Liver	OK,OK,OK,Bn,S@0.00,53.00	Liver_b		This study	Mmu
Aifm3	MmuEX0004425	21	4.74	0	Liver	LOW,LOW,VLOW,Bn,C1@0.00,16.00	Liver_c		This study	Mmu
Aifm3	MmuEX0004425	21	18.11	0	Lung	OK,OK,OK,Bn,S@0.00,24.00	Lung_c		This study	Mmu
Aifm3	MmuEX0004425	21	60.9	0	Spleen	OK,OK,OK,Bn,S@0.00,79.00	Spleen_c		This study	Mmu
Aifm3	MmuEX0004425	21	3.78	0	Testis	OK,OK,OK,Bn,S@0.00,27.00	Testis_a		This study	Mmu
Aifm3	MmuEX0004425	21	3.78	0	Testis	OK,OK,LOW,Bn,S@0.00,20.00	Testis_b		This study	Mmu
Aifm3	MmuEX0004425	21	3.78	0	Testis	OK,OK,OK,Bn,S@0.00,21.00	Testis_c		This study	Mmu
Aifm3	MmuEX0004425	21	83.21	57.14	Brain	SOK,SOK,SOK,OK,C1@284.56,213.44	Whole_Brain_a		This study	Mmu
Aifm3	MmuEX0004425	21	83.21	54.05	Brain	SOK,SOK,SOK,B1,C1@142.69,121.31	Whole_Brain_b		This study	Mmu
Arhgap10	MmuEX0005770	66	95.17	94.06	Cerebellum	OK,OK,OK,OK,C1@92.18,5.82	Cerebellum_a		This study	Mmu
Arhgap10	MmuEX0005770	66	95.17	86.25	Cerebellum	SOK,SOK,SOK,OK,S@128.51,20.49	Cerebellum_b		This study	Mmu
Arhgap10	MmuEX0005770	66	95.17	89.31	Cerebellum	SOK,SOK,SOK,OK,C1@110.74,13.26	Cerebellum_c		This study	Mmu
Arhgap10	MmuEX0005770	66	100	96	ESC_E14	SOK,SOK,SOK,OK,C1@141.12,5.88	ESC_E14		This study	Mmu
Arhgap10	MmuEX0005770	66	65.2	34.9	Heart	SOK,SOK,SOK,OK,C1@70.15,130.85	Heart_a		This study	Mmu
Arhgap10	MmuEX0005770	66	65.2	59.14	Heart	OK,OK,OK,OK,S@43.76,30.24	Heart_b		This study	Mmu
Arhgap10	MmuEX0005770	66	65.2	50	Heart	SOK,SOK,SOK,OK,S@70.50,70.50	Heart_c		This study	Mmu
Arhgap10	MmuEX0005770	66	65.2	37.02	Heart	SOK,SOK,SOK,B2,S@146.60,249.40	Heart_d		This study	Mmu
Arhgap10	MmuEX0005770	66	100	100	Kidney	SOK,SOK,SOK,OK,S@270.00,0.00	Kidney_a		This study	Mmu
Arhgap10	MmuEX0005770	66	100	99.48	Kidney	SOK,SOK,SOK,OK,S@768.98,4.02	Kidney_b		This study	Mmu
Arhgap10	MmuEX0005770	66	100	99.39	Kidney	SOK,SOK,SOK,OK,S@323.02,1.98	Kidney_c		This study	Mmu
Arhgap10	MmuEX0005770	66	100	95.45	Lung	OK,OK,OK,OK,S@82.09,3.91	Lung_a		This study	Mmu
Arhgap10	MmuEX0005770	66	100	97.08	Lung	SOK,SOK,SOK,OK,S@262.12,7.88	Lung_c		This study	Mmu
Arhgap10	MmuEX0005770	66	100	97.12	Lung	SOK,SOK,SOK,OK,S@133.05,3.95	Lung_d		This study	Mmu
Arhgap10	MmuEX0005770	66	97.09	92.45	Sk muscle	SOK,SOK,SOK,OK,C1@141.45,11.55	Muscle_a		This study	Mmu
Arhgap10	MmuEX0005770	66	97.09	88.67	Sk muscle	SOK,SOK,SOK,OK,C1@605.62,77.38	Muscle_b		This study	Mmu
Arhgap10	MmuEX0005770	66	97.09	89.63	Sk muscle	SOK,SOK,SOK,OK,C1@114.73,13.27	Muscle_c		This study	Mmu
Arhgap10	MmuEX0005770	66	100	98.12	Ovary	SOK,SOK,SOK,OK,S@518.07,9.93	Ovary_b		This study	Mmu
Arhgap10	MmuEX0005770	66	100	100	Spleen	OK,OK,OK,OK,S@45.00,0.00	Spleen_a		This study	Mmu
Arhgap10	MmuEX0005770	66	100	100	Spleen	SOK,SOK,SOK,OK,S@172.00,0.00	Spleen_b		This study	Mmu
Arhgap10	MmuEX0005770	66	100	99.37	Spleen	SOK,SOK,SOK,OK,S@316.00,2.00	Spleen_c		This study	Mmu
Arhgap10	MmuEX0005770	66	100	100	Stomach	SOK,SOK,SOK,OK,S@157.00,0.00	Stomach_b		This study	Mmu
Arhgap10	MmuEX0005770	66	100	93.44	Stomach	SOK,SOK,SOK,OK,C1@110.26,7.74	Stomach_c		This study	Mmu
Arhgap10	MmuEX0005770	66	100	97.52	Testis	SOK,SOK,SOK,OK,S@155.06,3.94	Testis_a		This study	Mmu
Arhgap10	MmuEX0005770	66	100	94.37	Testis	OK,OK,OK,OK,S@65.12,3.88	Testis_b		This study	Mmu
Arhgap10	MmuEX0005770	66	100	98.43	Testis	SOK,SOK,SOK,OK,S@249.03,3.97	Testis_c		This study	Mmu
Arhgap10	MmuEX0005770	66	95.63	78.35	Brain	SOK,SOK,SOK,OK,S@135.55,37.45	Whole_Brain_a		This study	Mmu
Arhgap10	MmuEX0005770	66	95.63	68.42	Brain	SOK,SOK,SOK,OK,S@98.52,45.48	Whole_Brain_b		This study	Mmu
Axin1	MmuEX0007151	108	20	22.31	Cerebellum	SOK,SOK,SOK,OK,S@29.90,104.10	Cerebellum_a		This study	Mmu
Axin1	MmuEX0007151	108	20	19.13	Cerebellum	OK,OK,OK,OK,S@7.27,30.73	Cerebellum_b		This study	Mmu
Axin1	MmuEX0007151	108	20	24.03	Cerebellum	SOK,SOK,SOK,OK,S@39.17,123.83	Cerebellum_c		This study	Mmu
Axin1	MmuEX0007151	108	23	39.44	Heart	OK,OK,OK,OK,S@32.34,49.66	Heart_a		This study	Mmu
Axin1	MmuEX0007151	108	23	37.33	Heart	OK,OK,OK,B1,S@17.55,29.45	Heart_b		This study	Mmu
Axin1	MmuEX0007151	108	23	25.19	Heart	OK,OK,OK,B1,S@17.38,51.62	Heart_c		This study	Mmu
Axin1	MmuEX0007151	108	39	49.19	Kidney	SOK,SOK,SOK,OK,S@102.32,105.68	Kidney_a		This study	Mmu
Axin1	MmuEX0007151	108	39	42.11	Kidney	SOK,SOK,SOK,OK,S@151.60,208.40	Kidney_b		This study	Mmu
Axin1	MmuEX0007151	108	39	40.87	Kidney	SOK,SOK,SOK,OK,S@110.35,159.65	Kidney_c		This study	Mmu
Axin1	MmuEX0007151	108	43	51.27	Liver	SOK,SOK,SOK,OK,S@77.93,74.07	Liver_a		This study	Mmu
Axin1	MmuEX0007151	108	43	52.16	Liver	SOK,SOK,SOK,OK,S@115.80,106.20	Liver_b		This study	Mmu
Axin1	MmuEX0007151	108	43	36.51	Liver	OK,OK,OK,OK,S@33.22,57.78	Liver_c		This study	Mmu
Axin1	MmuEX0007151	108	35	39.97	Lung	SOK,SOK,SOK,OK,S@62.35,93.65	Lung_a		This study	Mmu
Axin1	MmuEX0007151	108	35	29.43	Lung	SOK,SOK,SOK,OK,S@202.18,484.82	Lung_c		This study	Mmu
Axin1	MmuEX0007151	108	35	34.1	Lung	SOK,SOK,SOK,OK,S@126.51,244.49	Lung_d		This study	Mmu
Axin1	MmuEX0007151	108	25	41.85	Spleen	SOK,SOK,SOK,OK,S@164.47,228.53	Spleen_a		This study	Mmu
Axin1	MmuEX0007151	108	25	37.11	Spleen	SOK,SOK,SOK,B1,S@242.70,411.30	Spleen_b		This study	Mmu
Axin1	MmuEX0007151	108	25	50.08	Spleen	SOK,SOK,SOK,OK,S@57.59,57.41	Spleen_c		This study	Mmu
Axin1	MmuEX0007151	108	42	55.17	Testis	SOK,SOK,SOK,OK,S@189.78,154.22	Testis_a		This study	Mmu
Axin1	MmuEX0007151	108	42	58.55	Testis	SOK,SOK,SOK,OK,S@98.95,70.05	Testis_b		This study	Mmu
Axin1	MmuEX0007151	108	42	40.77	Testis	SOK,SOK,SOK,OK,S@325.75,473.25	Testis_c		This study	Mmu
Abcd3	MmuEX0011530	70	48.43	43.13	Cerebellum	SOK,SOK,SOK,OK,S@291.99,385.01	Cerebellum_a		This study	Mmu
Abcd3	MmuEX0011530	70	48.43	32.88	Cerebellum	SOK,SOK,SOK,OK,S@160.78,328.22	Cerebellum_b		This study	Mmu
Abcd3	MmuEX0011530	70	48.43	47.46	Cerebellum	SOK,SOK,SOK,OK,S@447.55,495.45	Cerebellum_c		This study	Mmu
Abcd3	MmuEX0011530	70	4.55	2.47	ESC_E14	SOK,SOK,SOK,OK,S@6.15,242.85	ESC_E14		This study	Mmu
Abcd3	MmuEX0011530	70	3.09	1.14	Heart	OK,OK,OK,Bn,S@1.01,87.99	Heart_a		This study	Mmu
Abcd3	MmuEX0011530	70	3.09	0.85	Heart	SOK,SOK,SOK,Bn,S@1.00,117.00	Heart_b		This study	Mmu
Abcd3	MmuEX0011530	70	3.09	2	Heart	SOK,SOK,SOK,B1,S@3.06,149.94	Heart_c		This study	Mmu
Abcd3	MmuEX0011530	70	1.78	0.86	Kidney	SOK,SOK,SOK,Bn,S@1.01,115.99	Kidney_a		This study	Mmu
Abcd3	MmuEX0011530	70	1.78	0	Kidney	OK,OK,OK,Bn,S@0.00,27.00	Kidney_b		This study	Mmu
Abcd3	MmuEX0011530	70	1.78	0	Kidney	OK,OK,OK,Bn,C1@0.00,75.00	Kidney_c		This study	Mmu
Abcd3	MmuEX0011530	70	0	0	Liver	OK,OK,OK,Bn,S@0.00,39.00	Liver_a		This study	Mmu
Abcd3	MmuEX0011530	70	0	0	Liver	LOW,LOW,LOW,Bn,S@0.00,16.00	Liver_b		This study	Mmu
Abcd3	MmuEX0011530	70	0	0	Liver	LOW,LOW,VLOW,Bn,C1@0.00,15.00	Liver_c		This study	Mmu
Abcd3	MmuEX0011530	70	0	0.21	Lung	SOK,SOK,SOK,Bn,S@0.51,240.49	Lung_a		This study	Mmu
Abcd3	MmuEX0011530	70	0	0	Lung	SOK,SOK,SOK,Bn,S@0.00,134.00	Lung_c		This study	Mmu
Abcd3	MmuEX0011530	70	0	0	Lung	SOK,SOK,SOK,Bn,S@0.00,146.00	Lung_d		This study	Mmu
Abcd3	MmuEX0011530	70	4.34	0	Sk muscle	OK,OK,OK,Bn,C1@0.00,28.00	Muscle_a		This study	Mmu
Abcd3	MmuEX0011530	70	4.34	0	Sk muscle	OK,OK,OK,Bn,S@0.00,96.00	Muscle_b		This study	Mmu
Abcd3	MmuEX0011530	70	4.34	0	Sk muscle	OK,OK,OK,Bn,S@0.00,35.00	Muscle_c		This study	Mmu
Abcd3	MmuEX0011530	70	0.97	0.16	Ovary	SOK,SOK,SOK,Bn,S@0.51,318.49	Ovary_a		This study	Mmu
Abcd3	MmuEX0011530	70	0.97	0	Ovary	SOK,SOK,SOK,Bn,S@0.00,160.00	Ovary_b		This study	Mmu
Abcd3	MmuEX0011530	70	0	0	Spleen	SOK,SOK,SOK,Bn,S@0.00,195.00	Spleen_a		This study	Mmu
Abcd3	MmuEX0011530	70	0	0	Spleen	SOK,SOK,SOK,Bn,S@0.00,137.00	Spleen_b		This study	Mmu
Abcd3	MmuEX0011530	70	0	0	Spleen	LOW,LOW,LOW,Bn,S@0.00,16.00	Spleen_c		This study	Mmu
Abcd3	MmuEX0011530	70	1.58	3.9	Stomach	OK,OK,OK,Bn,S@3.12,76.88	Stomach_a		This study	Mmu
Abcd3	MmuEX0011530	70	1.58	0	Stomach	OK,OK,OK,Bn,S@0.00,25.00	Stomach_b		This study	Mmu
Abcd3	MmuEX0011530	70	9.65	6.54	Testis	OK,OK,OK,B1,S@3.73,53.27	Testis_a		This study	Mmu
Abcd3	MmuEX0011530	70	9.65	4.76	Testis	OK,OK,OK,OK,S@1.57,31.43	Testis_b		This study	Mmu
Abcd3	MmuEX0011530	70	9.65	2.82	Testis	SOK,SOK,SOK,OK,S@5.13,176.87	Testis_c		This study	Mmu
Abcd3	MmuEX0011530	70	49.41	25.39	Brain	SOK,SOK,SOK,OK,S@144.22,423.78	Whole_Brain_a		This study	Mmu
Abcd3	MmuEX0011530	70	49.41	32.49	Brain	SOK,SOK,SOK,OK,S@237.83,494.17	Whole_Brain_b		This study	Mmu
Cnot4	MmuEX0011930	213	47	83.74	Cerebellum	SOK,SOK,SOK,B1,S@189.25,36.75	Cerebellum_a		This study	Mmu
Cnot4	MmuEX0011930	213	47	81.82	Cerebellum	SOK,SOK,SOK,B1,S@319.10,70.90	Cerebellum_c		This study	Mmu
Cnot4	MmuEX0011930	213	50	66.34	Heart	OK,OK,OK,B1,S@55.73,28.27	Heart_a		This study	Mmu
Cnot4	MmuEX0011930	213	50	68.51	Heart	SOK,SOK,SOK,B1,S@135.65,62.35	Heart_b		This study	Mmu
Cnot4	MmuEX0011930	213	50	67.82	Heart	SOK,SOK,SOK,B1,S@148.53,70.47	Heart_c		This study	Mmu
Cnot4	MmuEX0011930	213	50	39.13	Heart	SOK,SOK,SOK,B2,S@56.35,87.65	Heart_d		This study	Mmu
Cnot4	MmuEX0011930	213	60	74.17	Kidney	SOK,SOK,SOK,B1,S@350.08,121.92	Kidney_a		This study	Mmu
Cnot4	MmuEX0011930	213	60	66.48	Kidney	SOK,SOK,SOK,OK,S@99.06,49.94	Kidney_b		This study	Mmu
Cnot4	MmuEX0011930	213	60	78.86	Kidney	SOK,SOK,SOK,OK,S@86.75,23.25	Kidney_c		This study	Mmu
Cnot4	MmuEX0011930	213	58	86.87	Liver	SOK,SOK,SOK,B2,S@210.23,31.77	Liver_a		This study	Mmu
Cnot4	MmuEX0011930	213	58	82.61	Liver	OK,OK,OK,OK,S@69.39,14.61	Liver_b		This study	Mmu
Cnot4	MmuEX0011930	213	58	80.48	Liver	OK,OK,OK,OK,S@37.02,8.98	Liver_c		This study	Mmu
Cnot4	MmuEX0011930	213	61	78.24	Lung	SOK,SOK,SOK,B1,S@134.57,37.43	Lung_a		This study	Mmu
Cnot4	MmuEX0011930	213	61	82.95	Lung	SOK,SOK,SOK,B1,S@329.31,67.69	Lung_c		This study	Mmu
Cnot4	MmuEX0011930	213	61	80.3	Lung	SOK,SOK,SOK,OK,S@146.95,36.05	Lung_d		This study	Mmu
Cnot4	MmuEX0011930	213	63	77.97	Spleen	SOK,SOK,SOK,B1,S@315.00,89.00	Spleen_a		This study	Mmu
Cnot4	MmuEX0011930	213	63	74.05	Spleen	SOK,SOK,SOK,B1,S@273.24,95.76	Spleen_b		This study	Mmu
Cnot4	MmuEX0011930	213	63	66.04	Spleen	LOW,LOW,LOW,OK,S@29.06,14.94	Spleen_c		This study	Mmu
Cnot4	MmuEX0011930	213	72	83.6	Testis	SOK,SOK,SOK,OK,S@1001.53,196.47	Testis_a		This study	Mmu
Cnot4	MmuEX0011930	213	72	89.86	Testis	SOK,SOK,SOK,OK,S@1850.22,208.78	Testis_b		This study	Mmu
Cnot4	MmuEX0011930	213	72	86.53	Testis	SOK,SOK,SOK,OK,S@1258.15,195.85	Testis_c		This study	Mmu
Fkbp14	MmuEX0019273	90	5.56	7.09	Cerebellum	OK,OK,OK,OK,S@4.82,63.18	Cerebellum_a		This study	Mmu
Fkbp14	MmuEX0019273	90	5.56	1.59	Cerebellum	OK,OK,OK,Bn,S@0.51,31.49	Cerebellum_b		This study	Mmu
Fkbp14	MmuEX0019273	90	5.56	8.98	Cerebellum	OK,OK,OK,OK,S@8.17,82.83	Cerebellum_c		This study	Mmu
Fkbp14	MmuEX0019273	90	5.36	2.72	ESC_E14	SOK,SOK,SOK,OK,S@3.59,128.41	ESC_E14		This study	Mmu
Fkbp14	MmuEX0019273	90	1.58	0	Heart	OK,OK,OK,Bn,S@0.00,31.00	Heart_a		This study	Mmu
Fkbp14	MmuEX0019273	90	1.58	2.7	Heart	OK,OK,OK,Bn,S@1.03,36.97	Heart_b		This study	Mmu
Fkbp14	MmuEX0019273	90	1.58	1.79	Heart	OK,OK,OK,Bn,S@1.02,55.98	Heart_c		This study	Mmu
Fkbp14	MmuEX0019273	90	41.51	32.5	Kidney	OK,OK,OK,OK,S@17.23,35.78	Kidney_a		This study	Mmu
Fkbp14	MmuEX0019273	90	41.51	50	Kidney	OK,OK,OK,OK,S@48.00,48.00	Kidney_b		This study	Mmu
Fkbp14	MmuEX0019273	90	41.51	27.54	Kidney	OK,OK,OK,B1,S@24.24,63.76	Kidney_c		This study	Mmu
Fkbp14	MmuEX0019273	90	21.22	59.18	Liver	LOW,LOW,LOW,OK,S@23.08,15.92	Liver_a		This study	Mmu
Fkbp14	MmuEX0019273	90	0	1.2	Lung	OK,OK,OK,Bn,S@0.50,41.50	Lung_a		This study	Mmu
Fkbp14	MmuEX0019273	90	0	0.91	Lung	SOK,SOK,SOK,OK,S@3.03,329.97	Lung_c		This study	Mmu
Fkbp14	MmuEX0019273	90	0	3.19	Lung	SOK,SOK,SOK,OK,S@5.68,172.32	Lung_d		This study	Mmu
Fkbp14	MmuEX0019273	90	2.61	0	Sk muscle	OK,OK,OK,Bn,S@0.00,81.00	Muscle_b		This study	Mmu
Fkbp14	MmuEX0019273	90	2.51	2.04	Ovary	SOK,SOK,SOK,B1,S@4.08,195.92	Ovary_b		This study	Mmu
Fkbp14	MmuEX0019273	90	0	2.7	Spleen	OK,OK,OK,OK,S@1.54,55.46	Spleen_b		This study	Mmu
Fkbp14	MmuEX0019273	90	48.84	37.14	Stomach	OK,OK,OK,OK,S@17.83,30.17	Stomach_c		This study	Mmu
Fkbp14	MmuEX0019273	90	8.65	5.45	Testis	SOK,SOK,SOK,B1,S@9.48,164.52	Testis_a		This study	Mmu
Fkbp14	MmuEX0019273	90	8.65	21.05	Testis	OK,OK,OK,B1,S@9.68,36.32	Testis_b		This study	Mmu
Fkbp14	MmuEX0019273	90	8.65	3.83	Testis	SOK,SOK,SOK,OK,S@11.95,300.05	Testis_c		This study	Mmu
Fkbp14	MmuEX0019273	90	10.41	1.75	Brain	OK,OK,OK,Bn,S@0.51,28.49	Whole_Brain_a		This study	Mmu
Fkbp14	MmuEX0019273	90	10.41	8.5	Brain	OK,OK,OK,OK,S@7.06,75.95	Whole_Brain_b		This study	Mmu
Foxj3	MmuEX0019546	102	63	52.68	Cerebellum	SOK,SOK,SOK,OK,S@180.17,161.83	Cerebellum_a		This study	Mmu
Foxj3	MmuEX0019546	102	63	59.38	Cerebellum	SOK,SOK,SOK,B1,S@60.57,41.43	Cerebellum_b		This study	Mmu
Foxj3	MmuEX0019546	102	63	51.38	Cerebellum	SOK,SOK,SOK,OK,S@267.18,252.82	Cerebellum_c		This study	Mmu
Foxj3	MmuEX0019546	102	32	21.37	Heart	OK,OK,OK,OK,S@15.17,55.83	Heart_a		This study	Mmu
Foxj3	MmuEX0019546	102	32	21.32	Heart	SOK,SOK,SOK,B2,S@35.18,129.82	Heart_b		This study	Mmu
Foxj3	MmuEX0019546	102	32	24.27	Heart	SOK,SOK,SOK,B1,S@46.60,145.40	Heart_c		This study	Mmu
Foxj3	MmuEX0019546	102	70	58.92	Kidney	SOK,SOK,SOK,B1,S@191.49,133.51	Kidney_a		This study	Mmu
Foxj3	MmuEX0019546	102	70	61.96	Kidney	SOK,SOK,SOK,B1,S@81.79,50.21	Kidney_b		This study	Mmu
Foxj3	MmuEX0019546	102	70	64.32	Kidney	SOK,SOK,SOK,OK,S@97.77,54.23	Kidney_c		This study	Mmu
Foxj3	MmuEX0019546	102	57	33.33	Liver	OK,OK,OK,B2,S@22.00,44.00	Liver_a		This study	Mmu
Foxj3	MmuEX0019546	102	57	64.71	Liver	OK,OK,OK,OK,S@45.30,24.70	Liver_b		This study	Mmu
Foxj3	MmuEX0019546	102	36	53.96	Lung	SOK,SOK,SOK,B1,S@110.08,93.92	Lung_a		This study	Mmu
Foxj3	MmuEX0019546	102	36	40.31	Lung	SOK,SOK,SOK,OK,S@164.87,244.13	Lung_c		This study	Mmu
Foxj3	MmuEX0019546	102	36	48.74	Lung	SOK,SOK,SOK,OK,S@100.40,105.60	Lung_d		This study	Mmu
Foxj3	MmuEX0019546	102	28	51.44	Spleen	SOK,SOK,SOK,B1,S@94.65,89.35	Spleen_a		This study	Mmu
Foxj3	MmuEX0019546	102	28	56.2	Spleen	SOK,SOK,SOK,OK,S@180.40,140.60	Spleen_b		This study	Mmu
Foxj3	MmuEX0019546	102	28	61.76	Spleen	OK,OK,OK,OK,S@33.97,21.03	Spleen_c		This study	Mmu
Foxj3	MmuEX0019546	102	75	70.99	Testis	SOK,SOK,SOK,B1,S@79.51,32.49	Testis_a		This study	Mmu
Foxj3	MmuEX0019546	102	75	71.05	Testis	SOK,SOK,SOK,B1,S@92.37,37.63	Testis_b		This study	Mmu
Foxj3	MmuEX0019546	102	75	75.2	Testis	SOK,SOK,SOK,OK,S@249.66,82.34	Testis_c		This study	Mmu
Hdac7	MmuEX0022512	111	35	54.26	Cerebellum	SOK,SOK,SOK,OK,S@107.98,91.02	Cerebellum_a		This study	Mmu
Hdac7	MmuEX0022512	111	35	49.58	Cerebellum	SOK,SOK,SOK,OK,S@175.02,177.98	Cerebellum_c		This study	Mmu
Hdac7	MmuEX0022512	111	21	34.27	Heart	OK,OK,OK,B1,S@32.90,63.10	Heart_a		This study	Mmu
Hdac7	MmuEX0022512	111	21	39.16	Heart	SOK,SOK,SOK,OK,S@168.39,261.61	Heart_b		This study	Mmu
Hdac7	MmuEX0022512	111	21	38.96	Heart	SOK,SOK,SOK,OK,S@176.49,276.51	Heart_c		This study	Mmu
Hdac7	MmuEX0022512	111	33	37.94	Kidney	SOK,SOK,SOK,OK,S@238.64,390.36	Kidney_a		This study	Mmu
Hdac7	MmuEX0022512	111	33	27.4	Kidney	OK,OK,OK,B1,S@25.48,67.52	Kidney_b		This study	Mmu
Hdac7	MmuEX0022512	111	33	45.21	Kidney	SOK,SOK,SOK,OK,S@47.92,58.08	Kidney_c		This study	Mmu
Hdac7	MmuEX0022512	111	19	52.76	Liver	OK,OK,OK,OK,S@51.18,45.82	Liver_a		This study	Mmu
Hdac7	MmuEX0022512	111	26	34.61	Lung	SOK,SOK,SOK,OK,S@1189.89,2248.11	Lung_a		This study	Mmu
Hdac7	MmuEX0022512	111	26	40.38	Lung	SOK,SOK,SOK,OK,S@399.36,589.64	Lung_c		This study	Mmu
Hdac7	MmuEX0022512	111	26	44.25	Lung	SOK,SOK,SOK,OK,S@385.86,486.14	Lung_d		This study	Mmu
Hdac7	MmuEX0022512	111	15	33.17	Spleen	SOK,SOK,SOK,OK,S@637.86,1285.14	Spleen_a		This study	Mmu
Hdac7	MmuEX0022512	111	15	24.07	Spleen	SOK,SOK,SOK,OK,S@192.32,606.68	Spleen_b		This study	Mmu
Hdac7	MmuEX0022512	111	26	44.61	Stomach	SOK,SOK,SOK,OK,S@221.27,274.73	Stomach_a		This study	Mmu
Hdac7	MmuEX0022512	111	26	55.56	Stomach	LOW,LOW,LOW,OK,S@23.34,18.66	Stomach_b		This study	Mmu
Hdac7	MmuEX0022512	111	29	31.82	Testis	LOW,LOW,LOW,OK,S@9.23,19.77	Testis_a		This study	Mmu
Hdac7	MmuEX0022512	111	29	28.77	Testis	OK,OK,OK,OK,S@13.52,33.48	Testis_b		This study	Mmu
Ifi30	MmuEX0023618	77	0	0	Cerebellum	OK,OK,OK,Bn,S@0.00,92.00	Cerebellum_a		This study	Mmu
Ifi30	MmuEX0023618	77	0	0	Cerebellum	SOK,SOK,SOK,Bn,S@0.00,151.00	Cerebellum_c		This study	Mmu
Ifi30	MmuEX0023618	77	0	0.1	ESC_E14	SOK,SOK,SOK,Bn,S@0.48,480.52	ESC_E14		This study	Mmu
Ifi30	MmuEX0023618	77	7.51	0	Heart	OK,OK,OK,Bn,S@0.00,56.00	Heart_a		This study	Mmu
Ifi30	MmuEX0023618	77	7.51	0	Heart	OK,OK,OK,Bn,S@0.00,44.00	Heart_b		This study	Mmu
Ifi30	MmuEX0023618	77	7.51	0	Heart	OK,OK,OK,Bn,S@0.00,57.00	Heart_c		This study	Mmu
Ifi30	MmuEX0023618	77	0	0	Kidney	SOK,SOK,SOK,Bn,S@0.00,866.00	Kidney_a		This study	Mmu
Ifi30	MmuEX0023618	77	0	0	Kidney	SOK,SOK,SOK,Bn,S@0.00,520.00	Kidney_b		This study	Mmu
Ifi30	MmuEX0023618	77	0	0	Kidney	SOK,SOK,SOK,Bn,S@0.00,402.00	Kidney_c		This study	Mmu
Ifi30	MmuEX0023618	77	40.91	49.56	Liver	SOK,SOK,SOK,B2,S@251.27,255.73	Liver_a		This study	Mmu
Ifi30	MmuEX0023618	77	40.91	62.28	Liver	SOK,SOK,SOK,B2,S@168.78,102.22	Liver_b		This study	Mmu
Ifi30	MmuEX0023618	77	40.91	51.13	Liver	SOK,SOK,SOK,B2,S@85.39,81.61	Liver_c		This study	Mmu
Ifi30	MmuEX0023618	77	0	0.14	Lung	SOK,SOK,SOK,Bn,S@0.98,699.02	Lung_a		This study	Mmu
Ifi30	MmuEX0023618	77	0	0.14	Lung	SOK,SOK,SOK,Bn,S@0.99,707.01	Lung_c		This study	Mmu
Ifi30	MmuEX0023618	77	0	0	Lung	SOK,SOK,SOK,Bn,S@0.00,699.00	Lung_d		This study	Mmu
Ifi30	MmuEX0023618	77	5.71	0	Sk muscle	OK,OK,OK,Bn,S@0.00,31.00	Muscle_a		This study	Mmu
Ifi30	MmuEX0023618	77	5.71	0	Sk muscle	OK,OK,OK,Bn,S@0.00,97.00	Muscle_b		This study	Mmu
Ifi30	MmuEX0023618	77	2.8	0	Ovary	SOK,SOK,SOK,Bn,S@0.00,200.00	Ovary_a		This study	Mmu
Ifi30	MmuEX0023618	77	2.8	0.52	Ovary	SOK,SOK,SOK,Bn,S@1.01,193.99	Ovary_b		This study	Mmu
Ifi30	MmuEX0023618	77	0	0.02	Spleen	SOK,SOK,SOK,Bn,S@0.50,2501.50	Spleen_a		This study	Mmu
Ifi30	MmuEX0023618	77	0	0.07	Spleen	SOK,SOK,SOK,OK,S@3.03,4325.97	Spleen_b		This study	Mmu
Ifi30	MmuEX0023618	77	0	0	Spleen	SOK,SOK,SOK,Bn,S@0.00,160.00	Spleen_c		This study	Mmu
Ifi30	MmuEX0023618	77	3.22	3.35	Stomach	SOK,SOK,SOK,B2,S@29.48,850.52	Stomach_a		This study	Mmu
Ifi30	MmuEX0023618	77	3.22	0.48	Stomach	SOK,SOK,SOK,Bn,S@4.48,929.52	Stomach_b		This study	Mmu
Ifi30	MmuEX0023618	77	3.22	1.69	Stomach	SOK,SOK,SOK,B2,S@28.48,1656.52	Stomach_c		This study	Mmu
Ifi30	MmuEX0023618	77	2.12	0	Testis	OK,OK,OK,Bn,S@0.00,58.00	Testis_a		This study	Mmu
Ifi30	MmuEX0023618	77	2.12	2.22	Testis	OK,OK,OK,Bn,S@1.53,67.47	Testis_b		This study	Mmu
Ifi30	MmuEX0023618	77	2.12	0	Testis	OK,OK,OK,Bn,S@0.00,68.00	Testis_c		This study	Mmu
Ifi30	MmuEX0023618	77	0	0	Brain	OK,OK,OK,Bn,S@0.00,20.00	Whole_Brain_a		This study	Mmu
Ifi30	MmuEX0023618	77	0	0	Brain	OK,OK,OK,Bn,S@0.00,21.00	Whole_Brain_b		This study	Mmu
Kat5	MmuEX0024981	156	40	60.17	Cerebellum	SOK,SOK,SOK,OK,S@464.51,307.49	Cerebellum_a		This study	Mmu
Kat5	MmuEX0024981	156	40	45.45	Cerebellum	SOK,SOK,SOK,OK,S@98.17,117.83	Cerebellum_b		This study	Mmu
Kat5	MmuEX0024981	156	40	58.08	Cerebellum	SOK,SOK,SOK,OK,S@784.08,565.92	Cerebellum_c		This study	Mmu
Kat5	MmuEX0024981	156	44	44.88	Heart	OK,OK,OK,OK,S@41.29,50.71	Heart_a		This study	Mmu
Kat5	MmuEX0024981	156	44	80.47	Heart	SOK,SOK,SOK,B1,S@156.11,37.89	Heart_b		This study	Mmu
Kat5	MmuEX0024981	156	44	72.08	Heart	SOK,SOK,SOK,OK,S@164.34,63.66	Heart_c		This study	Mmu
Kat5	MmuEX0024981	156	30	75.76	Kidney	SOK,SOK,SOK,B1,S@417.44,133.56	Kidney_a		This study	Mmu
Kat5	MmuEX0024981	156	30	31.84	Kidney	SOK,SOK,SOK,OK,S@84.38,180.62	Kidney_b		This study	Mmu
Kat5	MmuEX0024981	156	30	33.49	Kidney	SOK,SOK,SOK,OK,S@98.13,194.87	Kidney_c		This study	Mmu
Kat5	MmuEX0024981	156	26	70.66	Liver	SOK,SOK,SOK,OK,S@156.16,64.84	Liver_a		This study	Mmu
Kat5	MmuEX0024981	156	26	38.79	Liver	SOK,SOK,SOK,OK,S@62.45,98.55	Liver_b		This study	Mmu
Kat5	MmuEX0024981	156	26	28.97	Liver	OK,OK,OK,OK,S@19.99,49.01	Liver_c		This study	Mmu
Kat5	MmuEX0024981	156	21	75.51	Lung	SOK,SOK,SOK,OK,S@551.98,179.02	Lung_a		This study	Mmu
Kat5	MmuEX0024981	156	21	39.63	Lung	SOK,SOK,SOK,OK,S@354.69,540.31	Lung_c		This study	Mmu
Kat5	MmuEX0024981	156	21	37.45	Lung	SOK,SOK,SOK,OK,S@137.44,229.56	Lung_d		This study	Mmu
Kat5	MmuEX0024981	156	16	74.46	Spleen	SOK,SOK,SOK,B1,S@447.50,153.50	Spleen_a		This study	Mmu
Kat5	MmuEX0024981	156	16	39.91	Spleen	SOK,SOK,SOK,B1,S@257.42,387.58	Spleen_b		This study	Mmu
Kat5	MmuEX0024981	156	16	38.6	Spleen	OK,OK,OK,OK,S@30.49,48.51	Spleen_c		This study	Mmu
Kat5	MmuEX0024981	156	27	92.02	Stomach	SOK,SOK,SOK,B1,S@332.19,28.81	Stomach_a		This study	Mmu
Kat5	MmuEX0024981	156	27	43.16	Stomach	SOK,SOK,SOK,OK,S@58.70,77.30	Stomach_b		This study	Mmu
Kat5	MmuEX0024981	156	27	39.94	Stomach	SOK,SOK,SOK,OK,S@90.26,135.74	Stomach_c		This study	Mmu
Kat5	MmuEX0024981	156	35	34.17	Testis	SOK,SOK,SOK,B1,S@458.90,884.10	Testis_a		This study	Mmu
Kat5	MmuEX0024981	156	35	75.73	Testis	SOK,SOK,SOK,B1,S@641.43,205.57	Testis_b		This study	Mmu
Kat5	MmuEX0024981	156	35	46.21	Testis	SOK,SOK,SOK,OK,S@762.47,887.54	Testis_c		This study	Mmu
Kdm1a	MmuEX0025261	60	52	44.63	Cerebellum	SOK,SOK,SOK,OK,S@156.21,193.79	Cerebellum_a		This study	Mmu
Kdm1a	MmuEX0025261	60	52	47.16	Cerebellum	SOK,SOK,SOK,B1,S@103.75,116.25	Cerebellum_b		This study	Mmu
Kdm1a	MmuEX0025261	60	52	43.47	Cerebellum	SOK,SOK,SOK,OK,S@217.35,282.65	Cerebellum_c		This study	Mmu
Kdm1a	MmuEX0025261	60	63	64.42	Heart	SOK,SOK,SOK,OK,S@86.32,47.68	Heart_a		This study	Mmu
Kdm1a	MmuEX0025261	60	63	72.65	Heart	SOK,SOK,SOK,OK,S@73.38,27.62	Heart_b		This study	Mmu
Kdm1a	MmuEX0025261	60	63	69.51	Heart	SOK,SOK,SOK,OK,S@96.62,42.38	Heart_c		This study	Mmu
Kdm1a	MmuEX0025261	60	60	77.5	Kidney	SOK,SOK,SOK,OK,S@165.08,47.92	Kidney_a		This study	Mmu
Kdm1a	MmuEX0025261	60	60	63.42	Kidney	SOK,SOK,SOK,OK,S@133.18,76.82	Kidney_b		This study	Mmu
Kdm1a	MmuEX0025261	60	60	54.26	Kidney	SOK,SOK,SOK,OK,S@93.33,78.67	Kidney_c		This study	Mmu
Kdm1a	MmuEX0025261	60	62	60.66	Liver	OK,OK,OK,OK,S@59.45,38.55	Liver_a		This study	Mmu
Kdm1a	MmuEX0025261	60	62	74.07	Liver	OK,OK,OK,OK,S@69.63,24.37	Liver_b		This study	Mmu
Kdm1a	MmuEX0025261	60	62	50.68	Liver	OK,OK,OK,OK,S@27.87,27.13	Liver_c		This study	Mmu
Kdm1a	MmuEX0025261	60	58	83.19	Lung	SOK,SOK,SOK,OK,S@181.35,36.65	Lung_a		This study	Mmu
Kdm1a	MmuEX0025261	60	58	54.79	Lung	SOK,SOK,SOK,OK,S@380.79,314.21	Lung_c		This study	Mmu
Kdm1a	MmuEX0025261	60	58	62.26	Lung	SOK,SOK,SOK,OK,S@214.17,129.83	Lung_d		This study	Mmu
Kdm1a	MmuEX0025261	60	45	67.42	Spleen	SOK,SOK,SOK,OK,S@200.91,97.09	Spleen_a		This study	Mmu
Kdm1a	MmuEX0025261	60	45	66.25	Spleen	SOK,SOK,SOK,OK,S@398.16,202.84	Spleen_b		This study	Mmu
Kdm1a	MmuEX0025261	60	45	58.24	Spleen	OK,OK,OK,OK,S@41.93,30.07	Spleen_c		This study	Mmu
Kdm1a	MmuEX0025261	60	81	80.77	Testis	SOK,SOK,SOK,OK,S@1245.47,296.53	Testis_a		This study	Mmu
Kdm1a	MmuEX0025261	60	81	78.74	Testis	SOK,SOK,SOK,OK,S@536.22,144.78	Testis_b		This study	Mmu
Kdm1a	MmuEX0025261	60	81	70.54	Testis	SOK,SOK,SOK,OK,S@1694.37,707.63	Testis_c		This study	Mmu
Mbd1	MmuEX0028065	168	41	44.44	Cerebellum	SOK,SOK,SOK,OK,S@115.54,144.46	Cerebellum_a		This study	Mmu
Mbd1	MmuEX0028065	168	41	45.95	Cerebellum	OK,OK,OK,OK,S@24.81,29.19	Cerebellum_b		This study	Mmu
Mbd1	MmuEX0028065	168	41	42.9	Cerebellum	SOK,SOK,SOK,OK,S@190.05,252.95	Cerebellum_c		This study	Mmu
Mbd1	MmuEX0028065	168	48	65.52	Heart	OK,OK,OK,OK,S@62.90,33.10	Heart_a		This study	Mmu
Mbd1	MmuEX0028065	168	48	51.62	Heart	SOK,SOK,SOK,OK,S@108.40,101.60	Heart_b		This study	Mmu
Mbd1	MmuEX0028065	168	48	51.16	Heart	SOK,SOK,SOK,OK,S@117.16,111.84	Heart_c		This study	Mmu
Mbd1	MmuEX0028065	168	46	50.66	Kidney	SOK,SOK,SOK,OK,S@230.50,224.50	Kidney_a		This study	Mmu
Mbd1	MmuEX0028065	168	46	55.56	Kidney	SOK,SOK,SOK,B1,S@108.90,87.10	Kidney_b		This study	Mmu
Mbd1	MmuEX0028065	168	46	54.03	Kidney	SOK,SOK,SOK,OK,S@103.20,87.80	Kidney_c		This study	Mmu
Mbd1	MmuEX0028065	168	42	65.79	Liver	SOK,SOK,SOK,OK,S@414.48,215.52	Liver_a		This study	Mmu
Mbd1	MmuEX0028065	168	42	63.1	Liver	SOK,SOK,SOK,OK,S@192.46,112.55	Liver_b		This study	Mmu
Mbd1	MmuEX0028065	168	42	53.54	Liver	OK,OK,OK,OK,S@40.69,35.31	Liver_c		This study	Mmu
Mbd1	MmuEX0028065	168	28	54.85	Lung	SOK,SOK,SOK,OK,S@349.94,288.06	Lung_a		This study	Mmu
Mbd1	MmuEX0028065	168	28	57.13	Lung	SOK,SOK,SOK,OK,S@362.20,271.80	Lung_c		This study	Mmu
Mbd1	MmuEX0028065	168	28	60.28	Lung	SOK,SOK,SOK,OK,S@340.58,224.42	Lung_d		This study	Mmu
Mbd1	MmuEX0028065	168	11	48.31	Spleen	SOK,SOK,SOK,OK,S@382.62,409.38	Spleen_a		This study	Mmu
Mbd1	MmuEX0028065	168	11	44.33	Spleen	SOK,SOK,SOK,B1,S@160.92,202.08	Spleen_b		This study	Mmu
Mbd1	MmuEX0028065	168	11	46.31	Spleen	SOK,SOK,SOK,OK,S@50.48,58.52	Spleen_c		This study	Mmu
Mbd1	MmuEX0028065	168	25	47.06	Stomach	SOK,SOK,SOK,B1,S@164.71,185.29	Stomach_a		This study	Mmu
Mbd1	MmuEX0028065	168	25	41.11	Stomach	SOK,SOK,SOK,OK,S@52.21,74.79	Stomach_b		This study	Mmu
Mbd1	MmuEX0028065	168	25	47.11	Stomach	OK,OK,OK,OK,S@41.93,47.07	Stomach_c		This study	Mmu
Mbd1	MmuEX0028065	168	28	41.25	Testis	SOK,SOK,SOK,OK,S@46.61,66.39	Testis_a		This study	Mmu
Mbd1	MmuEX0028065	168	28	44.09	Testis	SOK,SOK,SOK,OK,S@88.62,112.38	Testis_b		This study	Mmu
Mbd1	MmuEX0028065	168	28	45.41	Testis	SOK,SOK,SOK,OK,S@147.58,177.42	Testis_c		This study	Mmu
Ncor1	MmuEX0031190	27	52	70.73	Cerebellum	SOK,SOK,SOK,B2,S@111.75,46.25	Cerebellum_a		This study	Mmu
Ncor1	MmuEX0031190	27	52	49.69	Cerebellum	SOK,SOK,SOK,OK,S@180.87,183.13	Cerebellum_b		This study	Mmu
Ncor1	MmuEX0031190	27	52	74.08	Cerebellum	SOK,SOK,SOK,B2,S@189.64,66.36	Cerebellum_c		This study	Mmu
Ncor1	MmuEX0031190	27	46	52.24	Heart	OK,OK,OK,B2,S@28.21,25.79	Heart_a		This study	Mmu
Ncor1	MmuEX0031190	27	46	33.27	Heart	SOK,SOK,SOK,B1,S@48.57,97.43	Heart_c		This study	Mmu
Ncor1	MmuEX0031190	27	46	17.04	Heart	SOK,SOK,SOK,B1,S@20.62,100.38	Heart_d		This study	Mmu
Ncor1	MmuEX0031190	27	44	53.62	Kidney	OK,OK,OK,B1,S@34.85,30.15	Kidney_a		This study	Mmu
Ncor1	MmuEX0031190	27	44	39.89	Kidney	SOK,SOK,SOK,OK,S@168.34,253.66	Kidney_b		This study	Mmu
Ncor1	MmuEX0031190	27	44	42.65	Kidney	SOK,SOK,SOK,B1,S@189.37,254.63	Kidney_c		This study	Mmu
Ncor1	MmuEX0031190	27	35	63.64	Liver	LOW,OK,LOW,B1,S@34.37,19.63	Liver_a		This study	Mmu
Ncor1	MmuEX0031190	27	35	37.65	Liver	SOK,SOK,SOK,OK,S@63.63,105.37	Liver_b		This study	Mmu
Ncor1	MmuEX0031190	27	35	43.16	Liver	SOK,SOK,SOK,OK,S@85.46,112.54	Liver_c		This study	Mmu
Ncor1	MmuEX0031190	27	43	52.02	Lung	SOK,SOK,SOK,OK,S@53.58,49.42	Lung_a		This study	Mmu
Ncor1	MmuEX0031190	27	43	48.89	Lung	SOK,SOK,SOK,B1,S@230.27,240.73	Lung_c		This study	Mmu
Ncor1	MmuEX0031190	27	43	53.53	Lung	SOK,SOK,SOK,B1,S@148.81,129.19	Lung_d		This study	Mmu
Ncor1	MmuEX0031190	27	48	67.04	Spleen	SOK,SOK,SOK,B1,S@82.46,40.54	Spleen_a		This study	Mmu
Ncor1	MmuEX0031190	27	48	49.32	Spleen	SOK,SOK,SOK,OK,S@380.26,390.74	Spleen_b		This study	Mmu
Ncor1	MmuEX0031190	27	50	47.01	Testis	SOK,SOK,SOK,OK,S@69.10,77.90	Testis_a		This study	Mmu
Ncor1	MmuEX0031190	27	50	53.68	Testis	SOK,SOK,SOK,B1,S@476.68,411.32	Testis_c		This study	Mmu
Pcgf5	MmuEX0033964	60	34	27.71	Cerebellum	SOK,SOK,SOK,OK,S@29.37,76.63	Cerebellum_a		This study	Mmu
Pcgf5	MmuEX0033964	60	34	28.42	Cerebellum	OK,OK,OK,OK,S@17.34,43.66	Cerebellum_b		This study	Mmu
Pcgf5	MmuEX0033964	60	34	28.81	Cerebellum	SOK,SOK,SOK,B1,S@43.79,108.21	Cerebellum_c		This study	Mmu
Pcgf5	MmuEX0033964	60	37	35.62	Heart	SOK,SOK,SOK,OK,S@77.30,139.70	Heart_a		This study	Mmu
Pcgf5	MmuEX0033964	60	37	42.68	Heart	SOK,SOK,SOK,B1,S@145.54,195.46	Heart_b		This study	Mmu
Pcgf5	MmuEX0033964	60	37	33.96	Heart	SOK,SOK,SOK,B1,S@170.14,330.86	Heart_c		This study	Mmu
Pcgf5	MmuEX0033964	60	37	6.98	Heart	SOK,SOK,SOK,OK,S@8.03,106.97	Heart_d		This study	Mmu
Pcgf5	MmuEX0033964	60	33	51.69	Kidney	SOK,SOK,SOK,OK,S@81.15,75.85	Kidney_a		This study	Mmu
Pcgf5	MmuEX0033964	60	33	38.2	Kidney	SOK,SOK,SOK,B1,S@61.50,99.50	Kidney_b		This study	Mmu
Pcgf5	MmuEX0033964	60	33	27.43	Kidney	SOK,SOK,SOK,OK,S@61.17,161.83	Kidney_c		This study	Mmu
Pcgf5	MmuEX0033964	60	47	40.74	Liver	OK,OK,OK,OK,S@30.96,45.04	Liver_a		This study	Mmu
Pcgf5	MmuEX0033964	60	47	52.38	Liver	SOK,SOK,SOK,B1,S@75.43,68.57	Liver_b		This study	Mmu
Pcgf5	MmuEX0033964	60	47	31.74	Liver	SOK,SOK,SOK,OK,S@34.91,75.09	Liver_c		This study	Mmu
Pcgf5	MmuEX0033964	60	39	60.71	Lung	SOK,SOK,SOK,B1,S@81.96,53.04	Lung_a		This study	Mmu
Pcgf5	MmuEX0033964	60	39	28.9	Lung	SOK,SOK,SOK,OK,S@112.13,275.87	Lung_c		This study	Mmu
Pcgf5	MmuEX0033964	60	39	35.62	Lung	SOK,SOK,SOK,OK,S@77.30,139.70	Lung_d		This study	Mmu
Pcgf5	MmuEX0033964	60	40	49.04	Spleen	SOK,SOK,SOK,OK,S@76.01,78.99	Spleen_a		This study	Mmu
Pcgf5	MmuEX0033964	60	40	35.86	Spleen	SOK,SOK,SOK,B1,S@109.37,195.63	Spleen_b		This study	Mmu
Pcgf5	MmuEX0033964	60	40	45.68	Spleen	OK,OK,OK,B1,S@26.95,32.05	Spleen_c		This study	Mmu
Pcgf5	MmuEX0033964	60	35	23.52	Testis	SOK,SOK,SOK,B1,S@147.00,478.00	Testis_a		This study	Mmu
Pcgf5	MmuEX0033964	60	35	36.19	Testis	SOK,SOK,SOK,B1,S@132.09,232.91	Testis_b		This study	Mmu
Pcgf5	MmuEX0033964	60	35	17.1	Testis	SOK,SOK,SOK,OK,S@307.46,1490.54	Testis_c		This study	Mmu
Ptbp2	MmuEX0037640	34	97.05	95.76	Cerebellum	SOK,SOK,SOK,OK,S@961.43,42.57	Cerebellum_a		This study	Mmu
Ptbp2	MmuEX0037640	34	97.05	98.69	Cerebellum	SOK,SOK,SOK,OK,S@231.92,3.08	Cerebellum_b		This study	Mmu
Ptbp2	MmuEX0037640	34	97.05	95.9	Cerebellum	SOK,SOK,SOK,OK,S@1600.57,68.43	Cerebellum_c		This study	Mmu
Ptbp2	MmuEX0037640	34	98.54	82.14	ESC_E14	SOK,SOK,SOK,OK,S@212.74,46.26	ESC_E14		This study	Mmu
Ptbp2	MmuEX0037640	34	70.65	95.26	Heart	OK,OK,OK,OK,S@60.97,3.03	Heart_a		This study	Mmu
Ptbp2	MmuEX0037640	34	70.65	80.86	Heart	SOK,SOK,SOK,B1,S@164.15,38.85	Heart_b		This study	Mmu
Ptbp2	MmuEX0037640	34	70.65	81.72	Heart	SOK,SOK,SOK,OK,S@187.14,41.86	Heart_c		This study	Mmu
Ptbp2	MmuEX0037640	34	52.88	72.45	Kidney	SOK,SOK,SOK,B1,S@128.24,48.76	Kidney_a		This study	Mmu
Ptbp2	MmuEX0037640	34	52.88	56.45	Kidney	OK,OK,OK,OK,S@32.18,24.82	Kidney_b		This study	Mmu
Ptbp2	MmuEX0037640	34	52.88	51.3	Kidney	OK,OK,OK,OK,S@43.09,40.91	Kidney_c		This study	Mmu
Ptbp2	MmuEX0037640	34	63.23	56.45	Liver	OK,OK,OK,B1,S@37.26,28.74	Liver_a		This study	Mmu
Ptbp2	MmuEX0037640	34	63.23	74.88	Liver	OK,OK,OK,OK,S@41.93,14.07	Liver_b		This study	Mmu
Ptbp2	MmuEX0037640	34	63.23	79.55	Liver	OK,OK,OK,OK,S@33.41,8.59	Liver_c		This study	Mmu
Ptbp2	MmuEX0037640	34	34	44.04	Lung	SOK,SOK,SOK,B2,S@54.61,69.39	Lung_a		This study	Mmu
Ptbp2	MmuEX0037640	34	34	13.22	Lung	SOK,SOK,SOK,OK,S@29.88,196.12	Lung_c		This study	Mmu
Ptbp2	MmuEX0037640	34	34	20.17	Lung	OK,OK,OK,OK,S@16.54,65.46	Lung_d		This study	Mmu
Ptbp2	MmuEX0037640	34	86.46	96.02	Sk muscle	SOK,SOK,SOK,OK,S@146.91,6.09	Muscle_b		This study	Mmu
Ptbp2	MmuEX0037640	34	51.5	58.91	Ovary	SOK,SOK,SOK,B2,S@62.44,43.56	Ovary_a		This study	Mmu
Ptbp2	MmuEX0037640	34	51.5	41.49	Ovary	SOK,SOK,SOK,OK,S@73.85,104.15	Ovary_b		This study	Mmu
Ptbp2	MmuEX0037640	34	11.47	12.1	Spleen	OK,OK,OK,OK,S@9.68,70.32	Spleen_a		This study	Mmu
Ptbp2	MmuEX0037640	34	11.47	6.72	Spleen	SOK,SOK,SOK,OK,S@6.72,93.28	Spleen_b		This study	Mmu
Ptbp2	MmuEX0037640	34	38.57	52.55	Stomach	OK,OK,OK,OK,S@34.16,30.84	Stomach_c		This study	Mmu
Ptbp2	MmuEX0037640	34	91	92.38	Testis	SOK,SOK,SOK,OK,S@618.95,51.05	Testis_a		This study	Mmu
Ptbp2	MmuEX0037640	34	91	88.05	Testis	SOK,SOK,SOK,B1,S@762.51,103.49	Testis_b		This study	Mmu
Ptbp2	MmuEX0037640	34	91	87.04	Testis	SOK,SOK,SOK,OK,S@1423.97,212.03	Testis_c		This study	Mmu
Ptbp2	MmuEX0037640	34	96.92	95.13	Brain	SOK,SOK,SOK,OK,S@503.24,25.76	Whole_Brain_a		This study	Mmu
Ptbp2	MmuEX0037640	34	96.92	96.94	Brain	SOK,SOK,SOK,OK,S@918.02,28.98	Whole_Brain_b		This study	Mmu
Slc9a7	MmuEX0043622	60	6.02	1.31	Cerebellum	SOK,SOK,SOK,B1,S@2.53,190.47	Cerebellum_a		This study	Mmu
Slc9a7	MmuEX0043622	60	6.02	1.79	Cerebellum	SOK,SOK,SOK,OK,S@2.04,111.96	Cerebellum_b		This study	Mmu
Slc9a7	MmuEX0043622	60	6.02	0.79	Cerebellum	SOK,SOK,SOK,OK,S@2.01,251.99	Cerebellum_c		This study	Mmu
Slc9a7	MmuEX0043622	60	84.54	80.95	Heart	LOW,LOW,LOW,OK,S@30.76,7.24	Heart_b		This study	Mmu
Slc9a7	MmuEX0043622	60	84.54	82.61	Heart	OK,OK,OK,OK,S@34.70,7.30	Heart_c		This study	Mmu
Slc9a7	MmuEX0043622	60	89.52	76.62	Kidney	OK,OK,OK,OK,S@52.10,15.90	Kidney_a		This study	Mmu
Slc9a7	MmuEX0043622	60	89.52	92.86	Kidney	LOW,LOW,LOW,OK,S@25.07,1.93	Kidney_c		This study	Mmu
Slc9a7	MmuEX0043622	60	80.96	32.31	Lung	OK,OK,OK,OK,S@13.89,29.11	Lung_a		This study	Mmu
Slc9a7	MmuEX0043622	60	62.14	31.88	Ovary	OK,OK,OK,OK,S@29.01,61.99	Ovary_a		This study	Mmu
Slc9a7	MmuEX0043622	60	62.14	73.65	Ovary	SOK,SOK,SOK,OK,S@213.59,76.41	Ovary_b		This study	Mmu
Slc9a7	MmuEX0043622	60	54.3	29.07	Spleen	SOK,SOK,SOK,OK,S@96.80,236.20	Spleen_a		This study	Mmu
Slc9a7	MmuEX0043622	60	54.3	42.06	Spleen	SOK,SOK,SOK,OK,S@139.22,191.78	Spleen_b		This study	Mmu
Slc9a7	MmuEX0043622	60	8.13	0.84	Brain	OK,OK,OK,Bn,S@0.50,59.50	Whole_Brain_a		This study	Mmu
Slc9a7	MmuEX0043622	60	8.13	2.37	Brain	SOK,SOK,SOK,B1,S@5.12,210.88	Whole_Brain_b		This study	Mmu
Stag2	MmuEX0045244	111	24	49.32	Cerebellum	SOK,SOK,SOK,OK,S@325.51,334.49	Cerebellum_a		This study	Mmu
Stag2	MmuEX0045244	111	24	44.94	Cerebellum	SOK,SOK,SOK,OK,S@115.95,142.05	Cerebellum_b		This study	Mmu
Stag2	MmuEX0045244	111	24	45.2	Cerebellum	SOK,SOK,SOK,OK,S@451.55,547.45	Cerebellum_c		This study	Mmu
Stag2	MmuEX0045244	111	28	42.71	Heart	SOK,SOK,SOK,OK,S@58.51,78.49	Heart_a		This study	Mmu
Stag2	MmuEX0045244	111	28	62.5	Heart	SOK,SOK,SOK,OK,S@113.75,68.25	Heart_b		This study	Mmu
Stag2	MmuEX0045244	111	28	56.83	Heart	SOK,SOK,SOK,OK,S@140.37,106.63	Heart_c		This study	Mmu
Stag2	MmuEX0045244	111	28	61.54	Heart	OK,OK,OK,B2,S@51.69,32.31	Heart_d		This study	Mmu
Stag2	MmuEX0045244	111	14	38.49	Kidney	SOK,SOK,SOK,OK,S@137.79,220.21	Kidney_a		This study	Mmu
Stag2	MmuEX0045244	111	14	17.72	Kidney	SOK,SOK,SOK,OK,S@95.33,442.67	Kidney_b		This study	Mmu
Stag2	MmuEX0045244	111	14	24.95	Kidney	SOK,SOK,SOK,OK,S@166.17,499.83	Kidney_c		This study	Mmu
Stag2	MmuEX0045244	111	6	22.49	Liver	SOK,SOK,SOK,OK,S@39.81,137.19	Liver_a		This study	Mmu
Stag2	MmuEX0045244	111	6	10.49	Liver	SOK,SOK,SOK,OK,S@51.93,443.07	Liver_b		This study	Mmu
Stag2	MmuEX0045244	111	6	18.95	Liver	SOK,SOK,SOK,OK,S@81.48,348.51	Liver_c		This study	Mmu
Stag2	MmuEX0045244	111	14	30.99	Lung	SOK,SOK,SOK,OK,S@178.81,398.19	Lung_a		This study	Mmu
Stag2	MmuEX0045244	111	14	33.71	Lung	SOK,SOK,SOK,OK,S@600.38,1180.62	Lung_c		This study	Mmu
Stag2	MmuEX0045244	111	14	33.95	Lung	SOK,SOK,SOK,OK,S@344.25,669.75	Lung_d		This study	Mmu
Stag2	MmuEX0045244	111	8	28.46	Spleen	SOK,SOK,SOK,OK,S@195.24,490.76	Spleen_a		This study	Mmu
Stag2	MmuEX0045244	111	8	16.7	Spleen	SOK,SOK,SOK,B1,S@362.39,1807.61	Spleen_b		This study	Mmu
Stag2	MmuEX0045244	111	8	28.11	Spleen	SOK,SOK,SOK,OK,S@39.07,99.93	Spleen_c		This study	Mmu
Stag2	MmuEX0045244	111	7	15.91	Stomach	OK,OK,OK,B2,S@8.11,42.89	Stomach_a		This study	Mmu
Stag2	MmuEX0045244	111	7	26.55	Stomach	SOK,SOK,SOK,OK,S@46.20,127.80	Stomach_b		This study	Mmu
Stag2	MmuEX0045244	111	7	24.85	Stomach	SOK,SOK,SOK,OK,S@75.54,228.46	Stomach_c		This study	Mmu
Stag2	MmuEX0045244	111	30	32.5	Testis	SOK,SOK,SOK,B1,S@121.23,251.78	Testis_a		This study	Mmu
Stag2	MmuEX0045244	111	30	54.36	Testis	SOK,SOK,SOK,OK,S@62.51,52.49	Testis_b		This study	Mmu
Stag2	MmuEX0045244	111	30	37.82	Testis	SOK,SOK,SOK,OK,S@232.21,381.79	Testis_c		This study	Mmu
Yap1	MmuEX0052491	48	27	38.82	Cerebellum	OK,OK,OK,OK,S@22.90,36.10	Cerebellum_a		This study	Mmu
Yap1	MmuEX0052491	48	27	34.38	Cerebellum	OK,OK,OK,OK,S@29.57,56.43	Cerebellum_c		This study	Mmu
Yap1	MmuEX0052491	48	25	36.64	Heart	SOK,SOK,SOK,OK,S@105.89,183.11	Heart_a		This study	Mmu
Yap1	MmuEX0052491	48	25	34.15	Heart	SOK,SOK,SOK,OK,S@130.79,252.21	Heart_b		This study	Mmu
Yap1	MmuEX0052491	48	25	32.53	Heart	SOK,SOK,SOK,OK,S@160.37,332.63	Heart_c		This study	Mmu
Yap1	MmuEX0052491	48	34	54.33	Kidney	SOK,SOK,SOK,OK,S@266.22,223.78	Kidney_a		This study	Mmu
Yap1	MmuEX0052491	48	34	46.49	Kidney	SOK,SOK,SOK,OK,S@251.98,290.02	Kidney_b		This study	Mmu
Yap1	MmuEX0052491	48	34	49.12	Kidney	SOK,SOK,SOK,OK,S@207.29,214.71	Kidney_c		This study	Mmu
Yap1	MmuEX0052491	48	43	56.26	Liver	SOK,SOK,SOK,OK,S@207.04,160.96	Liver_a		This study	Mmu
Yap1	MmuEX0052491	48	43	62.6	Liver	SOK,SOK,SOK,OK,S@266.68,159.32	Liver_b		This study	Mmu
Yap1	MmuEX0052491	48	43	52.75	Liver	SOK,SOK,SOK,OK,S@124.49,111.51	Liver_c		This study	Mmu
Yap1	MmuEX0052491	48	61	58.89	Lung	SOK,SOK,SOK,OK,S@320.95,224.05	Lung_a		This study	Mmu
Yap1	MmuEX0052491	48	61	58.28	Lung	SOK,SOK,SOK,OK,S@665.56,476.44	Lung_c		This study	Mmu
Yap1	MmuEX0052491	48	61	64.14	Lung	SOK,SOK,SOK,OK,S@549.04,306.96	Lung_d		This study	Mmu
Yap1	MmuEX0052491	48	30	60.9	Spleen	SOK,SOK,SOK,OK,S@65.16,41.84	Spleen_a		This study	Mmu
Yap1	MmuEX0052491	48	30	64.47	Spleen	SOK,SOK,SOK,OK,S@104.44,57.56	Spleen_b		This study	Mmu
Yap1	MmuEX0052491	48	30	52.76	Spleen	SOK,SOK,SOK,OK,S@80.20,71.80	Spleen_c		This study	Mmu
Yap1	MmuEX0052491	48	60	40.66	Stomach	OK,OK,OK,B1,S@26.02,37.98	Stomach_a		This study	Mmu
Yap1	MmuEX0052491	48	60	67.84	Stomach	SOK,SOK,SOK,OK,S@145.18,68.82	Stomach_b		This study	Mmu
Yap1	MmuEX0052491	48	60	64.94	Stomach	SOK,SOK,SOK,OK,S@164.95,89.05	Stomach_c		This study	Mmu
Yap1	MmuEX0052491	48	37	65.05	Testis	SOK,SOK,SOK,OK,S@255.00,137.00	Testis_a		This study	Mmu
Yap1	MmuEX0052491	48	37	60.68	Testis	SOK,SOK,SOK,OK,S@285.20,184.80	Testis_b		This study	Mmu
Yap1	MmuEX0052491	48	37	46.37	Testis	SOK,SOK,SOK,OK,S@317.63,367.37	Testis_c		This study	Mmu
Zmynd11	MmuEX0053970	162	54	43.36	Cerebellum	SOK,SOK,SOK,B1,S@547.64,715.36	Cerebellum_a		This study	Mmu
Zmynd11	MmuEX0053970	162	54	43.57	Cerebellum	SOK,SOK,SOK,OK,S@211.75,274.25	Cerebellum_b		This study	Mmu
Zmynd11	MmuEX0053970	162	54	42.38	Cerebellum	SOK,SOK,SOK,B1,S@931.94,1267.06	Cerebellum_c		This study	Mmu
Zmynd11	MmuEX0053970	162	48	46.49	Heart	SOK,SOK,SOK,OK,S@131.10,150.90	Heart_a		This study	Mmu
Zmynd11	MmuEX0053970	162	48	50.19	Heart	SOK,SOK,SOK,OK,S@202.77,201.23	Heart_b		This study	Mmu
Zmynd11	MmuEX0053970	162	48	43.3	Heart	SOK,SOK,SOK,OK,S@280.15,366.85	Heart_c		This study	Mmu
Zmynd11	MmuEX0053970	162	48	4.47	Heart	SOK,SOK,SOK,OK,S@13.59,290.41	Heart_d		This study	Mmu
Zmynd11	MmuEX0053970	162	56	51.91	Kidney	SOK,SOK,SOK,OK,S@237.75,220.25	Kidney_a		This study	Mmu
Zmynd11	MmuEX0053970	162	56	41.65	Kidney	SOK,SOK,SOK,OK,S@314.46,440.54	Kidney_b		This study	Mmu
Zmynd11	MmuEX0053970	162	56	59.53	Kidney	SOK,SOK,SOK,OK,S@483.38,328.62	Kidney_c		This study	Mmu
Zmynd11	MmuEX0053970	162	55	59.74	Liver	SOK,SOK,SOK,B1,S@144.57,97.43	Liver_a		This study	Mmu
Zmynd11	MmuEX0053970	162	55	43.82	Liver	SOK,SOK,SOK,OK,S@158.19,202.81	Liver_b		This study	Mmu
Zmynd11	MmuEX0053970	162	55	58.66	Liver	SOK,SOK,SOK,OK,S@180.09,126.91	Liver_c		This study	Mmu
Zmynd11	MmuEX0053970	162	47	54.47	Lung	SOK,SOK,SOK,OK,C1@319.74,267.26	Lung_a		This study	Mmu
Zmynd11	MmuEX0053970	162	47	46.88	Lung	SOK,SOK,SOK,OK,S@976.04,1105.96	Lung_c		This study	Mmu
Zmynd11	MmuEX0053970	162	47	56.61	Lung	SOK,SOK,SOK,OK,S@449.48,344.52	Lung_d		This study	Mmu
Zmynd11	MmuEX0053970	162	44	52.91	Spleen	SOK,SOK,SOK,OK,S@173.54,154.46	Spleen_a		This study	Mmu
Zmynd11	MmuEX0053970	162	44	35.01	Spleen	SOK,SOK,SOK,OK,S@337.50,626.50	Spleen_b		This study	Mmu
Zmynd11	MmuEX0053970	162	44	56.1	Spleen	SOK,SOK,SOK,OK,S@125.66,98.34	Spleen_c		This study	Mmu
Zmynd11	MmuEX0053970	162	72	52.43	Testis	SOK,SOK,SOK,OK,C1@73.93,67.07	Testis_a		This study	Mmu
Zmynd11	MmuEX0053970	162	72	62.83	Testis	OK,OK,OK,OK,S@57.80,34.20	Testis_b		This study	Mmu
Zmynd11	MmuEX0053970	162	72	66.37	Testis	SOK,SOK,SOK,OK,S@440.03,222.97	Testis_c		This study	Mmu
