# Supplementary material for: An atlas of alternative splicing profiles and functional associations reveals new regulatory programs and genes that simultaneously express multiple major isoforms
Source: HighWire-hosted journal article supplement (doi:10.1101/gr.220962.117), 2017-08-30
Supplement: Supplemental_Table_S4.xlsx [file Supplemental_Table_S4.xlsx]

## Sheet: Human
Supplemental Table S4 – PanAS events for human, mouse and chicken. For each species, all PanAS, SwitchAS and low-frequency AS (LFAS) exons are provided. For each entry, the tables contain: official gene symbol, VastDB event identifier, coordinate of the exon, length of the exon, full set of coordinates of the event as provided by vast-tools, type of AltEx event as provided by vast-tools, number o…
GENE	EVENT_ID	COORDINATE	LENGTH	FullCO	COMPLEX	N_samples	PercAS	AvPSI	MIN	MAX	RANGE	TYPE
PUM2	HsaEX0051288	chr2:20478344-20478580	237	chr2:20482708,20478344-20478580,20463218+20463221	S	108	100	53.68	14.91	87.4	72.49	PanAS
FIP1L1	HsaEX0025813	chr4:54257597-54257665	69	chr4:54257306,54257597-54257665,54265897+54265903	S	108	100	35.3	11.55	77.34	65.79	PanAS
DGUOK	HsaEX0019479	chr2:74184252-74184367	116	chr2:74177859,74184252-74184367,74185246+74185273	C2	108	100	43.45	15.87	77.75	61.88	PanAS
OS9	HsaEX0044853	chr12:58113882-58114046	165	chr12:58112965,58113882-58114046,58114189	S	107	100	46.42	15.26	73.9	58.64	PanAS
ZC3H14	HsaEX0072240	chr14:89068301-89068427	127	chr14:89063152,89068268+89068301-89068427,89073587	C3	107	100	58.11	16.18	89.18	73	PanAS
KTN1	HsaEX0035087	chr14:56130673-56130759	87	chr14:56128330,56130673-56130759,56133959	S	107	100	47.05	13.98	86.36	72.38	PanAS
PCBP2	HsaEX0045775	chr12:53858549-53858636	88	chr12:53856351,53858544+53858549-53858636,53859716	C1	107	100	64.48	31.03	80.32	49.29	PanAS
LSM14A	HsaEX0036841	chr19:34717313-34717369	57	chr19:34712643,34717313-34717369,34718270	S	107	100	36.27	10.32	67.26	56.94	PanAS
BAT3	HsaEX0007679	chr6:31607277-31607423	147	chr6:31607976,31607277-31607423,31607003	S	107	100	62.19	13.83	88.42	74.59	PanAS
MAP4K4	HsaEX0037671	chr2:102487956-102488147	192	chr2:102486877,102487956-102488147,102490109+102490173	S	106	100	37.88	11.47	69.89	58.42	PanAS
FIP1L1	HsaEX0025815	chr4:54306749-54306775	27	chr4:54294350,54306749-54306775,54308820	S	106	100	44.04	11.17	81.21	70.04	PanAS
AZIN1	HsaEX0007410	chr8:103862227-103862372	146	chr8:103870241,103862215+103862227-103862372+103862393,103855957+103855975	S	106	100	25.99	10.58	56.6	46.02	PanAS
RBM6	HsaEX0052758	chr3:50036873-50036946	74	chr3:50000118,50036873-50036946,50085678	C2	106	100	52.58	21.75	87.72	65.97	PanAS
WNK1	HsaEX0071556	chr12:980431-980514	84	chr12:971436,980431-980514,987378+987381+987438	S	106	100	48.68	25.03	69.76	44.73	PanAS
PCM1	HsaEX0045917	chr8:17838100-17838264	165	chr8:17830196,17838100-17838264,17842956	C1	106	100	55.37	13.48	89.4	75.92	PanAS
PMS2	HsaEX0048681	chr7:6043321-6043423	103	chr7:6043603,6043321-6043423,6042267	S	106	100	59.98	12	87.69	75.69	PanAS
GPBP1L1	HsaEX0028135	chr1:46151248-46151292	45	chr1:46152084,46151248-46151292,46126897	C2	106	100	52.13	24.38	81.91	57.53	PanAS
POLR2J2	HsaEX0049073	chr7:102311787-102311789	3	chr7:102311999,102311787-102311789,102309451	MIC	106	100	61.16	17.47	89.45	71.98	PanAS
STAG3L2	HsaEX0062207	chr7:74301137-74301260	124	chr7:74303804,74301137-74301260,74300638	S	105	100	51.83	24.43	88.97	64.54	PanAS
C16orf61	HsaEX0009659	chr16:81014375-81014484	110	chr16:81015411,81014375-81014484+81014488,81010076	C1	105	100	28.75	10.26	58.74	48.48	PanAS
DGUOK	HsaEX0019475	chr2:74166037-74166149	113	chr2:74154179,74166037-74166149,74173846	C1	105	100	30.92	11	64.65	53.65	PanAS
P4HA1	HsaEX0045117	chr10:74804739-74804809	71	chr10:74806683,74804739-74804809,74790128	C3	105	100	40.89	11.16	71.71	60.55	PanAS
RPAIN	HsaEX0055410	chr17:5331391-5331531	141	chr17:5326149,5331391-5331531,5335862	C2	105	100	46.98	15.32	88.7	73.38	PanAS
CCNL1	HsaEX0013664	chr3:156874800-156874872	73	chr3:156876655,156874725+156874800-156874872,156870945	S	105	100	44.17	14.78	81.87	67.09	PanAS
UBTF	HsaEX0069042	chr17:42289712-42289822	111	chr17:42290187,42289712-42289822,42289374	S	104	100	36.37	15.25	71.13	55.88	PanAS
HNRNPR	HsaEX0030306	chr1:23667345-23667510	166	chr1:23670704,23667345-23667510+23667513,23665101	S	104	100	37.54	13.75	70.59	56.84	PanAS
BAT2L	HsaEX0007675	chr9:134369792-134369873	82	chr9:134367647,134369792-134369873,134371127	S	104	100	49.64	19.82	80.29	60.47	PanAS
FAM120AOS	HsaEX0023861	chr9:96210651-96210771	121	chr9:96212761,96210651-96210771,96209979	S	104	100	44.07	26.2	66.53	40.33	PanAS
SPATS2L	HsaEX0061306	chr2:201303845-201304051	207	chr2:201284219,201303845-201304051,201305372	S	104	100	40.51	18.41	79.98	61.57	PanAS
HNRNPAB	HsaEX0030283	chr5:177637133-177637273	141	chr5:177636448,177637133-177637273,177637554	S	104	100	51.08	20.1	79.44	59.34	PanAS
AKR1A1	HsaEX0003462	chr1:46018108-46018235	128	chr1:46016827,46018108-46018235,46027461	S	104	100	23.98	10.63	68.92	58.29	PanAS
DHRS4L2	HsaEX0019540	chr14:24470593-24470726	134	chr14:24470293,24470593-24470726,24473546	C2	104	100	57.94	22.17	87.88	65.71	PanAS
SFRS13A	HsaEX0057652	chr1:24297828-24297929	102	chr1:24298063,24297828-24297929,24294213+24294446	S	104	100	39.56	12.73	84.8	72.07	PanAS
C1orf144	HsaEX0010150	chr1:16717870-16717919	50	chr1:16693803,16717870-16717919,16719726	C2	104	100	28.76	11.48	55.53	44.05	PanAS
FRG1B	HsaEX0026357	chr20:29612879-29613061	183	chr20:29612397,29612879-29613061,29614261	C2	104	100	37.14	14.64	79.49	64.85	PanAS
CKLF	HsaEX0015462	chr16:66592093-66592251	159	chr16:66586696,66592093-66592251,66597025	C1	104	100	56	18.69	88.61	69.92	PanAS
FIP1L1	HsaEX0025812	chr4:54245240-54245284	45	chr4:54244090,54245240-54245284,54245392	S	103	100	43.41	16.23	76.23	60	PanAS
PUF60	HsaEX0051262	chr8:144902836-144902886	51	chr8:144903767,144902836-144902886,144900704	S	103	100	54.04	29.08	75.18	46.1	PanAS
METTL10	HsaEX0038886	chr10:126451045-126451127	83	chr10:126453961,126450869+126451045-126451127,126449072	S	103	100	45.13	17.84	76.47	58.63	PanAS
C14orf153	HsaEX0009421	chr14:104153418-104153548	131	chr14:104145855+104145882,104153418-104153548,104166992	C2	103	100	51.57	17.53	87.34	69.81	PanAS
PI4KA	HsaEX0047294	chr22:21075586-21075706	121	chr22:21087259,21075586-21075706,21073110	C2	103	100	49.75	10.14	87.75	77.61	PanAS
FGFR1OP2	HsaEX0025676	chr12:27113448-27113561	114	chr12:27110676,27113448-27113561,27116275	S	102	100	48.2	12.04	88.11	76.07	PanAS
LETMD1	HsaEX0035661	chr12:51445875-51445990	116	chr12:51442968,51445871+51445875-51445990+51446029,51450133+51450137	C2	102	100	36.4	16.75	63.97	47.22	PanAS
RAPGEF1	HsaEX0052254	chr9:134525516-134525629	114	chr9:134526197,134525516-134525629,134518804	S	102	100	55.69	23.16	89.29	66.13	PanAS
ARMC8	HsaEX0005941	chr3:137907297-137907372	76	chr3:137906441,137907243+137907297-137907372,137928659	C2	102	100	36.66	15.98	71.11	55.13	PanAS
CHTF8	HsaEX0015359	chr16:69154956-69155073	118	chr16:69155339,69154956-69155073+69155087,69154552+69154577	S	102	100	63.56	20.74	87.3	66.56	PanAS
RRBP1	HsaEX0055733	chr20:17660644-17660720	77	chr20:17662673,17660640+17660644-17660720,17641173	S	101	100	43.81	11.26	82.53	71.27	PanAS
STRA13	HsaEX0062599	chr17:79977517-79977570	54	chr17:79977734,79977386+79977517-79977570,79977257	S	101	100	45.04	12.71	86.3	73.59	PanAS
RNH1	HsaEX0054176	chr11:504824-504996	173	chr11:506609,504824-504996,502249	C3	101	100	46.55	13.71	85.26	71.55	PanAS
ZFAND6	HsaEX0072596	chr15:80390758-80390920	163	chr15:80352151,80390758-80390920,80412670	S	101	100	35.74	11.15	75.26	64.11	PanAS
SMEK2	HsaEX0060424	chr2:55805383-55805478	96	chr2:55806815,55805383-55805478,55804492	S	100	100	44.93	17.06	84.62	67.56	PanAS
PML	HsaEX0048646	chr15:74324913-74325056	144	chr15:74317268,74324913-74325056,74325497	S	100	100	59.33	21.57	89.93	68.36	PanAS
SLMAP	HsaEX0060181	chr3:57850534-57850584	51	chr3:57850443,57850534-57850584,57875768+57875773	C2	100	100	61.4	35.8	85.47	49.67	PanAS
CHD2	HsaEX0015049	chr15:93426815-93427008	194	chr15:93426416,93426815-93427008,93428745	S	100	100	32.06	11.53	73.43	61.9	PanAS
FBXW11	HsaEX0025363	chr5:171341347-171341409	63	chr5:171433462,171341347-171341409,171337801	C1	99	100	59.02	26.81	88.1	61.29	PanAS
MED15	HsaEX0038599	chr22:20929400-20929519	120	chr22:20922918,20929400-20929519,20936898+20936946+20936949	S	99	100	43.52	12.36	80.28	67.92	PanAS
HMGCS1	HsaEX0030208	chr5:43307868-43307926	59	chr5:43313458,43307868-43307926,43299077	S	99	100	46.72	23.36	86.67	63.31	PanAS
FAM49B	HsaEX0024495	chr8:130916745-130916831	87	chr8:130951854,130916745-130916831,130915596	C2	99	100	52.81	23.46	86.53	63.07	PanAS
RHOC	HsaEX0053515	chr1:113247722-113247790	69	chr1:113249700,113247675+113247722-113247790,113246428	S	99	100	49.95	20.28	79.27	58.99	PanAS
C11orf67	HsaEX0009046	chr11:77552065-77552106	42	chr11:77532226+77532283+77532287,77552065-77552106+77552270,77553525	S	98	100	34.61	14.8	74.36	59.56	PanAS
RNASEN	HsaEX0053823	chr5:31515561-31515671	111	chr5:31521230,31515561-31515671,31515326	C1	98	100	47.42	13.93	71.02	57.09	PanAS
AGAP3	HsaEX0003039	chr7:150835230-150835400	171	chr7:150831655,150834817+150835230-150835400,150838985	C2	98	100	63.35	13.59	88.57	74.98	PanAS
TMUB2	HsaEX0066126	chr17:42265275-42265377	103	chr17:42265111,42265275-42265377,42266303+42266390	C2	98	100	35.69	13.01	77.68	64.67	PanAS
AP3M1	HsaEX0004971	chr10:75898564-75898685	122	chr10:75910513,75898564-75898685+75898689,75898088+75898140	S	98	100	55.67	29.18	87.5	58.32	PanAS
GLT8D1	HsaEX0027715	chr3:52738740-52738968	229	chr3:52739463,52738740-52738968,52734512	C1	98	100	41.48	14.02	73.97	59.95	PanAS
FNBP4	HsaEX0026132	chr11:47753669-47753771	103	chr11:47754089,47753669-47753771,47753113+47753584	S	97	100	48.74	20.61	82.12	61.51	PanAS
ELK1	HsaEX0022122	chrX:47509320-47509425	106	chrX:47509822,47509320-47509425,47500874	S	97	100	43.42	18.72	72.03	53.31	PanAS
NCOA1	HsaEX0042048	chr2:24990948-24991004	57	chr2:24985645,24990948-24991004,24991090+24991093	S	97	100	58.95	29.08	85.96	56.88	PanAS
ATE1	HsaEX0006485	chr10:123659381-123659509	129	chr10:123661906,123659381-123659509,123629553	C3	97	100	34.9	12.7	63.88	51.18	PanAS
PHF21A	HsaEX0047040	chr11:46112006-46112117	112	chr11:46113734,46112006-46112117+46112132,46105853	S	97	100	36.97	13.53	69.28	55.75	PanAS
USP15	HsaEX0069610	chr12:62743002-62743088	87	chr12:62719714,62743002-62743088,62749112	S	97	100	62.42	33.33	89.28	55.95	PanAS
MTMR14	HsaEX0040596	chr3:9739436-9739550	115	chr3:9731827,9739395+9739400+9739436-9739550,9743474	C2	97	100	49.16	26.13	76.07	49.94	PanAS
C22orf25	HsaEX0010606	chr22:20040960-20041074	115	chr22:20040107,20040883+20040960-20041074,20043466+20043471	C1	97	100	49.18	12.97	78.95	65.98	PanAS
KRIT1	HsaEX0035034	chr7:91873316-91873463	148	chr7:91874216,91873316-91873463,91871451+91871475	C2	96	100	50.98	20	77.5	57.5	PanAS
ZFAND1	HsaEX0072582	chr8:82629484-82629523	40	chr8:82630417,82629484-82629523,82627349	S	96	100	57.81	20.87	84.1	63.23	PanAS
LTBP4	HsaEX0036951	chr19:41122795-41122926	132	chr19:41120352,41122795-41122926+41122948,41125252	C2	95	100	62.88	37.29	85	47.71	PanAS
ATE1	HsaEX0006486	chr10:123658356-123658484	129	chr10:123661906,123658356-123658484,123629553	C3	95	100	62.52	38.8	85.64	46.84	PanAS
MARCH8	HsaEX0037900	chr10:46048560-46048652	93	chr10:46089683,46048560-46048652,46028737	C1	95	100	42.9	15.55	70.68	55.13	PanAS
ZC3H11A	HsaEX0072214	chr1:203765421-203765624	204	chr1:203764922,203765421-203765624,203770703	C1	95	100	37.05	13.28	73.73	60.45	PanAS
SERGEF	HsaEX0057334	chr11:17981017-17981183	167	chr11:18010144,17981017-17981183,17899791	S	95	100	62.79	38.86	85.42	46.56	PanAS
PGPEP1	HsaEX0046849	chr19:18468193-18468425	233	chr19:18466821,18468193-18468425,18474201	S	95	100	71.94	45.04	89.35	44.31	PanAS
DUSP22	HsaEX0021215	chr6:335114-335163	50	chr6:311962,335114-335163,345854	S	94	100	66.72	35.77	89.92	54.15	PanAS
PHF3	HsaEX0047055	chr6:64356524-64356700	177	chr6:64346055,64356432+64356524-64356700,64389901	C1	94	100	45.5	12.08	75.69	63.61	PanAS
JMJD1C	HsaEX0032770	chr10:64979638-64979743	106	chr10:65024411,64979638-64979743,64977091	S	94	100	59.44	30.61	88.89	58.28	PanAS
C17orf95	HsaEX0009842	chr17:74725772-74725859	88	chr17:74723260+74723295+74723420+74723439,74725772-74725859+74725876,74729060	C1	94	100	50.57	13.04	80.28	67.24	PanAS
PILRB	HsaEX0047639	chr7:99951518-99951635	118	chr7:99951106,99951518-99951635,99952766	C2	94	100	58.31	16.92	88.78	71.86	PanAS
PTK2	HsaEX0050838	chr8:141935760-141935848	89	chr8:142011224,141935760-141935848,141900868	C2	94	100	52.33	21.31	88.99	67.68	PanAS
FAM122B	HsaEX0023883	chrX:133923610-133923666	57	chrX:133927833+133927845,133923610-133923666,133923296	S	93	100	35.92	10.32	77.24	66.92	PanAS
PHF15	HsaEX0046971	chr5:133912458-133912586	129	chr5:133909452,133912458-133912586,133914184+133914187	S	93	100	63	13.04	84.67	71.63	PanAS
NEK4	HsaEX0042536	chr3:52783708-52783845	138	chr3:52785948,52783708-52783845,52780920	S	93	100	64.24	29.68	89.67	59.99	PanAS
NT5C2	HsaEX0043990	chr10:104940942-104941085	144	chr10:104952993,104940942-104941085,104934739	S	93	100	50.59	17.67	80.48	62.81	PanAS
YAP1	HsaEX0071941	chr11:102080248-102080295	48	chr11:102076805+102076817,102080248-102080295,102094353	S	92	100	42.94	14.2	82.9	68.7	PanAS
BRD2	HsaEX0008409	chr6:32938528-32938574	47	chr6:32936833,32938528-32938574+32938974+32938979,32939372	S	92	100	46.77	16.48	79.39	62.91	PanAS
TSPAN14	HsaEX0067629	chr10:82228338-82228443	106	chr10:82214127,82228303+82228338-82228443,82248973	C1	92	100	43.8	18.74	78.41	59.67	PanAS
TMUB2	HsaEX0066125	chr17:42265044-42265111	68	chr17:42264477+42264768+42264799,42264985+42265044-42265111,42266303+42266390	C2	92	100	55.25	13.26	83.98	70.72	PanAS
DDR1	HsaEX0018855	chr6:30863181-30863291	111	chr6:30862448,30863181-30863291,30864398+30864508	S	92	100	50.6	23.78	86.5	62.72	PanAS
AC007390.5	HsaEX0000920	chr2:37429006-37429835	830	chr2:37428869,37429006-37429835,37430393	C1	92	100	62.17	35.81	86.86	51.05	PanAS
DCAF11	HsaEX0018597	chr14:24584415-24584502	88	chr14:24584133,24584415-24584502+24584511,24584724+24584752	C3	91	100	50.77	12.53	82.75	70.22	PanAS
DCAF11	HsaEX0018598	chr14:24584591-24584601	11	chr14:24584133,24584591-24584601,24584724+24584752	C3	91	100	61.67	31.53	88.35	56.82	PanAS
SMUG1	HsaEX0060543	chr12:54581603-54581686	84	chr12:54582461+54582505+54582510+54582610+54582651+54582654+54582735,54581603-54581686+54581689,54577743	C1	91	100	41.13	11.09	81.6	70.51	PanAS
PAN3	HsaEX0045350	chr13:28771322-28771483	162	chr13:28752072,28771322-28771483,28794368	C1	91	100	50.96	20.88	81.82	60.94	PanAS
THTPA	HsaEX0064917	chr14:24025952-24026513	562	chr14:24025552,24025952-24026513,24027904	S	91	100	47.13	12.46	88.46	76	PanAS
PCGF5	HsaEX0045879	chr10:93031395-93031454	60	chr10:93024277,93031395-93031454,93038026	S	91	100	64.56	34.13	85.19	51.06	PanAS
NUP62	HsaEX0044382	chr19:50430951-50431105	155	chr19:50432583,50430951-50431105,50413141	S	91	100	50.63	11.48	81.96	70.48	PanAS
ARHGEF11	HsaEX0005610	chr1:156941489-156941608	120	chr1:156946775,156941489-156941608,156939835	S	90	100	56.27	19.6	87.88	68.28	PanAS
EIF1AD	HsaEX0021893	chr11:65769381-65769478	98	chr11:65769511+65769570,65769276+65769381-65769478,65767877+65767947+65767952+65767976	S	90	100	40.32	16.42	83.62	67.2	PanAS
ZNF512	HsaEX0073823	chr2:27806525-27806583	59	chr2:27805995+27806009,27806525-27806583,27820934+27820937+27820940	S	90	100	47.72	17.46	87.1	69.64	PanAS
	HsaEX0000048	chr14:58752309-58752474	166	chr14:58758353,58752309-58752474,58740853	C2	90	100	36.17	13.18	81.68	68.5	PanAS
PILRB	HsaEX0047638	chr7:99950996-99951106	111	chr7:99950893,99950996-99951106,99951518	C2	90	100	73.75	50.65	89.71	39.06	PanAS
FAM189B	HsaEX0024287	chr1:155224191-155224247	57	chr1:155224444,155224191-155224247,155223985	C2	90	100	52.86	20.92	86.41	65.49	PanAS
MIS12	HsaEX0039351	chr17:5391516-5391909	394	chr17:5390004,5391516-5391909,5392143	S	90	100	52.58	12.61	86.08	73.47	PanAS
ARMC10	HsaEX0005893	chr7:102732924-102733100	177	chr7:102727384,102727316+102732924-102733100,102737724	C2	90	100	64.97	36.11	85.14	49.03	PanAS
SH3D19	HsaEX0057982	chr4:152065372-152065440	69	chr4:152069074,152065372-152065440,152065202	S	89	100	34.65	17.44	57.69	40.25	PanAS
ZNF83	HsaEX0074428	chr19:53158814-53158923	110	chr19:53164015,53158814-53158923+53158940,53122315	C2	89	100	61.07	14.99	88.6	73.61	PanAS
OPN3	HsaEX0044778	chr1:241767562-241767881	320	chr1:241803184,241767562-241767881,241761299	C1	89	100	55.7	31.88	75.86	43.98	PanAS
P4HA2	HsaEX0045120	chr5:131533899-131533964	66	chr5:131534572,131533899-131533964,131531173	C3	89	100	26.45	11.39	56.76	45.37	PanAS
NCOR1	HsaEX0042101	chr17:16101915-16102033	119	chr17:16118676,16098959+16101915-16102033,16097953	S	89	100	33.63	12.82	61.68	48.86	PanAS
PHF8	HsaEX0047079	chrX:54020034-54020336	303	chrX:54022126,54020034-54020336,54019272	S	89	100	68.24	25.69	88.32	62.63	PanAS
HMGXB4	HsaEX0030240	chr22:35658316-35658414	99	chr22:35653550,35658316-35658414,35659071	S	88	100	37.94	16.51	63.91	47.4	PanAS
EPB41L1	HsaEX0022639	chr20:34802282-34802362	81	chr20:34800298,34802279+34802282-34802362,34806798+34806801	C1	88	100	56.53	30	84.19	54.19	PanAS
KDM6A	HsaEX0033366	chrX:44919854-44920009	156	chrX:44918711,44919854-44920009,44920569	C2	88	100	52.23	22.92	88.86	65.94	PanAS
TGFBR2	HsaEX0064713	chr3:30664691-30664765	75	chr3:30648085+30648469,30664691-30664765,30686239	S	88	100	26.69	14.14	67.64	53.5	PanAS
PBX3	HsaEX0045758	chr9:128724381-128724493	113	chr9:128723128,128724381-128724493,128725291	S	88	100	50.78	19.52	84.37	64.85	PanAS
TTC3	HsaEX0067906	chr21:38459547-38459701	155	chr21:38445664+38445773+38445783,38459547-38459701,38480692	C3	88	100	62.59	32.62	88.79	56.17	PanAS
DDR1	HsaEX0018852	chr6:30853402-30853457	56	chr6:30852487,30853402-30853457,30856465	S	88	100	47.15	15.15	83.23	68.08	PanAS
THUMPD2	HsaEX0064924	chr2:39984388-39984508	121	chr2:39988471,39984388-39984508,39983100	S	87	100	49.64	16	89.47	73.47	PanAS
RBMX	HsaEX0052801	chrX:135955405-135955547	143	chrX:135957245,135955405-135955547,135954504	S	87	100	52.98	17.79	85.69	67.9	PanAS
C9orf3	HsaEX0011654	chr9:97844857-97845001	145	chr9:97843062,97844857-97845001,97848964	S	87	100	59.44	15.87	88.89	73.02	PanAS
GANC	HsaEX0027001	chr15:42573115-42573331	217	chr15:42570788,42573115-42573331,42575809	C2	87	100	44.15	18	87.76	69.76	PanAS
TP53INP1	HsaEX0066607	chr8:95944298-95944335	38	chr8:95952088,95944298-95944335,95942956	S	86	100	56.25	25.78	89.18	63.4	PanAS
DHRS12	HsaEX0019518	chr13:52371962-52372044	83	chr13:52373670,52371962-52372044,52365393	S	86	100	52.04	18.18	89.13	70.95	PanAS
GRB10	HsaEX0028562	chr7:50799969-50800065	97	chr7:50823584,50799969-50800065,50771605	C2	86	100	48.04	16.63	80.86	64.23	PanAS
ZBTB8OS	HsaEX0072211	chr1:33097428-33097476	49	chr1:33097809,33097428-33097476+33097480,33093145+33093466	C2	86	100	43.94	18.92	89.21	70.29	PanAS
AC108488.3	HsaEX0001558	chr2:3607038-3607319	282	chr2:3606340+3606588,3606994+3607038-3607319,3608907	S	86	100	48.99	12.9	88.41	75.51	PanAS
CDC14B	HsaEX0013985	chr9:99277931-99278074	144	chr9:99284788,99277931-99278074,99272071	C2	86	100	39.27	10.87	87.16	76.29	PanAS
CLCC1	HsaEX0015509	chr1:109504931-109505091	161	chr1:109505983,109504931-109505091,109493070	C1	86	100	40.47	12.73	80.71	67.98	PanAS
USP21	HsaEX0069640	chr1:161130156-161130296	141	chr1:161129468,161130156-161130296,161130410	S	86	100	43.27	10.76	89.17	78.41	PanAS
SOCS4	HsaEX0060939	chr14:55498581-55498709	129	chr14:55494189,55498581-55498709,55509670	S	86	100	30.09	10	66.67	56.67	PanAS
RIC8B	HsaEX0053570	chr12:107264601-107264720	120	chr12:107254190,107264601-107264720,107279682	C1	85	100	48.09	17.98	73.54	55.56	PanAS
CPEB4	HsaEX0016975	chr5:173359453-173359503	51	chr5:173337607,173359453-173359503,173371970	C1	85	100	49	30.51	82.78	52.27	PanAS
NAA16	HsaEX0041462	chr13:41936867-41937009	143	chr13:41936295,41936867-41937009,41941575	S	85	100	50.74	18.13	87.8	69.67	PanAS
NME6	HsaEX0043160	chr3:48337609-48337648	40	chr3:48338217,48337609-48337648,48336725	S	85	100	66.52	25.44	83.76	58.32	PanAS
DHX34	HsaEX0019603	chr19:47880172-47880246	75	chr19:47879817,47880172-47880246,47880357	S	84	100	47.31	10.64	86	75.36	PanAS
TPD52L1	HsaEX0066662	chr6:125578244-125578304	61	chr6:125569529,125578244-125578304+125578326,125583980	C2	84	100	36.63	11.02	85.97	74.95	PanAS
ELMOD3	HsaEX0022177	chr2:85582199-85582293	95	chr2:85581952,85582199-85582293,85582678	C1	84	100	57.68	24.14	84.81	60.67	PanAS
MTERFD2	HsaEX0040442	chr2:242035808-242035853	46	chr2:242036658,242035808-242035853,242033844+242033847	C1	84	100	62.13	29.68	86.19	56.51	PanAS
EPS15L1	HsaEX0022867	chr19:16487933-16488065	133	chr19:16495940,16487933-16488065,16466662	C2	84	100	50.71	16.67	89.64	72.97	PanAS
MYST3	HsaEX0041381	chr8:41907138-41907225	88	chr8:41909419,41907094+41907138-41907225,41906820	S	83	100	37.86	10.1	82.76	72.66	PanAS
CEP164	HsaEX0014715	chr11:117234145-117234222	78	chr11:117233254,117234145-117234222,117241796	S	83	100	47.1	13.25	89.44	76.19	PanAS
ZNF266	HsaEX0073292	chr19:9544786-9544911	126	chr19:9545784,9544741+9544751+9544786-9544911,9530894	C3	83	100	53.48	26.09	83.91	57.82	PanAS
NDRG2	HsaEX0042230	chr14:21492189-21492255	67	chr14:21493188,21492189-21492255,21491480	C2	83	100	59.64	21.94	87.56	65.62	PanAS
TFPI	HsaEX0064663	chr2:188394091-188394212	122	chr2:188418927,188394091-188394212,188368497	C1	82	100	27.56	13.21	72.73	59.52	PanAS
GABPB2	HsaEX0026779	chr1:151076038-151076151	114	chr1:151070478,151076038-151076151,151079513	S	82	100	59.72	24.5	88.37	63.87	PanAS
LRRC23	HsaEX0036545	chr12:7015009-7015118	110	chr12:7014923,7015009-7015118,7015573	S	82	100	38.48	12	80.39	68.39	PanAS
KIAA0556	HsaEX0033709	chr16:27665929-27666057	129	chr16:27660056,27665929-27666057,27689050	C1	81	100	47.84	18.13	87.23	69.1	PanAS
TNRC6B	HsaEX0066392	chr22:40666126-40666284	159	chr22:40663040,40666126-40666284,40669429	S	81	100	38.72	13.01	73.08	60.07	PanAS
CTDSPL	HsaEX0017812	chr3:37998602-37998634	33	chr3:37988702,37998602-37998634,38006062	S	81	100	57.44	23.43	78.6	55.17	PanAS
PBRM1	HsaEX0045745	chr3:52716108-52716249	142	chr3:52719765,52716108-52716249,52713739+52713742	C1	81	100	48.48	11.76	77.23	65.47	PanAS
PIGN	HsaEX0047441	chr18:59830764-59830889	126	chr18:59854077+59854256,59830764-59830889,59828459+59828618	C2	81	100	42.67	13.62	85.7	72.08	PanAS
SCMH1	HsaEX0056510	chr1:41625397-41625605	209	chr1:41626547,41625397-41625605,41618413	C3	81	100	52.79	13	82.85	69.85	PanAS
CNOT4	HsaEX0016034	chr7:135048606-135048818	213	chr7:135078670,135048606-135048818,135047938	S	81	100	47.61	13.13	75	61.87	PanAS
CCDC45	HsaEX0013269	chr17:62512841-62512946	106	chr17:62510476,62512841-62512946,62515439	S	81	100	57.02	19.41	85.73	66.32	PanAS
DNAJB4	HsaEX0020252	chr1:78470764-78471005	242	chr1:78444977+78445303,78470764-78471005,78478735	S	79	100	55.67	18.18	88.34	70.16	PanAS
SFI1	HsaEX0057589	chr22:31927044-31927115	72	chr22:31924849,31927044-31927115,31942847	C1	79	100	39.97	10.39	75.19	64.8	PanAS
HUWE1	HsaEX0030735	chrX:53711125-53711264	140	chrX:53713111+53713215,53710819+53711125-53711264,53707139	S	78	100	45.48	11.98	71.96	59.98	PanAS
NFAT5	HsaEX0042682	chr16:69680420-69680481	62	chr16:69660431,69680420-69680481,69680931	S	78	100	44.75	10.64	89.04	78.4	PanAS
C22orf13	HsaEX0010596	chr22:24950917-24951104	188	chr22:24951583,24950917-24951104,24944969	C1	78	100	46.69	10.25	85.37	75.12	PanAS
MYEF2	HsaEX0040942	chr15:48443297-48443368	72	chr15:48443670,48443297-48443368,48441568	S	77	100	37.68	14.89	89.09	74.2	PanAS
MIOS	HsaEX0039312	chr7:7607238-7607319	82	chr7:7606703+7607115,7607238-7607319,7612067	C3	77	100	42.58	18.13	82.02	63.89	PanAS
AC005840.2	HsaEX0000882	chr12:6560059-6560146	88	chr12:6560529+6560635,6560036+6560059-6560146+6560152,6557903+6557923	S	77	100	44.93	13.55	76.55	63	PanAS
IGF2BP2	HsaEX0031140	chr3:185390329-185390399	71	chr3:185393084,185390329-185390399+185390457,185376197	S	76	100	55.15	24.45	87.44	62.99	PanAS
MTHFSD	HsaEX0040515	chr16:86585785-86585898	114	chr16:86588251,86585785-86585898,86582183	C3	76	100	44.78	13.51	74.71	61.2	PanAS
IL17RC	HsaEX0031366	chr3:9974504-9974542	39	chr3:9974387,9974504-9974542,9974637	S	75	100	55.66	24.98	81.4	56.42	PanAS
MTHFSD	HsaEX0040516	chr16:86585639-86585752	114	chr16:86588251,86585579+86585639-86585752,86582183	C3	75	100	49.95	29.03	78.79	49.76	PanAS
CELF1	HsaEX0014515	chr11:47522413-47522457	45	chr11:47528410,47522413-47522457+47522484,47510576	C3	75	100	56.44	19.01	88.78	69.77	PanAS
AC138035.1	HsaEX0001637	chr5:180743709-180743765	57	chr5:180740953,180743709-180743765,180744332	S	74	100	31.6	10.45	79.75	69.3	PanAS
MGAT5	HsaEX0039095	chr2:135010666-135010789	124	chr2:134877862,135010666-135010789,135011833	C2	74	100	49.73	15.08	83.89	68.81	PanAS
PARP11	HsaEX0045567	chr12:3973002-3973123	122	chr12:3982378,3973002-3973123,3939184	S	73	100	53.88	15.25	89.19	73.94	PanAS
SIPA1L1	HsaEX0058389	chr14:71880665-71880731	67	chr14:71787898,71880665-71880731,71979460	C3	73	100	45.88	10.53	85.19	74.66	PanAS
ARMCX5	HsaEX0005975	chrX:101856808-101856905	98	chrX:101856437,101856808-101856905,101860410	C1	73	100	52.59	10.8	88.53	77.73	PanAS
C11orf74	HsaEX0009063	chr11:36657601-36657667	67	chr11:36631789,36657601-36657667,36669566	C1	73	100	58.9	31.82	87.5	55.68	PanAS
ADARB1	HsaEX0002624	chr21:46554630-46554747	118	chr21:46548488,46554630-46554747,46591525	C1	73	100	45.06	22	85.59	63.59	PanAS
MDC1	HsaEX0038349	chr6:30675343-30676134	792	chr6:30679189,30675343-30676134,30675231	S	72	100	53.05	14.29	83.52	69.23	PanAS
ZNF558	HsaEX0073928	chr19:8941446-8941567	122	chr19:8941994,8941446-8941567,8935784	S	72	100	32.13	12.82	54.01	41.19	PanAS
RFWD3	HsaEX0053231	chr16:74698588-74698643	56	chr16:74700684+74700740,74698522+74698588-74698643,74695349	S	72	100	44.74	20.86	70.27	49.41	PanAS
TTLL11	HsaEX0068062	chr9:124794002-124794135	134	chr9:124801551,124794002-124794135,124752049	S	72	100	44.58	16.67	73.18	56.51	PanAS
IRAK4	HsaEX0032206	chr12:44165023-44165168	146	chr12:44162075,44165023-44165168,44165983	C1	72	100	57.05	19.54	88.59	69.05	PanAS
DLEU1	HsaEX0019856	chr13:50657278-50657330	53	chr13:50656693,50657278-50657330,50678840	S	72	100	45.04	23.34	71.93	48.59	PanAS
DOPEY1	HsaEX0020722	chr6:83806450-83806542	93	chr6:83777498,83806450-83806542,83806644	S	71	100	48.99	10.54	81.7	71.16	PanAS
RPL23AP53	HsaEX0055498	chr8:180804-180905	102	chr8:182129,180804-180905,169417	C1	71	100	52.27	15.48	88.61	73.13	PanAS
PRR3	HsaEX0050431	chr6:30525927-30525989	63	chr6:30525227,30525927-30525989,30529105	C2	71	100	44.55	11.39	71.76	60.37	PanAS
PLEKHA4	HsaEX0048235	chr19:49342462-49342520	59	chr19:49344406,49342462-49342520,49341386	S	69	100	63.28	26.83	83.95	57.12	PanAS
C10orf18	HsaEX0008808	chr10:5751493-5751626	134	chr10:5727138,5751493-5751626,5754786	C2	69	100	55.73	24.39	86.67	62.28	PanAS
NPL	HsaEX0043581	chr1:182791250-182791334	85	chr1:182787994,182791250-182791334,182794916	C1	68	100	70.91	44.5	84.15	39.65	PanAS
N4BP2L1	HsaEX0041431	chr13:32978458-32978534	77	chr13:32980901+32981387,32978458-32978534,32977337	C3	68	100	63.6	10.57	89.09	78.52	PanAS
TLN2	HsaEX0065145	chr15:62910550-62910674	125	chr15:62881961,62910550-62910674,62939474	S	67	100	45.03	17.95	82.38	64.43	PanAS
HDAC9	HsaEX0029457	chr7:18668973-18669104	132	chr7:18633612+18633652,18668973-18669104,18674250	S	67	100	56.8	20	84.31	64.31	PanAS
C16orf67	HsaEX0009678	chr16:31712984-31713179	196	chr16:31712059,31712984-31713179,31713856	C2	67	100	32.23	11.27	54.37	43.1	PanAS
DET1	HsaEX0019311	chr15:89079543-89079612	70	chr15:89089771,89079543-89079612,89074946	C3	67	100	27.66	12.82	46.22	33.4	PanAS
KIAA1609	HsaEX0034201	chr16:84536327-84536448	122	chr16:84538207,84536327-84536448+84536468,84531717	C1	67	100	44.88	11.11	83.67	72.56	PanAS
SLC25A19	HsaEX0059020	chr17:73284469-73284542	74	chr17:73285091+73285170+73285435,73284469-73284542,73282883	C2	66	100	40.08	13.49	89.19	75.7	PanAS
CCDC41	HsaEX0013248	chr12:94829051-94829103	53	chr12:94853333,94829051-94829103,94806367	S	66	100	30.04	14.81	51.26	36.45	PanAS
AC069513.3	HsaEX0001304	chr3:195425901-195426078	178	chr3:195423460,195425901-195426078+195426142,195435005+195435009	C3	66	100	58.05	15.48	87.01	71.53	PanAS
TTC23	HsaEX0067855	chr15:99781570-99781764	195	chr15:99785594,99781570-99781764,99768934+99768937	C2	65	100	60.84	41.09	87.88	46.79	PanAS
IL15RA	HsaEX0031328	chr10:6005706-6005801	96	chr10:6008104+6008108,6005706-6005801+6005804,6002431+6002530	C1	65	100	55.8	16.88	86.11	69.23	PanAS
RP11-534G20.3	HsaEX0054985	chr10:29709420-29709590	171	chr10:29704341,29709394+29709420-29709590+29709702,29771762	C1	65	100	59.49	33.38	84.42	51.04	PanAS
PTPN3	HsaEX0051028	chr9:112184998-112185132	135	chr9:112189230,112184998-112185132,112182880	S	64	100	51.08	10.77	86.05	75.28	PanAS
TTC23	HsaEX0067854	chr15:99785594-99785715	122	chr15:99789376+99789622+99789827,99785594-99785715,99768934+99768937	C2	64	100	50.33	20.76	87.82	67.06	PanAS
PLEKHA6	HsaEX0048269	chr1:204225930-204226016	87	chr1:204226481,204225930-204226016,204219742	C1	64	100	41.88	14.15	82.28	68.13	PanAS
ZNF721	HsaEX0074266	chr4:429559-429668	110	chr4:431235,429559-429668,420762	C2	64	100	60.66	37.01	85.99	48.98	PanAS
AGAP10	HsaEX0003025	chr10:47229028-47229156	129	chr10:47232156,47229028-47229156,47220922	C1	64	100	37.49	11	69.99	58.99	PanAS
ZNF383	HsaEX0073541	chr19:37715720-37715841	122	chr19:37709176+37709231,37715720-37715841,37721311	C2	63	100	61.5	23.63	85.67	62.04	PanAS
KIAA0240	HsaEX0033530	chr6:42778044-42778139	96	chr6:42749839,42778044-42778139,42789756	S	62	100	42.02	15.79	72.8	57.01	PanAS
AC055839.1	HsaEX0001260	chr17:5418793-5418837	45	chr17:5421066,5418793-5418837,5405192	C2	62	100	49.93	11.34	83.78	72.44	PanAS
ZNF584	HsaEX0073995	chr19:58921373-58921458	86	chr19:58920532+58920573,58921308+58921332+58921373-58921458,58926891	S	61	100	60.07	10.14	89.66	79.52	PanAS
ZNF165	HsaEX0073094	chr6:28239800-28240116	317	chr6:28239712,28239800-28240116,28240447	S	61	100	45.38	16.36	78.95	62.59	PanAS
SLC10A7	HsaEX0058551	chr4:147177978-147178088	111	chr4:147179844,147177978-147178088,147177672	S	60	100	34.41	10.53	60.71	50.18	PanAS
B3GALNT2	HsaEX0007419	chr1:235659496-235659618	123	chr1:235667441,235659496-235659618,235658138	S	60	100	28.76	13.02	50.15	37.13	PanAS
PPARA	HsaEX0049279	chr22:46572650-46572733	84	chr22:46547873,46572650-46572733,46594239+46594242	C1	60	100	59.92	28	84.92	56.92	PanAS
C17orf95	HsaEX0009841	chr17:74723052-74723260	209	chr17:74722961,74723052-74723260+74723295+74723420+74723439,74729060	C2	59	100	63.67	27.1	87.4	60.3	PanAS
ZNF678	HsaEX0074170	chr1:227838657-227838777	121	chr1:227834371,227838657-227838777,227842037	C1	59	100	46.89	11.11	81.82	70.71	PanAS
RBM12B	HsaEX0052618	chr8:94752857-94752924	68	chr8:94753109,94752857-94752924,94749583	C1	59	100	51.47	28.58	85.3	56.72	PanAS
SH2D4A	HsaEX0057930	chr8:19214714-19214794	81	chr8:19192368,19214714-19214794,19218714	S	58	100	47.04	13.55	71.77	58.22	PanAS
ZBTB20	HsaEX0072108	chr3:114099624-114099787	164	chr3:114107852,114099624-114099787,114099251	C1	58	100	41.63	12.33	70.53	58.2	PanAS
TMEM116	HsaEX0065399	chr12:112441604-112441659	56	chr12:112443061,112441604-112441659+112441667,112429693	C1	58	100	50.03	16.19	81.4	65.21	PanAS
MCM9	HsaEX0038278	chr6:119253772-119253905	134	chr6:119256056,119253772-119253905,119252903	S	58	100	41.35	12.31	83.32	71.01	PanAS
PHB	HsaEX0046901	chr17:47491604-47491695	92	chr17:47492102,47491604-47491695,47490653	C2	58	100	50.52	19.04	83.71	64.67	PanAS
AC136007.2	HsaEX0001624	chr2:70259265-70259387	123	chr2:70278335,70259265-70259387,70224020	C2	57	100	44.39	10.35	80.41	70.06	PanAS
C11orf61	HsaEX0009022	chr11:124648946-124649035	90	chr11:124669767+124670214,124648900+124648946-124649035,124644714+124644727+124644870	S	56	100	39.73	10.61	78.23	67.62	PanAS
REV3L	HsaEX0053135	chr6:111793216-111793343	128	chr6:111803953,111793216-111793343,111737675	S	55	100	47.94	11.73	73.71	61.98	PanAS
ATXN1	HsaEX0007245	chr6:16753464-16753578	115	chr6:16754274,16753464-16753578,16658132	C2	55	100	59.72	35.14	87.06	51.92	PanAS
PGF	HsaEX0046818	chr14:75412916-75412978	63	chr14:75413082,75412916-75412978,75409436	S	54	100	45.17	13.01	89.2	76.19	PanAS
XRRA1	HsaEX0071899	chr11:74574026-74574066	41	chr11:74617284,74574026-74574066,74563127	C3	54	100	43	12.52	89.52	77	PanAS
AL031768.1	HsaEX0003504	chr6:2269932-2270033	102	chr6:2263918,2269932-2270033,2398811	C3	54	100	44.88	23.81	68.69	44.88	PanAS
KIAA0586	HsaEX0033754	chr14:58894956-58895181	226	chr14:58894355+58894531+58894575,58894956-58895181,58896081	S	53	100	45.91	18.1	73.21	55.11	PanAS
XRRA1	HsaEX0071890	chr11:74554899-74555004	106	chr11:74555213,74554899-74555004,74554498	S	53	100	52.33	23.81	88	64.19	PanAS
PIP5K1B	HsaEX0047687	chr9:71357417-71357573	157	chr9:71320673+71320678,71357417-71357573,71433377	S	53	100	48.57	10.53	82	71.47	PanAS
THRB	HsaEX0064894	chr3:24338717-24338814	98	chr3:24378791,24338717-24338814+24338862,24270492	C1	53	100	34.71	13.04	60.48	47.44	PanAS
RP4-717I23.3	HsaEX0055302	chr1:93802934-93803040	107	chr1:93804914+93805033,93802934-93803040+93803069,93791452	C3	53	100	49.85	10.91	83.35	72.44	PanAS
AC092296.1	HsaEX0001398	chr19:36813032-36813127	96	chr19:36821155,36813032-36813127+36813286,36812932	S	53	100	46.76	17.21	85.37	68.16	PanAS
C17orf65	HsaEX0009799	chr17:42260298-42260461	164	chr17:42263933,42260298-42260461,42259088	S	53	100	51.49	19.3	88.16	68.86	PanAS
CCDC57	HsaEX0013322	chr17:80165736-80165924	189	chr17:80170661,80165607+80165723+80165736-80165924,80159828	S	52	100	33.5	13.62	64.71	51.09	PanAS
ZNF185	HsaEX0073128	chrX:152091264-152091353	90	chrX:152090800,152091264-152091353,152100216	C2	52	100	46.91	22.59	85.83	63.24	PanAS
ZNF567	HsaEX0073955	chr19:37185704-37185778	75	chr19:37180399,37185704-37185778,37203288	S	52	100	53.7	11.76	76.19	64.43	PanAS
MPHOSPH9	HsaEX0039921	chr12:123712010-123712119	110	chr12:123714808,123712010-123712119+123712163,123707674	S	52	100	61.91	35.3	85.05	49.75	PanAS
TRIM16	HsaEX0067031	chr17:15548040-15548260	221	chr17:15580490,15548040-15548260,15546130	C1	52	100	35.78	12.16	82.69	70.53	PanAS
ERG	HsaEX0023045	chr21:39772496-39772567	72	chr21:39774479,39772496-39772567,39764366	S	51	100	51.78	26.83	87.69	60.86	PanAS
XRRA1	HsaEX0071901	chr11:74563034-74563127	94	chr11:74617284,74563034-74563127,74559507	C3	51	100	58.4	31.02	89.23	58.21	PanAS
ITGB1BP1	HsaEX0032436	chr2:9562608-9562789	182	chr2:9562931,9562608-9562789,9560229	C3	51	100	61.66	29.73	86.89	57.16	PanAS
XXbac-BPG246D15.8	HsaEX0071909	chr6:32812587-32812647	61	chr6:32812051,32812347+32812422+32812587-32812647,32813107+32813195	S	50	100	33.98	11.11	65.38	54.27	PanAS
SLC24A1	HsaEX0058940	chr15:65930466-65930519	54	chr15:65918308,65930466-65930519,65931933	C1	50	100	25.83	10.14	46.51	36.37	PanAS
RNF24	HsaEX0054097	chr20:3954979-3955047	69	chr20:3995792+3995848+3996084,3954979-3955047,3944671	S	50	100	41.05	11.23	84.33	73.1	PanAS
ZNF432	HsaEX0073668	chr19:52510546-52510583	38	chr19:52511394,52510546-52510583,52507153	S	50	100	32.35	10.83	70.66	59.83	PanAS
ESRP1	HsaEX0023206	chr8:95709080-95709189	110	chr8:95705055,95709080-95709189,95718153	C1	49	100	59.25	24.79	82.28	57.49	PanAS
DZIP1L	HsaEX0021388	chr3:137790485-137790677	193	chr3:137796341,137790485-137790677,137787209	S	49	100	51.65	25.49	75.86	50.37	PanAS
ST5	HsaEX0062015	chr11:8752670-8752756	87	chr11:8772168,8752670-8752756,8747756	C1	49	100	64.56	17.01	86.55	69.54	PanAS
THAP6	HsaEX0064773	chr4:76452640-76452808	169	chr4:76447071,76452170+76452640-76452808,76465069	C2	49	100	45.92	14.49	86.57	72.08	PanAS
TRPS1	HsaEX0067436	chr8:116635828-116635985	158	chr8:116680772,116635828-116635985,116632287	C1	48	100	46.83	16.58	85.77	69.19	PanAS
ZNF434	HsaEX0073675	chr16:3440010-3440183	174	chr16:3440423,3440010-3440183,3434941	C2	48	100	48.18	20.41	77.46	57.05	PanAS
TMEM164	HsaEX0065557	chrX:109247114-109247392	279	chrX:109246000,109247111+109247114-109247392,109310575	C1	47	100	58.58	23.81	80.99	57.18	PanAS
AC136007.2	HsaEX0001614	chr2:70245147-70245263	117	chr2:70278335,70245147-70245263,70224020	C1	47	100	40.39	15.95	67.1	51.15	PanAS
C8orf44	HsaEX0011545	chr8:67589877-67590189	313	chr8:67579936,67589877-67590189,67591956	C2	47	100	40.27	13.98	89.19	75.21	PanAS
PRRX1	HsaEX0050469	chr1:170699418-170699489	72	chr1:170695542,170699418-170699489,170705189	S	47	100	57.88	15.05	82	66.95	PanAS
GATS	HsaEX0027122	chr7:99809017-99809617	601	chr7:99810670,99809017-99809617,99800226	C2	47	100	38.18	10.64	69.11	58.47	PanAS
GXYLT1	HsaEX0029128	chr12:42523561-42523653	93	chr12:42538228,42523561-42523653,42512973	S	46	100	46.53	24.68	80.44	55.76	PanAS
MED15	HsaEX0038598	chr22:20909364-20909435	72	chr22:20909282,20909364-20909435,20918737+20918742	C1	46	100	73.06	15.19	86.97	71.78	PanAS
SYTL3	HsaEX0063320	chr6:159139119-159139243	125	chr6:159134910,159139119-159139243,159146535+159146538	C1	46	100	68.95	29.91	89.42	59.51	PanAS
SLC7A2	HsaEX0059973	chr8:17359769-17359811	43	chr8:17354746,17359766+17359769-17359811,17400827	S	45	100	57.17	15	86.21	71.21	PanAS
MECOM	HsaEX0038487	chr3:168825714-168825740	27	chr3:168830575,168825714-168825740,168820014	S	44	100	40.63	12.3	61.17	48.87	PanAS
ZBTB25	HsaEX0072132	chr14:64966159-64966281	123	chr14:64969287+64969371,64966159-64966281,64957258	C2	44	100	38.8	13.25	71.46	58.21	PanAS
DNAL1	HsaEX0020377	chr14:74119873-74119918	46	chr14:74111745,74119873-74119918,74121550	C1	44	100	32.17	11.82	75.63	63.81	PanAS
DAG1	HsaEX0018456	chr3:49526131-49526178	48	chr3:49524848,49526059+49526131-49526178,49547852	C3	44	100	46.43	16.67	85.71	69.04	PanAS
AC008083.1	HsaEX0000956	chr12:47604423-47604540	118	chr12:47609948,47604423-47604540+47604544,47603241+47603265	C2	44	100	69.8	32.51	85.63	53.12	PanAS
GPCPD1	HsaEX0028160	chr20:5566840-5566915	76	chr20:5572484,5566840-5566915+5572532,5564968	C1	44	100	57.01	15.4	87.79	72.39	PanAS
THSD1	HsaEX0064899	chr13:52960163-52960321	159	chr13:52971367,52960163-52960321,52952924	S	44	100	45.59	12.82	70.83	58.01	PanAS
MYLK	HsaEX0041000	chr3:123451743-123451949	207	chr3:123452534,123451743-123451949,123444925	S	43	100	60.01	27.14	86.36	59.22	PanAS
HMCN1	HsaEX0030180	chr1:186147548-186147898	351	chr1:186143774,186147548-186147898,186151300	S	43	100	37.98	20.36	71.27	50.91	PanAS
ABI3BP	HsaEX0000702	chr3:100582846-100582920	75	chr3:100583677,100582846-100582920,100581229	C2	43	100	36.37	11.19	88.34	77.15	PanAS
DLEU2	HsaEX0019862	chr13:50603414-50603628	215	chr13:50618787,50603414-50603628,50601542	C1	43	100	48.58	11.13	89.74	78.61	PanAS
AC093415.2	HsaEX0001422	chr3:37860301-37860421	121	chr3:37862505,37860301-37860421,37850371	C1	43	100	42.55	11.43	72.73	61.3	PanAS
CREB3L4	HsaEX0017179	chr1:153940484-153940640	157	chr1:153940238+153940360,153940484-153940640+153940660,153940998+153941001	S	42	100	54.99	14.29	87.77	73.48	PanAS
NUCB2	HsaEX0044139	chr11:17358895-17359081	187	chr11:17356027,17358507+17358895-17359081,17370892	C2	42	100	59.43	17.14	89.19	72.05	PanAS
ZNF852	HsaEX0074462	chr3:44544457-44544548	92	chr3:44551983+44552045,44544457-44544548,44544160	C1	42	100	32.42	10.11	65.44	55.33	PanAS
IL10RA	HsaEX0031282	chr11:117857399-117857528	130	chr11:117857249,117857399-117857528,117859097	S	41	100	34.12	10.71	71.01	60.3	PanAS
AC093734.11	HsaEX0001435	chr7:1618923-1619040	118	chr7:1615524,1618923-1619040,1622798	C2	41	100	32.69	11.86	56.64	44.78	PanAS
AC093415.2	HsaEX0001419	chr3:37892915-37892983	69	chr3:37903192,37892915-37892983,37876258	C1	41	100	32	11.9	54.55	42.65	PanAS
MESDC2	HsaEX0038849	chr15:81262803-81263000	198	chr15:81281920,81262803-81263000,81244637	C2	40	100	51.56	10	84.31	74.31	PanAS
ZNF776	HsaEX0074342	chr19:58264659-58264747	89	chr19:58262279,58264659-58264747+58267059,58268240	S	40	100	64.85	33.66	89.61	55.95	PanAS
LONRF3	HsaEX0036135	chrX:118116784-118116906	123	chrX:118112426,118116784-118116906,118123371	C1	39	100	55.44	25.77	80.49	54.72	PanAS
AC132812.1	HsaEX0001604	chr17:62747357-62747445	89	chr17:62747925,62747357-62747445+62747719,62747266	C1	39	100	55.57	22.03	81	58.97	PanAS
ZNF662	HsaEX0074142	chr3:42954693-42954794	102	chr3:42950401,42954693-42954794,42955819	C1	39	100	42.32	19.1	72.63	53.53	PanAS
SERPINA5	HsaEX0057378	chr14:95047952-95048047	96	chr14:95047827,95047952-95048047,95053683	S	39	100	27.51	10.2	47.11	36.91	PanAS
CACNA1H	HsaEX0011991	chr16:1262511-1262528	18	chr16:1262138+1262171,1262511-1262528,1263780	S	38	100	59.1	19.65	84.57	64.92	PanAS
MRVI1	HsaEX0040240	chr11:10673572-10673729	158	chr11:10709056,10673572-10673729,10655618	C2	38	100	47.91	16.73	89.57	72.84	PanAS
KLRG1	HsaEX0034927	chr12:9147715-9147884	170	chr12:9144906,9147715-9147884,9161571	S	38	100	57.01	24	87.61	63.61	PanAS
ZNF135	HsaEX0073035	chr19:58571342-58571403	62	chr19:58570678,58571337+58571342-58571403+58571766,58572948	S	38	100	39.54	12.5	85.57	73.07	PanAS
AL031768.1	HsaEX0003508	chr6:2397455-2397860	406	chr6:2263918,2397455-2397860,2398811	C2	38	100	44.28	11.76	78.62	66.86	PanAS
CMKLR1	HsaEX0015865	chr12:108723772-108723984	213	chr12:108732804,108723772-108723984,108687441	S	37	100	61.33	43.04	86.67	43.63	PanAS
AC006465.3	HsaEX0000892	chr7:7916912-7917126	215	chr7:7841374,7916912-7917126,8007330	C1	37	100	59.94	23.86	83.6	59.74	PanAS
LAT2	HsaEX0035459	chr7:73629152-73629247	96	chr7:73624418,73629152-73629247+73629270+73629340+73629429,73630277	S	36	100	52.49	26.43	82.03	55.6	PanAS
TCF19	HsaEX0064154	chr6:31126674-31126812	139	chr6:31126499,31126674-31126812,31126920	S	36	100	52.65	25	84.62	59.62	PanAS
NFATC2	HsaEX0042701	chr20:50015180-50015267	88	chr20:50048604,50015180-50015267,50007988	S	36	100	63.3	38	89.19	51.19	PanAS
RANBP17	HsaEX0052151	chr5:170455876-170455993	118	chr5:170395381,170455876-170455993,170597134	C1	36	100	52.05	21.74	85.71	63.97	PanAS
COX11	HsaEX0016896	chr17:53031022-53031120	99	chr17:53038480,53031022-53031120,53029473	C1	36	100	27.94	11.15	66.67	55.52	PanAS
PPT2	HsaEX0049845	chr6:32121776-32122181	406	chr6:32121413,32121776-32122181,32122364	S	36	100	55.22	11.24	84.52	73.28	PanAS
APOBEC3D	HsaEX0005156	chr22:39421075-39421354	280	chr22:39419019,39421075-39421354+39425524,39421562	C2	36	100	53.19	19.07	78.22	59.15	PanAS
LRMP	HsaEX0036393	chr12:25214526-25214587	62	chr12:25205890,25214526-25214587,25215754	C1	35	100	34.29	11.11	63.64	52.53	PanAS
C19orf46	HsaEX0009982	chr19:36499119-36499269	151	chr19:36499456,36499119-36499269,36498170	C2	35	100	49.87	15	77.33	62.33	PanAS
KIAA1671	HsaEX0034228	chr22:25410401-25410533	133	chr22:25348739,25410397+25410401-25410533,25421600	C1	35	100	53.63	20.93	85.09	64.16	PanAS
SUGT1L1	HsaEX0062851	chr13:41495610-41495667	58	chr13:41495755,41495610-41495667,41482348	C1	35	100	40.69	17.86	79.8	61.94	PanAS
CPT1C	HsaEX0017080	chr19:50195078-50195146	69	chr19:50194597,50195078-50195146,50195496	C1	35	100	63.43	28	86.67	58.67	PanAS
AMICA1	HsaEX0003936	chr11:118085539-118085601	63	chr11:118095656,118085539-118085601,118083184+118083276	S	34	100	63.11	31.37	82.63	51.26	PanAS
LTB	HsaEX0036881	chr6:31549591-31549636	46	chr6:31550033,31549591-31549636,31549407	S	34	100	56.96	38.24	72.67	34.43	PanAS
WIZ	HsaEX0071546	chr19:15541823-15541993	171	chr19:15547617,15541823-15541993,15540900	S	34	100	65.89	37.14	86.27	49.13	PanAS
AC093734.11	HsaEX0001436	chr7:1622798-1622905	108	chr7:1615524,1622798-1622905,1624020	C2	34	100	66.52	34.62	89.74	55.12	PanAS
CTC-564N23.3	HsaEX0017718	chr5:76394480-76394572	93	chr5:76383444,76394480-76394572,76414145	C3	34	100	55.37	19.41	89.82	70.41	PanAS
AQP7	HsaEX0005239	chr9:33386967-33387090	124	chr9:33395076,33386967-33387090,33386539	C2	34	100	59.97	10.34	85.17	74.83	PanAS
RP11-597D13.9	HsaEX0055050	chr4:159119940-159120022	83	chr4:159100887,159119940-159120022,159120240	S	33	100	60.87	25	85.02	60.02	PanAS
RP11-206L10.3	HsaEX0054530	chr1:679564-679771	208	chr1:680108,679564-679771,679353	C1	33	100	66.11	23.4	89.96	66.56	PanAS
SMARCD1	HsaEX0060331	chr12:50493583-50493683	101	chr12:50493348,50493542+50493583-50493683,50493837	S	32	100	47.23	11.76	84.21	72.45	PanAS
CTD-2230D16.1	HsaEX0017752	chr3:64795470-64795526	57	chr3:64785421,64795470-64795526,64852843	S	32	100	55.76	30.67	78.7	48.03	PanAS
RPL32P3	HsaEX0055507	chr3:129117851-129117876	26	chr3:129118224,129117851-129117876,129115983	C1	32	100	64.14	20.76	87.14	66.38	PanAS
ASTN2	HsaEX0006378	chr9:119903605-119903757	153	chr9:119976637,119903605-119903757,119858430	S	32	100	59.33	35.61	79.87	44.26	PanAS
ZNF620	HsaEX0074073	chr3:40553893-40554006	114	chr3:40553087,40553893-40554006,40557351	C2	32	100	32.09	13.79	69.54	55.75	PanAS
CBFA2T3	HsaEX0012716	chr16:88964486-88964560	75	chr16:88967912,88964486-88964560,88958893	S	31	100	52.89	36.67	81.2	44.53	PanAS
RP1-122P22.2	HsaEX0054280	chr20:19738950-19738971	22	chr20:19738583+19738735,19738950-19738971,19780266	S	31	100	48.34	16.28	67.47	51.19	PanAS
RBM41	HsaEX0052719	chrX:106331666-106331803	138	chrX:106331965,106331666-106331803,106312560+106312632	C1	31	100	47.6	17.73	70.25	52.52	PanAS
FOXP2	HsaEX0026287	chr7:114178381-114178438	58	chr7:114174761,114178381-114178438,114268595	C1	31	100	31.07	11.26	56.25	44.99	PanAS
PRR5L	HsaEX0050438	chr11:36415396-36415561	166	chr11:36398254+36398258,36415396-36415561,36422547	C1	31	100	53.5	20.47	73.06	52.59	PanAS
C2orf63	HsaEX0010750	chr2:55436540-55436652	113	chr2:55436766,55436540-55436652,55433512	C2	31	100	57.55	17.1	89.32	72.22	PanAS
RIMS2	HsaEX0053681	chr8:104922549-104922757	209	chr8:104898451,104922549-104922757,104924281	C3	31	100	43.51	13.61	85	71.39	PanAS
BDNFOS	HsaEX0007970	chr11:27605816-27605884	69	chr11:27561663,27605816-27605884,27661392	C1	31	100	47.11	12.82	86.67	73.85	PanAS
BAZ2B	HsaEX0007744	chr2:160491696-160491834	139	chr2:160527219,160491696-160491834+160491837,160473112	C1	30	100	41.84	15.38	67.44	52.06	PanAS
RP11-499P20.2	HsaEX0054940	chr10:18828123-18828228	106	chr10:18830998,18828123-18828228,18802589	S	30	100	33.91	11.69	67.4	55.71	PanAS
GLIS3	HsaEX0027639	chr9:4125734-4125941	208	chr9:4286038,4125734-4125941,4118881	C1	30	100	57.41	28.13	83.28	55.15	PanAS
FBF1	HsaEX0024985	chr17:73931713-73931754	42	chr17:73933647,73931713-73931754,73929169	S	30	100	55.33	33.33	78.02	44.69	PanAS
TMEM22	HsaEX0065729	chr3:136538146-136538205	60	chr3:136538056+136538110,136538146-136538205+136538470,136573285+136573399	S	29	100	40.79	20	62.89	42.89	PanAS
UBE2Q2P1	HsaEX0068793	chr15:85070850-85070898	49	chr15:85081763,85070850-85070898,85070107	S	29	100	48.03	14.41	71.44	57.03	PanAS
NAV3	HsaEX0041781	chr12:78520947-78520988	42	chr12:78516208,78520947-78520988,78522486	C1	29	100	47.21	15.98	80.2	64.22	PanAS
CCDC18	HsaEX0013160	chr1:93735904-93736371	468	chr1:93730458,93735904-93736371,93744020	S	29	100	47.96	18.58	83.54	64.96	PanAS
ZDHHC8P	HsaEX0072555	chr22:23744224-23744342	119	chr22:23744548,23744224-23744342,23742770	C3	29	100	61.06	25.81	85.28	59.47	PanAS
RP11-480I12.5	HsaEX0054907	chr1:202826775-202827292	518	chr1:202828010,202826775-202827292,202822408	S	29	100	32.89	16.62	67.49	50.87	PanAS
RP11-30E17.3	HsaEX0054617	chr13:79991970-79992051	82	chr13:79980437+79980612,79991970-79992051,79994895	C2	29	100	63.47	28.21	89.15	60.94	PanAS
RP1-67M12.1	HsaEX0054334	chr6:22063249-22063469	221	chr6:22056919,22063249-22063469,22110976	C1	29	100	33.53	18.58	54.97	36.39	PanAS
AC007405.6	HsaEX0000928	chr2:171627739-171627937	199	chr2:171627654+171627697,171627739-171627937,171633657	C2	29	100	39.51	10.01	69.7	59.69	PanAS
MEMO1	HsaEX0038823	chr2:32175667-32175786	120	chr2:32181516,32175667-32175786,32168452	C3	29	100	41.17	13.33	89.33	76	PanAS
ITPRIPL1	HsaEX0032602	chr2:96991485-96991587	103	chr2:96991303,96991485-96991587,96992380	S	28	100	48.98	15.12	88.06	72.94	PanAS
ITIH4	HsaEX0032518	chr3:52853956-52854006	51	chr3:52854307,52853956-52854006,52853534	C2	28	100	52	10.81	85.93	75.12	PanAS
B3GAT1	HsaEX0007440	chr11:134263480-134263708	229	chr11:134281701,134263480-134263708+134263711,134257834	S	28	100	30.06	15.5	54.01	38.51	PanAS
DNAH1	HsaEX0020100	chr3:52357824-52357896	73	chr3:52356791,52357824-52357896,52360156	C1	28	100	48.36	12.5	85.07	72.57	PanAS
BRSK2	HsaEX0008511	chr11:1478185-1478279	95	chr11:1477862+1477917,1478185-1478279,1480422	S	28	100	56.32	26	80.12	54.12	PanAS
ZNF730	HsaEX0074273	chr19:23278065-23278242	178	chr19:23258189,23278065-23278242,23281142	C3	28	100	51.31	13.44	87.41	73.97	PanAS
C19orf54	HsaEX0010006	chr19:41247599-41247769	171	chr19:41247978,41247599-41247769,41247344	C2	28	100	68.16	44.26	88.89	44.63	PanAS
UROS	HsaEX0069532	chr10:127477852-127477932	81	chr10:127483449,127477852-127477932+127478007+127478097,127473829	C1	28	100	41.74	11.99	77.41	65.42	PanAS
ZNF334	HsaEX0073445	chr20:45140721-45140779	59	chr20:45141179,45140721-45140779,45133372+45133379	C2	28	100	54.15	16.09	87.43	71.34	PanAS
RP11-37B2.1	HsaEX0054711	chr8:90734243-90734309	67	chr8:90769273,90734243-90734309+90734384,90629385	C3	28	100	46.88	13.33	77.83	64.5	PanAS
RPL22	HsaEX0055496	chr1:6253007-6253108	102	chr1:6257712,6253007-6253108,6246876	S	28	100	62.48	38.78	89.69	50.91	PanAS
GPR161	HsaEX0028351	chr1:168083694-168083787	94	chr1:168105495,168083694-168083787,168074132	C2	28	100	57.25	28.14	76.65	48.51	PanAS
ZNF202	HsaEX0073168	chr11:123611125-123611244	120	chr11:123612257,123611125-123611244,123601693	S	28	100	58	24.4	87.28	62.88	PanAS
SGCA	HsaEX0057761	chr17:48247504-48247712	209	chr17:48245933,48247504-48247712+48247716,48248001	C2	27	100	67.47	52.48	83.66	31.18	PanAS
PTP4A2	HsaEX0050905	chr1:32396534-32396743	210	chr1:32403588,32396534-32396743,32377427+32377442	C3	27	100	28.72	10.48	78.49	68.01	PanAS
WDR27	HsaEX0071048	chr6:170067232-170067283	52	chr6:170072351,170067232-170067283,170064382+170064728	C3	27	100	59.74	11.83	87.41	75.58	PanAS
PPAPDC1A	HsaEX0049269	chr10:122280518-122280607	90	chr10:122263438,122280483+122280518-122280607,122334643	C2	27	100	70.44	47.62	86.67	39.05	PanAS
RP4-694B14.5	HsaEX0055284	chr20:25626167-25626284	118	chr20:25615463,25626167-25626284,25654488	C1	27	100	71.76	51.33	89.53	38.2	PanAS
KRIT1	HsaEX0035022	chr7:91874741-91874909	169	chr7:91875220,91874741-91874909,91874485	C3	27	100	60.94	35.14	89.73	54.59	PanAS
PLCB4	HsaEX0048073	chr20:9076934-9076989	56	chr20:9049550,9076934-9076989,9198037	C2	27	100	47.44	17.94	84.83	66.89	PanAS
DENND2A	HsaEX0019129	chr7:140305505-140305606	102	chr7:140340304,140305505-140305606,140302342	C1	27	100	54.07	18.52	78.31	59.79	PanAS
DDO	HsaEX0018846	chr6:110725977-110726153	177	chr6:110729537,110725977-110726153,110714545	S	27	100	59.45	27.27	78.69	51.42	PanAS
PVRL4	HsaEX0051344	chr1:161043015-161043089	75	chr1:161043510,161043015-161043089,161042675	S	26	100	61.81	26.19	85.11	58.92	PanAS
PANX2	HsaEX0045384	chr22:50613861-50613911	51	chr22:50609385,50613861-50613911,50615368	S	26	100	49.48	15.38	73.72	58.34	PanAS
RAP1GAP	HsaEX0052208	chr1:21991704-21991810	107	chr1:21995747,21991704-21991810,21976289	C2	26	100	37.89	11.56	85.38	73.82	PanAS
GDPD2	HsaEX0027282	chrX:69644826-69644939	114	chrX:69643232,69644826-69644939,69645613	C3	26	100	63.59	27.27	89.66	62.39	PanAS
SLC9A5	HsaEX0060054	chr16:67291434-67291504	71	chr16:67291337,67291434-67291504,67292221	C1	26	100	69.31	14.22	89.03	74.81	PanAS
GAS2L3	HsaEX0027069	chr12:100985514-100985634	121	chr12:100967563,100985514-100985634,100988653	C3	26	100	47.76	20.69	80.49	59.8	PanAS
NTRK3	HsaEX0044095	chr15:88671942-88671965	24	chr15:88678332,88671942-88671965,88670457	S	26	100	66.1	42.86	80.29	37.43	PanAS
ANKAR	HsaEX0004166	chr2:190575775-190575879	105	chr2:190571868+190571872,190575775-190575879,190584298	S	26	100	40.65	16.11	64.81	48.7	PanAS
PRDM8	HsaEX0049977	chr4:81117167-81117278	112	chr4:81115393,81117167-81117278,81117506	C2	26	100	42.09	16.67	69.62	52.95	PanAS
MEI1	HsaEX0038780	chr22:42180612-42180787	176	chr22:42177849,42180612-42180787,42189833	C2	26	100	45.39	10.09	80.96	70.87	PanAS
PARP15	HsaEX0045590	chr3:122345674-122345880	207	chr3:122340458,122345674-122345880,122350933	S	26	100	48.17	25.71	63.9	38.19	PanAS
RP1-67M12.1	HsaEX0054343	chr6:21802888-21802971	84	chr6:21783939,21802888-21802971,21909701	C1	26	100	49.57	18.64	77.52	58.88	PanAS
GPR162	HsaEX0028360	chr12:6933175-6933880	706	chr12:6932929,6933175-6933880+6933931,6934649	S	26	100	66.78	34.6	89.06	54.46	PanAS
MID1	HsaEX0039247	chrX:10588330-10588459	130	chrX:10851673,10588330-10588459,10535643	S	26	100	45.6	15.64	82.74	67.1	PanAS
AGTR1	HsaEX0003187	chr3:148425731-148425814	84	chr3:148415914,148425731-148425814,148458776	C1	26	100	46.71	17.63	69.01	51.38	PanAS
ANKDD1A	HsaEX0004179	chr15:65207996-65208099	104	chr15:65204163,65207996-65208099,65209585	C2	26	100	55.3	12.98	88.48	75.5	PanAS
PIGW	HsaEX0047483	chr17:34891166-34891440	275	chr17:34890881,34891166-34891440+34891449,34892943	S	25	100	59.03	32.74	73.6	40.86	PanAS
ZNF643	HsaEX0074117	chr1:40919875-40919960	86	chr1:40916760,40919875-40919960,40922617	S	25	100	52.8	25.49	85	59.51	PanAS
RP11-438E5.1	HsaEX0054829	chr4:80116990-80117086	97	chr4:80007416,80116990-80117086,80227845	S	25	100	55.2	32.57	77.41	44.84	PanAS
INTS6	HsaEX0031916	chr13:51995248-51995470	223	chr13:52004430,51995248-51995470,51963580	C3	25	100	56.34	24.76	88.68	63.92	PanAS
C9orf68	HsaEX0011709	chr9:4646487-4646528	42	chr9:4656041,4646487-4646528,4635399	C1	25	100	39.35	10.29	83.78	73.49	PanAS
STK33	HsaEX0062508	chr11:8502081-8502161	81	chr11:8615291+8615630,8501957+8502030+8502081-8502161,8496363+8496613	C2	25	100	29.02	12.55	56.59	44.04	PanAS
RP3-475N16.1	HsaEX0055246	chr6:42909248-42909353	106	chr6:42908667,42909248-42909353,42911536	S	25	100	31.66	11.11	64.52	53.41	PanAS
ZNF530	HsaEX0073876	chr19:58112096-58112147	52	chr19:58111502,58112096-58112147+58115774,58115645	S	25	100	53.95	13.04	85.92	72.88	PanAS
C10orf128	HsaEX0008787	chr10:50373811-50373841	31	chr10:50374490+50374914,50373811-50373841,50369667	C1	24	100	73.71	47.65	87.47	39.82	PanAS
VIT	HsaEX0070383	chr2:37008870-37008914	45	chr2:37002210,37008870-37008914,37010483	C1	24	100	40.73	17.39	66.13	48.74	PanAS
BCL11B	HsaEX0007880	chr14:99697682-99697894	213	chr14:99723808,99697682-99697894,99642532	C1	24	100	45.21	13.51	71.93	58.42	PanAS
CHRM3	HsaEX0015303	chr1:239795524-239795586	63	chr1:239709049,239795524-239795586,239841486	C1	24	100	67.98	38.12	89.01	50.89	PanAS
KIAA1529	HsaEX0034154	chr9:100109596-100109771	176	chr9:100105845,100109596-100109771,100111393	C2	24	100	49.44	26.33	76.84	50.51	PanAS
DSC3	HsaEX0020999	chr18:28574420-28574462	43	chr18:28576757,28574420-28574462,28574338	S	23	100	44.21	23.08	77.14	54.06	PanAS
GATAD1	HsaEX0027103	chr7:92086866-92086903	38	chr7:92083999,92086866-92086903,92090633	S	23	100	55.03	23.02	84.79	61.77	PanAS
C5orf34	HsaEX0011119	chr5:43509247-43509477	231	chr5:43514908,43509247-43509477,43508768	C1	23	100	61.41	16.67	87.23	70.56	PanAS
AC136007.2	HsaEX0001616	chr2:70215874-70215970	97	chr2:70223818,70215874-70215970,70190632	C1	23	100	61.64	19.3	85.54	66.24	PanAS
NRXN1	HsaEX0043858	chr2:50755763-50755789	27	chr2:50758365,50755763-50755789,50733755	S	23	100	58.48	13.73	85.91	72.18	PanAS
MACC1	HsaEX0037137	chr7:20210337-20210401	65	chr7:20256922,20210337-20210401+20210404,20201493	C2	23	100	61.05	11.63	84.06	72.43	PanAS
L3MBTL	HsaEX0035135	chr20:42159438-42159529	92	chr20:42159059,42159178+42159430+42159438-42159529,42161413	C1	23	100	60.23	15.45	84.18	68.73	PanAS
AC004540.5	HsaEX0000835	chr7:26451805-26451859	55	chr7:26443137,26451805-26451859,26533415	C2	23	100	47.58	19.23	87.41	68.18	PanAS
RP11-792D21.2	HsaEX0055150	chr4:79584072-79584126	55	chr4:79570863,79584072-79584126+79584165,79601915	C1	23	100	35.24	12.5	66.67	54.17	PanAS
ZNF391	HsaEX0073578	chr6:27362796-27362874	79	chr6:27356854,27362796-27362874,27367221	S	23	100	35.74	11.76	65.33	53.57	PanAS
NAALADL2	HsaEX0041529	chr3:174254411-174254473	63	chr3:174158822,174254411-174254473,174268359	C2	23	100	39.68	21.54	86.21	64.67	PanAS
CD1C	HsaEX0013774	chr1:158263002-158263092	91	chr1:158262664,158263002-158263092,158263245	S	22	100	70.59	41.94	85.29	43.35	PanAS
UPK3B	HsaEX0069466	chr7:76142401-76142480	80	chr7:76141199,76142401-76142480,76143264	S	22	100	41.5	13.04	75.86	62.82	PanAS
NRXN2	HsaEX0043865	chr11:64421168-64421194	27	chr11:64427804,64421168-64421194,64419626	S	22	100	57.94	11.98	89.04	77.06	PanAS
GRK4	HsaEX0028745	chr4:3037113-3037250	138	chr4:3031136,3037113-3037250,3042299	C3	22	100	46.23	17.36	79.56	62.2	PanAS
MORN3	HsaEX0039831	chr12:122090981-122091165	185	chr12:122092180,122090981-122091165,122090714	C1	22	100	58.02	16.67	88.24	71.57	PanAS
CCDC15	HsaEX0013081	chr11:124861357-124861479	123	chr11:124858030,124861357-124861479,124862476	C1	22	100	43.54	14.82	81.24	66.42	PanAS
AC004540.5	HsaEX0000834	chr7:26443016-26443137	122	chr7:26438641,26443016-26443137,26533415	C2	22	100	56.67	32.65	86.05	53.4	PanAS
RP11-27I1.2	HsaEX0054579	chr9:123606101-123607177	1077	chr9:123605717+123605807,123606101-123607177,123607271	S	22	100	41.97	14.29	73.98	59.69	PanAS
PAX6	HsaEX0045708	chr11:31823419-31823460	42	chr11:31824252,31823419-31823460,31823324	S	22	100	26.26	10.91	47.21	36.3	PanAS
ZNF347	HsaEX0073499	chr19:53661933-53662122	190	chr19:53662262,53661933-53662122,53657046	S	22	100	36.18	13.16	61.81	48.65	PanAS
RBFOX1	HsaEX0052566	chr16:7743317-7743369	53	chr16:7726840,7743317-7743369,7759058	S	21	100	41.77	17.46	78.29	60.83	PanAS
RP5-1180C10.2	HsaEX0055353	chr1:180241748-180241827	80	chr1:180242473,180241748-180241827,180239558	S	21	100	30.21	10.53	84.62	74.09	PanAS
RP13-507I23.1	HsaEX0055211	chrX:149116296-149116393	98	chrX:149115565,149116296-149116393,149116524	S	21	100	45.99	22.73	66.67	43.94	PanAS
STYK1	HsaEX0062800	chr12:10789670-10789795	126	chr12:10826565,10789670-10789795,10787285	S	21	100	48.49	18.71	70.52	51.81	PanAS
ADCY8	HsaEX0002775	chr8:131859670-131859759	90	chr8:131861848,131859670-131859759,131848695	S	21	100	52.77	26.53	73.91	47.38	PanAS
RUNX1	HsaEX0055969	chr21:36265222-36265260	39	chr21:36421139,36265222-36265260,36259393	S	21	100	72.62	62.13	85.11	22.98	PanAS
KCNT2	HsaEX0033134	chr1:196286304-196286399	96	chr1:196295847,196286278+196286304-196286399,196285151+196285156	C1	21	100	40.65	13.67	83.01	69.34	PanAS
AC091729.9	HsaEX0001379	chr7:1202598-1202853	256	chr7:1200120+1200259,1202598-1202853,1202979+1203088	C3	21	100	51.78	14.91	78.05	63.14	PanAS
NTRK2	HsaEX0044087	chr9:87475955-87476002	48	chr9:87367000,87425457+87475955-87476002,87482158	S	21	100	24.77	10.77	43.4	32.63	PanAS
MS4A1	HsaEX0040243	chr11:60228545-60228633	89	chr11:60223418,60228545-60228633,60229832	S	21	100	43.75	20	86.77	66.77	PanAS
ZBP1	HsaEX0072079	chr20:56191300-56191524	225	chr20:56195275+56195318,56191300-56191524,56190636	S	20	100	42.12	24.32	67.31	42.99	PanAS
RP11-369J21.6	HsaEX0054696	chr10:81845987-81846014	28	chr10:81841960+81841973,81845987-81846014,81850136	S	20	100	49.84	25	69.21	44.21	PanAS
PROK2	HsaEX0050320	chr3:71823596-71823658	63	chr3:71830618,71823596-71823658,71821979	S	20	100	47.01	19.3	89.53	70.23	PanAS
ANKS1B	HsaEX0004576	chr12:99139302-99139624	323	chr12:99145133,99139302-99139624+99139627+99139643,99129412	S	20	100	54.44	16.28	80.84	64.56	PanAS
RP13-507I23.1	HsaEX0055212	chrX:149130802-149130935	134	chrX:149129167,149130802-149130935,149184182	S	20	100	42.46	20.83	72.63	51.8	PanAS
TSNAXIP1	HsaEX0067611	chr16:67855002-67855128	127	chr16:67848304,67855002-67855128,67858486	C1	20	100	43.95	16.67	88.42	71.75	PanAS
C9orf68	HsaEX0011713	chr9:4626426-4626555	130	chr9:4629091,4626426-4626555,4625566	C1	20	100	53.21	19.72	86.67	66.95	PanAS
RHBDL3	HsaEX0053463	chr17:30611678-30611836	159	chr17:30593319,30611678-30611836,30615811	C2	20	100	67.3	24.2	88.95	64.75	PanAS
LPP	HsaEX0036292	chr3:187925988-187926106	119	chr3:187871151,187925988-187926106,187943193	C2	20	100	46.53	20.66	70.59	49.93	PanAS
ZDHHC24	HsaEX0072525	chr11:66294407-66294477	71	chr11:66311175,66294407-66294477,66288937	C2	20	100	50.2	11.03	75	63.97	PanAS
RP11-141M1.3	HsaEX0054439	chr13:34238027-34238274	248	chr13:34250815,34238027-34238274,34098509	C2	20	100	46.45	11.11	69.2	58.09	PanAS
RP11-217E22.2	HsaEX0054540	chr3:153837475-153837572	98	chr3:153838861,153837475-153837572+153837597,153748165+153748168	C2	20	100	65.61	35.28	79.48	44.2	PanAS
RUNX2	HsaEX0055986	chr6:45512954-45513019	66	chr6:45480144,45512954-45513019,45514564	S	20	100	49.89	18.79	78.69	59.9	PanAS
ARHGAP22	HsaEX0005441	chr10:49687679-49687807	129	chr10:49763508,49687679-49687807,49667934	C2	20	100	76.98	55.02	89.32	34.3	PanAS
MSN	HsaEX0040329	chrX:64923468-64923553	86	chrX:64921503,64923448+64923468-64923553,64936680	C2	20	100	56.57	24.53	79.39	54.86	PanAS
APLP2	HsaEX0005149	chr11:129993507-129993674	168	chr11:129992408,129993507-129993674,129996595	S	108	99	47.68	10.35	90.59	80.24	PanAS
HDDC2	HsaEX0029465	chr6:125619860-125619962	103	chr6:125621684,125619860-125619962,125614051+125614055	S	107	99	49.4	9.51	86.1	76.59	PanAS
ZC3H14	HsaEX0072239	chr14:89063078-89063152	75	chr14:89044484,89063078-89063152,89073587	C2	107	99	71.05	32.42	93.03	60.61	PanAS
ZC3H14	HsaEX0072241	chr14:89069172-89069389	218	chr14:89068427,89069172-89069389+89069404,89073587	C2	107	99	59.38	9.95	85.36	75.41	PanAS
ZRANB2	HsaEX0074528	chr1:71531361-71531435	75	chr1:71532459,71531361-71531435,71530820	S	107	99	54.12	25	100	75	PanAS
GPBP1	HsaEX0028133	chr5:56532940-56532999	60	chr5:56531850+56531859,56532940-56532999,56542127	S	106	99	24.79	5.16	70.94	65.78	PanAS
PPHLN1	HsaEX0049396	chr12:42745687-42745851	165	chr12:42729776,42745687-42745851,42748963	S	106	99	41.24	9.79	80.27	70.48	PanAS
ACIN1	HsaEX0001928	chr14:23559191-23559310	120	chr14:23559731,23559191-23559310,23551045	S	105	99	56.95	9.4	89.83	80.43	PanAS
ZFAND5	HsaEX0072595	chr9:74978386-74978522	137	chr9:74979612,74978386-74978522,74975700+74975703	S	105	99	59.16	17.23	90.58	73.35	PanAS
PTPMT1	HsaEX0050944	chr11:47591252-47591443	192	chr11:47587538,47591252-47591443,47593023	S	105	99	66.93	30.64	98.14	67.5	PanAS
UBP1	HsaEX0068919	chr3:33450182-33450289	108	chr3:33450728,33450182-33450289,33444396	S	105	99	43.16	16.85	90.81	73.96	PanAS
C1orf52	HsaEX0010293	chr1:85724618-85724744	127	chr1:85725041,85724618-85724744,85724405	S	105	99	54.35	17.36	99	81.64	PanAS
ACP1	HsaEX0002006	chr2:272192-272305	114	chr2:271939,272192-272305,275140	C3	105	99	35.27	7	89.67	82.67	PanAS
C10orf84	HsaEX0008926	chr10:120101239-120101439	201	chr10:120101782,120101239-120101439+120101460,120095932+120095935	S	105	99	60.73	22.57	97.71	75.14	PanAS
MAX	HsaEX0038060	chr14:65568264-65568290	27	chr14:65569022,65568264-65568290,65560533	S	105	99	44.87	2.83	75.29	72.46	PanAS
KDM1A	HsaEX0033220	chr1:23370920-23370979	60	chr1:23357127,23370920-23370979,23376880	S	104	99	53.65	24.43	92.83	68.4	PanAS
DNAJA3	HsaEX0020236	chr16:4504812-4504928	117	chr16:4500498,4504812-4504928,4505547	S	104	99	26.86	6.73	42.46	35.73	PanAS
WBP5	HsaEX0070863	chrX:102612011-102612089	79	chrX:102611534,102612011-102612089,102612543+102612546	S	104	99	72.18	34.39	90.38	55.99	PanAS
MEF2A	HsaEX0038695	chr15:100211725-100211862	138	chr15:100185969,100211725-100211862,100214598	C3	104	99	32.58	8.37	81.8	73.43	PanAS
RBM23	HsaEX0052656	chr14:23377542-23377589	48	chr14:23378692,23377542-23377589,23375577	S	104	99	34.34	7.24	60.87	53.63	PanAS
P4HA1	HsaEX0045118	chr10:74803645-74803715	71	chr10:74806683,74803645-74803715,74790128	C3	104	99	58.18	7.69	88.29	80.6	PanAS
ANAPC11	HsaEX0004046	chr17:79851428-79851490	63	chr17:79849581+79849709+79849717+79849729+79849739+79849982,79851428-79851490,79852343	S	104	99	53.36	26.56	91.3	64.74	PanAS
PI4KA	HsaEX0047288	chr22:21084180-21084299	120	chr22:21087259,21084180-21084299,21073110	C2	104	99	54.12	8.93	89.46	80.53	PanAS
PI4KA	HsaEX0047289	chr22:21083920-21083999	80	chr22:21087259,21083920-21083999,21073110	C3	104	99	50.41	9.47	89.72	80.25	PanAS
RHOT1	HsaEX0053530	chr17:30538135-30538257	123	chr17:30536464,30538135-30538257,30551635	C3	104	99	38.21	6.17	72.96	66.79	PanAS
MRPL33	HsaEX0040122	chr2:27997291-27997397	107	chr2:27995559,27997291-27997397,28002300	S	104	99	49.04	16.6	90.16	73.56	PanAS
MAZ	HsaEX0038064	chr16:29820861-29821085	225	chr16:29820062,29820861-29821085,29821398	S	103	99	29.95	9.4	75.88	66.48	PanAS
RALY	HsaEX0052111	chr20:32661625-32661672	48	chr20:32661441,32661625-32661672,32663680	S	103	99	72.58	42.21	91.52	49.31	PanAS
ZNF146	HsaEX0073073	chr19:36709024-36709097	74	chr19:36705922+36706057+36706091+36706098,36709024-36709097,36719650	S	103	99	54.55	8.03	88.59	80.56	PanAS
TMEM126B	HsaEX0065426	chr11:85342189-85342360	172	chr11:85339732,85342189-85342360,85342731	C1	103	99	51.28	12.9	94.85	81.95	PanAS
ILF3	HsaEX0031555	chr19:10795092-10795152	61	chr19:10794646,10795092-10795152,10798022	S	102	99	49.9	19.78	95.09	75.31	PanAS
TRIM33	HsaEX0067095	chr1:114940562-114940612	51	chr1:114942079,114940562-114940612,114940482	S	102	99	52	25.2	96	70.8	PanAS
DNM1L	HsaEX0020451	chr12:32890799-32890876	78	chr12:32890095,32890799-32890876,32891198	C2	102	99	41.14	7.94	89.82	81.88	PanAS
PAM	HsaEX0045320	chr5:102360838-102361038	201	chr5:102355547,102360835+102360838-102361038,102363886+102363889	C1	102	99	63.51	21.72	100	78.28	PanAS
FAM96A	HsaEX0024694	chr15:64373301-64373350	50	chr15:64380886,64373301-64373350,64367736	S	102	99	70.13	18.49	94.22	75.73	PanAS
RBPJ	HsaEX0052808	chr4:26364068-26364250	183	chr4:26322437+26322670,26364068-26364250,26387975	S	102	99	50.79	11.02	95.06	84.04	PanAS
DHRS4L2	HsaEX0019538	chr14:24470072-24470142	71	chr14:24464342,24470072-24470142,24473546	C2	102	99	44.33	2.82	85.1	82.28	PanAS
DHRS4L2	HsaEX0019539	chr14:24470242-24470293	52	chr14:24470142,24470242-24470293,24473546	C3	102	99	48.84	7.63	85.85	78.22	PanAS
KTN1	HsaEX0035076	chr14:56068475-56068598	124	chr14:56047072,56068475-56068598,56078737	S	102	99	29.05	9.83	78.4	68.57	PanAS
DCAF8	HsaEX0018649	chr1:160231075-160231148	74	chr1:160231907,160231075-160231148,160213824	C2	102	99	57.65	35.17	94.87	59.7	PanAS
NIPA2	HsaEX0042960	chr15:23027801-23027922	122	chr15:23034121+23034147,23027801-23027922,23021359+23021429	C2	101	99	37.79	2.73	66.66	63.93	PanAS
SETD5	HsaEX0057499	chr3:9471515-9471735	221	chr3:9470693,9471511+9471515-9471735,9475529	C2	101	99	58.94	14.48	90.32	75.84	PanAS
SF1	HsaEX0057563	chr11:64533423-64533627	205	chr11:64534372,64533423-64533627,64532990	S	101	99	34.01	1.16	61.35	60.19	PanAS
CD151	HsaEX0013751	chr11:834530-834591	62	chr11:833026,834530-834591,836063	C1	101	99	52.88	15.25	94.54	79.29	PanAS
AL117209.2	HsaEX0003523	chr14:103420535-103420612	78	chr14:103420939,103420535-103420612,103418940	S	100	99	57.25	13.97	98.16	84.19	PanAS
SLMAP	HsaEX0060183	chr3:57857363-57857425	63	chr3:57850443,57857363-57857425,57875768+57875773	C2	100	99	43.93	5.52	71.16	65.64	PanAS
RAG1AP1	HsaEX0051988	chr1:155109304-155109427	124	chr1:155108852+155108872,155109304-155109427,155110037+155110055	C1	100	99	65.48	31.98	100	68.02	PanAS
TMEM11	HsaEX0065380	chr17:21114249-21114540	292	chr17:21117404,21114249-21114540,21102153	S	100	99	29.21	3.45	71.52	68.07	PanAS
YIPF1	HsaEX0071983	chr1:54320674-54320724	51	chr1:54325729,54320674-54320724,54317943	S	99	99	59.39	24.75	100	75.25	PanAS
RAPGEF2	HsaEX0052259	chr4:160272211-160272285	75	chr4:160271441,160272211-160272285+160272333,160273837	S	99	99	48.31	6.51	78.75	72.24	PanAS
NCOR1	HsaEX0042119	chr17:16054904-16054930	27	chr17:16055260,16054904-16054930,16052831	S	99	99	30.77	7.11	62.3	55.19	PanAS
NIPA2	HsaEX0042957	chr15:23033278-23033413	136	chr15:23034121+23034147,23033278-23033413,23021359+23021429	C2	99	99	46.51	6.44	84.15	77.71	PanAS
BTBD10	HsaEX0008616	chr11:13466571-13466700	130	chr11:13484639+13484647+13484821,13466571-13466700+13466728,13443362+13443385	S	99	99	47.8	3.31	89.85	86.54	PanAS
RNF38	HsaEX0054121	chr9:36390464-36390613	150	chr9:36424610,36390464-36390613,36376124	C2	99	99	36.71	9.07	89.01	79.94	PanAS
ZNF76	HsaEX0074312	chr6:35261528-35261662	135	chr6:35260821,35261528-35261662+35261692,35262233	S	98	99	69.03	35.35	100	64.65	PanAS
IFT20	HsaEX0031044	chr17:26659172-26659207	36	chr17:26662366,26659172-26659207+26659408,26659013	S	98	99	44.11	8.67	77.33	68.66	PanAS
C15orf17	HsaEX0009533	chr15:75198619-75198706	88	chr15:75198928,75198619-75198706,75197567+75197572	S	98	99	71.25	21.51	93.37	71.86	PanAS
PSPC1	HsaEX0050672	chr13:20279802-20279971	170	chr13:20304379,20279802-20279971,20251963	C3	98	99	54.23	19.08	91.24	72.16	PanAS
SLC25A26	HsaEX0059050	chr3:66286968-66287124	157	chr3:66271284+66271553,66286968-66287124,66293627	S	98	99	58.22	21.74	94.92	73.18	PanAS
FAM193B	HsaEX0024336	chr5:176958283-176958522	240	chr5:176958954,176958283-176958522,176952206	C2	98	99	68.09	24.44	93.94	69.5	PanAS
C11orf17	HsaEX0008952	chr11:8934000-8934080	81	chr11:8933218,8934000-8934080,8936373	S	98	99	45.26	15.18	90.77	75.59	PanAS
ENTPD6	HsaEX0022555	chr20:25187158-25187226	69	chr20:25176503,25187158-25187226,25187712+25187715	C1	98	99	45.33	10.52	100	89.48	PanAS
PMS2	HsaEX0048677	chr7:6029431-6029586	156	chr7:6031604,6029431-6029586,6027251	S	98	99	53.79	6.85	84.32	77.47	PanAS
LTBP4	HsaEX0036952	chr19:41123006-41123130	125	chr19:41122926+41122948,41123006-41123130,41125252	C2	97	99	64.29	24.14	96.06	71.92	PanAS
TARS2	HsaEX0063667	chr1:150468958-150469104	147	chr1:150464965,150468958-150469104,150470006	C2	97	99	60.95	25.96	91.51	65.55	PanAS
TRPT1	HsaEX0067439	chr11:63993258-63993341	84	chr11:63993522+63993534+63993570+63993663,63993258-63993341,63993052	S	97	99	65.69	30.65	94.35	63.7	PanAS
UPP1	HsaEX0069470	chr7:48141421-48141467	47	chr7:48134424,48141421-48141467+48141579,48146470	C2	97	99	50.62	5	89.01	84.01	PanAS
PISD	HsaEX0047731	chr22:32021749-32022002	254	chr22:32044087,32021567+32021749-32022002,32017808+32017871	C2	97	99	40.2	5.42	86.63	81.21	PanAS
YIPF1	HsaEX0071980	chr1:54354917-54355136	220	chr1:54355386,54354917-54355136,54354659	S	97	99	47.7	13.87	92.86	78.99	PanAS
C1D	HsaEX0010042	chr2:68280193-68280269	77	chr2:68290077,68280193-68280269,68274451	C2	97	99	37.81	9.28	85.73	76.45	PanAS
REPIN1	HsaEX0053043	chr7:150066760-150066957	198	chr7:150066030,150066760-150066957,150068317	C2	97	99	57.28	10.65	94.02	83.37	PanAS
AXIN1	HsaEX0007386	chr16:341190-341297	108	chr16:343488,341190-341297,339607	S	96	99	37.02	8.96	74.84	65.88	PanAS
KRIT1	HsaEX0035033	chr7:91874216-91874448	233	chr7:91875104+91875136+91875158+91875220,91874216-91874448+91874485,91871451+91871475	C3	96	99	53.36	11.66	94.74	83.08	PanAS
PI4KB	HsaEX0047300	chr1:151298648-151298849	202	chr1:151299747,151298648-151298849,151288985	C1	96	99	43.46	8.33	85.25	76.92	PanAS
ORMDL1	HsaEX0044848	chr2:190647740-190647849	110	chr2:190648995,190647740-190647849,190647328	S	96	99	37.52	0	75.68	75.68	PanAS
FAM193B	HsaEX0024331	chr5:176974169-176974229	61	chr5:176980169,176974169-176974229,176966148	C2	96	99	25.34	9.71	56.08	46.37	PanAS
CTDP1	HsaEX0017799	chr18:77488907-77489069	163	chr18:77478016,77488907-77489069,77496355	C1	95	99	67.9	25.16	95.02	69.86	PanAS
MANBAL	HsaEX0037440	chr20:35927166-35927282	117	chr20:35918089,35927166-35927282,35929574+35929611	C1	95	99	60.02	32.92	94.74	61.82	PanAS
LRRC42	HsaEX0036615	chr1:54413461-54413494	34	chr1:54412222,54413461-54413494,54417659	C1	95	99	38.27	11.27	96.37	85.1	PanAS
CBR4	HsaEX0012754	chr4:169919353-169919436	84	chr4:169923222,169919353-169919436,169911479	C1	95	99	29.42	9.09	59.42	50.33	PanAS
MCAT	HsaEX0038186	chr22:43533087-43533304	218	chr22:43537168,43533087-43533304,43529439+43529448+43529492	S	94	99	53.47	0	88.06	88.06	PanAS
SMAD5	HsaEX0060230	chr5:135483525-135483595	71	chr5:135468651,135483521+135483525-135483595,135489281	S	94	99	58.61	20	95.9	75.9	PanAS
NCRNA00183	HsaEX0042169	chrX:73166834-73166889	56	chrX:73164497,73166834-73166889+73166931,73218603	C3	94	99	43.3	3.54	87.81	84.27	PanAS
FOXN3	HsaEX0026253	chr14:89656728-89656793	66	chr14:89747294,89656728-89656793,89647150	S	94	99	41.83	4.9	82.1	77.2	PanAS
TCF3	HsaEX0064165	chr19:1615284-1615519	236	chr19:1615685,1615284-1615519,1612432	C1	94	99	43.54	18.74	90.72	71.98	PanAS
PRKRIP1	HsaEX0050240	chr7:102036424-102036984	561	chr7:102016769,102036424-102036984,102038067	C1	94	99	50.98	5.45	83.83	78.38	PanAS
ABI2	HsaEX0000647	chr2:204276008-204276094	87	chr2:204267457,204276008-204276094,204281631	S	94	99	51.74	24.44	100	75.56	PanAS
BBX	HsaEX0007801	chr3:107508634-107508723	90	chr3:107497366,107508634-107508723,107510087	S	93	99	50.05	9.66	85.96	76.3	PanAS
ZMIZ2	HsaEX0072863	chr7:44799750-44799827	78	chr7:44799059+44799345,44799750-44799827,44800024	S	93	99	44.69	9.09	86.67	77.58	PanAS
PCNX	HsaEX0045972	chr14:71462458-71462560	103	chr14:71445365,71462458-71462560+71462642,71476351	C2	93	99	54.14	14.86	91.19	76.33	PanAS
TAZ	HsaEX0063723	chrX:153642438-153642527	90	chrX:153641904,153642438-153642527,153647882	S	93	99	37.34	9.39	76.47	67.08	PanAS
DHX30	HsaEX0019585	chr3:47860726-47860754	29	chr3:47859607,47860726-47860754,47868837+47868889	C1	93	99	31.89	0	75.93	75.93	PanAS
HAUS2	HsaEX0029277	chr15:42852980-42853068	89	chr15:42851606,42852980-42853068,42853468+42853473	C1	93	99	32.88	2	58.87	56.87	PanAS
NFIC	HsaEX0042741	chr19:3456548-3456633	86	chr19:3452664,3456548-3456633,3462750	C1	93	99	64	39.55	96.23	56.68	PanAS
WDR85	HsaEX0071398	chr9:140470761-140470854	94	chr9:140471922+140472029,140470761-140470854,140470619	C1	93	99	40.03	8.51	77.78	69.27	PanAS
N6AMT2	HsaEX0041444	chr13:21311862-21311944	83	chr13:21331594,21311862-21311944,21306260	C1	93	99	60.89	7.69	88.41	80.72	PanAS
C3orf23	HsaEX0010872	chr3:44399709-44399795	87	chr3:44399368,44399709-44399795+44399837,44402857	S	93	99	31.57	8.4	74.58	66.18	PanAS
AC136007.2	HsaEX0001613	chr2:70310670-70310819	150	chr2:70312679,70310639+70310670-70310819,70278437	C2	93	99	56.26	24.41	90.26	65.85	PanAS
ZNF195	HsaEX0073151	chr11:3382973-3383119	147	chr11:3392205,3382973-3383119,3381795	C1	93	99	43.94	11.69	93.31	81.62	PanAS
SCMH1	HsaEX0056512	chr1:41617286-41617356	71	chr1:41625397,41617286-41617356,41608784	C2	93	99	68.57	22.65	91.25	68.6	PanAS
C12orf23	HsaEX0009127	chr12:107350860-107350927	68	chr12:107349843,107350860-107350927,107360889	S	92	99	55.04	26.87	92.59	65.72	PanAS
SUN2	HsaEX0062911	chr22:39150647-39150711	65	chr22:39151768,39150647-39150711,39148670	S	92	99	41.52	4.1	68.72	64.62	PanAS
ASCC2	HsaEX0006234	chr22:30230478-30230539	62	chr22:30234167,30230478-30230539,30228331	C1	92	99	50.32	8.25	89.44	81.19	PanAS
HERC2	HsaEX0029737	chr15:28525214-28525433	220	chr15:28538034,28525214-28525433,28520151	C2	92	99	61.02	13.51	91.82	78.31	PanAS
FBXO38	HsaEX0025310	chr5:147807385-147807510	126	chr5:147807285,147806776+147807385-147807510,147812987	C2	92	99	39.8	6.86	69.48	62.62	PanAS
METTL6	HsaEX0038930	chr3:15457005-15457090	86	chr3:15457279,15457005-15457090,15455669	C2	92	99	50.72	0	87.27	87.27	PanAS
C9orf95	HsaEX0011779	chr9:77693242-77693498	257	chr9:77698003,77693242-77693498+77693527,77692496	C1	91	99	36.58	8.67	68.04	59.37	PanAS
C14orf135	HsaEX0009383	chr14:60574304-60575045	742	chr14:60559137,60574304-60575045,60581418	S	91	99	51.65	7.04	85.59	78.55	PanAS
EYA3	HsaEX0023589	chr1:28354300-28354437	138	chr1:28362055,28354300-28354437,28343750	S	91	99	33.79	1.65	85.95	84.3	PanAS
MTMR2	HsaEX0040599	chr11:95647406-95647476	71	chr11:95657039,95647406-95647476,95621425	C1	91	99	49.81	10.71	90.48	79.77	PanAS
EBPL	HsaEX0021474	chr13:50243913-50243982	70	chr13:50265390,50243913-50243982,50242705	C2	91	99	48.67	5.65	87.2	81.55	PanAS
TMEM50B	HsaEX0065861	chr21:34809190-34809299	110	chr21:34811521,34809190-34809299+34809391,34805109	S	90	99	39.3	9.09	84.91	75.82	PanAS
HSF2	HsaEX0030583	chr6:122749048-122749101	54	chr6:122744831,122749048-122749101,122752575	S	90	99	31.48	0	80.52	80.52	PanAS
GAPVD1	HsaEX0027019	chr9:128057737-128057853	117	chr9:128024238,128057737-128057853,128061169	C2	90	99	23.9	0	49.25	49.25	PanAS
C14orf104	HsaEX0009355	chr14:50094730-50094873	144	chr14:50100005,50094730-50094873,50092766	S	90	99	60.72	9.28	89.86	80.58	PanAS
HMBOX1	HsaEX0030156	chr8:28906807-28906911	105	chr8:28906565,28906807-28906911,28908535	C1	89	99	40.87	4.62	87.3	82.68	PanAS
RPP38	HsaEX0055540	chr10:15144217-15144335	119	chr10:15139408,15144217-15144335,15145304	C2	89	99	47.45	23.98	90.86	66.88	PanAS
CRYBB2P1	HsaEX0017368	chr22:25849283-25849401	119	chr22:25844251,25849283-25849401,25851679	C1	88	99	44.76	5.88	83.61	77.73	PanAS
KDM6A	HsaEX0033365	chrX:44919267-44919401	135	chrX:44918711,44919267-44919401,44920569	C2	88	99	53.18	3.29	86.19	82.9	PanAS
FAM189B	HsaEX0024289	chr1:155223650-155223769	120	chr1:155223875,155223650-155223769,155223523	C2	88	99	54.71	6.73	88	81.27	PanAS
SLC35A3	HsaEX0059384	chr1:100440527-100440625	99	chr1:100435718+100436200,100440527-100440625,100459093	S	87	99	31	6.81	65.02	58.21	PanAS
TMEM50B	HsaEX0065862	chr21:34819325-34819447	123	chr21:34821089,34819325-34819447,34811604	S	87	99	29.73	3.83	65.56	61.73	PanAS
C16orf68	HsaEX0009687	chr16:8728896-8728936	41	chr16:8722967,8728896-8728936,8729025+8729073	S	87	99	45.77	10.09	90.14	80.05	PanAS
FBRSL1	HsaEX0025141	chr12:133147909-133148110	202	chr12:133147126,133147893+133147909-133148110,133148874	C2	87	99	49.6	10.46	90.85	80.39	PanAS
GALK2	HsaEX0026860	chr15:49453966-49454058	93	chr15:49448213,49453929+49453937+49453961+49453966-49454058,49493359	S	87	99	41.58	5.05	70.32	65.27	PanAS
UBOX5	HsaEX0068917	chr20:3129287-3129906	620	chr20:3140412,3129287-3129906+3129943,3104052	S	87	99	46.13	5.88	74.21	68.33	PanAS
SLC7A6	HsaEX0059981	chr16:68307721-68307807	87	chr16:68300624,68307698+68307721-68307807,68308594	C1	87	99	31.26	5.45	55.13	49.68	PanAS
TUSC3	HsaEX0068405	chr8:15615300-15615364	65	chr8:15605974,15609506+15615300-15615364,15621712	C1	87	99	43.2	9.11	74.13	65.02	PanAS
2002-03-01	HsaEX0037867	chr19:8483421-8483691	271	chr19:8478304+8478678,8483421-8483691,8486673	S	86	99	54.03	24.36	93.71	69.35	PanAS
MAPK8	HsaEX0037778	chr10:49516138-49516331	194	chr10:49514864,49516138-49516331,49609655	C1	85	99	53.15	9.09	82.22	73.13	PanAS
PIGN	HsaEX0047442	chr18:59829486-59829562	77	chr18:59854077+59854256,59829486-59829562+59829745,59828459+59828618	C2	85	99	32.94	7.96	57.53	49.57	PanAS
THSD1P1	HsaEX0064900	chr13:52758111-52758249	139	chr13:52760818,52758111-52758249,52754789	S	84	99	58.15	3.23	90	86.77	PanAS
CSAD	HsaEX0017409	chr12:53554911-53554975	65	chr12:53555057,53554911-53554975,53554628	S	84	99	58.08	25	99.36	74.36	PanAS
USP53	HsaEX0069978	chr4:120156445-120156566	122	chr4:120138828,120156445-120156566,120160373	C1	84	99	29.41	4.55	57.89	53.34	PanAS
TEAD2	HsaEX0064372	chr19:49859216-49859227	12	chr19:49860509,49859216-49859227,49858676	MIC	84	99	44.42	9.79	80.82	71.03	PanAS
AC012621.2	HsaEX0001082	chr16:19559837-19559922	86	chr16:19559336,19559837-19559922,19562518	S	83	99	42.67	12.41	93.2	80.79	PanAS
GAPVD1	HsaEX0027017	chr9:128031215-128031263	49	chr9:128024238,128031215-128031263,128061169	C2	83	99	34.71	0	70.77	70.77	PanAS
FAM195A	HsaEX0024349	chr16:696472-696604	133	chr16:692249,696472-696604+696608,697417	S	83	99	37.52	8.18	84.09	75.91	PanAS
EFEMP1	HsaEX0021709	chr2:56150034-56150074	41	chr2:56150846,56150034-56150074,56149582	S	83	99	32.43	10.9	94.8	83.9	PanAS
ARRB2	HsaEX0006045	chr17:4618308-4618338	31	chr17:4614039,4618308-4618338,4619268	S	83	99	53.2	6.92	82.38	75.46	PanAS
BDP1	HsaEX0007978	chr5:70858602-70858722	121	chr5:70858347,70858602-70858722,70860581	S	83	99	33.81	10.56	95.09	84.53	PanAS
PWWP2A	HsaEX0051372	chr5:159507658-159507777	120	chr5:159520108,159507658-159507777,159505175	C1	83	99	57.38	26.67	93.55	66.88	PanAS
NPHP3	HsaEX0043533	chr3:132418197-132418290	94	chr3:132418762,132418197-132418290+132418294,132416206	S	82	99	52.2	17.24	93.04	75.8	PanAS
N6AMT1	HsaEX0041442	chr21:30252192-30252275	84	chr21:30254482,30252192-30252275,30250655	S	82	99	66.53	34.83	97.11	62.28	PanAS
AC103810.4	HsaEX0001516	chr17:62810981-62811166	186	chr17:62817885,62810981-62811166+62811345,62801218	S	82	99	32.71	4.68	75.21	70.53	PanAS
STAU2	HsaEX0062378	chr8:74439926-74440039	114	chr8:74464247,74439926-74440039,74334937	S	81	99	36.08	3.43	73.46	70.03	PanAS
C11orf57	HsaEX0009018	chr11:111945611-111945640	30	chr11:111945082,111945336+111945611-111945640,111946291	S	81	99	43.4	9.43	69.7	60.27	PanAS
MICAL2	HsaEX0039212	chr11:12270731-12270793	63	chr11:12265659,12270731-12270793,12278332	C3	81	99	32.98	6.42	71.73	65.31	PanAS
ARHGAP12	HsaEX0005406	chr10:32128233-32128247	15	chr10:32132389,32128233-32128247,32120728	C2	81	99	56.42	12.85	91.8	78.95	PanAS
ZNF44	HsaEX0073698	chr19:12383302-12384878	1577	chr19:12405507,12383302-12384878,12361183	C3	81	99	32.32	9.29	77.1	67.81	PanAS
PLAGL1	HsaEX0048012	chr6:144269122-144269597	476	chr6:144281606+144281610,144269122-144269597,144263800	S	80	99	63	19.11	94.87	75.76	PanAS
ARID5A	HsaEX0005817	chr2:97215058-97215196	139	chr2:97213254,97215058-97215196,97215490	S	80	99	62.72	27.16	93.94	66.78	PanAS
EXD2	HsaEX0023394	chr14:69670634-69670717	84	chr14:69658308,69670634-69670717,69676141	C1	80	99	68.27	32.6	94.66	62.06	PanAS
SAMD4A	HsaEX0056160	chr14:55203742-55204005	264	chr14:55169298,55203742-55204005,55215533	S	79	99	47.82	20.63	91.13	70.5	PanAS
MPHOSPH9	HsaEX0039931	chr12:123687797-123687922	126	chr12:123694603,123687797-123687922,123687631	S	79	99	49.49	16.4	90.24	73.84	PanAS
ZNF83	HsaEX0074434	chr19:53119971-53120068	98	chr19:53122189,53119971-53120068+53120088+53120094+53120128,53118050	C1	79	99	54.81	18.14	92.81	74.67	PanAS
ZNF266	HsaEX0073293	chr19:9544369-9544459	91	chr19:9545784,9544344+9544369-9544459+9544462,9530894	C3	79	99	45.36	7.12	77.01	69.89	PanAS
KIAA0368	HsaEX0033597	chr9:114235177-114235280	104	chr9:114246265+114246396,114235177-114235280,114213835	S	78	99	36.63	5.84	86.15	80.31	PanAS
PHLDB2	HsaEX0047185	chr3:111651116-111651244	129	chr3:111639266,111651116-111651244,111658322	S	78	99	58.27	4.76	83.08	78.32	PanAS
TPD52L1	HsaEX0066661	chr6:125574863-125574901	39	chr6:125569529,125574863-125574901,125583980	C1	77	99	47.12	16.6	90.6	74	PanAS
NEIL2	HsaEX0042457	chr8:11627683-11627844	162	chr8:11627300,11627683-11627844,11628955+11629020	C1	77	99	35.03	8.74	78.72	69.98	PanAS
RP11-429G19.2	HsaEX0054813	chr10:97657315-97657436	122	chr10:97664587,97657285+97657315-97657436,97636417	C2	77	99	31.09	9.14	88.47	79.33	PanAS
PARP11	HsaEX0045566	chr12:3938076-3938196	121	chr12:3939056,3938076-3938196,3935399	S	76	99	51.26	24.27	100	75.73	PanAS
AHI1	HsaEX0003245	chr6:135818326-135818387	62	chr6:135818721,135818326-135818387,135813429	C1	76	99	54.06	26.15	92.5	66.35	PanAS
ZNF37A	HsaEX0073529	chr10:38383859-38384152	294	chr10:38383343+38383418,38383859-38384152,38384286+38384466	S	75	99	45.98	2.26	78.57	76.31	PanAS
BAZ2A	HsaEX0007722	chr12:57024560-57024649	90	chr12:57029966,57024560-57024649,57011316	S	75	99	65.19	20	100	80	PanAS
ATP5S	HsaEX0006938	chr14:50781309-50781344	36	chr14:50779107,50781309-50781344,50788201	S	75	99	34.74	7.63	64.44	56.81	PanAS
ZFYVE20	HsaEX0072739	chr3:15139626-15139781	156	chr3:15140542,15139626-15139781,15138217	S	75	99	59.32	2.97	89.45	86.48	PanAS
ZNF3	HsaEX0073378	chr7:99677163-99677279	117	chr7:99679258,99677159+99677163-99677279,99675056	C1	75	99	66.4	16.1	91.94	75.84	PanAS
MTRF1	HsaEX0040720	chr13:41835887-41835961	75	chr13:41837621+41837703,41835719+41835792+41835827+41835835+41835887-41835961,41835011+41835051	C2	74	99	45.53	9.72	84.74	75.02	PanAS
NUDT7	HsaEX0044188	chr16:77769725-77769883	159	chr16:77759481,77769725-77769883,77775479	C2	74	99	44.82	5.56	84.21	78.65	PanAS
TTC8	HsaEX0068026	chr14:89307769-89307858	90	chr14:89307540,89307769-89307858,89310150	S	74	99	64.52	24.43	95.7	71.27	PanAS
PELI3	HsaEX0046569	chr11:66236304-66236375	72	chr11:66235740+66235751,66236304-66236375,66238713+66238819	S	74	99	57.63	13.27	91.49	78.22	PanAS
ZNF140	HsaEX0073057	chr12:133677573-133677639	67	chr12:133660147,133677573-133677639,133682096+133682211	S	74	99	36.88	8.08	78.31	70.23	PanAS
C1orf89	HsaEX0010346	chr1:16559388-16559512	125	chr1:16560107,16559388-16559512,16559141	S	74	99	50.61	3.23	84	80.77	PanAS
MEIS2	HsaEX0038799	chr15:37186918-37187013	96	chr15:37187352,37186918-37187013,37184660	S	73	99	59.06	0	89	89	PanAS
ZNF160	HsaEX0073090	chr19:53594666-53594750	85	chr19:53594890,53594666-53594750+53594782+53594806,53589570+53589574	S	73	99	49.1	9.43	83.14	73.71	PanAS
REPS2	HsaEX0053065	chrX:17095394-17095530	137	chrX:17092282,17095394-17095530,17121841	C3	72	99	38.55	7.93	89.67	81.74	PanAS
CDC14B	HsaEX0013986	chr9:99271955-99272071	117	chr9:99284788,99271955-99272071,99266071	C2	72	99	50.98	10.74	91.78	81.04	PanAS
RAD51L3	HsaEX0051917	chr17:33434007-33434141	135	chr17:33434385,33434007-33434141,33433500	C1	72	99	62.72	23.11	95.05	71.94	PanAS
PTPN13	HsaEX0050971	chr4:87674162-87674218	57	chr4:87672277,87674162-87674218,87679413	S	71	99	39.37	0	64.74	64.74	PanAS
KIAA0226	HsaEX0033512	chr3:197444848-197445001	154	chr3:197463526,197444848-197445001,197432046	S	71	99	60.59	24.48	94.54	70.06	PanAS
RAD51L3	HsaEX0051914	chr17:33445520-33445638	119	chr17:33446130,33445520-33445638,33434466	C2	71	99	45.06	17.25	100	82.75	PanAS
ZNF468	HsaEX0073754	chr19:53348432-53348549	118	chr19:53352340,53348432-53348549,53345404	S	71	99	40.07	6.65	88	81.35	PanAS
POLL	HsaEX0048978	chr10:103344635-103344676	42	chr10:103345073,103344635-103344676,103342648	C2	70	99	56.26	17.02	90.51	73.49	PanAS
GINS3	HsaEX0027486	chr16:58437002-58437235	234	chr16:58426691+58426697,58437002-58437235+58437239,58438403	S	70	99	67.11	15.25	92.5	77.25	PanAS
RP11-421L21.3	HsaEX0054783	chr1:101542919-101543064	146	chr1:101491617,101542919-101543064,101552408	C3	70	99	54.05	15.07	91.14	76.07	PanAS
TDP1	HsaEX0064298	chr14:90422922-90423144	223	chr14:90422314,90422922-90423144,90429452	S	70	99	40.41	3.57	85.36	81.79	PanAS
ZSCAN21	HsaEX0074565	chr7:99649101-99649233	133	chr7:99647464,99649101-99649233,99654534	C1	70	99	32.6	8.24	60	51.76	PanAS
LRRC37B	HsaEX0036591	chr17:30347716-30347822	107	chr17:30335151,30347716-30347822,30351730	C3	69	99	58.27	12.5	92.86	80.36	PanAS
SEMA3F	HsaEX0057075	chr3:50212529-50212621	93	chr3:50211783,50212529-50212621,50214201	S	68	99	42.93	9.09	75.33	66.24	PanAS
SH3D20	HsaEX0057994	chr17:43481635-43481700	66	chr17:43481811,43481635-43481700,43481462	S	68	99	50.05	11.11	96.03	84.92	PanAS
DCLRE1C	HsaEX0018707	chr10:14989524-14989608	85	chr10:14991035,14989524-14989608,14987188	C1	68	99	30.77	5.47	67.27	61.8	PanAS
ZNF37B	HsaEX0073531	chr10:43046848-43046910	63	chr10:43047021+43047025,43046848-43046910,43046063	S	68	99	36.07	6.49	72.8	66.31	PanAS
C19orf54	HsaEX0010002	chr19:41249972-41250101	130	chr19:41250464,41249972-41250101,41249880+41249886	S	67	99	58	28.36	91.49	63.13	PanAS
ELN	HsaEX0022192	chr7:73471970-73472026	57	chr7:73471043,73471970-73472026,73474216	S	67	99	46.41	3.03	76.45	73.42	PanAS
LLGL2	HsaEX0035978	chr17:73570534-73570576	43	chr17:73570341,73570534-73570576,73570691	S	67	99	65.42	27.74	93.04	65.3	PanAS
SEC31B	HsaEX0056969	chr10:102259867-102259916	50	chr10:102262011,102259867-102259916,102259355	S	67	99	39.71	1.3	72.22	70.92	PanAS
SHF	HsaEX0058178	chr15:45464345-45464516	172	chr15:45467417,45464345-45464516,45460331	C3	67	99	66.88	45.48	91.1	45.62	PanAS
TMEM45A	HsaEX0065826	chr3:100238377-100238452	76	chr3:100211772,100238306+100238377-100238452,100274053	C1	67	99	47.75	27.82	99.04	71.22	PanAS
ZFP62	HsaEX0072669	chr5:180287528-180287654	127	chr5:180288109+180288215+180288219,180287528-180287654+180287679,180278493	C1	67	99	44.57	12.91	93.88	80.97	PanAS
ZNF44	HsaEX0073697	chr19:12385788-12385848	61	chr19:12405507,12385785+12385788-12385848,12361183	C3	67	99	39.1	9.74	73.84	64.1	PanAS
GTF2I	HsaEX0028969	chr7:74133198-74133260	63	chr7:74131270,74133180+74133198-74133260,74143124	S	108	98	32.42	8.94	70.75	61.81	PanAS
FIP1L1	HsaEX0025814	chr4:54280782-54280889	108	chr4:54266006,54280782-54280889,54292039	S	108	98	65.8	43.56	100	56.44	PanAS
DGUOK	HsaEX0019478	chr2:74177754-74177859	106	chr2:74174015+74174033,74177712+74177728+74177754-74177859,74185246+74185273	C2	107	98	42.94	6.67	90.69	84.02	PanAS
MAPKAP1	HsaEX0037808	chr9:128268589-128268696	108	chr9:128305338,128268589-128268696,128246862	S	107	98	64.13	38.9	92.79	53.89	PanAS
RPAIN	HsaEX0055408	chr17:5329296-5329391	96	chr17:5326149,5329291+5329296-5329391+5329402,5335862	C2	106	98	52.17	8.33	100	91.67	PanAS
MEF2A	HsaEX0038694	chr15:100211528-100211659	132	chr15:100185969,100211528-100211659,100214598	C3	105	98	67.52	41.96	100	58.04	PanAS
DCAF6	HsaEX0018644	chr1:167992226-167992285	60	chr1:167974031,167992226-167992285,168007609	C1	105	98	41.68	18.02	94.4	76.38	PanAS
TRIP12	HsaEX0067262	chr2:230725122-230725247	126	chr2:230744698,230725122-230725247,230724287+230724290	S	105	98	49.88	18.52	97.75	79.23	PanAS
CHCHD7	HsaEX0015002	chr8:57125321-57125448	128	chr8:57124396,57125321-57125448+57125468,57127157	S	104	98	36.35	6.34	79.35	73.01	PanAS
KAT5	HsaEX0032879	chr11:65480819-65480974	156	chr11:65480526+65480529,65480819-65480974,65481064	S	104	98	33.99	6.25	66.86	60.61	PanAS
MAP4K4	HsaEX0037675	chr2:102477287-102477448	162	chr2:102476326,102477287-102477448,102481392	C1	104	98	26.58	6.49	83.64	77.15	PanAS
ANAPC16	HsaEX0004047	chr10:73979812-73980137	326	chr10:73975830+73975896+73975990,73979812-73980137,73983646+73983651	C1	104	98	25.98	3.13	60.11	56.98	PanAS
FOXJ3	HsaEX0026226	chr1:42671433-42671534	102	chr1:42693554,42671433-42671534,42664901	S	104	98	70.12	34.5	95.28	60.78	PanAS
NSUN5P1	HsaEX0043968	chr7:75042067-75042210	144	chr7:75041042,75042067-75042210,75044163	S	104	98	47.75	4.63	83.51	78.88	PanAS
PI4KA	HsaEX0047290	chr22:21083601-21083794	194	chr22:21087259,21083601-21083794,21073110	C3	104	98	52.3	8.11	93.26	85.15	PanAS
PI4KA	HsaEX0047291	chr22:21082062-21082152	91	chr22:21087259,21082062-21082152,21073110	C3	104	98	52.09	7.2	93.86	86.66	PanAS
PI4KA	HsaEX0047292	chr22:21081518-21081685	168	chr22:21087259,21081518-21081685,21073110	C3	104	98	48.62	5.67	92.93	87.26	PanAS
PI4KA	HsaEX0047293	chr22:21080776-21080829	54	chr22:21087259,21080776-21080829,21073110	C3	103	98	46.24	7.57	91.12	83.55	PanAS
LETMD1	HsaEX0035658	chr12:51449927-51450028	102	chr12:51449804,51449927-51450028,51450133	C2	103	98	62.38	34.44	98.18	63.74	PanAS
C16orf13	HsaEX0009601	chr16:684889-684956	68	chr16:685281,684889-684956,684797	C1	103	98	67.91	34.66	100	65.34	PanAS
PPP2R5C	HsaEX0049730	chr14:102384168-102384284	117	chr14:102378810,102384168-102384284,102391478	S	102	98	37.63	2.77	78.56	75.79	PanAS
HPS1	HsaEX0030410	chr10:100189548-100189646	99	chr10:100190328,100189548-100189646,100189399	S	101	98	64.12	15.71	93.22	77.51	PanAS
MAP4K3	HsaEX0037664	chr2:39535084-39535146	63	chr2:39536602,39535084-39535146,39526942	S	101	98	38.23	7.67	71.81	64.14	PanAS
ATXN2	HsaEX0007260	chr12:111902466-111902519	54	chr12:111907912,111902466-111902519,111895163	S	101	98	49.74	4.39	100	95.61	PanAS
USP33	HsaEX0069762	chr1:78211106-78211284	179	chr1:78225328,78211106-78211284,78207433	S	100	98	33.1	6.82	74.2	67.38	PanAS
CREB1	HsaEX0017167	chr2:208425843-208425884	42	chr2:208425096,208425843-208425884,208432187	S	100	98	25.75	5.12	59.29	54.17	PanAS
MYCBP2	HsaEX0040931	chr13:77692475-77692630	156	chr13:77695494+77695508,77692475-77692630+77692654,77673148	S	99	98	31.21	2.37	73.91	71.54	PanAS
RBM42	HsaEX0052721	chr19:36123838-36123903	66	chr19:36122307,36123838-36123903,36123979+36124000+36124003	S	99	98	62.48	25.43	96.37	70.94	PanAS
TARS2	HsaEX0063668	chr1:150469286-150469384	99	chr1:150464965,150469286-150469384,150470006	C2	99	98	65.72	33.29	100	66.71	PanAS
SETD5	HsaEX0057500	chr3:9475054-9475246	193	chr3:9471735,9475054-9475246,9475529	C2	99	98	37.45	0	80.39	80.39	PanAS
GS1-124K5.12	HsaEX0028790	chr7:66041742-66041919	178	chr7:66057244,66041742-66041919,66038537	S	99	98	51.34	5.14	96.67	91.53	PanAS
PISD	HsaEX0047732	chr22:32019670-32019835	166	chr22:32044087,32019670-32019835,32017808+32017871	C2	99	98	46.08	10.64	100	89.36	PanAS
NBPF3	HsaEX0041881	chr1:21768733-21768851	119	chr1:21766841,21768733-21768851,21771441	C2	99	98	37.49	2.43	74.76	72.33	PanAS
ZNF384	HsaEX0073547	chr12:6787829-6787876	48	chr12:6788112,6787829-6787876,6787509+6787530+6787626	S	98	98	68.84	35.96	95	59.04	PanAS
PCM1	HsaEX0045923	chr8:17797551-17797667	117	chr8:17797370,17797551-17797667,17804695	S	98	98	32.44	2.61	59.37	56.76	PanAS
UPP1	HsaEX0069469	chr7:48139267-48139384	118	chr7:48134424,48139267-48139384,48146470	C2	98	98	40.31	5	100	95	PanAS
TRMU	HsaEX0067317	chr22:46739159-46739265	107	chr22:46733841,46739159-46739265,46742319	S	97	98	63.28	15	96.67	81.67	PanAS
PCNX	HsaEX0045971	chr14:71455287-71455416	130	chr14:71445365,71455284+71455287-71455416,71476351	C2	97	98	55.53	7.84	93.22	85.38	PanAS
MTERFD2	HsaEX0040439	chr2:242038811-242039309	499	chr2:242041555+242041668,242038811-242039309,242036842	C1	97	98	67.23	38.19	91.08	52.89	PanAS
ANXA11	HsaEX0004725	chr10:81935863-81935911	49	chr10:81965099,81935863-81935911,81932625	S	97	98	70.77	34.83	93.8	58.97	PanAS
SLC35B3	HsaEX0059403	chr6:8434618-8434663	46	chr6:8435175+8435310+8435442+8435461+8435576+8435672,8434618-8434663,8430390	S	97	98	59.41	10.57	92.18	81.61	PanAS
CRAT	HsaEX0017132	chr9:131871458-131871556	99	chr9:131872762,131871458-131871556,131870356	C1	97	98	46.95	6.22	82.79	76.57	PanAS
C12orf29	HsaEX0009151	chr12:88433925-88434042	118	chr12:88429515,88433925-88434042,88436602	S	96	98	68.22	30.3	95.65	65.35	PanAS
ELF2	HsaEX0022116	chr4:140037803-140037905	103	chr4:140046318,140037803-140037905+140037961,139994721	S	96	98	29.9	7.96	75.96	68	PanAS
PPP6R3	HsaEX0049817	chr11:68272613-68272717	105	chr11:68228295,68272613-68272717+68272739,68286969	C1	96	98	36.01	6.68	69.9	63.22	PanAS
UBE3A	HsaEX0068828	chr15:25657055-25657118	64	chr15:25683636,25657055-25657118,25650649	C3	96	98	60.53	21.06	96.51	75.45	PanAS
NFX1	HsaEX0042807	chr9:33347661-33347940	280	chr9:33347115,33347661-33347940,33351558	S	96	98	36.64	3.12	70.47	67.35	PanAS
PPP2R3C	HsaEX0049692	chr14:35585816-35585943	128	chr14:35591108,35585816-35585943,35579835	S	96	98	68.29	17.19	98.15	80.96	PanAS
PPIL3	HsaEX0049437	chr2:201747065-201747158	94	chr2:201749985,201747065-201747158,201746211	C2	96	98	75.43	42.8	92.18	49.38	PanAS
C20orf7	HsaEX0010510	chr20:13795064-13795161	98	chr20:13789548,13795064-13795161,13797109	S	95	98	34.27	4.55	80.28	75.73	PanAS
RPP14	HsaEX0055530	chr3:58296036-58296133	98	chr3:58292144+58292378,58296017+58296036-58296133,58296234	S	95	98	59.21	20.59	91.01	70.42	PanAS
AC136007.2	HsaEX0001620	chr2:70286775-70286812	38	chr2:70312679,70286775-70286812,70278437	C3	95	98	33.81	8.84	59.14	50.3	PanAS
HMGXB4	HsaEX0030241	chr22:35659975-35660089	115	chr22:35659867,35659975-35660089,35660641	S	94	98	34.16	8.15	77.65	69.5	PanAS
AMBRA1	HsaEX0003916	chr11:46534277-46534363	87	chr11:46563495,46534277-46534363,46529920	C1	94	98	50.1	9.52	98.08	88.56	PanAS
DHX30	HsaEX0019586	chr3:47866257-47866737	481	chr3:47860754,47866257-47866737,47868837+47868889	C2	94	98	37.08	1.93	78.24	76.31	PanAS
CYTSA	HsaEX0018373	chr22:24672668-24672771	104	chr22:24666892+24666951,24672668-24672771,24698163	S	93	98	40.95	5.02	90.82	85.8	PanAS
CARD8	HsaEX0012451	chr19:48722128-48722269	142	chr19:48724987,48722128-48722269,48718641	S	93	98	74.81	51.72	93.62	41.9	PanAS
DCUN1D4	HsaEX0018797	chr4:52777236-52777340	105	chr4:52765544,52777236-52777340,52779456	S	93	98	72.35	49.4	91.8	42.4	PanAS
SMAD2	HsaEX0060210	chr18:45456732-45456817	86	chr18:45457167+45457171,45456623+45456732-45456817,45423180	C1	93	98	63.52	34.37	92.03	57.66	PanAS
GUSBL1	HsaEX0029121	chr6:26894517-26894550	34	chr6:26924168,26894517-26894550,26893054	S	93	98	71.75	34.79	97.22	62.43	PanAS
FBXO44	HsaEX0025341	chr1:11718590-11718685	96	chr1:11718421+11718450,11718590-11718685,11718793	S	92	98	57.76	16.47	100	83.53	PanAS
GEMIN7	HsaEX0027311	chr19:45583165-45583287	123	chr19:45582537+45582635,45583165-45583287,45593365	S	92	98	59.29	26.81	100	73.19	PanAS
BRD1	HsaEX0008400	chr22:50181225-50181535	311	chr22:50187682,50181225-50181535,50181142+50181170	C1	92	98	28.21	6.85	70.93	64.08	PanAS
C17orf80	HsaEX0009826	chr17:71238383-71238490	108	chr17:71233134,71238383-71238490,71239035	S	92	98	64.15	25.36	97.39	72.03	PanAS
C14orf159	HsaEX0009427	chr14:91611565-91611657	93	chr14:91580627,91611565-91611657,91614125	C3	92	98	41.42	9.42	100	90.58	PanAS
HIST1H2AC	HsaEX0030040	chr6:26127926-26127989	64	chr6:26124977,26127926-26127989,26138282	S	92	98	40.89	5.88	81.03	75.15	PanAS
PATZ1	HsaEX0045688	chr22:31724773-31724845	73	chr22:31731678,31724773-31724845+31724910,31723295	S	91	98	34.94	8.66	74.29	65.63	PanAS
DIS3	HsaEX0019776	chr13:73355427-73355494	68	chr13:73355743,73355427-73355494,73352518	C3	91	98	39.65	8.3	87.5	79.2	PanAS
TMEM175	HsaEX0065591	chr4:941904-941942	39	chr4:926328,941904-941942,944209+944212	C3	91	98	63.46	24.32	92.13	67.81	PanAS
P4HA2	HsaEX0045119	chr5:131534014-131534073	60	chr5:131534572,131534014-131534073,131531173	C3	91	98	73.03	6.22	90.89	84.67	PanAS
MECP2	HsaEX0038490	chrX:153357642-153357765	124	chrX:153363061,153357642-153357765,153298008	S	91	98	63.58	19.54	100	80.46	PanAS
BAZ2B	HsaEX0007738	chr2:160284452-160284553	102	chr2:160284822,160284452-160284553,160269056	S	90	98	62.74	38.05	100	61.95	PanAS
BCOR	HsaEX0007938	chrX:39930890-39930943	54	chrX:39931602,39930890-39930943,39930412	S	90	98	56.73	19.86	100	80.14	PanAS
SUOX	HsaEX0062919	chr12:56391399-56391507	109	chr12:56391123+56391321,56391399-56391507,56395996	C1	90	98	69	37.41	90.79	53.38	PanAS
FAM13B	HsaEX0024018	chr5:137354644-137354835	192	chr5:137356720,137354644-137354835,137354203	C1	89	98	68.44	20.59	90.8	70.21	PanAS
CARD8	HsaEX0012454	chr19:48741640-48741783	144	chr19:48744219,48741549+48741640-48741783+48741789,48737800	S	89	98	65.73	11.11	100	88.89	PanAS
RAB11FIP1	HsaEX0051551	chr8:37728796-37730697	1902	chr8:37732033,37728796-37730697,37728046	S	89	98	24.44	5.26	49.71	44.45	PanAS
MPDZ	HsaEX0039907	chr9:13147547-13147657	111	chr9:13150510,13147547-13147657,13140148	C1	88	98	50.57	5.36	94.12	88.76	PanAS
PACRGL	HsaEX0045172	chr4:20711306-20711396	91	chr4:20706437,20711306-20711396,20714411	C3	88	98	56.12	6.02	91.16	85.14	PanAS
SCMH1	HsaEX0056511	chr1:41618271-41618413	143	chr1:41625397,41618271-41618413,41617356	C2	88	98	38.64	5.46	100	94.54	PanAS
MKL1	HsaEX0039363	chr22:40990678-40990739	62	chr22:41032482,40990678-40990739,40948371	C1	88	98	70.29	12.96	92.86	79.9	PanAS
DYRK1B	HsaEX0021342	chr19:40317592-40317627	36	chr19:40317925,40317592-40317627,40317507	S	87	98	31.98	4.09	63.74	59.65	PanAS
POMT1	HsaEX0049154	chr9:134379576-134379727	152	chr9:134378460+134378700+134378752,134379576-134379727+134380036,134381501	C1	87	98	64.72	19.05	97.26	78.21	PanAS
PRPF39	HsaEX0050366	chr14:45565852-45565961	110	chr14:45565431,45565799+45565852-45565961,45566090	C1	87	98	40.14	8.2	80.49	72.29	PanAS
AC069513.3	HsaEX0001303	chr3:195423232-195423460	229	chr3:195416309,195423232-195423460,195425901	C2	87	98	45.88	11.2	94.88	83.68	PanAS
PIKFYVE	HsaEX0047629	chr2:209142261-209142432	172	chr2:209141554,209142261-209142432,209150450	C1	85	98	65.38	31.43	100	68.57	PanAS
TMEM25	HsaEX0065756	chr11:118404135-118404266	132	chr11:118403922,118404135-118404266,118404572	S	85	98	64.93	0	91.79	91.79	PanAS
WWP2	HsaEX0071694	chr16:69810092-69810144	53	chr16:69796290+69796294,69810092-69810144,69820899	C1	85	98	30.56	9.25	76.99	67.74	PanAS
LSR	HsaEX0036865	chr19:35753449-35753595	147	chr19:35749967,35753449-35753595,35757262	C1	84	98	65.41	10.46	97.12	86.66	PanAS
HPS5	HsaEX0030448	chr11:18339298-18339454	157	chr11:18343493+18343624+18343680,18339298-18339454,18333571	C1	84	98	52.73	7.69	95	87.31	PanAS
KLHL20	HsaEX0034793	chr1:173684662-173684793	132	chr1:173684217,173684662-173684793,173685142	S	84	98	33.18	0	79.35	79.35	PanAS
C9orf21	HsaEX0011644	chr9:99408175-99408216	42	chr9:99413672,99408175-99408216+99408306,99404097+99404168	S	83	98	63.64	4.6	82.36	77.76	PanAS
MKL2	HsaEX0039377	chr16:14186578-14186739	162	chr16:14173211,14186578-14186739,14234401	S	83	98	23.59	7.32	55.1	47.78	PanAS
C8orf58	HsaEX0011553	chr8:22460074-22460156	83	chr8:22459825,22460050+22460074-22460156,22460708	S	83	98	64.31	19.07	94.25	75.18	PanAS
GTDC1	HsaEX0028910	chr2:144714762-144714906	145	chr2:144728220,144714762-144714906,144710410	C1	83	98	71.54	41.85	100	58.15	PanAS
TCF7L2	HsaEX0064195	chr10:114918426-114918476	51	chr10:114917828+114917832,114918426-114918476,114925314+114925317	C3	83	98	36.17	7.95	65.76	57.81	PanAS
SETMAR	HsaEX0057539	chr3:4355351-4355445	95	chr3:4345210+4345552,4355331+4355351-4355445,4357896	C1	83	98	63.09	20	96.99	76.99	PanAS
TOR1AIP2	HsaEX0066548	chr1:179825193-179825305	113	chr1:179834571,179825193-179825305,179821946	C2	83	98	49.75	3.46	82.94	79.48	PanAS
ADARB1	HsaEX0002635	chr21:46604389-46604508	120	chr21:46603425,46604389-46604508,46604838	S	82	98	60.98	11.48	96.49	85.01	PanAS
ZNF10	HsaEX0072991	chr12:133770014-133770119	106	chr12:133768589,133770014-133770119,133778730	S	82	98	54.92	6.42	92.41	85.99	PanAS
ECHDC2	HsaEX0021508	chr1:53379567-53379767	201	chr1:53387070+53387155+53387225,53379567-53379767,53377462+53377693	C1	82	98	40.27	9.01	92.55	83.54	PanAS
AC073995.2	HsaEX0001319	chr2:96517874-96517944	71	chr2:96519457,96517874-96517944,96517535	S	82	98	58.64	18.81	100	81.19	PanAS
AC005840.2	HsaEX0000883	chr12:6559507-6559874	368	chr12:6560529+6560635,6559507-6559874,6557903+6557923	C2	81	98	29.92	3.48	56.23	52.75	PanAS
MBTD1	HsaEX0038151	chr17:49336504-49336567	64	chr17:49337196+49337481,49336504-49336567,49302544+49302570	S	80	98	68.35	24.59	95.74	71.15	PanAS
NFAT5	HsaEX0042680	chr16:69602398-69602451	54	chr16:69600277,69602398-69602451,69660306	S	66	98	34.39	6.38	67.8	61.42	PanAS
ZDBF2	HsaEX0072420	chr2:207156738-207156840	103	chr2:207146633,207156705+207156735+207156738-207156840,207161970	S	66	98	40.88	8.2	73.77	65.57	PanAS
RAGE	HsaEX0051998	chr14:102698082-102698158	77	chr14:102698872,102698044+102698082-102698158,102695988+102695994	S	66	98	64.46	33.33	98.26	64.93	PanAS
RP4-717I23.3	HsaEX0055295	chr1:93777051-93777165	115	chr1:93790192,93777047+93777051-93777165,93771027	C2	66	98	39	5.88	84.57	78.69	PanAS
BANP	HsaEX0007619	chr16:88098873-88098938	66	chr16:88071617,88098873-88098938,88105675	S	66	98	40.54	0	73.84	73.84	PanAS
CENPO	HsaEX0014634	chr2:25016721-25016834	114	chr2:25016370+25016389,25016721-25016834,25022544	S	65	98	40.68	8.57	73.33	64.76	PanAS
SIPA1L2	HsaEX0058401	chr1:232669236-232669329	94	chr1:232709920,232669236-232669329,232651354	S	64	98	38.48	5.45	81.82	76.37	PanAS
RP11-69E11.4	HsaEX0055118	chr1:39989234-39989369	136	chr1:39989479,39989230+39989234-39989369,39988177	C2	64	98	56.22	16	100	84	PanAS
ZNF434	HsaEX0073678	chr16:3443649-3443814	166	chr16:3447192,3443649-3443814,3440517	C2	64	98	56.63	28.83	95.79	66.96	PanAS
PTPN18	HsaEX0050987	chr2:131117181-131117219	39	chr2:131117065,131117181-131117219,131126706	C2	63	98	59.16	12.03	90.78	78.75	PanAS
CCDC77	HsaEX0013441	chr12:518534-518587	54	chr12:514730,518534-518587,520913	C1	63	98	46.44	11.86	94.12	82.26	PanAS
SEC31B	HsaEX0056967	chr10:102258462-102258561	100	chr10:102258917,102258462-102258561,102257964	S	62	98	65.17	25	94.37	69.37	PanAS
GPR157	HsaEX0028344	chr1:9165545-9165739	195	chr1:9171335,9165545-9165739,9164693	S	62	98	56.46	6.25	84.62	78.37	PanAS
C2orf86	HsaEX0010806	chr2:63798509-63798760	252	chr2:63815331,63798509-63798760+63877972,63720074	C2	62	98	35.05	8.94	68.09	59.15	PanAS
ZNF559	HsaEX0073931	chr19:9448472-9448534	63	chr19:9435456,9448472-9448534+9448693,9449170	C1	62	98	60.27	20	90.48	70.48	PanAS
C11orf80	HsaEX0009072	chr11:66515850-66515988	139	chr11:66512170+66512390+66512491,66515850-66515988,66526514	C2	61	98	42.94	7.52	79.82	72.3	PanAS
CA5BP	HsaEX0011825	chrX:15715363-15715888	526	chrX:15711181,15715363-15715888,15720905	C2	61	98	37.25	4.76	75.26	70.5	PanAS
LRRCC1	HsaEX0036718	chr8:86021830-86021909	80	chr8:86019634+86019953,86021830-86021909+86022035,86022350	S	60	98	43.28	11.11	90.7	79.59	PanAS
TPCN1	HsaEX0066618	chr12:113663051-113663141	91	chr12:113659431,113663051-113663141,113664533	S	60	98	40.4	5.5	72.22	66.72	PanAS
PCSK6	HsaEX0046059	chr15:101871856-101871894	39	chr15:101872057,101871856-101871894,101866684	S	59	98	38.84	5.45	80.23	74.78	PanAS
FAM13A	HsaEX0024006	chr4:89912124-89912301	178	chr4:89941611,89912124-89912301,89859392	C1	59	98	66.09	36.67	93.55	56.88	PanAS
LIPT1	HsaEX0035933	chr2:99772764-99772853	90	chr2:99771514+99771831,99772764-99772853+99772889,99778420+99778622	C1	59	98	50.05	18.18	100	81.82	PanAS
AURKA	HsaEX0007339	chr20:54965612-54965721	110	chr20:54966999+54967210+54967224,54965612-54965721+54965725,54963258	S	58	98	29.69	7.8	55.88	48.08	PanAS
LRP12	HsaEX0036405	chr8:105544135-105544191	57	chr8:105601047,105544135-105544191,105521302	S	58	98	63.68	20	92.73	72.73	PanAS
RP11-69E11.4	HsaEX0055117	chr1:39989479-39989568	90	chr1:39990508,39989479-39989568,39988177	C3	58	98	37.08	9.47	68.1	58.63	PanAS
AC021755.4	HsaEX0001176	chr15:40356662-40356802	141	chr15:40338270,40356497+40356629+40356662-40356802,40357422	S	58	98	49.86	20.34	95	74.66	PanAS
ABL2	HsaEX0000712	chr1:179102447-179102509	63	chr1:179198376,179102447-179102509,179100616	C2	58	98	48.71	27.92	91.67	63.75	PanAS
POLR2J2	HsaEX0049072	chr7:102285827-102285926	100	chr7:102306524,102285827-102285926,102285009	C2	58	98	48.5	5.88	77.08	71.2	PanAS
CALCRL	HsaEX0012171	chr2:188296024-188296091	68	chr2:188312766,188296024-188296091,188252483	S	57	98	54.46	10.81	92.5	81.69	PanAS
NCRNA00265	HsaEX0042181	chr7:39803147-39803270	124	chr7:39773643,39803147-39803270,39807003	S	56	98	71.24	46.15	91.84	45.69	PanAS
CCRK	HsaEX0013709	chr9:90585483-90585545	63	chr9:90585691,90585483-90585545+90585560,90584834	C1	56	98	57.24	19.08	90.91	71.83	PanAS
GDPD5	HsaEX0027295	chr11:75190289-75190533	245	chr11:75201282,75190289-75190533,75188840	S	56	98	41.33	4.05	84.43	80.38	PanAS
ZNF107	HsaEX0073000	chr7:64139555-64139714	160	chr7:64126663,64139555-64139714,64151626	C2	56	98	47.03	2.82	86.89	84.07	PanAS
RASSF7	HsaEX0052492	chr11:563396-563478	83	chr11:563317+563347,563396-563478,563558	S	55	98	44.47	8.5	87.8	79.3	PanAS
KIAA1328	HsaEX0034037	chr18:34664088-34664195	108	chr18:34647508,34664088-34664195,34740163	S	55	98	32.44	5.88	77.89	72.01	PanAS
C4orf36	HsaEX0011046	chr4:87853374-87853471	98	chr4:87854547,87853374-87853471,87847478	C1	55	98	63.66	29.14	91.71	62.57	PanAS
PVT1	HsaEX0051352	chr8:129082406-129082518	113	chr8:129001537,129082406-129082518+129082607,129108764+129108767	C2	55	98	63.43	24.69	94.37	69.68	PanAS
PLCB1	HsaEX0048051	chr20:8782703-8782820	118	chr20:8770908,8782703-8782820,8862269	S	55	98	50.87	13.44	95.76	82.32	PanAS
S100A13	HsaEX0056082	chr1:153600597-153600713	117	chr1:153603487,153600597-153600713,153600074	C2	55	98	50.95	13.51	100	86.49	PanAS
BICC1	HsaEX0008075	chr10:60582986-60583064	79	chr10:60580228,60582986-60583064,60588521	S	54	98	29.21	2.44	52.29	49.85	PanAS
RP11-5N23.2	HsaEX0055053	chr10:6624100-6624163	64	chr10:6622889+6622903,6624100-6624163,6625638	S	54	98	43.79	7.14	87.88	80.74	PanAS
ELN	HsaEX0022193	chr7:73480274-73480327	54	chr7:73480062,73480274-73480327,73481062	S	54	98	38.85	4.11	60.73	56.62	PanAS
RALGPS1	HsaEX0052090	chr9:129961294-129961345	52	chr9:129958910,129961294-129961345,129972974+129972977	C2	54	98	40.09	7.32	83.04	75.72	PanAS
ZNF185	HsaEX0073129	chrX:152097119-152097205	87	chrX:152091353,152097119-152097205,152100216	C2	54	98	61.87	33.77	93.86	60.09	PanAS
C9orf3	HsaEX0011649	chr9:97690707-97690813	107	chr9:97686457,97690707-97690813,97717459	C2	54	98	67.76	17.09	96.46	79.37	PanAS
MS4A7	HsaEX0040264	chr11:60152561-60152695	135	chr11:60150761,60152561-60152695,60154190	S	54	98	44.91	0	81.46	81.46	PanAS
GGT1	HsaEX0027404	chr22:25006217-25006303	87	chr22:25006000,25006217-25006303,25006325+25006328+25006381+25006422	S	53	98	37	0	66.37	66.37	PanAS
ZNF532	HsaEX0073886	chr18:56598878-56598987	110	chr18:56587865,56598878-56598987,56606677	C3	53	98	39.32	6.25	80.11	73.86	PanAS
AC055839.1	HsaEX0001258	chr17:5424201-5424332	132	chr17:5424844,5424201-5424332,5421207	S	53	98	63.33	41.44	91.48	50.04	PanAS
KIAA1841	HsaEX0034303	chr2:61386453-61386574	122	chr2:61385147,61386453-61386574,61389977	C2	53	98	51.69	16.99	95.81	78.82	PanAS
ZNF182	HsaEX0073120	chrX:47847924-47848017	94	chrX:47861994,47847924-47848017+47848059,47842811	S	52	98	38.37	4.42	77.19	72.77	PanAS
ERI2	HsaEX0023066	chr16:20817037-20817267	231	chr16:20817369+20817639+20817730,20817037-20817267+20817291,20814992	S	52	98	53.1	19.23	96.92	77.69	PanAS
ZNF133	HsaEX0073026	chr20:18278629-18278706	78	chr20:18269248,18278629-18278706,18286312+18286325+18286367	C3	52	98	35.67	8.9	66.08	57.18	PanAS
WDR27	HsaEX0071038	chr6:170038635-170038756	122	chr6:170043793,170038635-170038756,170034621	C2	52	98	59.66	11.8	93.18	81.38	PanAS
ADHFE1	HsaEX0002810	chr8:67352397-67352434	38	chr8:67344810,67352397-67352434,67355033	C2	52	98	59.66	9.78	88.88	79.1	PanAS
PPP1R11	HsaEX0049547	chr6:30036056-30036130	75	chr6:30035006+30035015+30035068+30035256,30036056-30036130+30036207,30036367	S	51	98	50.81	0	88	88	PanAS
ANGPTL1	HsaEX0004102	chr1:178838249-178838358	110	chr1:178839876,178838249-178838358,178834937	S	51	98	63.64	38.24	93.3	55.06	PanAS
MELK	HsaEX0038814	chr9:36583624-36583709	86	chr9:36581736,36583624-36583709,36589533	C1	51	98	59.97	10.16	97.06	86.9	PanAS
MFSD7	HsaEX0039038	chr4:679644-679700	57	chr4:680321,679624+679644-679700,678645	C2	51	98	52.98	7.41	87.5	80.09	PanAS
ATG12	HsaEX0006547	chr5:115176194-115176309	116	chr5:115177087,115176194-115176309,115173461	C1	50	98	59.71	11.12	92.83	81.71	PanAS
CTC-205M6.2	HsaEX0017679	chr5:180258759-180258806	48	chr5:180258229,180258736+180258759-180258806+180258941,180261312	S	50	98	46.54	9.33	80.85	71.52	PanAS
RP11-453E17.1	HsaEX0054858	chr4:68586140-68586339	200	chr4:68567202,68586140-68586339+68586350+68586769,68594258	S	50	98	55.8	15.79	93.58	77.79	PanAS
PRKCD	HsaEX0050144	chr3:53199120-53199231	112	chr3:53195444,53199120-53199231,53212420	S	50	98	55.87	11.54	94.87	83.33	PanAS
ZNF678	HsaEX0074168	chr1:227770215-227770307	93	chr1:227751425,227770215-227770307,227834245	C1	50	98	57.99	1.33	85.71	84.38	PanAS
FLRT3	HsaEX0025954	chr20:14309780-14309973	194	chr20:14318050,14309780-14309973,14308204	S	49	98	36.57	0	66.67	66.67	PanAS
ZNF506	HsaEX0073807	chr19:19904769-19906469	1701	chr19:19916840,19904643+19904769-19906469,19903293+19903710	C1	49	98	48.64	6.46	76.47	70.01	PanAS
ZNF519	HsaEX0073850	chr18:14124349-14124475	127	chr18:14132274,14124349-14124475,14106408	C1	49	98	59.16	15.41	100	84.59	PanAS
ZNF786	HsaEX0074364	chr7:148777683-148777809	127	chr7:148787715,148777683-148777809,148771630	S	49	98	62.57	33.94	100	66.06	PanAS
ESRP1	HsaEX0023205	chr8:95704905-95705055	151	chr8:95690599,95704905-95705055,95718153	C3	48	98	60.47	19.18	93.4	74.22	PanAS
C14orf17	HsaEX0009454	chr14:19919138-19919273	136	chr14:19919492,19919138-19919273,19894790	C1	48	98	60.93	17.9	93.53	75.63	PanAS
NPAS2	HsaEX0043466	chr2:101611862-101611886	25	chr2:101609989,101611862-101611886,101612258	S	47	98	54.52	5.41	85.42	80.01	PanAS
NAIP	HsaEX0041617	chr5:70307102-70307201	100	chr5:70308175,70307102-70307201,70299684	C2	47	98	39.81	6.3	78.38	72.08	PanAS
PLXNB1	HsaEX0048567	chr3:48461633-48461666	34	chr3:48462074,48461307+48461633-48461666,48461083	S	46	98	72.76	46.39	91.79	45.4	PanAS
ZNF644	HsaEX0074122	chr1:91403829-91404548	720	chr1:91404651,91403829-91404548,91383711	C3	46	98	73.74	36.92	93.76	56.84	PanAS
RBMS3	HsaEX0052796	chr3:29985698-29985745	48	chr3:29977687,29985698-29985745,30029634	S	46	98	37.42	9.09	60.82	51.73	PanAS
IL15	HsaEX0031321	chr4:142609975-142610057	83	chr4:142577460,142609975-142610057+142610188,142640482+142640519+142640531	C1	46	98	62.51	31.79	100	68.21	PanAS
HSD11B1L	HsaEX0030519	chr19:5686427-5686538	112	chr19:5685130,5686427-5686538,5686911	C2	46	98	32.44	8.45	60.87	52.42	PanAS
CES8	HsaEX0014908	chr16:67040648-67040720	73	chr16:67040422+67040597,67040648-67040720,67042877	C1	46	98	53.37	20.93	90.91	69.98	PanAS
THAP6	HsaEX0064774	chr4:76465069-76465169	101	chr4:76447071,76465069-76465169,76467619	C1	46	98	66.89	20.48	99.05	78.57	PanAS
AC010203.2	HsaEX0001031	chr12:100560848-100560919	72	chr12:100561114,100560832+100560848-100560919,100560411+100560414	S	46	98	51.76	17.46	97.88	80.42	PanAS
RP11-11N9.4	HsaEX0054397	chr8:32853719-32853834	116	chr8:32785611,32853719-32853834,32899153	S	46	98	45.45	16.8	92.68	75.88	PanAS
C1orf38	HsaEX0010282	chr1:28209024-28209554	531	chr1:28208588+28208636,28209024-28209554,28211806	C2	45	98	47.76	7.66	85.91	78.25	PanAS
SP110	HsaEX0061106	chr2:231035337-231035477	141	chr2:231036782,231035337-231035477,231033953	C2	45	98	58.59	21.13	90.24	69.11	PanAS
ADPRH	HsaEX0002854	chr3:119299398-119299483	86	chr3:119298698,119299332+119299398-119299483,119300981	S	45	98	57.4	20.55	91.3	70.75	PanAS
PAMR1	HsaEX0045332	chr11:35473436-35473486	51	chr11:35489549,35473436-35473486,35463241	S	45	98	27.12	7.84	45.24	37.4	PanAS
AKR1E2	HsaEX0003475	chr10:4881921-4882018	98	chr10:4879773,4881921-4882018,4884613	C2	45	98	49.04	9.8	88.57	78.77	PanAS
FRAS1	HsaEX0026332	chr4:79387362-79387589	228	chr4:79385737,79387362-79387589,79391132	S	44	98	62.27	19.15	91.67	72.52	PanAS
ST5	HsaEX0062013	chr11:8853103-8853235	133	chr11:8860857,8853103-8853235,8832878+8832882	C2	44	98	36.29	9.6	78.78	69.18	PanAS
HYLS1	HsaEX0030775	chr11:125761318-125761367	50	chr11:125757660+125757664+125758155,125761318-125761367,125769239+125769242	S	44	98	59.03	19.52	93.28	73.76	PanAS
AC008083.1	HsaEX0000957	chr12:47603064-47603241	178	chr12:47604423,47603064-47603241+47603265,47600368+47600371	C2	44	98	66.74	13.18	90.01	76.83	PanAS
ZNF782	HsaEX0074355	chr9:99615135-99615351	217	chr9:99616370,99615135-99615351,99614287	C1	44	98	37.68	8.57	77.78	69.21	PanAS
RBMS2	HsaEX0052782	chr12:56982716-56982802	87	chr12:56982158,56982716-56982802,56982924+56983062	S	43	98	71.07	39.01	91.27	52.26	PanAS
CHD8	HsaEX0015114	chr14:21898960-21899721	762	chr14:21899970,21898960-21899721,21897494	S	43	98	72.19	25.36	92.31	66.95	PanAS
ANKRD29	HsaEX0004454	chr18:21192056-21192154	99	chr18:21197696,21192056-21192154,21181273	S	43	98	74.68	54.39	96.61	42.22	PanAS
CCDC58	HsaEX0013339	chr3:122084183-122084313	131	chr3:122084412+122084426,122084183-122084313,122081874	C2	43	98	63.21	13.54	96.47	82.93	PanAS
ZNF839	HsaEX0074439	chr14:102807660-102808054	395	chr14:102805560,102807660-102808054,102808440	S	43	98	58.44	8.57	76.75	68.18	PanAS
UBE2D3	HsaEX0068724	chr4:103746396-103746474	79	chr4:103746879,103746396-103746474,103731012	C2	43	98	45.04	8.47	80.27	71.8	PanAS
METTL8	HsaEX0038937	chr2:172271113-172271236	124	chr2:172289536,172271113-172271236,172248707	C3	43	98	45.01	0	84.51	84.51	PanAS
LPHN3	HsaEX0036250	chr4:62383033-62383236	204	chr4:62363066,62383033-62383236,62452945	S	42	98	30.73	8.37	52.56	44.19	PanAS
HMMR	HsaEX0030250	chr5:162894710-162894754	45	chr5:162891808,162894707+162894710-162894754,162896647	S	42	98	40.77	5.88	73.33	67.45	PanAS
RUNX1T1	HsaEX0055979	chr8:93088193-93088360	168	chr8:93115085,93088193-93088360+93088365,93029591+93029659	C2	42	98	49.18	1.89	87.8	85.91	PanAS
BACH2	HsaEX0007536	chr6:90981568-90981660	93	chr6:91006199,90981568-90981660,90916395+90916400	C2	42	98	35.92	7.5	84.64	77.14	PanAS
ADAMTS10	HsaEX0002407	chr19:8673016-8673130	115	chr19:8675529,8673016-8673130+8673188,8670243	C2	42	98	40.28	5.63	79.28	73.65	PanAS
LRRN3	HsaEX0036805	chr7:110739937-110740018	82	chr7:110731560,110739937-110740018,110762471	C1	42	98	58.59	20	96.08	76.08	PanAS
AC127502.1	HsaEX0001595	chr15:30772945-30773110	166	chr15:30771396,30772945-30773110,30776705	S	41	98	77.08	23.81	90.93	67.12	PanAS
DYNLL1	HsaEX0021321	chr12:120925920-120925980	61	chr12:120907907,120925920-120925980,120934205+120934219+120934224	C1	41	98	34.44	3.36	87.5	84.14	PanAS
CEP110	HsaEX0014666	chr9:123842584-123842756	173	chr9:123837345,123842584-123842756,123850574	S	41	98	60.45	23.37	100	76.63	PanAS
FAM63A	HsaEX0024549	chr1:150975060-150975182	123	chr1:150978788,150975060-150975182+150975444,150974258	C1	41	98	65.74	28.04	94.62	66.58	PanAS
C16orf93	HsaEX0009728	chr16:30770975-30771045	71	chr16:30771605,30770975-30771045,30768975	C1	41	98	35.17	7.01	86.84	79.83	PanAS
AC007405.6	HsaEX0000929	chr2:171633657-171633687	31	chr2:171627937,171633657-171633687,171633887	C1	41	98	57.26	1.93	88.92	86.99	PanAS
ZNF283	HsaEX0073351	chr19:44331928-44332092	165	chr19:44331596,44331928-44332092,44332354	S	41	98	52.47	10.77	91.75	80.98	PanAS
TMEM51	HsaEX0065866	chr1:15536986-15537058	73	chr1:15480450,15536986-15537058,15541391	C1	41	98	59.02	36.87	96.68	59.81	PanAS
ARHGAP11B	HsaEX0005401	chr15:30933725-30933820	96	chr15:30931023,30933725-30933820,30936842	S	40	98	35.21	13.51	96.83	83.32	PanAS
SYTL4	HsaEX0063331	chrX:99958089-99958181	93	chrX:99959807,99958089-99958181,99957103	C2	40	98	65.8	15.75	93.22	77.47	PanAS
SLC47A1	HsaEX0059763	chr17:19474791-19474885	95	chr17:19470541,19474791-19474885,19476093	C1	40	98	64.34	34.44	95.69	61.25	PanAS
DBF4B	HsaEX0018562	chr17:42809546-42809633	88	chr17:42808383,42809546-42809633,42811458	S	40	98	44.81	23.03	96.08	73.05	PanAS
PDCD10	HsaEX0046112	chr3:167443189-167443261	73	chr3:167452594,167443189-167443261+167452133,167438061	C1	107	97	29.98	6.67	63.88	57.21	PanAS
CALU	HsaEX0012192	chr7:128394316-128394509	194	chr7:128388858,128393872+128394316-128394509,128398925	C3	106	97	75.59	38	97.76	59.76	PanAS
CALU	HsaEX0012193	chr7:128394583-128394776	194	chr7:128388858,128394583-128394776,128398925	C3	106	97	26.33	8.77	86.75	77.98	PanAS
RPAIN	HsaEX0055409	chr17:5329556-5329619	64	chr17:5326149,5329556-5329619,5335862	C3	106	97	53.28	4.54	100	95.46	PanAS
RWDD1	HsaEX0056003	chr6:116895221-116895334	114	chr6:116892818,116895221-116895334,116901458	C1	106	97	34.35	7.36	77.78	70.42	PanAS
FAM48A	HsaEX0024467	chr13:37584689-37584792	104	chr13:37586329,37584689-37584792,37583943+37583946	S	105	97	34.69	0	80.57	80.57	PanAS
ARMC8	HsaEX0005942	chr3:137928659-137928735	77	chr3:137906441,137928659-137928735,137940768	C2	105	97	70.38	42.86	93.94	51.08	PanAS
TPD52L2	HsaEX0066664	chr20:62507169-62507228	60	chr20:62505169,62507169-62507228,62514072	S	105	97	64.83	8.6	98.04	89.44	PanAS
ANKRD17	HsaEX0004350	chr4:74005248-74006000	753	chr4:74007458,74005248-74006000,74000979+74000982	S	104	97	63.07	30.27	94.59	64.32	PanAS
PPP6R3	HsaEX0049826	chr11:68350511-68350597	87	chr11:68343502+68343511,68350511-68350597,68355266+68355395+68355413+68355446	S	104	97	74.32	39.39	91.3	51.91	PanAS
ACSL3	HsaEX0002072	chr2:223765392-223765498	107	chr2:223752606,223765392-223765498,223773451	S	104	97	43.53	7.62	91.78	84.16	PanAS
CAMLG	HsaEX0012271	chr5:134076753-134077213	461	chr5:134074482,134076753-134077213,134079677	C1	104	97	72.05	47.18	96.12	48.94	PanAS
SAPS2	HsaEX0056211	chr22:50875417-50875497	81	chr22:50874881,50875417-50875497,50875935	S	102	97	65.85	34.07	95.23	61.16	PanAS
FBXW11	HsaEX0025361	chr5:171423894-171424055	162	chr5:171433462,171423894-171424055,171337801	C2	102	97	26.99	3.09	67.45	64.36	PanAS
CTTN	HsaEX0017945	chr11:70267576-70267642	67	chr11:70266616,70267576-70267642+70267686,70268615+70269046	S	102	97	55.17	0	89.94	89.94	PanAS
GUK1	HsaEX0029094	chr1:228328825-228328989	165	chr1:228327860+228328064,228328825-228328989,228333193+228333212	S	102	97	33.43	2.27	76.62	74.35	PanAS
GS1-124K5.12	HsaEX0028791	chr7:66025566-66025662	97	chr7:66038372,66025566-66025662,66019824	S	102	97	38.91	2.75	63.54	60.79	PanAS
CELF1	HsaEX0014509	chr11:47521005-47521156	152	chr11:47522413,47521005-47521156,47510576	C2	102	97	32.87	9.52	73.51	63.99	PanAS
PLD3	HsaEX0048185	chr19:40871460-40871492	33	chr19:40854631+40854675,40871460-40871492,40872286+40872291+40872326	C3	101	97	47.22	8.12	87.6	79.48	PanAS
BRD8	HsaEX0008428	chr5:137504159-137504377	219	chr5:137504911,137504159-137504377,137503767	S	101	97	71.03	15.22	100	84.78	PanAS
HISPPD1	HsaEX0030036	chr5:102522021-102522140	120	chr5:102520441+102520445,102522021-102522140,102526543	C1	101	97	36.01	5.93	91.11	85.18	PanAS
ARHGAP12	HsaEX0005409	chr10:32142994-32143134	141	chr10:32150323,32142994-32143134,32141525	S	101	97	67.91	34.07	95.4	61.33	PanAS
PLD3	HsaEX0048186	chr19:40871764-40871837	74	chr19:40854631+40854675,40871569+40871625+40871764-40871837,40872286+40872291+40872326	C3	100	97	67	29.09	93	63.91	PanAS
MTMR14	HsaEX0040595	chr3:9731648-9731827	180	chr3:9730766,9731648-9731827,9743474	C2	100	97	72.48	30.77	96.91	66.14	PanAS
ZDHHC16	HsaEX0072469	chr10:99213556-99213603	48	chr10:99213420,99213556-99213603,99214471	C1	100	97	58.88	9.77	100	90.23	PanAS
ZNF83	HsaEX0074430	chr19:53138319-53138406	88	chr19:53141565,53138319-53138406+53138457,53122315	C2	99	97	72.03	23.13	96.37	73.24	PanAS
U2AF1	HsaEX0068560	chr21:44520563-44520629	67	chr21:44521476,44520563-44520629,44515853	S	99	97	63.4	32	95.6	63.6	PanAS
MRPL55	HsaEX0040162	chr1:228296138-228296175	38	chr1:228296656,228296138-228296175,228296022	C3	99	97	27.51	1.64	70.4	68.76	PanAS
TM2D3	HsaEX0065172	chr15:102191899-102191976	78	chr15:102192474,102191899-102191976,102190364	S	99	97	25.78	6.59	64.38	57.79	PanAS
DMWD	HsaEX0020016	chr19:46287899-46287973	75	chr19:46288852,46287899-46287973,46287548	S	99	97	53.31	4.95	100	95.05	PanAS
PLEKHM1	HsaEX0048411	chr17:43545575-43545959	385	chr17:43552466,43545575-43545959,43535805	S	98	97	55.71	6.62	100	93.38	PanAS
GUF1	HsaEX0029089	chr4:44690024-44690163	140	chr4:44688730,44690024-44690163,44691303	S	97	97	63.6	13.11	94.59	81.48	PanAS
USP8	HsaEX0070026	chr15:50724535-50724696	162	chr15:50716711,50724535-50724696,50731206	C2	97	97	25.5	2.44	65.26	62.82	PanAS
ATG9A	HsaEX0006668	chr2:220093732-220093896	165	chr2:220094257,220093732-220093896,220093207	C2	97	97	36.56	7.11	72.76	65.65	PanAS
HAGH	HsaEX0029226	chr16:1876508-1876603	96	chr16:1876713+1876942,1876508-1876603,1873038	S	96	97	30.41	6.45	74.57	68.12	PanAS
ABCD4	HsaEX0000552	chr14:74766251-74766378	128	chr14:74766853,74766251-74766378+74766738,74764772	C2	96	97	66.14	38.78	96.25	57.47	PanAS
UPP1	HsaEX0069471	chr7:48142894-48143008	115	chr7:48134424,48142894-48143008,48146470	C2	96	97	33.72	0	75.29	75.29	PanAS
PNPLA8	HsaEX0048763	chr7:108161920-108161965	46	chr7:108166473,108161920-108161965,108156018	C1	96	97	53.91	15.38	93.1	77.72	PanAS
SMURF2	HsaEX0060569	chr17:62590109-62590222	114	chr17:62594500,62590109-62590222,62589691	S	95	97	27.04	6.25	58.62	52.37	PanAS
IL17RC	HsaEX0031363	chr3:9962609-9962653	45	chr3:9962286,9962609-9962653,9965565	S	95	97	22.79	5.26	74.73	69.47	PanAS
ARID1B	HsaEX0005756	chr6:157357969-157358010	42	chr6:157256710,157357969-157358010,157405796	S	95	97	36.33	6.89	79.18	72.29	PanAS
ZNF263	HsaEX0073282	chr16:3338454-3338570	117	chr16:3336149,3338454-3338570,3339393	C2	94	97	65.32	5.9	92.12	86.22	PanAS
ATG4D	HsaEX0006640	chr19:10657515-10657758	244	chr19:10655806,10657515-10657758+10657791,10659580	C2	94	97	70.6	37.16	100	62.84	PanAS
USP8	HsaEX0070025	chr15:50716793-50716851	59	chr15:50716711,50716793-50716851,50731206	C2	94	97	24.95	7.37	50.77	43.4	PanAS
C19orf2	HsaEX0009929	chr19:30462100-30462134	35	chr19:30433571,30462100-30462134,30476130	S	94	97	68.92	27.02	92.46	65.44	PanAS
C6orf89	HsaEX0011382	chr6:36862280-36862379	100	chr6:36853804,36862280-36862379,36867202	S	94	97	31.79	1.93	96.1	94.17	PanAS
DMTF1	HsaEX0020009	chr7:86783706-86783844	139	chr7:86781871+86782260,86783706-86783844,86792811	C1	93	97	28.51	2.06	84.79	82.73	PanAS
ZNF592	HsaEX0074011	chr15:85321414-85321543	130	chr15:85308046,85321414-85321543,85325888	S	93	97	74.48	44.83	100	55.17	PanAS
ELMOD3	HsaEX0022185	chr2:85598563-85598685	123	chr2:85598332,85598563-85598685,85604467	S	92	97	74.46	45.48	100	54.52	PanAS
BANP	HsaEX0007624	chr16:88037901-88038017	117	chr16:88017865,88037417+88037901-88038017,88039696	C1	92	97	68.39	32.69	92.94	60.25	PanAS
PIKFYVE	HsaEX0047622	chr2:209169570-209169737	168	chr2:209169024+209169042,209169570-209169737,209176960	S	91	97	53.45	4.55	97.4	92.85	PanAS
C11orf30	HsaEX0008967	chr11:76170980-76171129	150	chr11:76169402,76170977+76170980-76171129,76174865	S	91	97	66.14	38.24	94.74	56.5	PanAS
HDAC7	HsaEX0029439	chr12:48189689-48189799	111	chr12:48189990,48189689-48189799,48189550	S	91	97	54.25	4.07	95.58	91.51	PanAS
TAZ	HsaEX0063725	chrX:153648044-153648085	42	chrX:153647962,153648044-153648085,153648371	S	91	97	63.87	7.93	100	92.07	PanAS
ZBTB8OS	HsaEX0072207	chr1:33100369-33100393	25	chr1:33116034,33100303+33100369-33100393,33099673	C2	91	97	75.7	46.91	96.41	49.5	PanAS
DCAF16	HsaEX0018609	chr4:17806730-17806848	119	chr4:17812070,17806730-17806848,17806379+17806394	S	90	97	62.14	31.25	94.17	62.92	PanAS
NDRG2	HsaEX0042231	chr14:21491023-21491064	42	chr14:21491400,21491023-21491064,21490656	S	90	97	46.38	10.99	97.99	87	PanAS
DEF8	HsaEX0019072	chr16:90015828-90015921	94	chr16:90015222,90015825+90015828-90015921,90020651+90020697	C1	89	97	60.18	14.34	97.56	83.22	PanAS
BCAS3	HsaEX0007843	chr17:59465979-59466069	91	chr17:59457932,59465979-59466069,59469338	C3	89	97	27	6.38	64.15	57.77	PanAS
IMMP1L	HsaEX0031576	chr11:31477807-31477933	127	chr11:31531066,31477807-31477933,31455117	C2	89	97	37.05	9.12	89.69	80.57	PanAS
MRI1	HsaEX0040082	chr19:13879173-13879261	89	chr19:13876879+13876943,13879173-13879261,13879375+13879429+13879449+13879514	C1	88	97	42.57	3.03	80.69	77.66	PanAS
ACOX3	HsaEX0001993	chr4:8375288-8375355	68	chr4:8376705,8375288-8375355,8372721	C1	88	97	67.52	27.27	100	72.73	PanAS
SENP7	HsaEX0057235	chr3:101117705-101117899	195	chr3:101136437,101117705-101117899,101090970	C1	88	97	74.53	44.97	97.01	52.04	PanAS
BMP1	HsaEX0008206	chr8:22058636-22059048	413	chr8:22054933,22058631+22058636-22059048,22059316	C1	86	97	31.65	7.26	68.3	61.04	PanAS
NAAA	HsaEX0041510	chr4:76839914-76839942	29	chr4:76841062,76839914-76839942,76836138	C2	79	97	55.97	3.56	90.85	87.29	PanAS
ZNF846	HsaEX0074459	chr19:9870536-9870618	83	chr19:9872758,9870536-9870618,9869440	S	78	97	68.33	34.43	93.39	58.96	PanAS
ZNF232	HsaEX0073214	chr17:5014371-5014514	144	chr17:5015095,5014371-5014514,5013063+5013163	S	78	97	43.96	1.41	92.86	91.45	PanAS
HEATR7A	HsaEX0029577	chr8:145215899-145215992	94	chr8:145202979,145215873+145215899-145215992,145218674	S	78	97	60.75	28.54	93.35	64.81	PanAS
POLL	HsaEX0048979	chr10:103344359-103344477	119	chr10:103344635,103344359-103344477,103343438	C2	77	97	37.57	4.61	64.75	60.14	PanAS
IFI27	HsaEX0030930	chr14:94577971-94578119	149	chr14:94577143,94577971-94578119,94581197	S	77	97	75.25	47.81	96.44	48.63	PanAS
KIAA1731	HsaEX0034261	chr11:93435942-93436085	144	chr11:93435803,93435942-93436085,93439911	S	76	97	68.8	50	100	50	PanAS
ANKS3	HsaEX0004588	chr16:4776980-4777178	199	chr16:4779981,4776980-4777178,4776777+4776781+4776855	C1	76	97	54.27	20.04	94.99	74.95	PanAS
PPIE	HsaEX0049409	chr1:40228189-40228323	135	chr1:40218724,40228189-40228323,40229361	C2	76	97	59.52	21.75	95.19	73.44	PanAS
KIAA0895L	HsaEX0033815	chr16:67215509-67215600	92	chr16:67217165,67215461+67215509-67215600,67214569	S	76	97	59.28	12.68	91.16	78.48	PanAS
C2orf84	HsaEX0010793	chr2:24360779-24360970	192	chr2:24358057,24360779-24360970,24362240	C2	76	97	38.21	7.31	79.1	71.79	PanAS
OFD1	HsaEX0044658	chrX:13769368-13769487	120	chrX:13767652,13769368-13769487,13771487	S	75	97	77.51	53.27	94.38	41.11	PanAS
DEPDC5	HsaEX0019274	chr22:32218679-32218776	98	chr22:32215211,32218679-32218776,32229901	C2	75	97	68.8	34.43	95.75	61.32	PanAS
ELMOD3	HsaEX0022178	chr2:85582678-85582721	44	chr2:85581952,85582678-85582721+85582839,85584090	C2	75	97	58.97	35.85	91.3	55.45	PanAS
EHBP1L1	HsaEX0021842	chr11:65351063-65351236	174	chr11:65349436,65351063-65351236,65351712	C1	75	97	56.1	20.95	94.69	73.74	PanAS
C10orf18	HsaEX0008812	chr10:5759622-5759713	92	chr10:5756170,5759622-5759713,5762507	C1	74	97	60.7	12.76	93.55	80.79	PanAS
THNSL2	HsaEX0064833	chr2:88484847-88484998	152	chr2:88482592,88484847-88484998,88485417+88485452+88485886	C1	74	97	36.32	6.25	70.26	64.01	PanAS
CEP164	HsaEX0014716	chr11:117253512-117253658	147	chr11:117252584,117253512-117253658,117257919	C1	73	97	40.38	4.27	86.21	81.94	PanAS
TEAD1	HsaEX0064362	chr11:12696956-12697108	153	chr11:12696381,12696956-12697108,12785726	S	72	97	59.13	6.59	93.75	87.16	PanAS
ZNF605	HsaEX0074024	chr12:133524741-133524856	116	chr12:133532829,133524734+133524741-133524856,133522383	S	72	97	29.4	6.51	72.73	66.22	PanAS
NCRNA00103	HsaEX0042148	chrX:2540731-2540775	45	chrX:2537538,2540731-2540775,2541426	S	72	97	44.24	1.96	100	98.04	PanAS
CSPP1	HsaEX0017597	chr8:68004038-68004118	81	chr8:67998345,68004038-68004118,68005778+68005783	S	72	97	36.67	6.95	81.96	75.01	PanAS
TET2	HsaEX0064525	chr4:106111517-106111662	146	chr4:106068136,106111517-106111662,106155054	S	72	97	66.34	31.51	100	68.49	PanAS
DHX32	HsaEX0019590	chr10:127573934-127574245	312	chr10:127584787,127573934-127574245,127569640	S	71	97	53.59	23.84	93.75	69.91	PanAS
CEP192	HsaEX0014753	chr18:13038514-13038578	65	chr18:13037300,13038369+13038514-13038578,13048858	C3	71	97	59.42	6.25	92.98	86.73	PanAS
ARNTL	HsaEX0006010	chr11:13347960-13348014	55	chr11:13331606,13347960-13348014,13371492	C1	71	97	32.48	0	74	74	PanAS
REPS2	HsaEX0053064	chrX:17092237-17092282	46	chrX:17088116,17092237-17092282,17121841	C2	71	97	37.12	8.99	91.6	82.61	PanAS
ZNF518B	HsaEX0073846	chr4:10456429-10456612	184	chr4:10458941,10456218+10456429-10456612,10448163	S	69	97	66.34	20.95	100	79.05	PanAS
SLC25A19	HsaEX0059019	chr17:73284583-73284672	90	chr17:73285091+73285170+73285435,73284579+73284583-73284672,73282883	C2	69	97	27.65	9.68	82.35	72.67	PanAS
ARHGAP32	HsaEX0005500	chr11:128993783-128993824	42	chr11:128994698,128993783-128993824,128993425	S	67	97	51.81	10	100	90	PanAS
DIP2C	HsaEX0019769	chr10:530721-530888	168	chr10:532399,530721-530888,518489	S	67	97	26.07	5.26	47.54	42.28	PanAS
PTER	HsaEX0050784	chr10:16479356-16479489	134	chr10:16479046,16479356-16479489,16526336	C2	67	97	52.01	18.32	100	81.68	PanAS
PTER	HsaEX0050785	chr10:16509131-16509209	79	chr10:16479046,16509131-16509209,16526336	C2	67	97	30.95	3.23	56.3	53.07	PanAS
GNB1	HsaEX0027853	chr1:1784591-1784736	146	chr1:1811226,1784591-1784736,1770677	C2	66	97	33.47	8.47	61.42	52.95	PanAS
C11orf80	HsaEX0009081	chr11:66523824-66523976	153	chr11:66512170+66512390+66512491,66523824-66523976,66526514	C2	66	97	42.78	5.25	86.77	81.52	PanAS
C7orf46	HsaEX0011460	chr7:23737811-23737918	108	chr7:23731215,23737811-23737918,23740405+23740408	S	66	97	50.88	13.57	100	86.43	PanAS
TLR4	HsaEX0065159	chr9:120470477-120470596	120	chr9:120466843,120470477-120470596,120470841	C2	66	97	29.35	2.86	61.9	59.04	PanAS
LRRC23	HsaEX0036548	chr12:7021894-7022191	298	chr12:7019190,7021894-7022191,7023055	C1	65	97	62.86	26.92	95.09	68.17	PanAS
NR4A1	HsaEX0043720	chr12:52437586-52437695	110	chr12:52435713,52437586-52437695,52448111	S	65	97	38.64	0	87.44	87.44	PanAS
SUV39H2	HsaEX0063012	chr10:14923499-14923644	146	chr10:14920918+14920959+14921126,14923499-14923644,14938845	S	65	97	30.99	2.52	79.67	77.15	PanAS
ANKMY1	HsaEX0004248	chr2:241468454-241468926	473	chr2:241492331,241468454-241468926,241465862	C3	65	97	43.82	2.22	90.34	88.12	PanAS
AMIGO2	HsaEX0003940	chr12:47472930-47473031	102	chr12:47473245,47472925+47472930-47473031,47472848	S	64	97	38.21	0	84.78	84.78	PanAS
SOBP	HsaEX0060936	chr6:107908284-107908379	96	chr6:107854814,107908284-107908379,107954718	C1	64	97	72.3	15.56	95.65	80.09	PanAS
ZNF45	HsaEX0073721	chr19:44434070-44434149	80	chr19:44435399,44434070-44434149+44434152,44429610	C2	64	97	52.09	9.52	94.39	84.87	PanAS
C21orf34	HsaEX0010546	chr21:17966660-17966774	115	chr21:17909759,17966660-17966774,17979314	C2	64	97	29.99	2.04	69.03	66.99	PanAS
C2orf84	HsaEX0010801	chr2:24390496-24390552	57	chr2:24387204,24390496-24390552,24392225	C1	64	97	48.17	3.08	83.62	80.54	PanAS
AC012621.2	HsaEX0001075	chr16:19537041-19537183	143	chr16:19535410,19537041-19537183,19539189	S	63	97	38.22	2.61	76.92	74.31	PanAS
ZNF211	HsaEX0073180	chr19:58145391-58145429	39	chr19:58144804,58145391+58145391-58145429,58145997	C2	63	97	53.01	8.73	95.52	86.79	PanAS
MBNL3	HsaEX0038124	chrX:131515387-131515460	74	chrX:131516206,131515387-131515460,131513705	S	62	97	21.58	4.25	67.52	63.27	PanAS
ZNF45	HsaEX0073720	chr19:44435399-44435517	119	chr19:44436756+44436760,44435399-44435517,44429610	C2	62	97	66.85	38.38	92.78	54.4	PanAS
ZNF518A	HsaEX0073841	chr10:97911173-97911323	151	chr10:97893405,97911173-97911323,97915083	C1	62	97	40.7	5.06	75.65	70.59	PanAS
ALS2CR8	HsaEX0003885	chr2:203777757-203777825	69	chr2:203777047,203777757-203777825+203777837,203782600	S	61	97	23.31	0	49.02	49.02	PanAS
DMKN	HsaEX0019982	chr19:36000813-36000863	51	chr19:36001086,36000813-36000863,35996888+35996951	C2	61	97	57.65	11.28	93.51	82.23	PanAS
AXIN2	HsaEX0007391	chr17:63532987-63533181	195	chr17:63533442,63532987-63533181,63532671	S	60	97	46.07	4.84	87.65	82.81	PanAS
CCDC64	HsaEX0013376	chr12:120512247-120512390	144	chr12:120510533,120512247-120512390,120518691	C1	60	97	54.32	17.12	91.84	74.72	PanAS
C6orf182	HsaEX0011316	chr6:109461628-109461878	251	chr6:109416454+109416778,109461624+109461628-109461878,109467961	C3	60	97	61.35	28.74	94.16	65.42	PanAS
RP1-180E22.3	HsaEX0054287	chr6:52443300-52443392	93	chr6:52443191,52443300-52443392,52444173	S	60	97	32.57	7.32	56.52	49.2	PanAS
ANKRD9	HsaEX0004561	chr14:102975073-102975183	111	chr14:102975866,102974978+102975073-102975183+102975189,102974886	S	59	97	63.82	27.38	94.58	67.2	PanAS
C10orf28	HsaEX0008831	chr10:99915850-99915904	55	chr10:99894463+99894781,99915850-99915904,99922640	C2	59	97	33.32	7.38	73.83	66.45	PanAS
ZNF320	HsaEX0073409	chr19:53396637-53396872	236	chr19:53397032,53396637-53396872+53396891,53394599	C1	59	97	33.93	8.68	64.52	55.84	PanAS
ABHD6	HsaEX0000634	chr3:58235605-58235669	65	chr3:58223643,58235605-58235669,58242289	S	58	97	47.39	18.42	95.24	76.82	PanAS
C19orf25	HsaEX0009939	chr19:1475137-1475238	102	chr19:1478653+1478773+1478881,1475137-1475238+1475257+1475513,1461823	S	39	97	59.54	30.61	96.28	65.67	PanAS
MIPOL1	HsaEX0039343	chr14:37688758-37688896	139	chr14:37667309,37688758-37688896+37688899,37716308	C2	39	97	38.06	0	82.14	82.14	PanAS
KIAA1958	HsaEX0034320	chr9:115380156-115380234	79	chr9:115337531,115380151+115380156-115380234,115407930	C1	39	97	25.3	2.51	51.34	48.83	PanAS
ZNF793	HsaEX0074382	chr19:38011086-38011214	129	chr19:37999305,38011086-38011214,38013434	S	39	97	59.13	33.33	95.83	62.5	PanAS
GS1-124K5.2	HsaEX0028792	chr7:65952936-65953025	90	chr7:65954925,65952936-65953025,65946586	C2	39	97	68.26	45.74	100	54.26	PanAS
RP11-383H13.1	HsaEX0054724	chr8:72877644-72877769	126	chr8:72875283,72877644-72877769,72878977	C2	39	97	73.54	54.55	91.06	36.51	PanAS
ZNF19	HsaEX0073140	chr16:71515985-71516046	62	chr16:71518492,71515985-71516046,71512905+71512908+71513003	S	38	97	67.54	49.57	92.28	42.71	PanAS
DZIP1L	HsaEX0021387	chr3:137831206-137831342	137	chr3:137834170+137834302,137831206-137831342,137822894	S	37	97	59.74	41.61	95.65	54.04	PanAS
AC005301.5	HsaEX0000865	chr22:17128553-17128675	123	chr22:17119630,17128495+17128553-17128675,17129417	C1	37	97	41.8	5.77	78.34	72.57	PanAS
GAS2L3	HsaEX0027070	chr12:100986152-100986227	76	chr12:100967563,100986152-100986227,100988653	C2	37	97	61.02	26.67	92.59	65.92	PanAS
PNPLA6	HsaEX0048735	chr19:7599265-7599332	68	chr19:7599125,7599265-7599332,7599636	S	37	97	58.66	30.7	93.92	63.22	PanAS
ZNF320	HsaEX0073408	chr19:53397032-53397109	78	chr19:53465980,53397032-53397109,53396872	C3	37	97	69.31	31.41	91.69	60.28	PanAS
SLC2A11	HsaEX0059276	chr22:24199608-24199718	111	chr22:24199178,24199608-24199718,24204291	S	36	97	26.21	9.23	54.05	44.82	PanAS
INTS12	HsaEX0031865	chr4:106624805-106624966	162	chr4:106629076,106624805-106624966+106624969,106621171	S	36	97	51.03	9.09	80	70.91	PanAS
GABARAPL1	HsaEX0026745	chr12:10366673-10366786	114	chr12:10365818+10366216+10366313,10366673-10366786,10370662	C2	36	97	54.77	8.61	87.15	78.54	PanAS
C12orf48	HsaEX0009197	chr12:102589090-102589225	136	chr12:102576405,102589090-102589225,102589729	C1	36	97	55.83	22.62	100	77.38	PanAS
ZNF239	HsaEX0073238	chr10:44063347-44063469	123	chr10:44069919+44069988,44063343+44063347-44063469,44053619	C1	36	97	40.72	0	88.39	88.39	PanAS
RP11-500G10.1	HsaEX0054943	chr10:131902347-131902494	148	chr10:131908968,131902347-131902494,131878165	C2	36	97	28.31	9.09	54.95	45.86	PanAS
SAMD10	HsaEX0056128	chr20:62609598-62609686	89	chr20:62610730+62611207,62609598-62609686+62609697+62609714,62608759	S	35	97	42.04	7.14	67.01	59.87	PanAS
ZNF749	HsaEX0074295	chr19:57953253-57953379	127	chr19:57946891+57946961+57947035,57953253-57953379,57954659	S	35	97	59.07	24.18	100	75.82	PanAS
MRVI1	HsaEX0040237	chr11:10711812-10711912	101	chr11:10715009+10715083+10715367,10711812-10711912+10711916,10655618	C2	35	97	65.17	16.72	90.93	74.21	PanAS
CTNND2	HsaEX0017880	chr5:11083993-11084067	75	chr5:11098687,11083993-11084067,11082958	S	35	97	29.9	5.8	59.62	53.82	PanAS
SCUBE2	HsaEX0056672	chr11:9074293-9074379	87	chr11:9074646,9074293-9074379,9072257	C2	35	97	34.35	6.96	69.94	62.98	PanAS
ALG1L	HsaEX0003699	chr3:125652177-125652232	56	chr3:125652418,125652177-125652232,125651552	S	35	97	62.54	14.72	95.2	80.48	PanAS
ATP6AP1L	HsaEX0006952	chr5:81601075-81601300	226	chr5:81600669,81600753+81601075-81601300,81605976	S	35	97	60.34	5.12	83.27	78.15	PanAS
LPHN3	HsaEX0036243	chr4:62248842-62248907	66	chr4:62067483,62248842-62248907,62362839	S	35	97	55.49	26.36	94.21	67.85	PanAS
TLR1	HsaEX0065154	chr4:38802478-38802569	92	chr4:38805927,38802478-38802569,38800519	C2	35	97	70.86	22.73	100	77.27	PanAS
KCNC4	HsaEX0032957	chr1:110774843-110775219	377	chr1:110768800,110774843-110775219,110775533	S	34	97	41.88	9.09	88.24	79.15	PanAS
SLC11A1	HsaEX0058562	chr2:219250135-219250208	74	chr2:219249989,219250135-219250208,219251358	S	34	97	25.81	6.33	46.04	39.71	PanAS
CENPI	HsaEX0014598	chrX:100354798-100354919	122	chrX:100353528,100354798-100354919+100355054,100356047	S	34	97	33.74	8.77	82.94	74.17	PanAS
WDR86	HsaEX0071405	chr7:151105978-151106139	162	chr7:151106331+151106513,151105978-151106139,151097327	S	34	97	40.65	0	63.84	63.84	PanAS
CTC-454M9.1	HsaEX0017708	chr5:88238833-88238939	107	chr5:88201087,88238833-88238939,88261658	C2	34	97	41.34	7.32	75.97	68.65	PanAS
FKBP5	HsaEX0025851	chr6:35640369-35640536	168	chr6:35646735,35640369-35640536,35614627	C3	34	97	55.75	17.52	91.01	73.49	PanAS
LST1	HsaEX0036876	chr6:31555721-31555743	23	chr6:31555510,31555721-31555743,31556295	C1	34	97	79.39	33.2	94.68	61.48	PanAS
RRN3P3	HsaEX0055750	chr16:22437534-22437687	154	chr16:22441117,22437534-22437687,22433535	C2	34	97	45.12	13.21	100	86.79	PanAS
ATF7IP2	HsaEX0006533	chr16:10513438-10513480	43	chr16:10479979+10480308,10513438-10513480,10522725	C2	33	97	49.7	16.67	90.95	74.28	PanAS
ZNF433	HsaEX0073671	chr19:12145643-12145689	47	chr19:12146352+12146362,12145643-12145689,12129107+12129116+12129195	S	33	97	28.12	5.88	72.29	66.41	PanAS
TRIM46	HsaEX0067145	chr1:155151285-155151322	38	chr1:155151089,155151285-155151322,155152108	S	32	97	58.9	21.44	100	78.56	PanAS
NAALAD2	HsaEX0041522	chr11:89903237-89903304	68	chr11:89902160,89903237-89903304,89906992	S	32	97	59.98	32.2	96.36	64.16	PanAS
SGIP1	HsaEX0057796	chr1:67101630-67101698	69	chr1:67098777,67101627+67101630-67101698,67105460+67105463	C1	32	97	46.46	9.28	83.07	73.79	PanAS
PAQR5	HsaEX0045486	chr15:69652305-69652470	166	chr15:69629840,69652305-69652470,69672222	S	32	97	65.11	40.24	91.19	50.95	PanAS
TATDN1	HsaEX0063703	chr8:125516081-125516192	112	chr8:125516516,125516081-125516192,125507783	C1	32	97	53.21	6.32	90	83.68	PanAS
ZNF620	HsaEX0074071	chr3:40552961-40553087	127	chr3:40547867,40552961-40553087,40553893	C3	32	97	40.13	8.57	89.19	80.62	PanAS
ZNF319	HsaEX0073404	chr16:58033397-58033569	173	chr16:58034305,58033397-58033569+58033574,58032426	S	31	97	51.99	17.51	93.36	75.85	PanAS
RBMS2	HsaEX0052784	chr12:56961850-56961970	121	chr12:56956367,56961850-56961970,56963683	C2	31	97	29.27	3.01	67.58	64.57	PanAS
STON2	HsaEX0062589	chr14:81790361-81790531	171	chr14:81837332,81790361-81790531,81745083	S	31	97	47.35	6.78	84.62	77.84	PanAS
RNF212	HsaEX0054037	chr4:1102131-1102192	62	chr4:1107144,1102131-1102192,1090627	C1	31	97	62.84	32.09	94.87	62.78	PanAS
ZNF75D	HsaEX0074302	chrX:134475693-134475879	187	chrX:134477186,134475693-134475879,134429848+134429965	C2	31	97	68.52	33.33	93.07	59.74	PanAS
ZNF43	HsaEX0073649	chr19:22025947-22026128	182	chr19:22034707,22025947-22026128,22002023	C3	31	97	55.42	10.02	100	89.98	PanAS
FANK1	HsaEX0024861	chr10:127668730-127668894	165	chr10:127585224,127668730-127668894+127668907,127677120	C1	31	97	52.49	7.14	85.56	78.42	PanAS
C14orf17	HsaEX0009453	chr14:19919492-19919605	114	chr14:19921359,19919492-19919605,19919273	C2	31	97	64.36	28.81	91.46	62.65	PanAS
RP11-63E5.6	HsaEX0055076	chr8:259335-259453	119	chr8:261133,259335-259453,257008	C1	31	97	35.5	0	56.65	56.65	PanAS
CDKL3	HsaEX0014392	chr5:133647983-133648071	89	chr5:133655049,133647983-133648071,133644418	C2	30	97	43.22	18.01	94.65	76.64	PanAS
FAM122C	HsaEX0023893	chrX:133986830-133986926	97	chrX:133983258,133986830-133986926,133988121	C2	30	97	76.18	50.77	100	49.23	PanAS
C1orf116	HsaEX0010125	chr1:207198232-207198409	178	chr1:207205924+207206052,207198227+207198232-207198409,207196822+207196825	C2	30	97	75.13	47.43	100	52.57	PanAS
AC025260.4	HsaEX0001196	chr12:93959389-93959520	132	chr12:93960520,93959389-93959520,93939134+93939174	S	30	97	28.17	0	61.81	61.81	PanAS
IKZF2	HsaEX0031267	chr2:214014868-214014971	104	chr2:214016137,214014868-214014971,214013368	C1	30	97	37.83	6.59	66.06	59.47	PanAS
C3orf18	HsaEX0010853	chr3:50602957-50603292	336	chr3:50604894,50602897+50602957-50603292,50599178	C2	30	97	33.53	5.69	68.59	62.9	PanAS
SGCA	HsaEX0057760	chr17:48246453-48246615	163	chr17:48245933,48246453-48246615,48247504	C2	30	97	67.26	30.26	94.73	64.47	PanAS
HEXIM2	HsaEX0029851	chr17:43239855-43240002	148	chr17:43238310,43239855-43240002,43240117	C1	30	97	53.01	20.79	93.22	72.43	PanAS
ZNF323	HsaEX0073413	chr6:28297080-28297491	412	chr6:28304567,28297080-28297491+28297555,28295310	C2	30	97	62.96	27.39	91.01	63.62	PanAS
RP11-392O18.1	HsaEX0054744	chr3:150336496-150336715	220	chr3:150321286+150321473,150336496-150336715,150340172	S	29	97	67.82	27.99	90.87	62.88	PanAS
TNK2	HsaEX0066268	chr3:195619282-195621234	1953	chr3:195622766+195622924,195619282-195621234,195615477	C1	29	97	41.2	6.02	76.98	70.96	PanAS
AC005301.5	HsaEX0000862	chr22:17094967-17095068	102	chr22:17083105,17094875+17094967-17095068,17117930+17117933	C3	29	97	55.79	17.91	91.72	73.81	PanAS
C11orf73	HsaEX0009059	chr11:86030004-86030101	98	chr11:86017524,86029978+86030004-86030101,86048421	C1	29	97	42.36	2.63	85.85	83.22	PanAS
AC073995.2	HsaEX0001323	chr2:96480419-96480539	121	chr2:96502685,96480419-96480539,96479882+96479893	C2	29	97	56.09	10.71	100	89.29	PanAS
RP11-53O19.1	HsaEX0054993	chr5:44777139-44777203	65	chr5:44808744,44777139-44777203+44777430,44746140	C2	29	97	45.88	16.94	92.86	75.92	PanAS
PTPN2	HsaEX0050993	chr18:12821335-12821424	90	chr18:12825809,12821335-12821424,12819281	C3	29	97	36.03	5.98	76.93	70.95	PanAS
ZFP161	HsaEX0072652	chr18:5293971-5294000	30	chr18:5295812,5293971-5294000,5293326	S	29	97	39.5	8.57	73.38	64.81	PanAS
C1orf85	HsaEX0010334	chr1:156260768-156260897	130	chr1:156261194,156260768-156260897,156260151	C2	29	97	35.77	3.89	78.5	74.61	PanAS
HNRNPA2B1	HsaEX0030279	chr7:26237451-26237486	36	chr7:26240192,26237451-26237486,26237352	S	108	96	17.93	6.05	47.71	41.66	PanAS
CASC4	HsaEX0012510	chr15:44695085-44695252	168	chr15:44673174,44695085-44695252,44705534	S	107	96	69.91	38.26	94.4	56.14	PanAS
NUMB	HsaEX0044217	chr14:73833605-73833689	85	chr14:73876645,73833605-73833689,73822474	S	107	96	75.21	23.53	96.49	72.96	PanAS
SEC31A	HsaEX0056948	chr4:83783687-83783725	39	chr4:83784471,83783687-83783725,83778917	C2	107	96	55.55	13.36	96.23	82.87	PanAS
C1orf43	HsaEX0010283	chr1:154192312-154192413	102	chr1:154192818+154192895,154192312-154192413,154187050	S	107	96	66.45	13.17	94.47	81.3	PanAS
CD46	HsaEX0013870	chr1:207963598-207963690	93	chr1:207959027,207963598-207963690,207966864	S	107	96	29.39	4.49	56.9	52.41	PanAS
SMARCC2	HsaEX0060329	chr12:56566721-56566813	93	chr12:56567480,56566721-56566813,56566485+56566488	S	106	96	29.21	7.14	94.18	87.04	PanAS
RBM6	HsaEX0052755	chr3:50004903-50006181	1279	chr3:50000118,50004631+50004766+50004903-50006181,50085678	C2	106	96	73.84	26.42	98.43	72.01	PanAS
ANAPC16	HsaEX0004048	chr10:73983651-73983814	164	chr10:73975830+73975896+73975990,73983646+73983651-73983814,73990124	C1	106	96	76.22	58.04	94.01	35.97	PanAS
ZMYND11	HsaEX0072943	chr10:267135-267296	162	chr10:255988,267135-267296,282778	S	106	96	73.25	34.13	94.43	60.3	PanAS
OPA1	HsaEX0044739	chr3:193343881-193343991	111	chr3:193336725,193343881-193343991,193349401	S	105	96	43.12	5.5	90.91	85.41	PanAS
HP1BP3	HsaEX0030383	chr1:21106838-21107033	196	chr1:21113688,21106838-21107033,21106404	C1	105	96	64.33	25.7	94.1	68.4	PanAS
STX16	HsaEX0062679	chr20:57244358-57244509	152	chr20:57243183,57244347+57244358-57244509,57245568	S	104	96	68.14	20.8	98.74	77.94	PanAS
ARHGEF12	HsaEX0005617	chr11:120280103-120280159	57	chr11:120278532,120280103-120280159,120291462	S	103	96	40.67	3.85	100	96.15	PanAS
BCL2L13	HsaEX0007900	chr22:18178907-18178976	70	chr22:18171908,18178907-18178976,18185009	C1	103	96	74.08	39.86	100	60.14	PanAS
ATF2	HsaEX0006495	chr2:175986172-175986268	97	chr2:175994866,175986172-175986268,175983092+175983097	S	103	96	67	11.94	94.69	82.75	PanAS
PSPC1	HsaEX0050671	chr13:20283682-20283739	58	chr13:20304379,20283682-20283739,20251963	C2	103	96	66.55	24.8	96.24	71.44	PanAS
SEC24B	HsaEX0056909	chr4:110402833-110402937	105	chr4:110394342,110402833-110402937,110412483	S	103	96	30.47	4.5	65.61	61.11	PanAS
FUBP3	HsaEX0026573	chr9:133510054-133510125	72	chr9:133507665,133510054-133510125,133511386	S	102	96	76.5	30.77	97.73	66.96	PanAS
CAPN7	HsaEX0012383	chr3:15282960-15283095	136	chr3:15282360,15282960-15283095,15283685	S	102	96	67.87	10.82	100	89.18	PanAS
PEX5	HsaEX0046666	chr12:7354858-7354947	90	chr12:7354437,7354837+7354858-7354947,7355208	S	102	96	38.52	4.67	86.67	82	PanAS
MRRF	HsaEX0040218	chr9:125048318-125048445	128	chr9:125048225,125048318-125048445,125054028	C3	102	96	38.59	2.65	85.71	83.06	PanAS
STAU2	HsaEX0062380	chr8:74621267-74621397	131	chr8:74650519,74621267-74621397+74621412,74601048	S	101	96	30.52	6.66	76.76	70.1	PanAS
OPTN	HsaEX0044791	chr10:13150138-13150289	152	chr10:13142302,13150138-13150289,13151097+13151112	C1	101	96	24.02	5.62	62.54	56.92	PanAS
MGRN1	HsaEX0039140	chr16:4730033-4730098	66	chr16:4727573,4730033-4730098,4731551	S	100	96	65.97	25	95.65	70.65	PanAS
CLK4	HsaEX0015709	chr5:178046839-178046897	59	chr5:178050257,178046839-178046897,178045779	S	100	96	29.75	4.17	100	95.83	PanAS
ANKHD1	HsaEX0004219	chr5:139851824-139851880	57	chr5:139844361,139851824-139851880,139862165	S	100	96	57.1	2.04	96.08	94.04	PanAS
NCOR2	HsaEX0042129	chr12:124858959-124859009	51	chr12:124862783,124858959-124859009,124857156	S	99	96	40.21	6.19	95.74	89.55	PanAS
MAP3K3	HsaEX0037558	chr17:61712069-61712161	93	chr17:61710162,61712069-61712161,61723394	S	99	96	27.76	2.53	61.51	58.98	PanAS
ST7	HsaEX0062057	chr7:116774178-116774246	69	chr7:116772014,116774178-116774246,116776135	S	99	96	51.63	3.35	93.04	89.69	PanAS
MARK2	HsaEX0037915	chr11:63671458-63671619	162	chr11:63670630,63671458-63671619,63672258	S	99	96	54.54	10.1	93.64	83.54	PanAS
NCOA2	HsaEX0042057	chr8:71056877-71057083	207	chr8:71060508,71056877-71057083,71053634	S	99	96	72.36	31.82	98.56	66.74	PanAS
MPPE1	HsaEX0040009	chr18:11884878-11885042	165	chr18:11885675,11884878-11885042,11884621+11884626	S	99	96	24.13	4.33	69.64	65.31	PanAS
SIK3	HsaEX0058317	chr11:116746582-116746725	144	chr11:116746969,116746582-116746725,116746167	S	98	96	68.8	19.16	92.74	73.58	PanAS
ARMC6	HsaEX0005924	chr19:19144940-19145047	108	chr19:19144739+19144817+19144822,19144940-19145047,19153513+19153520+19153525	S	98	96	22.78	2.54	62.75	60.21	PanAS
AGAP3	HsaEX0003040	chr7:150837070-150837203	134	chr7:150831655,150837066+150837070-150837203,150838985	C2	98	96	71.12	30.67	93.29	62.62	PanAS
ASAP1	HsaEX0006164	chr8:131104219-131104389	171	chr8:131124340,131104219-131104389,131092217	S	98	96	73.43	24.32	96.77	72.45	PanAS
C17orf101	HsaEX0009733	chr17:80352207-80352419	213	chr17:80356072,80352207-80352419,80350410	S	98	96	37.56	6.28	91.84	85.56	PanAS
MKNK2	HsaEX0039398	chr19:2039630-2039855	226	chr19:2040133,2039630-2039855,2037828	S	98	96	51.93	7.42	96.23	88.81	PanAS
UBAP2L	HsaEX0068685	chr1:154241838-154241888	51	chr1:154241430,154241838-154241888,154242676	C1	98	96	25.43	6.87	56.33	49.46	PanAS
OXR1	HsaEX0045052	chr8:107749748-107749828	81	chr8:107726213,107749748-107749828,107751686	C1	98	96	45.85	15.85	97.14	81.29	PanAS
THOC5	HsaEX0064870	chr22:29946717-29946824	108	chr22:29949437+29949660,29946717-29946824+29946832,29945147	S	97	96	34.32	3.53	74.71	71.18	PanAS
EIF4E2	HsaEX0022024	chr2:233438973-233439051	79	chr2:233431924,233438973-233439051,233445614	S	97	96	43.87	4.92	85.16	80.24	PanAS
ZCCHC10	HsaEX0072305	chr5:132358533-132358598	66	chr5:132362189,132358533-132358598,132342612	C1	97	96	38.7	7.77	91.27	83.5	PanAS
SYNRG	HsaEX0063233	chr17:35880282-35880317	36	chr17:35880641,35880282-35880317,35879174	S	96	96	59.01	8.28	100	91.72	PanAS
MAPK8	HsaEX0037780	chr10:49533940-49534008	69	chr10:49516331,49533940-49534008,49609655	C2	96	96	28.98	3.92	77.87	73.95	PanAS
UNK	HsaEX0069419	chr17:73787841-73788100	260	chr17:73781065,73787841-73788100,73805841	C2	96	96	49.84	0	94.61	94.61	PanAS
RABL2B	HsaEX0051832	chr22:51221467-51221714	248	chr22:51221819+51221929,51221197+51221319+51221467-51221714,51220732+51220775+51220779	S	95	96	26.88	3.09	95.45	92.36	PanAS
KIAA0528	HsaEX0033678	chr12:22612426-22612476	51	chr12:22622643,22612426-22612476,22610095	C2	95	96	33.88	0.93	89.83	88.9	PanAS
SGSM2	HsaEX0057884	chr17:2270565-2270699	135	chr17:2268635,2270459+2270565-2270699,2274556	S	95	96	34.2	9.21	69.23	60.02	PanAS
LTBP3	HsaEX0036935	chr11:65307484-65307624	141	chr11:65307716,65307484-65307624,65307352	S	95	96	40.85	2.66	82.81	80.15	PanAS
NHLRC3	HsaEX0042877	chr13:39616343-39616442	100	chr13:39613848,39616242+39616343-39616442,39618227	S	95	96	66.55	25.19	96.32	71.13	PanAS
EHMT2	HsaEX0021884	chr6:31856746-31856847	102	chr6:31857005,31856746-31856847,31856524	S	95	96	72.72	26.32	94.12	67.8	PanAS
ZBTB38	HsaEX0072142	chr3:141157110-141157207	98	chr3:141122873,141157085+141157110-141157207,141161231	C1	95	96	22.19	1.7	43	41.3	PanAS
WIZ	HsaEX0071548	chr19:15538921-15539319	399	chr19:15540397,15538921-15539319,15538344	S	94	96	67.28	29.19	96	66.81	PanAS
BIN1	HsaEX0008093	chr2:127815049-127815177	129	chr2:127816587,127815049-127815177,127808819	C2	94	96	42.26	4.13	89.46	85.33	PanAS
PRMT7	HsaEX0050291	chr16:68345945-68346079	135	chr16:68345002,68345945-68346079,68349800	C1	94	96	56.95	0.42	93.69	93.27	PanAS
HIRIP3	HsaEX0030026	chr16:30005227-30006164	938	chr16:30006424,30005227-30006164,30005129	S	94	96	64.88	8.33	100	91.67	PanAS
ZMIZ1	HsaEX0072856	chr10:81070681-81070941	261	chr10:81067328,81070681-81070941,81072399	S	93	96	62.41	33.33	100	66.67	PanAS
GRB10	HsaEX0028556	chr7:50778572-50778687	116	chr7:50799969,50778572-50778687,50771605	C3	93	96	21.05	6	37.73	31.73	PanAS
TOP3B	HsaEX0066517	chr22:22325352-22325433	82	chr22:22326249,22325352-22325433,22324778	C1	92	96	27.51	1.59	56.52	54.93	PanAS
PACRGL	HsaEX0045171	chr4:20709426-20709493	68	chr4:20706437,20709426-20709493,20715055	C2	92	96	68.91	3.87	100	96.13	PanAS
AL592284.1	HsaEX0003553	chr1:144519813-144519867	55	chr1:144520774,144519813-144519867,144481765	C1	92	96	29.73	3.28	72.7	69.42	PanAS
ZNF189	HsaEX0073137	chr9:104161677-104161735	59	chr9:104161471,104161677-104161735+104161748+104161812,104162166+104162208+104162211	S	91	96	25.08	0	62.44	62.44	PanAS
CCDC88A	HsaEX0013496	chr2:55530205-55530288	84	chr2:55535945,55530205-55530288,55529208	S	91	96	63.38	33.71	97.37	63.66	PanAS
IL6ST	HsaEX0031522	chr5:55272043-55272121	79	chr5:55447758,55272043-55272121,55235958	C3	91	96	51.9	11.23	94.47	83.24	PanAS
PARD3	HsaEX0045508	chr10:34661426-34661464	39	chr10:34663802,34661426-34661464,34649187	S	90	96	55.34	20.84	98.44	77.6	PanAS
FHL2	HsaEX0025753	chr2:106013104-106013154	51	chr2:106015299,106013104-106013154,106002997	C2	90	96	37.48	5.33	77.1	71.77	PanAS
RBBP6	HsaEX0052533	chr16:24579113-24579214	102	chr16:24578826,24579113-24579214,24580066	S	89	96	64.73	31.41	99.53	68.12	PanAS
CREM	HsaEX0017227	chr10:35477128-35477316	189	chr10:35468204,35477128-35477316,35495823	C2	89	96	25.04	6.95	87.7	80.75	PanAS
MLL5	HsaEX0039508	chr7:104678573-104678646	74	chr7:104654982,104678573-104678646,104681286	S	89	96	26.41	3.05	72.36	69.31	PanAS
CEP78	HsaEX0014863	chr9:80880775-80880822	48	chr9:80880459,80880775-80880822,80881358+80881533	S	85	96	41.7	11.7	92.26	80.56	PanAS
ZNF75A	HsaEX0074299	chr16:3363049-3363175	127	chr16:3362768,3363049-3363175,3366634+3366912+3366939	C1	85	96	68.65	33.33	100	66.67	PanAS
MEGF8	HsaEX0038767	chr19:42875502-42875634	133	chr19:42874983,42875502-42875634,42879659	S	85	96	69.23	41.93	100	58.07	PanAS
USP54	HsaEX0069997	chr10:75264608-75264748	141	chr10:75265066+75265081,75264608-75264748,75260596	S	84	96	53.22	25.79	94.97	69.18	PanAS
FBXW7	HsaEX0025372	chr4:153333632-153333681	50	chr4:153456093,153333632-153333681,153333024	S	84	96	53.92	15.79	91.9	76.11	PanAS
ECHDC2	HsaEX0021500	chr1:53372191-53372280	90	chr1:53373540,53371845+53372191-53372280+53372283,53370750+53370762	C1	83	96	42.41	2.22	88.08	85.86	PanAS
AHI1	HsaEX0003246	chr6:135816952-135817036	85	chr6:135818721,135816952-135817036,135813429	C2	83	96	28.56	7.14	78.9	71.76	PanAS
ABHD12	HsaEX0000601	chr20:25281335-25281520	186	chr20:25282855,25281335-25281520+25282014,25275666	S	82	96	73.96	22.64	97.44	74.8	PanAS
NEDD1	HsaEX0042402	chr12:97303530-97303673	144	chr12:97301634,97303530-97303673,97311399	C3	82	96	72.87	42.97	100	57.03	PanAS
ZMYM4	HsaEX0072910	chr1:35761528-35761589	62	chr1:35734686+35734695,35761528-35761589,35790961	S	82	96	41.49	6.9	77.08	70.18	PanAS
SLC25A40	HsaEX0059122	chr7:87489387-87489484	98	chr7:87489887,87489387-87489484,87488066	S	81	96	22.74	0	68.18	68.18	PanAS
KLHL5	HsaEX0034863	chr4:39064179-39064655	477	chr4:39046716,39064179-39064655,39077585	S	81	96	31.98	2.64	72.94	70.3	PanAS
RP5-995J12.2	HsaEX0055387	chr20:42843596-42843643	48	chr20:42839717+42839996+42840014+42840131,42843528+42843547+42843596-42843643,42853461	C1	81	96	56.16	16.59	100	83.41	PanAS
ZKSCAN5	HsaEX0072837	chr7:99117795-99117927	133	chr7:99110214,99117792+99117795-99117927,99123436	C2	80	96	51.28	11.29	100	88.71	PanAS
ARHGEF10	HsaEX0005579	chr8:1828214-1828330	117	chr8:1824900,1828214-1828330,1830801	S	79	96	52.06	9.68	100	90.32	PanAS
FAM107B	HsaEX0023746	chr10:14595321-14595386	66	chr10:14646239,14595321-14595386,14572514	C1	79	96	34.71	2.56	88.37	85.81	PanAS
C5orf42	HsaEX0011155	chr5:37157415-37157522	108	chr5:37157772,37157415-37157522,37154095	S	78	96	38.61	7.28	95.35	88.07	PanAS
DEPDC5	HsaEX0019268	chr22:32217488-32217623	136	chr22:32215211,32217488-32217623,32229901	C2	78	96	71.56	42.03	100	57.97	PanAS
MLH3	HsaEX0039449	chr14:75500122-75500193	72	chr14:75505043,75500122-75500193,75498882	C1	78	96	59.64	18	100	82	PanAS
G3BP2	HsaEX0026717	chr4:76649240-76649360	121	chr4:76649460,76649240-76649360,76587233	C1	78	96	31.03	2.02	68.37	66.35	PanAS
RP11-33B1.1	HsaEX0054666	chr4:120420716-120421026	311	chr4:120419058,120420716-120421026,120433506	C1	78	96	35.68	0	65.82	65.82	PanAS
PPIL5	HsaEX0049450	chr14:50074118-50074839	722	chr14:50069181+50069186,50074118-50074839,50080974	C1	77	96	64.47	24.21	94.67	70.46	PanAS
TMEM116	HsaEX0065402	chr12:112403399-112403563	165	chr12:112429562,112403399-112403563,112381115+112381173	C2	77	96	23.25	6.01	50.85	44.84	PanAS
N4BP2L1	HsaEX0041432	chr13:32978340-32978408	69	chr13:32980901+32981387,32978340-32978408,32977337	C3	76	96	32.41	0	88.82	88.82	PanAS
WHAMML1	HsaEX0071477	chr15:23194132-23194251	120	chr15:23194713,23194132-23194251,23191920	S	76	96	41.26	0.42	84.33	83.91	PanAS
RP11-421L21.3	HsaEX0054787	chr1:101549017-101549130	114	chr1:101491617,101549017-101549130,101552408	C2	76	96	62.21	9.37	100	90.63	PanAS
ZNF207	HsaEX0073176	chr17:30697019-30697101	83	chr17:30696801,30697019-30697101,30700418	S	76	96	36.21	8.66	95.99	87.33	PanAS
C5orf35	HsaEX0011121	chr5:56206996-56207363	368	chr5:56205570,56206996-56207363,56208838	C1	76	96	59.98	23.6	96.92	73.32	PanAS
NKTR	HsaEX0043064	chr3:42661508-42661535	28	chr3:42661200,42661508-42661535,42662921	S	75	96	52.93	8.94	93.51	84.57	PanAS
NUDT7	HsaEX0044189	chr16:77770547-77770640	94	chr16:77769883,77770547-77770640,77775479	C2	75	96	28.85	2.7	82.5	79.8	PanAS
EPB41L1	HsaEX0022627	chr20:34761686-34761876	191	chr20:34742818,34761686-34761876,34763473	C2	75	96	62.26	15.15	94.81	79.66	PanAS
POC1B	HsaEX0048787	chr12:89890948-89891119	172	chr12:89918897,89890948-89891119,89885892	S	75	96	56.4	32.69	93.96	61.27	PanAS
ROBO1	HsaEX0054205	chr3:78696779-78696805	27	chr3:78700882,78696779-78696805,78695340	S	73	96	58.88	12.03	93.62	81.59	PanAS
CARD8	HsaEX0012444	chr19:48752780-48752890	111	chr19:48753008,48752780-48752890,48744320	C1	73	96	60.49	35.92	100	64.08	PanAS
RAPH1	HsaEX0052307	chr2:204334962-204335036	75	chr2:204354307,204334962-204335036,204326648	C1	72	96	28.38	7.96	83.74	75.78	PanAS
SMG6	HsaEX0060452	chr17:2206308-2206446	139	chr17:2206927,2206308-2206446+2206450,2203958	S	72	96	30.67	7.69	78.23	70.54	PanAS
LRP8	HsaEX0036473	chr1:53715052-53715112	61	chr1:53716362,53715052-53715112+53715228,53712728	S	71	96	40.77	0	83.05	83.05	PanAS
CASP8	HsaEX0012592	chr2:202137621-202137665	45	chr2:202137499,202137621-202137665,202139612	C1	71	96	60.73	13.51	91.91	78.4	PanAS
MTUS1	HsaEX0040749	chr8:17581181-17581342	162	chr8:17601113,17581181-17581342,17573410	S	71	96	63.92	0	100	100	PanAS
C7orf46	HsaEX0011461	chr7:23724118-23724291	174	chr7:23719902,23724118-23724291,23728888	S	71	96	66.61	21.88	100	78.12	PanAS
TOR2A	HsaEX0066555	chr9:130496578-130496843	266	chr9:130497399,130496578-130496843,130495839	S	71	96	65.12	30.26	100	69.74	PanAS
C2orf84	HsaEX0010798	chr2:24384376-24384483	108	chr2:24369956,24384376-24384483,24387068	C2	71	96	42.15	9.16	100	90.84	PanAS
ZNF226	HsaEX0073206	chr19:44679137-44679324	188	chr19:44677105,44679137-44679324,44679651	S	70	96	44.23	3.96	81.16	77.2	PanAS
L3MBTL3	HsaEX0035149	chr6:130370901-130370975	75	chr6:130370538,130370796+130370901-130370975,130372394	S	70	96	42.6	3.8	92.24	88.44	PanAS
FGFR2	HsaEX0025680	chr10:123324952-123325218	267	chr10:123353223,123324952-123325218,123324093	C1	70	96	72.1	45.95	96	50.05	PanAS
DTNB	HsaEX0021094	chr2:25606705-25606758	54	chr2:25610158,25606705-25606758,25602192	C1	70	96	39.44	5.47	80.64	75.17	PanAS
MR1	HsaEX0040046	chr1:181021371-181021646	276	chr1:181019422,181021371-181021646,181022709	S	70	96	31.41	6.43	57.26	50.83	PanAS
C22orf36	HsaEX0010618	chr22:24985124-24985209	86	chr22:24985789,24984647+24985124-24985209+24985233+24985302+24985361+24985581,24984297	S	69	96	63.93	18.99	93.68	74.69	PanAS
TEP1	HsaEX0064477	chr14:20849712-20849845	134	chr14:20850072,20849712-20849845,20849560	S	69	96	45.51	14.89	100	85.11	PanAS
ME3	HsaEX0038478	chr11:86168431-86168801	371	chr11:86176133,86168408+86168431-86168801,86161440	C1	69	96	46.64	3.16	100	96.84	PanAS
C8orf44	HsaEX0011544	chr8:67588980-67589137	158	chr8:67579936,67588980-67589137,67591956	C2	69	96	28.08	0	73.03	73.03	PanAS
TLR4	HsaEX0065160	chr9:120470841-120471007	167	chr9:120466843,120470841-120471007,120474667	C1	69	96	74.41	25	100	75	PanAS
RP11-1023L17.1	HsaEX0054358	chr5:34175550-34175642	93	chr5:34175927,34175550-34175642,34169258	S	68	96	71.35	44.14	95.65	51.51	PanAS
IL4R	HsaEX0031497	chr16:27341387-27341519	133	chr16:27325138+27325341+27325552,27341387-27341519,27351507	S	68	96	71.68	47.31	95.76	48.45	PanAS
AC069513.3	HsaEX0001305	chr3:195428251-195428540	290	chr3:195426078+195426142,195428251-195428540+195428875,195435005+195435009	C2	68	96	29.67	0	73.83	73.83	PanAS
ELMO2	HsaEX0022151	chr20:45027336-45027410	75	chr20:45035187,45027336-45027410,45023171	C2	68	96	58.28	7.49	92.89	85.4	PanAS
RPL23AP53	HsaEX0055499	chr8:169290-169417	128	chr8:182129,169290-169417,163710	C2	67	96	65.17	30.1	94.49	64.39	PanAS
ALG11	HsaEX0003664	chr13:52598722-52599073	352	chr13:52586598+52586710,52598722-52599073,52602455	C1	67	96	61.16	23.02	92.27	69.25	PanAS
MIER1	HsaEX0039267	chr1:67394612-67394646	35	chr1:67391925,67394570+67394573+67394612-67394646,67405711	S	57	96	35.17	6.98	78.55	71.57	PanAS
C1orf159	HsaEX0010160	chr1:1019295-1019396	102	chr1:1019733,1019295-1019396+1019466,1018367	S	57	96	34.62	3.45	81.05	77.6	PanAS
ZNF618	HsaEX0074061	chr9:116791190-116791252	63	chr9:116779064,116791013+116791106+116791190-116791252,116794925+116794928	S	57	96	49.92	13.48	100	86.52	PanAS
ZNF568	HsaEX0073958	chr19:37413488-37413748	261	chr19:37408550,37413488-37413748,37416102	C1	57	96	70.43	28.21	95.65	67.44	PanAS
RP4-798C17.6	HsaEX0055335	chr7:144008977-144009029	53	chr7:144040280,144008977-144009029+144009032,144008797	C1	57	96	56.51	2.16	100	97.84	PanAS
SULF1	HsaEX0062857	chr8:70408000-70408161	162	chr8:70405360,70408000-70408161,70414109	C2	57	96	33.53	0.63	58	57.37	PanAS
ZNF772	HsaEX0074328	chr19:57987028-57987154	127	chr19:57988002,57987028-57987154,57985789	C1	57	96	48.1	10.14	95.19	85.05	PanAS
MRRF	HsaEX0040215	chr9:125027741-125027824	84	chr9:125027217,125027741-125027824+125028059,125033143+125033232	S	56	96	26.01	8.91	100	91.09	PanAS
AC004507.1	HsaEX0000829	chr5:126392089-126392198	110	chr5:126394574,126392089-126392198,126388361	S	56	96	29.04	0.77	60.44	59.67	PanAS
ZNF23	HsaEX0073212	chr16:71489975-71490024	50	chr16:71490667,71489975-71490024,71488071	C2	56	96	34.33	5.36	74.79	69.43	PanAS
CCDC91	HsaEX0013538	chr12:28379073-28379132	60	chr12:28378794,28379073-28379132,28408514	C1	55	96	44.12	2.7	87.79	85.09	PanAS
SLC25A23	HsaEX0059042	chr19:6438458-6438545	88	chr19:6444162,6438458-6438545,6436475+6436479	C1	55	96	64.11	32.02	100	67.98	PanAS
RALGPS1	HsaEX0052089	chr9:129958753-129958910	158	chr9:129957496,129958753-129958910,129972974+129972977	C1	55	96	51.61	14.33	93.34	79.01	PanAS
VSIG10	HsaEX0070709	chr12:118540794-118540975	182	chr12:118541398,118540794-118540975,118533619	S	55	96	46.02	2.87	93.92	91.05	PanAS
ZNF33B	HsaEX0073466	chr10:43109730-43109806	77	chr10:43127377,43109730-43109806,43090147	C1	55	96	45.24	8.44	89.94	81.5	PanAS
AC055839.1	HsaEX0001261	chr17:5417711-5418364	654	chr17:5418793,5417711-5418364+5418393,5405192	C2	54	96	27.62	5.26	66.6	61.34	PanAS
ACTR3B	HsaEX0002174	chr7:152480272-152480327	56	chr7:152457011,152480272-152480327,152497616	C1	54	96	67.28	32.14	100	67.86	PanAS
ENSA	HsaEX0022522	chr1:150598955-150599002	48	chr1:150599500+150599788+150599874+150599943,150598955-150599002,150598278+150598284	S	54	96	57.78	2.13	90.48	88.35	PanAS
GLB1L	HsaEX0027562	chr2:220104642-220104816	175	chr2:220107236,220104642-220104816,220104555	C2	54	96	68.75	38.46	97.37	58.91	PanAS
UTY	HsaEX0070154	chrY:15470968-15471102	135	chrY:15471647,15470968-15471102,15469849	C1	54	96	37.53	0	86.64	86.64	PanAS
MORN1	HsaEX0039818	chr1:2321364-2321435	72	chr1:2322897,2321364-2321435,2319776	S	54	96	64.95	20.93	95.42	74.49	PanAS
C7orf44	HsaEX0011454	chr7:43670783-43671381	599	chr7:43679048,43670611+43670783-43671381,43649094+43649240	C1	53	96	40.8	7.32	93.71	86.39	PanAS
RIN2	HsaEX0053697	chr20:19851726-19851939	214	chr20:19780391,19851726-19851939,19870210	S	53	96	26.35	0	54.39	54.39	PanAS
TSNARE1	HsaEX0067593	chr8:143361221-143361685	465	chr8:143365774,143361221-143361685,143356220+143356224	S	53	96	64.52	22.5	96.04	73.54	PanAS
GLT8D2	HsaEX0027727	chr12:104415135-104415269	135	chr12:104443673,104415135-104415269,104413454	S	52	96	68.3	0	90.82	90.82	PanAS
PDE9A	HsaEX0046318	chr21:44151880-44152059	180	chr21:44119121,44151880-44152059,44152180	S	52	96	58.16	20	100	80	PanAS
GS1-124K5.2	HsaEX0028799	chr7:65904122-65904291	170	chr7:65915058,65904122-65904291,65895004	C1	52	96	56.02	7.95	95.31	87.36	PanAS
GCNT1	HsaEX0027243	chr9:79074976-79075093	118	chr9:79074221,79074976-79075093,79115832	C1	52	96	35.22	5.18	75	69.82	PanAS
TMEM220	HsaEX0065730	chr17:10632348-10632377	30	chr17:10633097,10632348-10632377,10629581	S	52	96	71.89	27.24	100	72.76	PanAS
PTPRC	HsaEX0051103	chr1:198668693-198668833	141	chr1:198661502,198668693-198668833,198672427	C2	51	96	38.86	1.85	74.5	72.65	PanAS
C16orf93	HsaEX0009730	chr16:30770499-30770568	70	chr16:30771605,30770499-30770568,30768975	C2	51	96	58.51	19.8	91.29	71.49	PanAS
ULK4	HsaEX0069304	chr3:41957469-41957544	76	chr3:41959949,41957469-41957544,41954391	S	50	96	50.56	14.89	100	85.11	PanAS
ST3GAL6	HsaEX0061981	chr3:98475213-98475384	172	chr3:98451376+98451587+98451855,98475213-98475384,98487274+98487283	C1	49	96	30.53	8.52	61.74	53.22	PanAS
RASSF8	HsaEX0052495	chr12:26147970-26148063	94	chr12:26112081,26147970-26148063,26208169+26208212	S	49	96	68.32	43.86	95.24	51.38	PanAS
RPGRIP1L	HsaEX0055475	chr16:53672222-53672323	102	chr16:53674945,53672222-53672323,53671766	S	48	96	44.53	8.47	100	91.53	PanAS
BAI2	HsaEX0007571	chr1:32200784-32200882	99	chr1:32201181,32200784-32200882,32198644+32198744	S	48	96	30.36	6.25	72.97	66.72	PanAS
AC008083.1	HsaEX0000958	chr12:47600294-47600368	75	chr12:47603064,47600294-47600368+47600371,47599852+47599928	C2	48	96	63.94	30.11	100	69.89	PanAS
CS	HsaEX0017403	chr12:56685415-56685577	163	chr12:56692393,56685415-56685577,56680429	C1	48	96	37.04	10.64	100	89.36	PanAS
RASSF1	HsaEX0052471	chr3:50374604-50375003	400	chr3:50375336,50374604-50375003,50369585	S	48	96	47.54	5.05	98.01	92.96	PanAS
ZIM2	HsaEX0072814	chr19:57337756-57337831	76	chr19:57347386,57337756-57337831,57335795	C1	48	96	43.13	0	89.56	89.56	PanAS
AC004463.1	HsaEX0000821	chr22:19175070-19175240	171	chr22:19175493,19175070-19175240,19171124	S	48	96	58.89	23.9	93.59	69.69	PanAS
STEAP4	HsaEX0062393	chr7:87920231-87920329	99	chr7:87936107,87920231-87920329,87913586	S	47	96	29.99	7.27	59.04	51.77	PanAS
CIITA	HsaEX0015394	chr16:10995895-10996041	147	chr16:10995415+10995428,10995655+10995895-10996041,10996515	S	47	96	72.99	30.77	93.55	62.78	PanAS
BRCA1	HsaEX0008378	chr17:41249261-41249306	46	chr17:41251792,41249261-41249306,41246877	C2	47	96	72.72	51.63	100	48.37	PanAS
ZNF26	HsaEX0073272	chr12:133564251-133564354	104	chr12:133563459,133564251-133564354,133583628	C2	47	96	45.25	4.23	84.13	79.9	PanAS
THAP5	HsaEX0064769	chr7:108206396-108206466	71	chr7:108209543,108206396-108206466,108205549	C2	47	96	33.03	4.23	96.89	92.66	PanAS
TTC32	HsaEX0067916	chr2:20101237-20101353	117	chr2:20101467,20101237-20101353,20097796	S	47	96	43.94	8.62	73.15	64.53	PanAS
SLC41A1	HsaEX0059667	chr1:205781936-205782300	365	chr1:205782378+205782823,205781936-205782300,205780215	S	46	96	59.36	12.33	92.03	79.7	PanAS
CYB561D1	HsaEX0018161	chr1:110037142-110037245	104	chr1:110036776+110036909,110037142-110037245,110037765	C1	46	96	42	12.57	100	87.43	PanAS
RP11-61L23.2	HsaEX0055060	chr7:143530822-143530973	152	chr7:143533729+143533733,143530340+143530822-143530973+143530976,143510866+143510872	C1	46	96	40.49	5.88	98.35	92.47	PanAS
ARMCX5	HsaEX0005973	chrX:101894328-101894461	134	chrX:101860581,101894328-101894461,101904882	C2	46	96	61.52	20.05	92.41	72.36	PanAS
CALML4	HsaEX0012181	chr15:68497459-68497489	31	chr15:68497583,68497459-68497489,68492019	C1	46	96	68.48	33.5	100	66.5	PanAS
SP110	HsaEX0061102	chr2:231041191-231041440	250	chr2:231042254,231041191-231041440,231037675	S	46	96	55.29	2.99	91.93	88.94	PanAS
C22orf36	HsaEX0010619	chr22:24988184-24988390	207	chr22:24988830,24988184-24988390,24985917	S	45	96	37.59	2.78	67.98	65.2	PanAS
C15orf58	HsaEX0009597	chr15:90779295-90779413	119	chr15:90777828,90779295-90779413,90781724	S	45	96	27.38	0	75.76	75.76	PanAS
MYBL1	HsaEX0040881	chr8:67478299-67478478	180	chr8:67478919,67478299-67478478,67477060	S	45	96	30.44	5.26	61.04	55.78	PanAS
ZBTB25	HsaEX0072131	chr14:64969371-64969533	163	chr14:64969619,64969287+64969371-64969533,64957258	C2	45	96	32.31	0	62.16	62.16	PanAS
NEDD1	HsaEX0042401	chr12:97301480-97301634	155	chr12:97301078+97301100,97301480-97301634,97303530	C2	45	96	40.26	0.94	72.48	71.54	PanAS
ZBTB49	HsaEX0072189	chr4:4307865-4307911	47	chr4:4304818,4307865-4307911,4314768+4314772	S	45	96	39.7	9.09	78.38	69.29	PanAS
RP11-267N12.3	HsaEX0054571	chr1:163278334-163278421	88	chr1:163288972,163278334-163278421,163276119	C2	45	96	53.24	16.18	93.33	77.15	PanAS
NEK11	HsaEX0042503	chr3:130746774-130746846	73	chr3:130745850+130746031+130746046+130746062,130746774-130746846,130748457	S	28	96	49.45	27.27	100	72.73	PanAS
BRSK2	HsaEX0008510	chr11:1469028-1469093	66	chr11:1467137,1469028-1469093,1471006	S	28	96	33.37	4.35	52.04	47.69	PanAS
NPAS1	HsaEX0043455	chr19:47542335-47542409	75	chr19:47539387,47542294+47542335-47542409,47543702	C2	28	96	79.64	50	92.99	42.99	PanAS
DYRK1A	HsaEX0021336	chr21:38787792-38787867	76	chr21:38782972,38787792-38787867,38792601	C2	28	96	25.63	0	52.16	52.16	PanAS
C2orf63	HsaEX0010751	chr2:55435762-55435846	85	chr2:55436540,55435762-55435846,55433512	C2	28	96	43.21	8.9	86.03	77.13	PanAS
ZNF519	HsaEX0073851	chr18:14105033-14106408	1376	chr18:14132274,14105033-14106408,14085075	C2	28	96	37.98	6.38	80.42	74.04	PanAS
PDDC1	HsaEX0046161	chr11:770314-770398	85	chr11:771333,770314-770398,767368+767373	C2	28	96	27.9	8.56	56.92	48.36	PanAS
C1orf116	HsaEX0010124	chr1:207200839-207201024	186	chr1:207205924+207206052,207200839-207201024,207196822+207196825	C2	28	96	55.73	33.62	91.78	58.16	PanAS
CCDC30	HsaEX0013204	chr1:43002147-43002272	126	chr1:42964587,43002147-43002272,43031967	C2	28	96	37.91	10.89	97.51	86.62	PanAS
PPAPDC1A	HsaEX0049267	chr10:122273423-122273513	91	chr10:122263438,122273423-122273513,122334643	C2	28	96	75.96	51.05	93.94	42.89	PanAS
CTD-2230D16.1	HsaEX0017750	chr3:64957848-64957971	124	chr3:64852932,64957848-64957971,64994620	C3	28	96	20.26	5.56	37.5	31.94	PanAS
C13orf18	HsaEX0009289	chr13:46952025-46952140	116	chr13:46961269,46952025-46952140,46946732	C1	28	96	39.49	9.57	67.27	57.7	PanAS
NLGN4Y	HsaEX0043083	chrY:16831339-16831398	60	chrY:16734471,16831339-16831398,16834997	S	28	96	59.48	13.19	90.57	77.38	PanAS
WIZ	HsaEX0071545	chr19:15553487-15553559	73	chr19:15558914,15553487-15553559,15547940	S	27	96	39.42	9.8	86.81	77.01	PanAS
STK33	HsaEX0062509	chr11:8498797-8498830	34	chr11:8615291+8615630,8498797-8498830,8496363+8496613	C2	27	96	37.04	0	88.27	88.27	PanAS
NPAS1	HsaEX0043456	chr19:47542665-47542812	148	chr19:47539387,47542662+47542665-47542812+47542822,47543702	C2	27	96	79.99	58.21	93.43	35.22	PanAS
ZDHHC24	HsaEX0072526	chr11:66291626-66291747	122	chr11:66311175,66291626-66291747,66288937	C2	27	96	53.36	0	74.15	74.15	PanAS
C3orf55	HsaEX0010926	chr3:157287096-157287231	136	chr3:157271129,157287096-157287231,157288966	S	27	96	32.45	7.69	56.6	48.91	PanAS
ZNF730	HsaEX0074274	chr19:23278346-23278470	125	chr19:23258189,23278346-23278470+23278501,23281142	C2	27	96	48.29	7.69	87.69	80	PanAS
RP13-507I23.1	HsaEX0055214	chrX:149111869-149111980	112	chrX:149110065,149111869-149111980,149112236+149112279	C2	27	96	28.82	5.1	55.73	50.63	PanAS
FKBP5	HsaEX0025850	chr6:35646735-35646851	117	chr6:35647948,35646735-35646851,35640536	C3	27	96	28.14	0	58.82	58.82	PanAS
TFEC	HsaEX0064646	chr7:115614224-115614310	87	chr7:115624316,115614224-115614310,115596847	S	27	96	74.51	54.59	93.78	39.19	PanAS
TCEANC	HsaEX0064127	chrX:13679150-13679241	92	chrX:13677887,13679147+13679150-13679241,13680620	C1	27	96	36.07	9.09	64.69	55.6	PanAS
CHEK1	HsaEX0015141	chr11:125526101-125526230	130	chr11:125525242,125526101-125526230,125545823	S	26	96	59.56	17.57	100	82.43	PanAS
NRG4	HsaEX0043816	chr15:76251363-76251481	119	chr15:76254169,76251363-76251481,76248352	S	26	96	32.4	4.76	77.27	72.51	PanAS
AC131097.3	HsaEX0001600	chr2:242876244-242876361	118	chr2:242824786,242876225+242876244-242876361,242908078	S	26	96	55.79	33.31	94.42	61.11	PanAS
NAV3	HsaEX0041775	chr12:78388583-78388651	69	chr12:78362482,78388583-78388651,78392117	S	26	96	67.55	36.84	100	63.16	PanAS
EMR2	HsaEX0022413	chr19:14866466-14866656	191	chr19:14867050,14866466-14866656+14866689,14863338	C3	26	96	66.48	24.45	91.07	66.62	PanAS
MED12L	HsaEX0038545	chr3:150910337-150910441	105	chr3:150908718,150910337-150910441,150911277	C1	26	96	39.94	12.38	100	87.62	PanAS
NTRK2	HsaEX0044091	chr9:87284595-87284803	209	chr9:87284338,87284595-87284803+87284880+87285136,87285292	S	26	96	53.25	20.68	98.75	78.07	PanAS
GRIA1	HsaEX0028617	chr5:153175036-153175150	115	chr5:153149975,153175036-153175150,153181916	C3	26	96	62.38	6.05	89.74	83.69	PanAS
RP1-67M12.1	HsaEX0054336	chr6:22174227-22174291	65	chr6:22111047+22111149,22174227-22174291,22191796	C1	26	96	41.22	10.02	97.88	87.86	PanAS
RP11-318M2.2	HsaEX0054632	chr8:104279470-104279748	279	chr8:104280619,104279470-104279748,104258912	C3	26	96	34.5	13.92	90.96	77.04	PanAS
SDR42E1	HsaEX0056785	chr16:82041246-82041473	228	chr16:82044992,82041246-82041473,82034489	S	26	96	44.24	6.82	86.93	80.11	PanAS
CD33	HsaEX0013832	chr19:51728474-51728854	381	chr19:51728411,51728474-51728854,51729059	S	25	96	71.77	42.14	95.35	53.21	PanAS
TARDBP	HsaEX0063656	chr1:11085608-11085722	115	chr1:11085265,11085608-11085722,11089744	S	25	96	51.7	22.73	92.31	69.58	PanAS
SIGLEC12	HsaEX0058285	chr19:51918078-51918362	285	chr19:51918435,51917901+51918078-51918362,51917769+51917789	S	25	96	60.09	34.07	100	65.93	PanAS
AC005083.1	HsaEX0000859	chr7:20257411-20257481	71	chr7:20257245,20257411-20257481,20257879	S	25	96	46.33	25.49	92.36	66.87	PanAS
CDKL3	HsaEX0014390	chr5:133685940-133686118	179	chr5:133706689+133706704,133685904+133685940-133686118,133657594	C2	25	96	33.96	0	81.96	81.96	PanAS
LYPD6B	HsaEX0037061	chr2:150017278-150017349	72	chr2:149987467,150017278-150017349,150061767	C1	25	96	46.17	8.35	78.82	70.47	PanAS
PPAPDC1A	HsaEX0049268	chr10:122278345-122278408	64	chr10:122263438,122278345-122278408,122334643	C3	25	96	68.8	35.78	91.84	56.06	PanAS
AC097500.2	HsaEX0001450	chr2:186923484-186923696	213	chr2:186946057,186923484-186923696,186904282	C1	25	96	22.92	8.74	40.79	32.05	PanAS
RP4-798C17.6	HsaEX0055338	chr7:143949389-143949585	197	chr7:143951527,143949389-143949585,143948703	C1	25	96	45.92	3.17	66.26	63.09	PanAS
ARMCX4	HsaEX0005967	chrX:100700986-100701032	47	chrX:100673988,100700986-100701032,100741010+100741013	C3	24	96	42.25	17.82	96	78.18	PanAS
DHDH	HsaEX0019488	chr19:49439289-49439452	164	chr19:49438368,49439289-49439452,49442706	S	23	96	54.55	14.94	90.48	75.54	PanAS
AF127936.7	HsaEX0002909	chr21:16225595-16225752	158	chr21:16229863,16225595-16225752,16197945	S	23	96	49.92	8.33	87.5	79.17	PanAS
P2RY6	HsaEX0045111	chr11:73006775-73006860	86	chr11:72983511,73006775-73006860,73007530	C1	23	96	67.41	28.57	94.07	65.5	PanAS
LIG4	HsaEX0035785	chr13:108867832-108868091	260	chr13:108870510,108867832-108868091+108868188,108863564+108863644	C3	23	96	40.4	9.26	73.55	64.29	PanAS
PEAR1	HsaEX0046539	chr1:156871980-156872077	98	chr1:156863629,156871980-156872077,156873649+156873653+156873710	S	23	96	64.67	41.72	100	58.28	PanAS
AC092295.7	HsaEX0001395	chr19:37068043-37068139	97	chr19:37065802,37068043-37068139+37068185,37084748	S	23	96	60	32.66	92.65	59.99	PanAS
RP11-413E6.8	HsaEX0054770	chr3:75722998-75723157	160	chr3:75722389,75722998-75723157,75724915	C1	23	96	42.86	10.53	90.48	79.95	PanAS
CTC-564N23.3	HsaEX0017716	chr5:76385171-76385228	58	chr5:76383444,76385171-76385228,76414145	C3	23	96	33.95	3.03	66.68	63.65	PanAS
CA13	HsaEX0011807	chr8:86137184-86137524	341	chr8:86133354,86137184-86137524,86142314	S	23	96	73.19	45.01	90.77	45.76	PanAS
HNRNPK	HsaEX0030300	chr9:86595068-86595197	130	chr9:86595418,86595068-86595197,86593367	S	108	95	31.6	0	64.57	64.57	PanAS
STAG2	HsaEX0062178	chrX:123224704-123224814	111	chrX:123224614,123224704-123224814,123227868	S	106	95	25.55	6.36	63.37	57.01	PanAS
GOLGA2	HsaEX0027950	chr9:131029473-131029538	66	chr9:131029737,131029473-131029538+131029553,131028604	S	106	95	49.61	7.44	96.01	88.57	PanAS
AC091565.3	HsaEX0001371	chr15:23306734-23306791	58	chr15:23308564,23306734-23306791,23303947	S	105	95	32.99	6.98	65.65	58.67	PanAS
VEZT	HsaEX0070328	chr12:95650326-95650398	73	chr12:95645847,95650326-95650398,95650926+95650930	C1	105	95	41.28	4.68	91.14	86.46	PanAS
TRAPPC6B	HsaEX0066944	chr14:39623415-39623498	84	chr14:39627489,39623415-39623498,39621043	S	104	95	77.07	57.58	95.4	37.82	PanAS
MORF4L2	HsaEX0039815	chrX:102941559-102941675	117	chrX:102942917,102941559-102941675,102940188	S	104	95	59.12	0.33	92.41	92.08	PanAS
PTBP1	HsaEX0050725	chr19:805513-805569	57	chr19:805187,805492+805513-805569,806408	S	103	95	71.87	9.01	94.54	85.53	PanAS
SLMAP	HsaEX0060182	chr3:57850969-57851019	51	chr3:57850584,57850969-57851019,57875768+57875773	C3	103	95	23.49	5.26	67.24	61.98	PanAS
C14orf153	HsaEX0009422	chr14:104158696-104158762	67	chr14:104145855+104145882,104158696-104158762,104166992	C3	102	95	30.42	1.39	66.67	65.28	PanAS
SSFA2	HsaEX0061840	chr2:182785324-182785377	54	chr2:182784173,182785324-182785377+182785389,182786675	S	101	95	74.28	30.61	96.95	66.34	PanAS
STAMBP	HsaEX0062231	chr2:74056532-74056637	106	chr2:74056123+74056197,74056532-74056637,74057972	C1	101	95	29.84	1.81	73.81	72	PanAS
TAF1	HsaEX0063414	chrX:70679000-70679101	102	chrX:70678207+70678216,70679000-70679101,70679402	S	100	95	24.34	0.51	65.12	64.61	PanAS
ZFYVE19	HsaEX0072735	chr15:41104911-41105100	190	chr15:41102955,41104897+41104911-41105100,41105536	S	100	95	72.31	42.72	97.22	54.5	PanAS
TCOF1	HsaEX0064236	chr5:149771107-149771220	114	chr5:149769586,149771107-149771220+149771358,149771520	S	100	95	73.7	35.32	100	64.68	PanAS
ENOSF1	HsaEX0022477	chr18:678696-678737	42	chr18:683246,678696-678737,675402	C2	100	95	67.49	29.72	97.69	67.97	PanAS
PQLC1	HsaEX0049862	chr18:77679184-77679400	217	chr18:77693969,77679184-77679400,77664183	C2	100	95	75.9	44.77	96.61	51.84	PanAS
FTSJ2	HsaEX0026541	chr7:2277650-2278572	923	chr7:2279053,2277650-2278572,2275199	C1	99	95	25.27	3.56	78.72	75.16	PanAS
MTMR3	HsaEX0040616	chr22:30418018-30418128	111	chr22:30416873,30418018-30418128,30418598	S	98	95	71.82	31.09	95.69	64.6	PanAS
RAB9A	HsaEX0051743	chrX:13721933-13722021	89	chrX:13707407,13721933-13722021,13726840	S	98	95	72.51	3.23	93.31	90.08	PanAS
CDK10	HsaEX0014255	chr16:89755660-89755732	73	chr16:89753205,89755660-89755732,89756961	C2	98	95	70.09	21.73	97.61	75.88	PanAS
REV1	HsaEX0053113	chr2:100048203-100048402	200	chr2:100050794,100048203-100048402,100046407+100046410	S	97	95	21.14	1.69	55.77	54.08	PanAS
C16orf35	HsaEX0009621	chr16:167300-167374	75	chr16:169125,167300-167374,162774	C1	97	95	68.07	17.39	100	82.61	PanAS
MBD1	HsaEX0038067	chr18:47797839-47797910	72	chr18:47799047,47797839-47797910,47796188	C1	97	95	64.97	29.45	96.43	66.98	PanAS
BPTF	HsaEX0008352	chr17:65882247-65882432	186	chr17:65871136,65882244+65882247-65882432,65887960+65887963	C2	96	95	53.38	26.82	97.06	70.24	PanAS
HNRNPH3	HsaEX0030296	chr10:70098401-70098444	44	chr10:70098399,70098260+70098401-70098444,70098897	S	96	95	55.54	0	91.32	91.32	PanAS
CEP170	HsaEX0014725	chr1:243349081-243349374	294	chr1:243349561,243349081-243349374,243336148	S	95	95	69.44	25.93	97.06	71.13	PanAS
RNASEN	HsaEX0053821	chr5:31531557-31531628	72	chr5:31532097,31531557-31531628+31531632,31531031	S	95	95	69.19	39.96	99.07	59.11	PanAS
RP11-357C3.3	HsaEX0054680	chrX:62736790-62736962	173	chrX:62780712,62736790-62736962,62652371+62652841	C1	95	95	29.43	5.26	71.65	66.39	PanAS
POLB	HsaEX0048868	chr8:42196530-42196587	58	chr8:42196203,42196530-42196587,42202471	S	95	95	61.81	29.31	97.99	68.68	PanAS
DIS3	HsaEX0019777	chr13:73354984-73355141	158	chr13:73355743,73354984-73355141,73352518	C3	94	95	65.26	18.87	92.21	73.34	PanAS
TRAPPC6A	HsaEX0066936	chr19:45668385-45668452	68	chr19:45681351+45681393,45668385-45668452,45668228	S	93	95	72.39	42.03	100	57.97	PanAS
POLM	HsaEX0048986	chr7:44116108-44116228	121	chr7:44118153+44118339+44118355,44115706+44116108-44116228+44116354,44114121+44114129	C1	93	95	70.46	30.56	100	69.44	PanAS
POLL	HsaEX0048977	chr10:103345073-103345235	163	chr10:103345619+103345623,103345073-103345235,103342648	C3	93	95	68.81	15.67	95.51	79.84	PanAS
PINX1	HsaEX0047656	chr8:10677703-10677779	77	chr8:10683662,10677703-10677779,10623426	S	93	95	67.87	31.67	100	68.33	PanAS
ST6GALNAC6	HsaEX0062046	chr9:130660235-130660289	55	chr9:130661782,130660235-130660289,130658611	C1	92	95	42.5	3.6	91.28	87.68	PanAS
SCMH1	HsaEX0056513	chr1:41499655-41499720	66	chr1:41503034,41499655-41499720+41499774+41499791,41494398+41494417	S	91	95	60.79	24.18	100	75.82	PanAS
EDC3	HsaEX0021558	chr15:74979432-74979520	89	chr15:74988221,74979432-74979520,74967483	C3	91	95	20.7	2.18	53.23	51.05	PanAS
ATG13	HsaEX0006553	chr11:46651595-46651650	56	chr11:46639440,46651595-46651650,46665829	C1	91	95	78.12	52.35	94.72	42.37	PanAS
DCAF17	HsaEX0018618	chr2:172314882-172314987	106	chr2:172314585,172314882-172314987,172325398	C1	88	95	29.06	7.14	80.49	73.35	PanAS
PARD3	HsaEX0045505	chr10:34573063-34573173	111	chr10:34606035,34573063-34573173,34558827	S	88	95	77.71	50.68	100	49.32	PanAS
BMP2K	HsaEX0008213	chr4:79808332-79808438	107	chr4:79800045,79808328+79808332-79808438,79831764	S	87	95	70.23	12.45	94.67	82.22	PanAS
TBC1D25	HsaEX0063865	chrX:48403257-48403411	155	chrX:48399826+48399830+48399901,48403257-48403411,48417285	C1	87	95	74.22	51.85	100	48.15	PanAS
C1orf9	HsaEX0010350	chr1:172522400-172522510	111	chr1:172520766+172520770,172522400-172522510,172525009	S	87	95	65.22	15.22	95.06	79.84	PanAS
ATXN2L	HsaEX0007272	chr16:28847770-28847806	37	chr16:28847443+28847497,28847647+28847770-28847806+28847811,28847919+28848049+28848069+28848072	S	86	95	43.63	0	76.65	76.65	PanAS
HDAC10	HsaEX0029369	chr22:50688856-50688928	73	chr22:50689200,50688856-50688928+50688952,50688589	S	86	95	61.88	9.58	99.19	89.61	PanAS
RGS12	HsaEX0053361	chr4:3430285-3430438	154	chr4:3429896,3430285-3430438,3432134	S	86	95	64.42	30.07	98.01	67.94	PanAS
RBM4	HsaEX0052715	chr11:66424607-66424730	124	chr11:66419923,66424607-66424730,66433327	C3	86	95	30.55	3.12	69.25	66.13	PanAS
MYO9A	HsaEX0041285	chr15:72311380-72311436	57	chr15:72313259,72311380-72311436,72302788	S	83	95	68.15	31.91	95.74	63.83	PanAS
FAHD2A	HsaEX0023712	chr2:96078643-96078867	225	chr2:96078512,96078643-96078867,96079714	S	83	95	72.8	41.82	94.49	52.67	PanAS
USPL1	HsaEX0070066	chr13:31195210-31195358	149	chr13:31192193,31195210-31195358+31195376,31195901	C1	83	95	32.8	0	95	95	PanAS
C11orf30	HsaEX0008976	chr11:76250643-76250684	42	chr11:76248994,76250643-76250684,76253054+76253212+76253260+76253264	S	83	95	66.67	24.64	100	75.36	PanAS
SNRK	HsaEX0060692	chr3:43341246-43341307	62	chr3:43328167,43341246-43341307,43344590	C1	83	95	70.17	24.5	94.27	69.77	PanAS
CROCC	HsaEX0017300	chr1:17266389-17266588	200	chr1:17265637,17266389-17266588,17270595	S	82	95	66	14.98	95.24	80.26	PanAS
MOSPD1	HsaEX0039848	chrX:134025509-134025670	162	chrX:134030847,134025509-134025670,134023222	S	82	95	58.04	8.11	97.65	89.54	PanAS
GABPB1	HsaEX0026773	chr15:50638569-50638592	24	chr15:50647182,50638569-50638592,50601995	S	82	95	22.84	5.56	39.76	34.2	PanAS
RREB1	HsaEX0055741	chr6:7240671-7240835	165	chr6:7232140,7240671-7240835,7246657	S	82	95	39.45	0	76.24	76.24	PanAS
HMGN1	HsaEX0030214	chr21:40719305-40719404	100	chr21:40720218,40719305-40719404+40719409,40717200	C1	82	95	62.77	9.28	100	90.72	PanAS
C10orf18	HsaEX0008809	chr10:5754357-5754502	146	chr10:5727138,5754357-5754502,5754786	C2	81	95	56.3	16.05	96.26	80.21	PanAS
FOXN2	HsaEX0026248	chr2:48555700-48555841	142	chr2:48541953,48555700-48555841,48573340	S	81	95	32.54	0	83.97	83.97	PanAS
ZNF343	HsaEX0073482	chr20:2467287-2467409	123	chr20:2473345,2467287-2467409,2465302	C2	81	95	23.51	0	45.95	45.95	PanAS
MLH3	HsaEX0039447	chr14:75506614-75506718	105	chr14:75508318,75506614-75506718,75505115	C1	80	95	70.36	24.1	100	75.9	PanAS
GIPC1	HsaEX0027490	chr19:14603669-14603724	56	chr19:14606849,14603669-14603724,14602555	C1	80	95	65.7	30.1	94.29	64.19	PanAS
SEMA4D	HsaEX0057112	chr9:92032971-92033033	63	chr9:92070803,92032971-92033033,92020614	C1	80	95	70.22	36.84	100	63.16	PanAS
DYRK2	HsaEX0021345	chr12:68043577-68043725	149	chr12:68042962,68043577-68043725,68050886	S	80	95	67.74	19.63	100	80.37	PanAS
FRMD4A	HsaEX0026373	chr10:13735482-13735517	36	chr10:13735898,13735482-13735517,13717044	S	79	95	26.61	3.99	58.83	54.84	PanAS
RP11-206L10.11	HsaEX0054529	chr1:783034-783186	153	chr1:764484,783034-783186+783216,787307	C1	79	95	64.34	12.96	100	87.04	PanAS
VPRBP	HsaEX0070404	chr3:51526405-51526504	100	chr3:51533889,51526405-51526504,51517852	C2	79	95	33.13	4.75	80.04	75.29	PanAS
QTRTD1	HsaEX0051501	chr3:113775846-113775953	108	chr3:113775711,113775846-113775953,113784084	S	79	95	29.15	2.31	56.1	53.79	PanAS
SMARCA4	HsaEX0060278	chr19:11075983-11075985	3	chr19:11071850,11075983-11075985,11094800	MIC	79	95	64.85	28.71	100	71.29	PanAS
MTRF1	HsaEX0040719	chr13:41836351-41836467	117	chr13:41837621+41837703,41836184+41836351-41836467+41836471,41835011+41835051	C2	78	95	38.43	3.08	81.06	77.98	PanAS
CTBP2	HsaEX0017674	chr10:126799559-126799662	104	chr10:126848888,126799534+126799559-126799662,126727724	C2	78	95	66.37	7.41	92.15	84.74	PanAS
TBL1X	HsaEX0064031	chrX:9621585-9621729	145	chrX:9608400,9621585-9621729,9622255	S	77	95	54.89	0	95.35	95.35	PanAS
MBD5	HsaEX0038093	chr2:148811960-148812018	59	chr2:148779253,148811960-148812018,148936269	S	77	95	25.64	0.49	66.32	65.83	PanAS
PXDN	HsaEX0051382	chr2:1691404-1691475	72	chr2:1695700,1691404-1691475,1687923	S	76	95	73.08	48.96	97.48	48.52	PanAS
IRF7	HsaEX0032238	chr11:614174-614399	226	chr11:614476,614174-614399,614037	C1	76	95	66.05	22.28	100	77.72	PanAS
IFFO1	HsaEX0030919	chr12:6658642-6658647	6	chr12:6658922,6658642-6658647+6658650,6657991	MIC	76	95	52.57	9.66	98.16	88.5	PanAS
MEMO1	HsaEX0038824	chr2:32118311-32118390	80	chr2:32142995,32118311-32118390,32095021	C3	75	95	32.1	4.23	68.42	64.19	PanAS
WDSUB1	HsaEX0071444	chr2:160128213-160128306	94	chr2:160132057,160128213-160128306,160116354	C1	75	95	66.09	10.9	95.26	84.36	PanAS
DNAJC25	HsaEX0020337	chr9:114405137-114405374	238	chr9:114394023,114405137-114405374,114409387	S	75	95	54.86	9.4	97.65	88.25	PanAS
CEP192	HsaEX0014752	chr18:13037236-13037300	65	chr18:13030607,13037236-13037300,13048858	C2	74	95	68.35	27.87	100	72.13	PanAS
CCDC126	HsaEX0012970	chr7:23643761-23643898	138	chr7:23637670,23643705+23643761-23643898,23650790	C1	74	95	23.24	0	77.86	77.86	PanAS
C7orf44	HsaEX0011453	chr7:43672878-43673007	130	chr7:43679048,43672878-43673007,43649094+43649240	C2	73	95	26.46	6.25	70.69	64.44	PanAS
ANUBL1	HsaEX0004717	chr10:46148432-46148507	76	chr10:46158990,46148432-46148507,46147481	C1	73	95	63.25	21.7	96.72	75.02	PanAS
LRRC37B	HsaEX0036592	chr17:30348463-30349844	1382	chr17:30335151,30348412+30348463-30349844,30351730	C2	73	95	67.71	29.03	100	70.97	PanAS
RP11-452F19.3	HsaEX0054855	chr1:223000770-223000943	174	chr1:222997287,223000770-223000943,223008461	C1	73	95	28.84	5.97	76.19	70.22	PanAS
LARGE	HsaEX0035329	chr22:34252728-34252790	63	chr22:34315983,34252728-34252790,34157545	C1	73	95	28.41	7.69	59.6	51.91	PanAS
UBOX5	HsaEX0068916	chr20:3095951-3096112	162	chr20:3102030,3095951-3096112,3090960	S	73	95	65.47	13.7	100	86.3	PanAS
XAF1	HsaEX0071704	chr17:6665205-6665356	152	chr17:6663920,6665205-6665356+6665360,6665474	S	65	95	48.2	3.03	82.95	79.92	PanAS
ZNF362	HsaEX0073512	chr1:33736088-33736213	126	chr1:33722255,33736088-33736213,33741701	C1	65	95	40.97	2.34	93.52	91.18	PanAS
LGALS9B	HsaEX0035681	chr17:20358616-20358711	96	chr17:20359874,20358616-20358711,20356920	C1	65	95	32.47	2.71	92.74	90.03	PanAS
GPR56	HsaEX0028401	chr16:57675503-57675620	118	chr16:57662714+57662740,57675499+57675503-57675620,57684165	S	65	95	69.28	19.65	97.27	77.62	PanAS
SOLH	HsaEX0060953	chr16:586029-586142	114	chr16:583998,586029-586142,596817	C2	65	95	34.16	2.22	72.27	70.05	PanAS
C17orf63	HsaEX0009795	chr17:27161311-27161344	34	chr17:27169700,27161311-27161344,27093725	C1	65	95	29.96	2.44	100	97.56	PanAS
DCUN1D3	HsaEX0018787	chr16:20907630-20907703	74	chr16:20911526+20911599+20911629,20907630-20907703,20873965	S	64	95	25.07	6.18	42.03	35.85	PanAS
CCDC91	HsaEX0013539	chr12:28408514-28408595	82	chr12:28379132,28408514-28408595,28410135	C2	64	95	60.15	16.67	98.31	81.64	PanAS
TBX3	HsaEX0064086	chr12:115117718-115117777	60	chr12:115118684,115117718-115117777,115117456	S	64	95	26.65	0	72.92	72.92	PanAS
AUTS2	HsaEX0007361	chr7:70239014-70239085	72	chr7:70236630,70239014-70239085,70242089	C3	63	95	67.61	11.32	100	88.68	PanAS
SYNGAP1	HsaEX0063196	chr6:33416566-33416645	80	chr6:33415710,33416566-33416645+33416872,33419537	S	63	95	62.63	12.24	100	87.76	PanAS
RP4-717I23.3	HsaEX0055296	chr1:93775272-93775347	76	chr1:93777047+93777051,93775272-93775347,93771027	C3	63	95	25.24	0	54.99	54.99	PanAS
POSTN	HsaEX0049206	chr13:38143437-38143520	84	chr13:38143881,38143437-38143520,38138697	S	62	95	35.46	6.1	97.99	91.89	PanAS
MAP3K8	HsaEX0037608	chr10:30726105-30726335	231	chr10:30723307+30723677,30726105-30726335,30727845	S	62	95	60.51	16.92	100	83.08	PanAS
ZNF618	HsaEX0074060	chr9:116778393-116778452	60	chr9:116770834,116778393-116778452,116778975	S	62	95	30.68	3.03	60.43	57.4	PanAS
APOL3	HsaEX0005177	chr22:36545094-36545190	97	chr22:36556717,36545094-36545190,36541647	C1	62	95	76.3	51.05	100	48.95	PanAS
ZSWIM7	HsaEX0074616	chr17:15880893-15881014	122	chr17:15881277+15881358,15880893-15881014,15880406	C1	61	95	51.95	12.68	100	87.32	PanAS
ARHGEF9	HsaEX0005739	chrX:62974195-62974556	362	chrX:62974801,62974184+62974195-62974556,62944591	C2	61	95	46.15	3.82	88.86	85.04	PanAS
ZNF256	HsaEX0073268	chr19:58455302-58455428	127	chr19:58458810,58455302-58455428,58454015	S	60	95	72.39	37.5	96.12	58.62	PanAS
LRP8	HsaEX0036477	chr1:53742364-53742750	387	chr1:53746259,53742364-53742750,53741425	C1	60	95	42.15	2.7	91.56	88.86	PanAS
C6orf182	HsaEX0011312	chr6:109427238-109427293	56	chr6:109416454+109416778,109427238-109427293,109461624+109461628	C2	60	95	23	6.17	54.03	47.86	PanAS
LST1	HsaEX0036877	chr6:31555418-31555510	93	chr6:31555095,31555418-31555510,31556274+31556295+31556340	C2	60	95	35.01	7.07	63.6	56.53	PanAS
C2orf84	HsaEX0010792	chr2:24347200-24347330	131	chr2:24346403,24347200-24347330,24357989	C2	60	95	33.96	4.27	77.97	73.7	PanAS
AGBL5	HsaEX0003063	chr2:27291916-27291962	47	chr2:27291612,27291916-27291962,27292441	C1	59	95	45.78	0	100	100	PanAS
NKTR	HsaEX0043065	chr3:42668692-42668719	28	chr3:42663008,42668692-42668719,42672038	S	59	95	49.28	0	95.81	95.81	PanAS
ROBO3	HsaEX0054213	chr11:124747833-124748027	195	chr11:124747554+124747648,124747833-124748027,124748194	C1	59	95	58.68	12.74	100	87.26	PanAS
AKT1S1	HsaEX0003484	chr19:50379860-50380055	196	chr19:50380282+50380494,50379766+50379860-50380055,50376559	S	59	95	45.97	2.79	81.58	78.79	PanAS
PVT1	HsaEX0051350	chr8:129022564-129022690	127	chr8:129021964,129022564-129022690,129082406	C2	59	95	53.02	4.81	97.27	92.46	PanAS
TMEM149	HsaEX0065509	chr19:36230611-36230989	379	chr19:36231281,36230611-36230989,36230527	C1	59	95	73.69	54.5	100	45.5	PanAS
TACC2	HsaEX0063370	chr10:123903087-123903221	135	chr10:123892249,123903087-123903221,123954555	C1	59	95	30.48	3.12	69.37	66.25	PanAS
KIAA1841	HsaEX0034302	chr2:61384997-61385147	151	chr2:61372331,61361272+61384997-61385147,61386453	C2	59	95	54.64	11.02	100	88.98	PanAS
ZNF691	HsaEX0074201	chr1:43315236-43315413	178	chr1:43312328,43315236-43315413,43316621	C2	59	95	36.01	2.86	85	82.14	PanAS
SNX19	HsaEX0060829	chr11:130784589-130784644	56	chr11:130786175,130784161+130784589-130784644,130781666	S	57	95	69.13	45.16	91.97	46.81	PanAS
NOD1	HsaEX0043249	chr7:30477189-30477272	84	chr7:30485757,30477189-30477272,30475697	C1	57	95	69.34	27.77	96.15	68.38	PanAS
C8orf38	HsaEX0011532	chr8:95987546-95987643	98	chr8:95970407,95987546-95987643,95993083+95993087	C2	57	95	40.85	0	86.46	86.46	PanAS
ADAMTS10	HsaEX0002408	chr19:8670508-8670694	187	chr19:8675529,8670508-8670694,8670243	C1	56	95	71.66	21.95	100	78.05	PanAS
RBMS3	HsaEX0052794	chr3:29941196-29941246	51	chr3:29938966,29941196-29941246,29977577	S	56	95	73.65	43.72	94.55	50.83	PanAS
C14orf138	HsaEX0009387	chr14:50579333-50579437	105	chr14:50581003,50579333-50579437,50576431	S	56	95	72.46	44.71	96.06	51.35	PanAS
TMCO4	HsaEX0065305	chr1:20124630-20124708	79	chr1:20126348,20124630-20124708,20113610	C2	56	95	41.17	7.79	95.1	87.31	PanAS
SLC16A4	HsaEX0058722	chr1:110925456-110925527	72	chr1:110931859,110925456-110925527+110925588,110924417	C1	55	95	65.4	0	100	100	PanAS
TTTY15	HsaEX0068265	chrY:14802255-14802370	116	chrY:14798535,14802255-14802370,14813939	C1	55	95	21.47	0	50.89	50.89	PanAS
RP4-639F20.1	HsaEX0055274	chr1:95426873-95426989	117	chr1:95397541,95426873-95426989,95428481+95428535+95428550	S	55	95	76.63	0	96.61	96.61	PanAS
ZNF691	HsaEX0074200	chr1:43314962-43315084	123	chr1:43312328,43314962-43315084,43315236	C3	55	95	43.66	5.56	100	94.44	PanAS
PLCB4	HsaEX0048085	chr20:9385960-9385995	36	chr20:9382237,9385960-9385995,9388564	S	44	95	43.93	6.95	100	93.05	PanAS
COL8A1	HsaEX0016676	chr3:99394504-99394565	62	chr3:99357508,99394504-99394565,99463741	C3	44	95	23.77	6.49	50.72	44.23	PanAS
C6orf168	HsaEX0011283	chr6:99771320-99771543	224	chr6:99781227,99771320-99771543,99739696	C1	44	95	56.99	7.41	100	92.59	PanAS
MAP3K6	HsaEX0037585	chr1:27691152-27691175	24	chr1:27691264,27691152-27691175,27690885	S	44	95	69.45	35.89	90.32	54.43	PanAS
PIGL	HsaEX0047421	chr17:16245887-16246034	148	chr17:16230219,16245887-16246034,16250859+16250864	S	43	95	74.98	41.3	96.23	54.93	PanAS
ATP7B	HsaEX0007043	chr13:52532447-52532536	90	chr13:52534284,52532447-52532536+52532680,52531743	C1	43	95	74.79	53.85	93.74	39.89	PanAS
ZNF418	HsaEX0073619	chr19:58434560-58434657	98	chr19:58436991,58434560-58434657,58433997	S	43	95	65.86	26.39	93.26	66.87	PanAS
BAHCC1	HsaEX0007549	chr17:79413764-79413856	93	chr17:79412707,79413764-79413856,79414062	S	42	95	53.06	16.79	96.08	79.29	PanAS
C7orf63	HsaEX0011495	chr7:89936215-89936412	198	chr7:89934134,89936215-89936412,89937082	C1	42	95	65.51	37.5	91.67	54.17	PanAS
CLEC7A	HsaEX0015639	chr12:10275844-10275962	119	chr12:10277896,10275844-10275962,10271189	C1	42	95	75.76	45.66	92.59	46.93	PanAS
FZD3	HsaEX0026690	chr8:28357450-28357495	46	chr8:28351860,28357450-28357495,28360187	S	42	95	39.93	0	100	100	PanAS
C22orf40	HsaEX0010623	chr22:46644069-46644181	113	chr22:46646153,46644069-46644181,46643118	C1	42	95	58.74	9.78	94.25	84.47	PanAS
PTK2B	HsaEX0050877	chr8:27180784-27180943	160	chr8:27180016,27180784-27180943,27183081	S	41	95	52.18	0	100	100	PanAS
ANKAR	HsaEX0004165	chr2:190569749-190569950	202	chr2:190561095,190569749-190569950,190571664	C1	41	95	54.45	4.17	93.68	89.51	PanAS
C12orf48	HsaEX0009194	chr12:102569261-102569444	184	chr12:102559661,102569261-102569444,102576327	C2	41	95	64.94	24.24	100	75.76	PanAS
C12orf48	HsaEX0009195	chr12:102572370-102572548	179	chr12:102569444,102572370-102572548,102576327	C2	41	95	60.96	23.36	100	76.64	PanAS
FANCA	HsaEX0024726	chr16:89865359-89865487	129	chr16:89865574+89865580,89865359-89865487,89862426	C1	41	95	27.87	6.83	72.12	65.29	PanAS
CLEC7A	HsaEX0015642	chr12:10279170-10279307	138	chr12:10280346,10279170-10279307,10278047	S	40	95	31.25	2.48	82.09	79.61	PanAS
FKTN	HsaEX0025869	chr9:108335936-108336027	92	chr9:108320446,108335936-108336027,108337226	C2	40	95	60.52	30.37	96.1	65.73	PanAS
ANKMY1	HsaEX0004244	chr2:241451278-241451418	141	chr2:241452219,241451278-241451418,241448872	C3	40	95	36.52	0	76.27	76.27	PanAS
TIGD6	HsaEX0064972	chr5:149379491-149379879	389	chr5:149380037,149379491-149379879,149375992	S	39	95	28.89	2.94	57.45	54.51	PanAS
CCDC7	HsaEX0013419	chr10:32759992-32760158	167	chr10:32751977,32759992-32760158,32761409	C1	39	95	42.11	14.17	97.02	82.85	PanAS
SLFN11	HsaEX0060134	chr17:33694622-33694719	98	chr17:33700493,33694622-33694719,33694082	C1	39	95	65.45	0	93.23	93.23	PanAS
SCUBE2	HsaEX0056671	chr11:9074646-9074759	114	chr11:9075184,9074646-9074759+9074762,9069109	C3	38	95	53.31	7	95.13	88.13	PanAS
NTRK3	HsaEX0044092	chr15:88524457-88524591	135	chr15:88576088,88524457-88524591,88522694	C1	38	95	67.51	19.05	94.59	75.54	PanAS
ANKMY1	HsaEX0004245	chr2:241446977-241447108	132	chr2:241452219,241446977-241447108,241439982	C2	38	95	70.84	30.25	95.54	65.29	PanAS
ZNF131	HsaEX0073019	chr5:43080002-43080056	55	chr5:43068319,43080002-43080056,43099122	C1	38	95	34.7	6.82	64.05	57.23	PanAS
ZNF202	HsaEX0073172	chr11:123610830-123610897	68	chr11:123612257,123610825+123610830-123610897+123610900+123610940,123601625+123601693	C2	37	95	53.91	2.55	93.22	90.67	PanAS
NLGN3	HsaEX0043079	chrX:70373327-70373386	60	chrX:70368056,70373327-70373386,70375064	C1	37	95	68.85	8.11	92.5	84.39	PanAS
EP400NL	HsaEX0022604	chr12:132594313-132594377	65	chr12:132593227,132594313-132594377,132599003	C1	37	95	65.58	32.58	96.43	63.85	PanAS
BZRAP1	HsaEX0008752	chr17:56402895-56403074	180	chr17:56403654,56402895-56403074,56402363	S	22	95	67.79	45.65	96.3	50.65	PanAS
ALOX15B	HsaEX0003786	chr17:7949986-7950072	87	chr17:7949004,7949986-7950072,7950225	S	22	95	77.86	41.18	96.04	54.86	PanAS
PLCXD1	HsaEX0048146	chrX:198149-198351	203	chrX:193061,198149-198351,200834	S	22	95	56.06	26.11	92.31	66.2	PanAS
P2RY10	HsaEX0045106	chrX:78203312-78203360	49	chrX:78200992,78203312-78203360,78216005	C1	22	95	24.66	0	58.72	58.72	PanAS
VASH2	HsaEX0070238	chr1:213139064-213139120	57	chr1:213134596+213134702,213139064-213139120,213139613	C1	22	95	70.32	27.63	91.01	63.38	PanAS
KIAA175	HsaEX0034275	chr20:36854067-36854183	117	chr20:36855556,36854067-36854183,36852038	C1	22	95	71.78	48.44	90.5	42.06	PanAS
ADAMTSL1	HsaEX0002588	chr9:18675855-18675905	51	chr9:18662071,18675855-18675905,18680310	S	22	95	75.15	58.7	90.7	32	PanAS
RP11-250B2.3	HsaEX0054557	chr6:81163827-81163944	118	chr6:81162978,81163827-81163944,81172589	S	22	95	50.73	0.23	88.24	88.01	PanAS
HIVEP2	HsaEX0030055	chr6:143222801-143222874	74	chr6:143266628,143222801-143222874,143158184	C1	22	95	24	7.69	80.17	72.48	PanAS
LHFPL4	HsaEX0035734	chr3:9545450-9545542	93	chr3:9547651,9545450-9545542,9543995	S	22	95	32.28	4.11	61.7	57.59	PanAS
ELMOD1	HsaEX0022169	chr11:107521611-107521634	24	chr11:107521129,107521611-107521634,107524898	S	21	95	45.91	6.43	83.46	77.03	PanAS
SMTNL2	HsaEX0060539	chr17:4496224-4496466	243	chr17:4495743,4496224-4496466,4497117	S	21	95	64.03	23.81	90.48	66.67	PanAS
P2RY10	HsaEX0045107	chrX:78207690-78207832	143	chrX:78200992,78207690-78207832,78216005	C1	21	95	37.67	0	56.52	56.52	PanAS
ILDR1	HsaEX0031542	chr3:121713029-121713160	132	chr3:121720155,121713029-121713160,121712798+121712817	S	21	95	75.53	57.65	91.93	34.28	PanAS
IRAK1BP1	HsaEX0032187	chr6:79607781-79608015	235	chr6:79607676,79607781-79608015,79612336+79612709	C1	21	95	57.01	11.11	100	88.89	PanAS
C11orf66	HsaEX0009042	chr11:61253816-61253875	60	chr11:61253383,61253816-61253875,61254420	C3	21	95	63.59	23.08	94.35	71.27	PanAS
ZNF519	HsaEX0073849	chr18:14080188-14080265	78	chr18:14084876,14080188-14080265,14078297	S	21	95	46.4	0	84	84	PanAS
PRSS36	HsaEX0050484	chr16:31152000-31152078	79	chr16:31153044,31151813+31152000-31152078,31150737	C3	21	95	56.74	11.11	90.91	79.8	PanAS
C19orf54	HsaEX0010005	chr19:41247978-41248094	117	chr19:41248304+41248420+41248482,41247978-41248094,41247344	C3	21	95	38.91	4.76	67.21	62.45	PanAS
ZDHHC11	HsaEX0072435	chr5:823504-823924	421	chr5:825279,823504-823924+824208,822010	C2	21	95	67.9	21.24	91.76	70.52	PanAS
RP5-864K19.4	HsaEX0055372	chr1:39341613-39341690	78	chr1:39325911,39341613-39341690,39379212	C1	21	95	35.28	7.32	83.16	75.84	PanAS
RP11-369J21.5	HsaEX0054693	chr10:81816075-81816161	87	chr10:81820546+81820572+81820575,81816075-81816161,81813342	C2	21	95	24.5	8.57	55.95	47.38	PanAS
IQCD	HsaEX0032090	chr12:113638385-113638618	234	chr12:113645243,113638385-113638618,113635417	C2	21	95	67.72	37.25	98.15	60.9	PanAS
LRRC16B	HsaEX0036528	chr14:24534831-24534959	129	chr14:24534482,24534831-24534959,24535607	S	20	95	73.96	41.44	91.43	49.99	PanAS
PON3	HsaEX0049181	chr7:95006845-95006988	144	chr7:95019466,95006845-95006988,95001650	S	20	95	29.27	1.49	53.33	51.84	PanAS
C1orf109	HsaEX0010097	chr1:38157131-38157253	123	chr1:38157702,38157131-38157253,38156110	C2	20	95	30.01	0	62.79	62.79	PanAS
MGAT1	HsaEX0039079	chr5:180235648-180235810	163	chr5:180242414+180242425+180242523,180235648-180235810,180220097	C1	20	95	69.52	39.98	92.07	52.09	PanAS
EGF	HsaEX0021804	chr4:110929308-110929386	79	chr4:110925778,110929308-110929386+110929410,110932358	C1	20	95	51.08	13.04	100	86.96	PanAS
VSIG4	HsaEX0070724	chrX:65242165-65242251	87	chrX:65242683,65242165-65242251+65242342,65241965+65241975+65242008	S	20	95	69.82	35.69	90.24	54.55	PanAS
IKZF3	HsaEX0031273	chr17:37934138-37934263	126	chr17:37944511,37934138-37934263,37934016+37934020	S	20	95	39.17	0.57	77.12	76.55	PanAS
RNF149	HsaEX0053924	chr2:101890493-101890702	210	chr2:101898321,101890493-101890702,101889803	C1	20	95	50.06	9.52	80.25	70.73	PanAS
SIGLEC7	HsaEX0058295	chr19:51647851-51647941	91	chr19:51646059,51647663+51647851-51647941,51648146+51648169	C1	20	95	81.95	55.56	93.55	37.99	PanAS
ZBTB44	HsaEX0072174	chr11:130131151-130131824	674	chr11:130184270,130131151-130131824,130109791	S	20	95	77.72	61.11	93.85	32.74	PanAS
RP11-30E17.3	HsaEX0054615	chr13:79986817-79987042	226	chr13:79980437+79980612,79986817-79987042,79991970	C2	20	95	54.64	8.57	84.62	76.05	PanAS
CTD-2269F5.1	HsaEX0017757	chr5:83681706-83681873	168	chr5:83680417+83680696,83681706-83681873,83683640	C1	20	95	26.6	2.86	51.38	48.52	PanAS
FOLR1	HsaEX0026201	chr11:71901620-71901685	66	chr11:71900803,71901620-71901685,71903210	S	20	95	49.5	28.38	94.8	66.42	PanAS
CASKIN1	HsaEX0012549	chr16:2233647-2233748	102	chr16:2233832,2233647-2233748,2231930	C2	20	95	60.2	22.4	93.02	70.62	PanAS
ASPHD1	HsaEX0006342	chr16:29917400-29917448	49	chr16:29917280,29917400-29917448,29930852	C2	20	95	29.67	9.37	72.52	63.15	PanAS
TMEM139	HsaEX0065480	chr7:142982441-142982538	98	chr7:142982091,142982441-142982538,142983034	C3	20	95	72.98	43.21	90.21	47	PanAS
ERLEC1	HsaEX0023087	chr2:54035436-54035597	162	chr2:54028979,54035436-54035597,54036351	S	108	94	79.02	48.95	93.48	44.53	PanAS
BRD2	HsaEX0008410	chr6:32942798-32942889	92	chr6:32942542,32942798-32942889,32943161	S	108	94	22.53	5.74	44.1	38.36	PanAS
MFF	HsaEX0038967	chr2:228217230-228217289	60	chr2:228212100,228217230-228217289,228220393	C2	108	94	49.14	7.96	100	92.04	PanAS
C6orf48	HsaEX0011350	chr6:31804201-31804294	94	chr6:31803228,31804072+31804076+31804201-31804294,31805013	S	108	94	21.65	6.84	50.56	43.72	PanAS
CD46	HsaEX0013872	chr1:207941124-207941168	45	chr1:207940540,207941124-207941168,207943666	S	107	94	60.41	10.18	94.07	83.89	PanAS
SFRS18	HsaEX0057670	chr6:99864225-99864304	80	chr6:99873091,99864225-99864304,99862562+99862566	S	106	94	76.36	47.66	96.39	48.73	PanAS
SMN1	HsaEX0060480	chr5:70247768-70247821	54	chr5:70242003,70247768-70247821,70248266	S	106	94	70.58	38.46	100	61.54	PanAS
STYXL1	HsaEX0062814	chr7:75643060-75643205	146	chr7:75651169,75643060-75643205,75634722	S	104	94	78.7	55.56	95	39.44	PanAS
SGSM3	HsaEX0057887	chr22:40797597-40797679	83	chr22:40796817,40797597-40797679,40798143	S	103	94	75.63	20	100	80	PanAS
DPH3	HsaEX0020804	chr3:16305662-16305736	75	chr3:16306102+16306276,16305662-16305736,16302336	S	102	94	63.75	33.22	92.07	58.85	PanAS
PRMT2	HsaEX0050273	chr21:48056356-48056459	104	chr21:48055675,48056351+48056356-48056459,48056805+48056808	S	102	94	39.81	5.57	84.77	79.2	PanAS
ACLY	HsaEX0001940	chr17:40052873-40052902	30	chr17:40054002,40052873-40052902,40049427	S	102	94	69.02	42.52	95.57	53.05	PanAS
UBAP2	HsaEX0068678	chr9:33956077-33956144	68	chr9:33960824,33956077-33956144,33953472	C1	102	94	77.08	35.02	95.93	60.91	PanAS
SETD2	HsaEX0057454	chr3:47122406-47122573	168	chr3:47125210,47122291+47122406-47122573,47108608	S	102	94	20.63	3.55	56.8	53.25	PanAS
PLDN	HsaEX0048195	chr15:45884333-45884474	142	chr15:45879723,45884333-45884474,45895298	C1	102	94	72.7	37.19	100	62.81	PanAS
ATP5SL	HsaEX0006942	chr19:41939177-41939339	163	chr19:41939442,41939177-41939339,41938313	S	101	94	66.04	15.05	97.7	82.65	PanAS
ZDHHC4	HsaEX0072534	chr7:6617221-6617351	131	chr7:6617129,6617221-6617351,6618132+6618197	S	101	94	27.78	3.45	75.94	72.49	PanAS
GGCT	HsaEX0027388	chr7:30540152-30540297	146	chr7:30544185+30544191,30540152-30540297,30538554	S	101	94	72.44	46.34	95.11	48.77	PanAS
CREM	HsaEX0017223	chr10:35437296-35437419	124	chr10:35416093+35416121+35416495,35437296-35437419,35467800+35467817	C1	101	94	71.92	41.22	100	58.78	PanAS
VEGFA	HsaEX0070300	chr6:43749693-43749789	97	chr6:43746655,43749693-43749789+43749824,43752278+43752344	C1	101	94	64.94	19.36	100	80.64	PanAS
PBRM1	HsaEX0045732	chr3:52592265-52592429	165	chr3:52595783,52592265-52592429,52584833	C2	101	94	26.52	4.39	61.88	57.49	PanAS
ZMYND8	HsaEX0072977	chr20:45841287-45841370	84	chr20:45848909,45841287-45841370,45839542	S	99	94	51.19	5.88	91.74	85.86	PanAS
GIGYF2	HsaEX0027462	chr2:233599127-233599196	70	chr2:233568199,233599127-233599196,233599865	C2	99	94	20.68	0	42.17	42.17	PanAS
TRIM26	HsaEX0067074	chr6:30172433-30172542	110	chr6:30181082,30172433-30172542,30168860+30168900+30168915	C1	99	94	61.04	7.81	94.84	87.03	PanAS
PRPF39	HsaEX0050364	chr14:45579097-45579196	100	chr14:45578983,45579097-45579196,45579274+45579297	S	98	94	33.43	2.7	100	97.3	PanAS
ALKBH2	HsaEX0003740	chr12:109527852-109528012	161	chr12:109530312,109527814+109527852-109528012,109526317	S	98	94	77.53	48.02	100	51.98	PanAS
ROD1	HsaEX0054254	chr9:115038124-115038293	170	chr9:115060112+115060121,115038124-115038293,115030475	S	98	94	73.07	45.95	94.44	48.49	PanAS
MBD1	HsaEX0038071	chr18:47800556-47800720	165	chr18:47801347,47800556-47800720+47800723,47800230+47800233	S	98	94	72.64	27.27	93.46	66.19	PanAS
CEP63	HsaEX0014821	chr3:134266177-134266314	138	chr3:134265130,134266177-134266314,134267904	S	98	94	21.64	0	43.26	43.26	PanAS
NUBP2	HsaEX0044120	chr16:1836758-1836956	199	chr16:1836656,1836739+1836758-1836956,1837678	S	97	94	67.65	31.83	94.83	63	PanAS
ERI3	HsaEX0023070	chr1:44818532-44818597	66	chr1:44820510+44820564+44820932,44818522+44818532-44818597,44785416	C3	97	94	74.24	30.23	94.5	64.27	PanAS
ATXN2	HsaEX0007263	chr12:111891481-111891649	169	chr12:111893833,111891481-111891649,111890644	S	97	94	73.95	44.32	97.77	53.45	PanAS
IQSEC1	HsaEX0032160	chr3:12944273-12944322	50	chr3:12949849,12944273-12944322,12943022	S	97	94	45.03	5.59	94.42	88.83	PanAS
TBC1D7	HsaEX0063924	chr6:13325326-13325406	81	chr6:13327019,13325326-13325406,13321327	S	96	94	75.39	20.13	100	79.87	PanAS
ANKRD12	HsaEX0004293	chr18:9204474-9204542	69	chr18:9195696,9204474-9204542,9208655	S	96	94	50.16	13.08	95.87	82.79	PanAS
RNF146	HsaEX0053917	chr6:127607195-127607322	128	chr6:127601485,127607195-127607322,127607761	C1	96	94	63.59	13.67	94.91	81.24	PanAS
ARID1B	HsaEX0005757	chr6:157495981-157496139	159	chr6:157495251,157495981-157496139,157502103	S	95	94	56.02	11.37	100	88.63	PanAS
HUWE1	HsaEX0030734	chrX:53652747-53652983	237	chrX:53654361,53652747-53652983+53652989,53652219	S	95	94	41.93	3.99	78.65	74.66	PanAS
CTBS	HsaEX0017678	chr1:85035614-85035822	209	chr1:85036265,85035614-85035822,85031695	S	95	94	65.43	19.35	97.1	77.75	PanAS
PPP3CC	HsaEX0049748	chr8:22396982-22397011	30	chr8:22390531,22396982-22397011,22398128	S	95	94	47.11	7.57	99.74	92.17	PanAS
SYNRG	HsaEX0063237	chr17:35939228-35939530	303	chr17:35944756,35939228-35939530,35937711	C1	94	94	44.3	0	89.9	89.9	PanAS
HSCB	HsaEX0030514	chr22:29141852-29141996	145	chr22:29140692+29140697,29141852-29141996,29147229	C1	94	94	72.99	28.04	100	71.96	PanAS
RASA4B	HsaEX0052381	chr7:102143610-102143691	82	chr7:102150046,102143610-102143691,102141674	C2	94	94	73.53	21.93	99.65	77.72	PanAS
HERC2P3	HsaEX0029758	chr15:20682178-20682309	132	chr15:20688656,20682178-20682309,20671623	C1	94	94	20.35	1.83	75.62	73.79	PanAS
DYRK4	HsaEX0021353	chr12:4716493-4716553	61	chr12:4714252,4716493-4716553,4719321	S	93	94	60.22	25.42	100	74.58	PanAS
GAB1	HsaEX0026734	chr4:144378833-144378922	90	chr4:144361535,144378833-144378922,144380538	S	93	94	30.93	5.01	85.56	80.55	PanAS
KDM6A	HsaEX0033358	chrX:44921892-44921993	102	chrX:44920664,44921892-44921993,44922667	S	93	94	65.71	36.45	100	63.55	PanAS
DEDD2	HsaEX0019064	chr19:42720832-42721197	366	chr19:42721760+42721784,42720832-42721197,42719404	S	93	94	62.42	6.98	100	93.02	PanAS
DENND4A	HsaEX0019175	chr15:65992882-65993010	129	chr15:65993389,65992882-65993010+65993013,65989721	S	90	94	28.18	6.42	85	78.58	PanAS
NAB1	HsaEX0041541	chr2:191520703-191520879	177	chr2:191514708,191520703-191520879,191523884	C3	90	94	31.15	1.94	79.87	77.93	PanAS
TMEM175	HsaEX0065590	chr4:941497-941680	184	chr4:926328,941497-941680,944209+944212	C2	89	94	69.84	32.82	96.86	64.04	PanAS
UNK	HsaEX0069421	chr17:73789524-73789612	89	chr17:73781065,73789524-73789612+73789617,73805841	C3	89	94	43.65	0	94.88	94.88	PanAS
TMEM62	HsaEX0065900	chr15:43430772-43430817	46	chr15:43427847,43430772-43430817,43440953	C2	88	94	56.86	1.39	95.83	94.44	PanAS
ITSN1	HsaEX0032619	chr21:35199122-35199167	46	chr21:35191627,35199122-35199167,35201928	C2	88	94	75.39	28.34	96.61	68.27	PanAS
ZEB1	HsaEX0072568	chr10:31676053-31676195	143	chr10:31662102,31676053-31676195,31749966	C3	87	94	31.12	5.09	83.45	78.36	PanAS
XPNPEP3	HsaEX0071774	chr22:41257622-41257839	218	chr22:41253249+41253667,41257622-41257839,41265003	C2	87	94	27.89	2.22	73.06	70.84	PanAS
RP11-706O15.1	HsaEX0055129	chrX:3736483-3736541	59	chrX:3736698,3736483-3736541,3735819	C3	87	94	48.01	5.93	100	94.07	PanAS
HDAC10	HsaEX0029368	chr22:50686121-50686205	85	chr22:50686319,50686121-50686205,50685395	S	86	94	69.42	30.42	100	69.58	PanAS
RIPK2	HsaEX0053748	chr8:90775057-90775210	154	chr8:90770461,90775057-90775210,90777569	S	86	94	61.43	8.57	93.83	85.26	PanAS
EIF2C3	HsaEX0021974	chr1:36448222-36448313	92	chr1:36439112,36448222-36448313,36469942	C2	86	94	29.35	1.75	92.11	90.36	PanAS
SSH1	HsaEX0061847	chr12:109196098-109196144	47	chr12:109198832,109196098-109196144,109194702	S	85	94	68.12	20.75	97.01	76.26	PanAS
XPO4	HsaEX0071797	chr13:21437108-21437262	155	chr13:21442735,21437108-21437262+21437278,21436997	S	85	94	27.41	7.11	100	92.89	PanAS
KLHDC10	HsaEX0034727	chr7:129736761-129736847	87	chr7:129710649,129736761-129736847,129756285	S	84	94	32.24	4.97	61.86	56.89	PanAS
ZNF7	HsaEX0074219	chr8:146054908-146054989	82	chr8:146052994+146053197+146053267,146054812+146054830+146054863+146054866+146054908-146054989,146062732+146062776+146062779	C2	84	94	68.18	17.5	94.6	77.1	PanAS
SETMAR	HsaEX0057538	chr3:4354582-4354913	332	chr3:4345210+4345552,4354582-4354913+4355037,4357896	C2	84	94	27.67	7.69	54.39	46.7	PanAS
SLC38A9	HsaEX0059595	chr5:55000150-55000262	113	chr5:55007180+55007280,55000150-55000262,54993820	C1	84	94	37.17	6.15	96.75	90.6	PanAS
EFCAB2	HsaEX0021665	chr1:245165423-245165534	112	chr1:245133745,245165423-245165534+245165614,245180544	C2	84	94	28.54	0	94.37	94.37	PanAS
WHAMM	HsaEX0071476	chr15:83490463-83490591	129	chr15:83488240,83490463-83490591,83491852	S	83	94	55.96	15.9	100	84.1	PanAS
GK5	HsaEX0027526	chr3:141905036-141905109	74	chr3:141905294,141905036-141905109,141904831	S	83	94	73.77	40.59	100	59.41	PanAS
KIF21A	HsaEX0034511	chr12:39711875-39712003	129	chr12:39713708,39711875-39712003,39705355	C1	83	94	45.91	6.17	100	93.83	PanAS
NFIB	HsaEX0042735	chr9:14112998-14113080	83	chr9:14120439,14112998-14113080,14088325	C2	83	94	23.76	5.24	59.23	53.99	PanAS
RNF135	HsaEX0053895	chr17:29315004-29315124	121	chr17:29311778,29314962+29315004-29315124,29324260	S	83	94	74.92	49.19	100	50.81	PanAS
AC006116.3	HsaEX0000886	chr19:56886055-56886126	72	chr19:56884992,56886055-56886126,56888236	S	83	94	27.59	0	68.54	68.54	PanAS
RNMT	HsaEX0054185	chr18:13730626-13730754	129	chr18:13726728,13730626-13730754,13731475	S	82	94	66.2	27.27	100	72.73	PanAS
ZKSCAN5	HsaEX0072836	chr7:99117450-99117532	83	chr7:99110214,99117450-99117532,99123436	C2	82	94	71.39	17.65	100	82.35	PanAS
KIAA0141	HsaEX0033456	chr5:141318421-141318469	49	chr5:141318325,141318417+141318421-141318469,141319071+141319075+141319119	S	81	94	29.22	4.21	73.5	69.29	PanAS
NFRKB	HsaEX0042792	chr11:129764254-129764333	80	chr11:129765391,129764254-129764333,129762765+129762783	C1	80	94	59.93	9.18	100	90.82	PanAS
POLR2J4	HsaEX0049074	chr7:44009331-44009453	123	chr7:44012229,44009331-44009453+44009460,44005994	S	79	94	70.49	12.82	97.42	84.6	PanAS
ST7L	HsaEX0062073	chr1:113093223-113093315	93	chr1:113098490,113093223-113093315,113084712	C1	79	94	75.92	52	100	48	PanAS
TTC13	HsaEX0067762	chr1:231079552-231079644	93	chr1:231090079,231079552-231079644,231076302	C3	79	94	65.82	29.28	100	70.72	PanAS
ZNF138	HsaEX0073045	chr7:64275954-64276031	78	chr7:64275422,64275950+64275954-64276031,64291829	C2	79	94	42.41	3.45	83.82	80.37	PanAS
CENPN	HsaEX0014627	chr16:81056202-81056303	102	chr16:81053881,81056202-81056303,81058320	C3	79	94	44.82	9.03	100	90.97	PanAS
AC107883.1	HsaEX0001548	chr15:77576225-77576372	148	chr15:77577300,77576225-77576372,77544868	C2	78	94	30.44	2.84	65.38	62.54	PanAS
APAF1	HsaEX0005018	chr12:99097149-99097277	129	chr12:99093347,99097149-99097277,99100263	S	77	94	66.32	13.28	100	86.72	PanAS
WDR27	HsaEX0071018	chr6:170089223-170089404	182	chr6:170101647,170089223-170089404,170089108	S	77	94	70.73	17.15	100	82.85	PanAS
C9orf126	HsaEX0011617	chr9:127828269-127828337	69	chr9:127904912,127828269-127828337,127818286	S	72	94	34.06	7.41	100	92.59	PanAS
	HsaEX0000053	chr12:70636846-70636984	139	chr12:70637092+70637126,70636846-70636984,70636673	S	72	94	31.05	0	75	75	PanAS
CTD-2526A2.1	HsaEX0017774	chr17:78395628-78395762	135	chr17:78389621,78395628-78395762,78395940+78396006	C1	72	94	26.81	3.06	89.56	86.5	PanAS
VPRBP	HsaEX0070403	chr3:51530750-51530796	47	chr3:51533889,51530750-51530796,51526504	C3	72	94	45.93	4.24	91.57	87.33	PanAS
ARAP1	HsaEX0005260	chr11:72443560-72443642	83	chr11:72463373,72443560-72443642,72438217	C1	72	94	71.58	36.59	100	63.41	PanAS
ASAP1	HsaEX0006159	chr8:131373916-131374017	102	chr8:131414131,131373916-131374017,131370389	S	71	94	31.47	2.22	61.13	58.91	PanAS
ZNF415	HsaEX0073616	chr19:53618463-53618560	98	chr19:53619566,53618463-53618560+53618585,53613161	C2	71	94	24.7	1.7	57.1	55.4	PanAS
TSNARE1	HsaEX0067595	chr8:143427104-143427253	150	chr8:143435998,143427104-143427253,143425833	C1	71	94	74.86	48.55	100	51.45	PanAS
ALG13	HsaEX0003678	chrX:110931115-110931276	162	chrX:110928331,110931115-110931276,110951255	C1	69	94	61.36	15.02	94.44	79.42	PanAS
ZNF326	HsaEX0073425	chr1:90473193-90473309	117	chr1:90470597+90470651,90473168+90473171+90473193-90473309,90475647	C1	69	94	60.02	13.18	97.93	84.75	PanAS
PARP3	HsaEX0045605	chr3:51976946-51977062	117	chr3:51976724,51976946-51977062,51977365+51977370	S	68	94	30.91	5.05	68.53	63.48	PanAS
EFS	HsaEX0021772	chr14:23829764-23830042	279	chr14:23834217,23829764-23830042,23829490	S	68	94	75.63	47.95	100	52.05	PanAS
DIAPH2	HsaEX0019685	chrX:96018099-96018119	21	chrX:96013257,96018099-96018119,96136578	S	68	94	68.53	3.26	98.03	94.77	PanAS
FER	HsaEX0025530	chr5:108103794-108103939	146	chr5:108084694,108103794-108103939,108133825	C2	68	94	64.61	27.32	100	72.68	PanAS
TBCEL	HsaEX0063997	chr11:120907214-120907321	108	chr11:120894863+120895000,120907214-120907321,120916383	C1	67	94	34.25	5.88	93.48	87.6	PanAS
C14orf106	HsaEX0009358	chr14:45719234-45719341	108	chr14:45722238,45719234-45719341,45716580	C1	67	94	22.3	0	38.32	38.32	PanAS
GMIP	HsaEX0027788	chr19:19746453-19746530	78	chr19:19747516,19746453-19746530,19746378	S	66	94	72.12	0	100	100	PanAS
PCSK5	HsaEX0046050	chr9:78749025-78749128	104	chr9:78722267,78749025-78749128,78771961	S	66	94	69.21	17.65	94.74	77.09	PanAS
PVRL3	HsaEX0051343	chr3:110852482-110853326	845	chr3:110845182,110852482-110853326,110863746	S	65	94	55.72	1.03	88.77	87.74	PanAS
LPP	HsaEX0036281	chr3:187943193-187943315	123	chr3:187871809,187943193-187943315,188123900	C2	65	94	74.67	49.23	100	50.77	PanAS
GABARAPL1	HsaEX0026746	chr12:10367268-10367378	111	chr12:10366786,10367268-10367378,10370662	C1	64	94	48.13	7.75	100	92.25	PanAS
XRRA1	HsaEX0071902	chr11:74656063-74656130	68	chr11:74659973,74656063-74656130,74648113	C1	64	94	69.71	44.27	100	55.73	PanAS
CREM	HsaEX0017221	chr10:35500182-35500317	136	chr10:35495979,35500182-35500317,35500584	S	64	94	55.39	2.88	90.29	87.41	PanAS
LCLAT1	HsaEX0035498	chr2:30682418-30682588	171	chr2:30670249+30670270+30670389,30682418-30682588,30748453	C1	63	94	24.66	0	66.42	66.42	PanAS
RCBTB2	HsaEX0052862	chr13:49098795-49098893	99	chr13:49107164,49098795-49098893,49096539	C2	63	94	58.67	22.28	100	77.72	PanAS
RBM16	HsaEX0052627	chr6:155181872-155182132	261	chr6:155154543,155181872-155182132,155228864	S	63	94	43.37	5.49	94.4	88.91	PanAS
MAN2A2	HsaEX0037389	chr15:91446461-91446964	504	chr15:91445756+91446205,91446461-91446964,91447420	S	62	94	57.35	17.74	100	82.26	PanAS
SLC25A23	HsaEX0059040	chr19:6441990-6442108	119	chr19:6444162,6441990-6442108+6442170,6438545	C1	62	94	69.85	8.2	92.29	84.09	PanAS
PVT1	HsaEX0051358	chr8:128951754-128951922	169	chr8:128903244,128951744+128951754-128951922,129001408	C1	62	94	75.38	21.16	100	78.84	PanAS
ANUBL1	HsaEX0004710	chr10:46120031-46120085	55	chr10:46121399,46120031-46120085,46113708	C1	62	94	62.59	12	96.49	84.49	PanAS
BCORL1	HsaEX0007940	chrX:129144484-129144639	156	chrX:129139293,129144484-129144639,129146554+129146557	S	54	94	27.15	3.51	56	52.49	PanAS
ZNF618	HsaEX0074057	chr9:116760539-116760634	96	chr9:116750860,116760539-116760634,116764276	S	54	94	24.45	0	54.39	54.39	PanAS
ZNF74	HsaEX0074284	chr22:20749623-20749708	86	chr22:20748952,20749560+20749623-20749708,20754922	C1	54	94	70.88	52.98	95.35	42.37	PanAS
ZNF418	HsaEX0073621	chr19:58445185-58445270	86	chr19:58446529+58446652+58446703,58445185-58445270,58441880+58441922+58441925	C1	54	94	52.35	0	90.7	90.7	PanAS
LPAR1	HsaEX0036175	chr9:113773828-113773970	143	chr9:113800932+113800960+113801150,113773828-113773970,113735838	C2	54	94	20.79	3.1	36.16	33.06	PanAS
ARNTL2	HsaEX0006022	chr12:27523062-27523163	102	chr12:27521345,27523062-27523163,27533180	C1	53	94	24.22	4.48	74.12	69.64	PanAS
C15orf17	HsaEX0009536	chr15:75192837-75192940	104	chr15:75194291,75192837-75192940+75192972,75192478	C1	53	94	36.3	0	82.67	82.67	PanAS
RHEB	HsaEX0053491	chr7:151195175-151195266	92	chr7:151216984,151195175-151195266,151188100	C2	53	94	43.54	6.88	96.3	89.42	PanAS
ZNF551	HsaEX0073917	chr19:58196630-58196753	124	chr19:58193612,58196630-58196753,58197849	S	53	94	62.76	17.76	95.18	77.42	PanAS
TRO	HsaEX0067335	chrX:54957174-54957464	291	chrX:54955143,54957174-54957464,54957637+54957658	S	52	94	75.27	46.75	92.79	46.04	PanAS
MKI67	HsaEX0039360	chr10:129913192-129914271	1080	chr10:129914755,129913192-129914271,129911866	S	52	94	66.02	25.05	100	74.95	PanAS
CDKL1	HsaEX0014372	chr14:50798980-50799150	171	chr14:50801283,50798980-50799150+50799410,50796899	S	52	94	65.86	41.03	96.77	55.74	PanAS
HKR1	HsaEX0030092	chr19:37815702-37815838	137	chr19:37815163+37815167,37815698+37815702-37815838,37838092+37838109+37838134	C1	52	94	49.49	7.58	98.45	90.87	PanAS
WDR27	HsaEX0071042	chr6:170013655-170013752	98	chr6:170033043,170013655-170013752,170002417	C1	52	94	43.58	8.49	93.1	84.61	PanAS
SP140L	HsaEX0061115	chr2:231193472-231193546	75	chr2:231192016,231193472-231193546,231222520	S	52	94	72.02	42.3	92.19	49.89	PanAS
AC068491.1	HsaEX0001273	chr2:112005725-112005818	94	chr2:112101638,112005725-112005818,111966238	C2	51	94	56.92	20.93	100	79.07	PanAS
ATG10	HsaEX0006539	chr5:81272015-81272146	132	chr5:81268125,81272012+81272015-81272146,81283378	S	51	94	25.45	0	66.49	66.49	PanAS
AC133485.1	HsaEX0001606	chr16:32193132-32193261	130	chr16:32193411,32193132-32193261,32190881	C1	51	94	71.95	34.39	98.66	64.27	PanAS
TRAPPC2L	HsaEX0066929	chr16:88925753-88925851	99	chr16:88925197,88925753-88925851,88926301	C2	50	94	52.23	5.56	95.92	90.36	PanAS
MFSD6	HsaEX0039032	chr2:191280018-191280139	122	chr2:191273229,191280018-191280139,191300703	S	50	94	39.03	0	66.99	66.99	PanAS
GKAP1	HsaEX0027533	chr9:86383733-86383885	153	chr9:86395297,86383733-86383885,86368274	S	50	94	62.83	41.94	100	58.06	PanAS
TNFAIP2	HsaEX0066157	chr14:103590216-103590288	73	chr14:103589820,103590216-103590288,103592647	C1	49	94	55.85	13.2	92.5	79.3	PanAS
IL1RAP	HsaEX0031421	chr3:190273919-190274005	87	chr3:190232008,190273919-190274005,190282078	S	49	94	52.16	5.88	97.4	91.52	PanAS
MFAP5	HsaEX0038960	chr12:8804258-8804287	30	chr12:8807033,8804258-8804287,8803185	S	49	94	72.91	0	93.01	93.01	PanAS
	HsaEX0000066	chr14:35441148-35441270	123	chr14:35451630+35451636,35441148-35441270+35441419,35438513	S	48	94	44.08	0	100	100	PanAS
CATSPER2	HsaEX0012655	chr15:43941925-43942077	153	chr15:43956616,43941925-43942077+43942098,43932694	C3	48	94	32.45	0	88.38	88.38	PanAS
KCNG1	HsaEX0032967	chr20:49628896-49628946	51	chr20:49639191+49639407,49628896-49628946+49628953,49626901	C1	47	94	60.68	2.98	93.45	90.47	PanAS
KIAA1211	HsaEX0033955	chr4:57164380-57164515	136	chr4:57138658,57164380-57164515,57173701	S	47	94	54.61	21.68	100	78.32	PanAS
DERL3	HsaEX0019305	chr22:24178487-24179149	663	chr22:24179251,24178487-24179149,24177119+24177166	S	36	94	45.16	2.44	81.47	79.03	PanAS
AC016725.4	HsaEX0001122	chr2:135635090-135635213	124	chr2:135676133,135635090-135635213,135626611	S	36	94	50.67	6.93	98.25	91.32	PanAS
ATG12	HsaEX0006546	chr5:115176515-115176631	117	chr5:115177087,115176515-115176631,115173461	C1	36	94	46.32	9.16	100	90.84	PanAS
TTC18	HsaEX0067804	chr10:75032686-75032775	90	chr10:75034191,75032686-75032775,75029473	C1	36	94	75.19	45	94.12	49.12	PanAS
DAG1	HsaEX0018455	chr3:49524687-49524848	162	chr3:49514333+49514338,49524661+49524687-49524848,49547852	C2	36	94	32.01	8.41	70.41	62	PanAS
ZNF438	HsaEX0073687	chr10:31273298-31273355	58	chr10:31320762+31320932+31321100,31273298-31273355,31230580	C2	36	94	64.54	26.23	93.65	67.42	PanAS
RAD54B	HsaEX0051932	chr8:95444839-95444884	46	chr8:95470496,95444839-95444884,95423543	C1	36	94	25.05	5.8	54.43	48.63	PanAS
DNAJC6	HsaEX0020358	chr1:65811294-65811406	113	chr1:65720332,65811294-65811406,65830318	C2	36	94	26.94	4.22	53.55	49.33	PanAS
RPGRIP1L	HsaEX0055470	chr16:53656131-53656268	138	chr16:53670351,53656131-53656268,53653120	S	35	94	27.25	7.99	49.4	41.41	PanAS
AC007639.1	HsaEX0000937	chr17:70427269-70427365	97	chr17:70588342,70427269-70427365,70424439	S	35	94	47.34	8.75	95.66	86.91	PanAS
PRDM5	HsaEX0049960	chr4:121737987-121738079	93	chr4:121739508,121737949+121737987-121738079,121737729+121737854	S	35	94	44.58	8.57	93.61	85.04	PanAS
ANKMY1	HsaEX0004251	chr2:241421600-241421678	79	chr2:241439375,241421600-241421678,241420514	S	35	94	56	5	100	95	PanAS
ADAMTS13	HsaEX0002434	chr9:136303366-136303486	121	chr9:136303017,136303366-136303486,136304487	C1	35	94	74.01	25.58	100	74.42	PanAS
ATF7IP2	HsaEX0006531	chr16:10481247-10481341	95	chr16:10481147,10481235+10481247-10481341+10481351,10522725	C1	35	94	60.04	11.48	97.73	86.25	PanAS
ZSCAN23	HsaEX0074572	chr6:28403275-28403384	110	chr6:28411176,28403237+28403275-28403384,28394182	C3	35	94	49.42	13.51	93.33	79.82	PanAS
PTEN	HsaEX0050780	chr10:89702368-89702526	159	chr10:89693008,89702368-89702526,89710826	C3	35	94	35.76	9.91	91.02	81.11	PanAS
SOX6	HsaEX0061075	chr11:16117542-16117664	123	chr11:16119155,16117542-16117664,16077447	S	34	94	37.91	1.96	90	88.04	PanAS
IL18BP	HsaEX0031390	chr11:71710305-71710416	112	chr11:71710065,71710274+71710305-71710416,71710846+71710973	C1	34	94	21.35	2.13	36.96	34.83	PanAS
RP11-314N13.4	HsaEX0054623	chr20:1330983-1331125	143	chr20:1306173+1306426,1330983-1331125,1353722	C3	34	94	53.03	0	93.95	93.95	PanAS
FAM176A	HsaEX0024196	chr2:75749491-75749613	123	chr2:75787806,75749491-75749613,75745334	C2	34	94	70.42	37.58	100	62.42	PanAS
TMEM200A	HsaEX0065690	chr6:130706318-130706381	64	chr6:130687669,130706318-130706381,130761552	S	34	94	63.03	0	92.22	92.22	PanAS
AC005726.6	HsaEX0000876	chr17:26937434-26937717	284	chr17:26938161,26937434-26937717,26932233	C2	34	94	37.28	6.29	78.93	72.64	PanAS
COX4I2	HsaEX0016908	chr20:30231207-30231338	132	chr20:30227900,30231207-30231338,30232571	S	33	94	78.85	58.42	96.83	38.41	PanAS
TMEM139	HsaEX0065481	chr7:142983070-142983264	195	chr7:142982538+142982542,142983034+142983037+142983070-142983264+142983295,142983517+142983639	C1	33	94	55.9	28.79	100	71.21	PanAS
ZSCAN23	HsaEX0074571	chr6:28403636-28404120	485	chr6:28411176,28403636-28404120,28394182	C3	33	94	40.3	7.94	72.97	65.03	PanAS
ZNF681	HsaEX0074178	chr19:23937625-23937699	75	chr19:23941549,23937625-23937699+23937703+23937720,23928125	C3	33	94	59.72	17.86	98.73	80.87	PanAS
AC009948.3	HsaEX0001014	chr2:179464321-179464477	157	chr2:179462408,179464321-179464477,179465203+179465285+179465288	C1	33	94	27.73	0	71.53	71.53	PanAS
MPV17L	HsaEX0040037	chr16:15494644-15494714	71	chr16:15490064,15494644-15494714,15501681	S	33	94	64.4	26.07	92.35	66.28	PanAS
FBF1	HsaEX0024980	chr17:73935899-73935963	65	chr17:73936929,73935899-73935963,73934313	S	33	94	30.24	0	52.08	52.08	PanAS
SCML2	HsaEX0056532	chrX:18260559-18260710	152	chrX:18264697,18260559-18260710,18259499	S	32	94	55.76	16.05	91.37	75.32	PanAS
ETAA1	HsaEX0023257	chr2:67630357-67630976	620	chr2:67630106,67630357-67630976,67632129+67632368	S	32	94	68.49	25	92.06	67.06	PanAS
PLAG1	HsaEX0048005	chr8:57080796-57080945	150	chr8:57083650,57080587+57080796-57080945,57080062	S	32	94	47.12	0	92.73	92.73	PanAS
RP11-187C18.3	HsaEX0054491	chr9:45557901-45558076	176	chr9:45442175,45557901-45558076,45562968	S	32	94	33.79	5.98	86.91	80.93	PanAS
GTPBP1	HsaEX0029025	chr22:39130155-39130237	83	chr22:39126664+39126886,39130155-39130237,39130329	S	32	94	73.54	31.91	100	68.09	PanAS
BICD1	HsaEX0008081	chr12:32491748-32491913	166	chr12:32490640+32490750,32491720+32491748-32491913,32520594+32520604	C1	32	94	26.26	0	56	56	PanAS
RPS6KL1	HsaEX0055666	chr14:75385216-75385308	93	chr14:75386548,75385216-75385308,75378544	C1	32	94	64.05	21.5	95.91	74.41	PanAS
RP11-86H7.1	HsaEX0055174	chr1:95197814-95197993	180	chr1:95285512,95197814-95197993,95145163	C2	32	94	71.25	26.83	100	73.17	PanAS
ELOVL7	HsaEX0022234	chr5:60095007-60095057	51	chr5:60139987,60095007-60095057,60083258	C1	32	94	72.06	18.13	100	81.87	PanAS
PRKCB	HsaEX0050140	chr16:24225979-24226194	216	chr16:24202551,24225979-24226194,24231282	S	32	94	64.92	9.07	90.08	81.01	PanAS
MFAP3L	HsaEX0038952	chr4:170927754-170927887	134	chr4:170947385,170927754-170927887,170927161	C1	32	94	56.57	18.08	100	81.92	PanAS
WDR52	HsaEX0071180	chr3:113052253-113052430	178	chr3:113060591,113052253-113052430,113049515	C2	32	94	73.04	41.72	100	58.28	PanAS
ROBO2	HsaEX0054210	chr3:77691822-77692094	273	chr3:77684194,77691822-77692094,77693855	S	31	94	34.04	6.75	84.62	77.87	PanAS
SYTL4	HsaEX0063329	chrX:99986406-99986493	88	chrX:99986991,99986406-99986493,99958181	C3	31	94	27.47	1.77	47.27	45.5	PanAS
SYTL4	HsaEX0063330	chrX:99959807-99959882	76	chrX:99986991,99959807-99959882,99958181	C2	31	94	41.36	6.71	91.25	84.54	PanAS
WDR31	HsaEX0071060	chr9:116093264-116093393	130	chr9:116094187+116094258,116093264-116093393+116093396,116091235	S	31	94	71.29	41.38	98.01	56.63	PanAS
PRDM8	HsaEX0049976	chr4:81115267-81115393	127	chr4:81105209+81105505,81115267-81115393,81117506	C2	31	94	68.52	20.45	96.3	75.85	PanAS
NR4A2	HsaEX0043725	chr2:157182824-157182840	17	chr2:157183230,157182824-157182840,157182719+157182786	S	31	94	69.91	0	90.1	90.1	PanAS
GS1-124K5.2	HsaEX0028796	chr7:65941246-65941314	69	chr7:65943996,65941246-65941314,65915223	C1	31	94	62.3	13.42	100	86.58	PanAS
FAM160A1	HsaEX0024082	chr4:152403676-152403800	125	chr4:152375960,152403676-152403800+152456052,152487290	C2	31	94	65.58	2.93	100	97.07	PanAS
BAT2D1	HsaEX0007661	chr1:171560294-171560339	46	chr1:171557644,171560291+171560294-171560339+171560343,171560726+171560735	C3	108	93	40.15	6.25	83.85	77.6	PanAS
GNAS	HsaEX0027840	chr20:57474530-57474532	3	chr20:57474040,57474530-57474532,57478586	MIC	108	93	14.57	6.46	28.94	22.48	PanAS
LTA4H	HsaEX0036880	chr12:96397616-96397698	83	chr12:96400092,96397616-96397698+96397759,96396842	S	107	93	78.77	49.61	94.06	44.45	PanAS
SFRS11	HsaEX0057640	chr1:70697542-70697658	117	chr1:70694238,70697542-70697658,70697951	S	107	93	27.69	3.36	81.36	78	PanAS
SEC31A	HsaEX0056949	chr4:83782784-83782861	78	chr4:83784471,83782784-83782861,83778917	C2	107	93	46.75	6.34	98	91.66	PanAS
R3HDM2	HsaEX0051536	chr12:57686355-57686450	96	chr12:57689182,57686355-57686450,57682823	C1	107	93	70.2	42.51	96.89	54.38	PanAS
KIAA0494	HsaEX0033666	chr1:47154025-47154216	192	chr1:47155259,47154025-47154216,47152542	S	106	93	56.89	11.47	100	88.53	PanAS
ECHDC1	HsaEX0021497	chr6:127637595-127637647	53	chr6:127648147,127637595-127637647,127636041	S	105	93	70.75	37.25	94.29	57.04	PanAS
DDX46	HsaEX0018953	chr5:134152756-134152758	3	chr5:134152293,134152756-134152758,134153186	MIC	105	93	79.48	51.61	100	48.39	PanAS
NAP1L4	HsaEX0041642	chr11:2970457-2970494	38	chr11:2972489,2970457-2970494,2966873+2966876	S	104	93	20.72	3.02	57.39	54.37	PanAS
MAPK14	HsaEX0037751	chr6:36063764-36063843	80	chr6:36044385,36063764-36063843,36070348	C3	103	93	67.64	17.56	100	82.44	PanAS
WSB1	HsaEX0071632	chr17:25634770-25634945	176	chr17:25633908,25634259+25634770-25634945,25636126	S	103	93	55.08	2.78	97.29	94.51	PanAS
GTF3C5	HsaEX0029014	chr9:135930331-135930351	21	chr9:135930196,135930331-135930351,135931399	S	102	93	22.27	0	49.1	49.1	PanAS
PCGF3	HsaEX0045876	chr4:726233-726287	55	chr4:724899,726189+726205+726233-726287,727461+727464	S	102	93	31.21	6.4	62.96	56.56	PanAS
DLG1	HsaEX0019879	chr3:196888511-196888609	99	chr3:196921296,196888511-196888609,196876667	C1	102	93	39.13	0	83.68	83.68	PanAS
GGCX	HsaEX0027392	chr2:85787938-85788108	171	chr2:85788509,85787938-85788108,85786198	S	102	93	75.68	21.79	98.55	76.76	PanAS
PTPRA	HsaEX0051075	chr20:2928628-2928670	43	chr20:2903931,2928628-2928670,2944918	S	102	93	75.69	25.33	100	74.67	PanAS
FLAD1	HsaEX0025883	chr1:154962056-154962183	128	chr1:154961174+154961325,154962036+154962056-154962183,154962635+154962666	C1	102	93	74.27	10.89	94.87	83.98	PanAS
SMPD4	HsaEX0060507	chr2:130910616-130910744	129	chr2:130910892,130910616-130910744,130910457	S	102	93	72.69	42.08	100	57.92	PanAS
UBE3A	HsaEX0068829	chr15:25654235-25654354	120	chr15:25683636,25654235-25654354,25650649	C3	101	93	66.64	25.31	97.22	71.91	PanAS
PQLC1	HsaEX0049865	chr18:77693969-77694022	54	chr18:77703329,77693969-77694022,77679400	C1	101	93	44.54	3.02	91.35	88.33	PanAS
GUSB	HsaEX0029116	chr7:65439906-65440058	153	chr7:65441002,65439806+65439906-65440058,65439691	S	101	93	62.19	12.82	98.37	85.55	PanAS
GIGYF2	HsaEX0027460	chr2:233589284-233589401	118	chr2:233587368,233589284-233589401,233599865	C3	101	93	22.65	2.8	51.44	48.64	PanAS
CHD3	HsaEX0015063	chr17:7810919-7811020	102	chr17:7810780+7810806,7810919-7811020,7811209+7811212	S	100	93	71.74	7.87	100	92.13	PanAS
MAP7D1	HsaEX0037700	chr1:36640499-36640609	111	chr1:36639079,36640499-36640609,36641800	S	100	93	71.95	46.44	96.84	50.4	PanAS
CDK5RAP2	HsaEX0014321	chr9:123169290-123169526	237	chr9:123170625,123169290-123169526,123166391	S	100	93	77.18	46.9	95.53	48.63	PanAS
ATRX	HsaEX0007239	chrX:76949313-76949426	114	chrX:76952065,76949313-76949426,76944417+76944420	S	99	93	74.55	42.35	100	57.65	PanAS
IFT46	HsaEX0031048	chr11:118428453-118428605	153	chr11:118430500,118428453-118428605,118427760	S	99	93	19.45	3.9	47.09	43.19	PanAS
DCAF10	HsaEX0018592	chr9:37842086-37842283	198	chr9:37819398,37842086-37842283,37854777	S	99	93	74.44	45.11	94.37	49.26	PanAS
PRUNE	HsaEX0050507	chr1:150991036-150991145	110	chr1:150990380+150990478,150990943+150991033+150991036-150991145,150997087+150997090	C1	99	93	70.28	16	96.75	80.75	PanAS
MRPL55	HsaEX0040161	chr1:228296656-228296722	67	chr1:228296850,228296656-228296722,228296175	C3	99	93	65.87	25.89	94.1	68.21	PanAS
MIF4GD	HsaEX0039286	chr17:73265428-73265529	102	chr17:73266195,73265428-73265529+73265550,73264273	S	98	93	20.37	2.51	50.75	48.24	PanAS
ZDHHC17	HsaEX0072478	chr12:77214838-77214947	110	chr12:77209799,77214838-77214947,77216186	S	98	93	21.13	3.23	73.17	69.94	PanAS
CCM2	HsaEX0013594	chr7:45077852-45078025	174	chr7:45039962,45077852-45078025,45103517	C1	98	93	76.14	2.94	97.06	94.12	PanAS
DHRSX	HsaEX0019550	chrX:2310395-2310515	121	chrX:2326786,2291084+2310395-2310515,2209644	C1	98	93	23.9	4.22	59.74	55.52	PanAS
TCOF1	HsaEX0064232	chr5:149751569-149751799	231	chr5:149749165,149751569-149751799,149753737	S	95	93	76.72	41.67	96.89	55.22	PanAS
TAB2	HsaEX0063347	chr6:149663821-149663969	149	chr6:149639151,149663821-149663969,149691045	C1	95	93	28.56	6.8	79.27	72.47	PanAS
VRK2	HsaEX0070691	chr2:58381894-58381937	44	chr2:58373609,58381889+58381894-58381937,58386484	S	94	93	23.38	5.69	78.62	72.93	PanAS
ATXN7	HsaEX0007289	chr3:63983297-63983363	67	chr3:63982159,63983297-63983363,63985126	S	92	93	30.5	0	81.81	81.81	PanAS
UBXN2B	HsaEX0069063	chr8:59325858-59325930	73	chr8:59324028,59325858-59325930,59329409	S	92	93	25.11	6.08	73.22	67.14	PanAS
CHFR	HsaEX0015161	chr12:133446205-133446261	57	chr12:133447310,133446205-133446261+133446384+133446420,133438220	C1	92	93	74.11	30.69	100	69.31	PanAS
TRIT1	HsaEX0067279	chr1:40318403-40318548	146	chr1:40319642,40318403-40318548+40318623,40315933	C1	91	93	76.09	5.1	100	94.9	PanAS
SMG7	HsaEX0060475	chr1:183471435-183471526	92	chr1:183441784,183471388+183471435-183471526,183481972+183481976	C1	91	93	26.38	0	72.84	72.84	PanAS
AC069513.3	HsaEX0001301	chr3:195416210-195416309	100	chr3:195415668,195416210-195416309,195423232	C2	91	93	66.28	31.53	97.04	65.51	PanAS
UBR2	HsaEX0068949	chr6:42584978-42585076	99	chr6:42583828,42584978-42585076,42600290	C3	91	93	19.32	6.67	43.33	36.66	PanAS
FAM45A	HsaEX0024459	chr10:120864276-120864534	259	chr10:120863709,120864276-120864534,120864823	C3	91	93	29.89	4.62	78.12	73.5	PanAS
ZFX	HsaEX0072711	chrX:24191724-24191840	117	chrX:24190917,24191724-24191840,24197300+24197369	C1	90	93	25.5	0	73.01	73.01	PanAS
KLHL24	HsaEX0034822	chr3:183354009-183354099	91	chr3:183353535+183353581,183354009-183354099,183361268	C1	90	93	24.63	0	65.04	65.04	PanAS
VGLL4	HsaEX0070334	chr3:11684911-11685117	207	chr3:11744445,11684911-11685117,11643496	S	90	93	39.3	0.91	81.34	80.43	PanAS
GAA	HsaEX0026727	chr17:78075610-78075689	80	chr17:78075424+78075519,78075610-78075689+78075724,78078354	S	90	93	64.87	27.54	98.95	71.41	PanAS
CTC-358I24.1	HsaEX0017699	chr5:87581561-87581668	108	chr5:87566402,87581558+87581561-87581668,87732090	C3	90	93	61.53	10.87	100	89.13	PanAS
BTN2A1	HsaEX0008680	chr6:26463025-26463125	101	chr6:26460056,26463025-26463125,26463472	S	90	93	32.61	6.44	78.45	72.01	PanAS
MDM4	HsaEX0038414	chr1:204506558-204506625	68	chr1:204501374,204501897+204506558-204506625,204507337	S	90	93	67.51	17.98	100	82.02	PanAS
IKBKB	HsaEX0031246	chr8:42146159-42146246	88	chr8:42129723,42146152+42146159-42146246,42147674	C1	89	93	74.4	30.77	95.92	65.15	PanAS
SPP1	HsaEX0061517	chr4:88901545-88901586	42	chr4:88901278,88901545-88901586,88902627	S	88	93	72.33	52.46	94.62	42.16	PanAS
FASTKD1	HsaEX0024946	chr2:170394523-170394632	110	chr2:170396561,170394523-170394632+170394651,170393850	S	88	93	77.3	33.31	100	66.69	PanAS
WDR45	HsaEX0071143	chrX:48935302-48935406	105	chrX:48935496,48935302-48935406,48934409+48934412	S	87	93	72.75	24.45	94.97	70.52	PanAS
MRPL43	HsaEX0040138	chr10:102743705-102743831	127	chr10:102746506,102743705-102743831,102743574	C2	87	93	25.69	5	62.5	57.5	PanAS
PIAS2	HsaEX0047312	chr18:44483490-44483598	109	chr18:44497285,44483490-44483598,44471017	S	87	93	31.37	2.7	73.24	70.54	PanAS
RAI14	HsaEX0052011	chr5:34813679-34813765	87	chr5:34812313,34813679-34813765,34814688	S	86	93	51.43	2.56	97.95	95.39	PanAS
EPB41L1	HsaEX0022643	chr20:34797410-34797820	411	chr20:34785963,34797410-34797820,34800194	S	86	93	53.1	11.57	97.53	85.96	PanAS
MYO1B	HsaEX0041115	chr2:192267358-192267444	87	chr2:192265561,192267358-192267444,192272841	C3	86	93	49.82	3.18	95.86	92.68	PanAS
MTX3	HsaEX0040763	chr5:79281394-79281482	89	chr5:79282773,79281394-79281482,79279617	S	85	93	35.89	4.71	93.94	89.23	PanAS
NR1H3	HsaEX0043670	chr11:47280736-47280810	75	chr11:47270415+47270550,47280652+47280731+47280736-47280810,47281337+47281342	C2	85	93	55.3	0.61	97.04	96.43	PanAS
MLLT10	HsaEX0039550	chr10:21971154-21971186	33	chr10:21970305,21971154-21971186,22002701	C1	85	93	71.99	21.91	100	78.09	PanAS
ABCC5	HsaEX0000490	chr3:183703092-183703166	75	chr3:183705558,183703092-183703166+183703243,183700795	C2	85	93	37.46	5.59	86.67	81.08	PanAS
NEDD1	HsaEX0042403	chr12:97306501-97306595	95	chr12:97303673,97306501-97306595,97311399	C1	85	93	75.92	42.7	100	57.3	PanAS
PRPSAP2	HsaEX0050409	chr17:18768782-18768877	96	chr17:18761574,18768782-18768877,18769115	C1	85	93	75.13	44.5	100	55.5	PanAS
PLXNB2	HsaEX0048579	chr22:50733155-50733207	53	chr22:50745982,50733155-50733207,50729026	S	85	93	65.56	31.17	95.92	64.75	PanAS
TMTC4	HsaEX0066118	chr13:101322614-101322823	210	chr13:101326998+101327194,101322537+101322614-101322823,101321048	S	84	93	67.83	23.57	95.24	71.67	PanAS
USP53	HsaEX0069974	chr4:120135225-120135377	153	chr4:120133875+120134028+120134373,120135225-120135377,120138705	S	84	93	44.13	2.86	95.26	92.4	PanAS
AXL	HsaEX0007397	chr19:41745599-41745625	27	chr19:41745219,41745599-41745625,41748788	S	84	93	63.31	32.9	98	65.1	PanAS
CAPRIN2	HsaEX0012402	chr12:30873745-30873849	105	chr12:30876193,30873745-30873849,30869610	C3	84	93	72.21	34.73	97.44	62.71	PanAS
AHDC1	HsaEX0003232	chr1:27884816-27885041	226	chr1:27885217,27884816-27885041,27879696+27879801+27879815	S	84	93	68.86	20.51	95.2	74.69	PanAS
ZNF266	HsaEX0073290	chr19:9529442-9529571	130	chr19:9529727,9529438+9529442-9529571,9529307	C2	84	93	35.76	4.21	82.25	78.04	PanAS
HERC3	HsaEX0029768	chr4:89597369-89597392	24	chr4:89591403,89597369-89597392,89597485	S	83	93	78.85	18.87	97.18	78.31	PanAS
GK5	HsaEX0027525	chr3:141903553-141904635	1083	chr3:141904771,141903553-141904635,141901891	S	83	93	38.94	1.3	80.95	79.65	PanAS
DTX3	HsaEX0021131	chr12:57999367-57999514	148	chr12:57998641,57999127+57999354+57999367-57999514,57999973	C3	83	93	68.25	38.75	99.37	60.62	PanAS
ZNF558	HsaEX0073927	chr19:8932118-8932311	194	chr19:8932679,8932118-8932311,8931982	S	82	93	28.41	2.86	65.14	62.28	PanAS
RNF213	HsaEX0054049	chr17:78252563-78252709	147	chr17:78247203,78252563-78252709,78261614	S	82	93	17.4	0	44.91	44.91	PanAS
IFT88	HsaEX0031104	chr13:21142033-21142136	104	chr13:21141395,21142024+21142033-21142136,21148509+21148519	C1	82	93	22.17	3.64	86	82.36	PanAS
ZNF384	HsaEX0073549	chr12:6781516-6781698	183	chr12:6782382,6781516-6781698,6780004	S	82	93	28.41	4.67	71.71	67.04	PanAS
ANK2	HsaEX0004139	chr4:114295920-114296102	183	chr4:114294605,114295920-114296102,114302613	C1	82	93	45.53	4.85	97.14	92.29	PanAS
NFIB	HsaEX0042736	chr9:14102421-14102509	89	chr9:14120439,14102421-14102509,14088325	C3	82	93	25.78	2.98	68.85	65.87	PanAS
TEP1	HsaEX0064471	chr14:20840892-20841016	125	chr14:20841170,20840892-20841016,20839766+20839791	S	81	93	71.12	23.81	100	76.19	PanAS
FAM172A	HsaEX0024170	chr5:93410351-93410474	124	chr5:93446893+93447216,93410351-93410474,93388932	C1	81	93	67	40.28	97.32	57.04	PanAS
SRPK2	HsaEX0061761	chr7:104909253-104909316	64	chr7:105029095,104909253-104909316,104844232	S	81	93	41.44	0.95	96.2	95.25	PanAS
SLC2A8	HsaEX0059307	chr9:130160184-130160390	207	chr9:130159565,130160184-130160390,130162186	C2	81	93	66.31	11.61	96.06	84.45	PanAS
NFIA	HsaEX0042731	chr1:61892137-61892228	92	chr1:61872399,61892137-61892228,61920975	S	81	93	76.81	55.56	100	44.44	PanAS
NHEDC2	HsaEX0042864	chr4:103978958-103979128	171	chr4:103987484,103978958-103979128,103971539	S	76	93	76.69	41.54	95.45	53.91	PanAS
SORBS1	HsaEX0060965	chr10:97181947-97181973	27	chr10:97192205,97181947-97181973,97181830	S	75	93	51.07	6.31	100	93.69	PanAS
HSD17B14	HsaEX0030535	chr19:49334925-49335016	92	chr19:49335923,49334925-49335016,49318398	S	75	93	74.33	37.44	100	62.56	PanAS
TUBD1	HsaEX0068306	chr17:57968192-57968289	98	chr17:57970058+57970149,57968192-57968289+57968402,57963591	S	75	93	73.33	41.18	96.21	55.03	PanAS
TMEM8B	HsaEX0066007	chr9:35835008-35835215	208	chr9:35834647,35835008-35835215,35841131	C1	75	93	72.84	0	100	100	PanAS
SYNE1	HsaEX0063162	chr6:152621776-152621916	141	chr6:152623004,152621776-152621916,152615262	S	74	93	62.69	23.74	100	76.26	PanAS
ZNF138	HsaEX0073044	chr7:64275296-64275422	127	chr7:64254949,64275296-64275422,64291829	C2	74	93	66.07	10.37	98.66	88.29	PanAS
DSC2	HsaEX0020995	chr18:28648265-28648310	46	chr18:28648860,28648265-28648310,28648178	S	74	93	21.51	3.99	67.52	63.53	PanAS
MCM9	HsaEX0038281	chr6:119147310-119147455	146	chr6:119147945,119147310-119147455,119137457	S	73	93	74.61	37.04	98.43	61.39	PanAS
EHBP1L1	HsaEX0021841	chr11:65349010-65349436	427	chr11:65348722+65348797+65348844,65349010-65349436,65351712	C1	73	93	78.27	45.79	99.41	53.62	PanAS
ZFX	HsaEX0072709	chrX:24179832-24179959	128	chrX:24170947,24179832-24179959,24190832	S	72	93	27.95	0	71.32	71.32	PanAS
FAM192A	HsaEX0024329	chr16:57208532-57208600	69	chr16:57212414,57208353+57208532-57208600,57207708+57207781	C2	72	93	24.34	4.91	64.51	59.6	PanAS
WDR27	HsaEX0071053	chr6:170063659-170063745	87	chr6:170064262,170063659-170063745+170063802+170063840+170063897,170062517+170062520	C1	71	93	50.85	1.33	95.82	94.49	PanAS
ZNF711	HsaEX0074247	chrX:84522284-84522421	138	chrX:84520261,84522284-84522421,84523300+84523303	S	70	93	23.23	6.09	41.67	35.58	PanAS
NAB1	HsaEX0041542	chr2:191518453-191518506	54	chr2:191514708,191518453-191518506,191523884+191524003	C2	68	93	31.49	4.2	66.84	62.64	PanAS
SORBS2	HsaEX0060986	chr4:186611716-186611765	50	chr4:186696381+186696385,186611716-186611765,186599976	C2	68	93	51.74	8.06	100	91.94	PanAS
DYSF	HsaEX0021366	chr2:71847677-71847739	63	chr2:71840540,71847677-71847739,71871095	S	67	93	40.46	6.31	72.57	66.26	PanAS
FBXL4	HsaEX0025194	chr6:99382638-99382755	118	chr6:99395682,99382638-99382755,99375698	S	67	93	71.97	35.66	100	64.34	PanAS
ZBTB25	HsaEX0072128	chr14:64969619-64969845	227	chr14:64970379,64969619-64969845,64969533	C3	67	93	31.4	0	75.23	75.23	PanAS
METTL8	HsaEX0038936	chr2:172248553-172248707	155	chr2:172290393,172248553-172248707,172217023	C2	67	93	74.97	55.41	96.88	41.47	PanAS
NBPF15	HsaEX0041880	chr1:148565503-148565693	191	chr1:148561029,148565503-148565693,148566850	C3	67	93	28.31	0.62	54.42	53.8	PanAS
TSPAN18	HsaEX0067645	chr11:44919303-44919379	77	chr11:44882020,44919303-44919379,44927958	S	61	93	21.55	3.23	49.7	46.47	PanAS
DDX26B	HsaEX0018910	chrX:134704361-134704471	111	chrX:134703356,134704361-134704471,134706740	S	60	93	55.13	10.23	97.14	86.91	PanAS
GSTO2	HsaEX0028885	chr10:106039128-106039229	102	chr10:106037776+106037869+106037874,106039128-106039229,106057336	C1	60	93	65.1	23.08	100	76.92	PanAS
IMPDH1	HsaEX0031612	chr7:128049343-128049406	64	chr7:128049810,128049343-128049406+128049420,128045919	C1	60	93	22.62	5.26	50.82	45.56	PanAS
COL12A1	HsaEX0016284	chr6:75884754-75885026	273	chr6:75887379,75884754-75885026,75875495	S	60	93	52.07	6.78	95.78	89	PanAS
SEZ6L2	HsaEX0057561	chr16:29884026-29884064	39	chr16:29884561,29884026-29884064,29883847	S	60	93	65.31	30.69	100	69.31	PanAS
KIAA0427	HsaEX0033622	chr18:46066129-46066202	74	chr18:46065683,46066129-46066202,46145909	S	59	93	27.98	1.08	63.39	62.31	PanAS
NAALADL1	HsaEX0041526	chr11:64813917-64813998	82	chr11:64815119,64813917-64813998,64813834	C2	59	93	29.58	0	91.22	91.22	PanAS
B3GALNT1	HsaEX0007413	chr3:160822573-160822683	111	chr3:160822791+160823023,160822567+160822573-160822683,160822194	S	58	93	33.57	7.01	73.72	66.71	PanAS
USP35	HsaEX0069816	chr11:77909629-77909743	115	chr11:77909114,77909629-77909743+77909764,77910641	C1	58	93	32.81	0	72.32	72.32	PanAS
RGN	HsaEX0053333	chrX:46949175-46949390	216	chrX:46943999,46949175-46949390,46951077	C1	58	93	55	18.52	100	81.48	PanAS
NEXN	HsaEX0042624	chr1:78390873-78390914	42	chr1:78383958,78390873-78390914,78392099	S	58	93	66.68	18.04	96.72	78.68	PanAS
C11orf73	HsaEX0009057	chr11:86037555-86037718	164	chr11:86030101,86037555-86037718,86048421	C3	58	93	31.03	0	72.53	72.53	PanAS
TNXB	HsaEX0066424	chr6:32039767-32040075	309	chr6:32041424,32039767-32040075,32038191	S	57	93	78.55	59.59	93.88	34.29	PanAS
PILRA	HsaEX0047635	chr7:99987511-99987729	219	chr7:99972056,99987511-99987729,99995502	S	56	93	62.51	8.43	100	91.57	PanAS
GTPBP1	HsaEX0029022	chr22:39131179-39131315	137	chr22:39130398+39130402,39131179-39131315,39132034	C1	46	93	28.96	1.59	69.81	68.22	PanAS
C14orf45	HsaEX0009496	chr14:74512763-74512833	71	chr14:74507348,74512763-74512833,74514633	C1	46	93	57.83	7.25	95.28	88.03	PanAS
ZNF484	HsaEX0073772	chr9:95637297-95637341	45	chr9:95640102+95640172,95637297-95637341,95618600	C1	46	93	62.15	24.09	98.09	74	PanAS
TNXB	HsaEX0066431	chr6:32055028-32055768	741	chr6:32056562,32055028-32055768,32053895	S	46	93	61.34	11.32	96.7	85.38	PanAS
RP11-1198D22.1	HsaEX0054396	chr5:70438472-70438586	115	chr5:70493473,70438472-70438586,70424580	S	45	93	68.92	29.73	100	70.27	PanAS
SMAD9	HsaEX0060237	chr13:37441410-37441520	111	chr13:37446795,37441410-37441520,37439895	S	45	93	66.33	26.09	97.44	71.35	PanAS
XRCC3	HsaEX0071854	chr14:104179212-104179268	57	chr14:104181674+104181761,104179212-104179268+104179271+104179278+104179293+104179305,104177904+104177998	S	45	93	61.47	28.42	97.74	69.32	PanAS
GSDMB	HsaEX0028807	chr17:38063214-38063240	27	chr17:38064429,38063214-38063240,38062524	C2	45	93	74	16.74	93.9	77.16	PanAS
FAM47E	HsaEX0024462	chr4:77177331-77177676	346	chr4:77172973,77177331-77177676,77184857	C1	45	93	40.76	4.62	95.29	90.67	PanAS
ABCA5	HsaEX0000280	chr17:67321840-67321958	119	chr17:67323193,67321840-67321958,67310571	C1	44	93	65.56	24.49	92.21	67.72	PanAS
CLEC7A	HsaEX0015638	chr12:10277686-10277772	87	chr12:10277896,10277686-10277772,10271189	C3	44	93	24.76	7.69	73.75	66.06	PanAS
INTU	HsaEX0031963	chr4:128606597-128606724	128	chr4:128605641,128606597-128606724,128608833+128608896	S	43	93	30.42	6.38	73.63	67.25	PanAS
SYT7	HsaEX0063286	chr11:61314649-61314780	132	chr11:61318856,61314649-61314780,61300596	C2	43	93	46.14	2.44	87.05	84.61	PanAS
KLHL3	HsaEX0034844	chr5:136972983-136973084	102	chr5:136974642,136972983-136973084,136969854	S	43	93	69.02	40	100	60	PanAS
C16orf93	HsaEX0009729	chr16:30770663-30770779	117	chr16:30771605,30770663-30770779,30768975	C2	43	93	49.62	6.5	91.18	84.68	PanAS
DYX1C1	HsaEX0021369	chr15:55724695-55724800	106	chr15:55727103,55724695-55724800,55722977	S	43	93	68.79	36.91	94.27	57.36	PanAS
PRDM2	HsaEX0049939	chr1:14104913-14104992	80	chr1:14099683,14104913-14104992,14142922	C1	42	93	70.92	38.49	93.26	54.77	PanAS
CES8	HsaEX0014907	chr16:67040294-67040422	129	chr16:67039296+67039518,67040294-67040422+67040597,67042877	C2	42	93	68.03	28.7	100	71.3	PanAS
ZFP1	HsaEX0072635	chr16:75182799-75183165	367	chr16:75182541+75182560,75182799-75183165,75186807	S	42	93	30.53	6.01	67.18	61.17	PanAS
RFX2	HsaEX0053241	chr19:6026174-6026248	75	chr19:6039991,6026174-6026248,6016282	S	41	93	65.09	17.65	97.37	79.72	PanAS
NOD1	HsaEX0043255	chr7:30503225-30503314	90	chr7:30518222,30503152+30503225-30503314,30499657	C1	41	93	46.67	0	100	100	PanAS
RP11-195F19.9	HsaEX0054501	chr9:34678188-34678265	78	chr9:34665764,34677910+34678093+34678097+34678188-34678265,34680903	C1	41	93	59.12	10.1	93.55	83.45	PanAS
MED15	HsaEX0038588	chr22:20853610-20853653	44	chr22:20853078,20853610-20853653,20855028	C2	30	93	32.81	7.59	58.84	51.25	PanAS
ADCYAP1R1	HsaEX0002786	chr7:31121328-31121369	42	chr7:31120248,31121328-31121369,31123756	C3	29	93	37.94	7.32	65.22	57.9	PanAS
KIAA1377	HsaEX0034048	chr11:101826993-101827674	682	chr11:101818873,101826523+101826993-101827674,101828899	S	29	93	48.03	4.76	97.26	92.5	PanAS
HIVEP3	HsaEX0030068	chr1:41990406-41990581	176	chr1:42041215,41990406-41990581,41984159	C1	29	93	47.14	0	88.89	88.89	PanAS
ZNF214	HsaEX0073188	chr11:7040914-7040976	63	chr11:7041304,7040914-7040976,7024082+7024086	S	29	93	21.31	5.79	40.74	34.95	PanAS
RNF212	HsaEX0054033	chr4:1075207-1075255	49	chr4:1075355,1075207-1075255,1073476	C1	29	93	67.08	36.63	95	58.37	PanAS
IL20RA	HsaEX0031439	chr6:137332411-137332589	179	chr6:137338105,137332411-137332589,137330563+137330629	S	28	93	71.71	49.23	95.65	46.42	PanAS
ADORA1	HsaEX0002844	chr1:203097406-203097560	155	chr1:203097056+203097062,203097406-203097560,203097913+203097989	S	28	93	33.82	4.44	78.34	73.9	PanAS
C15orf33	HsaEX0009562	chr15:49869826-49869861	36	chr15:49880213,49869826-49869861,49869042	C1	28	93	76.42	22.53	100	77.47	PanAS
ST5	HsaEX0062012	chr11:8860857-8860897	41	chr11:8892501,8860857-8860897,8832878+8832882	C2	28	93	68.78	39.39	100	60.61	PanAS
AC012309.5	HsaEX0001069	chr19:37753257-37753336	80	chr19:37746884,37753257-37753336,37753444	C1	28	93	33.15	0	73.06	73.06	PanAS
COL23A1	HsaEX0016437	chr5:177674776-177674832	57	chr5:177675193,177674776-177674832,177674553	C1	28	93	79.05	53.08	92.9	39.82	PanAS
BCS1L	HsaEX0007953	chr2:219525030-219525144	115	chr2:219524523,219525030-219525144,219525662	C2	28	93	34.3	7.02	52.4	45.38	PanAS
BAI3	HsaEX0007584	chr6:69347283-69347454	172	chr6:69345892,69347283-69347454,69348553	S	27	93	49.06	2.7	95.35	92.65	PanAS
PLA2R1	HsaEX0047990	chr2:160796889-160797078	190	chr2:160798257,160796889-160797078,160788809+160789163	S	27	93	32.22	4.17	79.59	75.42	PanAS
CD22	HsaEX0013788	chr19:35822922-35822977	56	chr19:35820133,35822809+35822830+35822922-35822977,35823450+35823456+35823481+35823497+35823556	C1	27	93	53.48	3.03	100	96.97	PanAS
PCGF2	HsaEX0045873	chr17:36904132-36904224	93	chr17:36904449,36904132-36904224,36896695	S	27	93	48.32	20.12	95.78	75.66	PanAS
IDI1	HsaEX0030899	chr10:1100108-1100185	78	chr10:1102249+1102288,1100108-1100185,1089333	C3	27	93	60.36	10.36	93.02	82.66	PanAS
C9orf68	HsaEX0011708	chr9:4656041-4656089	49	chr9:4661899,4656041-4656089,4635399	C1	27	93	68.5	18.92	94.14	75.22	PanAS
C17orf53	HsaEX0009765	chr17:42230005-42230145	141	chr17:42226395,42230005-42230145,42231921+42231924	C2	27	93	65.95	15.74	92.25	76.51	PanAS
FAM151B	HsaEX0024060	chr5:79801762-79801895	134	chr5:79797736,79801762-79801895,79809423	C1	27	93	28.32	0	49.86	49.86	PanAS
GBP5	HsaEX0027169	chr1:89736438-89736545	108	chr1:89738135,89736438-89736545,89735257	S	27	93	70.1	45.21	100	54.79	PanAS
CCDC30	HsaEX0013203	chr1:43000560-43000660	101	chr1:42964587,43000560-43000660,43031967	C2	27	93	30.56	1.46	97.43	95.97	PanAS
CCDC7	HsaEX0013425	chr10:32806873-32806903	31	chr10:32762951,32806873-32806903,32832228	C3	27	93	34.76	7.14	92.01	84.87	PanAS
RP4-798C17.6	HsaEX0055332	chr7:144047811-144047917	107	chr7:144051125,144047811-144047917,143951789	C3	27	93	54.77	3.45	94.87	91.42	PanAS
HS3ST2	HsaEX0030502	chr16:22865985-22866102	118	chr16:22826416,22865985-22866102,22926265	C1	27	93	52.53	15.57	94.98	79.41	PanAS
POLR1C	HsaEX0049047	chr6:43488920-43489217	298	chr6:43488786,43488920-43489217,43496987	S	27	93	76.41	50	94.9	44.9	PanAS
REPS1	HsaEX0053051	chr6:139247538-139247615	78	chr6:139251114,139247538-139247615+139247618,139242261	S	106	92	53.26	9.86	97.15	87.29	PanAS
HNRNPD	HsaEX0030287	chr4:83292681-83292737	57	chr4:83294599,83292681-83292737,83280792	S	106	92	75.62	38.46	100	61.54	PanAS
VPS29	HsaEX0070549	chr12:110937340-110937351	12	chr12:110939222+110939854+110939865,110937340-110937351,110934008+110936664	MIC	106	92	43.29	0	89.19	89.19	PanAS
IL6ST	HsaEX0031527	chr5:55251853-55252063	211	chr5:55447758,55251853-55252063,55235958	C3	105	92	60.52	27.85	100	72.15	PanAS
CAMTA1	HsaEX0012299	chr1:6880241-6880310	70	chr1:6845635,6880241-6880310,6885152	S	105	92	76.62	56.53	100	43.47	PanAS
TCEAL8	HsaEX0064125	chrX:102509533-102509605	73	chrX:102510006,102509533-102509605,102508945	S	105	92	71.12	29.84	100	70.16	PanAS
PPP1R12A	HsaEX0049557	chr12:80199946-80200077	132	chr12:80201006,80199946-80200077+80200113,80199548	S	104	92	69.81	12.87	96.77	83.9	PanAS
MAPK14	HsaEX0037752	chr6:36067965-36068044	80	chr6:36044385,36067965-36068044,36070348	C3	104	92	33.58	2.42	82.28	79.86	PanAS
SAT2	HsaEX0056273	chr17:7530261-7530362	102	chr17:7530461,7530261-7530362,7530111	S	104	92	70.41	9.37	100	90.63	PanAS
EHBP1	HsaEX0021831	chr2:63215066-63215173	108	chr2:63206470,63215066-63215173,63217851	S	103	92	45.65	2.5	92.89	90.39	PanAS
NT5C2	HsaEX0044002	chr10:104865115-104865138	24	chr10:104865463,104865115-104865138,104861083	S	103	92	25.03	0	73.21	73.21	PanAS
BAT3	HsaEX0007684	chr6:31612084-31612129	46	chr6:31612302,31612084-31612129+31612191,31611971+31612004	S	103	92	34.09	3.03	72.2	69.17	PanAS
C12orf49	HsaEX0009206	chr12:117160872-117161028	157	chr12:117175595+117175659,117160872-117161028,117158252	C1	102	92	79.19	36.52	97.85	61.33	PanAS
USP4	HsaEX0069871	chr3:49348947-49349087	141	chr3:49362135,49348947-49349087,49348170	S	102	92	69.44	32.28	96.95	64.67	PanAS
RBCK1	HsaEX0052557	chr20:391056-391281	226	chr20:390669,391056-391281,398170	C1	102	92	29.98	4.08	80.05	75.97	PanAS
PPIL3	HsaEX0049439	chr2:201749985-201750066	82	chr2:201750421,201749985-201750066+201750090,201746211	C3	102	92	22.32	4.65	65.22	60.57	PanAS
RNF216	HsaEX0054071	chr7:5781379-5781446	68	chr7:5792477,5781379-5781446,5781275	S	101	92	23.15	1.49	59.5	58.01	PanAS
PEX26	HsaEX0046657	chr22:18567878-18568024	147	chr22:18566498,18567878-18568024,18570738	S	101	92	76.57	43.86	95.02	51.16	PanAS
CLK4	HsaEX0015705	chr5:178044345-178044432	88	chr5:178045557,178044345-178044432+178044435,178043949	S	100	92	68.25	9.79	97.52	87.73	PanAS
DNMT1	HsaEX0020476	chr19:10290863-10290910	48	chr19:10291026,10290863-10290910,10288043	S	100	92	16.92	2.63	41.84	39.21	PanAS
RIF1	HsaEX0053616	chr2:152324988-152325065	78	chr2:152324660,152324988-152325065,152325155	S	98	92	66.37	28.68	97.35	68.67	PanAS
ARFIP1	HsaEX0005367	chr4:153791905-153792000	96	chr4:153784866,153791905-153792000,153793604	S	98	92	57.37	6.72	97.36	90.64	PanAS
GIGYF2	HsaEX0027456	chr2:233565295-233565364	70	chr2:233562102,233565295-233565364,233568134	C1	98	92	26	0.38	71.08	70.7	PanAS
FGFR1OP	HsaEX0025674	chr6:167426996-167427055	60	chr6:167424381,167426996-167427055,167435897+167435900	S	98	92	33.24	0	83.08	83.08	PanAS
UNK	HsaEX0069420	chr17:73788394-73788559	166	chr17:73781065,73788394-73788559,73805841	C3	97	92	55.68	0	98.18	98.18	PanAS
GATAD2A	HsaEX0027109	chr19:19546940-19547028	89	chr19:19538801,19546940-19547028,19576149	C3	96	92	26.15	5.88	52.24	46.36	PanAS
ZNF263	HsaEX0073281	chr16:3335059-3335239	181	chr16:3334205,3335059-3335239,3339393	C2	95	92	30.27	0	73.72	73.72	PanAS
AKAP13	HsaEX0003375	chr15:86201768-86201821	54	chr15:86199018,86201768-86201821,86207794	C1	95	92	49.86	3.83	97.12	93.29	PanAS
BAG4	HsaEX0007545	chr8:38050206-38050313	108	chr8:38034657,38050206-38050313,38065030	S	93	92	70.66	39.4	100	60.6	PanAS
PRMT1	HsaEX0050262	chr19:50183397-50183495	99	chr19:50183182+50183186,50183397-50183495+50183510,50183744	S	93	92	32.57	4.17	82.22	78.05	PanAS
POLL	HsaEX0048976	chr10:103345623-103345913	291	chr10:103347003+103347049,103345619+103345623-103345913,103342648	C3	93	92	73.09	18.9	97.79	78.89	PanAS
SENP6	HsaEX0057212	chr6:76350400-76350420	21	chr6:76344527,76350400-76350420,76357447	S	93	92	74.04	35.33	94.54	59.21	PanAS
C10orf118	HsaEX0008779	chr10:115932900-115933024	125	chr10:115933774,115932900-115933024,115923088	S	91	92	23.65	4.93	63.53	58.6	PanAS
CTC-228N24.3	HsaEX0017682	chr5:127417665-127417883	219	chr5:127418427+127418662,127417665-127417883+127417886,127396936	C1	91	92	18.03	7.32	36.72	29.4	PanAS
CBLB	HsaEX0012737	chr3:105400323-105400454	132	chr3:105400568,105400323-105400454,105397415	S	90	92	71.76	41.67	100	58.33	PanAS
PQLC3	HsaEX0049874	chr2:11315094-11315135	42	chr2:11312171,11315081+11315094-11315135,11317863	C1	90	92	78.2	52.03	100	47.97	PanAS
ANKRD28	HsaEX0004446	chr3:15855747-15855816	70	chr3:15900884,15855747-15855816,15836813	S	90	92	25.99	5.88	90.21	84.33	PanAS
SLC30A6	HsaEX0059353	chr2:32422413-32422461	49	chr2:32419052,32422387+32422413-32422461,32422776	S	89	92	75.66	47.83	100	52.17	PanAS
RWDD3	HsaEX0056011	chr1:95709767-95710254	488	chr1:95699871,95709767-95710254,95712098	C2	89	92	69.31	9.35	100	90.65	PanAS
NRIP1	HsaEX0043828	chr21:16386665-16386787	123	chr21:16415816,16386665-16386787,16340847	C1	89	92	73.51	27.25	96.54	69.29	PanAS
RBM41	HsaEX0052717	chrX:106356627-106356698	72	chrX:106358582,106356627-106356698,106332069	C1	88	92	59.3	18.04	100	81.96	PanAS
RP4-564F22.2	HsaEX0055260	chr20:37050743-37050888	146	chr20:37055062,37050734+37050739+37050743-37050888,37049745	C3	88	92	39.28	0	85.25	85.25	PanAS
ITSN1	HsaEX0032618	chr21:35195791-35195957	167	chr21:35191627,35195791-35195957,35201928	C2	88	92	69.76	14.33	96.66	82.33	PanAS
BTRC	HsaEX0008704	chr10:103190102-103190209	108	chr10:103113985,103190102-103190209,103221738	C1	87	92	68.1	34.58	100	65.42	PanAS
DONSON	HsaEX0020707	chr21:34955794-34955972	179	chr21:34956896,34955794-34955972,34954552	C1	86	92	67.35	33.33	95.13	61.8	PanAS
APBB2	HsaEX0005080	chr4:41067593-41067690	98	chr4:41102656,41067593-41067690,41035321	C1	86	92	73.93	29.41	100	70.59	PanAS
ZNF266	HsaEX0073291	chr19:9545474-9545535	62	chr19:9545784,9545474-9545535,9530894	C2	86	92	75.05	44.72	100	55.28	PanAS
DHX33	HsaEX0019595	chr17:5366849-5367009	161	chr17:5371891,5366849-5367009,5365866	S	85	92	76.09	40	100	60	PanAS
C9orf156	HsaEX0011635	chr9:100678446-100678620	175	chr9:100684700,100678446-100678620,100675840	S	85	92	73.35	5.48	100	94.52	PanAS
TRIM65	HsaEX0067175	chr17:73887894-73887959	66	chr17:73888092+73888096,73887894-73887959,73887428	S	84	92	63.01	26.91	100	73.09	PanAS
EFCAB2	HsaEX0021666	chr1:245180544-245180628	85	chr1:245133745,245180544-245180628,245222688	C2	84	92	70.09	31.71	100	68.29	PanAS
SPATS2	HsaEX0061292	chr12:49765011-49765073	63	chr12:49761370,49765011-49765073,49854553	C1	83	92	57.11	16.9	100	83.1	PanAS
FUK	HsaEX0026581	chr16:70503055-70503226	172	chr16:70502871,70503055-70503226,70504217	S	80	92	71.34	23.28	100	76.72	PanAS
PLEKHA1	HsaEX0048218	chr10:124151819-124151884	66	chr10:124134322+124134477,124151819-124151884+124151888,124152697	C1	80	92	61.73	19.44	93.26	73.82	PanAS
RBMXL1	HsaEX0052802	chr1:89453935-89454034	100	chr1:89458268,89453935-89454034,89449749	S	80	92	74.81	38.24	100	61.76	PanAS
C17orf68	HsaEX0009806	chr17:8132460-8132524	65	chr17:8132620+8132653,8132460-8132524,8131947	C2	79	92	67.39	1.89	97.26	95.37	PanAS
C21orf63	HsaEX0010574	chr21:33829905-33830028	124	chr21:33825816,33829905-33830028,33840004	C1	77	92	58.46	0	87.55	87.55	PanAS
SMPDL3A	HsaEX0060515	chr6:123116822-123117035	214	chr6:123110603,123116822-123117035,123117969	S	76	92	66.14	0	92.09	92.09	PanAS
ZNF708	HsaEX0074239	chr19:21493303-21493429	127	chr19:21512012,21493303-21493429,21492143	C1	76	92	62	26.86	100	73.14	PanAS
CSAD	HsaEX0017414	chr12:53565110-53565225	116	chr12:53565662+53565666+53565703,53564961+53565057+53565110-53565225+53565549,53564286	C1	74	92	61.62	8.68	96.04	87.36	PanAS
FAM119A	HsaEX0023847	chr2:208476792-208478167	1376	chr2:208486530,208476792-208478167,208446670+208446884	C1	74	92	44.06	1.41	91.55	90.14	PanAS
HHLA3	HsaEX0029930	chr1:70832616-70832667	52	chr1:70832220,70832616-70832667,70833300	S	74	92	28.73	8.92	100	91.08	PanAS
PTPN18	HsaEX0050985	chr2:131116841-131116882	42	chr2:131116548,131116806+131116841-131116882,131126706	C2	73	92	65.15	5.71	100	94.29	PanAS
ALS2CR8	HsaEX0003890	chr2:203789080-203789138	59	chr2:203782766,203789020+203789080-203789138,203806583	C1	73	92	23.07	4	63.08	59.08	PanAS
TMTC1	HsaEX0066098	chr12:29813737-29813818	82	chr12:29904599,29812813+29813737-29813818,29812916	C1	73	92	76.8	48.53	100	51.47	PanAS
SDCCAG3	HsaEX0056718	chr9:139303451-139303519	69	chr9:139304542,139303451-139303519,139302390	C2	72	92	24.4	2.93	55.12	52.19	PanAS
ZNF142	HsaEX0073061	chr2:219516424-219517023	600	chr2:219520873,219516424-219517023,219515249	S	71	92	65.68	0	94.74	94.74	PanAS
RP4-717I23.3	HsaEX0055303	chr1:93792159-93792219	61	chr1:93802934,93792159-93792219,93791452	C2	66	92	20.36	0	56.58	56.58	PanAS
ZNF827	HsaEX0074416	chr4:146684242-146684274	33	chr4:146684554,146684242-146684274,146682750	C2	66	92	49.22	8.65	97.17	88.52	PanAS
TUBD1	HsaEX0068311	chr17:57951900-57952064	165	chr17:57955464,57951900-57952064,57944110	C1	65	92	70.51	30.41	94.79	64.38	PanAS
GPR116	HsaEX0028257	chr6:46836984-46837103	120	chr6:46839580,46836984-46837103,46836829	S	62	92	19.79	0	37.2	37.2	PanAS
PLSCR4	HsaEX0048508	chr3:145968344-145968424	81	chr3:145968747,145968344-145968424,145939879	C1	61	92	20.74	4.16	50	45.84	PanAS
KIF23	HsaEX0034539	chr15:69733107-69733418	312	chr15:69732826,69733107-69733418,69737129	S	61	92	39.99	0	95.56	95.56	PanAS
POC1A	HsaEX0048784	chr3:52130585-52130724	140	chr3:52156395,52130585-52130724+52130728,52110001	S	61	92	69.69	49.32	100	50.68	PanAS
MDM1	HsaEX0038393	chr12:68719221-68719355	135	chr12:68720437,68719221-68719355,68717020	C1	60	92	67.74	14.53	100	85.47	PanAS
C16orf55	HsaEX0009639	chr16:89724656-89724829	174	chr16:89724243+89724274+89724356+89724617,89724656-89724829,89735694	C1	60	92	58.72	15.79	94.21	78.42	PanAS
WASF1	HsaEX0070842	chr6:110499801-110499945	145	chr6:110500642,110499801-110499945,110481935	C3	60	92	26.14	0	63.11	63.11	PanAS
STEAP3	HsaEX0062391	chr2:119988196-119988610	415	chr2:119981464,119988196-119988610,120003065	C1	59	92	30.23	3.45	62.96	59.51	PanAS
POSTN	HsaEX0049208	chr13:38145506-38145595	90	chr13:38151890,38145506-38145595,38144806	C1	59	92	57.67	0	93.82	93.82	PanAS
XRRA1	HsaEX0071895	chr11:74638436-74638533	98	chr11:74641345,74638436-74638533,74632392	C1	59	92	63.09	14.92	95	80.08	PanAS
PVT1	HsaEX0051349	chr8:129021836-129021964	129	chr8:129001537,129021836-129021964,129082406	C3	59	92	55.18	4.55	98.5	93.95	PanAS
ABCA8	HsaEX0000324	chr17:66945453-66945613	161	chr17:66951360,66945453-66945613,66938175+66938180	C1	52	92	21.31	0	42.98	42.98	PanAS
MFSD7	HsaEX0039037	chr4:679878-679943	66	chr4:680321,679878-679943+680091,678645	C2	52	92	49.25	7.41	100	92.59	PanAS
ARRDC2	HsaEX0006053	chr19:18118399-18119393	995	chr19:18112382,18118399-18119393,18119520	S	51	92	37.58	1.84	91.04	89.2	PanAS
AC009086.1	HsaEX0000984	chr16:29580592-29580649	58	chr16:29624424,29580592-29580649,29577570	S	51	92	39.02	6.36	77.4	71.04	PanAS
SDHA	HsaEX0056754	chr5:1597841-1599384	1544	chr5:1593399,1597841-1599384,1602806	C3	51	92	53.2	8.94	98.59	89.65	PanAS
BZRAP1	HsaEX0008756	chr17:56381699-56381760	62	chr17:56382422,56381699-56381760,56379808	S	50	92	57.93	13.51	95.79	82.28	PanAS
RAGE	HsaEX0051995	chr14:102732160-102732249	90	chr14:102749815,102732160-102732249+102732295,102718328+102718332	C3	50	92	39.77	4.29	86.05	81.76	PanAS
HDAC7	HsaEX0029432	chr12:48196007-48196057	51	chr12:48213550,48196007-48196057,48192755	C1	50	92	70.94	27.87	100	72.13	PanAS
SEC16B	HsaEX0056841	chr1:178002162-178002220	59	chr1:178003840,178002162-178002220,178001630	C1	50	92	66.33	7.49	98.3	90.81	PanAS
ARMCX4	HsaEX0005965	chrX:100743431-100744302	872	chrX:100743086,100743431-100744302,100753132	S	49	92	69.35	30.08	100	69.92	PanAS
RP11-213G2.3	HsaEX0054533	chr9:88430794-88431178	385	chr9:88421048,88430794-88431178,88437795	S	49	92	63.94	33.33	100	66.67	PanAS
CATSPER2	HsaEX0012659	chr15:43939248-43939316	69	chr15:43939492,43939248-43939316,43932694	C2	49	92	39.2	5.33	83.65	78.32	PanAS
SCAND2	HsaEX0056373	chr15:85177055-85177612	558	chr15:85175529+85175569,85177055-85177612,85180578	S	49	92	65.37	11.58	100	88.42	PanAS
C11orf95	HsaEX0009111	chr11:63532340-63532726	387	chr11:63533279,63532340-63532726,63531341	C2	49	92	59.37	7.52	92.73	85.21	PanAS
RP11-534G20.3	HsaEX0054986	chr10:29747203-29747449	247	chr10:29704341,29747203-29747449,29771762	C2	49	92	29.58	3.18	52.99	49.81	PanAS
MYO15B	HsaEX0041031	chr17:73603014-73603084	71	chr17:73602102,73603014-73603084,73606247	C1	49	92	28.74	0	50.67	50.67	PanAS
MELK	HsaEX0038816	chr9:36594667-36594768	102	chr9:36589649,36594625+36594667-36594768,36597219	C1	48	92	73.37	14.33	95.83	81.5	PanAS
GLYCTK	HsaEX0027750	chr3:52324320-52324735	416	chr3:52321892,52324320-52324735,52324976	S	48	92	29.56	6.96	91.66	84.7	PanAS
APTX	HsaEX0005230	chr9:32997241-32997346	106	chr9:33024802+33024998+33025021,32997241-32997346,32989893	S	40	92	28.23	2.13	77.1	74.97	PanAS
TTYH1	HsaEX0068267	chr19:54947008-54947053	46	chr19:54946864,54947008-54947053,54947268+54947271	S	40	92	73.96	43.14	100	56.86	PanAS
CDKL3	HsaEX0014393	chr5:133644265-133644418	154	chr5:133647983,133644265-133644418,133644157	C2	40	92	70.66	23.08	95.68	72.6	PanAS
NRXN2	HsaEX0043862	chr11:64393935-64394024	90	chr11:64397874,64393935-64394024,64390550	S	40	92	50.66	5.49	95.12	89.63	PanAS
RP4-717I23.3	HsaEX0055294	chr1:93804746-93804831	86	chr1:93804914+93805033,93804713+93804746-93804831+93804834,93791452	C1	40	92	72.61	29.73	95.13	65.4	PanAS
CAPS2	HsaEX0012412	chr12:75784102-75784161	60	chr12:75784618,75780131+75784102-75784161,75765262	C2	40	92	23.2	3.08	43.5	40.42	PanAS
SP110	HsaEX0061105	chr2:231036412-231036483	72	chr2:231036782,231036195+231036412-231036483,231033953	C2	39	92	44.94	5.08	93.75	88.67	PanAS
EVC	HsaEX0023333	chr4:5829109-5829229	121	chr4:5825547,5829109-5829229,5829806	C3	39	92	26.23	6.23	48.39	42.16	PanAS
C22orf39	HsaEX0010622	chr22:19386603-19386715	113	chr22:19392986,19386603-19386715,19385610	C1	39	92	31.17	1.49	81.82	80.33	PanAS
ARSJ	HsaEX0006095	chr4:114827852-114827901	50	chr4:114899593,114827821+114827852-114827901,114824831	C1	38	92	22.41	4.85	64.66	59.81	PanAS
CTC-358I24.1	HsaEX0017703	chr5:87705890-87706011	122	chr5:87566402,87705890-87706011,87732090	S	38	92	61.43	27.4	94.84	67.44	PanAS
ZNF43	HsaEX0073644	chr19:22033740-22033964	225	chr19:22034707,22033740-22033964,22028308	C1	38	92	22.8	4.68	59.16	54.48	PanAS
SKA3	HsaEX0058473	chr13:21746759-21746820	62	chr13:21750487+21750514,21746759-21746820,21746643	C1	37	92	81.04	37.21	95.24	58.03	PanAS
WDR52	HsaEX0071194	chr3:113127953-113128169	217	chr3:113135372,113127953-113128169,113125888	S	37	92	68.67	34.01	100	65.99	PanAS
ZFP112	HsaEX0072649	chr19:44847406-44847454	49	chr19:44860778,44847406-44847454,44844694	S	37	92	25.2	0	58.56	58.56	PanAS
RAP2C	HsaEX0052243	chrX:131351944-131352040	97	chrX:131353398,131351944-131352040,131351395+131351834	C1	36	92	50.72	1.96	83	81.04	PanAS
PLA2G5	HsaEX0047956	chr1:20416282-20416388	107	chr1:20412720,20416225+20416282-20416388,20417061	S	36	92	72.33	47.22	100	52.78	PanAS
CEACAM19	HsaEX0014471	chr19:45176984-45177117	134	chr19:45176236,45176984-45177117,45179543	S	36	92	37.15	0	65.22	65.22	PanAS
RP11-86H7.1	HsaEX0055175	chr1:95170995-95171113	119	chr1:95197814,95170995-95171113,95145163	C2	36	92	30.74	3.03	67.12	64.09	PanAS
NQO2	HsaEX0043651	chr6:3003903-3004023	121	chr6:3002520,3003903-3004023,3004729	C3	36	92	62.73	12.46	92.07	79.61	PanAS
C4orf36	HsaEX0011045	chr4:87811201-87811291	91	chr4:87812609,87811201-87811291+87811311,87809424+87809428	S	26	92	35.23	6.15	90.48	84.33	PanAS
PABPC1L	HsaEX0045155	chr20:43581284-43581345	62	chr20:43566832,43581284-43581345,43586978	C2	26	92	24.2	5	40.91	35.91	PanAS
C18orf45	HsaEX0009903	chr18:20951386-20951434	49	chr18:20953676,20951386-20951434,20950225	C2	26	92	65.94	36.53	100	63.47	PanAS
SYT14	HsaEX0063263	chr1:210126464-210126604	141	chr1:210126101,210126400+210126464-210126604,210186978	C1	26	92	38.73	8.26	65.78	57.52	PanAS
GPRC5C	HsaEX0028455	chr17:72444962-72445054	93	chr17:72443137,72444962-72445054,72445474	S	26	92	80.21	41.26	91.49	50.23	PanAS
ATP6AP1L	HsaEX0006951	chr5:81599847-81599924	78	chr5:81599651,81599847-81599924,81600434	S	26	92	56.19	11.63	100	88.37	PanAS
RP11-30E17.3	HsaEX0054616	chr13:79989397-79989499	103	chr13:79980437+79980612,79989246+79989397-79989499,79991970	C3	26	92	42.72	5.56	86.05	80.49	PanAS
RP11-510H23.1	HsaEX0054952	chr6:125266445-125266585	141	chr6:125269077,125266445-125266585,125262670	S	26	92	26.09	0	57.03	57.03	PanAS
CTD-2230D16.1	HsaEX0017751	chr3:64959487-64959579	93	chr3:64852932,64959487-64959579,64994620	C2	26	92	24.3	5.71	76.47	70.76	PanAS
RSPH9	HsaEX0055816	chr6:43634161-43634257	97	chr6:43624460,43634161-43634257,43638526	S	25	92	19.04	9.52	38.46	28.94	PanAS
C6orf170	HsaEX0011298	chr6:121526221-121526309	89	chr6:121544382,121526221-121526309,121491673	C1	25	92	77.69	39.46	91.48	52.02	PanAS
[truncated: 8,554 more rows]

## Sheet: Mouse
GENE	EVENT	COORD	LENGTH	FullCO	COMPLEX	N_samples	PercAS	AvPSI	MIN	MAX	RANGE	TYPE
Usp32	MmuEX0050936	chr11:84800771-84800863	93	chr11:84801836,84800771-84800863,84800085	S	125	2	98.58	0	100	100	SwitchAS
Ccdc132	MmuEX0009537	chr6:3512268-3512358	91	chr6:3505466,3512268-3512358,3515516	S	116	2	97.75	5.66	100	94.34	SwitchAS
Qtrt1	MmuEX0038184	chr9:21223883-21223992	110	chr9:21223810,21223883-21223992,21224069	S	129	5	96.22	0.61	100	99.39	SwitchAS
Supt5h	MmuEX0045762	chr7:29101302-29101460	159	chr7:29101803,29101302-29101460,29101196	S	139	9	95.2	11.72	100	88.28	SwitchAS
Impdh1	MmuEX0024098	chr6:29151888-29151904	17	chr6:29152447,29151888-29151904,29151219	S	126	3	6.53	0	97.2	97.2	SwitchAS
Fam162a	MmuEX0018044	chr16:36046465-36046573	109	chr16:36049928,36046465-36046573,36044177	S	132	1	96.83	6.12	100	93.88	SwitchAS
BC023814	MmuEX0007379	chr3:87728869-87729353	485	chr3:87730456+87730653,87728814+87728864+87728869-87729353,87728450	S	119	0	98.49	8.29	100	91.71	SwitchAS
Mef2c	MmuEX0028564	chr13:83794203-83794226	24	chr13:83792591,83794203-83794226,83795112	S	89	8	22.88	0	99.74	99.74	SwitchAS
Gtpbp3	MmuEX0022167	chr8:74012970-74013217	248	chr8:74012739,74012970-74013217,74013324+74013327	S	115	1	98.19	2.38	100	97.62	SwitchAS
Fbxw9	MmuEX0018975	chr8:87585845-87585984	140	chr8:87584435,87585845-87585984,87586071	S	119	5	97.07	0	100	100	SwitchAS
Hipk1	MmuEX0022923	chr3:103560547-103560673	127	chr3:103562458,103560547-103560673,103558245	S	132	5	3.16	0	89.22	89.22	SwitchAS
Ap1b1	MmuEX0005390	chr11:4933245-4933265	21	chr11:4932622,4933245-4933265,4933690	S	133	18	17.38	0	96.45	96.45	SwitchAS
Fsd1	MmuEX0019696	chr17:56135844-56135932	89	chr17:56135746,56135844-56135932,56136065	S	60	12	95.6	10.64	100	89.36	SwitchAS
Dhdds	MmuEX0014474	chr4:133552521-133552646	126	chr4:133552737,133552521-133552646+133552650,133550219+133550244	S	133	1	2.51	0	100	100	SwitchAS
Chfr	MmuEX0011276	chr5:110573791-110574006	216	chr5:110573669,110573791-110574006,110575489	S	130	12	94.65	2.56	100	97.44	SwitchAS
Prrt1	MmuEX0037428	chr17:34767578-34768116	539	chr17:34766649,34767578-34768116,34768715	S	28	18	88.6	5.88	100	94.12	SwitchAS
Pls3	MmuEX0035876	chrX:73045056-73045082	27	chrX:73045841,73045056-73045082,73044829	S	121	19	13	0	88.53	88.53	SwitchAS
5033414D02Rik	MmuEX0001939	chr19:29425534-29425664	131	chr19:29432807,29425534-29425664,29424959	S	127	8	94.99	0	100	100	SwitchAS
Cacnb4	MmuEX0008844	chr2:52320130-52320188	59	chr2:52321118,52320130-52320188,52311229	S	32	16	88.61	0	100	100	SwitchAS
Cacnb4	MmuEX0008845	chr2:52321414-52321433	20	chr2:52322764,52321414-52321433,52321198	S	27	15	88.14	0	100	100	SwitchAS
Mapt	MmuEX0027898	chr11:104169195-104169248	54	chr11:104168072,104169195-104169248,104171583	S	75	16	6.34	0	93.55	93.55	SwitchAS
Utrn	MmuEX0051188	chr10:12135249-12135287	39	chr10:12141395,12135249-12135287,12135044	S	121	9	93.23	9.79	100	90.21	SwitchAS
Cep290	MmuEX0010970	chr10:99958275-99958295	21	chr10:99957588,99958275-99958295,99958457	S	61	5	7.2	0	92.51	92.51	SwitchAS
Enpp3	MmuEX0016900	chr10:24540378-24540438	61	chr10:24544609,24540378-24540438,24537770	S	62	13	93.15	0	100	100	SwitchAS
Mybpc1	MmuEX0030276	chr10:88029253-88029309	57	chr10:88031343,88029253-88029309,88023135	S	32	9	93.69	6.79	100	93.21	SwitchAS
Hnrnph3	MmuEX0023114	chr10:62479970-62480085	116	chr10:62480272,62479970-62480085,62479290	S	136	4	96.54	8.43	100	91.57	SwitchAS
Srgap1	MmuEX0044899	chr10:121243944-121244087	144	chr10:121244917,121243944-121244087,121242096	S	65	2	2.84	0	92.06	92.06	SwitchAS
Ggnbp2	MmuEX0020360	chr11:84667757-84667882	126	chr11:84671942,84667757-84667882,84667669	S	130	9	8.42	0	92.72	92.72	SwitchAS
Rnaseh1	MmuEX0039963	chr12:29343036-29343160	125	chr12:29342582,29343036-29343160,29343858	S	134	5	97.42	1.29	100	98.71	SwitchAS
Adap2	MmuEX0003920	chr11:79987590-79987652	63	chr11:79984263,79987590-79987652,79989558	S	58	3	95.42	0	100	100	SwitchAS
Abcc3	MmuEX0003108	chr11:94225666-94225753	88	chr11:94226087,94225666-94225753,94225422	S	43	7	96.09	8.57	100	91.43	SwitchAS
1500010J02Rik	MmuEX0000279	chr11:68836211-68836422	212	chr11:68836116,68836211-68836422,68837664	S	110	3	97.15	5.26	100	94.74	SwitchAS
Ttc8	MmuEX0049605	chr12:100175330-100175359	30	chr12:100158993+100159159,100175330-100175359,100180428	S	105	6	5.26	0	93.18	93.18	SwitchAS
Nin	MmuEX0031718	chr12:71123268-71123328	61	chr12:71126367+71126394,71123268-71123328,71122018	S	116	18	12	0	96.85	96.85	SwitchAS
Mrs2	MmuEX0029765	chr13:25086594-25086711	118	chr13:25087214,25086594-25086711,25085652	S	136	0	98.63	0	100	100	SwitchAS
Ckmt2	MmuEX0011492	chr13:91999464-91999549	86	chr13:92000743,91999464-91999549,91998923	S	37	3	85.3	0	100	100	SwitchAS
Ppp3cb	MmuEX0036794	chr14:21330696-21330722	27	chr14:21334745,21330696-21330722,21328719+21328722	S	131	14	4.2	0	81.61	81.61	SwitchAS
Btd	MmuEX0008403	chr14:32475256-32475511	256	chr14:32454321,32475256-32475511,32479068	S	104	13	93.22	0	100	100	SwitchAS
Spata13	MmuEX0044535	chr14:61325551-61325886	336	chr14:61311385,61325551-61325886+61325916,61328262	S	66	17	92.64	13.79	100	86.21	SwitchAS
Pdzd2	MmuEX0034361	chr15:12645897-12645992	96	chr15:12669372,12645897-12645992,12522665	S	27	15	89.5	5.41	100	94.59	SwitchAS
Stk3	MmuEX0045422	chr15:35044693-35044713	21	chr15:35045320,35044693-35044713,35044412	S	90	7	9.97	0	97.14	97.14	SwitchAS
Srl	MmuEX0044921	chr16:4496405-4497715	1311	chr16:4541680,4496405-4497715,4493877+4493880	S	60	15	12.35	0	98.25	98.25	SwitchAS
Tmem44	MmuEX0047975	chr16:30540825-30540995	171	chr16:30543488,30540825-30540995,30539624	S	72	0	97.94	0	100	100	SwitchAS
Synj1	MmuEX0045982	chr16:90971809-90971832	24	chr16:90974155,90971809-90971832,90969619	S	101	11	25.45	0	98.63	98.63	SwitchAS
Lmbr1l	MmuEX0026589	chr15:98739107-98739190	84	chr15:98739280,98739107-98739190,98739027	S	120	2	97.31	0	100	100	SwitchAS
Sfi1	MmuEX0041915	chr11:3036628-3036702	75	chr11:3036949,3036628-3036702,3036020	S	116	3	97.73	0	100	100	SwitchAS
Msh2	MmuEX0029787	chr17:88095835-88095944	110	chr17:88088481,88095835-88095944,88106522	S	116	1	98.92	13.51	100	86.49	SwitchAS
Spsb3	MmuEX0044809	chr17:25027513-25027700	188	chr17:25027405,25027497+25027513-25027700,25027778	S	131	5	95.81	1.23	100	98.77	SwitchAS
Slc14a2	MmuEX0042620	chr18:78382478-78382625	148	chr18:78388830,78382478-78382625,78381419	S	23	17	92.18	1.55	100	98.45	SwitchAS
Zfpl1	MmuEX0053745	chr19:6082181-6082327	147	chr19:6082399,6082181-6082327,6081964	S	133	1	98.67	14.81	100	85.19	SwitchAS
Rad9	MmuEX0038563	chr19:4197671-4197780	110	chr19:4200272,4197671-4197780,4197586	S	112	4	96.47	15.59	100	84.41	SwitchAS
Coro1b	MmuEX0012472	chr19:4153227-4153490	264	chr19:4152579,4153227-4153490,4153597	S	135	1	97.85	2.35	100	97.65	SwitchAS
Lrp5	MmuEX0026894	chr19:3651843-3651955	113	chr19:3652133,3651843-3651955,3649600	S	116	3	2.49	0	84.62	84.62	SwitchAS
Ovol1	MmuEX0033342	chr19:5553554-5553771	218	chr19:5560201,5553554-5553771,5551674	S	45	7	94.32	0	100	100	SwitchAS
Dnajc4	MmuEX0015217	chr19:7063913-7064046	134	chr19:7064171+7064298,7063913-7064046+7064074+7064077,7062761+7062765	S	132	17	91.41	0	100	100	SwitchAS
Ankrd2	MmuEX0005039	chr19:42118243-42118341	99	chr19:42116957,42118243-42118341,42118533	S	22	14	90.88	3.23	100	96.77	SwitchAS
Bbs4	MmuEX0007735	chr9:59188894-59189005	112	chr9:59190295,59188894-59189005,59187690	S	85	1	98.14	0	100	100	SwitchAS
Baiap2	MmuEX0007649	chr11:119858803-119859004	202	chr11:119858404,119858803-119859004,119859948	S	131	4	96.76	0	100	100	SwitchAS
Gli1	MmuEX0020513	chr10:126775719-126775837	119	chr10:126778261,126775719-126775837,126775602	S	42	0	3.21	0	98.71	98.71	SwitchAS
Tmc6	MmuEX0047578	chr11:117632005-117632100	96	chr11:117633987,117632005-117632100+117632116,117631858	S	110	1	98.47	0	100	100	SwitchAS
Dhtkd1	MmuEX0014527	chr2:5832860-5833010	151	chr2:5834558,5832860-5833010,5831454	S	65	9	95.09	0	100	100	SwitchAS
Myo5b	MmuEX0030537	chr18:74888525-74888602	78	chr18:74883511,74888525-74888602,74891299	S	75	19	10.57	0	89.93	89.93	SwitchAS
Mff	MmuEX0028783	chr1:82724642-82724813	172	chr1:82723911,82724642-82724813,82725791	S	134	14	7.92	0	80.13	80.13	SwitchAS
Ppfia4	MmuEX0036521	chr1:136208106-136208132	27	chr1:136208634,136208106-136208132,136206328	S	42	12	52.08	0	100	100	SwitchAS
Mark1	MmuEX0027946	chr1:186724688-186724732	45	chr1:186729282,186724688-186724732,186722757	S	89	8	96.06	1.37	100	98.63	SwitchAS
Pkn3	MmuEX0035439	chr2:29945588-29945695	108	chr2:29945501,29945588-29945695,29945851	S	91	2	97.87	0.95	100	99.05	SwitchAS
Ttf1	MmuEX0049610	chr2:28930094-28930328	235	chr2:28929539,28930094-28930328,28934909	S	104	8	96	4.35	100	95.65	SwitchAS
Wdr5	MmuEX0051937	chr2:27386472-27386519	48	chr2:27383840,27386472-27386519,27387159	S	135	1	1.43	0	88.1	88.1	SwitchAS
Egfl7	MmuEX0016420	chr2:26445900-26446015	116	chr2:26444966,26445900-26446015,26446097+26446177	S	114	4	96.37	0	100	100	SwitchAS
Anapc2	MmuEX0004853	chr2:25133844-25134025	182	chr2:25133273,25133844-25134025,25134692	S	137	1	98.02	0	100	100	SwitchAS
Anapc2	MmuEX0004854	chr2:25135647-25135722	76	chr2:25134833,25135647-25135722,25135803	S	132	1	97.98	3.33	100	96.67	SwitchAS
Lrp2	MmuEX0026877	chr2:69268320-69268421	102	chr2:69269132,69268320-69268421,69266778	S	39	0	96.96	0	100	100	SwitchAS
Pex16	MmuEX0034508	chr2:92217587-92217720	134	chr2:92216857+92216860,92217587-92217720,92217848	S	133	11	95.88	15.79	100	84.21	SwitchAS
Tyro3	MmuEX0050036	chr2:119628015-119628115	101	chr2:119627467,119628015-119628115,119628976	S	100	0	98.85	6.29	100	93.71	SwitchAS
4930402H24Rik	MmuEX0001454	chr2:130565107-130565205	99	chr2:130566137,130565107-130565205,130564834+130564852	S	111	3	97.81	7.69	100	92.31	SwitchAS
Rrbp1	MmuEX0040571	chr2:143776164-143776259	96	chr2:143777928,143776164-143776259,143775491	S	137	10	94.86	11.9	100	88.1	SwitchAS
Napb	MmuEX0030873	chr2:148532895-148532941	47	chr2:148535053,148532895-148532941,148532759	S	39	10	66.58	0	100	100	SwitchAS
Ptpn1	MmuEX0037776	chr2:167799560-167799769	210	chr2:167797330,167799560-167799769,167800229	S	133	1	98.67	1.71	100	98.29	SwitchAS
Acss2	MmuEX0003608	chr2:155382069-155382239	171	chr2:155381727,155382069-155382239,155382514	S	118	8	96.3	0	100	100	SwitchAS
Epb4.1l1	MmuEX0016987	chr2:156337521-156337556	36	chr2:156336617,156337521-156337556,156339764	S	119	18	23.65	0	98.47	98.47	SwitchAS
Col11a1	MmuEX0012118	chr3:113841089-113841104	16	chr3:113836107,113841089-113841104,113841318	S	31	10	10.53	0	100	100	SwitchAS
Acp6	MmuEX0003541	chr3:96975565-96975665	101	chr3:96972496,96975565-96975665,96977726	S	129	9	95.23	0	100	100	SwitchAS
Manba	MmuEX0027650	chr3:135175310-135175411	102	chr3:135174937,135175310-135175411,135180867	S	100	15	6.74	0	97.77	97.77	SwitchAS
Pdpn	MmuEX0034308	chr4:142860426-142860464	39	chr4:142863803,142860426-142860464,142859202	S	104	1	96.36	6.22	100	93.78	SwitchAS
Macf1	MmuEX0027472	chr4:123074337-123074663	327	chr4:123074991,123074337-123074663,123073240	S	120	18	89.56	15.65	100	84.35	SwitchAS
Map3k6	MmuEX0027744	chr4:132798968-132798991	24	chr4:132798872,132798968-132798991,132799226	S	28	14	86.98	8.93	100	91.07	SwitchAS
Ptpru	MmuEX0037997	chr4:131350876-131350905	30	chr4:131353768,131350876-131350905,131349590	S	79	15	25.8	0	100	100	SwitchAS
Mfn2	MmuEX0028801	chr4:147277037-147277102	66	chr4:147277464,147277037-147277102+147277119,147272751	S	133	14	9.63	0	99.45	99.45	SwitchAS
Plch2	MmuEX0035629	chr4:154359475-154359501	27	chr4:154360828,154359475-154359501,154359074	S	39	8	25.79	0	99.52	99.52	SwitchAS
Prom1	MmuEX0037291	chr5:44403738-44403755	18	chr5:44404115,44403738-44403755,44402487	S	89	1	6.34	0	96.04	96.04	SwitchAS
Tmem116	MmuEX0047683	chr5:121941085-121941223	139	chr5:121939340,121941085-121941223,121943640	S	54	0	97.49	0	100	100	SwitchAS
P2rx4	MmuEX0033384	chr5:123177408-123177473	66	chr5:123177300,123177408-123177473,123177754	S	125	10	94.22	0	100	100	SwitchAS
Ung	MmuEX0050666	chr5:114581328-114581522	195	chr5:114580634,114581328-114581522,114582190	S	51	2	97.6	0	100	100	SwitchAS
Cyp3a13	MmuEX0013370	chr5:138356802-138356901	100	chr5:138358746,138356802-138356901,138353180	S	20	5	92.66	9.8	100	90.2	SwitchAS
Gfpt1	MmuEX0020311	chr6:87010779-87010826	48	chr6:87010594,87010779-87010826,87013799	S	131	8	3.92	0	100	100	SwitchAS
Abtb1	MmuEX0003336	chr6:88786519-88786719	201	chr6:88788112,88786519-88786719,88786446	S	129	1	97.31	1.54	100	98.46	SwitchAS
Lag3	MmuEX0026026	chr6:124855274-124855510	237	chr6:124858384+124858395,124855274-124855510,124854986	S	52	0	97.38	0	100	100	SwitchAS
Abcc9	MmuEX0003157	chr6:142542487-142542662	176	chr6:142543229,142542487-142542662,142539023	S	75	19	13.24	0	93.09	93.09	SwitchAS
Gas2	MmuEX0020108	chr7:59151677-59151888	212	chr7:59143446,59151677-59151888,59152621	S	90	9	3.75	0	100	100	SwitchAS
Cib1	MmuEX0011418	chr7:87373048-87373166	119	chr7:87373284,87373048-87373166,87372968	S	136	1	98.73	11.29	100	88.71	SwitchAS
Ryr1	MmuEX0040851	chr7:29789802-29789866	65	chr7:29790514,29789802-29789866,29789544	S	75	13	94.31	0	100	100	SwitchAS
Ryr1	MmuEX0040853	chr7:29850595-29850644	50	chr7:29851514,29850595-29850644,29849896	S	36	8	91.53	0	100	100	SwitchAS
Atp2a1	MmuEX0006810	chr7:133590059-133590100	42	chr7:133590385,133590059-133590100,133589640	S	42	17	85.84	0	100	100	SwitchAS
Dock11	MmuEX0015392	chrX:33615912-33615929	18	chrX:33609981,33615912-33615929,33616094	S	99	16	13.4	0	100	100	SwitchAS
Gripap1	MmuEX0021929	chrX:7396293-7396447	155	chrX:7395515,7396293-7396447,7397128	S	127	9	95.69	1.59	100	98.41	SwitchAS
Fundc2	MmuEX0019755	chrX:72636123-72636198	76	chrX:72632591,72636123-72636198,72636979	S	127	0	98.4	0	100	100	SwitchAS
Atp11a	MmuEX0006735	chr8:12851633-12851656	24	chr8:12851172,12851633-12851656,12856934	S	124	13	6.97	0	94.45	94.45	SwitchAS
Ank1	MmuEX0004884	chr8:24220819-24220842	24	chr8:24220201,24220819-24220842,24221832	S	32	16	67.7	0	100	100	SwitchAS
Odz3	MmuEX0032996	chr8:49372487-49372507	21	chr8:49373145,49372487-49372507,49364544	S	67	18	24.69	0	97.9	97.9	SwitchAS
Fam125a	MmuEX0017901	chr8:74070872-74070933	62	chr8:74069755,74070872-74070933,74071477	S	135	1	96.92	1.54	100	98.46	SwitchAS
6430548M08Rik	MmuEX0002176	chr8:122681368-122681397	30	chr8:122680274,122681368-122681397,122683859	S	102	16	23.57	0	98.97	98.97	SwitchAS
Mau2	MmuEX0028049	chr8:72544319-72544409	91	chr8:72546035,72544319-72544409,72543773	S	135	0	98.8	0	100	100	SwitchAS
Bmper	MmuEX0008066	chr9:23170636-23170735	100	chr9:23105466,23170636-23170735,23178277	S	49	4	95.54	3.57	100	96.43	SwitchAS
Tagln	MmuEX0046230	chr9:45738916-45739018	103	chr9:45739383,45738916-45739018,45738598	S	110	0	98.2	0	100	100	SwitchAS
Slc37a2	MmuEX0043196	chr9:37040638-37040694	57	chr9:37040895,37040638-37040694,37039241	S	79	16	14.72	0	98.86	98.86	SwitchAS
Cmtm6	MmuEX0011850	chr9:114646301-114646477	177	chr9:114640332+114640491,114646301-114646477,114649177	S	128	2	96.52	5.26	100	94.74	SwitchAS
Dync1li1	MmuEX0015959	chr9:114628976-114629020	45	chr9:114627040,114628976-114629020,114629667	S	131	1	97.9	0	100	100	SwitchAS
Mtap4	MmuEX0029910	chr9:109939792-109942971	3180	chr9:109939359,109939792-109942971,109965521	S	139	13	5.62	0	96.33	96.33	SwitchAS
2310001A20Rik	MmuEX0000816	chr2:150411499-150411691	193	chr2:150412117,150411499-150411691,150409924	S	131	1	97.91	8.33	100	91.67	SwitchAS
Mgll	MmuEX0028919	chr6:88763874-88763957	84	chr6:88759440,88763874-88763957,88768568	S	114	12	6.16	0	82.15	82.15	SwitchAS
Prss35	MmuEX0037441	chr9:86637029-86637111	83	chr9:86636607,86636886+86637029-86637111,86648330	S	38	16	11.18	0	88	88	SwitchAS
Mapkbp1	MmuEX0027890	chr2:119839037-119839054	18	chr2:119838830,119839037-119839054,119839355	S	88	15	13.32	0	93.06	93.06	SwitchAS
Fancd2	MmuEX0018559	chr6:113543224-113543325	102	chr6:113541299,113543224-113543325,113545882	S	76	0	98.23	0	100	100	SwitchAS
Rpap1	MmuEX0040330	chr2:119595623-119595818	196	chr2:119596056,119595623-119595818,119595468	S	121	3	97.52	16.67	100	83.33	SwitchAS
Fstl5	MmuEX0019713	chr3:76424402-76424428	27	chr3:76397499,76424402-76424428,76432835	S	24	12	90.32	0	100	100	SwitchAS
Ctnnd1	MmuEX0013078	chr2:84443345-84443431	87	chr2:84443806,84443345-84443431,84443057+84443060	S	137	18	10.52	0	95.22	95.22	SwitchAS
Nipsnap1	MmuEX0031762	chr11:4788883-4788953	71	chr11:4784119,4788883-4788953,4789100	S	117	15	94.23	5.45	100	94.55	SwitchAS
Fbxo16	MmuEX0018833	chr14:65938942-65938977	36	chr14:65922039,65938942-65938977,65940071	S	44	14	13.16	0	92.93	92.93	SwitchAS
A230046K03Rik	MmuEX0002456	chr10:83044002-83044136	135	chr10:83043106,83044002-83044136,83046000	S	113	4	97.45	0	100	100	SwitchAS
Daam1	MmuEX0013683	chr12:73059734-73059760	27	chr12:73053546,73059734-73059760,73060793	S	118	18	19.99	0	98.28	98.28	SwitchAS
Dbn1	MmuEX0013791	chr13:55577997-55578134	138	chr13:55578912,55577997-55578134,55577677	S	117	14	10.59	0	96.62	96.62	SwitchAS
Dgkh	MmuEX0014422	chr14:78981286-78981378	93	chr14:78984182,78981286-78981378,78978615	S	71	7	93.65	11.2	100	88.8	SwitchAS
Mbd3	MmuEX0028069	chr10:79855840-79856021	182	chr10:79856638,79855840-79856021+79856025,79855763	S	133	1	98.55	1.54	100	98.46	SwitchAS
Gm98	MmuEX0021243	chr19:10289764-10289844	81	chr19:10290232,10289764-10289844,10289592+10289595	S	68	9	19.46	0	100	100	SwitchAS
Ng23	MmuEX0031667	chr17:35163283-35163402	120	chr17:35163639,35163283-35163402,35163092	S	40	5	92.16	0	100	100	SwitchAS
Ubac1	MmuEX0050089	chr2:25864381-25864489	109	chr2:25864681,25864381-25864489,25863339+25863473	S	125	1	98.32	1.68	100	98.32	SwitchAS
Exoc1	MmuEX0017543	chr5:76969772-76969792	21	chr5:76966882,76969772-76969792,76971076	S	113	13	25.75	0	100	100	SwitchAS
36951	MmuEX0027909	chr8:68910708-68911460	753	chr8:68910418,68910708-68911460,68942715	S	50	10	13.19	0	94.6	94.6	SwitchAS
Ppfibp2	MmuEX0036540	chr7:114872230-114872262	33	chr7:114871299,114872230-114872262,114872653	S	90	18	11.89	0	93.09	93.09	SwitchAS
Sbf1	MmuEX0041056	chr15:89137603-89137626	24	chr15:89137924,89137603-89137626,89137366	S	120	15	6.3	0	83.24	83.24	SwitchAS
Arhgap21	MmuEX0005821	chr2:20775585-20775605	21	chr2:20776562,20775585-20775605+20775859,20774696	S	123	15	8.21	0	87.76	87.76	SwitchAS
Cc2d1a	MmuEX0009410	chr8:86657663-86657789	127	chr8:86657876,86657663-86657789,86657439	S	131	8	96.53	0	100	100	SwitchAS
Ttll7	MmuEX0049704	chr3:146604783-146604857	75	chr3:146603141,146604783-146604857,146606970	S	78	19	8.89	0	89.51	89.51	SwitchAS
Topors	MmuEX0048529	chr4:40215337-40215534	198	chr4:40216707,40215337-40215534,40210114	S	109	6	96.6	1.75	100	98.25	SwitchAS
Tulp1	MmuEX0049927	chr17:28493284-28493395	112	chr17:28495394+28495495,28493284-28493395,28493207	S	23	13	93.92	15.79	100	84.21	SwitchAS
Samd4b	MmuEX0040952	chr7:29188639-29188762	124	chr7:29188883,29188639-29188762,29186926	S	128	0	98.61	0	100	100	SwitchAS
Fam113a	MmuEX0017825	chr2:130248202-130248440	239	chr2:130248549,130248202-130248440,130248111	S	99	11	94.37	1.84	100	98.16	SwitchAS
Atp6v0a2	MmuEX0006892	chr5:125198257-125198376	120	chr5:125196886,125198257-125198376,125198810	S	130	3	97.19	2.22	100	97.78	SwitchAS
Ncapd2	MmuEX0031056	chr6:125136772-125136830	59	chr6:125137095,125136772-125136830,125136279+125136299	S	108	1	98.38	16.67	100	83.33	SwitchAS
BC028528	MmuEX0007423	chr3:95688893-95688991	99	chr3:95692064,95688893-95688991+95688994,95688160	S	100	13	94.52	3.35	100	96.65	SwitchAS
Atp6v0a4	MmuEX0006895	chr6:38010970-38011088	119	chr6:38017737,38010970-38011088,38008941	S	28	0	95.58	0	100	100	SwitchAS
Rtel1	MmuEX0040685	chr2:181090629-181090664	36	chr2:181090517,181090603+181090629-181090664+181090784,181090863	S	80	5	96.63	17.83	100	82.17	SwitchAS
Prpf18	MmuEX0037314	chr2:4569143-4569169	27	chr2:4569287,4569143-4569169,4566719	S	129	19	10.02	0	91.08	91.08	SwitchAS
Cc2d2a	MmuEX0009427	chr5:44119510-44119530	21	chr5:44117611,44119510-44119530,44121096	S	87	16	7.85	0	90.4	90.4	SwitchAS
Cacna2d1	MmuEX0008812	chr5:15828357-15828413	57	chr5:15825976,15828357-15828413,15832130+15832145	S	71	14	12.58	0	100	100	SwitchAS
Daam2	MmuEX0013691	chr17:49613434-49613577	144	chr17:49615773,49613434-49613577,49612717	S	61	10	8.59	0	97.74	97.74	SwitchAS
Wdr7	MmuEX0052019	chr18:63951450-63951545	96	chr18:63939611,63951450-63951545,63953879	S	104	18	18	0	96.3	96.3	SwitchAS
9030409G11Rik	MmuEX0002279	chr4:141699209-141699259	51	chr4:141702933+141702938,141699209-141699259,141697711	S	104	2	98.2	13.21	100	86.79	SwitchAS
Madd	MmuEX0027512	chr2:90995170-90995232	63	chr2:90995703,90995170-90995232,90994922	S	106	11	27.1	0	100	100	SwitchAS
Camta2	MmuEX0009028	chr11:70484393-70484413	21	chr11:70484510,70484393-70484413,70484238	S	123	13	18.65	0	97.73	97.73	SwitchAS
Dmxl2	MmuEX0014930	chr9:54227582-54227644	63	chr9:54228715,54227582-54227644,54226810	S	89	15	68.88	0	100	100	SwitchAS
Fam38b	MmuEX0018290	chr18:63246232-63246408	177	chr18:63250534,63246232-63246408,63245943	S	29	7	94.1	18.33	100	81.67	SwitchAS
Fam38b	MmuEX0018291	chr18:63258707-63258748	42	chr18:63261675,63258707-63258748,63252671	S	31	10	6.21	0	81.58	81.58	SwitchAS
Ccdc64	MmuEX0009861	chr5:116101165-116101273	109	chr5:116101828,116101165-116101273,116099578	S	113	18	18.69	0	97.02	97.02	SwitchAS
Prima1	MmuEX0037068	chr12:104437993-104438124	132	chr12:104440859,104437954+104437993-104438124,104435561	S	35	14	12.36	0	91.95	91.95	SwitchAS
Pbrm1	MmuEX0033842	chr14:31902651-31902808	158	chr14:31900847,31902651-31902808,31918533	S	126	1	98.73	16.36	100	83.64	SwitchAS
Dmtf1	MmuEX0014900	chr5:9132456-9132613	158	chr5:9136066,9132456-9132613,9131308	S	121	14	94.06	7.66	100	92.34	SwitchAS
Safb2	MmuEX0040926	chr17:56713625-56713725	101	chr17:56714326,56713625-56713725,56710972	S	128	7	95.39	14.29	100	85.71	SwitchAS
Sipa1l1	MmuEX0042425	chr12:83463930-83464118	189	chr12:83458350,83463930-83464118,83473355	S	125	0	98.81	6.17	100	93.83	SwitchAS
Egflam	MmuEX0016428	chr15:7174645-7174668	24	chr15:7181588,7174645-7174668,7172826	S	65	3	10.18	0	99.76	99.76	SwitchAS
Trp53bp1	MmuEX0049080	chr2:121029133-121029188	56	chr2:121030069,121029129+121029133-121029188,121028488+121028494	S	134	1	2.24	0	96.47	96.47	SwitchAS
9030625A04Rik	MmuEX0002305	chr14:77435619-77435797	179	chr14:77436304,77435619-77435797,77435212	S	62	13	91.08	0	100	100	SwitchAS
9930104L06Rik	MmuEX0002416	chr4:124615684-124615961	278	chr4:124614577,124615684-124615961+124616098,124617610	S	108	0	98.68	9.09	100	90.91	SwitchAS
C2cd3	MmuEX0008537	chr7:107584268-107584606	339	chr7:107581083,107584268-107584606,107588683	S	112	4	97.23	18.81	100	81.19	SwitchAS
Odz4	MmuEX0033017	chr7:104003227-104003247	21	chr7:104001092,104003227-104003247,104011960	S	58	10	21.89	0	97.86	97.86	SwitchAS
Phldb1	MmuEX0034863	chr9:44496507-44496539	33	chr9:44496700,44496507-44496539,44495781	S	123	11	4.87	0	81.46	81.46	SwitchAS
Cyp20a1	MmuEX0013314	chr1:60423493-60423571	79	chr1:60420201,60423493-60423571,60428065	S	118	0	98.25	0	100	100	SwitchAS
Clip1	MmuEX0011694	chr5:124063077-124065344	2268	chr5:124067345,124063077-124065344,124061947	S	128	16	10.43	0	99.36	99.36	SwitchAS
Clip1	MmuEX0011695	chr5:124077303-124077419	117	chr5:124080234+124080462,124077303-124077419,124073279	S	128	19	86.3	5.53	100	94.47	SwitchAS
Clip1	MmuEX0011696	chr5:124092428-124092625	198	chr5:124096092,124092428-124092625,124091890	S	124	4	95.7	11.36	100	88.64	SwitchAS
Pusl1	MmuEX0038060	chr4:155264862-155265011	150	chr4:155265161,155264862-155265011,155264778	S	123	3	97.07	1.12	100	98.88	SwitchAS
Prdm9	MmuEX0037003	chr17:15690316-15690509	194	chr17:15691652,15690316-15690509,15682324	S	70	4	96.39	10.04	100	89.96	SwitchAS
Prdm9	MmuEX0037005	chr17:15699379-15699486	108	chr17:15699778,15699379-15699486,15696036	S	54	9	95.3	11.11	100	88.89	SwitchAS
1110012J17Rik	MmuEX0000099	chr17:66689824-66689880	57	chr17:66692166,66689824-66689880,66687494	S	83	19	17.83	0	98.69	98.69	SwitchAS
Actn2	MmuEX0003627	chr13:12396581-12396659	79	chr13:12398541,12396581-12396659,12393283	S	48	12	86.67	0	100	100	SwitchAS
Plekhg3	MmuEX0035764	chr12:77664487-77664508	22	chr12:77663290,77664487-77664508,77664742	S	100	9	4.72	0	89.36	89.36	SwitchAS
Jam2	MmuEX0024872	chr16:84819005-84819020	16	chr16:84816618+84816631,84819005-84819020,84821505	S	79	3	96.38	0	100	100	SwitchAS
Mdm4	MmuEX0028335	chr1:134915931-134916008	78	chr1:134921825,134915931-134916008,134915461	S	109	9	4.97	0	92.72	92.72	SwitchAS
Ide	MmuEX0023573	chr19:37355075-37355242	168	chr19:37358611,37355075-37355242,37352503	S	138	3	98.42	0	100	100	SwitchAS
Pus7	MmuEX0038057	chr5:23269152-23269169	18	chr5:23274586,23269152-23269169,23268292	S	109	13	7.16	0	87.56	87.56	SwitchAS
Atl2	MmuEX0006704	chr17:80250227-80250241	15	chr17:80251865,80250227-80250241,80249618	S	135	19	10.82	0	88.07	88.07	SwitchAS
Irak2	MmuEX0024492	chr6:113623017-113623081	65	chr6:113622933,113623017-113623081,113625625	S	88	1	98.39	0	100	100	SwitchAS
Zfp954	MmuEX0053736	chr7:7070497-7070623	127	chr7:7072083,7070497-7070623,7069422	S	104	12	95.01	1.05	100	98.95	SwitchAS
Gak	MmuEX0019946	chr5:109005582-109005698	117	chr5:109009926,109005582-109005698,109001105	S	134	1	98.56	15.34	100	84.66	SwitchAS
Kif1b	MmuEX0025498	chr4:148569582-148569608	27	chr4:148572541,148569582-148569608,148566796	S	123	5	3.85	0	84.17	84.17	SwitchAS
Kif1b	MmuEX0025502	chr4:148639454-148639471	18	chr4:148640361,148639454-148639471,148637799	S	112	16	20.42	0	99.07	99.07	SwitchAS
Brwd3	MmuEX0008326	chrX:105949579-105949650	72	chrX:105950755,105949579-105949650,105948309	S	97	9	95.95	16.18	100	83.82	SwitchAS
Sfxn4	MmuEX0042003	chr19:60934567-60934641	75	chr19:60935932,60934567-60934641,60933279	S	73	16	85.07	0	100	100	SwitchAS
Uty	MmuEX0051194	chrY:497622-497673	52	chrY:504533,497618+497622-497673,495077	S	75	17	7.12	0	100	100	SwitchAS
Msi2	MmuEX0029826	chr11:88181714-88181737	24	chr11:88199547,88181714-88181737,88180349	S	131	13	6	0	86.67	86.67	SwitchAS
Dgkd	MmuEX0014405	chr1:89831913-89832026	114	chr1:89831076,89831913-89832026,89832859	S	131	6	96.47	0	100	100	SwitchAS
Safb	MmuEX0040920	chr17:56744980-56745080	101	chr17:56744822,56744974+56744980-56745080,56745220	S	136	2	98.14	18.84	100	81.16	SwitchAS
Zfp951	MmuEX0053728	chr5:105246327-105246371	45	chr5:105288686+105288958,105246327-105246371,105246142	S	103	18	7.19	0	94.28	94.28	SwitchAS
Svip	MmuEX0045859	chr7:59258716-59258829	114	chr7:59259305,59258716-59258829,59255147	S	110	1	98.5	2.22	100	97.78	SwitchAS
Spint2	MmuEX0044701	chr7:30045076-30045148	73	chr7:30045390,30045076-30045148,30044471	S	116	10	4.54	0	89.68	89.68	SwitchAS
Serpinb1c	MmuEX0041779	chr13:32976090-32976232	143	chr13:32978023,32976090-32976232,32975849+32975913	S	47	11	91.75	3.33	100	96.67	SwitchAS
Fer	MmuEX0019067	chr17:64306474-64306666	193	chr17:64290829,64306474-64306666,64322414	C1	112	10	6.04	0	89.67	89.67	SwitchAS
Myo18a	MmuEX0030453	chr11:77623308-77623360	53	chr11:77591816,77623308-77623360,77631121	C1	112	13	5.81	0	85.71	85.71	SwitchAS
Myo18a	MmuEX0030454	chr11:77625511-77625693	183	chr11:77591816,77625511-77625693,77631121	C1	113	12	5.4	0	86.29	86.29	SwitchAS
Spg7	MmuEX0044665	chr8:125603869-125604031	163	chr8:125603439,125603869-125604031,125604537	S	130	5	97.24	0	100	100	SwitchAS
Dlg3	MmuEX0014809	chrX:98003392-98003491	100	chrX:98002594,98003392-98003491,98006841	C2	100	16	77.93	2.38	100	97.62	SwitchAS
Dlg3	MmuEX0014810	chrX:98005201-98005246	46	chrX:98002594,98005201-98005246,98008065	C2	107	17	19.94	0	98.25	98.25	SwitchAS
Snrpn	MmuEX0044168	chr7:67144204-67144299	96	chr7:67147821+67147832,67144204-67144299,67133633	C3	41	7	94.56	7.46	100	92.54	SwitchAS
Araf	MmuEX0005668	chrX:20431039-20431241	203	chrX:20430942,20431039-20431241,20434738	S	121	0	97.89	2.44	100	97.56	SwitchAS
Mef2d	MmuEX0028567	chr3:87962143-87962277	135	chr3:87960447,87962143-87962277,87963044	C3	131	18	9.23	0	87.5	87.5	SwitchAS
Clpb	MmuEX0011769	chr7:108859925-108860014	90	chr7:108855100,108859925-108860014,108871219	S	130	5	2.65	0	100	100	SwitchAS
Sipa1l2	MmuEX0042431	chr8:127957078-127957209	132	chr8:127963164,127957078-127957209,127946602	C1	117	14	92.94	1.49	100	98.51	SwitchAS
Sipa1l2	MmuEX0042432	chr8:127947093-127947146	54	chr8:127957078,127947093-127947146,127946602	C1	121	17	10.16	0	82.09	82.09	SwitchAS
Ap4e1	MmuEX0005483	chr2:126869157-126869279	123	chr2:126863595,126869157-126869279,126871884	C2	87	10	94.1	0	100	100	SwitchAS
Blvra	MmuEX0008043	chr2:126908668-126908786	119	chr2:126906394,126908668-126908786,126911699	S	131	15	92.97	9.09	100	90.91	SwitchAS
Rab34	MmuEX0038326	chr11:78002707-78002892	186	chr11:78002013,78002512+78002680+78002707-78002892,78003073	S	90	1	98.07	0	100	100	SwitchAS
Stard3nl	MmuEX0045295	chr13:19462119-19462236	118	chr13:19462349,19462119-19462236,19459708	S	128	0	98.13	1.91	100	98.09	SwitchAS
Rad23a	MmuEX0038491	chr8:87362172-87362210	39	chr8:87362368,87362172-87362210+87362227,87362033	S	114	6	96	3.03	100	96.97	SwitchAS
Clcn3	MmuEX0011583	chr8:63406029-63406215	187	chr8:63407868,63406029-63406215,63401985	S	126	2	98.09	0.99	100	99.01	SwitchAS
Tbccd1	MmuEX0046527	chr16:22825839-22826205	367	chr16:22833951,22825839-22826205,22818601	C2	117	1	97.87	2.33	100	97.67	SwitchAS
Tbccd1	MmuEX0046529	chr16:22822776-22822962	187	chr16:22825839,22822776-22822962,22818601	C3	119	15	94.27	2.33	100	97.67	SwitchAS
Tbccd1	MmuEX0046530	chr16:22822155-22822652	498	chr16:22822776,22822155-22822652,22818601	S	125	5	96.59	0	100	100	SwitchAS
Tbccd1	MmuEX0046532	chr16:22814881-22814957	77	chr16:22818454,22814881-22814957,22814029	S	131	12	6.03	0	100	100	SwitchAS
Chn2	MmuEX0011337	chr6:54144020-54144075	56	chr6:54123496,54144020-54144075,54165656	S	82	0	98.15	0	100	100	SwitchAS
BC023814	MmuEX0007380	chr3:87731485-87731582	98	chr3:87731846,87731485-87731582+87731637+87731677,87731039	S	116	2	97.81	1.59	100	98.41	SwitchAS
Wbscr22	MmuEX0051752	chr5:135532209-135532254	46	chr5:135532712,135532209-135532254,135529508+135529592	C2	128	3	98.04	2.56	100	97.44	SwitchAS
Wbscr22	MmuEX0051753	chr5:135531898-135531956	59	chr5:135532209,135531898-135531956,135529508+135529592	S	132	5	97.73	3.39	100	96.61	SwitchAS
Itgae	MmuEX0024640	chr11:72931554-72931699	146	chr11:72930754,72931554-72931699,72931997	S	20	0	94.74	0	100	100	SwitchAS
Runx1t1	MmuEX0040786	chr4:13802624-13802692	69	chr4:13793179,13802624-13802692,13808197	S	58	0	97.54	0	100	100	SwitchAS
Msh5	MmuEX0029813	chr17:35181262-35181383	122	chr17:35182059,35181262-35181383,35181079	C1	27	4	94.51	0	100	100	SwitchAS
Msh5	MmuEX0029818	chr17:35176146-35176284	139	chr17:35178415,35176146-35176284+35176363,35170663	C2	35	11	94.78	0	100	100	SwitchAS
Tle1	MmuEX0047422	chr4:71830156-71830230	75	chr4:71858807,71830126+71830156-71830230,71806454	C3	126	14	94.41	0	100	100	SwitchAS
Pou2f2	MmuEX0036421	chr7:25900490-25900768	279	chr7:25901057,25900490-25900768,25885262	S	39	10	40.43	0	100	100	SwitchAS
Taz	MmuEX0046361	chrX:71534444-71534521	78	chrX:71533852,71534444-71534521,71534638	C2	131	3	97.46	0.72	100	99.28	SwitchAS
Epn3	MmuEX0017127	chr11:94355407-94355487	81	chr11:94356248,94355407-94355487,94355218	S	56	7	90.44	5.38	100	94.62	SwitchAS
2610507B11Rik	MmuEX0001163	chr11:78096561-78096660	100	chr11:78093417,78096561-78096660,78097602	S	133	7	95.04	2.5	100	97.5	SwitchAS
Rdm1	MmuEX0039333	chr11:101492134-101492293	160	chr11:101491674,101492134-101492293,101495116	S	115	4	97.44	9.33	100	90.67	SwitchAS
Brms1l	MmuEX0008276	chr12:56961078-56961174	97	chr12:56946350,56961078-56961174,56962075	S	123	18	94.02	12.96	100	87.04	SwitchAS
Cobra1	MmuEX0012054	chr2:25060647-25060759	113	chr2:25061680,25060647-25060759,25059502	C2	128	0	97.79	2.86	100	97.14	SwitchAS
Card14	MmuEX0009157	chr11:119202305-119202478	174	chr11:119201000,119202305-119202478,119205209	C2	21	10	90.43	7.32	100	92.68	SwitchAS
Nit1	MmuEX0031784	chr1:173274195-173274298	104	chr1:173274419,173274195-173274298,173273958	S	133	2	98.21	2.33	100	97.67	SwitchAS
Wdfy2	MmuEX0051766	chr14:63549065-63549215	151	chr14:63544021,63549065-63549215,63562858	C3	114	1	98.82	19.05	100	80.95	SwitchAS
Wdfy2	MmuEX0051767	chr14:63553127-63553239	113	chr14:63544021,63553127-63553239,63562858	C3	110	0	98.63	0	100	100	SwitchAS
Dguok	MmuEX0014463	chr6:83431772-83431832	61	chr6:83436978,83431772-83431832,83431456	S	134	6	4.85	0	80.49	80.49	SwitchAS
Unkl	MmuEX0050678	chr17:25366184-25366411	228	chr17:25365611,25366184-25366411,25367152	S	99	1	97.75	17.07	100	82.93	SwitchAS
Sirt2	MmuEX0042458	chr7:29562015-29562121	107	chr7:29557227,29562015-29562121,29567788	C3	132	0	98.86	1.45	100	98.55	SwitchAS
Mtmr1	MmuEX0030050	chrX:68630779-68630805	27	chrX:68630085,68630779-68630805,68636375	C3	90	6	2.54	0	97.15	97.15	SwitchAS
Ubl4	MmuEX0050261	chrX:71613492-71613597	106	chrX:71613755,71613492-71613597,71613248+71613310+71613349	S	137	14	95.02	7.51	100	92.49	SwitchAS
Fam116b	MmuEX0017850	chr15:89017386-89017428	43	chr15:89017578,89017386-89017428+89017480,89016857	C3	95	17	94.39	0	100	100	SwitchAS
Fam116b	MmuEX0017851	chr15:89017184-89017249	66	chr15:89017578,89017184-89017249,89016857	C2	98	12	94.67	0	100	100	SwitchAS
Cbx1	MmuEX0009396	chr11:96662743-96662920	178	chr11:96650667,96662743-96662920,96664042	C3	102	19	92.21	0	100	100	SwitchAS
Acsl1	MmuEX0003575	chr8:47557227-47557403	177	chr8:47556584,47557227-47557403,47578154	S	121	7	5.71	0	98.49	98.49	SwitchAS
Cxcl16	MmuEX0013254	chr11:70271578-70271647	70	chr11:70272247,70271578-70271647,70269564	S	95	12	6.43	0	82.22	82.22	SwitchAS
Hars2	MmuEX0022374	chr18:36948811-36948938	128	chr18:36948324,36948811-36948938,36949788	C2	121	17	94.03	18.03	100	81.97	SwitchAS
H13	MmuEX0022263	chr2:152515580-152515637	58	chr2:152514698,152515580-152515637,152517529	S	136	0	97.84	6.38	100	93.62	SwitchAS
Atp6v0a1	MmuEX0006887	chr11:100910773-100910790	18	chr11:100909839,100910773-100910790,100916340	S	125	15	22.73	0	97.15	97.15	SwitchAS
Poc1b	MmuEX0036101	chr10:98627220-98627241	22	chr10:98618985,98627220-98627241,98627503	C1	108	8	4.16	0	98.09	98.09	SwitchAS
Epb4.1l2	MmuEX0016998	chr10:25219582-25219749	168	chr10:25208899,25219582-25219749,25221630	C2	129	6	2.27	0	86.63	86.63	SwitchAS
Ascc2	MmuEX0006385	chr11:4558218-4558328	111	chr11:4556339,4558218-4558328,4559275	S	127	2	98.06	14.29	100	85.71	SwitchAS
Patz1	MmuEX0033785	chr11:3189872-3191887	2016	chr11:3189350,3189872-3191887+3192376,3193283	S	45	20	91.11	14.46	100	85.54	SwitchAS
Ttc15	MmuEX0049439	chr12:29396737-29396849	113	chr12:29405917,29396737-29396849,29388463	S	129	4	96.81	0	100	100	SwitchAS
Ace	MmuEX0003451	chr11:105834175-105834398	224	chr11:105833847+105833854,105834175-105834398,105846852+105846887	C2	85	5	96.4	7.24	100	92.76	SwitchAS
Ace	MmuEX0003456	chr11:105834706-105834850	145	chr11:105833847+105833854,105834706-105834850,105846852+105846887	C3	83	5	96	4.42	100	95.58	SwitchAS
Ace	MmuEX0003457	chr11:105835093-105835191	99	chr11:105833847+105833854,105835093-105835191,105846852+105846887	C3	84	5	95.78	2.54	100	97.46	SwitchAS
Ace	MmuEX0003458	chr11:105835418-105835540	123	chr11:105833847+105833854,105835418-105835540,105846852+105846887	C3	81	4	95.55	2.81	100	97.19	SwitchAS
Ace	MmuEX0003459	chr11:105835981-105836192	212	chr11:105833847+105833854,105835981-105836192,105846852+105846887	C3	81	6	97.17	16.83	100	83.17	SwitchAS
Map3k3	MmuEX0027727	chr11:106012323-106012454	132	chr11:106011732,106012323-106012454,106012932	S	126	12	93.61	0	100	100	SwitchAS
4933427D14Rik	MmuEX0001879	chr11:71993905-71994128	224	chr11:72003050,71993905-71994128,71992073	S	93	2	96.94	1.01	100	98.99	SwitchAS
4933427D14Rik	MmuEX0001880	chr11:71991907-71992073	167	chr11:72003050,71991907-71992073,71990282	C3	97	2	97.82	1.01	100	98.99	SwitchAS
Rabep1	MmuEX0038409	chr11:70700513-70700673	161	chr11:70698470,70700513-70700673,70707071	S	127	5	95.72	9.38	100	90.62	SwitchAS
Rabep1	MmuEX0038412	chr11:70718107-70718285	179	chr11:70714109,70718107-70718285,70730817	C3	126	1	98.62	7.69	100	92.31	SwitchAS
Rabep1	MmuEX0038413	chr11:70721888-70722019	132	chr11:70718285,70721888-70722019,70730817	S	122	0	98.35	5.26	100	94.74	SwitchAS
0610007P14Rik	MmuEX0000027	chr12:87163038-87163194	157	chr12:87165421,87163038-87163194+87163198,87160519	S	132	2	97.61	11.11	100	88.89	SwitchAS
Cyp46a1	MmuEX0013375	chr12:109590541-109590629	89	chr12:109590234+109590412,109590541-109590629,109590984	S	42	19	16.25	0	100	100	SwitchAS
Meg3	MmuEX0028574	chr12:110787729-110787762	34	chr12:110787581,110787689+110787729-110787762+110787789,110787863	C2	99	2	97.81	2.44	100	97.56	SwitchAS
Ggps1	MmuEX0020366	chr13:14144545-14144660	116	chr13:14163911,14144545-14144660,14144363+14144397	C2	63	2	97.74	0	100	100	SwitchAS
Lrrc16a	MmuEX0026940	chr13:24141512-24141529	18	chr13:24156446,24141512-24141529,24136951	S	91	18	7.46	0	85.08	85.08	SwitchAS
Cenpp	MmuEX0010852	chr13:49644321-49644423	103	chr13:49722624,49644321-49644423,49561127	S	77	3	2.97	0	90.79	90.79	SwitchAS
Riok1	MmuEX0039903	chr13:38138720-38138776	57	chr13:38137184,38138720-38138776,38139114	S	117	3	3.35	0	99.14	99.14	SwitchAS
Fam193b	MmuEX0018224	chr13:55655578-55655809	232	chr13:55672136,55655578-55655809,55645150	C3	124	16	94.8	14.75	100	85.25	SwitchAS
Fastkd3	MmuEX0018667	chr13:68723013-68723233	221	chr13:68721141+68721227+68721475+68721495,68723013-68723233,68724055	S	32	19	92.18	10.34	100	89.66	SwitchAS
Col4a3bp	MmuEX0012289	chr13:97404028-97404156	129	chr13:97400786,97404028-97404156,97404809	S	134	0	98.89	2.04	100	97.96	SwitchAS
Nr1d2	MmuEX0032251	chr14:19049164-19049308	145	chr14:19071325,19049164-19049308,19044478	C3	114	6	95.06	3.45	100	96.55	SwitchAS
Nr1d2	MmuEX0032252	chr14:19047388-19048007	620	chr14:19071325,19047388-19048007,19044478	C3	118	6	96.38	10	100	90	SwitchAS
Ldb3	MmuEX0026260	chr14:35384904-35385107	204	chr14:35386176,35384904-35385107,35380753	C2	51	18	48.82	0	100	100	SwitchAS
Mettl6	MmuEX0028762	chr14:32305508-32305642	135	chr14:32306423+32306783,32305508-32305642,32300905+32300927	S	49	10	92.67	14.48	100	85.52	SwitchAS
Cryl1	MmuEX0012823	chr14:57981759-57981881	123	chr14:58001595,57981759-57981881+57981885,57931966	S	112	0	98.58	0	100	100	SwitchAS
Xpo4	MmuEX0052387	chr14:58257056-58257194	139	chr14:58267256,58257056-58257194,58249169	C3	87	3	96.86	0	100	100	SwitchAS
Zdhhc20	MmuEX0052919	chr14:58492730-58492833	104	chr14:58497270,58492730-58492833,58484478	S	122	11	95.47	0	100	100	SwitchAS
Zdhhc20	MmuEX0052921	chr14:58468982-58469017	36	chr14:58475447,58468982-58469017,58465899	S	118	19	10.18	0	88.98	88.98	SwitchAS
Mipep	MmuEX0029056	chr14:61462045-61462119	75	chr14:61452931,61462045-61462119,61490855	C2	132	0	98.51	8.97	100	91.03	SwitchAS
Ppp3cc	MmuEX0036798	chr14:70625735-70625761	27	chr14:70634947,70625735-70625761,70624855	C1	106	15	9.21	0	90.35	90.35	SwitchAS
Zfp263	MmuEX0053130	chr16:3745777-3745957	181	chr16:3744767+3745214,3745777-3745957,3746771	C2	116	9	95.82	18.92	100	81.08	SwitchAS
Hsf1	MmuEX0023332	chr15:76326883-76327019	137	chr15:76326508,76326883-76327019,76328198	C3	134	1	97.7	17.58	100	82.42	SwitchAS
Ptk2	MmuEX0037745	chr15:73113697-73113777	81	chr15:73122465,73113697-73113777+73113780,73107343	C2	128	12	4.95	0	82.25	82.25	SwitchAS
Shank3	MmuEX0042256	chr15:89368446-89368469	24	chr15:89363885,89368446-89368469,89373531	S	75	17	23.92	0	96.75	96.75	SwitchAS
Ppil2	MmuEX0036582	chr16:17107272-17107317	46	chr16:17111236,17107272-17107317,17100400	C3	137	4	96.65	4.76	100	95.24	SwitchAS
Ppil2	MmuEX0036583	chr16:17106086-17106148	63	chr16:17111236,17106086-17106148,17100400	C3	138	3	96.9	16.67	100	83.33	SwitchAS
Snx4	MmuEX0044291	chr16:33290185-33290284	100	chr16:33287867,33290185-33290284,33294727	C3	28	18	89	0	100	100	SwitchAS
Clcn2	MmuEX0011576	chr16:20709643-20709702	60	chr16:20709953,20709643-20709702+20709753+20709797,20709388	S	106	5	97.81	0	100	100	SwitchAS
Clcn2	MmuEX0011577	chr16:20709175-20709388	214	chr16:20709643,20709150+20709175-20709388,20708840	S	101	11	95.07	0	100	100	SwitchAS
Rhebl1	MmuEX0039725	chr15:98709439-98709486	48	chr15:98709690,98709439-98709486,98708965+98709024	S	96	7	96.38	8.54	100	91.46	SwitchAS
Crim1	MmuEX0012731	chr17:78767132-78767326	195	chr17:78754517,78767132-78767326,78769335	S	112	1	97.38	0	100	100	SwitchAS
Ttc27	MmuEX0049500	chr17:75176984-75177079	96	chr17:75169696,75176984-75177079,75198524	C2	119	3	97.49	0	100	100	SwitchAS
Ttc27	MmuEX0049501	chr17:75180123-75180245	123	chr17:75177079,75180123-75180245,75198524	S	116	2	97.61	0	100	100	SwitchAS
Ttc27	MmuEX0049502	chr17:75228832-75228930	99	chr17:75198622+75198751,75228832-75228930,75255749	C3	121	2	97.53	14.63	100	85.37	SwitchAS
Ttc27	MmuEX0049503	chr17:75234673-75234725	53	chr17:75228930,75234673-75234725,75255749	C3	117	4	96.42	15.66	100	84.34	SwitchAS
Ttc27	MmuEX0049504	chr17:75239639-75239804	166	chr17:75234725,75239639-75239804,75255749	S	121	2	97.96	11.39	100	88.61	SwitchAS
Abca3	MmuEX0002982	chr17:24544503-24544690	188	chr17:24542283+24542384,24544503-24544690,24546809	C2	118	4	96.89	3.03	100	96.97	SwitchAS
Srbd1	MmuEX0044837	chr17:86508567-86508674	108	chr17:86514533,86508567-86508674,86502340	S	112	6	95.9	0	100	100	SwitchAS
Itfg3	MmuEX0024570	chr17:26355580-26355696	117	chr17:26357226,26355580-26355696,26355263	S	128	0	98.26	2.13	100	97.87	SwitchAS
Dtna	MmuEX0015811	chr18:23768965-23769042	78	chr18:23761175,23768965-23769042,23779888	C1	87	16	15.45	0	97.4	97.4	SwitchAS
Dtna	MmuEX0015812	chr18:23769565-23769657	93	chr18:23761175,23769565-23769657,23779888	C1	86	16	16.58	0	98.02	98.02	SwitchAS
Epb4.1l4a	MmuEX0017019	chr18:34039841-34039919	79	chr18:34046005,34039841-34039919+34039938,34038686	S	63	6	94.96	0	100	100	SwitchAS
Bin1	MmuEX0007976	chr18:32588850-32588957	108	chr18:32584621,32588850-32588957,32591637	C3	120	18	16.82	0	96.02	96.02	SwitchAS
Bin1	MmuEX0007977	chr18:32589354-32589377	24	chr18:32584621,32589354-32589377,32591637	C3	120	18	17.62	0	99.45	99.45	SwitchAS
Nedd4l	MmuEX0031403	chr18:65331929-65332060	132	chr18:65325300,65331929-65332060,65338573	C3	127	17	92.02	0	100	100	SwitchAS
Nedd4l	MmuEX0031404	chr18:65332570-65332689	120	chr18:65325300,65332570-65332689,65338573	C3	128	17	90.49	2.44	100	97.56	SwitchAS
Naa40	MmuEX0030756	chr19:7304438-7304596	159	chr19:7304678,7304438-7304596,7304295	S	119	11	94.9	6.25	100	93.75	SwitchAS
Vti1a	MmuEX0051652	chr19:55461679-55461699	21	chr19:55455509,55461679-55461699,55466274	S	126	19	14.76	0	97.56	97.56	SwitchAS
Tcf7l2	MmuEX0046693	chr19:56002220-56002244	25	chr19:56000539,56002220-56002244,56005924	C3	80	14	6.76	0	86.94	86.94	SwitchAS
Hells	MmuEX0022698	chr19:39024678-39024874	197	chr19:39021358,39024678-39024874,39026325	S	76	3	97.46	14.29	100	85.71	SwitchAS
Ablim1	MmuEX0003302	chr19:57151904-57151987	84	chr19:57154303,57151904-57151987,57143427	S	116	8	4.37	0	84.29	84.29	SwitchAS
Aspscr1	MmuEX0006482	chr11:120562795-120562876	82	chr11:120562597,120562795-120562876,120563798	S	135	0	98.5	6.9	100	93.1	SwitchAS
Parp6	MmuEX0033739	chr9:59487847-59487956	110	chr9:59485508,59487847-59487956,59496637	C3	123	7	96.23	0	100	100	SwitchAS
Pfkfb1	MmuEX0034563	chrX:147074124-147074253	130	chrX:147069170,147074124-147074253,147076458	S	70	1	96.29	2.7	100	97.3	SwitchAS
Slc28a1	MmuEX0043004	chr7:88313850-88313948	99	chr7:88309609,88313850-88313948,88314053	C2	23	0	93.66	0	100	100	SwitchAS
Raph1	MmuEX0038826	chr1:60548304-60548379	76	chr1:60550382,60548304-60548379,60547165	C2	113	14	6.93	0	81.93	81.93	SwitchAS
Agfg1	MmuEX0004230	chr1:82888035-82888082	48	chr1:82883042,82888035-82888082,82889999	C1	132	18	10.85	0	82.94	82.94	SwitchAS
Bcs1l	MmuEX0007896	chr1:74637245-74637308	64	chr1:74637033,74637245-74637308,74637534	S	126	10	94.43	0	100	100	SwitchAS
Plcd4	MmuEX0035602	chr1:74609288-74609388	101	chr1:74607067,74609288-74609388+74609404,74610951	C3	48	12	91.29	0	100	100	SwitchAS
Plcd4	MmuEX0035603	chr1:74610025-74610197	173	chr1:74607067,74610025-74610197,74610951	C2	48	19	90.69	11.02	100	88.98	SwitchAS
Pecr	MmuEX0034419	chr1:72322740-72322905	166	chr1:72323861,72322740-72322905,72321541	S	113	17	93.16	0	100	100	SwitchAS
Lrrfip1	MmuEX0027123	chr1:92985211-92985288	78	chr1:92965226,92985211-92985288,92997154	C2	122	15	8.19	0	92.86	92.86	SwitchAS
Scly	MmuEX0041232	chr1:93204891-93205018	128	chr1:93202009+93202031,93204870+93204891-93205018,93216462	C3	120	0	99.01	0	100	100	SwitchAS
Scly	MmuEX0041233	chr1:93205228-93205392	165	chr1:93202009+93202031,93205228-93205392,93216462	C3	123	0	99.06	1.37	100	98.63	SwitchAS
Scly	MmuEX0041235	chr1:93212066-93212102	37	chr1:93202009+93202031,93212066-93212102,93216462	C3	128	0	99.1	0	100	100	SwitchAS
Scly	MmuEX0041236	chr1:93213641-93213724	84	chr1:93202009+93202031,93213641-93213724,93216462	C3	128	0	99.12	1.37	100	98.63	SwitchAS
Tor1aip1	MmuEX0048531	chr1:157867098-157867153	56	chr1:157869430,157867098-157867153,157865389+157865660	S	126	18	16.25	0	100	100	SwitchAS
Sephs1	MmuEX0041698	chr2:4810229-4810332	104	chr2:4805651,4810229-4810332,4812633+4812638	S	127	11	95.01	1.64	100	98.36	SwitchAS
Sephs1	MmuEX0041699	chr2:4812638-4812740	103	chr2:4810332,4812633+4812638-4812740,4814231	S	130	5	96.75	3.23	100	96.77	SwitchAS
Sephs1	MmuEX0041700	chr2:4814231-4814385	155	chr2:4812740,4814231-4814385,4817735	S	128	2	98.07	4.76	100	95.24	SwitchAS
Sephs1	MmuEX0041701	chr2:4817735-4817825	91	chr2:4814385,4817735-4817825,4826518	C3	128	0	98.6	4.76	100	95.24	SwitchAS
Sephs1	MmuEX0041702	chr2:4820510-4820609	100	chr2:4817825,4820510-4820609,4826518	S	133	1	98.76	10.45	100	89.55	SwitchAS
Pfkfb3	MmuEX0034574	chr2:11399663-11399685	23	chr2:11401825,11399663-11399685,11396170	C1	107	18	14.62	0	97.21	97.21	SwitchAS
Psmd14	MmuEX0037549	chr2:61599032-61599151	120	chr2:61598764,61599032-61599151,61601894	S	136	2	97.92	14.41	100	85.59	SwitchAS
Camsap1	MmuEX0009003	chr2:25810780-25810812	33	chr2:25811767,25810780-25810812,25808339	C3	32	19	60.88	0	100	100	SwitchAS
Camsap1	MmuEX0009004	chr2:25809435-25809494	60	chr2:25811767,25809423+25809435-25809494,25808339	C3	32	16	20.25	0	95.72	95.72	SwitchAS
Tmem141	MmuEX0047743	chr2:25476895-25476978	84	chr2:25477128,25476881+25476895-25476978,25476687+25476693	S	122	2	98.19	10.11	100	89.89	SwitchAS
Slc43a1	MmuEX0043326	chr2:84696914-84697060	147	chr2:84695806,84696914-84697060,84699846	C2	66	14	94.08	1.8	100	98.2	SwitchAS
Slc43a1	MmuEX0043327	chr2:84697218-84697253	36	chr2:84697060,84697218-84697253,84699846	C2	64	9	94.42	1.8	100	98.2	SwitchAS
Slc43a1	MmuEX0043328	chr2:84697441-84697594	154	chr2:84697253,84697441-84697594,84699846	S	69	6	95.21	1.49	100	98.51	SwitchAS
Slc43a1	MmuEX0043329	chr2:84699846-84699987	142	chr2:84697594,84699846-84699987,84703040	C2	77	6	95.08	2.94	100	97.06	SwitchAS
Slc43a1	MmuEX0043330	chr2:84700247-84700320	74	chr2:84699987,84700247-84700320,84703040	C3	73	12	93.52	1.49	100	98.51	SwitchAS
Slc43a1	MmuEX0043331	chr2:84701533-84701656	124	chr2:84700320,84701533-84701656,84703040	S	78	12	93.98	4.35	100	95.65	SwitchAS
Snap23	MmuEX0044058	chr2:120416399-120416431	33	chr2:120412012,120416399-120416431,120420537	C1	131	8	5.26	0	93.49	93.49	SwitchAS
Spint1	MmuEX0044698	chr2:119073747-119073917	171	chr2:119072383,119073747-119073917,119074493+119074931	C3	73	5	96.29	0.9	100	99.1	SwitchAS
Spint1	MmuEX0044699	chr2:119074092-119074139	48	chr2:119073917,119074092-119074139,119074493+119074931	S	73	4	96.13	0.9	100	99.1	SwitchAS
Adam33	MmuEX0003781	chr2:130878959-130879036	78	chr2:130879126,130878959-130879036+130879054,130878886	S	36	6	94.29	0	100	100	SwitchAS
Mtfr1	MmuEX0029993	chr3:19108491-19108527	37	chr3:19106550,19108491-19108527,19111468	S	32	19	80.59	0	100	100	SwitchAS
Fam48a	MmuEX0018336	chr3:54500406-54500441	36	chr3:54499129,54500406-54500441,54502515	C3	124	16	94.6	14.7	100	85.3	SwitchAS
Fam48a	MmuEX0018337	chr3:54500873-54500931	59	chr3:54500441,54500810+54500873-54500931,54502515	S	117	12	94.97	16.68	100	83.32	SwitchAS
Bche	MmuEX0007821	chr3:73510461-73510516	56	chr3:73512057,73510461-73510516,73506021	S	52	8	6.71	0	100	100	SwitchAS
Kcnq5	MmuEX0025146	chr1:21456464-21456490	27	chr1:21459551,21456464-21456490,21447705+21447732	S	29	10	47.57	0	100	100	SwitchAS
Kcnq5	MmuEX0025147	chr1:21451632-21451688	57	chr1:21456464,21451632-21451688,21447705+21447732	C2	29	3	2.9	0	81.44	81.44	SwitchAS
Ash1l	MmuEX0006426	chr3:88871077-88871163	87	chr3:88870342,88871077-88871163,88872909	S	111	3	98.48	10.91	100	89.09	SwitchAS
Apoa1bp	MmuEX0005573	chr3:87861646-87861759	114	chr3:87861843,87861642+87861646-87861759,87861055	S	137	1	97.82	11.11	100	88.89	SwitchAS
Tars2	MmuEX0046304	chr3:95552410-95552477	68	chr3:95554262,95552410-95552477+95552556,95552063	S	133	14	93.81	0	100	100	SwitchAS
Tars2	MmuEX0046305	chr3:95551965-95552063	99	chr3:95554262,95551965-95552063,95550093	C3	127	4	96.16	0	100	100	SwitchAS
Tars2	MmuEX0046306	chr3:95551362-95551579	218	chr3:95551965,95551362-95551579,95550093	C3	127	15	93.84	2.75	100	97.25	SwitchAS
Tars2	MmuEX0046307	chr3:95550458-95550620	163	chr3:95551362,95550458-95550620,95550093	S	129	8	95.13	0	100	100	SwitchAS
Asph	MmuEX0006462	chr4:9551507-9551548	42	chr4:9563048+9563058,9551507-9551548,9538085	S	115	10	6.38	0	97.29	97.29	SwitchAS
Odf2l	MmuEX0032973	chr3:144809727-144809885	159	chr3:144807380,144809727-144809885,144811495	S	99	6	6.16	0	93.24	93.24	SwitchAS
Pdlim5	MmuEX0034291	chr3:141975087-141975178	92	chr3:141977370,141975087-141975178+141975505,141969262	C3	62	19	81.41	0.37	100	99.63	SwitchAS
Unc13b	MmuEX0050610	chr4:43179540-43179572	33	chr4:43178850,43179540-43179572,43193200	S	52	15	9.04	0	89.74	89.74	SwitchAS
Osbpl9	MmuEX0033254	chr4:108764266-108764304	39	chr4:108771108,108764266-108764304,108745754	C3	101	18	92.9	2.79	100	97.21	SwitchAS
Echdc2	MmuEX0016199	chr4:107846400-107846456	57	chr4:107842553+107842831,107846400-107846456,107846592	C2	121	2	97.84	1.2	100	98.8	SwitchAS
Ccdc30	MmuEX0009729	chr4:119051752-119051877	126	chr4:119066147+119066162,119051752-119051877,119032342	C3	24	12	9.38	0	99.71	99.71	SwitchAS
Kif2c	MmuEX0025584	chr4:116851006-116851189	184	chr4:116853177,116850947+116851006-116851189+116851193,116850851	S	74	8	4.67	0	92.62	92.62	SwitchAS
Eif4g3	MmuEX0016639	chr4:137651824-137651844	21	chr4:137638903,137651824-137651844,137652667	C2	131	18	10.04	0	82.68	82.68	SwitchAS
Meaf6	MmuEX0028432	chr4:124784761-124784790	30	chr4:124780275,124784761-124784790,124785567	C2	127	18	17.69	0	94.53	94.53	SwitchAS
Trnau1ap	MmuEX0049063	chr4:131877604-131877725	122	chr4:131881123,131877594+131877604-131877725,131870282	C3	132	13	93.91	0	100	100	SwitchAS
Trnau1ap	MmuEX0049064	chr4:131875370-131875489	120	chr4:131881123,131875370-131875489,131870282	C2	136	5	96.17	14.41	100	85.59	SwitchAS
Taf12	MmuEX0046166	chr4:131837909-131837993	85	chr4:131830402,131837909-131837993,131838709	S	131	9	4.04	0	94.29	94.29	SwitchAS
Agtrap	MmuEX0004341	chr4:147456380-147456485	106	chr4:147458068,147456380-147456485,147455867	S	117	0	98.49	1.57	100	98.43	SwitchAS
Morn1	MmuEX0029444	chr4:154466378-154466468	91	chr4:154465010+154465102,154466378-154466468,154475375	C2	71	3	95.27	2.56	100	97.44	SwitchAS
Khk	MmuEX0025387	chr5:31229395-31229529	135	chr5:31227228,31229374+31229395-31229529,31230816	C1	108	12	14.77	0	98.93	98.93	SwitchAS
Nudt9	MmuEX0032635	chr5:104483291-104483386	96	chr5:104479836,104483291-104483386,104487126	C2	135	4	95.67	5.41	100	94.59	SwitchAS
Nudt9	MmuEX0032636	chr5:104484509-104484595	87	chr5:104479836,104484509-104484595,104487126	C3	134	3	96.07	5.41	100	94.59	SwitchAS
Tmed2	MmuEX0047639	chr5:124993496-124993516	21	chr5:124993173,124993496-124993516,124996905	S	28	4	73.73	0	100	100	SwitchAS
Rilpl1	MmuEX0039830	chr5:124946192-124946279	88	chr5:124951849,124946192-124946279,124943853	C3	124	14	6.09	0	85.08	85.08	SwitchAS
Rilpl1	MmuEX0039831	chr5:124945908-124945931	24	chr5:124951849,124945908-124945931,124943853	C3	124	16	7.48	0	89.92	89.92	SwitchAS
Cdk8	MmuEX0010625	chr5:147079791-147079862	72	chr5:147071156,147079791-147079862+147079901,147095205	C1	77	17	92.46	13.98	100	86.02	SwitchAS
Ccdc136	MmuEX0009556	chr6:29371991-29372097	107	chr6:29361385,29371991-29372097,29376625	C3	95	19	20.25	0	97.86	97.86	SwitchAS
Aplf	MmuEX0005567	chr6:87608427-87608559	133	chr6:87613679,87608423+87608427-87608559,87603881+87603886	C2	101	7	96.7	5.26	100	94.74	SwitchAS
Itpr1	MmuEX0024734	chr6:108373327-108373359	33	chr6:108367994,108373327-108373359,108388294	C2	105	10	14.81	0	96.97	96.97	SwitchAS
Itpr1	MmuEX0024735	chr6:108381455-108381490	36	chr6:108367994,108381455-108381490,108388294	C3	106	15	19.69	0	97.4	97.4	SwitchAS
Plekha5	MmuEX0035714	chr6:140512089-140512169	81	chr6:140501319,140512089-140512169,140517874	C2	113	14	12.19	0	95.57	95.57	SwitchAS
Golt1b	MmuEX0021470	chr6:142340850-142340941	92	chr6:142335889,142340850-142340941,142344708	C3	126	17	93.5	19.44	100	80.56	SwitchAS
Rad18	MmuEX0038483	chr6:112631333-112631670	338	chr6:112636710+112636733,112631333-112631670,112625924	C2	81	0	98.14	4.5	100	95.5	SwitchAS
Rad18	MmuEX0038484	chr6:112629911-112630010	100	chr6:112636710+112636733,112629911-112630010,112625924	C2	82	0	98.09	4.5	100	95.5	SwitchAS
Rad18	MmuEX0038485	chr6:112625740-112625924	185	chr6:112629911,112625740-112625924,112615332	C3	91	0	98.32	1.85	100	98.15	SwitchAS
Rad18	MmuEX0038486	chr6:112622118-112622194	77	chr6:112625740,112622118-112622194,112615332	S	95	2	97.28	0.93	100	99.07	SwitchAS
Atg7	MmuEX0006678	chr6:114674912-114674992	81	chr6:114663386,114674912-114674992,114726975	S	131	2	97.89	0.9	100	99.1	SwitchAS
Ift122	MmuEX0023667	chr6:115832665-115832841	177	chr6:115831641,115832665-115832841,115834354	S	96	8	5.97	0	85.2	85.2	SwitchAS
Qpctl	MmuEX0038153	chr7:19730233-19730385	153	chr7:19732219,19730233-19730385,19730108	S	116	10	94.54	12.82	100	87.18	SwitchAS
Iqgap1	MmuEX0024448	chr7:87874530-87874577	48	chr7:87874955,87874530-87874577,87873967	S	122	18	8.47	0	84.81	84.81	SwitchAS
Ccdc101	MmuEX0009459	chr7:133815248-133815394	147	chr7:133815174+133815181,133815248-133815394,133815552	S	133	6	96.66	2.01	100	97.99	SwitchAS
Cln3	MmuEX0011742	chr7:133723658-133723743	86	chr7:133723847,133723658-133723743,133722987	S	114	2	98.4	0	100	100	SwitchAS
Spns1	MmuEX0044750	chr7:133517436-133517487	52	chr7:133518581,133517436-133517487+133517587,133517350	S	127	4	96.6	5.39	100	94.61	SwitchAS
Rbbp6	MmuEX0038996	chr7:130126477-130126521	45	chr7:130122126,130126477-130126521,130128507	S	109	1	98.82	18.04	100	81.96	SwitchAS
Tacc2	MmuEX0046130	chr7:137888041-137888130	90	chr7:137885815,137888041-137888130,137894704	C2	126	14	9.78	0	98.39	98.39	SwitchAS
Zranb1	MmuEX0054026	chr7:140162869-140163022	154	chr7:140158377,140162869-140163022,140172964	C2	128	5	95.65	8.77	100	91.23	SwitchAS
Pgap2	MmuEX0034606	chr7:109379780-109379939	160	chr7:109374959,109379780-109379939,109384608	C1	120	10	5.13	0	91.27	91.27	SwitchAS
Porcn	MmuEX0036389	chrX:7780918-7780961	44	chrX:7782691,7780918-7780961,7778402	C3	101	19	92.21	0	100	100	SwitchAS
Rpgr	MmuEX0040361	chrX:9753129-9754007	879	chrX:9755397,9753129-9754007,9743402	S	83	5	6.35	0	100	100	SwitchAS
Rpgr	MmuEX0040363	chrX:9776037-9776161	125	chrX:9783249,9776037-9776161,9759178	C3	87	17	94.13	0	100	100	SwitchAS
Rpgr	MmuEX0040364	chrX:9773098-9773280	183	chrX:9783249,9773098-9773280,9759178	C3	85	18	94.06	0	100	100	SwitchAS
Rpgr	MmuEX0040365	chrX:9771944-9772109	166	chrX:9783249,9771944-9772109,9759178	C2	90	13	94.86	4.76	100	95.24	SwitchAS
Arhgap6	MmuEX0005909	chrX:165732974-165733063	90	chrX:165719990,165732974-165733063,165737995	C1	43	2	4.52	0	94.59	94.59	SwitchAS
Arhgap6	MmuEX0005910	chrX:165736353-165736401	49	chrX:165733063,165736353-165736401,165737995	C3	43	0	4.45	0	93.22	93.22	SwitchAS
Pdlim3	MmuEX0034277	chr8:46993823-46994010	188	chr8:46985913,46993823-46994010,47000483	C3	85	19	80.55	0.16	100	99.84	SwitchAS
Tmem38a	MmuEX0047951	chr8:75108599-75108716	118	chr8:75105171,75108599-75108716,75109761	S	116	14	94.5	0	100	100	SwitchAS
Ntpcr	MmuEX0032545	chr8:128261223-128261319	97	chr8:128260125+128260130,128261223-128261319,128269136+128269140	S	126	16	93.65	0	100	100	SwitchAS
Mre11a	MmuEX0029634	chr9:14629585-14629801	217	chr9:14623922,14629585-14629801,14630979	S	111	6	95.44	1.39	100	98.61	SwitchAS
Egln1	MmuEX0016433	chr8:127437917-127438053	137	chr8:127439561,127437917-127438053,127435708	S	135	18	93.01	15	100	85	SwitchAS
Bckdhb	MmuEX0007834	chr9:83885321-83885429	109	chr9:83818966,83885321-83885429,83903861	C3	120	16	93.96	13.25	100	86.75	SwitchAS
Usp28	MmuEX0050910	chr9:48840614-48840793	180	chr9:48840458,48840614-48840793,48843698	C1	122	16	10.66	0	100	100	SwitchAS
Fam96a	MmuEX0018501	chr9:65981460-65981529	70	chr9:65981288,65981460-65981529,65984109	C1	134	1	2.46	0	80.39	80.39	SwitchAS
Trak1	MmuEX0048746	chr9:121378103-121378205	103	chr9:121369632+121369695+121369833,121378103-121378205,121381355	C1	126	2	97.85	8.99	100	91.01	SwitchAS
Trak1	MmuEX0048747	chr9:121379346-121379438	93	chr9:121378205,121379346-121379438,121381355	S	128	9	5.52	0	95.21	95.21	SwitchAS
Malt1	MmuEX0027594	chr18:65616411-65616489	79	chr18:65613358,65616411-65616489,65617823	S	38	16	9.81	0	94.02	94.02	SwitchAS
Ablim3	MmuEX0003323	chr18:61981527-61981682	156	chr18:61983521,61981527-61981682,61979571	C2	73	12	25.44	0	100	100	SwitchAS
Ablim3	MmuEX0003324	chr18:61980021-61980050	30	chr18:61983521,61980021-61980050,61979571	C2	73	15	26.26	0	100	100	SwitchAS
Ccdc88a	MmuEX0009965	chr11:29398409-29398612	204	chr11:29394093,29398409-29398612,29399335	C1	90	17	92.7	0	100	100	SwitchAS
Ccdc88a	MmuEX0009966	chr11:29400976-29401056	81	chr11:29399406,29400976-29401056,29403383	S	99	14	94.22	0	100	100	SwitchAS
Ccdc88a	MmuEX0009967	chr11:29403383-29403651	269	chr11:29401056,29403383-29403651,29403852+29403883	S	92	10	94.63	2.13	100	97.87	SwitchAS
Rnft2	MmuEX0040214	chr5:118687136-118687605	470	chr5:118692467,118687136-118687605+118687608,118684226	S	61	7	95.53	0	100	100	SwitchAS
Rnft2	MmuEX0040215	chr5:118684150-118684226	77	chr5:118692467,118684150-118684226,118682511	C3	60	2	97.2	0	100	100	SwitchAS
Lmo7	MmuEX0026631	chr14:102315110-102315151	42	chr14:102313554,102315110-102315151,102316848	C3	70	10	7.49	0	94.94	94.94	SwitchAS
Tbc1d4	MmuEX0046482	chr14:101874294-101874458	165	chr14:101876197,101874294-101874458,101864981	S	85	12	9.76	0	100	100	SwitchAS
Atg9a	MmuEX0006682	chr1:75179468-75179690	223	chr1:75181030,75179468-75179690,75179311	S	123	4	97.9	6.93	100	93.07	SwitchAS
Shf	MmuEX0042286	chr2:122181211-122181351	141	chr2:122182819,122181211-122181351,122179933	S	106	19	22.47	0	99.51	99.51	SwitchAS
Clasp2	MmuEX0011526	chr9:113771554-113771580	27	chr9:113771405,113771554-113771580,113777666	C2	116	15	6.94	0	90.53	90.53	SwitchAS
Clasp2	MmuEX0011538	chr9:113762467-113762522	56	chr9:113761908,113762467-113762522,113799076	C3	115	6	96.26	18.1	100	81.9	SwitchAS
Snap91	MmuEX0044071	chr9:86693373-86693534	162	chr9:86699278+86699290,86693373-86693534,86678267	C3	49	16	72.15	3.83	100	96.17	SwitchAS
Snap91	MmuEX0044077	chr9:86684889-86684972	84	chr9:86699278+86699290,86684889-86684972,86678267	C2	50	14	51.01	0	100	100	SwitchAS
Eri3	MmuEX0017314	chr4:117260390-117260585	196	chr4:117255321,117260390-117260585,117261703	S	135	9	5.88	0	100	100	SwitchAS
Catsper2	MmuEX0009317	chr2:121225473-121225572	100	chr2:121225780,121225473-121225572,121223624	C3	42	14	16.13	0	93.02	93.02	SwitchAS
Ppip5k1	MmuEX0036606	chr2:121148930-121149112	183	chr2:121153381,121148930-121149112,121147528	C2	114	19	6.65	0	90.32	90.32	SwitchAS
Stard9	MmuEX0045317	chr2:120539101-120539303	203	chr2:120538975,120539101-120539303,120539483	S	80	4	96.59	0	100	100	SwitchAS
Stard9	MmuEX0045318	chr2:120539483-120539562	80	chr2:120539303,120539483-120539562,120539741	S	77	6	96.44	0	100	100	SwitchAS
Alg3	MmuEX0004649	chr16:20608559-20608719	161	chr16:20608815,20608559-20608719,20607957	S	127	17	93.15	0.69	100	99.31	SwitchAS
Pxk	MmuEX0038098	chr14:8992513-8992545	33	chr14:8987859,8992513-8992545,8996449	S	132	18	11.49	0	91.08	91.08	SwitchAS
Dnajc17	MmuEX0015200	chr2:119009653-119009738	86	chr2:119011765,119009653-119009738,119009431	C2	125	2	97.74	1.64	100	98.36	SwitchAS
Mtmr3	MmuEX0030091	chr11:4384674-4384700	27	chr11:4385366,4384674-4384700,4382942	S	135	9	5.57	0	83.65	83.65	SwitchAS
Diap2	MmuEX0014650	chrX:126581861-126581962	102	chrX:126507145,126581861-126581962,126584903	S	63	2	97.6	0	100	100	SwitchAS
Gpatch8	MmuEX0021547	chr11:102389408-102389480	73	chr11:102399596,102389408-102389480,102369525	C1	116	7	96.22	1.75	100	98.25	SwitchAS
G6pc3	MmuEX0019851	chr11:102054063-102054181	119	chr11:102053877,102054063-102054181,102054399	S	130	1	98.08	0	100	100	SwitchAS
Unc13a	MmuEX0050593	chr8:74190540-74190569	30	chr8:74195499+74195525,74190540-74190569,74189977	S	33	12	76.29	0	100	100	SwitchAS
Grip1	MmuEX0021916	chr10:119475655-119475849	195	chr10:119475486,119475655-119475849,119486407	S	50	10	89.04	3.45	100	96.55	SwitchAS
Acot11	MmuEX0003501	chr4:106422488-106422619	132	chr4:106425432+106425467,106422488-106422619,106420870+106421089	C2	89	8	91.25	0	100	100	SwitchAS
Acot11	MmuEX0003502	chr4:106421867-106421993	127	chr4:106422488,106421867-106421993,106420870+106421089	S	95	9	92.13	0	100	100	SwitchAS
F630110N24Rik	MmuEX0017736	chr10:80824059-80824244	186	chr10:80823982,80824059-80824244,80824770	S	115	0	98.07	0	100	100	SwitchAS
Cog7	MmuEX0012106	chr7:129080468-129080654	187	chr7:129087292,129080468-129080654,129074127	C3	128	0	98.6	0	100	100	SwitchAS
Cog7	MmuEX0012107	chr7:129079172-129079312	141	chr7:129080468,129079172-129079312,129074127	S	129	0	98.82	6.25	100	93.75	SwitchAS
Vps13c	MmuEX0051463	chr9:67713987-67714049	63	chr9:67708692,67713987-67714049,67718983	C1	69	17	20.72	0	100	100	SwitchAS
Prdm8	MmuEX0036998	chr5:98613617-98613708	92	chr5:98612528+98612571,98613188+98613480+98613617-98613708,98614043+98614063	C3	32	16	86.43	11.26	100	88.74	SwitchAS
Prdm8	MmuEX0036999	chr5:98613737-98613787	51	chr5:98612528+98612571,98613737-98613787,98614043+98614063	C3	32	0	16.18	0	100	100	SwitchAS
Rg9mtd3	MmuEX0039579	chr4:45317136-45317260	125	chr4:45314216+45314222,45317136-45317260,45318616	S	114	13	94.24	2.06	100	97.94	SwitchAS
Sbno2	MmuEX0041090	chr10:79542698-79544127	1430	chr10:79545360,79542698-79544127,79535263	S	108	16	9.61	0	93.65	93.65	SwitchAS
Dym	MmuEX0015944	chr18:75283112-75283237	126	chr18:75278943,75283112-75283237,75358817	C2	129	2	98.41	14.75	100	85.25	SwitchAS
Glb1l2	MmuEX0020495	chr9:26604630-26604677	48	chr9:26613883,26604630-26604677,26604188	C2	52	10	9.6	0	90.83	90.83	SwitchAS
Arhgap26	MmuEX0005848	chr18:39517207-39517317	111	chr18:39466506,39517207-39517317,39522771	S	83	14	89.88	17.41	100	82.59	SwitchAS
Fam13b	MmuEX0017981	chr18:34633204-34633339	136	chr18:34646633,34633204-34633339,34624874	S	122	0	98.16	0	100	100	SwitchAS
Fam13b	MmuEX0017982	chr18:34624810-34624874	65	chr18:34633204,34624810-34624874,34622663	S	125	4	96.85	2.44	100	97.56	SwitchAS
Ppp6r2	MmuEX0036859	chr15:89073736-89073890	155	chr15:89072719,89073736-89073890,89076689	C1	109	13	94.2	1.69	100	98.31	SwitchAS
Man1b1	MmuEX0027619	chr2:25193633-25193787	155	chr2:25190012,25193633-25193787,25197127	S	123	0	97.72	2.13	100	97.87	SwitchAS
Sun1	MmuEX0045739	chr5:139709425-139709523	99	chr5:139702839,139709425-139709523,139709855	C2	134	7	96.12	3.23	100	96.77	SwitchAS
Sh3glb1	MmuEX0042195	chr3:144362818-144362841	24	chr3:144368477,144362818-144362841,144360431	S	134	19	10.56	0	90.65	90.65	SwitchAS
Atp11b	MmuEX0006757	chr3:35742493-35742618	126	chr3:35738136,35742493-35742618,35748356	C1	131	16	11.32	0	90.88	90.88	SwitchAS
Shank2	MmuEX0042252	chr7:151593961-151593981	21	chr7:151593137,151593961-151593981,151595367	S	28	18	54.39	0	100	100	SwitchAS
Smg6	MmuEX0043942	chr11:74745843-74745953	111	chr11:74739505,74745843-74745953,74795354	C3	122	10	95.08	18.37	100	81.63	SwitchAS
Ccdc155	MmuEX0009648	chr7:52448546-52448596	51	chr7:52448829,52448546-52448596,52445397	S	20	15	69	0	100	100	SwitchAS
Ccdc155	MmuEX0009649	chr7:52445320-52445397	78	chr7:52448546,52445320-52445397,52439623	C2	24	17	86.73	9.22	100	90.78	SwitchAS
Ankrd35	MmuEX0005116	chr3:96484885-96484991	107	chr3:96484620,96484885-96484991+96484998,96485950	S	35	0	96.25	0	100	100	SwitchAS
Ankrd35	MmuEX0005117	chr3:96485950-96486134	185	chr3:96484991+96484998,96485950-96486134,96493069	C2	27	0	96.21	6.07	100	93.93	SwitchAS
Ankrd35	MmuEX0005118	chr3:96486917-96486954	38	chr3:96486134,96486917-96486954,96493069	C2	22	9	94.11	16.22	100	83.78	SwitchAS
Ranbp9	MmuEX0038736	chr13:43517920-43518032	113	chr13:43520399,43517920-43518032,43516688	S	131	7	95.6	8.11	100	91.89	SwitchAS
Baiap2l1	MmuEX0007652	chr5:145079798-145079884	87	chr5:145118660,145079798-145079884,145047180	C2	66	3	96.94	17.65	100	82.35	SwitchAS
Ppp1r10	MmuEX0036666	chr17:36084977-36085040	64	chr17:36084654,36084977-36085040,36089133	C3	130	2	2.53	0	100	100	SwitchAS
Tbce	MmuEX0046558	chr13:14101896-14101998	103	chr13:14102809,14101727+14101896-14101998,14098804	C3	119	1	97.92	6.78	100	93.22	SwitchAS
Tbce	MmuEX0046560	chr13:14098055-14098119	65	chr13:14098210,14098055-14098119,14097550	S	129	3	96.97	0.83	100	99.17	SwitchAS
Neil3	MmuEX0031420	chr8:54674279-54674453	175	chr8:54684453,54674279-54674453,54672681	S	65	0	97.95	0	100	100	SwitchAS
Slc9a8	MmuEX0043636	chr2:167290841-167290957	117	chr2:167285254,167290841-167290957,167293185	C1	126	2	96.72	0	100	100	SwitchAS
Fnbp1l	MmuEX0019450	chr3:122259330-122259488	159	chr3:122260821,122259314+122259330-122259488,122252183	C1	115	12	6.99	0	87.36	87.36	SwitchAS
Fnbp1l	MmuEX0019451	chr3:122255054-122255068	15	chr3:122260821,122255054-122255068,122252183	C1	115	14	7.38	0	87.01	87.01	SwitchAS
Dnajc11	MmuEX0015163	chr4:151343955-151344077	123	chr4:151342736,151343955-151344077,151344966	S	132	9	95.23	0	100	100	SwitchAS
Dnajc11	MmuEX0015164	chr4:151344966-151345039	74	chr4:151331313,151344966-151345039,151347589	C2	135	4	97.09	4.76	100	95.24	SwitchAS
Srrm3	MmuEX0044973	chr5:136345590-136345668	79	chr5:136345164,136345590-136345668,136348950	S	32	9	8.37	0	86.58	86.58	SwitchAS
9130011E15Rik	MmuEX0002315	chr19:46010852-46010917	66	chr19:46014935,46010852-46010917,46008345	S	124	1	98.45	1.37	100	98.63	SwitchAS
Spsb1	MmuEX0044806	chr4:149283606-149283861	256	chr4:149328930+149328962,149283606-149283861,149281366	S	86	6	4.95	0	93.53	93.53	SwitchAS
Ift88	MmuEX0023759	chr14:58056064-58056120	57	chr14:58053694,58056014+58056064-58056120,58057079	S	107	2	98.06	1.33	100	98.67	SwitchAS
Scamp2	MmuEX0041134	chr9:57426081-57426209	129	chr9:57425544,57426081-57426209,57427240	S	134	1	4.66	0	98.23	98.23	SwitchAS
Slc25a28	MmuEX0042884	chr19:43741405-43741633	229	chr19:43748966,43741134+43741405-43741633,43740318	S	128	2	97.9	19.59	100	80.41	SwitchAS
Tex264	MmuEX0047035	chr9:106584199-106584494	296	chr9:106587260+106587278,106584199-106584494,106576069	S	134	7	95.75	1.89	100	98.11	SwitchAS
Ulk4	MmuEX0050574	chr9:121156001-121156029	29	chr9:121158043,121156001-121156029,121153562	S	30	17	7.83	0	82.19	82.19	SwitchAS
Nthl1	MmuEX0032515	chr17:24771670-24771840	171	chr17:24771110,24771670-24771840,24772533	S	114	4	97.68	17.91	100	82.09	SwitchAS
Stx3	MmuEX0045592	chr19:11857516-11857626	111	chr19:11859880,11857516-11857626,11856170	C1	93	18	79.3	0.38	100	99.62	SwitchAS
Stx3	MmuEX0045593	chr19:11857290-11857400	111	chr19:11859880,11857290-11857400,11851660	C3	87	14	24.29	0	99.73	99.73	SwitchAS
Plekha6	MmuEX0035726	chr1:135175950-135176030	81	chr1:135170951,135175950-135176030,135176916	C2	85	18	22.82	0	100	100	SwitchAS
Agrn	MmuEX0004311	chr4:155542655-155542678	24	chr4:155542842,155542655-155542678,155541615	C1	124	18	9.19	0	80.32	80.32	SwitchAS
2310008H04Rik	MmuEX0000860	chr16:16048097-16048197	101	chr16:16053359,16048097-16048197,16037802	S	87	18	94.1	0	100	100	SwitchAS
Uggt2	MmuEX0050480	chr14:119402048-119402208	161	chr14:119406367,119402048-119402208,119397435	C2	92	5	96.91	0	100	100	SwitchAS
Uggt2	MmuEX0050481	chr14:119400993-119401107	115	chr14:119406367,119400993-119401107,119397435	C2	94	5	97.01	0.81	100	99.19	SwitchAS
Slc35e2	MmuEX0043161	chr4:154990292-154990364	73	chr4:154989731,154990292-154990364,154991724	S	104	2	96.35	2.94	100	97.06	SwitchAS
Osbpl6	MmuEX0033233	chr2:76352127-76352213	87	chr2:76337479,76351974+76352127-76352213,76361946	S	75	3	4.42	0	99.65	99.65	SwitchAS
4933432B09Rik	MmuEX0001906	chr15:79474378-79474447	70	chr15:79479167,79474378-79474447,79473801	S	27	7	13.37	0	94.85	94.85	SwitchAS
Fam13c	MmuEX0017987	chr10:69983526-69983673	148	chr10:69961697,69983526-69983673,69997432	S	88	9	95.34	0	100	100	SwitchAS
Trp53bp1	MmuEX0049085	chr2:121034817-121035088	272	chr2:121037006,121034817-121035088,121034240	S	124	3	97.04	0	100	100	SwitchAS
Trp53bp1	MmuEX0049086	chr2:121034091-121034240	150	chr2:121034817,121034091-121034240,121033865	S	125	5	96.24	8.52	100	91.48	SwitchAS
Hjurp	MmuEX0022967	chr1:90164523-90164601	79	chr1:90165896,90164523-90164601,90163233	C1	126	15	93.72	7.84	100	92.16	SwitchAS
Slc25a26	MmuEX0042873	chr6:94463799-94464035	237	chr6:94460855,94463799-94464035,94484138	S	110	6	4.16	0	100	100	SwitchAS
Glb1	MmuEX0020479	chr9:114346857-114346978	122	chr9:114343577,114346857-114346978,114352127	C2	126	1	98.43	12.2	100	87.8	SwitchAS
Glb1	MmuEX0020480	chr9:114347059-114347099	41	chr9:114346978,114347059-114347099,114352127	S	128	2	97.76	2.78	100	97.22	SwitchAS
Eif4g1	MmuEX0016617	chr16:20674859-20674879	21	chr16:20674387,20674859-20674879,20675417	S	133	19	14.41	0	95.04	95.04	SwitchAS
Spata2	MmuEX0044544	chr2:167311932-167311992	61	chr2:167318259+167318263,167311932-167311992,167311093	C1	114	19	7.25	0	100	100	SwitchAS
Ccdc37	MmuEX0009758	chr6:90363955-90364022	68	chr6:90365694,90363955-90364022,90363869	C1	23	17	91.51	1.45	100	98.55	SwitchAS
Fam134a	MmuEX0017943	chr1:75140966-75141013	48	chr1:75140527,75140878+75140966-75141013,75141196	S	131	0	98.89	0	100	100	SwitchAS
Fam118b	MmuEX0017874	chr9:35074622-35074694	73	chr9:35075308,35074622-35074694,35052291	C1	106	7	3.05	0	83.08	83.08	SwitchAS
Grk4	MmuEX0021936	chr5:35017183-35017295	113	chr5:35011851+35011855,35017183-35017295+35017583,35018759	S	29	10	93.19	7.94	100	92.06	SwitchAS
Mast1	MmuEX0027987	chr8:87442569-87442678	110	chr8:87444259+87444293,87442569-87442678,87437402+87437406+87437427	C2	77	12	36.05	0	100	100	SwitchAS
Mast1	MmuEX0027988	chr8:87441952-87442130	179	chr8:87442569,87441952-87442130,87437402+87437406+87437427	C3	78	14	38.67	0	100	100	SwitchAS
Mast1	MmuEX0027989	chr8:87441626-87441873	248	chr8:87441952,87441626-87441873,87437402+87437406+87437427	C3	79	14	39.04	0	100	100	SwitchAS
Mast1	MmuEX0027990	chr8:87440452-87440658	207	chr8:87441626,87440452-87440658,87437402+87437406+87437427	C3	80	15	40.87	0	100	100	SwitchAS
Mast1	MmuEX0027991	chr8:87440055-87440284	230	chr8:87440452,87440055-87440284,87437402+87437406+87437427	C2	82	17	42.13	0	100	100	SwitchAS
Mast1	MmuEX0027992	chr8:87439579-87439701	123	chr8:87440055,87439579-87439701,87437402+87437406+87437427	C3	79	11	39.84	0	100	100	SwitchAS
Mast1	MmuEX0027993	chr8:87439354-87439490	137	chr8:87439579,87439354-87439490,87437402+87437406+87437427	C1	78	12	39.9	0	100	100	SwitchAS
Nebl	MmuEX0031345	chr2:17292086-17292178	93	chr2:17295812,17292086-17292178,17272438	C1	52	6	8.11	0	99.08	99.08	SwitchAS
Nebl	MmuEX0031346	chr2:17291156-17291305	150	chr2:17295812,17291156-17291305,17272438	C1	54	2	7.98	0	100	100	SwitchAS
Tmem62	MmuEX0048029	chr2:120816067-120816222	156	chr2:120812694,120816067-120816222,120822142	C3	104	10	96.04	18.92	100	81.08	SwitchAS
Fam73a	MmuEX0018454	chr3:151960081-151960181	101	chr3:151980578,151960081-151960181,151953873	S	96	0	97.89	0	100	100	SwitchAS
Fam73a	MmuEX0018455	chr3:151953755-151953873	119	chr3:151960081,151953755-151953873,151952106	C2	85	13	93.62	0	100	100	SwitchAS
Tns1	MmuEX0048419	chr1:73982906-73982929	24	chr1:73983799,73982906-73982929,73974684	C1	109	16	8.37	0	82.21	82.21	SwitchAS
Cd47	MmuEX0010233	chr16:49899969-49900013	45	chr16:49898245,49899969-49900013,49906894	S	135	10	3.48	0	88.95	88.95	SwitchAS
Aasdh	MmuEX0002905	chr5:77330943-77331210	268	chr5:77333234+77333283,77330943-77331210,77330306	S	93	9	96.8	4.23	100	95.77	SwitchAS
Cep70	MmuEX0011013	chr9:99154674-99154796	123	chr9:99146785,99154674-99154796,99162965	S	102	12	93.44	0	100	100	SwitchAS
Myh4	MmuEX0030360	chr11:67069689-67069997	309	chr11:67065450,67069689-67069997,67110948	C3	26	12	90.24	8.77	100	91.23	SwitchAS
Myh4	MmuEX0030367	chr11:67067502-67067628	127	chr11:67065450,67067502-67067628,67110948	C3	26	19	90	11.86	100	88.14	SwitchAS
Myh4	MmuEX0030368	chr11:67067960-67068078	119	chr11:67065450,67067960-67068078,67110948	C3	26	15	89.54	7.96	100	92.04	SwitchAS
Myh4	MmuEX0030371	chr11:67069070-67069235	166	chr11:67065450,67069070-67069235,67110948	C3	27	19	89.93	9.57	100	90.43	SwitchAS
Aak1	MmuEX0002873	chr6:86931290-86931391	102	chr6:86917367,86931290-86931391,86945834	C3	108	19	20.09	0	97.88	97.88	SwitchAS
Aak1	MmuEX0002875	chr6:86933806-86933916	111	chr6:86917367,86933806-86933916,86945834	C3	109	10	20.8	0	97.59	97.59	SwitchAS
Aak1	MmuEX0002876	chr6:86936264-86936368	105	chr6:86917367,86936258+86936264-86936368,86945834	C3	109	16	20.87	0	97.41	97.41	SwitchAS
Aak1	MmuEX0002877	chr6:86937198-86945058	7861	chr6:86917367,86937198-86945058,86945834	C3	109	15	16.52	0	95.67	95.67	SwitchAS
Dhps	MmuEX0014493	chr8:87597194-87597315	122	chr8:87596515,87597194-87597315,87597580	C3	126	4	96.04	0	100	100	SwitchAS
Dhps	MmuEX0014494	chr8:87597402-87597498	97	chr8:87596515,87597402-87597498,87597580	C2	131	4	97.47	13.04	100	86.96	SwitchAS
Taok3	MmuEX0046285	chr5:117656656-117656769	114	chr5:117654404,117656656-117656769,117665358	C3	114	3	98.27	7.32	100	92.68	SwitchAS
Dot1l	MmuEX0015544	chr10:80253356-80254306	951	chr10:80253129,80253356-80254306,80256252	C2	125	4	97.51	18.52	100	81.48	SwitchAS
Slc25a3	MmuEX0042888	chr10:90584952-90585076	125	chr10:90586303,90584952-90585076,90582451	C3	138	16	10.75	0	99.91	99.91	SwitchAS
Slc25a3	MmuEX0042889	chr10:90584667-90584788	122	chr10:90586303,90584667-90584788,90582451	C3	139	13	91.23	0.44	100	99.56	SwitchAS
Kcnma1	MmuEX0025093	chr14:24210143-24210229	87	chr14:24255163+24255172,24210143-24210229,24205575	C3	48	8	3.88	0	82.98	82.98	SwitchAS
Ifi27l1	MmuEX0023615	chr12:104675886-104675915	30	chr12:104673783,104675886-104675915,104677611	C2	120	5	95.79	0	100	100	SwitchAS
Fbxl18	MmuEX0018781	chr5:143647218-143648761	1544	chr5:143650348,143647218-143648761+143649126+143649154+143649173,143640555	S	101	9	95.21	5.88	100	94.12	SwitchAS
Il3ra	MmuEX0024017	chr14:15184431-15184533	103	chr14:15183678,15184431-15184533,15187521	C1	83	19	93.19	0	100	100	SwitchAS
Csde1	MmuEX0012851	chr3:102840498-102840644	147	chr3:102833135,102840498-102840644,102842615	S	136	12	6.93	0	91.77	91.77	SwitchAS
Dap3	MmuEX0013751	chr3:88734834-88734942	109	chr3:88737487,88734834-88734942,88733448	C3	137	1	97.81	1.82	100	98.18	SwitchAS
Dap3	MmuEX0013752	chr3:88734398-88734490	93	chr3:88734834,88734398-88734490,88733448	S	137	2	97.77	5.26	100	94.74	SwitchAS
Eif2s3y	MmuEX0016561	chrY:356429-356598	170	chrY:353951+353956,356429-356598,359549+359745	S	103	1	97.2	3.03	100	96.97	SwitchAS
Msi2	MmuEX0029827	chr11:88162286-88162440	155	chr11:88180287,88162286-88162440+88162494,88158162	C3	127	14	94.82	11.48	100	88.52	SwitchAS
Sp140	MmuEX0044464	chr1:87524753-87524833	81	chr1:87516732,87524753-87524833,87529053	C3	48	8	7.88	0	92.63	92.63	SwitchAS
Ntn5	MmuEX0032526	chr7:52946782-52946931	150	chr7:52946605,52946782-52946931,52949344+52949366	C3	26	12	72.34	0	100	100	SwitchAS
Ntn5	MmuEX0032527	chr7:52947254-52947307	54	chr7:52946931,52947254-52947307,52949344+52949366	C3	26	15	72.22	1.38	100	98.62	SwitchAS
Rabepk	MmuEX0038420	chr2:34650692-34650849	158	chr2:34652891+34652895,34650692-34650849,34646087+34646175	S	127	6	95.36	1.27	100	98.73	SwitchAS
Csf2rb2	MmuEX0012875	chr15:78124772-78124959	188	chr15:78127406,78124772-78124959,78123295	S	33	18	89.84	10.77	100	89.23	SwitchAS
Phf20l1	MmuEX0034754	chr15:66464382-66464463	82	chr15:66462528+66462607,66464268+66464382-66464463,66468246	S	119	1	97.84	0	100	100	SwitchAS
H2-Q6	MmuEX0022293	chr17:35564916-35565084	169	chr17:35480333,35564809+35564916-35565084+35565093,35565505	C3	121	2	96.69	7.76	100	92.24	SwitchAS
Ddi2	MmuEX0014028	chr4:141248170-141248359	190	chr4:141251322,141248170-141248359,141241546	C2	134	5	97.13	11.43	100	88.57	SwitchAS
Ly6c1	MmuEX0027339	chr15:74942028-74942110	83	chr15:75069464,74942028-74942110+74942125,74878954+74878969	S	109	5	2.79	0	92.52	92.52	SwitchAS
Gm2792	MmuEX0021054	chr17:6517690-6517833	144	chr17:6522882,6517690-6517833,6375485	C1	81	4	97.8	6.25	100	93.75	SwitchAS
Pparg	MmuEX0036467	chr6:115402263-115402371	109	chr6:115401100,115402263-115402371,115413104	S	68	6	4.07	0	93.44	93.44	SwitchAS
Myo18a	MmuEX0030448	chr11:77628136-77628213	78	chr11:77591816,77628136-77628213,77629358	C3	113	8	4.51	0	86.49	86.49	SwitchAS
Rmnd5b	MmuEX0039949	chr11:51442978-51443163	186	chr11:51449092,51442978-51443163,51441527	S	131	0	98.46	2.22	100	97.78	SwitchAS
Pcnt	MmuEX0034010	chr10:75869437-75869469	33	chr10:75871443,75869437-75869469,75867396	S	103	8	5.15	0	95.61	95.61	SwitchAS
Itgb7	MmuEX0024686	chr15:102046903-102047063	161	chr15:102047323,102046903-102047063,102046698	S	72	10	94.32	3.43	100	96.57	SwitchAS
Gtf2h4	MmuEX0022101	chr17:35807135-35807203	69	chr17:35807310,35807135-35807203,35806976	S	125	1	99	5.74	100	94.26	SwitchAS
Nom1	MmuEX0031984	chr5:29762787-29762887	101	chr5:29762597,29762787-29762887+29763585,29764137	S	127	2	2.29	0	100	100	SwitchAS
Kcnh6	MmuEX0025044	chr11:105888030-105888186	157	chr11:105887192,105888030-105888186,105888871	S	31	13	93.74	11.7	100	88.3	SwitchAS
Kcnh6	MmuEX0025045	chr11:105888871-105889051	181	chr11:105888186,105888871-105889051,105894319	C2	28	4	96.62	14.65	100	85.35	SwitchAS
Ift46	MmuEX0023696	chr9:44597974-44598059	86	chr9:44597710,44597974-44598059,44598568	S	138	1	98.6	19.17	100	80.83	SwitchAS
Paxip1	MmuEX0033812	chr5:28070797-28070872	76	chr5:28070961,28070797-28070872,28070715	S	130	2	97.43	3.47	100	96.53	SwitchAS
2310045N01Rik	MmuEX0000937	chr8:72669710-72669789	80	chr8:72669033,72669710-72669789,72688128	C2	132	5	97.79	3.85	100	96.15	SwitchAS
Tsc2	MmuEX0049259	chr17:24741773-24741937	165	chr17:24744382,24741773-24741937,24741603	C2	125	0	99.11	2.41	100	97.59	SwitchAS
Tpra1	MmuEX0048637	chr6:88860791-88860871	81	chr6:88860644,88860791-88860871,88861677	S	130	2	98.48	0	100	100	SwitchAS
Arrdc2	MmuEX0006268	chr8:73361009-73361265	257	chr8:73361343,73361009-73361265,73360919	S	113	0	98.87	0	100	100	SwitchAS
Mical3	MmuEX0028978	chr6:120972244-120972306	63	chr6:120972402,120972244-120972306,120971374	S	121	0	98.89	0	100	100	SwitchAS
Brd8	MmuEX0008224	chr18:34760261-34760502	242	chr18:34761857,34760261-34760502+34760562,34759895	C1	128	5	4.16	0	86.81	86.81	SwitchAS
Ssbp2	MmuEX0045018	chr13:91823287-91823322	36	chr13:91820243,91823287-91823322,91824816	S	112	0	98.98	0	100	100	SwitchAS
Fgfr4	MmuEX0019173	chr13:55268761-55268898	138	chr13:55268519,55268761-55268898,55269167	S	41	7	93.34	0	100	100	SwitchAS
Wbscr22	MmuEX0051748	chr5:135539754-135539791	38	chr5:135539884,135539754-135539791,135537214	S	128	1	98.75	6.34	100	93.66	SwitchAS
Pafah1b3	MmuEX0033465	chr7:26082391-26082489	99	chr7:26082862,26082391-26082489,26082194	S	119	2	98.67	3.79	100	96.21	SwitchAS
Usp40	MmuEX0051016	chr1:89850587-89850626	40	chr1:89850726,89850587-89850626,89849033	S	102	13	6.78	0	80.47	80.47	SwitchAS
Gtpbp3	MmuEX0022166	chr8:74014965-74015108	144	chr8:74014866,74014965-74015108,74015324	C1	121	19	93.24	0	100	100	SwitchAS
4930432K21Rik	MmuEX0001512	chr8:86683344-86683506	163	chr8:86672784,86683344-86683506,86685112	C1	32	9	96.28	13.93	100	86.07	SwitchAS
Clstn3	MmuEX0011795	chr6:124382705-124382943	239	chr6:124386836,124382705-124382943,124382178	S	64	19	11.3	0	93.76	93.76	SwitchAS
Fpgs	MmuEX0019592	chr2:32542665-32542742	78	chr2:32542933,32542665-32542742,32542405	S	122	1	98.93	7.16	100	92.84	SwitchAS
Bcr	MmuEX0007891	chr10:74636426-74636912	487	chr10:74630983,74634080+74636426-74636912,74638022	S	127	19	8.99	0	90.51	90.51	SwitchAS
Asz1	MmuEX0006514	chr6:18005435-18005540	106	chr6:18021965,18005435-18005540,18004641	S	20	0	94.34	9.43	100	90.57	SwitchAS
Asz1	MmuEX0006515	chr6:18004528-18004641	114	chr6:18005435,18004528-18004641,18001403	S	21	0	94.67	5.08	100	94.92	SwitchAS
Kdelr3	MmuEX0025252	chr15:79356097-79356349	253	chr15:79355392,79356097-79356349,79357502	S	93	0	98.53	0	100	100	SwitchAS
D16H22S680E	MmuEX0013487	chr16:18312732-18312851	120	chr16:18316739,18312732-18312851,18311076	S	127	0	98.97	1.23	100	98.77	SwitchAS
Nit1	MmuEX0031780	chr1:173273569-173273694	126	chr1:173273825,173273569-173273694,173272928	S	132	0	98.93	0.43	100	99.57	SwitchAS
Pigl	MmuEX0035057	chr11:62321229-62321296	68	chr11:62317271,62321229-62321296,62323322	S	79	3	97.56	8.8	100	91.2	SwitchAS
Sirt2	MmuEX0042453	chr7:29570825-29570901	77	chr7:29570738,29570825-29570901,29570984	S	133	0	99.16	6.53	100	93.47	SwitchAS
Sirt2	MmuEX0042454	chr7:29572602-29572672	71	chr7:29571035,29572602-29572672,29572781	S	134	0	99.17	1.72	100	98.28	SwitchAS
Fam116b	MmuEX0017847	chr15:89015968-89016077	110	chr15:89016424,89015968-89016077,89015894	S	108	0	98.75	0	100	100	SwitchAS
Med24	MmuEX0028531	chr11:98577728-98577839	112	chr11:98579224,98577728-98577839,98577595	C1	129	0	99.24	5.03	100	94.97	SwitchAS
Acot8	MmuEX0003516	chr2:164620485-164620679	195	chr2:164621152,164620485-164620679,164618510	S	129	5	97.33	14.3	100	85.7	SwitchAS
Ddx27	MmuEX0014080	chr2:166846128-166846214	87	chr2:166846043,166846128-166846214,166847548	S	128	0	99.14	3.5	100	96.5	SwitchAS
Kdm6b	MmuEX0025356	chr11:69222166-69222283	118	chr11:69227035,69222166-69222283,69221903	C1	116	1	97.38	2.82	100	97.18	SwitchAS
Mb	MmuEX0028060	chr15:76852919-76853021	103	chr15:76880955,76852919-76853021,76848228	S	26	19	86.13	11.83	100	88.17	SwitchAS
Trdn	MmuEX0048804	chr10:32977893-32977946	54	chr10:32976943,32977893-32977946,32989471	C3	27	0	74.04	0	100	100	SwitchAS
Trdn	MmuEX0048807	chr10:32895575-32895634	60	chr10:32878084,32895575-32895634,32903760	S	27	0	92.31	3.2	100	96.8	SwitchAS
Trdn	MmuEX0048808	chr10:32919969-32920028	60	chr10:32915931,32919969-32920028,32953661	S	23	17	86.83	3.37	100	96.63	SwitchAS
D10Bwg1379e	MmuEX0013455	chr10:18314714-18314835	122	chr10:18317134,18314714-18314835,18312148	S	45	0	97.18	2.72	100	97.28	SwitchAS
Kitl	MmuEX0025666	chr10:99539369-99539539	171	chr10:99538930,99539369-99539539,99542608	C3	89	15	90.1	4.25	100	95.75	SwitchAS
Stx7	MmuEX0045607	chr10:23896972-23897041	70	chr10:23875190,23896972-23897041,23898923	S	131	0	99.03	9.61	100	90.39	SwitchAS
Mdm1	MmuEX0028317	chr10:117599555-117599674	120	chr10:117596825,117599555-117599674,117601257	S	103	0	0.96	0	97.06	97.06	SwitchAS
Smtn	MmuEX0044004	chr11:3425045-3425209	165	chr11:3426168,3425045-3425209,3424948	C1	117	15	92.77	8.68	100	91.32	SwitchAS
Smtn	MmuEX0044005	chr11:3424886-3424948	63	chr11:3425045,3424886-3424948,3424729	C1	115	15	92.55	6.61	100	93.39	SwitchAS
Rock2	MmuEX0040278	chr12:16989457-16989553	97	chr12:16984908,16989457-16989553,16991444	S	130	8	3.2	0	87.73	87.73	SwitchAS
Slc25a19	MmuEX0042846	chr11:115482862-115483027	166	chr11:115485186,115482862-115483027+115483202,115482361	S	127	10	5.06	0	83.33	83.33	SwitchAS
Unk	MmuEX0050667	chr11:115899854-115900097	244	chr11:115891805,115899854-115900097,115908991	C1	115	10	6.61	0	100	100	SwitchAS
Ywhae	MmuEX0052603	chr11:75576200-75576244	45	chr11:75572930,75576200-75576244,75578122	S	139	5	2.49	0	83.17	83.17	SwitchAS
Dpf3	MmuEX0015566	chr12:84432850-84432977	128	chr12:84451775,84432850-84432977,84426020	S	74	4	97.53	9.41	100	90.59	SwitchAS
Cdc42bpb	MmuEX0010403	chr12:112547674-112547724	51	chr12:112549698,112547674-112547724,112546408	S	126	9	4.92	0	93.04	93.04	SwitchAS
Zfyve21	MmuEX0053792	chr12:113065754-113065896	143	chr12:113063319,113065754-113065896,113066029	S	128	3	98.31	11.76	100	88.24	SwitchAS
Ryr2	MmuEX0040863	chr13:11739969-11740004	36	chr13:11741997,11739969-11740004,11738872	S	28	11	20	0	96.91	96.91	SwitchAS
Kif13a	MmuEX0025408	chr13:46855632-46855673	42	chr13:46856032,46855632-46855673,46848241	C3	118	8	4.26	0	87.24	87.24	SwitchAS
Nsd1	MmuEX0032404	chr13:55365752-55365800	49	chr13:55364803,55365752-55365800,55369809	S	109	2	1.62	0	97.44	97.44	SwitchAS
Mterfd1	MmuEX0029963	chr13:67032542-67032594	53	chr13:67033871,67032542-67032594,67031159	C2	126	3	5.52	0	94.5	94.5	SwitchAS
Agtpbp1	MmuEX0004324	chr13:59595040-59595231	192	chr13:59596694,59595040-59595231,59583965	C1	123	5	4.41	0	92.11	92.11	SwitchAS
Atp8a2	MmuEX0006947	chr14:60273386-60273477	92	chr14:60303752,60273386-60273477,60266761	S	64	0	98.42	0	100	100	SwitchAS
Mtmr6	MmuEX0030102	chr14:60909543-60909656	114	chr14:60908514,60909543-60909656,60910831	S	124	4	4.83	0	98.38	98.38	SwitchAS
Diap3	MmuEX0014662	chr14:87305744-87305845	102	chr14:87309836,87305744-87305845,87266449	S	62	3	96.44	8.06	100	91.94	SwitchAS
Pibf1	MmuEX0035000	chr14:99641716-99641814	99	chr14:99620862,99641716-99641814,99642058	C1	111	3	2.8	0	91.09	91.09	SwitchAS
Scel	MmuEX0041190	chr14:103974126-103974152	27	chr14:103973653,103974126-103974152,103975409	S	21	10	7.2	0	86.45	86.45	SwitchAS
Lrrc6	MmuEX0027062	chr15:66301379-66301551	173	chr15:66312803,66301379-66301551,66285857	S	21	0	94.92	3.44	100	96.56	SwitchAS
Rangap1	MmuEX0038739	chr15:81556504-81556712	209	chr15:81560142,81556504-81556712,81555062	C1	127	2	2.54	0	93.23	93.23	SwitchAS
Dmc1	MmuEX0014852	chr15:79426674-79426756	83	chr15:79430476,79426674-79426756,79423617	C1	22	0	93.64	0.85	100	99.15	SwitchAS
Nell2	MmuEX0031489	chr15:95177193-95177318	126	chr15:95205159,95177193-95177318,95129411	S	45	0	97.61	0	100	100	SwitchAS
0610037P05Rik	MmuEX0000063	chr16:14313354-14313493	140	chr16:14313909,14313354-14313493,14311224	C1	135	1	1.03	0	82.14	82.14	SwitchAS
Usp25	MmuEX0050891	chr16:77097894-77098007	114	chr16:77093987,77097894-77098007,77099896	C3	118	11	7.26	0	96.72	96.72	SwitchAS
Usp25	MmuEX0050892	chr16:77099896-77099991	96	chr16:77098007,77099896-77099991,77108130	C3	117	9	5.95	0	95.86	95.86	SwitchAS
Parp9	MmuEX0033751	chr16:35964061-35964450	390	chr16:35960147,35964061-35964450,35967736	S	95	0	98.57	6.67	100	93.33	SwitchAS
Lmbr1l	MmuEX0026584	chr15:98739819-98739887	69	chr15:98741927,98739819-98739887,98739698	S	120	2	98.07	0.94	100	99.06	SwitchAS
Dip2b	MmuEX0014709	chr15:100038189-100038263	75	chr15:100036885,100036828+100038189-100038263,100040010	S	114	4	97.68	0	100	100	SwitchAS
Cela1	MmuEX0010724	chr15:100512225-100512329	105	chr15:100513318,100512225-100512329,100511719	S	70	11	6.74	0	95.48	95.48	SwitchAS
Leprel2	MmuEX0026315	chr6:124804600-124804750	151	chr6:124804866,124804600-124804750,124804470	C3	78	15	6.81	0	85.42	85.42	SwitchAS
Taf8	MmuEX0046224	chr17:47627092-47627231	140	chr17:47630511,47627092-47627231,47626845	S	113	14	93.59	0	100	100	SwitchAS
Birc6	MmuEX0008014	chr17:75088558-75088703	146	chr17:75081766,75088558-75088703,75089698	C3	124	16	91.53	13.78	100	86.22	SwitchAS
Ttc27	MmuEX0049496	chr17:75146992-75147104	113	chr17:75142391,75146992-75147104,75150402	S	117	3	98.3	0	100	100	SwitchAS
Ttc27	MmuEX0049497	chr17:75150402-75150468	67	chr17:75147104,75150402-75150468,75169583	S	123	1	98.55	0	100	100	SwitchAS
Nrxn1	MmuEX0032370	chr17:90988011-90988201	191	chr17:90989188,90988011-90988201,90964818	S	34	0	96.87	1	100	99	SwitchAS
Sos1	MmuEX0044416	chr17:80859262-80859387	126	chr17:80879177,80859262-80859387,80854523	S	80	19	92.85	14.29	100	85.71	SwitchAS
Map4k3	MmuEX0027783	chr17:80994196-80994285	90	chr17:80996893,80994196-80994285,80992499	S	123	8	6.77	0	87.07	87.07	SwitchAS
Thada	MmuEX0047156	chr17:84851049-84851236	188	chr17:84853949,84851049-84851236,84847379	S	71	1	96.75	0	100	100	SwitchAS
Sil1	MmuEX0042398	chr18:35592118-35592205	88	chr18:35597921,35592118-35592205,35577849	S	134	4	2.8	0	86.21	86.21	SwitchAS
Aif1	MmuEX0004405	chr17:35308708-35308749	42	chr17:35309073,35308708-35308749,35308521	S	77	3	97.39	1.2	100	98.8	SwitchAS
Diap1	MmuEX0014633	chr18:38007600-38007658	59	chr18:38011205,38007600-38007658,38005152	S	128	4	2.95	0	94.24	94.24	SwitchAS
Tjp2	MmuEX0047392	chr19:24196515-24196648	134	chr19:24196753,24196515-24196648,24195393	S	119	6	96.31	8.38	100	91.62	SwitchAS
Slc29a2	MmuEX0043016	chr19:5027025-5027159	135	chr19:5026497,5027025-5027159+5027440,5027343	S	95	1	98.83	11.34	100	88.66	SwitchAS
Cpt1a	MmuEX0012619	chr19:3368855-3369050	196	chr19:3366417,3368855-3369050,3370707	S	125	0	99.2	0	100	100	SwitchAS
Cpt1a	MmuEX0012621	chr19:3352485-3352624	140	chr19:3349342,3352485-3352624,3356317	S	124	0	99.07	2.78	100	97.22	SwitchAS
Fibp	MmuEX0019243	chr19:5464334-5464431	98	chr19:5464215,5464334-5464431,5464925	S	137	9	96.27	2.22	100	97.78	SwitchAS
Sorbs1	MmuEX0044356	chr19:40384071-40384823	753	chr19:40386159,40384071-40384823,40374792	C3	126	15	8.9	0	98.98	98.98	SwitchAS
Sfxn2	MmuEX0041987	chr19:46665983-46666032	50	chr19:46665660,46665983-46666032,46666790	S	91	1	97.96	0	100	100	SwitchAS
Cbr2	MmuEX0009379	chr11:120592320-120592417	98	chr11:120593235,120592320-120592417,120592213	S	74	0	98.5	0	100	100	SwitchAS
Parp6	MmuEX0033730	chr9:59487571-59487619	49	chr9:59485508,59487571-59487619,59487847	C1	128	5	95.99	2.03	100	97.97	SwitchAS
Flnb	MmuEX0019333	chr14:8718540-8718637	98	chr14:8717261,8718540-8718637,8720051	S	108	18	13.26	0	100	100	SwitchAS
Pias2	MmuEX0034987	chr18:77368789-77368862	74	chr18:77367800,77368789-77368862,77371830	S	130	1	98.48	8.94	100	91.06	SwitchAS
Tspan4	MmuEX0049354	chr7:148668386-148668465	80	chr7:148661396,148668386-148668465,148675451	C1	109	4	96.91	4.72	100	95.28	SwitchAS
Cnksr2	MmuEX0011876	chrX:154428040-154428127	88	chrX:154431663,154428040-154428127,154425631	C3	31	6	89.93	0	100	100	SwitchAS
Pdia4	MmuEX0034251	chr6:47758174-47758342	169	chr6:47763216,47758174-47758342,47757210	S	133	0	98.74	4.34	100	95.66	SwitchAS
Uimc1	MmuEX0050521	chr13:55194488-55194642	155	chr13:55201558,55194488-55194642,55187055	S	111	0	97.39	2.33	100	97.67	SwitchAS
Sntg1	MmuEX0044181	chr1:8772844-8772978	135	chr1:8793998,8772844-8772978,8672110	S	20	5	90.28	0	100	100	SwitchAS
Dst	MmuEX0015739	chr1:34171394-34171486	93	chr1:34170867,34171394-34171486,34172963	S	69	7	4.97	0	94.13	94.13	SwitchAS
Fn1	MmuEX0019421	chr1:71639645-71639809	165	chr1:71642238,71639645-71639809,71637466	S	127	6	97.25	17.43	100	82.57	SwitchAS
Capn10	MmuEX0009055	chr1:94841594-94841855	262	chr1:94841474,94841594-94841855,94843351	S	124	1	98.57	0	100	100	SwitchAS
Cln8	MmuEX0011750	chr8:14890492-14890623	132	chr8:14889118,14890492-14890623,14894572	S	120	6	4.82	0	89.47	89.47	SwitchAS
Lpgat1	MmuEX0026696	chr1:193601904-193602026	123	chr1:193600308,193601904-193602026,193602262	S	128	7	5.5	0	90.73	90.73	SwitchAS
Uhmk1	MmuEX0050498	chr1:172135246-172135334	89	chr1:172137245,172135246-172135334,172130144	S	119	6	96	0	100	100	SwitchAS
Pkn3	MmuEX0035436	chr2:29944216-29944292	77	chr2:29944102,29944216-29944292,29945359	S	72	0	98.05	1.41	100	98.59	SwitchAS
Ddx31	MmuEX0014082	chr2:28719236-28719295	60	chr2:28716412,28719236-28719295,28729651	S	104	0	98.85	0	100	100	SwitchAS
Notch1	MmuEX0032038	chr2:26317668-26318009	342	chr2:26319230,26317668-26318009,26310484	C3	117	16	87.46	0.95	100	99.05	SwitchAS
2010317E24Rik	MmuEX0000755	chr2:25231488-25231595	108	chr2:25231351,25231488-25231595,25231684	S	69	0	98.26	0	100	100	SwitchAS
Cwc22	MmuEX0013225	chr2:77781167-77781605	439	chr2:77784207,77781167-77781605,77778419	C3	99	8	5.8	0	88.04	88.04	SwitchAS
Zfp385b	MmuEX0053282	chr2:77558609-77558756	148	chr2:77654609,77558609-77558756,77557843	S	21	0	94.57	0	100	100	SwitchAS
Lass6	MmuEX0026173	chr2:68943800-68943823	24	chr2:68943216,68943800-68943823,68946499	S	88	15	22.5	0	100	100	SwitchAS
Nat10	MmuEX0030917	chr2:103572130-103572204	75	chr2:103572311,103572130-103572204+103572225,103571580	S	124	0	98.88	3.22	100	96.78	SwitchAS
Frmd5	MmuEX0019636	chr2:121399281-121399404	124	chr2:121402058,121399281-121399404,121394716	S	42	0	95.32	1.85	100	98.15	SwitchAS
Lrp4	MmuEX0026886	chr2:91349814-91349875	62	chr2:91348767,91349814-91349875,91351586	S	80	6	4.74	0	83.76	83.76	SwitchAS
Ubr1	MmuEX0050310	chr2:120749112-120749195	84	chr2:120749868,120749112-120749195,120747732	C3	98	3	3.62	0	100	100	SwitchAS
Acoxl	MmuEX0003532	chr2:127737166-127737200	35	chr2:127723258,127737166-127737200+127798384,127798268	C3	20	10	37.01	0	100	100	SwitchAS
Sec23b	MmuEX0041470	chr2:144400403-144400483	81	chr2:144398338,144400403-144400483,144404068	S	129	1	99.27	10.34	100	89.66	SwitchAS
Fam110a	MmuEX0017814	chr2:151798076-151798226	151	chr2:151799035,151798076-151798226,151796660	C3	106	12	6.05	0	88.66	88.66	SwitchAS
Necab3	MmuEX0031377	chr2:154372537-154372616	80	chr2:154372773,154372537-154372616,154372459	S	39	3	96.69	0	100	100	SwitchAS
Epb4.1l1	MmuEX0016984	chr2:156349397-156349507	111	chr2:156339946,156349397-156349507,156350617	C1	113	12	4.96	0	82.42	82.42	SwitchAS
Nbea	MmuEX0030985	chr3:55454013-55454075	63	chr3:55469496,55454013-55454075,55453689	S	90	13	7.24	0	100	100	SwitchAS
Ndst3	MmuEX0031267	chr3:123322001-123322115	115	chr3:123322217,123322001-123322115,123309949	C3	25	4	7.24	0	91.85	91.85	SwitchAS
Polr3c	MmuEX0036319	chr3:96527720-96527975	256	chr3:96529757,96527720-96527975,96527622	S	132	1	98.72	0	100	100	SwitchAS
Coro2a	MmuEX0012474	chr4:46577560-46577733	174	chr4:46614689,46577560-46577733,46575967	C1	66	0	7.91	0	100	100	SwitchAS
Astn2	MmuEX0006496	chr4:65720164-65720271	108	chr4:65780091,65720164-65720271,65653468	C2	43	2	96.89	6.98	100	93.02	SwitchAS
Clta	MmuEX0011796	chr4:44043087-44043140	54	chr4:44038432,44043087-44043140,44045273	C1	138	18	11.92	0	90.1	90.1	SwitchAS
Bnc2	MmuEX0008086	chr4:84201683-84201808	126	chr4:84256013,84201683-84201808,84192309	C2	33	12	91.84	9.8	100	90.2	SwitchAS
Ccdc23	MmuEX0009709	chr4:118868332-118868380	49	chr4:118868091,118868332-118868380,118868477	S	125	13	8.49	0	97.35	97.35	SwitchAS
Macf1	MmuEX0027455	chr4:123169884-123170062	179	chr4:123170329,123169884-123170062,123169075	S	98	0	98.94	4.89	100	95.11	SwitchAS
Macf1	MmuEX0027464	chr4:123071313-123071519	207	chr4:123072249,123071313-123071519,123068413	S	123	1	99.22	16.01	100	83.99	SwitchAS
Bai2	MmuEX0007629	chr4:129690737-129690887	151	chr4:129689820,129690737-129690887,129691066	S	55	9	95.75	11.76	100	88.24	SwitchAS
Yars	MmuEX0052495	chr4:128880024-128880089	66	chr4:128878099,128880024-128880089,128883373	S	135	3	2.26	0	93.87	93.87	SwitchAS
Cdk14	MmuEX0010551	chr5:4922127-4922175	49	chr5:4949532,4922127-4922175,4894167	S	79	1	98.58	14.29	100	85.71	SwitchAS
Morn1	MmuEX0029439	chr4:154464992-154465102	111	chr4:154463693,154464992-154465102,154466378	S	63	6	94.39	0	100	100	SwitchAS
Plch2	MmuEX0035628	chr4:154372562-154372669	108	chr4:154372960,154372562-154372669,154370399	S	51	0	97.98	0	100	100	SwitchAS
Krtcap3	MmuEX0025942	chr5:31555268-31555375	108	chr5:31555162,31555268-31555375,31555471	C2	69	0	98.44	0	100	100	SwitchAS
Zcchc4	MmuEX0052813	chr5:53175228-53175346	119	chr5:53174453,53175228-53175346,53176337	S	76	13	93.22	15.56	100	84.44	SwitchAS
Mtf2	MmuEX0029975	chr5:108496479-108496591	113	chr5:108494984,108496479-108496591,108498181	C3	106	17	7.74	0	100	100	SwitchAS
Slc10a6	MmuEX0042539	chr5:104047375-104047493	119	chr5:104059692,104047375-104047493,104046738	C3	26	0	95.97	0	100	100	SwitchAS
Pxn	MmuEX0038107	chr5:115998291-115999121	831	chr5:115996957,115998291-115999121,116001497	C3	128	17	8.36	0	81.46	81.46	SwitchAS
Tfpi2	MmuEX0047072	chr6:3915357-3915539	183	chr6:3917868,3915357-3915539,3913976	C1	41	17	89.15	0	100	100	SwitchAS
Cntn3	MmuEX0011980	chr6:102387797-102387923	127	chr6:102414523,102370247+102387797-102387923,102370422	C1	24	4	95.71	13.54	100	86.46	SwitchAS
Cntn3	MmuEX0011981	chr6:102158053-102158202	150	chr6:102158308,102158053-102158202,102156591	C1	23	4	89.12	2.2	100	97.8	SwitchAS
Cntn3	MmuEX0011986	chr6:102287292-102287387	96	chr6:102370247,102219098+102287292-102287387,102228475	C2	22	14	88.13	2.4	100	97.6	SwitchAS
Abtb1	MmuEX0003335	chr6:88789179-88789224	46	chr6:88789325,88789179-88789224,88788955	S	128	2	97.98	2.9	100	97.1	SwitchAS
Cops7a	MmuEX0012435	chr6:124914742-124914946	205	chr6:124915420,124914742-124914946,124912715	C1	130	3	97.2	3.4	100	96.6	SwitchAS
5730419I09Rik	MmuEX0001997	chr6:143014706-143014738	33	chr6:143015576,143014706-143014738,143010381	S	111	18	10.05	0	88.29	88.29	SwitchAS
Ing4	MmuEX0024145	chr6:124997920-124997958	39	chr6:124997605,124997811+124997920-124997958,124998194	S	58	2	97.84	5.59	100	94.41	SwitchAS
Rasgrp4	MmuEX0038929	chr7:29930827-29931102	276	chr7:29930267,29930827-29931102,29933386	S	57	0	98.04	0	100	100	SwitchAS
Ryr1	MmuEX0040838	chr7:29790514-29790670	157	chr7:29793403,29790514-29790670,29789866	S	68	3	97.82	17.24	100	82.76	SwitchAS
Aldoa	MmuEX0004620	chr7:133951198-133951353	156	chr7:133951610,133951198-133951353,133944508	S	50	6	97.09	18.92	100	81.08	SwitchAS
Aldoa	MmuEX0004621	chr7:133941488-133941640	153	chr7:133942559,133941488-133941640,133941290	C2	138	4	4.45	0	85.05	85.05	SwitchAS
Lcmt1	MmuEX0026221	chr7:130554238-130554340	103	chr7:130547998,130554238-130554340,130561732	S	129	0	98.23	0	100	100	SwitchAS
Nomo1	MmuEX0031988	chr7:53296839-53296939	101	chr7:53293958,53296839-53296939,53297902	S	126	0	99.25	7.33	100	92.67	SwitchAS
Otud5	MmuEX0033321	chrX:7450966-7451079	114	chrX:7450881,7450966-7451079,7451359	C1	134	3	95.94	3.51	100	96.49	SwitchAS
Pim2	MmuEX0035204	chrX:7455810-7455919	110	chrX:7455682,7455810-7455919,7456754	S	84	12	94.44	2.86	100	97.14	SwitchAS
Ophn1	MmuEX0033098	chrX:95972409-95972719	311	chrX:95976295,95972409-95972719,95959115	S	76	1	1.33	0	85.26	85.26	SwitchAS
Ophn1	MmuEX0033103	chrX:95976885-95976986	102	chrX:95985583,95976885-95976986,95976356	C3	66	0	2.11	0	100	100	SwitchAS
Cdkl5	MmuEX0010660	chrX:157314455-157314500	46	chrX:157362384,157314455-157314500,157303985	S	50	2	96.63	0	100	100	SwitchAS
Mpp1	MmuEX0029529	chrX:72357266-72357340	75	chrX:72357538,72357266-72357340,72356182	S	127	0	99.23	6.73	100	93.27	SwitchAS
Fgfr1	MmuEX0019143	chr8:26683595-26683732	138	chr8:26683261,26683595-26683732,26684018	S	126	1	99.04	0	100	100	SwitchAS
Lsm6	MmuEX0027212	chr8:81339534-81339681	148	chr8:81344947,81339534-81339681,81336979	S	124	10	4.84	0	100	100	SwitchAS
Rfx1	MmuEX0039538	chr8:86608465-86608794	330	chr8:86608073,86608465-86608794,86609472	S	103	3	4.41	0	81.92	81.92	SwitchAS
6430548M08Rik	MmuEX0002175	chr8:122680197-122680274	78	chr8:122677900,122680197-122680274,122683859	C2	99	0	98.78	8.33	100	91.67	SwitchAS
Cdh13	MmuEX0010464	chr8:121375619-121375771	153	chr8:121281384,121375619-121375771,121379267	C3	85	0	98.5	0	100	100	SwitchAS
Dctn1	MmuEX0013949	chr6:83133930-83133950	21	chr6:83133327,83133930-83133950,83136422	C3	117	15	8.41	0	86.71	86.71	SwitchAS
Jam3	MmuEX0024873	chr9:26906430-26906559	130	chr9:26907668,26906430-26906559,26906351	S	121	0	99.01	0	100	100	SwitchAS
C2cd2l	MmuEX0008524	chr9:44122238-44122339	102	chr9:44122963,44122238-44122339,44122094	C1	121	0	98.24	1.08	100	98.92	SwitchAS
Ilf3	MmuEX0024059	chr9:21207580-21207945	366	chr9:21204457,21207580-21207945,21208504	S	132	5	96.03	7.15	100	92.85	SwitchAS
Pkm2	MmuEX0035416	chr9:59510847-59510963	117	chr9:59507383,59510847-59510963,59513007	C3	134	4	2.5	0	91.41	91.41	SwitchAS
Lctl	MmuEX0026248	chr9:63970130-63970225	96	chr9:63970041,63970130-63970225,63974508	S	21	5	93.51	0	100	100	SwitchAS
Lctl	MmuEX0026249	chr9:63974508-63974562	55	chr9:63970225,63974508-63974562,63974645	S	22	14	83.56	0	100	100	SwitchAS
Xrn1	MmuEX0052454	chr9:95880955-95881032	78	chr9:95879643,95880955-95881032,95882194	S	99	3	2.47	0	86.93	86.93	SwitchAS
Faim	MmuEX0017792	chr9:98892182-98892271	90	chr9:98886931,98892182-98892271,98892520	C2	116	5	3.1	0	81.11	81.11	SwitchAS
Lrrfip2	MmuEX0027129	chr9:111085323-111085400	78	chr9:111082776,111085323-111085400,111091266	C3	124	6	5.88	0	90.43	90.43	SwitchAS
Lrrfip2	MmuEX0027130	chr9:111086694-111086783	90	chr9:111085400,111086694-111086783,111091266	C3	127	6	7.17	0	97.43	97.43	SwitchAS
Lrrfip2	MmuEX0027133	chr9:111069553-111069609	57	chr9:111063893,111065352+111069553-111069609,111069704	C3	125	6	4.68	0	92.39	92.39	SwitchAS
Atp2c1	MmuEX0006840	chr9:105351152-105351218	67	chr9:105354134,105351152-105351218,105348506	S	125	0	99.24	6.3	100	93.7	SwitchAS
Folr2	MmuEX0019532	chr7:108992182-108992338	157	chr7:108993718,108992182-108992338,108989511	S	53	2	96.91	0	100	100	SwitchAS
Ank2	MmuEX0004891	chr3:126689503-126689556	54	chr3:126691062,126689503-126689556,126684862	S	79	9	5.34	0	90.57	90.57	SwitchAS
Ank2	MmuEX0004895	chr3:126633479-126633571	93	chr3:126635856,126633479-126633571,126632999	S	92	13	11.06	0	100	100	SwitchAS
Ank2	MmuEX0004897	chr3:126629721-126629812	92	chr3:126631583,126629721-126629812,126626889	C3	98	7	7.33	0	96.77	96.77	SwitchAS
Abcc4	MmuEX0003116	chr14:118927173-118927273	101	chr14:118928189,118927173-118927273,118925625	S	96	1	98.7	12.73	100	87.27	SwitchAS
Lmo7	MmuEX0026621	chr14:102193458-102193528	71	chr14:102129442,102193458-102193528,102206671	S	33	6	91.3	3.63	100	96.37	SwitchAS
Eefsec	MmuEX0016287	chr6:88231543-88231699	157	chr6:88247571,88231543-88231699,88208385	S	128	2	96.65	0	100	100	SwitchAS
Lpp	MmuEX0026754	chr16:24722171-24722222	52	chr16:24722077,24722171-24722222,24761679	C3	72	3	6.21	0	94.91	94.91	SwitchAS
Pdpr	MmuEX0034310	chr8:113653506-113653595	90	chr8:113652237,113653506-113653595,113656777	S	117	0	99	3.77	100	96.23	SwitchAS
Pdpr	MmuEX0034311	chr8:113639024-113639141	118	chr8:113638763,113639024-113639141,113640582	S	117	0	98.88	1.56	100	98.44	SwitchAS
Ptplad1	MmuEX0037769	chr9:64847869-64847984	116	chr9:64848788,64847869-64847984+64848001,64846129	S	124	0	1.73	0	95.08	95.08	SwitchAS
Vps8	MmuEX0051587	chr16:21447328-21447360	33	chr16:21444255,21447328-21447360,21448422	S	91	0	97.26	0	100	100	SwitchAS
Lrrc14	MmuEX0026925	chr15:76543831-76544415	585	chr15:76543650,76543831-76544415,76544510	S	123	2	97.07	0	100	100	SwitchAS
Fstl5	MmuEX0019709	chr3:76392869-76393030	162	chr3:76340286,76392869-76393030,76397365	C1	29	14	90.58	14.22	100	85.78	SwitchAS
Fstl5	MmuEX0019710	chr3:76465680-76465804	125	chr3:76463688,76465680-76465804,76511397	C1	29	3	88.45	5.1	100	94.9	SwitchAS
Fstl5	MmuEX0019712	chr3:76340166-76340286	121	chr3:76286313,76340166-76340286,76392869	C1	29	10	90.32	0	100	100	SwitchAS
Ccs	MmuEX0010109	chr19:4825770-4825873	104	chr19:4825944,4825770-4825873,4825664	S	134	0	99.09	0	100	100	SwitchAS
Usp54	MmuEX0051088	chr14:21383621-21383686	66	chr14:21384090,21383621-21383686,21381464	C1	100	2	2.03	0	88.31	88.31	SwitchAS
Setd5	MmuEX0041841	chr6:113078674-113078771	98	chr6:113078535,113078674-113078771,113087947	S	128	3	3.68	0	97.65	97.65	SwitchAS
Traf3ip1	MmuEX0048702	chr1:93407929-93408024	96	chr1:93404145,93407929-93408024,93414871	C2	67	10	7.88	0	92.14	92.14	SwitchAS
Traf3ip1	MmuEX0048703	chr1:93412691-93412753	63	chr1:93404145,93412691-93412753,93414871	C2	64	6	7.56	0	94.81	94.81	SwitchAS
Fhod3	MmuEX0019235	chr18:25282869-25282892	24	chr18:25278812,25282869-25282892,25284244	S	88	9	11.19	0	100	100	SwitchAS
Tmem132d	MmuEX0047723	chr5:128272719-128272992	274	chr5:128276268,128272719-128272992,128270284	C1	26	15	87.77	0	100	100	SwitchAS
Brip1	MmuEX0008263	chr11:85890142-85890227	86	chr11:85891359,85890142-85890227,85887863	S	45	0	2.47	0	100	100	SwitchAS
Kdelc2	MmuEX0025247	chr9:53206025-53206129	105	chr9:53204143,53206025-53206129,53207792	S	98	0	98.37	0	100	100	SwitchAS
Celf5	MmuEX0010751	chr10:80935566-80935876	311	chr10:80936194,80935566-80935876,80934102	C3	39	8	8.29	0	91.75	91.75	SwitchAS
Nup54	MmuEX0032791	chr5:92863248-92863409	162	chr5:92863538,92863248-92863409,92860148	C3	107	16	9.37	0	91.17	91.17	SwitchAS
Atcay	MmuEX0006560	chr10:80681900-80681958	59	chr10:80687169,80681900-80681958,80677688	S	35	6	95.6	0	100	100	SwitchAS
Scai	MmuEX0041120	chr2:38957841-38957919	79	chr2:38958723,38957841-38957919,38954995	S	55	7	94.4	0	100	100	SwitchAS
Raver2	MmuEX0038964	chr4:100779808-100779999	192	chr4:100775682,100779808-100779999,100793058	S	66	2	97.7	0	100	100	SwitchAS
Myo1d	MmuEX0030488	chr11:80476862-80477026	165	chr11:80480077,80476862-80477026,80476617	S	82	4	2.32	0	85	85	SwitchAS
1700021K19Rik	MmuEX0000462	chr16:32833730-32833804	75	chr16:32836000,32833730-32833804,32829408	S	123	17	7.11	0	87.95	87.95	SwitchAS
Abca7	MmuEX0003012	chr10:79477213-79477305	93	chr10:79477077,79477213-79477305,79477692	S	105	1	98.58	0	100	100	SwitchAS
Tmem161b	MmuEX0047790	chr13:84423590-84423730	141	chr13:84422969,84423590-84423730,84426290	S	110	0	98.99	0	100	100	SwitchAS
Exoc1	MmuEX0017537	chr5:76975103-76975156	54	chr5:76974388,76975103-76975156,76978477	S	124	10	4.84	0	88.58	88.58	SwitchAS
36951	MmuEX0027908	chr8:68910339-68910418	80	chr8:68800611,68910339-68910418,68942715	C1	24	0	94.3	0	100	100	SwitchAS
Cenpt	MmuEX0010861	chr8:108373087-108373223	137	chr8:108373325,108373087-108373223,108372955	S	113	5	96.36	4.81	100	95.19	SwitchAS
Cenpt	MmuEX0010863	chr8:108370884-108371078	195	chr8:108372651,108370884-108371078,108370700	S	119	2	98.5	10.8	100	89.2	SwitchAS
Dner	MmuEX0015263	chr1:84531427-84531572	146	chr1:84577231,84531427-84531572,84491459	S	49	14	90.21	1.41	100	98.59	SwitchAS
Amdhd2	MmuEX0004774	chr17:24300163-24300299	137	chr17:24300549,24300163-24300299,24300082	S	120	2	96.7	0	100	100	SwitchAS
Frem2	MmuEX0019612	chr3:53339646-53339777	132	chr3:53341145,53339646-53339777,53331921	C3	36	3	97.29	14.36	100	85.64	SwitchAS
Zcwpw1	MmuEX0052851	chr5:138259955-138260065	111	chr5:138259120,138259951+138259955-138260065,138260192	S	86	1	2.54	0	86.32	86.32	SwitchAS
Ralgapa2	MmuEX0038619	chr2:146273012-146273211	200	chr2:146274946,146273012-146273211,146269747	S	81	0	98.38	0	100	100	SwitchAS
Nudt22	MmuEX0032619	chr19:7069161-7069259	99	chr19:7069732,7069161-7069259,7068249	S	122	2	98.06	2.2	100	97.8	SwitchAS
Depdc5	MmuEX0014321	chr5:33290522-33290663	142	chr5:33289416,33290522-33290663,33298502	S	118	1	2.88	0	98.03	98.03	SwitchAS
Cib2	MmuEX0011421	chr9:54403037-54403109	73	chr9:54407775,54403037-54403109+54403544,54402328	S	100	4	4.87	0	100	100	SwitchAS
Ppfia1	MmuEX0036499	chr7:151674596-151674622	27	chr7:151677357,151674596-151674622,151671116	C3	136	19	13.79	0	90.55	90.55	SwitchAS
Rapgef6	MmuEX0038811	chr11:54366292-54366375	84	chr11:54359931,54366292-54366375,54374827	S	63	11	96.11	18.01	100	81.99	SwitchAS
Vash2	MmuEX0051265	chr1:192778948-192779004	57	chr1:192782493,192778948-192779004,192778236	C3	40	5	15.04	0	97.51	97.51	SwitchAS
Aspg	MmuEX0006448	chr12:113359364-113359477	114	chr12:113359258,113359364-113359477,113359961	S	49	0	97.77	0	100	100	SwitchAS
Kdm1b	MmuEX0025263	chr13:47153046-47153066	21	chr13:47149104,47153046-47153066,47154145	S	113	19	9.81	0	97.53	97.53	SwitchAS
4921517L17Rik	MmuEX0001408	chr2:156145746-156145799	54	chr2:156138535,156145746-156145799,156154054	C1	27	4	96.76	18.76	100	81.24	SwitchAS
D030016E14Rik	MmuEX0013440	chr8:48614683-48614852	170	chr8:48616006,48614683-48614852,48613384	S	127	0	98.98	0	100	100	SwitchAS
Mphosph9	MmuEX0029510	chr5:124760825-124760928	104	chr5:124762714,124760821+124760825-124760928,124757055	S	70	9	5.13	0	100	100	SwitchAS
Cep250	MmuEX0010950	chr2:155802737-155802797	61	chr2:155802294,155802737-155802797,155804880	S	94	0	1.09	0	100	100	SwitchAS
Smg6	MmuEX0043935	chr11:74867264-74867465	202	chr11:74855538,74867264-74867465,74952695	S	128	2	98.59	19.86	100	80.14	SwitchAS
BC057079	MmuEX0007538	chr4:87972047-87972139	93	chr4:87955817,87972047-87972139,87976873	S	101	2	98.84	18.72	100	81.28	SwitchAS
Jarid2	MmuEX0024883	chr13:45009615-45009745	131	chr13:45009202,45009615-45009745,45010133	S	128	3	98.1	1.08	100	98.92	SwitchAS
Osbpl7	MmuEX0033242	chr11:96928979-96929101	123	chr11:96928874,96928979-96929101,96929256	S	117	0	98.91	4.08	100	95.92	SwitchAS
Nup205	MmuEX0032722	chr6:35138624-35138768	145	chr6:35136604,35138624-35138768,35139096	S	112	1	98.32	3.62	100	96.38	SwitchAS
BC026590	MmuEX0007412	chr4:56816863-56816926	64	chr4:56816519,56816863-56816926,56817026	S	115	1	2.11	0	83.78	83.78	SwitchAS
Mycbpap	MmuEX0030323	chr11:94364785-94364930	146	chr11:94365364,94364785-94364930,94364610	S	35	3	96.55	0	100	100	SwitchAS
Ppp1r10	MmuEX0036662	chr17:36066337-36066531	195	chr17:36066229,36066337-36066531,36066718	S	129	3	96.86	0.65	100	99.35	SwitchAS
Sec24c	MmuEX0041498	chr14:21509926-21510096	171	chr14:21509242,21509926-21510096,21510488	S	135	1	99.24	10.74	100	89.26	SwitchAS
Slc9a8	MmuEX0043628	chr2:167299528-167299675	148	chr2:167299080,167299528-167299675,167299791	S	124	15	94.77	0	100	100	SwitchAS
Atp8b1	MmuEX0006953	chr18:64703044-64703121	78	chr18:64704771,64703044-64703121,64701155	S	52	0	2.37	0	100	100	SwitchAS
Usp53	MmuEX0051078	chr3:122672770-122672876	107	chr3:122685603,122672770-122672876,122672167	C3	100	4	3.61	0	100	100	SwitchAS
Slc7a5	MmuEX0043563	chr8:124420328-124420465	138	chr8:124430966,124420328-124420465,124412327	S	117	0	98.76	1.2	100	98.8	SwitchAS
Cacna2d1	MmuEX0008809	chr5:15668811-15668870	60	chr5:15531683,15668811-15668870,15700573	S	79	0	97.86	1.37	100	98.63	SwitchAS
Aqr	MmuEX0005650	chr2:113972625-113972728	104	chr2:113974675,113972625-113972728,113971466	S	124	2	98.77	13.22	100	86.78	SwitchAS
Akap9	MmuEX0004520	chr5:4031111-4031149	39	chr5:4030052,4031111-4031149,4032681	S	100	13	8.81	0	96.51	96.51	SwitchAS
Adam22	MmuEX0003746	chr5:8092340-8092406	67	chr5:8092731,8092340-8092406,8082269	C1	47	0	95.74	0	100	100	SwitchAS
Ckap5	MmuEX0011475	chr2:91405778-91405960	183	chr2:91404605,91405778-91405960,91408294	S	109	1	99.05	13.56	100	86.44	SwitchAS
Btaf1	MmuEX0008351	chr19:37041166-37041342	177	chr19:37041077,37041166-37041342,37043546	S	108	1	98.43	18.64	100	81.36	SwitchAS
Erc2	MmuEX0017233	chr14:28590012-28590428	417	chr14:28466669,28590012-28590428,28689773	C2	32	6	94.83	15.22	100	84.78	SwitchAS
Agbl2	MmuEX0004203	chr2:90637593-90637746	154	chr2:90634137,90637593-90637746,90641194	S	20	0	93.81	0	100	100	SwitchAS
Tet2	MmuEX0046993	chr3:133142306-133142329	24	chr3:133143097,133142306-133142329,133139599	C2	63	19	20.97	0	100	100	SwitchAS
Dnahc7c	MmuEX0015032	chr1:46356659-46356853	195	chr1:46355219,46356659-46356853,46360391	S	31	6	91	0	100	100	SwitchAS
Vps41	MmuEX0051549	chr13:18902301-18902420	120	chr13:18886261,18902301-18902420,18903436	S	131	2	98.76	14.49	100	85.51	SwitchAS
Pcf11	MmuEX0033945	chr7:99808510-99808690	181	chr7:99809469,99808510-99808690,99808398	S	110	0	98.74	5.56	100	94.44	SwitchAS
Ankrd42	MmuEX0005130	chr7:99759055-99759160	106	chr7:99761253,99759055-99759160,99753890	S	73	0	98.56	2.16	100	97.84	SwitchAS
Coq5	MmuEX0012455	chr5:115744836-115744924	89	chr5:115741049,115744836-115744924,115745675	S	128	5	96.39	17.56	100	82.44	SwitchAS
Dcaf17	MmuEX0013826	chr2:70926404-70926559	156	chr2:70925455,70926404-70926559,70927846	S	110	1	98.58	0	100	100	SwitchAS
Wdr60	MmuEX0051961	chr12:117450198-117450421	224	chr12:117451847,117450198-117450421,117446256	S	110	0	98.87	0	100	100	SwitchAS
Kank3	MmuEX0024954	chr17:33956725-33956941	217	chr17:33956124,33956725-33956941,33958714	S	115	7	94.88	0	100	100	SwitchAS
Rabif	MmuEX0038456	chr1:136399651-136399751	101	chr1:136397798,136399651-136399751,136402653	C3	132	1	1.28	0	85.11	85.11	SwitchAS
Pbrm1	MmuEX0033828	chr14:31857810-31857895	86	chr14:31853717,31857810-31857895,31858516	C2	101	1	98.88	19.12	100	80.88	SwitchAS
Pbrm1	MmuEX0033830	chr14:31863224-31863437	214	chr14:31859609,31863224-31863437,31865366	S	112	1	98.8	17.22	100	82.78	SwitchAS
Pbrm1	MmuEX0033839	chr14:31840634-31840731	98	chr14:31838836,31840634-31840731,31844030	S	119	5	96.36	12.58	100	87.42	SwitchAS
Map3k9	MmuEX0027752	chr12:82828318-82828386	69	chr12:82830670,82828318-82828386,82826821	C1	57	16	28.37	0	100	100	SwitchAS
Fam129c	MmuEX0017926	chr8:74127536-74127726	191	chr8:74126825,74127536-74127726,74127820	S	53	2	97.47	11	100	89	SwitchAS
Fam129c	MmuEX0017927	chr8:74128637-74128753	117	chr8:74127978,74128637-74128753,74128827	C1	59	0	98.01	1.83	100	98.17	SwitchAS
Fam13c	MmuEX0017985	chr10:69913775-69913976	202	chr10:69911562,69913775-69913976,69939902	S	87	1	98.87	14.34	100	85.66	SwitchAS
Ptpn11	MmuEX0037780	chr5:121622531-121622593	63	chr5:121641211,121622531-121622593,121622112	S	132	2	1.74	0	94.87	94.87	SwitchAS
Fam19a2	MmuEX0018241	chr10:123030550-123030656	107	chr10:122867979,123030550-123030656,123141415	C2	23	0	94.63	0	100	100	SwitchAS
Ubr3	MmuEX0050341	chr2:69809459-69809491	33	chr2:69809290,69809459-69809491,69811206	S	126	12	6.17	0	95.34	95.34	SwitchAS
1700001O22Rik	MmuEX0000333	chr2:30651921-30652086	166	chr2:30653388,30651921-30652086,30651803	S	57	4	97.6	17.59	100	82.41	SwitchAS
2310057J16Rik	MmuEX0000951	chr8:3599217-3599249	33	chr8:3598988,3599217-3599249,3600358	C3	80	16	22.53	0	98.56	98.56	SwitchAS
Zbtb7c	MmuEX0052704	chr18:76255091-76255432	342	chr18:76171344,76255091-76255432,76296481	C1	27	7	13.23	0	100	100	SwitchAS
Magi1	MmuEX0027538	chr6:93707649-93707758	110	chr6:93710702,93707649-93707758,93705100	S	104	2	98.54	12.35	100	87.65	SwitchAS
Dmd	MmuEX0014859	chrX:80873906-80874037	132	chrX:80872785,80873906-80874037,80909387	C1	21	14	87.35	1.28	100	98.72	SwitchAS
Dmd	MmuEX0014861	chrX:81047586-81047731	146	chrX:81031654,81047586-81047731,81048645	C1	27	0	96.27	8.27	100	91.73	SwitchAS
Dmd	MmuEX0014867	chrX:81174142-81174324	183	chrX:81173336,81174142-81174324,81200302	C1	31	16	90.38	9.45	100	90.55	SwitchAS
Eif4g1	MmuEX0016611	chr16:20680963-20681149	187	chr16:20680874,20680963-20681149,20681256	S	136	16	92.08	13.87	100	86.13	SwitchAS
Fam178b	MmuEX0018119	chr1:36635364-36635489	126	chr1:36642761,36635364-36635489,36621753	S	39	3	96.07	15.29	100	84.71	SwitchAS
Bst2	MmuEX0008348	chr8:74060258-74060333	76	chr8:74061027,74060258-74060333,74059724	S	122	1	98.54	0	100	100	SwitchAS
Bst2	MmuEX0008349	chr8:74059685-74059724	40	chr8:74060258,74059685-74059724,74058691	S	124	0	98.67	0	100	100	SwitchAS
Cltb	MmuEX0011798	chr13:54698387-54698440	54	chr13:54700083,54698387-54698440,54696588	C3	137	17	11.33	0	84.74	84.74	SwitchAS
Tmc8	MmuEX0047588	chr11:117651530-117651653	124	chr11:117648182,117651530-117651653,117651997	S	44	5	95.88	3.43	100	96.57	SwitchAS
Rltpr	MmuEX0039939	chr8:108217425-108217491	67	chr8:108217296,108217425-108217491,108217914	S	23	17	88.92	1.33	100	98.67	SwitchAS
Prkca	MmuEX0037111	chr11:107806871-107806918	48	chr11:107812780,107806871-107806918,107800994	S	115	9	3.49	0	84.31	84.31	SwitchAS
Zfp524	MmuEX0053421	chr7:4968548-4968646	99	chr7:4967162,4968548-4968646,4969039	S	93	6	5.51	0	100	100	SwitchAS
Nup160	MmuEX0032699	chr2:90542170-90542269	100	chr2:90540740,90542170-90542269,90542538	S	113	18	92.71	13.98	100	86.02	SwitchAS
Mical3	MmuEX0028985	chr6:120921769-120921858	90	chr6:120923421,120921769-120921858,120919510	C3	88	19	10.51	0	97.93	97.93	SwitchAS
1190005F20Rik	MmuEX0000183	chr1:153286412-153286523	112	chr1:153282971,153286412-153286523,153286646	S	119	3	3.11	0	100	100	SwitchAS
Ppfia2	MmuEX0036509	chr10:106341873-106341902	30	chr10:106340761,106341873-106341902,106343422	S	29	10	90.92	7.42	100	92.58	SwitchAS
Ercc6	MmuEX0017259	chr14:33377875-33377929	55	chr14:33375837,33377875-33377929,33379429	S	92	2	2.93	0	100	100	SwitchAS
Iigp1	MmuEX0023855	chr18:60547913-60548024	112	chr18:60535784,60547913-60548024,60549446	C1	31	10	7.14	0.28	81.44	81.16	SwitchAS
Agap1	MmuEX0004184	chr1:91622536-91622640	105	chr1:91567846,91622536-91622640,91640303	S	113	0	99	0	100	100	SwitchAS
5033411D12Rik	MmuEX0001935	chr13:17669324-17669415	92	chr13:17736615,17669324-17669415,17646303	C1	37	3	96.28	1.1	100	98.9	SwitchAS
5033411D12Rik	MmuEX0001936	chr13:17544291-17544386	96	chr13:17646160,17544291-17544386,17415110	S	29	7	93.83	0	100	100	SwitchAS
Ncoa4	MmuEX0031162	chr14:32979383-32979456	74	chr14:32979008,32979383-32979456,32983934	C3	130	9	4.86	0	89.21	89.21	SwitchAS
Ryr3	MmuEX0040877	chr2:112512392-112512488	97	chr2:112515426,112512392-112512488,112510850	S	20	5	79.91	2.75	100	97.25	SwitchAS
Dock1	MmuEX0015371	chr7:141935887-141936022	136	chr7:141932817,141935887-141936022,141936633	S	108	9	95.16	14.62	100	85.38	SwitchAS
Anks1b	MmuEX0005185	chr10:90143512-90143664	153	chr10:90107301,90143512-90143664,90357844	S	28	14	93.48	14.06	100	85.94	SwitchAS
Mbtd1	MmuEX0028136	chr11:93800835-93801026	192	chr11:93795272,93800835-93801026,93804976	C3	54	11	7.87	0	82.74	82.74	SwitchAS
Zfp426	MmuEX0053326	chr9:20282577-20282698	122	chr9:20290774,20282577-20282698,20280922	C1	102	1	97.55	11.96	100	88.04	SwitchAS
Zfp426	MmuEX0053327	chr9:20280840-20280922	83	chr9:20282577,20280840-20280922,20279477	C1	112	11	95.52	17.03	100	82.97	SwitchAS
Serpinb6a	MmuEX0041782	chr13:34027496-34027663	168	chr13:34027791,34027496-34027663,34023515	C1	130	12	6.61	0	81.23	81.23	SwitchAS
Acyp2	MmuEX0003686	chr11:30533686-30533702	17	chr11:30549301,30533686-30533702,30532317	S	96	0	98.14	1.82	100	98.18	SwitchAS
Acyp2	MmuEX0003687	chr11:30532208-30532317	110	chr11:30549301,30532208-30532317,30515359	C3	111	0	98.59	3.57	100	96.43	SwitchAS
Efcab4b	MmuEX0016309	chr6:127553848-127554090	243	chr6:127539037,127553848-127554090,127557208	C2	25	4	92.55	0	100	100	SwitchAS
Pclo	MmuEX0033982	chr5:14778539-14778565	27	chr5:14775444,14778539-14778565,14788398	S	30	13	70.29	0	100	100	SwitchAS
Inadl	MmuEX0024108	chr4:98135911-98135930	20	chr4:98131886,98135911-98135930,98136164	S	71	7	6.55	0	93.44	93.44	SwitchAS
Atp11c	MmuEX0006764	chrX:57483100-57483190	91	chrX:57489734,57483100-57483190,57482429	C2	100	18	10.21	0	81.3	81.3	SwitchAS
Nrg1	MmuEX0032331	chr8:32934916-32935042	127	chr8:32936725,32934916-32935042,32932829	C1	54	15	92.71	2.46	100	97.54	SwitchAS
Ctnna2	MmuEX0013054	chr6:77602999-77603165	167	chr6:77708390,77602999-77603165,77591467	S	41	0	94.86	1.89	100	98.11	SwitchAS
Kif1b	MmuEX0025491	chr4:148579795-148579995	201	chr4:148580827,148579795-148579995,148578403	S	122	5	3.93	0	81.65	81.65	SwitchAS
Luzp2	MmuEX0027333	chr7:62504768-62504860	93	chr7:62467256,62504768-62504860,62519650	C2	31	10	92.43	2.46	100	97.54	SwitchAS
Slc39a4	MmuEX0043297	chr15:76444217-76444375	159	chr15:76444487,76444217-76444375,76444147	S	60	5	96.65	1.86	100	98.14	SwitchAS
Eno1	MmuEX0016865	chr4:149615876-149615934	59	chr4:149615249,149615876-149615934,149618114	S	40	18	71.35	0	100	100	SwitchAS
Alms1	MmuEX0004707	chr6:85557466-85557586	121	chr6:85551385,85557466-85557586,85558980	S	46	4	96.69	18.92	100	81.08	SwitchAS
Fam172a	MmuEX0018082	chr13:77964584-77964649	66	chr13:77901199,77964584-77964649,77973771	C1	105	2	97.64	9.09	100	90.91	SwitchAS
Tank	MmuEX0046264	chr2:61451708-61451855	148	chr2:61431265,61451708-61451855,61464960	C3	129	3	96.36	2.44	100	97.56	SwitchAS
Fkbp15	MmuEX0019274	chr4:61997435-61997581	147	chr4:61998091,61997435-61997581,61995294	S	123	1	98.53	2.04	100	97.96	SwitchAS
Lrch1	MmuEX0026775	chr14:75192934-75193038	105	chr14:75194718,75192934-75193038,75186197	C3	112	18	11.3	0	90.84	90.84	SwitchAS
Il3ra	MmuEX0024010	chr14:15182362-15182448	87	chr14:15181886,15182362-15182448,15182549	C1	82	17	7.94	0	85.75	85.75	SwitchAS
Zfp748	MmuEX0053599	chr13:67652655-67652739	85	chr13:67653967,67652655-67652739,67647687	S	80	2	2.26	0	100	100	SwitchAS
Ank3	MmuEX0004907	chr10:69469551-69469601	51	chr10:69467739,69469551-69469601,69476720	C3	98	2	1.5	0	80.99	80.99	SwitchAS
Ank3	MmuEX0004908	chr10:69476938-69476994	57	chr10:69476803,69476938-69476994,69478316	C3	103	4	4.5	0	100	100	SwitchAS
Fam57a	MmuEX0018380	chr11:76018756-76018957	202	chr11:76016137,76018756-76018957,76020630	S	97	10	95.34	1.94	100	98.06	SwitchAS
Prss36	MmuEX0037442	chr7:135076885-135077006	122	chr7:135077081,135076885-135077006,135076628	C1	111	6	96.53	0	100	100	SwitchAS
Ampd1	MmuEX0004809	chr3:102899565-102899685	121	chr3:102898800,102899565-102899685,102901749	C3	30	7	79.17	0	100	100	SwitchAS
Fndc1	MmuEX0019469	chr17:7977211-7977309	99	chr17:7981859,7977211-7977309,7975353	S	41	7	94.48	11.63	100	88.37	SwitchAS
4933437F05Rik	MmuEX0001918	chr12:88565808-88565988	181	chr12:88567861,88565808-88565988,88565259	C1	24	8	66.59	1.69	100	98.31	SwitchAS
Lmbrd1	MmuEX0026593	chr1:24749786-24749846	61	chr1:24742418,24749786-24749846,24761666	S	132	0	98.83	0	100	100	SwitchAS
1700029G01Rik	MmuEX0000514	chr4:125840046-125840109	64	chr4:125840210,125840046-125840109,125839815	S	35	9	94.39	0	100	100	SwitchAS
Tox2	MmuEX0048543	chr2:163140058-163140297	240	chr2:163101950,163140058-163140297,163141531	S	53	0	97.92	0	100	100	SwitchAS
Ano3	MmuEX0005249	chr2:110585978-110586074	97	chr2:110597095,110585978-110586074,110578988	C1	27	7	93.3	0	100	100	SwitchAS
Ano3	MmuEX0005251	chr2:110511276-110511373	98	chr2:110521972,110511276-110511373,110508010	S	28	4	91.11	0	100	100	SwitchAS
Ano3	MmuEX0005252	chr2:110507877-110508010	134	chr2:110511276,110507877-110508010,110506684	S	27	4	94.61	3.49	100	96.51	SwitchAS
Ano3	MmuEX0005255	chr2:110501324-110501429	106	chr2:110501581,110501324-110501429,110498479	S	29	17	92.4	6.27	100	93.73	SwitchAS
Ppil6	MmuEX0036595	chr10:41227230-41227365	136	chr10:41222858,41227230-41227365,41233897	C1	45	4	97.23	10.61	100	89.39	SwitchAS
U2af1l4	MmuEX0050050	chr7:31349493-31349626	134	chr7:31349320,31349493-31349626,31349722	C1	136	10	96.13	17.58	100	82.42	SwitchAS
Slc8a3	MmuEX0043599	chr12:82317708-82317814	107	chr12:82415247,82317708-82317814,82315156	C1	37	5	5.61	0	89	89	SwitchAS
Rab7	MmuEX0038391	chr6:87965626-87965712	87	chr6:87969630,87965626-87965712,87963692	C3	99	5	95.09	9.29	100	90.71	SwitchAS
AC170752.1	MmuEX0002699	chr10:127930390-127930409	20	chr10:127930595,127930390-127930409,127930101	C3	124	19	7.66	0	87.61	87.61	SwitchAS
Cacna1e	MmuEX0008773	chr1:156297976-156297987	12	chr1:156312849,156297976-156297987,156296072	MIC	24	4	70.06	0	100	100	SwitchAS
Cacna1b	MmuEX0008732	chr2:24498373-24498378	6	chr2:24503999,24498373-24498378,24494730	MIC	26	15	21.15	0	100	100	SwitchAS
Ergic3	MmuEX0017296	chr2:155841113-155841127	15	chr2:155837142,155841113-155841127,155841725	MIC	137	19	13.61	0	91.62	91.62	SwitchAS
Vav2	MmuEX0051281	chr2:27155950-27155964	15	chr2:27157528,27155950-27155964,27154992	MIC	112	17	12.4	0	97.21	97.21	SwitchAS
Vav2	MmuEX0051282	chr2:27140359-27140373	15	chr2:27141153,27140359-27140373,27138938	MIC	106	14	10.72	0	97.04	97.04	SwitchAS
Pacsin2	MmuEX0033441	chr15:83214053-83214058	6	chr15:83215417,83214053-83214058,83212313	MIC	133	14	13.33	0	96.55	96.55	SwitchAS
Slc12a5	MmuEX0042583	chr2:164822364-164822378	15	chr2:164822018,164822364-164822378,164822610	MIC	42	10	58.87	0	100	100	SwitchAS
Cadps2	MmuEX0008897	chr6:23304194-23304202	9	chr6:23305824,23304194-23304202,23294363	MIC	51	14	31.11	0	100	100	SwitchAS
Myo1b	MmuEX0030480	chr1:51843417-51843422	6	chr1:51850484,51843417-51843422,51841385	MIC	95	13	6.9	0	84.45	84.45	SwitchAS
Micu1	MmuEX0029002	chr10:59219454-59219465	12	chr10:59213295,59219454-59219465,59230886	MIC	123	13	5.52	0	86.83	86.83	SwitchAS
Sypl	MmuEX0046015	chr12:33653499-33653508	10	chr12:33652608,33653499-33653508,33658993	MIC	137	18	8.01	0	80.15	80.15	SwitchAS
Ralgapa1	MmuEX0038612	chr12:56706687-56706689	3	chr12:56713621,56706687-56706689,56705255+56706484	MIC	75	15	22.38	0	100	100	SwitchAS
Ryr2	MmuEX0040867	chr13:11983101-11983115	15	chr13:11995485+12010578,11983101-11983115,11977805	MIC	22	9	92.54	17.24	100	82.76	SwitchAS
Vcl	MmuEX0051310	chr14:21807500-21807502	3	chr14:21806340,21807500-21807502,21814234	MIC	126	10	4.31	0	91.3	91.3	SwitchAS
Asap1	MmuEX0006334	chr15:63985406-63985414	9	chr15:63990444+63990480,63985406-63985414,63984492	MIC	122	13	18.57	0	100	100	SwitchAS
Sidt1	MmuEX0042345	chr16:44256080-44256094	15	chr16:44258046,44256080-44256094,44255140	MIC	46	7	31.35	0	100	100	SwitchAS
Arl6	MmuEX0006149	chr16:59618492-59618504	13	chr16:59618621,59618492-59618504,59613670	MIC	115	9	7.27	0	98.7	98.7	SwitchAS
Celsr3	MmuEX0010772	chr9:108741091-108741105	15	chr9:108740896,108741091-108741105,108742331	MIC	32	12	73.21	0	100	100	SwitchAS
Papss2	MmuEX0033622	chr19:32720819-32720833	15	chr19:32715901,32720819-32720833,32726386	MIC	90	16	13.19	0	96.96	96.96	SwitchAS
Dock9	MmuEX0015479	chr14:121943798-121943805	8	chr14:121945188,121943798-121943805,121942847	MIC	124	15	16.33	0	99.02	99.02	SwitchAS
Dock9	MmuEX0015480	chr14:121959617-121959622	6	chr14:121959812,121959617-121959622,121958355+121959182	MIC	114	18	15.85	0	98.93	98.93	SwitchAS
Tnnt2	MmuEX0048341	chr1:137746956-137746964	9	chr1:137746037,137746956-137746964,137747288	MIC	64	19	14.61	0	93.7	93.7	SwitchAS
Itga8	MmuEX0024631	chr2:12114897-12114909	13	chr2:12115039,12114897-12114909,12113470	MIC	45	4	3.59	0	82.68	82.68	SwitchAS
Sh3glb2	MmuEX0042200	chr2:30204746-30204757	12	chr2:30205808,30204746-30204757,30204137	MIC	127	16	17.87	0	97.15	97.15	SwitchAS
Ralgapb	MmuEX0038647	chr2:158275225-158275233	9	chr2:158274185,158275225-158275233,158275913+158275925	MIC	122	18	8.33	0	86.19	86.19	SwitchAS
Casq2	MmuEX0009285	chr3:101937013-101937021	9	chr3:101931909,101937013-101937021,101937300	MIC	54	7	5.47	0	89.28	89.28	SwitchAS
Rph3a	MmuEX0040386	chr5:121430139-121430150	12	chr5:121436446+121458993,121430139-121430150,121423453+121413962	MIC	30	13	92.21	0	100	100	SwitchAS
Ano1	MmuEX0005238	chr7:151805380-151805391	12	chr7:151807573,151805380-151805391,151804825	MIC	62	15	95.49	15.04	100	84.96	SwitchAS
Taf1	MmuEX0046161	chrX:98786073-98786078	6	chrX:98785928,98786073-98786078,98789279	MIC	125	19	11.2	0	92.05	92.05	SwitchAS
Flna	MmuEX0019329	chrX:71486155-71486162	8	chrX:71486442,71486155-71486162,71485889	MIC	118	14	6.05	0	92.84	92.84	SwitchAS
Ap1s2	MmuEX0005412	chrX:160369295-160369303	9	chrX:160355775,160369295-160369303,160370065	MIC	102	13	26.35	0	99.8	99.8	SwitchAS
L1cam	MmuEX0025977	chrX:71112361-71112375	15	chrX:71115068,71112361-71112375,71111499	MIC	59	8	43.41	0	100	100	SwitchAS
L1cam	MmuEX0025978	chrX:71100991-71101002	12	chrX:71101098,71100991-71101002,71100605	MIC	69	17	41.38	0	100	100	SwitchAS
Slit2	MmuEX0043688	chr5:48582242-48582253	12	chr5:48580831,48582242-48582253,48583432	MIC	58	19	36.21	0	100	100	SwitchAS
Dctn1	MmuEX0013951	chr6:83147313-83147327	15	chr6:83146101,83147313-83147327,83147485	MIC	126	8	19.53	0	98.44	98.44	SwitchAS
Gmppa	MmuEX0021285	chr1:75437735-75437749	15	chr1:75437117,75437735-75437749,75438050	MIC	129	15	6	0	91.03	91.03	SwitchAS
Rpgrip1l	MmuEX0040382	chr8:93799924-93799935	12	chr8:93804617,93799924-93799935,93799635	MIC	55	13	23.45	0	100	100	SwitchAS
Myo5a	MmuEX0030525	chr9:75035329-75035337	9	chr9:75033929,75035329-75035337,75037707	MIC	100	9	24.27	0	100	100	SwitchAS
Mast4	MmuEX0028014	chr13:103596231-103596239	9	chr13:103600581,103596231-103596239,103594800	MIC	85	15	8.68	0	85.37	85.37	SwitchAS
Bbs9	MmuEX0007764	chr9:22452464-22452478	15	chr9:22450512+22448291,22452464-22452478,22458516+22459669	MIC	111	16	18.5	0	99.58	99.58	SwitchAS
Eea1	MmuEX0016251	chr10:95462985-95462999	15	chr10:95459726,95462985-95462999,95465521	MIC	104	12	5.23	0	81.98	81.98	SwitchAS
Cyld	MmuEX0013303	chr8:91242189-91242197	9	chr8:91233895,91242189-91242197,91243197	MIC	123	19	9.91	0	91.94	91.94	SwitchAS
Asxl2	MmuEX0006507	chr12:3442795-3442797	3	chr12:3442556,3442795-3442797,3451662	MIC	99	17	92.8	0	100	100	SwitchAS
Rapgef6	MmuEX0038816	chr11:54465251-54465265	15	chr11:54462841,54465251-54465265,54470748	MIC	93	16	11.34	0	93.58	93.58	SwitchAS
N4bp2	MmuEX0030693	chr5:66193620-66193630	11	chr5:66189406,66193620-66193630,66194660	MIC	87	6	3.29	0	80.13	80.13	SwitchAS
Cdon	MmuEX0010675	chr9:35283315-35283328	14	chr9:35281150,35283315-35283328,35284462	MIC	87	16	11.23	0	94.59	94.59	SwitchAS
Slc43a2	MmuEX0043333	chr11:75379906-75379917	12	chr11:75377210,75379906-75379917,75380481	MIC	112	18	15.19	0	99.13	99.13	SwitchAS
Cc2d2a	MmuEX0009425	chr5:44108176-44108190	15	chr5:44107084,44108176-44108190,44109792	MIC	91	16	7.38	0	90.84	90.84	SwitchAS
Phtf2	MmuEX0034919	chr5:20318759-20318770	12	chr5:20319058,20318759-20318770,20313291	MIC	102	11	4.75	0	99.04	99.04	SwitchAS
Madd	MmuEX0027511	chr2:91012484-91012492	9	chr2:91013270,91012484-91012492,91010904	MIC	109	6	5.09	0	87.27	87.27	SwitchAS
Git2	MmuEX0020453	chr5:115203157-115203162	6	chr5:115203288,115203157-115203162,115202336+115202339	MIC	124	18	14.5	0	98.3	98.3	SwitchAS
Reln	MmuEX0039407	chr5:21397380-21397385	6	chr5:21401807,21397380-21397385,21391387	MIC	73	15	28.33	0	99.36	99.36	SwitchAS
Prdm10	MmuEX0036941	chr9:31150840-31150851	12	chr9:31149069,31150840-31150851,31154378	MIC	61	11	7.58	0	90.13	90.13	SwitchAS
Acap2	MmuEX0003401	chr16:31129700-31129711	12	chr16:31131346,31129700-31129711,31127519	MIC	117	18	14.56	0	99.5	99.5	SwitchAS
Snx21	MmuEX0044258	chr2:164617058-164617068	11	chr2:164612355,164617058-164617068,164617213	MIC	110	17	23.93	0	97.9	97.9	SwitchAS
Eml5	MmuEX0016816	chr12:100058071-100058079	9	chr12:100059810,100058071-100058079,100056108	MIC	24	12	86.97	0	100	100	SwitchAS
Hook2	MmuEX0023175	chr8:87522285-87522290	6	chr8:87522190,87522285-87522290,87522389	MIC	99	14	11.69	0	95.24	95.24	SwitchAS
Chchd3	MmuEX0011125	chr6:32843392-32843406	15	chr6:32918201,32843392-32843406,32842375	MIC	136	16	14.75	0	99.02	99.02	SwitchAS
6330403A02Rik	MmuEX0002131	chr1:182369237-182369245	9	chr1:182372675,182369237-182369245,182368494	MIC	42	10	46.24	0	100	100	SwitchAS
Eef1d	MmuEX0016267	chr15:75736316-75736330	15	chr15:75739675+75739890,75736316-75736330,75734238	MIC	28	0	92.61	0	100	100	SwitchAS
Ryr3	MmuEX0040881	chr2:112521892-112521906	15	chr2:112526732,112521892-112521906,112518704	MIC	22	9	58.67	0	100	100	SwitchAS
Anks1b	MmuEX0005190	chr10:90403309-90403320	12	chr10:90386347,90403309-90403320,90404171	MIC	30	13	92.81	13.51	100	86.49	SwitchAS
Clasp1	MmuEX0011503	chr1:120444233-120444235	3	chr1:120442033+120443526,120444233-120444235,120444442	MIC	108	6	93.14	2.29	100	97.71	SwitchAS
Scyl2	MmuEX0041350	chr10:89117080-89117091	12	chr10:89119453,89117080-89117091,89116971	MIC	116	15	17.56	0	94.7	94.7	SwitchAS
Fryl	MmuEX0019673	chr5:73442106-73442114	9	chr5:73445292,73442106-73442114,73441744	MIC	119	19	11.86	0	96.17	96.17	SwitchAS
Hnrnpd	MmuEX0023100	chr5:100392750-100392896	147	chr5:100393003,100392750-100392896,100391631	S	139	99	59.09	33.49	95.56	62.07	PanAS
Hnrnpd	MmuEX0023101	chr5:100405553-100405609	57	chr5:100407411,100405553-100405609,100396406	S	134	98	60.89	4.7	100	95.3	PanAS
Fmr1	MmuEX0019414	chrX:65959036-65959098	63	chrX:65958555,65959036-65959098,65961217	S	118	98	41.86	12.76	100	87.24	PanAS
Dlg3	MmuEX0014808	chrX:97966646-97966699	54	chrX:97963767,97966646-97966699,97966954	S	29	97	32.82	6.24	63.39	57.15	PanAS
Rin2	MmuEX0039883	chr2:145648346-145648497	152	chr2:145648101,145648346-145648497,145670447	S	81	95	25.87	4.92	63.64	58.72	PanAS
Nfix	MmuEX0031618	chr8:87247627-87247749	123	chr8:87250368,87247627-87247749,87245717	S	107	81	71.25	14.81	98.44	83.63	PanAS
Hsf2bp	MmuEX0023345	chr17:32124293-32124396	104	chr17:32144621,32124293-32124396,32083756	S	30	90	76.93	47.22	100	52.78	PanAS
Celf2	MmuEX0010737	chr2:6470878-6471021	144	chr2:6474831,6470878-6471021,6468259	S	110	81	79.79	43.48	98.23	54.75	PanAS
Irf9	MmuEX0024518	chr14:56223305-56223390	86	chr14:56223080,56223305-56223390+56223558,56223889	S	94	91	24.33	5.26	100	94.74	PanAS
Tsc2	MmuEX0049265	chr17:24738334-24738402	69	chr17:24739039,24738334-24738402,24737410	S	123	86	30.15	0	67.84	67.84	PanAS
Tsc2	MmuEX0049266	chr17:24743169-24743297	129	chr17:24744382,24743169-24743297,24741934+24741937	S	125	89	45.95	0.92	100	99.08	PanAS
Puf60	MmuEX0038025	chr15:75905037-75905087	51	chr15:75905972,75905037-75905087,75902998	S	135	99	36.46	7.92	95.01	87.09	PanAS
Kcnn1	MmuEX0025104	chr8:73372677-73372787	111	chr8:73374499,73372677-73372787,73372201	S	66	88	76.66	53.49	100	46.51	PanAS
Med25	MmuEX0028540	chr7:52135937-52136008	72	chr7:52136293,52135937-52136008,52135834+52135840	S	129	88	80.77	54.55	100	45.45	PanAS
Ddr1	MmuEX0014034	chr17:35823426-35823536	111	chr17:35824090,35823426-35823536,35822495	S	112	94	69.81	20.59	95.45	74.86	PanAS
Brd8	MmuEX0008228	chr18:34770064-34770282	219	chr18:34770786,34770064-34770282,34769603	S	131	98	66.27	31.03	100	68.97	PanAS
Syce2	MmuEX0045885	chr8:87407330-87407483	154	chr8:87396731,87407330-87407483,87409834	S	83	100	59.27	18.92	88.3	69.38	PanAS
Nfat5	MmuEX0031577	chr8:109862195-109862256	62	chr8:109848664,109862195-109862256,109862709	S	92	98	47.63	12.78	100	87.22	PanAS
Ssbp2	MmuEX0045020	chr13:91781907-91781996	90	chr13:91704299,91781907-91781996,91803723	S	116	95	74.47	13.32	100	86.68	PanAS
Dnaja3	MmuEX0015127	chr16:4705844-4705960	117	chr16:4702308,4705844-4705960,4706568+4706573	S	138	93	17.77	0	89.47	89.47	PanAS
Cacna1e	MmuEX0008776	chr1:156335174-156335263	90	chr1:156335915,156335174-156335263,156333837	S	23	100	58.39	24.66	85.54	60.88	PanAS
Arhgef40	MmuEX0006037	chr14:52624554-52624574	21	chr14:52624417,52624554-52624574,52624664	S	106	95	20.96	5.38	68.74	63.36	PanAS
Hdac9	MmuEX0022529	chr12:35092631-35092762	132	chr12:35114363,35092631-35092762,35087732	S	62	85	75.33	51.35	100	48.65	PanAS
Ccdc130	MmuEX0009533	chr8:86783012-86783150	139	chr8:86784193,86783012-86783150,86782825	S	129	81	79.76	20	100	80	PanAS
Chd5	MmuEX0011183	chr4:151759833-151759947	115	chr4:151759705,151759833-151759947,151760058	S	38	84	51.3	6.75	92.77	86.02	PanAS
Pex5	MmuEX0034521	chr6:124354151-124354240	90	chr6:124354648,124354151-124354240+124354261,124353925	S	124	98	34.11	7.17	73.03	65.86	PanAS
[truncated: 5,517 more rows]

## Sheet: Chicken
GENE	EVENT_ID	COORDINATE	LENGTH	FullCO	COMPLEX	N_samples	PercAS	AvPSI	MIN	MAX	RANGE	TYPE
[truncated: 4,059 more rows]
