# Supplementary material for: An atlas of alternative splicing profiles and functional associations reveals new regulatory programs and genes that simultaneously express multiple major isoforms
Source: HighWire-hosted journal article supplement (doi:10.1101/gr.220962.117), 2017-08-30
Supplement: Supplemental_Table_S5.xlsx [file Supplemental_Table_S5.xlsx]

## Sheet: Supplemental Table S5
		Supplemental Table S5 – Primer sequences used in this study. For each event, the primer sequences as well as general information (annealing temperature, expected amplicon sizes) are provided.
Figure	Gene	Event	Coord	Length	Full_coord	Side	Primer_sequence	Band_sizes
Figure1C	Ptbp2	MmuEX0037640	chr3:119427530-119427563	34	chr3:119428984,119427530-119427563,119427104	F	GCTGGTGGCAATACAGTCCTG	128-162
Figure1C	Ptbp2	MmuEX0037640	chr3:119427530-119427563	34	chr3:119428984,119427530-119427563,119427104	R	CTGGTTCCCATCAGCCATCTG	128-162
Figure2C	Mbd1	MmuEX0028065	chr18:74435561-74435725	165	chr18:74435071,74435558+74435561-74435725,74436061	F	CCCACATCACCTGCTGAGTTC	252-420
Figure2C	Mbd1	MmuEX0028065	chr18:74435561-74435725	165	chr18:74435071,74435558+74435561-74435725,74436061	R	ACCTGCTTGCTGCTTTCTTGA	252-420
FigureS2A	Axin1	MmuEX0007151	chr17:26329461-26329568	108	chr17:26327176,26329461-26329568,26330884	F	AATCCAGCCCCTAATCCCCTG	256-364
FigureS2A	Axin1	MmuEX0007151	chr17:26329461-26329568	108	chr17:26327176,26329461-26329568,26330884	R	TCCCCTTCTTGGTTAGCAGCT	256-364
FigureS2A	Cnot4	MmuEX0011930	chr6:34974128-34974340	213	chr6:35001062,34974128-34974340,34973432	F	GACTTGAATCTCCCGCCACAG	301-514
FigureS2A	Cnot4	MmuEX0011930	chr6:34974128-34974340	213	chr6:35001062,34974128-34974340,34973432	R	GTCTGAAGGCTGTCTGGAAGC	301-514
FigureS2A	Foxj3	MmuEX0019546	chr4:119282595-119282696	102	chr4:119275097,119282595-119282696,119289113	F	GGTTCTTACTGGGCAATAGACACC	210-312
FigureS2A	Foxj3	MmuEX0019546	chr4:119282595-119282696	102	chr4:119275097,119282595-119282696,119289113	R	TGTATAACTATGTACACTTCCAACAC	210-312
FigureS2A	Hdac7	MmuEX0022512	chr15:97639091-97639201	111	chr15:97639398,97639091-97639201,97638964	F	TTCCTCCCCCAGTAGTAGCAG	257-368
FigureS2A	Hdac7	MmuEX0022512	chr15:97639091-97639201	111	chr15:97639398,97639091-97639201,97638964	R	CATGAGAGACTGAGGGGTCCA	257-368
FigureS2A	Kat5	MmuEX0024981	chr19:5608802-5608957	156	chr19:5609236,5608802-5608957+5608984,5608712	F	AACAAACGTCTGGATGAATGGGT	210-366
FigureS2A	Kat5	MmuEX0024981	chr19:5608802-5608957	156	chr19:5609236,5608802-5608957+5608984,5608712	R	CTGAGGGAAAACCGAGGCTG	210-366
FigureS2A	Kdm1a	MmuEX0025261	chr4:136137955-136138014	60	chr4:136148880,136137955-136138014,136133119	F	AGCCCCACCTGAGGAAGAAAA	141-201
FigureS2A	Kdm1a	MmuEX0025261	chr4:136137955-136138014	60	chr4:136148880,136137955-136138014,136133119	R	TGAGGCCCACTGATGATGTCT	141-201
FigureS2A	Ncor1	MmuEX0031190	chr11:62216938-62216964	27	chr11:62217301,62216938-62216964,62214769	F	TAACCAGCCATCAGATACCAAGG	112-139
FigureS2A	Ncor1	MmuEX0031190	chr11:62216938-62216964	27	chr11:62217301,62216938-62216964,62214769	R	CCTTTGTTTTCTTGCATGATTTCTT	112-139
FigureS2A	Pcgf5	MmuEX0033964	chr19:36525054-36525113	60	chr19:36519567,36525054-36525113,36530111	F	ACAAGATGGCGACTAAGAGGAGA	141-201
FigureS2A	Pcgf5	MmuEX0033964	chr19:36525054-36525113	60	chr19:36519567,36525054-36525113,36530111	R	CACTGTGCAATCTGTCGACGA	141-201
FigureS2A	Stag2	MmuEX0045244	chrX:39619543-39619653	111	chrX:39619452,39619543-39619653,39622558	F	CCCTGTCATGATGCAGACACC	244-355
FigureS2A	Stag2	MmuEX0045244	chrX:39619543-39619653	111	chrX:39619452,39619543-39619653,39622558	R	GGTGTCAAAGTCCATTCCCTCA	244-355
FigureS2A	Yap1	MmuEX0052491	chr9:7950492-7950539	48	chr9:7952953,7950492-7950539,7938538	F	TTCCAACCAGCAGCAGCAAAT	133-181
FigureS2A	Yap1	MmuEX0052491	chr9:7950492-7950539	48	chr9:7952953,7950492-7950539,7938538	R	TCCATCCTGCTCCAGTGTAGG	133-181
FigureS2A	Zmynd11	MmuEX0053970	chr13:9709392-9709553	162	chr13:9720019,9709392-9709553,9697951	F	GTATATGTCCCGAGTCCACG	238-400
FigureS2A	Zmynd11	MmuEX0053970	chr13:9709392-9709553	162	chr13:9720019,9709392-9709553,9697951	R	CCGCTCCTTCATTCGGGA	238-400
FigureS5C	Clasp2	MmuEX0011530	chr9:113784383-113784445	63	chr9:113779848,113784383-113784445,113785362	F	TATTCCTCGGCCGAGTGTGAG	147-210
FigureS5C	Clasp2	MmuEX0011530	chr9:113784383-113784445	63	chr9:113779848,113784383-113784445,113785362	R	GCACTGACAGAGGACGACAAC	147-210
FigureS5C	Aifm3	MmuEX0004425	chr16:17506992-17507012	21	chr16:17506427,17506992-17507012,17507220	F	CCATCGTATCCAAGGTGGCTG	117-138
FigureS5C	Aifm3	MmuEX0004425	chr16:17506992-17507012	21	chr16:17506427,17506992-17507012,17507220	R	ACCACAGGAGAGCTCAGGATC	117-138
FigureS5C	1110002L01Rik	MmuEX0000073	chr12:3423100-3423184	85	chr12:3426501,3423100-3423184,3407924	F	TGTTGAGGAGTGGCTCTGGAA	179-264
FigureS5C	1110002L01Rik	MmuEX0000073	chr12:3423100-3423184	85	chr12:3426501,3423100-3423184,3407924	R	TCCAGTCTTCAATCCTGGCCT	179-264
FigureS5C	Slc9a7	MmuEX0043622	chrX:19716039-19716098	60	chrX:19735941,19716039-19716098,19708960	F	CCCGCCAGATGATGTTCACAA	134-194
FigureS5C	Slc9a7	MmuEX0043622	chrX:19716039-19716098	60	chrX:19735941,19716039-19716098,19708960	R	AGGTGGTGGGTCTTGATCTGG	134-194
FigureS5C	1700106N22Rik (Camkmt)	MmuEX0000613	chr17:85792798-85792852	55	chr17:85790973,85792798-85792852,85793942	F	CATCTGGCCATCCGAGGAGG	124-179
FigureS5C	1700106N22Rik (Camkmt)	MmuEX0000613	chr17:85792798-85792852	55	chr17:85790973,85792798-85792852,85793942	R	TTCTGATGGCCTTTTCATTCCCA	124-179
FigureS5C	Arhgap10	MmuEX0005770	chr8:79906624-79906689	66	chr8:79908650,79906624-79906689,79889059	F	GTTCCACACGTTTAACAGAGCC	119-185
FigureS5C	Arhgap10	MmuEX0005770	chr8:79906624-79906689	66	chr8:79908650,79906624-79906689,79889059	R	CCATCAACATACTCAGAAGTCTCT	119-185
FigureS5C	Acss2	MmuEX0003610	chr2:155376926-155376964	39	chr2:155376205,155376926-155376964,155381590	F	CCCACCAGTTAAGAGGCCATG	119-158
FigureS5C	Acss2	MmuEX0003610	chr2:155376926-155376964	39	chr2:155376205,155376926-155376964,155381590	R	CATCACACCACTCAGGCTCAC	119-158
FigureS5C	Fkbp14	MmuEX0019273	chr6:54536990-54537079	90	chr6:54539267,54536990-54537079,54535924	F	CTGGAGGTTCTCAAAGGCTGG	177-267
FigureS5C	Fkbp14	MmuEX0019273	chr6:54536990-54537079	90	chr6:54539267,54536990-54537079,54535924	R	GGACCTTGGGCCATTTCGAAT	177-267
