# Supplementary figures and images for: An atlas of alternative splicing profiles and functional associations reveals new regulatory programs and genes that simultaneously express multiple major isoforms
Source: HighWire-hosted journal article supplement (doi:10.1101/gr.220962.117), 2017-08-30

**A**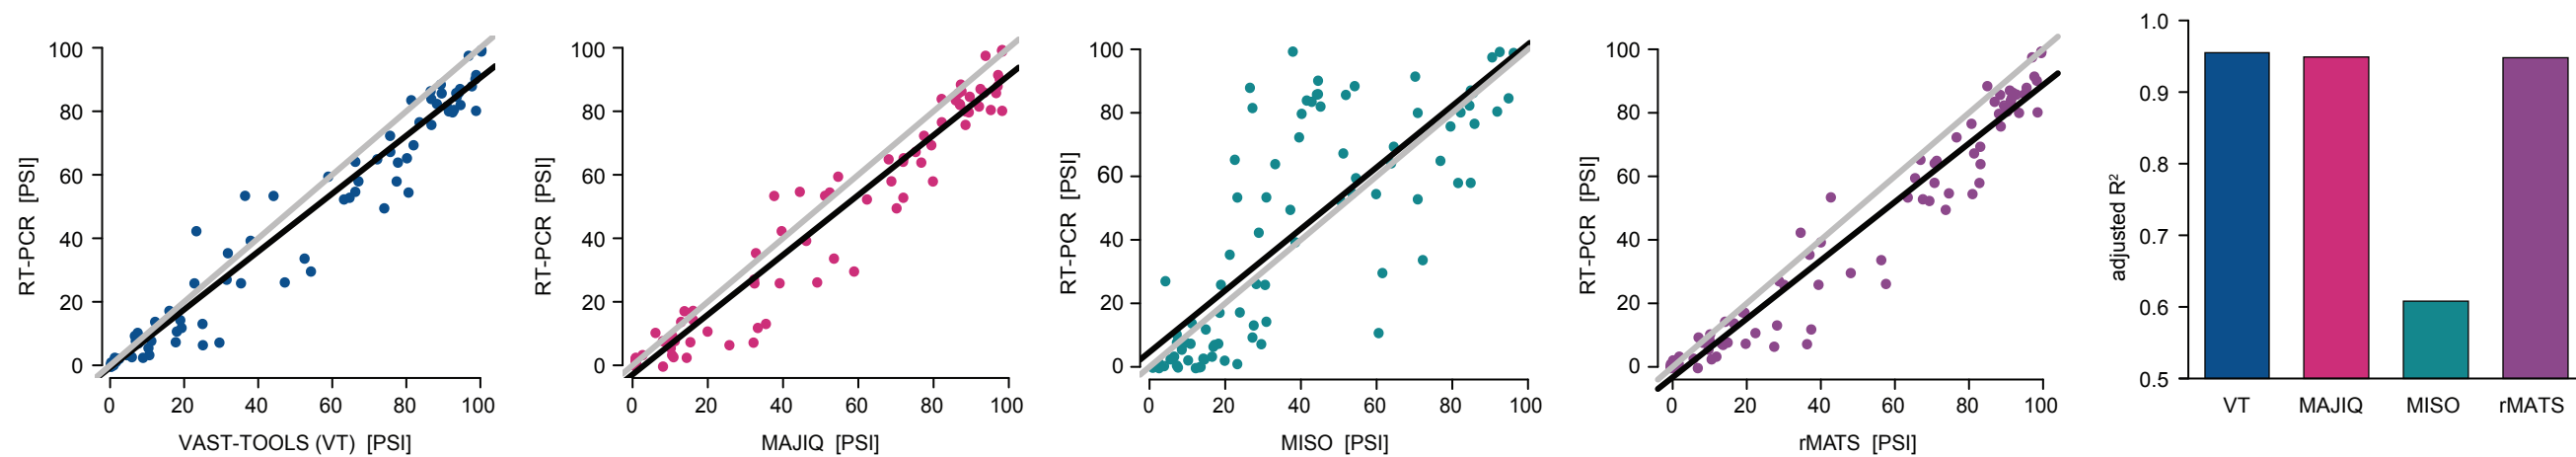**B**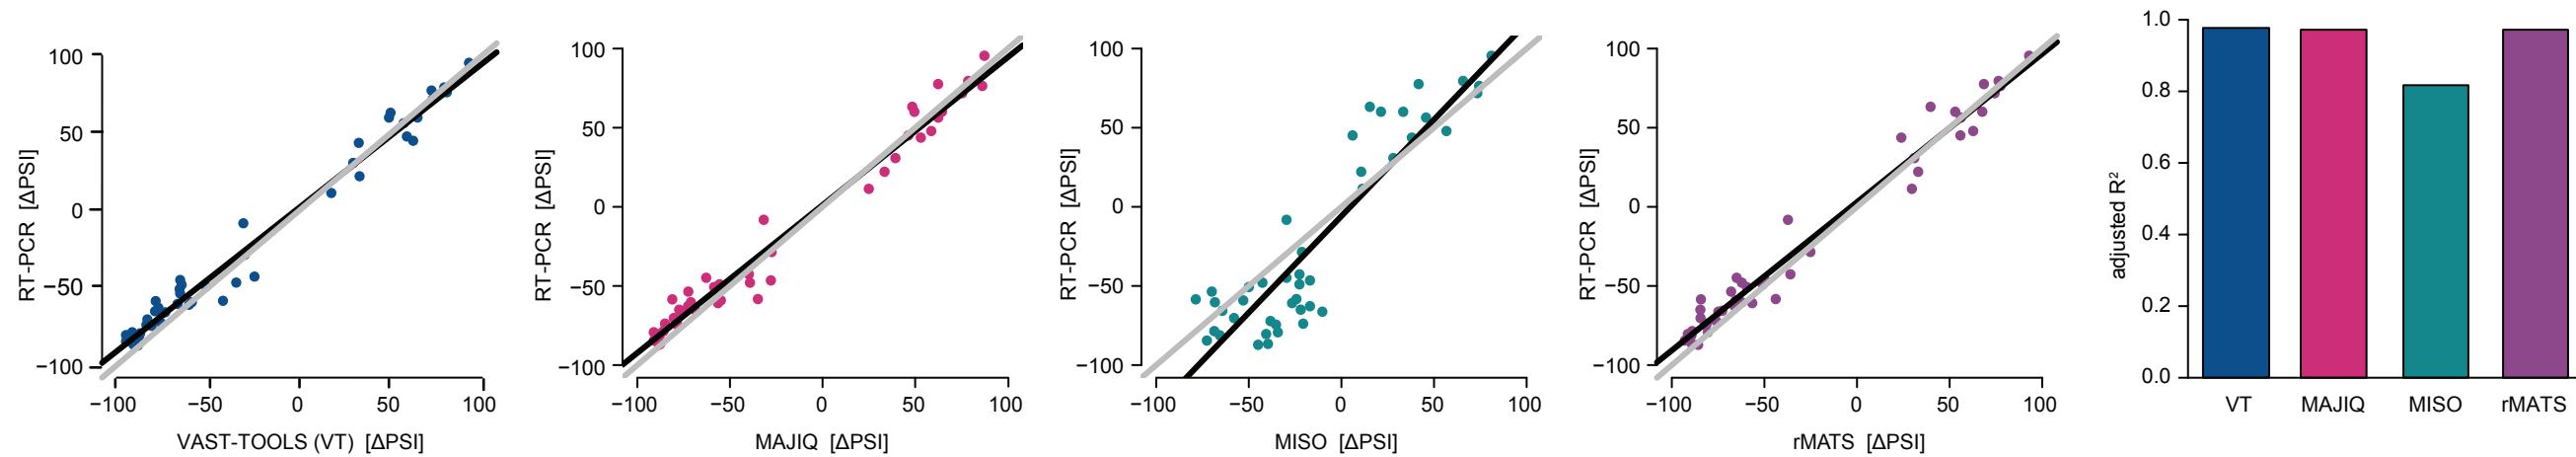**C**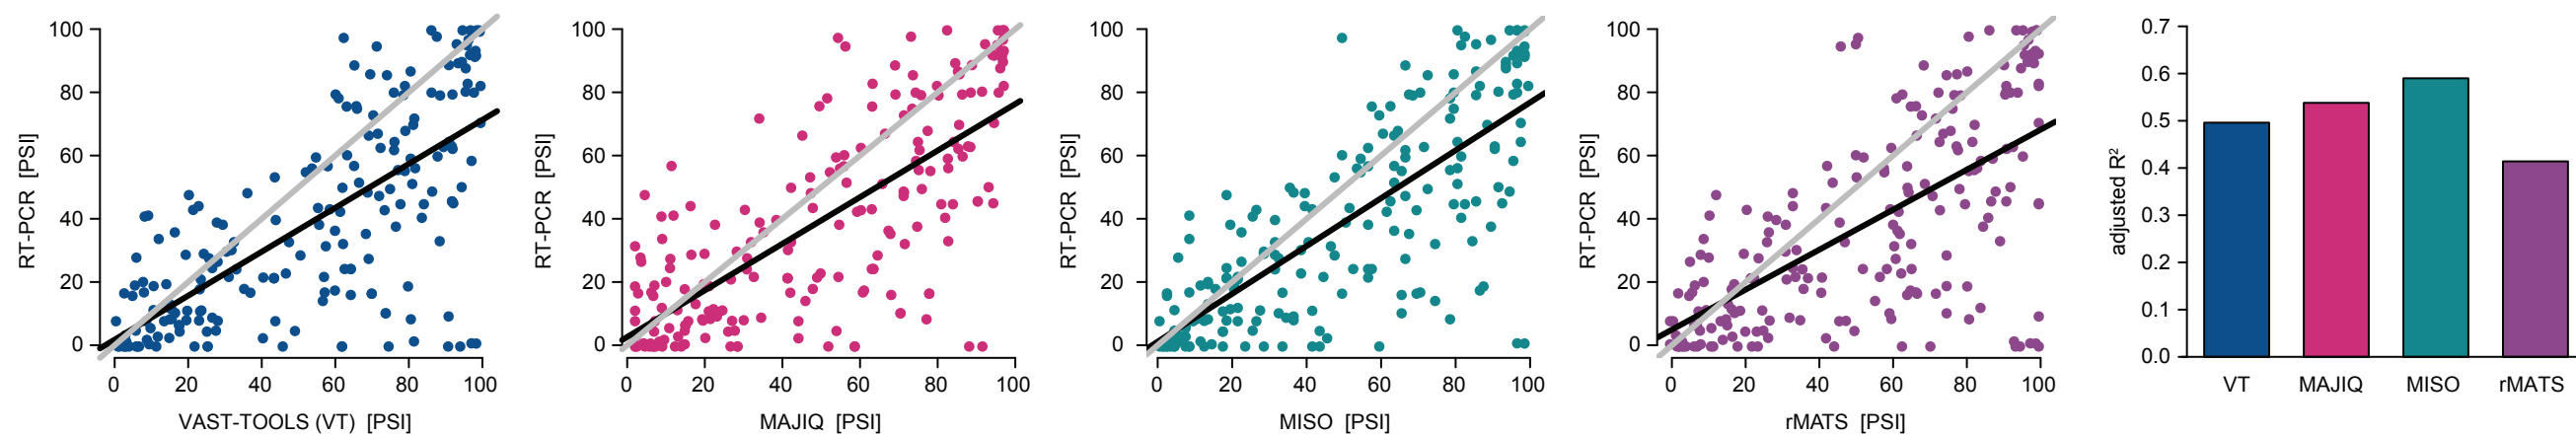**D**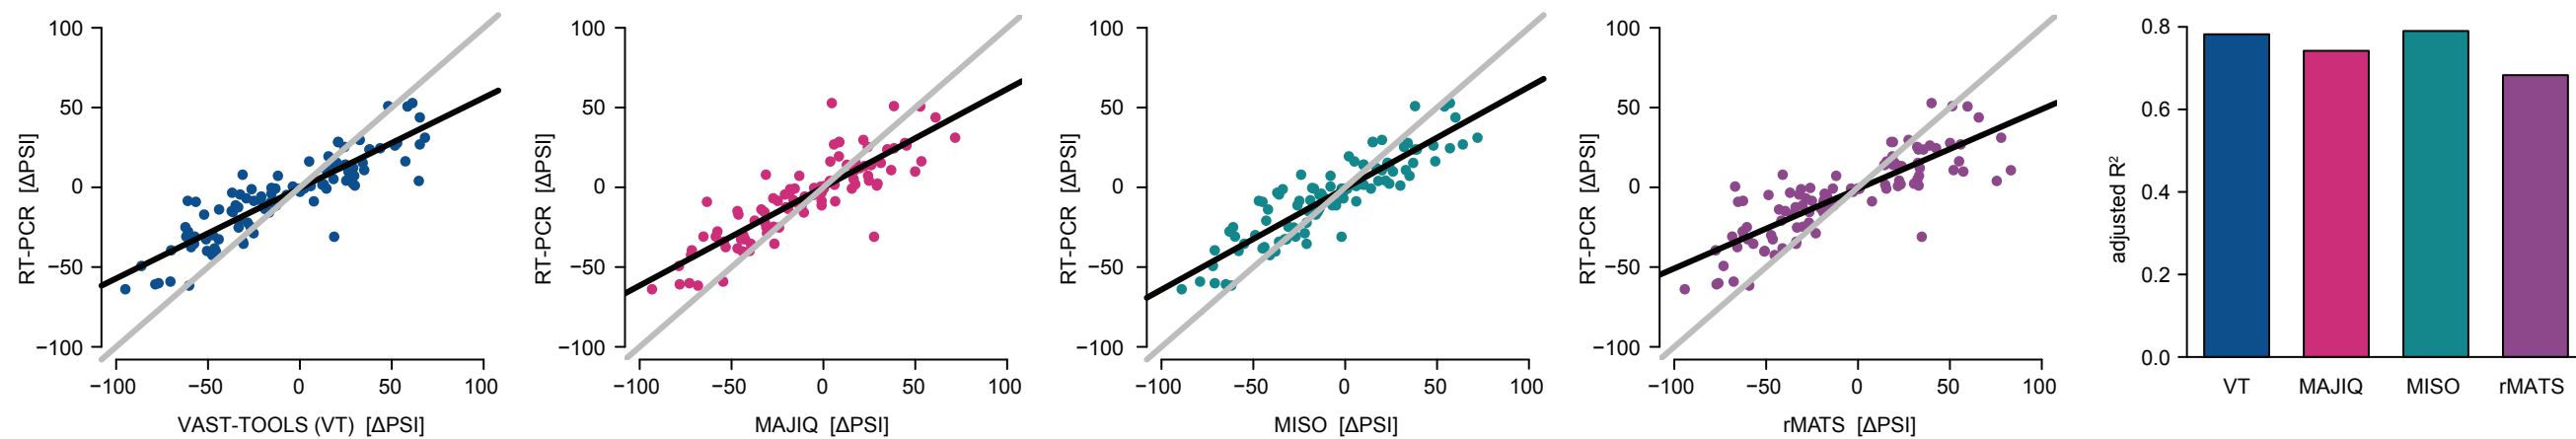

Supplement: Supplemental_Fig_S4.pdf [file Supplemental_Fig_S4.pdf]
